# Supplementary material for: Evidence of episodic positive selection in Corynebacterium diphtheriae complex of species and its implementations in identification of drug and vaccine targets
Source: PeerJ. 2022 Feb 16;10:e12662. doi: 10.7717/peerj.12662 (PMC8857904; doi:10.7717/peerj.12662)
Supplement: Supplemental Information 2 [file peerj-10-12662-s002.xlsx]

## Sheet: Samples
	Genome ID	Genome Name	Organism Name	NCBI Taxon ID	Genome Status	Strain	Serovar	Biovar	Pathovar	MLST	Other Typing	Culture Collection	Type Strain	Completion Date	Publication	BioProject Accession	BioSample Accession	Assembly Accession	SRA Accession	GenBank Accessions	RefSeq Accessions	Sequencing Centers	Sequencing Status	Sequencing Platform	Sequencing Depth	Assembly Method	Chromosomes	Plasmids	Contigs	Genome Length	GC Content	PATRIC CDS	RefSeq CDS	Isolation Site	Isolation Source	Isolation Comments	Collection Date	Isolation Country	Geographic Location	Latitude	Longitude	Altitude	Depth	Other Environmental	Host Name	Host Gender	Host Age	Host Health	Body Sample Site
Representative	1348662.3	Corynebacterium argentoratense DSM 44202	Corynebacterium argentoratense DSM 44202	1348662	Complete	DSM 44202						CIP 104296	Yes	2013-08-27T00:00:00Z	8590681	PRJNA209048	SAMN02603032	GCA_000590555.1		CP006365.1	NC_022198.1	Bielefeld University	complete	Illumina	131.55	Newbler v. 2.8	1		1	2031902	58.9	1913	1875		throat culture										Human, Homo sapiens
Representative	191610.3	Corynebacterium atypicum strain R2070		191610	Complete	R2070								2014-07-24T00:00:00Z	25146145	PRJNA255205	SAMN02911287	GCA_000732945.1		CP008944.1,CP008945.1	NZ_CP008944.1,NZ_CP008945.1	Bielefeld University		Illumina	73.4x	Newbler v. 2.8	1	1	2	2359448	65.3513	2157	1578		unknown human clinical source			United Kingdom	United Kingdom: Wales: Cardiff						Human, Homo sapiens
Representative	548476.3	Corynebacterium aurimucosum ATCC 700975	Corynebacterium aurimucosum ATCC 700975	548476	Complete	ATCC 700975						ATCC 700975		2009-04-24T00:00:00Z		PRJNA37279		GCA_000022905.1		CP001601,FM164414	NC_012590,NC_010813	Bielefeld Univ	complete				1	1	2	2819226	60.6	2574	2551		the human female urogenital tract	isolated from the human female urogenital tract and will be used for comparative analysis									Human, Homo sapiens	female
	1717.381	Corynebacterium belfantii FRC0043		1717	WGS	FRC0043								2017-10-11T00:00:00Z		PRJEB22103	SAMEA104208677	GCA_900205605.1		OANN01000000		INSTITUT PASTEUR							156	2609417	53.62	2785	2557		pseudomembrane		2009-05-06								Human, Homo sapiens
Representative	1121353.3	Corynebacterium callunae DSM 20147	Corynebacterium callunae DSM 20147	1121353	Complete	DSM 20147						DSM 20147		2013-03-06T00:00:00Z		PRJNA190670		GCA_000344785.1		CP004354.1,CP004355.1,CP004356.1	NC_020506.1,NC_020523.1,NC_020553.1	CeBiTec, Bielefeld University	complete	Illumina	99.51	Newbler v. 2.8	1	2	3	2928683	52.4609	2745	2647		heather	isolated from heather
Representative	161896.4	Corynebacterium camporealensis strain DSM 44610		161896	Complete	DSM 44610						DSM 44610		2015-06-10T00:00:00Z	26021938	PRJNA276036	SAMN03365263	GCF_000980815.1		CP011311	NZ_CP011311.1	Bielefeld University		Illumina	114.8x	Newbler v. v.2.8	1		1	2451810	59.41	2262	2249		mammary gland	isolated from milk of a Manchega sheep with subclinical mastitis		Spain	Spain: Cooperativa Castellana de Ganaderos					env_biome:milk;temperature:37	Sheep, Ovis aries
Representative	1285583.3	Corynebacterium casei LMG S-19264	Corynebacterium casei LMG S-19264	1285583	Complete	LMG S-19264						DSM 44701		2014-02-05T00:00:00Z	18936936; 11411705	PRJNA186910	SAMN03081454	GCA_000550785.1		CP004350.1,CP004352.1,CP004351.1	NZ_CP004350.1,NZ_CP004352.1,NZ_CP004351.1	"CeBiTec, Bielefeld University"	complete	Illumina	203.59	Newbler v. 2.6	1	2	3	3132213	55.6977	2833	2809		smear-ripened cheese	isolated from a smear-ripened cheese
Representative	931089.4	Corynebacterium deserti GIMN1.010		931089	Complete	GIMN1.010						DSM:45689		2015-09-02T00:00:00Z		PRJNA222609	SAMN02950576	GCF_001277995.1		CP009220,CP009221,CP009222	NZ_CP009220.1,NZ_CP009221.1,NZ_CP009222.1	Bielefeld University		Illumina	89.9x	Newbler v. 2.8	1	2	3	3033893	55.25	2932	2724		mixed sand sample		2011	China	China: western desert
Representative	1717.62	Corynebacterium diphtheriae strain NCTC11397		1717	Complete	NCTC11397	gravis			MLST.Corynebacterium_diphtheriae.26				2015-05-09T00:00:00Z		PRJEB6403	SAMEA2517360	GCF_001457455.1	ERR550510	LN831026	NZ_LN831026.1	SC					1		1	2463666	53.52	2439	2337				1969	United States	United States
Representative	558173.4	Corynebacterium doosanense CAU 212 = DSM 45436		558173	Complete	CAU 212						DSM 45436		2014-10-16T00:00:00Z	-	PRJNA219342	SAMN02356458	GCA_000767055.1		CP006764.1,CP006765.1	NZ_CP006764.1,NZ_CP006765.1	Bielefeld University		Illumina		Newbler v. 2.8	1	1	2	2698995	66.78	2583	2492		activated sludge	isolated from activated sludge
	196164.6	Corynebacterium efficiens YS-314	Corynebacterium efficiens YS-314	196164	Complete	YS-314							Yes	2003-07-04T00:00:00Z	12840036	PRJNA305	SAMN00139182	GCA_000011305.1	SRR089499	AP005226,BA000035,AP005225	NC_004320,NC_004369,NC_004319	NITE	complete				1	2	3	3219505	63	2897	2994		soils at Kanagawa, Japan	isolated by researchers of Ajinomoto food company from soils at Kanagawa, Japan in the late 1980's	late 1980's	Japan	Kanagawa Japan
Representative	1050174.4	Corynebacterium epidermidicanis strain DSM 45586		1050174	Complete	DSM 45586						DSM:45586		2015-06-05T00:00:00Z		PRJNA280479	SAMN03462986	GCF_001021025.1		CP011541	NZ_CP011541.1	Bielefeld University		Illumina	153.0x	Newbler v. v.2.8	1		1	2692072	58.06	2566	2465		skin		2011								Dog, Canis lupus familiaris
	1451189.3	Corynebacterium falsenii DSM 44353	Corynebacterium falsenii DSM 44353	1451189	Complete	DSM 44353						DSM 44353		2014-02-03T00:00:00Z	24604654; 9542078	PRJNA235944	SAMN02641485	GCA_000525655.1		CP007156.1,CP007157.1	NZ_CP007156.1,NZ_CP007157.1	Bielefeld University	complete	Illumina	81.01x	Newbler v. 2.8	1	1	2	2719616	63.1768	2374	2306		blood										Human, Homo sapiens	Male	4	acute lymphatic leukemia
Representative	196627.14	Corynebacterium glutamicum ATCC 13032	Corynebacterium glutamicum ATCC 13032	196627	Complete	ATCC 13032						ATCC 13032		2004-01-26T00:00:00Z		PRJNA13760	SAMEA3138338	GCA_000196335.1		BX927147	NC_006958	Universitaet Bielefeld	complete				1		1	3282708	53.8	3000	3057			isolated in the late 1950's	late 1950's
Representative	1404245.3	Corynebacterium glycinophilum AJ 3170		1404245	Complete	AJ 3170						ATCC 21341		2014-04-11T00:00:00Z	-	PRJNA221205	SAMN03081498	GCA_000626675.1		CP006842.1,CP006843.1	NZ_CP006842.1,NZ_CP006843.1	Bielefeld University		454; Illumina		Newbler v. 2.8	1	1	2	3568218	64.7345	3340	3270
Representative	1121362.3	Corynebacterium halotolerans YIM 70093 = DSM 44683	Corynebacterium halotolerans YIM 70093 = DSM 44683	1121362	Complete	YIM 70093(T)						DSM 44683		2013-02-20T00:00:00Z	23408721	PRJNA168616		GCA_000341345.1		CP003697.1,CP003698.1	NC_020302.1,NC_020303.1	Bielefeld University	complete	Sanger dideoxy sequencing; 454; Illumina		Newbler v.2.3	1	1	2	3222008	68.2608	2931	2865		saline soil	saline soil		China	China: Xinjiang Provine
Representative	1223515.3	Corynebacterium humireducens NBRC 106098 = DSM 45392		1223515	Complete	MFC-5						DSM 45392		2015-01-16T00:00:00Z	-	PRJNA172965	SAMN03283197	GCA_000819445.1		CP005286.1	NZ_CP005286.1	CeBiTec, Bielefeld University		Illumina	198.1	Newbler v. 2.6	1		1	2681312	68.57	2563	2545			isolated form a wastewater-fed microbial fuel cell
Representative	156978.3	Corynebacterium imitans strain DSM 44264		156978	Complete	DSM 44264						DSM 44264		2014-08-14T00:00:00Z	25414508	PRJNA246650	SAMN02950575	GCA_000739455.1		CP009211.1	NZ_CP009211.1	Bielefeld University		Illumina	205.9	Newbler v. 2.8	1		1	2565321	64.3	2326	2013		patients with suspected diphtheria	isolated from patients with suspected diphtheria	1996	Poland	Poland: regional hospital of Przemysl						Human, Homo sapiens
Representative	306537.10	Corynebacterium jeikeium K411	Corynebacterium jeikeium K411	306537	Complete	K411								2005-06-27T00:00:00Z	15968079	PRJNA13967	SAMEA3283089	GCA_000006605.1		CR931997,AF401314	NC_007164,NC_003080	Bielefeld Univ	complete				1	1	2	2476822	61.4	2127	2120		the axilla of a bone marrow transplant patient	isolated from the axilla of a bone marrow transplant patient									Human, Homo sapiens
Representative	645127.4	Corynebacterium kroppenstedtii DSM 44385	Corynebacterium kroppenstedtii DSM 44385	645127	Complete	DSM 44385						DSM 44385	Yes	2009-05-19T00:00:00Z	18430482	PRJNA38011	SAMN02603033	GCA_000023145.1		CP001620	NC_012704	Bielefeld Univ	complete				1		1	2446804	57.5	2193	2018		human sputum	isolated from human sputum									Human, Homo sapiens
Representative	35755.3	Corynebacterium kutscheri strain DSM 20755		35755	Complete	DSM 20755						DSM:20755	Yes	2015-06-10T00:00:00Z	26021937	PRJNA276037	SAMN03365283	GCF_000980835.1		CP011312	NZ_CP011312.1	Bielefeld University		Sanger dideoxy sequencing; Illumina	213.6x	Newbler v. v.2.8	1		1	2354065	46.46	2187	2089		lung										Mouse, Mus musculus
Representative	1408189.4	Corynebacterium lactis RW2-5		1408189	Complete	RW2-5						DSM:45799		2015-08-26T00:00:00Z		PRJNA222474	SAMN04012704	GCF_001274895.1		CP006841	NZ_CP006841.1	Bielefeld University		Illumina	128.56	Newbler v. 2.8	1		1	2769745	60.53	2493	2364		raw milk	isolated from raw milk
Representative	1224162.3	Corynebacterium marinum DSM 44953		1224162	Complete	DSM 44953						DSM 44953		2015-02-10T00:00:00Z	19783605	PRJNA172963	SAMN02800399	GCA_000835165.1		CP007790.1,CP007792.1,CP007791.1	NZ_CP007790.1,NZ_CP007792.1,NZ_CP007791.1	CeBiTec, Bielefeld University		Illumina	243.8x	Newbler v. 2.8	1	2	3	2729219	67.75	2552	2552		marine sediment	isolated from marine sediment	2002	China	China: coastal sediment close to a coal-fired power station, Qingdao
Representative	1224163.3	Corynebacterium maris DSM 45190	Corynebacterium maris DSM 45190	1224163	Complete	Coryn-1						DSM 45190		2013-08-01T00:00:00Z	19622641	PRJNA172964	SAMN02603057	GCA_000442645.1		CP003924.1,CP003925.1	NC_021915.1,NC_021920.1	CeBiTec, Bielefeld University	complete	Illumina	56.45	Newbler v. 2.6	1	1	2	2833547	66.6124	2624	2584		coral mucus	isolated from coral mucus									Coral, Fungia granulosa				mucus
Representative	571915.4	Corynebacterium mustelae strain DSM 45274		571915	Complete	DSM 45274						DSM:45274		2015-09-23T00:00:00Z	26358597	PRJNA282348	SAMN03568800	GCF_001020985.1		CP011542,CP011543,CP011544	NZ_CP011542.1,NZ_CP011543.1,NZ_CP011544.1	Bielefeld University		Illumina	199.0x	Newbler v. v.2.8	1	2	3	3474226	52.57	3414	3110		necropsy lung, liver and kidney tissue										Mustela putorius furo
	1087451.3	Corynebacterium pseudotuberculosis 31	Corynebacterium pseudotuberculosis 31	1087451	Complete	31		biovar ious						2012-04-18T00:00:00Z		PRJNA73223	SAMN02603749	GCA_000259155.2	SRR2008154	CP003421.1	NC_017730.1	Rede Paraense de Genomica e Proteomica	complete				1		1	2297010	52.2	2179	2063
	1719.2381	Corynebacterium pseudotuberculosis strain ATCC 19410		1719	Complete	ATCC 19410		biovar Ovis				ATCC 19410		2017-05-22T00:00:00Z		PRJNA382169	SAMN06701041			CP021251		UFMG		IonTorrent	178.57x	Newbler v. 2.9	1		1	2337763	52.18	2258	2146		Abscess	isolated from sheep									Sheep, Ovis aries
Representative	156976.3	Corynebacterium riegelii strain PUDD_83A45		156976	Complete	PUDD_83A45								2015-08-10T00:00:00Z		PRJNA290807	SAMN03897721	GCF_001263755.1		CP012342		UCSF		Nextera paired-end, Illumina; Nextera	225.0x	SPAdes v. 3.5			1	2563723	60.5	2437	2214		urine		27-Aug-2003	United States	USA: San Francisco						Human, Homo sapiens			recurrent UTI
	1717.588	Corynebacterium rouxii FRC0190		1717	Complete	FRC0190				MLST.Corynebacterium_diphtheriae.181				2019-11-22T00:00:00Z		PRJEB22103	SAMEA5992727	GCA_902702935.1		LR738855		INSTITUT PASTEUR					1		1	2451019	53.2285	2504	2359		Cutaneous		2013	France	France						diphtheria Nat. Ref. Center, Institut Pasteur, Paris
	2320431.3	Corynebacterium silvaticum KL0182		2320431	WGS	KL0182							Yes	2019-03-26T00:00:00Z		PRJNA517029	SAMN10039578	GCA_004382825.1		SDQO01000000		Bavarian Health and Food Safety Authority		Illumina MiSeq	78.3x	SPAdes v. 3.11.1			25	2553200	54.4411	2658	2323				2010	Germany	Germany						Pig, Sus scrofa			lymphadenitis
Representative	146827.5	Corynebacterium simulans strain PES1		146827	Complete	PES1								2016-03-10T00:00:00Z	26861018	PRJNA279606	SAMN03455925	GCA_001586215.1		CP014634	NZ_CP014634.1	NHGRI		PacBio RSII	100x	HGAP v. 2.0	1		1	2737971	59.01	2596	2560		Skin swab		26-Dec-2013	United States	United States					env_biome:human-associated habitat	Human, Homo sapiens
Representative	161899.3	Corynebacterium singulare IBS B52218		161899	Complete	IBS B52218						DSM 44357		2015-02-06T00:00:00Z	-	PRJNA246651	SAMN03177398	GCA_000833575.1		CP010827.1	NZ_CP010827.1	Bielefeld University		Illumina	206.9	Newbler v. v. 2.8	1		1	2830519	60.12	2571	2561		semen			France	France: Institute of Bacteriology of Strasbourg						Human, Homo sapiens
	1200352.3	Corynebacterium terpenotabidum Y-11	Corynebacterium terpenotabidum Y-11	1200352	Complete	Y-11						DSM 44721		2013-07-05T00:00:00Z	16347551: 10028267: 1115507: 869527	PRJNA168617	SAMN02603028	GCA_000418365.1		CP003696.1	NC_021663.1	Bielefeld University	complete	Sanger dideoxy sequencing; 454; Illumina		Newbler v. 2.3	1		1	2751233	67	2451	2369
Representative	136857.5	Corynebacterium testudinoris strain DSM 44614		136857	Complete	DSM 44614						DSM:44614		2015-08-05T00:00:00Z	26227591	PRJNA280910	SAMN03480629	GCF_001021045.1		CP011545	NZ_CP011545.1	Bielefeld University		Illumina	226.5x	Newbler v. v.2.8	1		1	2721226	63.14	2595	2560		necrotic lesions in the mouth										Testudinidae
	1258583.3	Corynebacterium ulcerans NCTC 12077	Corynebacterium ulcerans NCTC 12077	1258583	WGS	NCTC 12077						NCTC 12077		2013-11-25T00:00:00Z		PRJNA179437	SAMN02470561	GCA_000498915.1		AYUJ00000000	-	Moredun Research Institute	WGS	454; Illumina	40.0x	Newbler v. 2; Velvet v. 0.7; Minimus v. 2			15	2616289	53.4	2524	2296		Throat swab of office worker										Human, Homo sapiens
	65058.133	Corynebacterium ulcerans strain NCTC7910		65058	Complete	NCTC7910						NCTC:7910		2017-08-15T00:00:00Z		PRJEB6403	SAMEA4504038	GCA_900187135.1		LT906443		SC					1		1	2453761	53.31	2263	2178		throat		1948	United Kingdom	United Kingdom						Human woman
Representative	504474.4	Corynebacterium urealyticum DSM 7109	Corynebacterium urealyticum DSM 7109	504474	Complete	DSM 7109						DSM 7109	Yes	2008-04-02T00:00:00Z	18367281	PRJNA29211	SAMEA3138282	GCA_000069945.1		AM942444	NC_010545	Bielefeld Univ	complete				1		1	2369219	64.2	2002	2024		case of cystitis	isolated from a case of cystitis
Representative	401472.3	Corynebacterium ureicelerivorans strain IMMIB RIV-2301		401472	Complete	IMMIB RIV-2301						DSM 45051		2014-09-03T00:00:00Z	19089476,25414509	PRJNA257688	SAMN02953970	GCA_000747315.1		CP009215.1,CP009216.1	NZ_CP009215.1,NZ_CP009216.1	Bielefeld University		Illumina	370.5x	Newbler v. 2.8	1	1	2	2328278	64.9917	2248	1922		blood culture		2007	Germany	Germany: Bonn						Human, Homo sapiens
Representative	1072256.5	Corynebacterium uterequi strain DSM 45634		1072256	Complete	DSM 45634						DSM:45634		2015-08-05T00:00:00Z	26227590	PRJNA280912	SAMN03480647	GCF_001021065.1		CP011546	NZ_CP011546.1	Bielefeld University		Illumina	144.0x	Newbler v. v.2.8	1		1	2419437	65.5	2200	2163		uterus of a maiden mare		May-2011	Sweden	Sweden: Henan					temperature:37	Horse, Equus caballus
Representative	1224164.3	Corynebacterium vitaeruminis DSM 20294	Corynebacterium vitaeruminis DSM 20294	1224164	Complete	ATCC 10234						DSM 20294		2014-02-05T00:00:00Z		PRJNA172966	SAMN03081455	GCA_000550805.1		CP004353.1	NZ_CP004353.1	"CeBiTec, Bielefeld University"	complete	Sanger dideoxy sequencing; Illumina	42.82	Newbler v. 2.6	1		1	2931780	65.5	2621	2577		cow rumen	isolated from cow rumen									Cow, Bos taurus
	83332.111	Mycobacterium tuberculosis H37Rv (Broad) (External group)	Mycobacterium tuberculosis H37Rv (Broad)	83332	Complete	H37Rv								2012-07-12T00:00:00Z		PRJNA37301		GCA_000277735.2		CP003248.2	NC_018143.2	Broad Institute	complete				1		1	4411709	65.6	4368	4036
[truncated: 24 more columns]
