# Supplementary material for: Evidence of episodic positive selection in Corynebacterium diphtheriae complex of species and its implementations in identification of drug and vaccine targets
Source: PeerJ. 2022 Feb 16;10:e12662. doi: 10.7717/peerj.12662 (PMC8857904; doi:10.7717/peerj.12662)
Supplement: Supplemental Information 3 [file peerj-10-12662-s003.xlsx]

## Sheet:  Foregrounds
Foreground	Species	Strains
Cb	Corynebacterium belfantii	FRC0043
Cd	Corynebacterium diphtheriae	NCTC 11397
Cp	Corynebacterium pseudotuberculosis	31, ATCC 19410
Cpequi	Corynebacterium pseudotuberculosis	31
Cpovis	Corynebacterium pseudotuberculosis	ATCC 19410
Cr	Corynebacterium rouxii	FRC0190
Cs	Corynebacterium silvaticum	KL0182
Cul	Corynebacterium ulcerans	NCTC 7910, NCTC 12077
Cul1	Corynebacterium ulcerans	NCTC 7910
Cul2	Corynebacterium ulcerans	NCTC 12077
