# Supplementary material for: Evidence of episodic positive selection in Corynebacterium diphtheriae complex of species and its implementations in identification of drug and vaccine targets
Source: PeerJ. 2022 Feb 16;10:e12662. doi: 10.7717/peerj.12662 (PMC8857904; doi:10.7717/peerj.12662)
Supplement: Supplemental Information 5 [file peerj-10-12662-s005.xlsx]

## Sheet: Cd
Gene	Transcript	Bonferroni	FDR	P-Value	P-Value raw	Number of species included	Species included	HA foreground omega	HA background omega	HA kappa	H0 foreground omega	H0 background omega	H0 kappa	Correction code	Number of Sites under positive Selection	Site under positve Selection 1(1. Probability to be under positive selection;2. Position in amino acid sequence of anchor species;3. Position in nucleotide sequence of anchor species;4.Position in main protein alignment:fastp.clustalw.aln;5. Position in protein clustal subalignment: .aln;6. Position in to codon backtranslated clustal subalignment: Codon_aln.fasta; 7. Position in prank alignment (…	Site under positve Selection 2	Site under positve Selection 3	Site under positve Selection 4	Site under positve Selection 5	Site under positve Selection 6	Site under positve Selection 7	Site under positve Selection 8	Site under positve Selection 9	Site under positve Selection 10	Site under positve Selection 11	Site under positve Selection 12	Site under positve Selection 13	Site under positve Selection 14	Site under positve Selection 15	Site under positve Selection 16	Site under positve Selection 17	Site under positve Selection 18	Site under positve Selection 19	Site under positve Selection 20	Site under positve Selection 21	Site under positve Selection 22	Site under positve Selection 23	Site under positve Selection 24	Site under positve Selection 25	Site under positve Selection 26	Site under positve Selection 27	Site under positve Selection 28	Site under positve Selection 29	Site under positve Selection 30	Site under positve Selection 31	Site under positve Selection 32	Site under positve Selection 33	Site under positve Selection 34
ERS451417_00402	1717.62.peg.402	0.0127	0.0127	0.0003175	0.0003175	39	Cargentoratense_DSM44202,"Catypicum_R2070","Caurimucosum_ATCC700975","Cbelfantii_FRC0043","Ccallunae_DSM20147","Ccamporealensis_DSM44610","Cdeserti_GIMN1010","Cdiphtheriae_NCTC11397","Cdoosanense_DSM45436","Cefficiens_YS314","Cepidermidicanis_DSM45586","Cfalsenii_DSM44353","Cglutamicum_ATCC13032","Cglycinophilum_AJ3170","Chalotolerans_YIM70093","Chumireducens_DSM45392","Cimitans_DSM44264","Cjeike…	5.28841	0.10414	2.3336	0.407351	0.104042	2.32574	0	1	1. 0.99938;2. 89;3. 265;4. 90;5. 90;6. 268;7. 90;8. 268;9. 259;10. S;11. TCG
ERS451417_02000	1717.62.peg.2004	0.03136	0.0132333	0.000784	0.000784	7	Cbelfantii_FRC0043,"Cdiphtheriae_NCTC11397","Cpseudotuberculosis_31","Cpseudotuberculosis_ATCC19410","Csilvaticum_KL0182","Culcerans_NCTC12077","Culcerans_NCTC7910"	8.16979	0.190062	3.96888	0.202218	0.19356	3.77112	0	5	1. 0.62518;2. 94;3. 280;4. 94;5. 94;6. 280;7. 94;8. 280;9. 280;10. C;11. TGC	1. 0.69017;2. 198;3. 592;4. 198;5. 198;6. 592;7. 198;8. 592;9. 592;10. A;11. GCC	1. 0.56614;2. 270;3. 808;4. 270;5. 270;6. 808;7. 270;8. 808;9. 808;10. L;11. CTC	1. 0.93395;2. 272;3. 814;4. 272;5. 272;6. 814;7. 272;8. 814;9. 814;10. R;11. CGC	1. 0.51511;2. 276;3. 826;4. 276;5. 276;6. 826;7. 276;8. 826;9. 826;10. D;11. GAT
ERS451417_00414	1717.62.peg.414	0.0397	0.0132333	0.0009925	0.0009925	11	Catypicum_R2070,"Cbelfantii_FRC0043","Cdiphtheriae_NCTC11397","Cepidermidicanis_DSM45586","Ckutscheri_DSM20755","Cpseudotuberculosis_31","Cpseudotuberculosis_ATCC19410","Crouxii_FRC0190","Csilvaticum_KL0182","Culcerans_NCTC12077","Culcerans_NCTC7910"	4.75436	0.119557	2.33981	0.147455	0.118524	2.34005	0	3	1. 0.52693;2. 69;3. 205;4. 93;5. 92;6. 274;7. 116;8. 346;9. 40;10. V;11. GTA	1. 0.43581;2. 182;3. 544;4. 206;5. 205;6. 613;7. 229;8. 685;9. 373;10. A;11. GCG	1. 0.9937;2. 339;3. 1015;4. 379;5. 362;6. 1084;7. 386;8. 1156;9. 844;10. A;11. GCA
ERS451417_01776	1717.62.peg.1778	0.1268	0.0317	0.00317	0.00317	5	Cbelfantii_FRC0043,"Cdiphtheriae_NCTC11397","Cepidermidicanis_DSM45586","Cglycinophilum_AJ3170","Clactis_RW25"	3.66742	0.100955	1.55944	0.142499	0.10093	1.53612	0	28	1. 0.66872;2. 31;3. 91;4. 75;5. 46;6. 136;7. 50;8. 148;9. 49;10. S;11. AGC	1. 0.70801;2. 50;3. 148;4. 94;5. 65;6. 193;7. 69;8. 205;9. 106;10. V;11. GTG	1. 0.92185;2. 55;3. 163;4. 99;5. 70;6. 208;7. 74;8. 220;9. 121;10. R;11. CGA	1. 0.81755;2. 59;3. 175;4. 103;5. 74;6. 220;7. 78;8. 232;9. 133;10. R;11. CGC	1. 0.70069;2. 69;3. 205;4. 113;5. 84;6. 250;7. 88;8. 262;9. 163;10. V;11. GTG	1. 0.84806;2. 96;3. 286;4. 140;5. 111;6. 331;7. 115;8. 343;9. 244;10. V;11. GTG	1. 0.75978;2. 112;3. 334;4. 156;5. 127;6. 379;7. 131;8. 391;9. 292;10. N;11. AAC	1. 0.52766;2. 113;3. 337;4. 157;5. 128;6. 382;7. 132;8. 394;9. 295;10. K;11. AAA	1. 0.68678;2. 117;3. 349;4. 163;5. 132;6. 394;7. 136;8. 406;9. 307;10. D;11. GAC	1. 0.74208;2. 143;3. 427;4. 190;5. 159;6. 475;7. 163;8. 487;9. 385;10. S;11. TCC	1. 0.77114;2. 237;3. 709;4. 299;5. 253;6. 757;7. 257;8. 769;9. 667;10. A;11. GCC	1. 0.45771;2. 245;3. 733;4. 335;5. 261;6. 781;7. 265;8. 793;9. 691;10. R;11. AGA	1. 0.61336;2. 257;3. 769;4. 347;5. 273;6. 817;7. 277;8. 829;9. 727;10. S;11. TCA	1. 0.78851;2. 268;3. 802;4. 358;5. 284;6. 850;7. 288;8. 862;9. 760;10. N;11. AAC	1. 0.92285;2. 327;3. 979;4. 417;5. 343;6. 1027;7. 347;8. 1039;9. 937;10. R;11. CGT	1. 0.99131;2. 334;3. 1000;4. 424;5. 350;6. 1048;7. 354;8. 1060;9. 958;10. S;11. AGT	1. 0.87572;2. 516;3. 1546;4. 622;5. 535;6. 1603;7. 539;8. 1615;9. 1501;10. D;11. GAC	1. 0.59939;2. 542;3. 1624;4. 653;5. 566;6. 1696;7. 570;8. 1708;9. 1570;10. R;11. CGC	1. 0.54099;2. 549;3. 1645;4. 660;5. 573;6. 1717;7. 577;8. 1729;9. 1591;10. H;11. CAC	1. 0.75738;2. 552;3. 1654;4. 663;5. 576;6. 1726;7. 580;8. 1738;9. 1600;10. D;11. GAT	1. 0.87817;2. 553;3. 1657;4. 664;5. 577;6. 1729;7. 581;8. 1741;9. 1603;10. A;11. GCT	1. 0.70886;2. 582;3. 1744;4. 693;5. 606;6. 1816;7. 610;8. 1828;9. 1690;10. H;11. CAC	1. 0.87806;2. 691;3. 2071;4. 819;5. 716;6. 2146;7. 727;8. 2179;9. 1972;10. P;11. CCG	1. 0.8345;2. 729;3. 2185;4. 859;5. 754;6. 2260;7. 766;8. 2296;9. 2074;10. A;11. GCG	1. 0.72093;2. 843;3. 2527;4. 1285;5. 868;6. 2602;7. 886;8. 2656;9. 2383;10. T;11. ACC	1. 0.97992;2. 867;3. 2599;4. 1309;5. 892;6. 2674;7. 910;8. 2728;9. 2455;10. S;11. TCT	1. 0.79569;2. 898;3. 2692;4. 1480;5. 923;6. 2767;7. 941;8. 2821;9. 2548;10. R;11. CGC	1. 0.46947;2. 902;3. 2704;4. 1484;5. 927;6. 2779;7. 945;8. 2833;9. 2560;10. M;11. ATG
ERS451417_01379	1717.62.peg.1388	0.27672	0.055344	0.006918	0.006918	7	Cbelfantii_FRC0043,"Cdiphtheriae_NCTC11397","Cpseudotuberculosis_31","Cpseudotuberculosis_ATCC19410","Csilvaticum_KL0182","Culcerans_NCTC12077","Culcerans_NCTC7910"	1	0.15151	3.13475	0.171713	0.171713	3.17176	0	23	1. 0.41081;2. 12;3. 34;4. 106;5. 29;6. 85;7. 29;8. 85;9. 7;10. A;11. GCA	1. 0.44662;2. 15;3. 43;4. 109;5. 32;6. 94;7. 32;8. 94;9. 16;10. V;11. GTA	1. 0.58348;2. 56;3. 166;4. 165;5. 73;6. 217;7. 73;8. 217;9. 139;10. A;11. GCC	1. 0.67537;2. 88;3. 262;4. 215;5. 105;6. 313;7. 107;8. 319;9. 223;10. V;11. GTT	1. 0.70083;2. 95;3. 283;4. 222;5. 112;6. 334;7. 114;8. 340;9. 244;10. L;11. CTC	1. 0.66957;2. 105;3. 313;4. 234;5. 122;6. 364;7. 124;8. 370;9. 259;10. S;11. TCT	1. 0.53097;2. 111;3. 331;4. 240;5. 128;6. 382;7. 130;8. 388;9. 277;10. V;11. GTC	1. 0.53266;2. 134;3. 400;4. 263;5. 151;6. 451;7. 153;8. 457;9. 346;10. A;11. GCC	1. 0.41351;2. 147;3. 439;4. 280;5. 164;6. 490;7. 166;8. 496;9. 385;10. Y;11. TAC	1. 0.66671;2. 155;3. 463;4. 288;5. 172;6. 514;7. 174;8. 520;9. 409;10. I;11. ATA	1. 0.40919;2. 175;3. 523;4. 308;5. 192;6. 574;7. 194;8. 580;9. 469;10. R;11. AGA	1. 0.53921;2. 177;3. 529;4. 310;5. 194;6. 580;7. 196;8. 586;9. 475;10. M;11. ATG	1. 0.57632;2. 185;3. 553;4. 318;5. 202;6. 604;7. 204;8. 610;9. 499;10. V;11. GTA	1. 0.53104;2. 207;3. 619;4. 340;5. 224;6. 670;7. 230;8. 688;9. 538;10. I;11. ATA	1. 0.57681;2. 279;3. 835;4. 416;5. 296;6. 886;7. 302;8. 904;9. 754;10. F;11. TTC	1. 0.53867;2. 288;3. 862;4. 456;5. 305;6. 913;7. 311;8. 931;9. 781;10. N;11. AAT	1. 0.44364;2. 329;3. 985;4. 497;5. 346;6. 1036;7. 352;8. 1054;9. 904;10. R;11. CGC	1. 0.54012;2. 331;3. 991;4. 499;5. 348;6. 1042;7. 354;8. 1060;9. 910;10. R;11. AGG	1. 0.41487;2. 332;3. 994;4. 500;5. 349;6. 1045;7. 355;8. 1063;9. 913;10. S;11. TCT	1. 0.74121;2. 334;3. 1000;4. 521;5. 351;6. 1051;7. 357;8. 1069;9. 919;10. A;11. GCG	1. 0.68418;2. 340;3. 1018;4. 527;5. 357;6. 1069;7. 363;8. 1087;9. 937;10. I;11. ATT	1. 0.48525;2. 351;3. 1051;4. 538;5. 368;6. 1102;7. 374;8. 1120;9. 970;10. V;11. GTA	1. 0.45417;2. 389;3. 1165;4. 578;5. 406;6. 1216;7. 412;8. 1234;9. 1084;10. F;11. TTT
ERS451417_02151	1717.62.peg.2173	0.9624	0.141086	0.02406	0.02406	8	Cbelfantii_FRC0043,"Cdiphtheriae_NCTC11397","Clactis_RW25","Cpseudotuberculosis_31","Cpseudotuberculosis_ATCC19410","Csilvaticum_KL0182","Culcerans_NCTC12077","Culcerans_NCTC7910"	19.9197	0.0913252	2.54536	0.248264	0.090513	2.53792	0	7	1. 0.88379;2. 149;3. 445;4. 180;5. 164;6. 490;7. 184;8. 550;9. 259;10. I;11. ATA	1. 0.82292;2. 248;3. 742;4. 296;5. 264;6. 790;7. 284;8. 850;9. 553;10. I;11. ATA	1. 0.88149;2. 318;3. 952;4. 384;5. 334;6. 1000;7. 354;8. 1060;9. 763;10. V;11. GTG	1. 0.85925;2. 356;3. 1066;4. 423;5. 372;6. 1114;7. 392;8. 1174;9. 877;10. S;11. TCC	1. 0.45152;2. 409;3. 1225;4. 477;5. 425;6. 1273;7. 445;8. 1333;9. 1036;10. A;11. GCA	1. 0.90943;2. 419;3. 1255;4. 488;5. 435;6. 1303;7. 455;8. 1363;9. 1066;10. T;11. ACA	1. 0.68028;2. 470;3. 1408;4. 542;5. 486;6. 1456;7. 506;8. 1516;9. 1219;10. V;11. GTG
ERS451417_02381	1717.62.peg.2412	0.9876	0.141086	0.02469	0.02469	4	Cbelfantii_FRC0043,"Cdiphtheriae_NCTC11397","Chumireducens_DSM45392","Ctestudinoris_DSM44614"	9.96272	0.0935274	2.44145	0.103245	0.103245	2.26861	0	1	1. 0.82467;2. 37;3. 109;4. 69;5. 37;6. 109;7. 37;8. 109;9. 109;10. I;11. ATC
ERS451417_00367	1717.62.peg.366	1	0.6115	0.1223	0.1223	8	Cbelfantii_FRC0043,"Cdiphtheriae_NCTC11397","Cpseudotuberculosis_31","Cpseudotuberculosis_ATCC19410","Crouxii_FRC0190","Csilvaticum_KL0182","Culcerans_NCTC12077","Culcerans_NCTC7910"	60.5412	0.0763883	2.25344	0.99999	0.0792301	2.25226	0	7	1. 0.90612;2. 143;3. 427;4. 167;5. 152;6. 454;7. 161;8. 481;9. 364;10. R;11. AGA	1. 0.49515;2. 150;3. 448;4. 174;5. 159;6. 475;7. 168;8. 502;9. 385;10. G;11. GGC	1. 0.53305;2. 217;3. 649;4. 463;5. 226;6. 676;7. 235;8. 703;9. 586;10. N;11. AAT	1. 0.42835;2. 228;3. 682;4. 490;5. 253;6. 757;7. 270;8. 808;9. 598;10. G;11. GGA	1. 0.4051;2. 232;3. 694;4. 494;5. 257;6. 769;7. 274;8. 820;9. 610;10. P;11. CCT	1. 0.9175;2. 241;3. 721;4. 536;5. 274;6. 820;7. 283;8. 847;9. 637;10. S;11. TCG	1. 0.81227;2. 242;3. 724;4. 537;5. 275;6. 823;7. 284;8. 850;9. 640;10. T;11. ACG
ERS451417_01899	1717.62.peg.1896	1	0.735111	0.1654	0.1654	7	Cbelfantii_FRC0043,"Cdiphtheriae_NCTC11397","Cpseudotuberculosis_31","Cpseudotuberculosis_ATCC19410","Csilvaticum_KL0182","Culcerans_NCTC12077","Culcerans_NCTC7910"	1	0.0767829	3.46735	0.0811558	0.0811558	3.41846	0	4	1. 0.54581;2. 15;3. 43;4. 19;5. 15;6. 43;7. 15;8. 43;9. 43;10. S;11. AGC	1. 0.58583;2. 19;3. 55;4. 23;5. 19;6. 55;7. 19;8. 55;9. 55;10. E;11. GAG	1. 0.69044;2. 81;3. 241;4. 85;5. 81;6. 241;7. 81;8. 241;9. 241;10. T;11. ACA	1. 0.46363;2. 187;3. 559;4. 196;5. 187;6. 559;7. 187;8. 559;9. 559;10. N;11. AAT
ERS451417_01358	1717.62.peg.1366	1	1	0.2756	0.2756	8	Cbelfantii_FRC0043,"Cdiphtheriae_NCTC11397","Cmustelae_DSM45274","Cpseudotuberculosis_31","Cpseudotuberculosis_ATCC19410","Csilvaticum_KL0182","Culcerans_NCTC12077","Culcerans_NCTC7910"	1	0.177244	3.09636	0.188972	0.188972	3.1625	0	7	1. 0.60577;2. 84;3. 250;4. 126;5. 85;6. 253;7. 87;8. 259;9. 181;10. A;11. GCG	1. 0.70363;2. 112;3. 334;4. 154;5. 113;6. 337;7. 115;8. 343;9. 265;10. A;11. GCA	1. 0.73446;2. 134;3. 400;4. 179;5. 135;6. 403;7. 137;8. 409;9. 331;10. S;11. TCG	1. 0.50373;2. 136;3. 406;4. 181;5. 137;6. 409;7. 139;8. 415;9. 337;10. T;11. ACG	1. 0.46134;2. 142;3. 424;4. 187;5. 143;6. 427;7. 145;8. 433;9. 355;10. E;11. GAA	1. 0.42989;2. 148;3. 442;4. 193;5. 149;6. 445;7. 151;8. 451;9. 373;10. N;11. AAC	1. 0.50958;2. 211;3. 631;4. 259;5. 213;6. 637;7. 215;8. 643;9. 559;10. M;11. ATG
ERS451417_00246	1717.62.peg.241	1	1	0.2887	0.2887	13	Cbelfantii_FRC0043,"Cdiphtheriae_NCTC11397","Cimitans_DSM44264","Cmarinum_DSM44953","Cmustelae_DSM45274","Cpseudotuberculosis_31","Cpseudotuberculosis_ATCC19410","CriegeliiPUDD83A45","Crouxii_FRC0190","Culcerans_NCTC12077","Culcerans_NCTC7910","Cureicelerivorans_IMMIBRIV2301","Cuterequi_DSM45634"	1.55644	0.347347	1.94945	0.647861	0.348286	1.95165	0	5	1. 0.60136;2. 21;3. 61;4. 50;5. 34;6. 100;7. 34;8. 100;9. 55;10. G;11. GGT	1. 0.52952;2. 22;3. 64;4. 51;5. 35;6. 103;7. 35;8. 103;9. 58;10. A;11. GCA	1. 0.94156;2. 33;3. 97;4. 62;5. 46;6. 136;7. 46;8. 136;9. 91;10. V;11. GTT	1. 0.53162;2. 49;3. 145;4. 78;5. 62;6. 184;7. 62;8. 184;9. 139;10. A;11. GCG	1. 0.81605;2. 65;3. 193;4. 96;5. 78;6. 232;7. 78;8. 232;9. 187;10. I;11. ATA
ERS451417_01659	1717.62.peg.1666	1	1	0.3489	0.3489	10	Cbelfantii_FRC0043,"Cdiphtheriae_NCTC11397","Cefficiens_YS314","Ckutscheri_DSM20755","Cmustelae_DSM45274","Cpseudotuberculosis_31","Cpseudotuberculosis_ATCC19410","Csilvaticum_KL0182","Culcerans_NCTC12077","Culcerans_NCTC7910"	1.80541	0.15682	2.47771	0.158385	0.158385	2.47034	0	1	1. 0.75579;2. 78;3. 232;4. 102;5. 80;6. 238;7. 80;8. 238;9. 223;10. A;11. GCT
ERS451417_02175	1717.62.peg.2201	1	1	0.4624	0.4624	7	Cbelfantii_FRC0043,"Cdiphtheriae_NCTC11397","Cpseudotuberculosis_31","Cpseudotuberculosis_ATCC19410","Csilvaticum_KL0182","Culcerans_NCTC12077","Culcerans_NCTC7910"	0.955006	0.0959459	2.78498	0.0959092	0.0959092	2.77426	0	4	1. 0.43941;2. 148;3. 442;4. 192;5. 159;6. 475;7. 162;8. 484;9. 370;10. G;11. GGG	1. 0.42127;2. 231;3. 691;4. 282;5. 242;6. 724;7. 245;8. 733;9. 619;10. S;11. TCC	1. 0.52373;2. 292;3. 874;4. 343;5. 303;6. 907;7. 306;8. 916;9. 802;10. C;11. TGC	1. 0.4271;2. 349;3. 1045;4. 402;5. 360;6. 1078;7. 363;8. 1087;9. 973;10. D;11. GAT
ERS451417_00841	1717.62.peg.846	1	1	0.4745	0.4745	4	Cbelfantii_FRC0043,"Cdiphtheriae_NCTC11397","Crouxii_FRC0190","Culcerans_NCTC7910"	3.19178	0.03327	1.22991	1	0.03394	1.21869	0	6	1. 0.9707;2. 6;3. 16;4. 13;5. 6;6. 16;7. 6;8. 16;9. 13;10. A;11. GCT	1. 0.94172;2. 20;3. 58;4. 34;5. 20;6. 58;7. 20;8. 58;9. 55;10. N;11. AAC	1. 0.91248;2. 27;3. 79;4. 41;5. 27;6. 79;7. 27;8. 79;9. 76;10. S;11. TCA	1. 0.94784;2. 148;3. 442;4. 171;5. 148;6. 442;7. 153;8. 457;9. 388;10. N;11. AAC	1. 0.97137;2. 152;3. 454;4. 175;5. 152;6. 454;7. 157;8. 469;9. 400;10. K;11. AAG	1. 0.92307;2. 188;3. 562;4. 225;5. 190;6. 568;7. 193;8. 577;9. 508;10. N;11. AAC
ERS451417_01996	1717.62.peg.2000	1	1	0.6627	0.6627	7	Cbelfantii_FRC0043,"Cdiphtheriae_NCTC11397","Cpseudotuberculosis_31","Cpseudotuberculosis_ATCC19410","Csilvaticum_KL0182","Culcerans_NCTC12077","Culcerans_NCTC7910"	0.874263	0.312908	5.09204	0.754819	0.312784	5.08789	0	11	1. 0.58922;2. 85;3. 253;4. 85;5. 85;6. 253;7. 85;8. 253;9. 151;10. P;11. CCT	1. 0.50121;2. 123;3. 367;4. 123;5. 123;6. 367;7. 123;8. 367;9. 265;10. L;11. TTG	1. 0.85406;2. 146;3. 436;4. 146;5. 146;6. 436;7. 146;8. 436;9. 334;10. R;11. CGC	1. 0.83848;2. 206;3. 616;4. 219;5. 219;6. 655;7. 220;8. 658;9. 496;10. H;11. CAC	1. 0.52456;2. 236;3. 706;4. 249;5. 249;6. 745;7. 250;8. 748;9. 586;10. T;11. ACA	1. 0.86865;2. 330;3. 988;4. 345;5. 345;6. 1033;7. 346;8. 1036;9. 862;10. P;11. CCC	1. 0.84023;2. 333;3. 997;4. 348;5. 348;6. 1042;7. 349;8. 1045;9. 871;10. S;11. AGC	1. 0.83763;2. 359;3. 1075;4. 374;5. 374;6. 1120;7. 375;8. 1123;9. 949;10. K;11. AAA	1. 0.44252;2. 478;3. 1432;4. 493;5. 493;6. 1477;7. 494;8. 1480;9. 1306;10. T;11. ACG	1. 0.42531;2. 507;3. 1519;4. 522;5. 522;6. 1564;7. 523;8. 1567;9. 1393;10. S;11. AGC	1. 0.83982;2. 564;3. 1690;4. 579;5. 579;6. 1735;7. 580;8. 1738;9. 1564;10. S;11. TCG
ERS451417_01307	1717.62.peg.1315	1	1	0.6927	0.6927	37	Cargentoratense_DSM44202,"Catypicum_R2070","Caurimucosum_ATCC700975","Cbelfantii_FRC0043","Ccallunae_DSM20147","Ccamporealensis_DSM44610","Cdeserti_GIMN1010","Cdiphtheriae_NCTC11397","Cdoosanense_DSM45436","Cefficiens_YS314","Cepidermidicanis_DSM45586","Cfalsenii_DSM44353","Cglutamicum_ATCC13032","Cglycinophilum_AJ3170","Chalotolerans_YIM70093","Chumireducens_DSM45392","Cimitans_DSM44264","Cjeike…	69.0221	0.0651469	2.07635	1	0.0651856	2.07648	0	1	1. 0.4391;2. 11;3. 31;4. 11;5. 11;6. 31;7. 11;8. 31;9. 28;10. A;11. GCG
ERS451417_01392	1717.62.peg.1404	1	1	0.8843	0.8843	5	Cbelfantii_FRC0043,"Cdiphtheriae_NCTC11397","Cfalsenii_DSM44353","Cterpenotabidum_Y11","Curealyticum_DSM7109"	1.19741	0.139057	2.39877	0.999779	0.139073	2.39701	0	8	1. 0.9638;2. 50;3. 148;4. 90;5. 90;6. 268;7. 91;8. 271;9. 145;10. I;11. ATC	1. 0.62472;2. 75;3. 223;4. 115;5. 115;6. 343;7. 116;8. 346;9. 220;10. T;11. ACG	1. 0.96555;2. 139;3. 415;4. 179;5. 179;6. 535;7. 180;8. 538;9. 412;10. T;11. ACA	1. 0.96676;2. 196;3. 586;4. 236;5. 236;6. 706;7. 237;8. 709;9. 583;10. P;11. CCG	1. 0.96638;2. 207;3. 619;4. 247;5. 247;6. 739;7. 248;8. 742;9. 616;10. D;11. GAT	1. 0.96634;2. 214;3. 640;4. 254;5. 254;6. 760;7. 255;8. 763;9. 637;10. R;11. CGG	1. 0.94843;2. 220;3. 658;4. 260;5. 260;6. 778;7. 261;8. 781;9. 655;10. S;11. AGC	1. 0.89289;2. 222;3. 664;4. 262;5. 262;6. 784;7. 263;8. 787;9. 661;10. V;11. GTA
ERS451417_01903	1717.62.peg.1898	1	1	0.9989	0.9989	5	Cbelfantii_FRC0043,"Cdiphtheriae_NCTC11397","Cpseudotuberculosis_31","Cpseudotuberculosis_ATCC19410","Culcerans_NCTC7910"	1	0.207548	4.57949	1	0.207556	4.57955	0	9	1. 0.93361;2. 108;3. 322;4. 118;5. 108;6. 322;7. 112;8. 334;9. 259;10. K;11. AAA	1. 0.90791;2. 115;3. 343;4. 125;5. 115;6. 343;7. 119;8. 355;9. 280;10. G;11. GGC	1. 0.92999;2. 178;3. 532;4. 189;5. 178;6. 532;7. 182;8. 544;9. 469;10. E;11. GAA	1. 0.92853;2. 180;3. 538;4. 191;5. 180;6. 538;7. 184;8. 550;9. 475;10. V;11. GTC	1. 0.93068;2. 185;3. 553;4. 196;5. 185;6. 553;7. 189;8. 565;9. 490;10. S;11. TCA	1. 0.92272;2. 194;3. 580;4. 205;5. 194;6. 580;7. 198;8. 592;9. 517;10. E;11. GAA	1. 0.91975;2. 224;3. 670;4. 244;5. 226;6. 676;7. 235;8. 703;9. 583;10. D;11. GAT	1. 0.92779;2. 231;3. 691;4. 251;5. 233;6. 697;7. 242;8. 724;9. 604;10. D;11. GAT	1. 0.82405;2. 310;3. 928;4. 330;5. 312;6. 934;7. 321;8. 961;9. 841;10. V;11. GTT
ERS451417_01833	1717.62.peg.1836	1	1	1	1	8	Cbelfantii_FRC0043,"Cdiphtheriae_NCTC11397","Ckutscheri_DSM20755","Cpseudotuberculosis_31","Cpseudotuberculosis_ATCC19410","Csilvaticum_KL0182","Culcerans_NCTC12077","Culcerans_NCTC7910"	1	0.107925	2.39885	1	0.107925	2.39885	0	3	1. 0.66631;2. 73;3. 217;4. 92;5. 92;6. 274;7. 92;8. 274;9. 217;10. A;11. GCG	1. 0.59395;2. 128;3. 382;4. 147;5. 147;6. 439;7. 147;8. 439;9. 382;10. T;11. ACG	1. 0.56983;2. 234;3. 700;4. 256;5. 256;6. 766;7. 256;8. 766;9. 697;10. S;11. TCT
ERS451417_01959	1717.62.peg.1959	1	1	1	1	37	Cargentoratense_DSM44202,"Catypicum_R2070","Caurimucosum_ATCC700975","Cbelfantii_FRC0043","Ccallunae_DSM20147","Ccamporealensis_DSM44610","Cdeserti_GIMN1010","Cdiphtheriae_NCTC11397","Cdoosanense_DSM45436","Cefficiens_YS314","Cepidermidicanis_DSM45586","Cfalsenii_DSM44353","Cglutamicum_ATCC13032","Cglycinophilum_AJ3170","Chalotolerans_YIM70093","Chumireducens_DSM45392","Cimitans_DSM44264","Cjeike…	0.999922	0.101924	1.87054	0.99999	0.101914	1.87058	0	2	1. 0.93542;2. 77;3. 229;4. 96;5. 96;6. 286;7. 113;8. 337;9. 196;10. D;11. GAC	1. 0.91041;2. 188;3. 562;4. 208;5. 208;6. 622;7. 229;8. 685;9. 487;10. N;11. AAC
ERS451417_00919	1717.62.peg.926	1	1	1	1	5	Caurimucosum_ATCC700975,"Cbelfantii_FRC0043","Cdiphtheriae_NCTC11397","Cmaris_DSM45190","Csingulare_IBSB52218"	1	0.172969	1.88848	1	0.172969	1.88847	0	12	1. 0.5753;2. 54;3. 160;4. 54;5. 54;6. 160;7. 54;8. 160;9. 31;10. A;11. GCG	1. 0.89044;2. 131;3. 391;4. 131;5. 131;6. 391;7. 131;8. 391;9. 262;10. S;11. TCC	1. 0.86472;2. 142;3. 424;4. 142;5. 142;6. 424;7. 142;8. 424;9. 295;10. E;11. GAA	1. 0.59291;2. 573;3. 1717;4. 602;5. 575;6. 1723;7. 581;8. 1741;9. 1546;10. A;11. GCC	1. 0.82051;2. 574;3. 1720;4. 603;5. 576;6. 1726;7. 582;8. 1744;9. 1549;10. A;11. GCA	1. 0.78715;2. 577;3. 1729;4. 606;5. 579;6. 1735;7. 585;8. 1753;9. 1558;10. S;11. AGT	1. 0.91188;2. 653;3. 1957;4. 691;5. 655;6. 1963;7. 661;8. 1981;9. 1786;10. R;11. AGG	1. 0.88679;2. 708;3. 2122;4. 800;5. 710;6. 2128;7. 716;8. 2146;9. 1951;10. K;11. AAA	1. 0.70948;2. 793;3. 2377;4. 931;5. 798;6. 2392;7. 804;8. 2410;9. 2185;10. I;11. ATA	1. 0.83236;2. 814;3. 2440;4. 953;5. 819;6. 2455;7. 825;8. 2473;9. 2248;10. G;11. GGT	1. 0.54448;2. 911;3. 2731;4. 1076;5. 916;6. 2746;7. 922;8. 2764;9. 2503;10. I;11. ATT	1. 0.55192;2. 943;3. 2827;4. 1121;5. 948;6. 2842;7. 954;8. 2860;9. 2596;10. N;11. AAC
ERS451417_02226	1717.62.peg.2251	1	1	1	1	6	Cbelfantii_FRC0043,"Cdiphtheriae_NCTC11397","Cpseudotuberculosis_31","Cpseudotuberculosis_ATCC19410","Culcerans_NCTC12077","Culcerans_NCTC7910"	1	0.113431	2.63151	1	0.113431	2.6315	0	5	1. 0.76403;2. 27;3. 79;4. 69;5. 32;6. 94;7. 32;8. 94;9. 61;10. E;11. GAG	1. 0.87671;2. 30;3. 88;4. 72;5. 35;6. 103;7. 35;8. 103;9. 70;10. S;11. TCC	1. 0.70128;2. 38;3. 112;4. 80;5. 43;6. 127;7. 43;8. 127;9. 94;10. P;11. CCG	1. 0.7495;2. 49;3. 145;4. 94;5. 54;6. 160;7. 60;8. 178;9. 109;10. N;11. AAT	1. 0.82405;2. 53;3. 157;4. 98;5. 58;6. 172;7. 64;8. 190;9. 121;10. A;11. GCG
ERS451417_02193	1717.62.peg.2219	1	1	1	1	4	Cargentoratense_DSM44202,"Cbelfantii_FRC0043","Cdiphtheriae_NCTC11397","Clactis_RW25"	1	0.147256	3.08747	1	0.147256	3.08747	0	4	1. 0.72486;2. 105;3. 313;4. 105;5. 105;6. 313;7. 105;8. 313;9. 217;10. T;11. ACG	1. 0.48423;2. 136;3. 406;4. 136;5. 136;6. 406;7. 136;8. 406;9. 310;10. H;11. CAC	1. 0.63366;2. 144;3. 430;4. 144;5. 144;6. 430;7. 144;8. 430;9. 334;10. I;11. ATC	1. 0.51551;2. 191;3. 571;4. 191;5. 191;6. 571;7. 191;8. 571;9. 475;10. A;11. GCG
ERS451417_02198	1717.62.peg.2224	1	1	1	1	5	Cbelfantii_FRC0043,"Cdiphtheriae_NCTC11397","Chumireducens_DSM45392","Cmarinum_DSM44953","Cmaris_DSM45190"	1	0.154448	1.88322	1	0.154448	1.88322	0	10	1. 0.40427;2. 77;3. 229;4. 113;5. 81;6. 241;7. 85;8. 253;9. 193;10. A;11. GCC	1. 0.70778;2. 92;3. 274;4. 128;5. 96;6. 286;7. 100;8. 298;9. 238;10. T;11. ACG	1. 0.40071;2. 104;3. 310;4. 140;5. 108;6. 322;7. 112;8. 334;9. 274;10. A;11. GCA	1. 0.4881;2. 112;3. 334;4. 148;5. 116;6. 346;7. 120;8. 358;9. 298;10. A;11. GCA	1. 0.75163;2. 133;3. 397;4. 169;5. 137;6. 409;7. 141;8. 421;9. 361;10. V;11. GTT	1. 0.43706;2. 207;3. 619;4. 252;5. 211;6. 631;7. 215;8. 643;9. 583;10. A;11. GCC	1. 0.43463;2. 209;3. 625;4. 254;5. 213;6. 637;7. 217;8. 649;9. 589;10. L;11. CTT	1. 0.42515;2. 222;3. 664;4. 270;5. 226;6. 676;7. 230;8. 688;9. 628;10. V;11. GTA	1. 0.83277;2. 309;3. 925;4. 358;5. 313;6. 937;7. 317;8. 949;9. 889;10. S;11. AGC	1. 0.40442;2. 370;3. 1108;4. 427;5. 374;6. 1120;7. 378;8. 1132;9. 1072;10. V;11. GTC
ERS451417_02188	1717.62.peg.2214	1	1	1	1	4	Cargentoratense_DSM44202,"Cbelfantii_FRC0043","Cdiphtheriae_NCTC11397","Clactis_RW25"	0.928752	0.164196	3.30332	0.16585	0.16585	3.32252	0	1	1. 0.57793;2. 108;3. 322;4. 123;5. 108;6. 322;7. 109;8. 325;9. 295;10. S;11. TCC
ERS451417_02192	1717.62.peg.2218	1	1	1	1	4	Cargentoratense_DSM44202,"Cbelfantii_FRC0043","Cdiphtheriae_NCTC11397","Clactis_RW25"	1	0.160504	2.49022	1	0.160504	2.49022	0	5	1. 0.84848;2. 135;3. 403;4. 144;5. 140;6. 418;7. 140;8. 418;9. 367;10. R;11. CGC	1. 0.80137;2. 206;3. 616;4. 216;5. 211;6. 631;7. 211;8. 631;9. 580;10. A;11. GCA	1. 0.7287;2. 294;3. 880;4. 305;5. 299;6. 895;7. 299;8. 895;9. 844;10. S;11. TCC	1. 0.46998;2. 448;3. 1342;4. 462;5. 453;6. 1357;7. 453;8. 1357;9. 1306;10. E;11. GAG	1. 0.48793;2. 495;3. 1483;4. 509;5. 500;6. 1498;7. 500;8. 1498;9. 1447;10. V;11. GTT
ERS451417_00074	1717.62.peg.71	1	1	1	1	4	Cbelfantii_FRC0043,"Cdiphtheriae_NCTC11397","Csimulans_PES1","Curealyticum_DSM7109"	1	0.398864	1.61055	1	0.398864	1.61055	0	5	1. 0.87586;2. 56;3. 166;4. 70;5. 56;6. 166;7. 59;8. 175;9. 130;10. Q;11. CAG	1. 0.51965;2. 79;3. 235;4. 93;5. 79;6. 235;7. 82;8. 244;9. 199;10. S;11. AGC	1. 0.48383;2. 130;3. 388;4. 153;5. 134;6. 400;7. 133;8. 397;9. 346;10. V;11. GTC	1. 0.85289;2. 195;3. 583;4. 218;5. 199;6. 595;7. 199;8. 595;9. 538;10. D;11. GAC	1. 0.88702;2. 223;3. 667;4. 246;5. 227;6. 679;7. 227;8. 679;9. 622;10. Q;11. CAG
ERS451417_01866	1717.62.peg.1868	1	1	1	1	31	Cargentoratense_DSM44202,"Caurimucosum_ATCC700975","Cbelfantii_FRC0043","Ccallunae_DSM20147","Ccamporealensis_DSM44610","Cdeserti_GIMN1010","Cdiphtheriae_NCTC11397","Cdoosanense_DSM45436","Cefficiens_YS314","Cepidermidicanis_DSM45586","Cfalsenii_DSM44353","Cglutamicum_ATCC13032","Cglycinophilum_AJ3170","Chalotolerans_YIM70093","Chumireducens_DSM45392","Cjeikeium_K41","Ckroppenstedtii_DSM44385","C…	0.999854	0.17714	1.47319	1	0.17714	1.47319	0	1	1. 0.8437;2. 64;3. 190;4. 80;5. 76;6. 226;7. 86;8. 256;9. 157;10. N;11. AAC
ERS451417_01604	1717.62.peg.1613	1	1	1	1	7	Cbelfantii_FRC0043,"Cdiphtheriae_NCTC11397","Cpseudotuberculosis_31","Cpseudotuberculosis_ATCC19410","Csilvaticum_KL0182","Culcerans_NCTC12077","Culcerans_NCTC7910"	1	0.365824	5.05115	1	0.365824	5.05114	0	5	1. 0.50894;2. 24;3. 70;4. 59;5. 24;6. 70;7. 24;8. 70;9. 46;10. V;11. GTG	1. 0.48861;2. 38;3. 112;4. 74;5. 38;6. 112;7. 38;8. 112;9. 88;10. I;11. ATC	1. 0.56893;2. 103;3. 307;4. 167;5. 103;6. 307;7. 103;8. 307;9. 283;10. Q;11. CAA	1. 0.4361;2. 123;3. 367;4. 187;5. 123;6. 367;7. 123;8. 367;9. 343;10. A;11. GCT	1. 0.8767;2. 142;3. 424;4. 215;5. 142;6. 424;7. 142;8. 424;9. 400;10. H;11. CAT
ERS451417_02390	1717.62.peg.2422	1	1	1	1	30	Catypicum_R2070,"Caurimucosum_ATCC700975","Cbelfantii_FRC0043","Ccallunae_DSM20147","Ccamporealensis_DSM44610","Cdeserti_GIMN1010","Cdiphtheriae_NCTC11397","Cdoosanense_DSM45436","Cefficiens_YS314","Cglutamicum_ATCC13032","Chalotolerans_YIM70093","Chumireducens_DSM45392","Ckroppenstedtii_DSM44385","Ckutscheri_DSM20755","Clactis_RW25","Cmarinum_DSM44953","Cmaris_DSM45190","Cmustelae_DSM45274","Cps…	1	0.118776	1.64949	1	0.118776	1.64949	0	3	1. 0.94684;2. 19;3. 55;4. 46;5. 26;6. 76;7. 36;8. 106;9. 52;10. I;11. ATA	1. 0.9467;2. 64;3. 190;4. 105;5. 71;6. 211;7. 81;8. 241;9. 187;10. I;11. ATA	1. 0.51358;2. 166;3. 496;4. 232;5. 181;6. 541;7. 195;8. 583;9. 412;10. T;11. ACG
ERS451417_02383	1717.62.peg.2414	1	1	1	1	23	Catypicum_R2070,"Caurimucosum_ATCC700975","Cbelfantii_FRC0043","Ccallunae_DSM20147","Ccamporealensis_DSM44610","Cdeserti_GIMN1010","Cdiphtheriae_NCTC11397","Cefficiens_YS314","Cfalsenii_DSM44353","Cglutamicum_ATCC13032","Cglycinophilum_AJ3170","Chumireducens_DSM45392","Cimitans_DSM44264","Cjeikeium_K41","Ckroppenstedtii_DSM44385","Clactis_RW25","Cmarinum_DSM44953","Cmaris_DSM45190","Csingulare_IB…	1	0.106091	1.38748	1	0.106091	1.38749	0	6	1. 0.46933;2. 56;3. 166;4. 112;5. 90;6. 268;7. 134;8. 400;9. 97;10. S;11. TCC	1. 0.89475;2. 66;3. 196;4. 122;5. 100;6. 298;7. 144;8. 430;9. 127;10. L;11. TTG	1. 0.55211;2. 163;3. 487;4. 222;5. 200;6. 598;7. 244;8. 730;9. 409;10. T;11. ACG	1. 0.52479;2. 205;3. 613;4. 264;5. 242;6. 724;7. 286;8. 856;9. 535;10. N;11. AAT	1. 0.78523;2. 218;3. 652;4. 277;5. 255;6. 763;7. 299;8. 895;9. 574;10. A;11. GCG	1. 0.89143;2. 262;3. 784;4. 321;5. 299;6. 895;7. 343;8. 1027;9. 703;10. T;11. ACC
ERS451417_02333	1717.62.peg.2360	1	1	1	1	4	Cbelfantii_FRC0043,"Cdiphtheriae_NCTC11397","Ckutscheri_DSM20755","Culcerans_NCTC12077"	1	0.15215	2.34687	1	0.15215	2.34687	0	8	1. 0.58618;2. 15;3. 43;4. 23;5. 18;6. 52;7. 18;8. 52;9. 22;10. A;11. GCA	1. 0.63395;2. 33;3. 97;4. 42;5. 37;6. 109;7. 37;8. 109;9. 70;10. A;11. GCT	1. 0.88818;2. 51;3. 151;4. 61;5. 56;6. 166;7. 56;8. 166;9. 121;10. F;11. TTC	1. 0.75213;2. 126;3. 376;4. 136;5. 131;6. 391;7. 131;8. 391;9. 340;10. S;11. AGT	1. 0.66312;2. 187;3. 559;4. 206;5. 192;6. 574;7. 192;8. 574;9. 517;10. E;11. GAG	1. 0.84765;2. 225;3. 673;4. 247;5. 230;6. 688;7. 230;8. 688;9. 616;10. T;11. ACT	1. 0.68225;2. 233;3. 697;4. 255;5. 238;6. 712;7. 238;8. 712;9. 640;10. I;11. ATT	1. 0.5541;2. 327;3. 979;4. 354;5. 332;6. 994;7. 332;8. 994;9. 922;10. K;11. AAG
ERS451417_00131	1717.62.peg.130	1	1	1	1	8	Cbelfantii_FRC0043,"Cdiphtheriae_NCTC11397","Cpseudotuberculosis_31","Cpseudotuberculosis_ATCC19410","Crouxii_FRC0190","Csilvaticum_KL0182","Culcerans_NCTC12077","Culcerans_NCTC7910"	1	0.327889	5.33278	1	0.327889	5.3328	0	2	1. 0.89714;2. 14;3. 40;4. 23;5. 14;6. 40;7. 14;8. 40;9. 13;10. N;11. AAC	1. 0.73849;2. 30;3. 88;4. 41;5. 30;6. 88;7. 30;8. 88;9. 61;10. T;11. ACA
ERS451417_02171	1717.62.peg.2197	1	1	1	1	8	Cbelfantii_FRC0043,"Cdiphtheriae_NCTC11397","Ckutscheri_DSM20755","Cpseudotuberculosis_31","Cpseudotuberculosis_ATCC19410","Csilvaticum_KL0182","Culcerans_NCTC12077","Culcerans_NCTC7910"	1	0.0867936	1.65983	1	0.0867936	1.65983	0	1	1. 0.44812;2. 112;3. 334;4. 139;5. 125;6. 373;7. 128;8. 382;9. 259;10. I;11. ATT
ERS451417_01989	1717.62.peg.1990	1	1	1	1	7	Cbelfantii_FRC0043,"Cdiphtheriae_NCTC11397","Cpseudotuberculosis_31","Cpseudotuberculosis_ATCC19410","Csilvaticum_KL0182","Culcerans_NCTC12077","Culcerans_NCTC7910"	1	0.0916315	3.28325	1	0.0916315	3.28325	0	2	1. 0.54401;2. 114;3. 340;4. 154;5. 146;6. 436;7. 146;8. 436;9. 337;10. A;11. GCC	1. 0.82286;2. 153;3. 457;4. 195;5. 185;6. 553;7. 185;8. 553;9. 454;10. A;11. GCC
ERS451417_01607	1717.62.peg.1616	1	1	1	1	5	Cbelfantii_FRC0043,"Cdiphtheriae_NCTC11397","Cpseudotuberculosis_ATCC19410","Culcerans_NCTC12077","Culcerans_NCTC7910"	1	0.247044	3.04825	1	0.247044	3.04825	0	11	1. 0.7934;2. 12;3. 34;4. 28;5. 19;6. 55;7. 19;8. 55;9. 28;10. S;11. TCC	1. 0.43979;2. 18;3. 52;4. 34;5. 25;6. 73;7. 25;8. 73;9. 46;10. T;11. ACC	1. 0.7792;2. 49;3. 145;4. 73;5. 59;6. 175;7. 60;8. 178;9. 97;10. I;11. ATA	1. 0.53657;2. 76;3. 226;4. 103;5. 86;6. 256;7. 87;8. 259;9. 178;10. T;11. ACC	1. 0.87186;2. 96;3. 286;4. 131;5. 110;6. 328;7. 112;8. 334;9. 211;10. H;11. CAC	1. 0.53964;2. 105;3. 313;4. 142;5. 119;6. 355;7. 121;8. 361;9. 238;10. D;11. GAT	1. 0.43564;2. 111;3. 331;4. 148;5. 125;6. 373;7. 127;8. 379;9. 256;10. G;11. GGC	1. 0.44747;2. 113;3. 337;4. 176;5. 127;6. 379;7. 129;8. 385;9. 262;10. D;11. GAT	1. 0.51572;2. 151;3. 451;4. 228;5. 165;6. 493;7. 167;8. 499;9. 376;10. D;11. GAT	1. 0.40267;2. 185;3. 553;4. 263;5. 199;6. 595;7. 201;8. 601;9. 478;10. G;11. GGC	1. 0.54529;2. 196;3. 586;4. 274;5. 210;6. 628;7. 212;8. 634;9. 511;10. M;11. ATG
ERS451417_01464	1717.62.peg.1474	1	1	1	1	9	Cbelfantii_FRC0043,"Cdiphtheriae_NCTC11397","Ckutscheri_DSM20755","Cmustelae_DSM45274","Cpseudotuberculosis_31","Cpseudotuberculosis_ATCC19410","Csilvaticum_KL0182","Culcerans_NCTC12077","Culcerans_NCTC7910"	1	0.0893959	2.13582	1	0.0893959	2.13586	0	7	1. 0.69325;2. 37;3. 109;4. 55;5. 41;6. 121;7. 42;8. 124;9. 91;10. I;11. ATC	1. 0.53172;2. 54;3. 160;4. 73;5. 58;6. 172;7. 59;8. 175;9. 142;10. R;11. CGC	1. 0.52563;2. 90;3. 268;4. 109;5. 94;6. 280;7. 95;8. 283;9. 250;10. T;11. ACT	1. 0.57014;2. 127;3. 379;4. 146;5. 131;6. 391;7. 132;8. 394;9. 361;10. L;11. CTT	1. 0.84552;2. 136;3. 406;4. 155;5. 140;6. 418;7. 141;8. 421;9. 388;10. T;11. ACG	1. 0.78106;2. 146;3. 436;4. 166;5. 150;6. 448;7. 151;8. 451;9. 418;10. H;11. CAT	1. 0.50754;2. 162;3. 484;4. 182;5. 166;6. 496;7. 167;8. 499;9. 466;10. I;11. ATC
ERS451417_01988	1717.62.peg.1989	1	1	1	1	14	Caurimucosum_ATCC700975,"Cbelfantii_FRC0043","Ccamporealensis_DSM44610","Cdiphtheriae_NCTC11397","Cimitans_DSM44264","Cmustelae_DSM45274","CriegeliiPUDD83A45","Csilvaticum_KL0182","Csimulans_PES1","Csingulare_IBSB52218","Culcerans_NCTC12077","Culcerans_NCTC7910","Cureicelerivorans_IMMIBRIV2301","Cvitaeruminis_DSM20294"	1	0.305237	1.89252	1	0.305237	1.89252	0	1	1. 0.92168;2. 23;3. 67;4. 24;5. 24;6. 70;7. 24;8. 70;9. 67;10. L;11. CTC
ERS451417_01947	1717.62.peg.1947	1	1	1	1	19	Cbelfantii_FRC0043,"Ccallunae_DSM20147","Cdeserti_GIMN1010","Cdiphtheriae_NCTC11397","Cefficiens_YS314","Cepidermidicanis_DSM45586","Cglutamicum_ATCC13032","Chalotolerans_YIM70093","Ckroppenstedtii_DSM44385","Clactis_RW25","Cmarinum_DSM44953","Cmaris_DSM45190","Cmustelae_DSM45274","Cpseudotuberculosis_31","Cpseudotuberculosis_ATCC19410","Ctestudinoris_DSM44614","Culcerans_NCTC12077","Culcerans_NC…	1	0.196909	1.48452	1	0.196909	1.48452	0	1	1. 0.55038;2. 124;3. 370;4. 143;5. 135;6. 403;7. 138;8. 412;9. 334;10. I;11. ATC
ERS451417_01933	1717.62.peg.1930	1	1	1	1	8	Cbelfantii_FRC0043,"Cdiphtheriae_NCTC11397","Cpseudotuberculosis_31","Cpseudotuberculosis_ATCC19410","Csilvaticum_KL0182","Culcerans_NCTC12077","Culcerans_NCTC7910","Cvitaeruminis_DSM20294"	0.999616	0.0475022	2.19799	1	0.0475122	2.19794	0	5	1. 0.67903;2. 49;3. 145;4. 75;5. 49;6. 145;7. 69;8. 205;9. 52;10. T;11. ACT	1. 0.74451;2. 52;3. 154;4. 78;5. 52;6. 154;7. 72;8. 214;9. 61;10. S;11. AGC	1. 0.5037;2. 72;3. 214;4. 98;5. 72;6. 214;7. 92;8. 274;9. 121;10. A;11. GCG	1. 0.49909;2. 78;3. 232;4. 104;5. 78;6. 232;7. 98;8. 292;9. 139;10. V;11. GTC	1. 0.82683;2. 81;3. 241;4. 107;5. 81;6. 241;7. 101;8. 301;9. 148;10. I;11. ATA
ERS451417_00631	1717.62.peg.635	NA	NA	NA	5.259e-10	14	Cargentoratense_DSM44202,"Cbelfantii_FRC0043","Ccallunae_DSM20147","Cdiphtheriae_NCTC11397","Cefficiens_YS314","Chalotolerans_YIM70093","Ckutscheri_DSM20755","Cmustelae_DSM45274","Cpseudotuberculosis_ATCC19410","Crouxii_FRC0190","Csilvaticum_KL0182","Ctestudinoris_DSM44614","Culcerans_NCTC7910","Cvitaeruminis_DSM20294"	0.0962558	0.0812695	1.78378	1	0.0798421	1.81431	2050	4	1. 0.43884;2. 311;3. 931;4. 355;5. 333;6. 997;7. 361;8. 1081;9. 706;10. F;11. TTT	1. 0.43404;2. 321;3. 961;4. 365;5. 343;6. 1027;7. 371;8. 1111;9. 736;10. N;11. AAT	1. 0.53447;2. 531;3. 1591;4. 636;5. 562;6. 1684;7. 593;8. 1777;9. 1222;10. T;11. ACA	1. 0.47514;2. 534;3. 1600;4. 639;5. 565;6. 1693;7. 596;8. 1786;9. 1231;10. M;11. ATG
ERS451417_01740	1717.62.peg.1744	NA	NA	NA	2.715e-06	6	Cdiphtheriae_NCTC11397,"Cpseudotuberculosis_31","Cpseudotuberculosis_ATCC19410","Csilvaticum_KL0182","Culcerans_NCTC12077","Culcerans_NCTC7910"	11.5599	0.167178	3.26629	0.404266	0.165121	3.02194	6144	106	1. 0.97396;2. 25;3. 73;4. 46;5. 30;6. 88;7. 45;8. 133;9. 4;10. L;11. CTC	1. 0.95812;2. 31;3. 91;4. 52;5. 36;6. 106;7. 51;8. 151;9. 22;10. N;11. AAT	1. 0.96676;2. 57;3. 169;4. 78;5. 62;6. 184;7. 77;8. 229;9. 94;10. K;11. AAA	1. 0.92602;2. 77;3. 229;4. 100;5. 82;6. 244;7. 97;8. 289;9. 154;10. A;11. GCG	1. 0.96275;2. 78;3. 232;4. 101;5. 83;6. 247;7. 98;8. 292;9. 157;10. K;11. AAG	1. 0.97399;2. 82;3. 244;4. 107;5. 87;6. 259;7. 102;8. 304;9. 169;10. E;11. GAG	1. 0.9455;2. 86;3. 256;4. 111;5. 91;6. 271;7. 106;8. 316;9. 181;10. R;11. CGC	1. 0.97476;2. 101;3. 301;4. 132;5. 106;6. 316;7. 121;8. 361;9. 226;10. T;11. ACT	1. 0.90936;2. 105;3. 313;4. 136;5. 110;6. 328;7. 125;8. 373;9. 238;10. G;11. GGC	1. 0.91117;2. 155;3. 463;4. 188;5. 162;6. 484;7. 178;8. 532;9. 367;10. G;11. GGC	1. 0.96193;2. 174;3. 520;4. 207;5. 181;6. 541;7. 197;8. 589;9. 418;10. L;11. TTG	1. 0.98149;2. 188;3. 562;4. 221;5. 195;6. 583;7. 211;8. 631;9. 460;10. Q;11. CAG	1. 0.92107;2. 193;3. 577;4. 226;5. 200;6. 598;7. 216;8. 646;9. 475;10. K;11. AAA	1. 0.93868;2. 207;3. 619;4. 240;5. 214;6. 640;7. 230;8. 688;9. 517;10. T;11. ACT	1. 0.95334;2. 253;3. 757;4. 288;5. 260;6. 778;7. 281;8. 841;9. 637;10. G;11. GGT	1. 0.97519;2. 258;3. 772;4. 298;5. 270;6. 808;7. 286;8. 856;9. 652;10. E;11. GAA	1. 0.93803;2. 266;3. 796;4. 307;5. 278;6. 832;7. 294;8. 880;9. 676;10. T;11. ACG	1. 0.95936;2. 273;3. 817;4. 315;5. 286;6. 856;7. 302;8. 904;9. 697;10. R;11. CGT	1. 0.96369;2. 315;3. 943;4. 357;5. 328;6. 982;7. 344;8. 1030;9. 823;10. E;11. GAG	1. 0.97597;2. 332;3. 994;4. 374;5. 345;6. 1033;7. 361;8. 1081;9. 874;10. K;11. AAG	1. 0.9871;2. 338;3. 1012;4. 380;5. 351;6. 1051;7. 367;8. 1099;9. 892;10. P;11. CCT	1. 0.96982;2. 340;3. 1018;4. 382;5. 353;6. 1057;7. 369;8. 1105;9. 898;10. T;11. ACT	1. 0.9314;2. 341;3. 1021;4. 383;5. 354;6. 1060;7. 370;8. 1108;9. 901;10. F;11. TTT	1. 0.95282;2. 359;3. 1075;4. 401;5. 372;6. 1114;7. 388;8. 1162;9. 949;10. R;11. CGA	1. 0.98571;2. 367;3. 1099;4. 409;5. 380;6. 1138;7. 396;8. 1186;9. 973;10. P;11. CCT	1. 0.9305;2. 371;3. 1111;4. 413;5. 384;6. 1150;7. 400;8. 1198;9. 985;10. A;11. GCT	1. 0.91806;2. 374;3. 1120;4. 416;5. 387;6. 1159;7. 403;8. 1207;9. 994;10. K;11. AAG	1. 0.96612;2. 379;3. 1135;4. 421;5. 392;6. 1174;7. 408;8. 1222;9. 1009;10. N;11. AAT	1. 0.96553;2. 380;3. 1138;4. 422;5. 393;6. 1177;7. 409;8. 1225;9. 1012;10. T;11. ACG	1. 0.95716;2. 382;3. 1144;4. 424;5. 395;6. 1183;7. 411;8. 1231;9. 1018;10. K;11. AAA	1. 0.90574;2. 418;3. 1252;4. 475;5. 431;6. 1291;7. 449;8. 1345;9. 1060;10. V;11. GTA	1. 0.92926;2. 422;3. 1264;4. 479;5. 435;6. 1303;7. 453;8. 1357;9. 1072;10. K;11. AAA	1. 0.97123;2. 428;3. 1282;4. 485;5. 441;6. 1321;7. 459;8. 1375;9. 1090;10. V;11. GTC	1. 0.95933;2. 438;3. 1312;4. 495;5. 451;6. 1351;7. 469;8. 1405;9. 1120;10. M;11. ATG
ERS451417_00043	1717.62.peg.39	NA	NA	NA	3.163e-06	4	Ccamporealensis_DSM44610,"Cdiphtheriae_NCTC11397","Clactis_RW25","Cvitaeruminis_DSM20294"	3.27326	0.176796	1.54793	0.189243	0.189243	1.57988	4352	0
ERS451417_01673	1717.62.peg.1680	NA	NA	NA	8.872e-06	5	Cdiphtheriae_NCTC11397,"Cglycinophilum_AJ3170","Ckroppenstedtii_DSM44385","Cterpenotabidum_Y11","Cvitaeruminis_DSM20294"	7.19396	0.115429	1.09364	0.114308	0.114308	1.05689	4096	1	1. 0.46606;2. 196;3. 586;4. 254;5. 220;6. 658;7. 237;8. 709;9. 496;10. A;11. GCC
ERS451417_00150	1717.62.peg.147	NA	NA	NA	7.586e-05	3	Cbelfantii_FRC0043,"Cdiphtheriae_NCTC11397","Crouxii_FRC0190"	25.8515	0.120326	3.51602	0.168443	0.123063	3.34785	128	15	1. 0.47039;2. 190;3. 568;4. 245;5. 245;6. 733;7. 259;8. 775;9. 568;10. A;11. GCG	1. 0.4777;2. 191;3. 571;4. 246;5. 246;6. 736;7. 260;8. 778;9. 571;10. S;11. TCG	1. 0.51824;2. 192;3. 574;4. 247;5. 247;6. 739;7. 261;8. 781;9. 574;10. Q;11. CAG	1. 0.87076;2. 198;3. 592;4. 253;5. 253;6. 757;7. 267;8. 799;9. 592;10. G;11. GGG	1. 0.49989;2. 199;3. 595;4. 254;5. 254;6. 760;7. 268;8. 802;9. 595;10. P;11. CCG	1. 0.47942;2. 204;3. 610;4. 259;5. 259;6. 775;7. 273;8. 817;9. 610;10. R;11. CGG	1. 0.44043;2. 205;3. 613;4. 260;5. 260;6. 778;7. 274;8. 820;9. 613;10. P;11. CCG	1. 0.43897;2. 206;3. 616;4. 261;5. 261;6. 781;7. 275;8. 823;9. 616;10. G;11. GGG	1. 0.49837;2. 207;3. 619;4. 262;5. 262;6. 784;7. 276;8. 826;9. 619;10. A;11. GCG	1. 0.91219;2. 209;3. 625;4. 264;5. 264;6. 790;7. 278;8. 832;9. 625;10. S;11. TCG	1. 0.54311;2. 214;3. 640;4. 269;5. 269;6. 805;7. 283;8. 847;9. 640;10. A;11. GCT	1. 0.84098;2. 216;3. 646;4. 271;5. 271;6. 811;7. 285;8. 853;9. 646;10. A;11. GCG	1. 0.46919;2. 241;3. 721;4. 300;5. 296;6. 886;7. 310;8. 928;9. 721;10. H;11. CAT	1. 0.63402;2. 260;3. 778;4. 320;5. 315;6. 943;7. 329;8. 985;9. 778;10. I;11. ATT	1. 0.48121;2. 372;3. 1114;4. 449;5. 427;6. 1279;7. 441;8. 1321;9. 1114;10. E;11. GAG
ERS451417_00422	1717.62.peg.422	NA	NA	NA	0.0002644	13	Catypicum_R2070,"Ccamporealensis_DSM44610","Cdiphtheriae_NCTC11397","Cdoosanense_DSM45436","Cefficiens_YS314","Cglutamicum_ATCC13032","Chalotolerans_YIM70093","Cmarinum_DSM44953","Cmaris_DSM45190","Csimulans_PES1","Ctestudinoris_DSM44614","Cuterequi_DSM45634","Cvitaeruminis_DSM20294"	3.47706	0.144694	1.90923	0.174158	0.145267	1.90068	6144	24	1. 0.57578;2. 285;3. 853;4. 320;5. 301;6. 901;7. 341;8. 1021;9. 88;10. T;11. ACC	1. 0.86937;2. 343;3. 1027;4. 379;5. 359;6. 1075;7. 399;8. 1195;9. 262;10. G;11. GGG	1. 0.79227;2. 382;3. 1144;4. 425;5. 403;6. 1207;7. 443;8. 1327;9. 358;10. Y;11. TAT	1. 0.69576;2. 492;3. 1474;4. 555;5. 531;6. 1591;7. 578;8. 1732;9. 631;10. Q;11. CAG	1. 0.72444;2. 500;3. 1498;4. 563;5. 539;6. 1615;7. 586;8. 1756;9. 655;10. S;11. TCC	1. 0.68526;2. 521;3. 1561;4. 584;5. 560;6. 1678;7. 607;8. 1819;9. 715;10. M;11. ATG	1. 0.92819;2. 568;3. 1702;4. 631;5. 607;6. 1819;7. 654;8. 1960;9. 856;10. S;11. AGT	1. 0.90426;2. 605;3. 1813;4. 668;5. 644;6. 1930;7. 691;8. 2071;9. 967;10. V;11. GTA	1. 0.76341;2. 620;3. 1858;4. 683;5. 659;6. 1975;7. 706;8. 2116;9. 1012;10. G;11. GGT	1. 0.90581;2. 640;3. 1918;4. 703;5. 679;6. 2035;7. 726;8. 2176;9. 1072;10. S;11. TCT	1. 0.63338;2. 642;3. 1924;4. 705;5. 681;6. 2041;7. 728;8. 2182;9. 1078;10. N;11. AAT	1. 0.80259;2. 707;3. 2119;4. 770;5. 746;6. 2236;7. 793;8. 2377;9. 1273;10. S;11. TCA	1. 0.96225;2. 754;3. 2260;4. 817;5. 793;6. 2377;7. 840;8. 2518;9. 1414;10. S;11. TCT	1. 0.76715;2. 758;3. 2272;4. 821;5. 797;6. 2389;7. 844;8. 2530;9. 1426;10. S;11. AGC	1. 0.63039;2. 867;3. 2599;4. 934;5. 907;6. 2719;7. 954;8. 2860;9. 1747;10. V;11. GTC	1. 0.5277;2. 889;3. 2665;4. 956;5. 929;6. 2785;7. 976;8. 2926;9. 1813;10. A;11. GCT	1. 0.66967;2. 890;3. 2668;4. 957;5. 930;6. 2788;7. 977;8. 2929;9. 1816;10. V;11. GTC	1. 0.96813;2. 911;3. 2731;4. 978;5. 951;6. 2851;7. 998;8. 2992;9. 1879;10. S;11. TCT	1. 0.4159;2. 936;3. 2806;4. 1003;5. 976;6. 2926;7. 1023;8. 3067;9. 1954;10. V;11. GTC	1. 0.96622;2. 955;3. 2863;4. 1023;5. 996;6. 2986;7. 1046;8. 3136;9. 1996;10. S;11. TCT	1. 0.6376;2. 975;3. 2923;4. 1043;5. 1016;6. 3046;7. 1066;8. 3196;9. 2056;10. F;11. TTC	1. 0.63017;2. 980;3. 2938;4. 1048;5. 1021;6. 3061;7. 1071;8. 3211;9. 2071;10. T;11. ACT	1. 0.52741;2. 992;3. 2974;4. 1060;5. 1033;6. 3097;7. 1083;8. 3247;9. 2107;10. R;11. AGG	1. 0.43342;2. 1214;3. 3640;4. 1282;5. 1255;6. 3763;7. 1305;8. 3913;9. 2767;10. H;11. CAC
ERS451417_01388	1717.62.peg.1399	NA	NA	NA	0.000272	3	Cdiphtheriae_NCTC11397,"Csingulare_IBSB52218","Curealyticum_DSM7109"	0.789014	0.300766	1.56294	0.334137	0.334137	1.39902	6274	38	1. 0.50464;2. 34;3. 100;4. 52;5. 34;6. 100;7. 35;8. 103;9. 64;10. N;11. AAT	1. 0.4722;2. 46;3. 136;4. 64;5. 46;6. 136;7. 47;8. 139;9. 100;10. I;11. ATA	1. 0.84702;2. 47;3. 139;4. 65;5. 47;6. 139;7. 48;8. 142;9. 103;10. S;11. TCG	1. 0.7115;2. 48;3. 142;4. 66;5. 48;6. 142;7. 49;8. 145;9. 106;10. A;11. GCA	1. 0.7156;2. 51;3. 151;4. 69;5. 51;6. 151;7. 52;8. 154;9. 115;10. Q;11. CAG	1. 0.88592;2. 55;3. 163;4. 73;5. 55;6. 163;7. 56;8. 166;9. 127;10. E;11. GAA	1. 0.75812;2. 57;3. 169;4. 75;5. 57;6. 169;7. 58;8. 172;9. 133;10. D;11. GAC	1. 0.87076;2. 58;3. 172;4. 76;5. 58;6. 172;7. 59;8. 175;9. 136;10. G;11. GGT	1. 0.48322;2. 86;3. 256;4. 117;5. 86;6. 256;7. 88;8. 262;9. 178;10. V;11. GTC	1. 0.49332;2. 92;3. 274;4. 123;5. 92;6. 274;7. 94;8. 280;9. 196;10. T;11. ACC	1. 0.70832;2. 93;3. 277;4. 124;5. 93;6. 277;7. 95;8. 283;9. 199;10. Q;11. CAG	1. 0.48442;2. 95;3. 283;4. 126;5. 95;6. 283;7. 97;8. 289;9. 205;10. L;11. CTT	1. 0.43211;2. 96;3. 286;4. 127;5. 96;6. 286;7. 98;8. 292;9. 208;10. G;11. GGG	1. 0.68348;2. 105;3. 313;4. 137;5. 105;6. 313;7. 107;8. 319;9. 235;10. G;11. GGG	1. 0.85975;2. 108;3. 322;4. 140;5. 108;6. 322;7. 110;8. 328;9. 244;10. F;11. TTT	1. 0.73614;2. 110;3. 328;4. 142;5. 110;6. 328;7. 112;8. 334;9. 250;10. R;11. CGG	1. 0.45362;2. 120;3. 358;4. 174;5. 120;6. 358;7. 122;8. 364;9. 280;10. Q;11. CAG	1. 0.41949;2. 134;3. 400;4. 188;5. 134;6. 400;7. 136;8. 406;9. 322;10. T;11. ACG	1. 0.47847;2. 135;3. 403;4. 189;5. 135;6. 403;7. 137;8. 409;9. 325;10. L;11. TTG	1. 0.77942;2. 138;3. 412;4. 192;5. 138;6. 412;7. 140;8. 418;9. 334;10. E;11. GAG	1. 0.40124;2. 145;3. 433;4. 199;5. 145;6. 433;7. 147;8. 439;9. 355;10. S;11. AGT	1. 0.86074;2. 158;3. 472;4. 212;5. 158;6. 472;7. 160;8. 478;9. 394;10. F;11. TTT	1. 0.77401;2. 163;3. 487;4. 219;5. 163;6. 487;7. 165;8. 493;9. 409;10. S;11. TCG	1. 0.86488;2. 172;3. 514;4. 228;5. 172;6. 514;7. 174;8. 520;9. 436;10. A;11. GCA	1. 0.47183;2. 202;3. 604;4. 262;5. 202;6. 604;7. 204;8. 610;9. 526;10. S;11. TCT	1. 0.72679;2. 204;3. 610;4. 264;5. 204;6. 610;7. 206;8. 616;9. 532;10. V;11. GTA	1. 0.70156;2. 205;3. 613;4. 272;5. 205;6. 613;7. 207;8. 619;9. 535;10. S;11. AGT	1. 0.41005;2. 226;3. 676;4. 293;5. 226;6. 676;7. 228;8. 682;9. 598;10. R;11. CGG	1. 0.61829;2. 229;3. 685;4. 297;5. 229;6. 685;7. 231;8. 691;9. 607;10. W;11. TGG	1. 0.8133;2. 251;3. 751;4. 320;5. 251;6. 751;7. 253;8. 757;9. 673;10. I;11. ATT	1. 0.68156;2. 262;3. 784;4. 340;5. 262;6. 784;7. 264;8. 790;9. 706;10. T;11. ACC	1. 0.42837;2. 263;3. 787;4. 341;5. 263;6. 787;7. 265;8. 793;9. 709;10. L;11. CTT	1. 0.42772;2. 285;3. 853;4. 363;5. 285;6. 853;7. 287;8. 859;9. 775;10. Q;11. CAG	1. 0.41906;2. 286;3. 856;4. 364;5. 286;6. 856;7. 288;8. 862;9. 778;10. S;11. TCC
ERS451417_01102	1717.62.peg.1113	NA	NA	NA	0.0004542	3	Caurimucosum_ATCC700975,"Cdiphtheriae_NCTC11397","Cureicelerivorans_IMMIBRIV2301"	12.2923	0.247428	2.17221	0.292215	0.292215	2.09877	4224	17	1. 0.80678;2. 47;3. 139;4. 57;5. 57;6. 169;7. 66;8. 196;9. 79;10. S;11. TCC	1. 0.70594;2. 52;3. 154;4. 62;5. 62;6. 184;7. 71;8. 211;9. 94;10. V;11. GTT	1. 0.45473;2. 53;3. 157;4. 63;5. 63;6. 187;7. 72;8. 214;9. 97;10. E;11. GAA	1. 0.6049;2. 60;3. 178;4. 70;5. 70;6. 208;7. 79;8. 235;9. 118;10. K;11. AAA	1. 0.77772;2. 62;3. 184;4. 72;5. 72;6. 214;7. 81;8. 241;9. 124;10. T;11. ACT	1. 0.76792;2. 63;3. 187;4. 73;5. 73;6. 217;7. 82;8. 244;9. 127;10. A;11. GCC	1. 0.67025;2. 64;3. 190;4. 74;5. 74;6. 220;7. 83;8. 247;9. 130;10. N;11. AAC	1. 0.89128;2. 104;3. 310;4. 114;5. 114;6. 340;7. 123;8. 367;9. 250;10. S;11. TCT	1. 0.64691;2. 114;3. 340;4. 124;5. 124;6. 370;7. 133;8. 397;9. 280;10. S;11. TCA	1. 0.62792;2. 149;3. 445;4. 159;5. 159;6. 475;7. 170;8. 508;9. 328;10. S;11. TCC	1. 0.47611;2. 150;3. 448;4. 160;5. 160;6. 478;7. 171;8. 511;9. 331;10. E;11. GAG	1. 0.40604;2. 152;3. 454;4. 162;5. 162;6. 484;7. 173;8. 517;9. 337;10. C;11. TGT	1. 0.49054;2. 154;3. 460;4. 164;5. 164;6. 490;7. 175;8. 523;9. 343;10. L;11. TTG	1. 0.5228;2. 157;3. 469;4. 167;5. 167;6. 499;7. 178;8. 532;9. 352;10. Q;11. CAA	1. 0.41119;2. 160;3. 478;4. 170;5. 170;6. 508;7. 181;8. 541;9. 361;10. T;11. ACA	1. 0.54909;2. 199;3. 595;4. 209;5. 209;6. 625;7. 229;8. 685;9. 466;10. K;11. AAA	1. 0.82808;2. 222;3. 664;4. 232;5. 232;6. 694;7. 252;8. 754;9. 535;10. A;11. GCA
ERS451417_02229	1717.62.peg.2254	NA	NA	NA	0.001182	28	Catypicum_R2070,"Caurimucosum_ATCC700975","Cbelfantii_FRC0043","Ccallunae_DSM20147","Ccamporealensis_DSM44610","Cdeserti_GIMN1010","Cdiphtheriae_NCTC11397","Cdoosanense_DSM45436","Cepidermidicanis_DSM45586","Cfalsenii_DSM44353","Cglutamicum_ATCC13032","Chalotolerans_YIM70093","Chumireducens_DSM45392","Cimitans_DSM44264","Ckutscheri_DSM20755","Cmarinum_DSM44953","Cmaris_DSM45190","Cmustelae_DSM452…	4.16532	0.241126	1.62933	0.271728	0.241754	1.6258	2048	1	1. 0.80752;2. 281;3. 841;4. 375;5. 306;6. 916;7. 330;8. 988;9. 580;10. S;11. AGC
ERS451417_01682	1717.62.peg.1689	NA	NA	NA	0.001287	11	Ccamporealensis_DSM44610,"Cdiphtheriae_NCTC11397","Cmaris_DSM45190","Cmustelae_DSM45274","Cpseudotuberculosis_31","Cpseudotuberculosis_ATCC19410","Culcerans_NCTC12077","Culcerans_NCTC7910","Cureicelerivorans_IMMIBRIV2301","Cuterequi_DSM45634","Cvitaeruminis_DSM20294"	23.8202	0.33926	1.8117	0.493346	0.341198	1.78458	4096	85	1. 0.56173;2. 13;3. 37;4. 42;5. 42;6. 124;7. 45;8. 133;9. 16;10. Y;11. TAC	1. 0.61394;2. 18;3. 52;4. 47;5. 47;6. 139;7. 50;8. 148;9. 31;10. T;11. ACG	1. 0.5245;2. 19;3. 55;4. 48;5. 48;6. 142;7. 51;8. 151;9. 34;10. A;11. GCA	1. 0.68223;2. 24;3. 70;4. 53;5. 53;6. 157;7. 56;8. 166;9. 49;10. I;11. ATT	1. 0.50844;2. 30;3. 88;4. 59;5. 59;6. 175;7. 62;8. 184;9. 67;10. I;11. ATC	1. 0.55148;2. 34;3. 100;4. 63;5. 63;6. 187;7. 66;8. 196;9. 79;10. T;11. ACT	1. 0.98509;2. 39;3. 115;4. 68;5. 68;6. 202;7. 71;8. 211;9. 94;10. V;11. GTT	1. 0.76094;2. 67;3. 199;4. 96;5. 96;6. 286;7. 99;8. 295;9. 178;10. H;11. CAC	1. 0.88314;2. 75;3. 223;4. 104;5. 104;6. 310;7. 107;8. 319;9. 202;10. A;11. GCT	1. 0.9932;2. 94;3. 280;4. 140;5. 130;6. 388;7. 138;8. 412;9. 244;10. P;11. CCT	1. 0.64062;2. 111;3. 331;4. 164;5. 147;6. 439;7. 155;8. 463;9. 295;10. A;11. GCG	1. 0.63069;2. 112;3. 334;4. 165;5. 148;6. 442;7. 156;8. 466;9. 298;10. V;11. GTG	1. 0.99519;2. 121;3. 361;4. 174;5. 157;6. 469;7. 165;8. 493;9. 325;10. L;11. CTT	1. 0.61438;2. 124;3. 370;4. 177;5. 160;6. 478;7. 168;8. 502;9. 334;10. A;11. GCT	1. 0.98016;2. 129;3. 385;4. 182;5. 165;6. 493;7. 173;8. 517;9. 349;10. N;11. AAT	1. 0.98649;2. 133;3. 397;4. 200;5. 170;6. 508;7. 177;8. 529;9. 352;10. L;11. CTT	1. 0.51987;2. 135;3. 403;4. 202;5. 172;6. 514;7. 179;8. 535;9. 358;10. L;11. CTT	1. 0.57643;2. 142;3. 424;4. 209;5. 179;6. 535;7. 186;8. 556;9. 379;10. S;11. TCC	1. 0.43257;2. 143;3. 427;4. 210;5. 180;6. 538;7. 187;8. 559;9. 382;10. V;11. GTT	1. 0.99038;2. 147;3. 439;4. 214;5. 184;6. 550;7. 191;8. 571;9. 394;10. E;11. GAA	1. 0.58792;2. 148;3. 442;4. 215;5. 185;6. 553;7. 192;8. 574;9. 397;10. K;11. AAG	1. 0.45152;2. 161;3. 481;4. 228;5. 198;6. 592;7. 205;8. 613;9. 436;10. A;11. GCT	1. 0.67154;2. 182;3. 544;4. 260;5. 221;6. 661;7. 226;8. 676;9. 463;10. V;11. GTT	1. 0.41525;2. 190;3. 568;4. 268;5. 229;6. 685;7. 234;8. 700;9. 487;10. P;11. CCG	1. 0.99029;2. 193;3. 577;4. 271;5. 232;6. 694;7. 237;8. 709;9. 496;10. G;11. GGT	1. 0.43026;2. 206;3. 616;4. 284;5. 245;6. 733;7. 250;8. 748;9. 535;10. Y;11. TAT	1. 0.46174;2. 218;3. 652;4. 296;5. 257;6. 769;7. 265;8. 793;9. 559;10. S;11. TCT	1. 0.83691;2. 219;3. 655;4. 300;5. 260;6. 778;7. 266;8. 796;9. 562;10. S;11. TCA	1. 0.99004;2. 220;3. 658;4. 301;5. 261;6. 781;7. 267;8. 799;9. 565;10. S;11. AGC	1. 0.68807;2. 224;3. 670;4. 305;5. 265;6. 793;7. 271;8. 811;9. 577;10. P;11. CCA	1. 0.70736;2. 228;3. 682;4. 309;5. 269;6. 805;7. 275;8. 823;9. 589;10. S;11. TCT	1. 0.41508;2. 232;3. 694;4. 313;5. 273;6. 817;7. 279;8. 835;9. 601;10. D;11. GAT	1. 0.67501;2. 233;3. 697;4. 314;5. 274;6. 820;7. 280;8. 838;9. 604;10. S;11. AGT	1. 0.59881;2. 234;3. 700;4. 315;5. 275;6. 823;7. 281;8. 841;9. 607;10. A;11. GCT
ERS451417_00420	1717.62.peg.420	NA	NA	NA	0.001859	13	Catypicum_R2070,"Ccamporealensis_DSM44610","Cdiphtheriae_NCTC11397","Cdoosanense_DSM45436","Cefficiens_YS314","Cglutamicum_ATCC13032","Chalotolerans_YIM70093","Cmarinum_DSM44953","Cmaris_DSM45190","Csimulans_PES1","Ctestudinoris_DSM44614","Cuterequi_DSM45634","Cvitaeruminis_DSM20294"	18.3846	0.212239	1.87983	0.308588	0.218983	1.85911	4096	22	1. 0.41875;2. 57;3. 169;4. 108;5. 108;6. 322;7. 123;8. 367;9. 124;10. S;11. TCG	1. 0.94218;2. 59;3. 175;4. 110;5. 110;6. 328;7. 125;8. 373;9. 130;10. K;11. AAG	1. 0.73223;2. 61;3. 181;4. 112;5. 112;6. 334;7. 127;8. 379;9. 136;10. L;11. TTA	1. 0.409;2. 64;3. 190;4. 115;5. 115;6. 343;7. 130;8. 388;9. 145;10. S;11. TCT	1. 0.9043;2. 67;3. 199;4. 118;5. 118;6. 352;7. 133;8. 397;9. 154;10. T;11. ACC	1. 0.62959;2. 68;3. 202;4. 119;5. 119;6. 355;7. 134;8. 400;9. 157;10. H;11. CAC	1. 0.46563;2. 70;3. 208;4. 121;5. 121;6. 361;7. 136;8. 406;9. 163;10. G;11. GGT	1. 0.90647;2. 73;3. 217;4. 124;5. 124;6. 370;7. 139;8. 415;9. 172;10. N;11. AAC	1. 0.99448;2. 84;3. 250;4. 135;5. 135;6. 403;7. 150;8. 448;9. 205;10. C;11. TGT	1. 0.43549;2. 94;3. 280;4. 145;5. 145;6. 433;7. 160;8. 478;9. 235;10. Y;11. TAT	1. 0.47306;2. 114;3. 340;4. 165;5. 165;6. 493;7. 180;8. 538;9. 295;10. Q;11. CAA	1. 0.96423;2. 123;3. 367;4. 174;5. 174;6. 520;7. 189;8. 565;9. 322;10. F;11. TTC	1. 0.7616;2. 142;3. 424;4. 194;5. 193;6. 577;7. 208;8. 622;9. 379;10. K;11. AAA	1. 0.46794;2. 144;3. 430;4. 196;5. 195;6. 583;7. 210;8. 628;9. 385;10. A;11. GCA	1. 0.96548;2. 149;3. 445;4. 201;5. 200;6. 598;7. 215;8. 643;9. 400;10. Q;11. CAA	1. 0.93274;2. 175;3. 523;4. 227;5. 226;6. 676;7. 241;8. 721;9. 478;10. V;11. GTG	1. 0.95595;2. 178;3. 532;4. 230;5. 229;6. 685;7. 244;8. 730;9. 487;10. S;11. TCG	1. 0.57174;2. 179;3. 535;4. 231;5. 230;6. 688;7. 245;8. 733;9. 490;10. I;11. ATT	1. 0.45831;2. 185;3. 553;4. 237;5. 236;6. 706;7. 251;8. 751;9. 508;10. A;11. GCT	1. 0.96896;2. 195;3. 583;4. 247;5. 246;6. 736;7. 261;8. 781;9. 538;10. R;11. CGA	1. 0.96414;2. 203;3. 607;4. 255;5. 254;6. 760;7. 269;8. 805;9. 562;10. T;11. ACC	1. 0.47325;2. 210;3. 628;4. 262;5. 261;6. 781;7. 276;8. 826;9. 583;10. L;11. CTA
ERS451417_00275	1717.62.peg.272	NA	NA	NA	0.006612	12	Ccallunae_DSM20147,"Ccamporealensis_DSM44610","Cdiphtheriae_NCTC11397","Cdoosanense_DSM45436","Cepidermidicanis_DSM45586","Cglutamicum_ATCC13032","Chumireducens_DSM45392","Clactis_RW25","Cmarinum_DSM44953","Cmaris_DSM45190","Csimulans_PES1","Curealyticum_DSM7109"	51.2771	0.337368	1.6222	0.405131	0.335891	1.57759	7168	12	1. 0.97776;2. 65;3. 193;4. 83;5. 83;6. 247;7. 90;8. 268;9. 115;10. Q;11. CAG	1. 0.98755;2. 121;3. 361;4. 142;5. 142;6. 424;7. 152;8. 454;9. 229;10. V;11. GTG	1. 0.657;2. 122;3. 364;4. 143;5. 143;6. 427;7. 153;8. 457;9. 232;10. T;11. ACA	1. 0.49259;2. 134;3. 400;4. 155;5. 155;6. 463;7. 165;8. 493;9. 268;10. S;11. TCC	1. 0.95628;2. 140;3. 418;4. 161;5. 161;6. 481;7. 171;8. 511;9. 286;10. V;11. GTC	1. 0.61335;2. 153;3. 457;4. 174;5. 174;6. 520;7. 184;8. 550;9. 325;10. V;11. GTA	1. 0.68791;2. 168;3. 502;4. 189;5. 189;6. 565;7. 199;8. 595;9. 370;10. S;11. TCA	1. 0.46495;2. 184;3. 550;4. 205;5. 205;6. 613;7. 215;8. 643;9. 418;10. V;11. GTG	1. 0.43399;2. 194;3. 580;4. 215;5. 215;6. 643;7. 225;8. 673;9. 448;10. Y;11. TAT	1. 0.97104;2. 198;3. 592;4. 219;5. 219;6. 655;7. 229;8. 685;9. 460;10. V;11. GTG	1. 0.61705;2. 202;3. 604;4. 223;5. 223;6. 667;7. 233;8. 697;9. 472;10. D;11. GAT	1. 0.46422;2. 213;3. 637;4. 238;5. 238;6. 712;7. 248;8. 742;9. 496;10. Q;11. CAA
ERS451417_00212	1717.62.peg.209	NA	NA	NA	0.007195	11	Cbelfantii_FRC0043,"Cdiphtheriae_NCTC11397","Ckroppenstedtii_DSM44385","Clactis_RW25","Cmustelae_DSM45274","Cpseudotuberculosis_31","Cpseudotuberculosis_ATCC19410","Crouxii_FRC0190","Csilvaticum_KL0182","Culcerans_NCTC12077","Culcerans_NCTC7910"	0.211814	0.0386327	2.38219	0.0762398	0.0380772	2.38859	2	5	1. 0.51514;2. 290;3. 868;4. 313;5. 313;6. 937;7. 325;8. 973;9. 763;10. V;11. GTT	1. 0.99889;2. 291;3. 871;4. 314;5. 314;6. 940;7. 326;8. 976;9. 766;10. K;11. AAA	1. 0.54283;2. 292;3. 874;4. 315;5. 315;6. 943;7. 327;8. 979;9. 769;10. G;11. GGC	1. 0.54268;2. 295;3. 883;4. 318;5. 318;6. 952;7. 330;8. 988;9. 778;10. A;11. GCT	1. 0.5152;2. 309;3. 925;4. 332;5. 332;6. 994;7. 344;8. 1030;9. 820;10. I;11. ATT
ERS451417_00427	1717.62.peg.428	NA	NA	NA	0.01044	3	Cdiphtheriae_NCTC11397,"CriegeliiPUDD83A45","Cvitaeruminis_DSM20294"	0.701089	0.382585	1.96317	0.422664	0.422664	1.96356	6530	0
ERS451417_00418	1717.62.peg.418	NA	NA	NA	0.01089	8	Catypicum_R2070,"Cdiphtheriae_NCTC11397","Cdoosanense_DSM45436","Chalotolerans_YIM70093","Cmarinum_DSM44953","Cmaris_DSM45190","Ctestudinoris_DSM44614","Cvitaeruminis_DSM20294"	6.79032	0.180101	1.80831	0.272701	0.181205	1.7977	6144	41	1. 0.73257;2. 39;3. 115;4. 45;5. 45;6. 133;7. 67;8. 199;9. 28;10. Y;11. TAT	1. 0.54324;2. 45;3. 133;4. 51;5. 51;6. 151;7. 73;8. 217;9. 46;10. D;11. GAC	1. 0.44802;2. 62;3. 184;4. 68;5. 68;6. 202;7. 90;8. 268;9. 97;10. S;11. TCA	1. 0.71102;2. 83;3. 247;4. 89;5. 89;6. 265;7. 111;8. 331;9. 160;10. A;11. GCA	1. 0.6131;2. 86;3. 256;4. 92;5. 92;6. 274;7. 115;8. 343;9. 166;10. G;11. GGT	1. 0.66799;2. 88;3. 262;4. 94;5. 94;6. 280;7. 117;8. 349;9. 172;10. K;11. AAA	1. 0.70711;2. 129;3. 385;4. 151;5. 136;6. 406;7. 158;8. 472;9. 295;10. I;11. ATA	1. 0.85608;2. 131;3. 391;4. 153;5. 138;6. 412;7. 160;8. 478;9. 301;10. N;11. AAT	1. 0.46667;2. 166;3. 496;4. 188;5. 173;6. 517;7. 195;8. 583;9. 406;10. K;11. AAG	1. 0.94094;2. 179;3. 535;4. 201;5. 186;6. 556;7. 208;8. 622;9. 445;10. Y;11. TAT	1. 0.43454;2. 192;3. 574;4. 214;5. 199;6. 595;7. 221;8. 661;9. 484;10. I;11. ATC	1. 0.52602;2. 196;3. 586;4. 218;5. 203;6. 607;7. 225;8. 673;9. 496;10. S;11. AGT	1. 0.64698;2. 223;3. 667;4. 245;5. 230;6. 688;7. 252;8. 754;9. 577;10. T;11. ACA	1. 0.65061;2. 252;3. 754;4. 274;5. 259;6. 775;7. 281;8. 841;9. 664;10. C;11. TGT	1. 0.58474;2. 255;3. 763;4. 277;5. 262;6. 784;7. 284;8. 850;9. 673;10. G;11. GGT	1. 0.74562;2. 258;3. 772;4. 280;5. 265;6. 793;7. 287;8. 859;9. 682;10. L;11. TTA	1. 0.76159;2. 263;3. 787;4. 285;5. 270;6. 808;7. 292;8. 874;9. 697;10. C;11. TGC	1. 0.72192;2. 272;3. 814;4. 294;5. 279;6. 835;7. 301;8. 901;9. 724;10. K;11. AAG	1. 0.72184;2. 273;3. 817;4. 295;5. 280;6. 838;7. 302;8. 904;9. 727;10. S;11. TCA	1. 0.76938;2. 275;3. 823;4. 297;5. 282;6. 844;7. 304;8. 910;9. 733;10. D;11. GAT	1. 0.44933;2. 291;3. 871;4. 313;5. 298;6. 892;7. 320;8. 958;9. 772;10. S;11. AGT	1. 0.56988;2. 313;3. 937;4. 335;5. 320;6. 958;7. 342;8. 1024;9. 778;10. Q;11. CAA	1. 0.75533;2. 338;3. 1012;4. 360;5. 345;6. 1033;7. 367;8. 1099;9. 853;10. K;11. AAA	1. 0.77505;2. 367;3. 1099;4. 395;5. 380;6. 1138;7. 402;8. 1204;9. 877;10. S;11. TCG	1. 0.8104;2. 404;3. 1210;4. 432;5. 417;6. 1249;7. 439;8. 1315;9. 988;10. S;11. TCG	1. 0.88357;2. 409;3. 1225;4. 437;5. 422;6. 1264;7. 444;8. 1330;9. 1003;10. N;11. AAT	1. 0.85353;2. 444;3. 1330;4. 472;5. 457;6. 1369;7. 479;8. 1435;9. 1108;10. Q;11. CAA	1. 0.55959;2. 447;3. 1339;4. 475;5. 460;6. 1378;7. 482;8. 1444;9. 1117;10. M;11. ATG	1. 0.48043;2. 453;3. 1357;4. 481;5. 466;6. 1396;7. 488;8. 1462;9. 1135;10. Q;11. CAA	1. 0.95822;2. 461;3. 1381;4. 489;5. 474;6. 1420;7. 496;8. 1486;9. 1159;10. C;11. TGT	1. 0.45214;2. 476;3. 1426;4. 504;5. 489;6. 1465;7. 511;8. 1531;9. 1204;10. S;11. AGC	1. 0.76674;2. 512;3. 1534;4. 540;5. 525;6. 1573;7. 547;8. 1639;9. 1312;10. V;11. GTG	1. 0.73103;2. 574;3. 1720;4. 629;5. 614;6. 1840;7. 664;8. 1990;9. 1372;10. H;11. CAT	1. 0.89332;2. 575;3. 1723;4. 630;5. 615;6. 1843;7. 665;8. 1993;9. 1375;10. F;11. TTT
ERS451417_02339	1717.62.peg.2366	NA	NA	NA	0.01334	6	Cdiphtheriae_NCTC11397,"Cefficiens_YS314","Cepidermidicanis_DSM45586","Clactis_RW25","Curealyticum_DSM7109","Cvitaeruminis_DSM20294"	12.9838	0.219464	1.84267	0.234296	0.218395	1.84647	4096	11	1. 0.46912;2. 45;3. 133;4. 87;5. 48;6. 142;7. 50;8. 148;9. 124;10. Q;11. CAA	1. 0.93329;2. 52;3. 154;4. 94;5. 55;6. 163;7. 57;8. 169;9. 145;10. S;11. TCC	1. 0.46534;2. 57;3. 169;4. 99;5. 60;6. 178;7. 62;8. 184;9. 160;10. E;11. GAA	1. 0.93847;2. 551;3. 1651;4. 758;5. 564;6. 1690;7. 568;8. 1702;9. 1555;10. K;11. AAG	1. 0.97228;2. 552;3. 1654;4. 759;5. 565;6. 1693;7. 569;8. 1705;9. 1558;10. T;11. ACC	1. 0.90239;2. 575;3. 1723;4. 790;5. 594;6. 1780;7. 598;8. 1792;9. 1624;10. M;11. ATG	1. 0.41621;2. 584;3. 1750;4. 799;5. 603;6. 1807;7. 607;8. 1819;9. 1651;10. K;11. AAG	1. 0.94265;2. 729;3. 2185;4. 1033;5. 748;6. 2242;7. 754;8. 2260;9. 2050;10. Q;11. CAG	1. 0.69319;2. 784;3. 2350;4. 1092;5. 807;6. 2419;7. 813;8. 2437;9. 2134;10. K;11. AAG	1. 0.75218;2. 859;3. 2575;4. 1180;5. 883;6. 2647;7. 889;8. 2665;9. 2359;10. L;11. TTG	1. 0.65864;2. 988;3. 2962;4. 1310;5. 1013;6. 3037;7. 1019;8. 3055;9. 2740;10. S;11. TCC
ERS451417_01645	1717.62.peg.1652	NA	NA	NA	0.01335	20	Cargentoratense_DSM44202,"Catypicum_R2070","Cbelfantii_FRC0043","Ccallunae_DSM20147","Cdeserti_GIMN1010","Cdiphtheriae_NCTC11397","Cefficiens_YS314","Cglutamicum_ATCC13032","Chalotolerans_YIM70093","Chumireducens_DSM45392","Cimitans_DSM44264","Ckutscheri_DSM20755","Cmarinum_DSM44953","Cmaris_DSM45190","Cmustelae_DSM45274","Cpseudotuberculosis_ATCC19410","Csilvaticum_KL0182","Ctestudinoris_DSM4461…	0.603509	0.241834	1.53244	0.242999	0.242999	1.52895	2050	1	1. 0.98546;2. 38;3. 112;4. 110;5. 68;6. 202;7. 118;8. 352;9. 22;10. T;11. ACG
ERS451417_00044	1717.62.peg.40	NA	NA	NA	0.01386	4	Ccamporealensis_DSM44610,"Cdiphtheriae_NCTC11397","Clactis_RW25","Cvitaeruminis_DSM20294"	0.305794	0.253291	1.42418	0.271178	0.271168	1.43658	4098	7	1. 0.64751;2. 62;3. 184;4. 262;5. 62;6. 184;7. 63;8. 187;9. 142;10. S;11. TCT	1. 0.64392;2. 99;3. 295;4. 299;5. 99;6. 295;7. 100;8. 298;9. 253;10. S;11. AGT	1. 0.64672;2. 146;3. 436;4. 349;5. 148;6. 442;7. 149;8. 445;9. 361;10. V;11. GTG	1. 0.59667;2. 180;3. 538;4. 398;5. 182;6. 544;7. 183;8. 547;9. 442;10. G;11. GGG	1. 0.49818;2. 198;3. 592;4. 416;5. 200;6. 598;7. 201;8. 601;9. 496;10. C;11. TGT	1. 0.40618;2. 203;3. 607;4. 421;5. 205;6. 613;7. 206;8. 616;9. 511;10. V;11. GTG	1. 0.56914;2. 292;3. 874;4. 516;5. 294;6. 880;7. 296;8. 886;9. 754;10. P;11. CCG
ERS451417_01369	1717.62.peg.1378	NA	NA	NA	0.01445	20	Cbelfantii_FRC0043,"Cdeserti_GIMN1010","Cdiphtheriae_NCTC11397","Cdoosanense_DSM45436","Cefficiens_YS314","Cglutamicum_ATCC13032","Chalotolerans_YIM70093","Chumireducens_DSM45392","Ckutscheri_DSM20755","Cmarinum_DSM44953","Cmaris_DSM45190","Cmustelae_DSM45274","Cpseudotuberculosis_31","Cpseudotuberculosis_ATCC19410","Csilvaticum_KL0182","Ctestudinoris_DSM44614","Culcerans_NCTC12077","Culcerans_NC…	0.301034	0.264332	1.53388	1	0.264159	1.53643	2306	0
ERS451417_00133	1717.62.peg.132	NA	NA	NA	0.01635	3	Cbelfantii_FRC0043,"Cdiphtheriae_NCTC11397","Crouxii_FRC0190"	1.11263	0.137299	5.69398	0.266503	0.140871	5.06001	128	5	1. 0.69738;2. 2;3. 4;4. 62;5. 22;6. 64;7. 22;8. 64;9. 1;10. P;11. CCG	1. 0.94138;2. 3;3. 7;4. 65;5. 23;6. 67;7. 23;8. 67;9. 4;10. A;11. GCG	1. 0.70172;2. 34;3. 100;4. 96;5. 54;6. 160;7. 54;8. 160;9. 97;10. K;11. AAA	1. 0.64814;2. 55;3. 163;4. 121;5. 75;6. 223;7. 75;8. 223;9. 160;10. V;11. GTG	1. 0.65418;2. 196;3. 586;4. 286;5. 216;6. 646;7. 216;8. 646;9. 583;10. E;11. GAG
ERS451417_01253	1717.62.peg.1261	NA	NA	NA	0.01962	31	Catypicum_R2070,"Caurimucosum_ATCC700975","Cbelfantii_FRC0043","Ccamporealensis_DSM44610","Cdiphtheriae_NCTC11397","Cdoosanense_DSM45436","Cepidermidicanis_DSM45586","Cfalsenii_DSM44353","Chalotolerans_YIM70093","Chumireducens_DSM45392","Cimitans_DSM44264","Cjeikeium_K41","Ckroppenstedtii_DSM44385","Ckutscheri_DSM20755","Cmarinum_DSM44953","Cmaris_DSM45190","Cmustelae_DSM45274","Cpseudotuberculos…	0.412617	0.202422	1.65802	0.226697	0.203771	1.65578	2	3	1. 0.56435;2. 155;3. 463;4. 200;5. 200;6. 598;7. 299;8. 895;9. 400;10. A;11. GCC	1. 0.85751;2. 207;3. 619;4. 252;5. 252;6. 754;7. 351;8. 1051;9. 556;10. L;11. TTA	1. 0.51268;2. 387;3. 1159;4. 432;5. 432;6. 1294;7. 531;8. 1591;9. 1051;10. S;11. AGT
ERS451417_01047	1717.62.peg.1057	NA	NA	NA	0.02257	22	Cbelfantii_FRC0043,"Ccallunae_DSM20147","Ccamporealensis_DSM44610","Cdeserti_GIMN1010","Cdiphtheriae_NCTC11397","Cefficiens_YS314","Cepidermidicanis_DSM45586","Chalotolerans_YIM70093","Chumireducens_DSM45392","Cimitans_DSM44264","Cmarinum_DSM44953","Cmaris_DSM45190","Cmustelae_DSM45274","Cpseudotuberculosis_31","Cpseudotuberculosis_ATCC19410","Crouxii_FRC0190","Csilvaticum_KL0182","Csingulare_IBS…	0.382392	0.331974	1.67252	1	0.333137	1.67929	3074	2	1. 0.44904;2. 122;3. 364;4. 150;5. 132;6. 394;7. 141;8. 421;9. 274;10. V;11. GTG	1. 0.44738;2. 140;3. 418;4. 172;5. 150;6. 448;7. 159;8. 475;9. 328;10. D;11. GAC
ERS451417_02149	1717.62.peg.2171	NA	NA	NA	0.02414	7	Cbelfantii_FRC0043,"Cdiphtheriae_NCTC11397","Clactis_RW25","Cpseudotuberculosis_ATCC19410","Csilvaticum_KL0182","Culcerans_NCTC12077","Culcerans_NCTC7910"	72.6234	0.0712749	2.66033	0.0764101	0.0764101	2.66258	2304	0
ERS451417_02070	1717.62.peg.2082	NA	NA	NA	0.02539	7	Cbelfantii_FRC0043,"Cdiphtheriae_NCTC11397","Cpseudotuberculosis_31","Cpseudotuberculosis_ATCC19410","Csilvaticum_KL0182","Culcerans_NCTC12077","Culcerans_NCTC7910"	0.936099	0.112269	2.41852	0.225548	0.107801	2.39929	2048	4	1. 0.59261;2. 102;3. 304;4. 120;5. 104;6. 310;7. 107;8. 319;9. 172;10. Q;11. CAA	1. 0.64859;2. 127;3. 379;4. 145;5. 129;6. 385;7. 132;8. 394;9. 247;10. A;11. GCC	1. 0.74115;2. 292;3. 874;4. 333;5. 294;6. 880;7. 297;8. 889;9. 733;10. H;11. CAC	1. 0.97738;2. 340;3. 1018;4. 438;5. 342;6. 1024;7. 345;8. 1033;9. 877;10. T;11. ACA
ERS451417_01652	1717.62.peg.1659	NA	NA	NA	0.02693	38	Cargentoratense_DSM44202,"Catypicum_R2070","Caurimucosum_ATCC700975","Cbelfantii_FRC0043","Ccallunae_DSM20147","Ccamporealensis_DSM44610","Cdeserti_GIMN1010","Cdiphtheriae_NCTC11397","Cdoosanense_DSM45436","Cefficiens_YS314","Cepidermidicanis_DSM45586","Cfalsenii_DSM44353","Cglutamicum_ATCC13032","Cglycinophilum_AJ3170","Chalotolerans_YIM70093","Chumireducens_DSM45392","Cimitans_DSM44264","Cjeike…	0.15812	0.15812	1.48612	0.246117	0.246117	1.50966	258	0
ERS451417_01260	1717.62.peg.1268	NA	NA	NA	0.02966	4	Cdiphtheriae_NCTC11397,"Csilvaticum_KL0182","Culcerans_NCTC12077","Culcerans_NCTC7910"	7.1867	0.261502	2.04203	0.482496	0.272429	1.7225	4096	5	1. 0.91161;2. 16;3. 46;4. 35;5. 16;6. 46;7. 19;8. 55;9. 16;10. R;11. CGC	1. 0.92867;2. 42;3. 124;4. 61;5. 42;6. 124;7. 45;8. 133;9. 94;10. S;11. TCG	1. 0.92417;2. 57;3. 169;4. 76;5. 57;6. 169;7. 60;8. 178;9. 139;10. S;11. AGC	1. 0.92867;2. 84;3. 250;4. 146;5. 90;6. 268;7. 93;8. 277;9. 187;10. S;11. TCG	1. 0.91066;2. 114;3. 340;4. 177;5. 120;6. 358;7. 123;8. 367;9. 277;10. C;11. TGT
ERS451417_00253	1717.62.peg.248	NA	NA	NA	0.0309	9	Cargentoratense_DSM44202,"Cbelfantii_FRC0043","Cdiphtheriae_NCTC11397","Ckroppenstedtii_DSM44385","Cmustelae_DSM45274","Crouxii_FRC0190","Csilvaticum_KL0182","Culcerans_NCTC12077","Culcerans_NCTC7910"	0.243238	0.0863457	2.06306	0.129819	0.0855439	2.06971	2	4	1. 0.41761;2. 73;3. 217;4. 84;5. 80;6. 238;7. 91;8. 271;9. 112;10. P;11. CCC	1. 0.98752;2. 262;3. 784;4. 298;5. 293;6. 877;7. 323;8. 967;9. 580;10. T;11. ACA	1. 0.47443;2. 303;3. 907;4. 343;5. 334;6. 1000;7. 364;8. 1090;9. 703;10. T;11. ACC	1. 0.55045;2. 411;3. 1231;4. 467;5. 446;6. 1336;7. 477;8. 1429;9. 988;10. D;11. GAC
ERS451417_01105	1717.62.peg.1116	NA	NA	NA	0.03105	3	Cdiphtheriae_NCTC11397,"Clactis_RW25","Curealyticum_DSM7109"	14.415	0.153941	1.99834	0.327869	0.153627	1.66865	5248	38	1. 0.66224;2. 17;3. 49;4. 61;5. 41;6. 121;7. 41;8. 121;9. 49;10. I;11. ATC	1. 0.70524;2. 27;3. 79;4. 71;5. 51;6. 151;7. 51;8. 151;9. 79;10. K;11. AAA	1. 0.86355;2. 28;3. 82;4. 72;5. 52;6. 154;7. 52;8. 154;9. 82;10. K;11. AAG	1. 0.67486;2. 32;3. 94;4. 76;5. 56;6. 166;7. 56;8. 166;9. 94;10. L;11. CTT	1. 0.86511;2. 42;3. 124;4. 86;5. 66;6. 196;7. 66;8. 196;9. 124;10. I;11. ATC	1. 0.86854;2. 45;3. 133;4. 89;5. 69;6. 205;7. 69;8. 205;9. 133;10. T;11. ACG	1. 0.41457;2. 46;3. 136;4. 90;5. 70;6. 208;7. 70;8. 208;9. 136;10. S;11. AGT	1. 0.87203;2. 49;3. 145;4. 93;5. 73;6. 217;7. 73;8. 217;9. 145;10. H;11. CAC	1. 0.89564;2. 61;3. 181;4. 105;5. 85;6. 253;7. 85;8. 253;9. 181;10. S;11. AGC	1. 0.94472;2. 83;3. 247;4. 129;5. 107;6. 319;7. 107;8. 319;9. 247;10. K;11. AAG	1. 0.95655;2. 107;3. 319;4. 153;5. 131;6. 391;7. 131;8. 391;9. 319;10. S;11. TCA	1. 0.80739;2. 109;3. 325;4. 155;5. 133;6. 397;7. 133;8. 397;9. 325;10. T;11. ACC	1. 0.55213;2. 112;3. 334;4. 158;5. 136;6. 406;7. 136;8. 406;9. 334;10. L;11. CTG	1. 0.49952;2. 113;3. 337;4. 159;5. 137;6. 409;7. 137;8. 409;9. 337;10. C;11. TGC	1. 0.93882;2. 117;3. 349;4. 163;5. 141;6. 421;7. 141;8. 421;9. 349;10. C;11. TGT	1. 0.91073;2. 119;3. 355;4. 165;5. 143;6. 427;7. 143;8. 427;9. 355;10. T;11. ACA	1. 0.86355;2. 123;3. 367;4. 169;5. 147;6. 439;7. 147;8. 439;9. 367;10. K;11. AAG	1. 0.45088;2. 126;3. 376;4. 172;5. 150;6. 448;7. 150;8. 448;9. 376;10. K;11. AAA	1. 0.60928;2. 127;3. 379;4. 173;5. 151;6. 451;7. 151;8. 451;9. 379;10. R;11. AGA	1. 0.47822;2. 132;3. 394;4. 178;5. 156;6. 466;7. 156;8. 466;9. 394;10. L;11. CTA	1. 0.94389;2. 133;3. 397;4. 179;5. 157;6. 469;7. 157;8. 469;9. 397;10. Q;11. CAA	1. 0.64163;2. 144;3. 430;4. 190;5. 168;6. 502;7. 168;8. 502;9. 430;10. L;11. TTA	1. 0.86648;2. 147;3. 439;4. 193;5. 171;6. 511;7. 171;8. 511;9. 439;10. W;11. TGG	1. 0.93862;2. 153;3. 457;4. 199;5. 177;6. 529;7. 177;8. 529;9. 457;10. L;11. CTG	1. 0.73111;2. 158;3. 472;4. 204;5. 182;6. 544;7. 182;8. 544;9. 472;10. M;11. ATG	1. 0.81946;2. 174;3. 520;4. 220;5. 198;6. 592;7. 198;8. 592;9. 520;10. L;11. CTC	1. 0.59967;2. 186;3. 556;4. 232;5. 210;6. 628;7. 210;8. 628;9. 556;10. L;11. TTA	1. 0.86734;2. 188;3. 562;4. 234;5. 212;6. 634;7. 212;8. 634;9. 562;10. Y;11. TAC	1. 0.61064;2. 192;3. 574;4. 238;5. 216;6. 646;7. 216;8. 646;9. 574;10. R;11. CGA	1. 0.6043;2. 197;3. 589;4. 243;5. 221;6. 661;7. 221;8. 661;9. 589;10. K;11. AAA	1. 0.83175;2. 198;3. 592;4. 244;5. 222;6. 664;7. 222;8. 664;9. 592;10. D;11. GAC	1. 0.92212;2. 201;3. 601;4. 247;5. 225;6. 673;7. 225;8. 673;9. 601;10. T;11. ACC	1. 0.80864;2. 206;3. 616;4. 252;5. 230;6. 688;7. 230;8. 688;9. 616;10. V;11. GTC	1. 0.85782;2. 207;3. 619;4. 253;5. 231;6. 691;7. 231;8. 691;9. 619;10. T;11. ACC
ERS451417_02273	1717.62.peg.2302	NA	NA	NA	0.03239	15	Caurimucosum_ATCC700975,"Ccamporealensis_DSM44610","Cdiphtheriae_NCTC11397","Ckutscheri_DSM20755","Cmustelae_DSM45274","Cpseudotuberculosis_31","Cpseudotuberculosis_ATCC19410","CriegeliiPUDD83A45","Csilvaticum_KL0182","Csimulans_PES1","Csingulare_IBSB52218","Culcerans_NCTC12077","Culcerans_NCTC7910","Cureicelerivorans_IMMIBRIV2301","Cvitaeruminis_DSM20294"	0.401919	0.139506	1.96492	0.219216	0.140327	1.97218	7170	16	1. 0.94445;2. 16;3. 46;4. 16;5. 16;6. 46;7. 16;8. 46;9. 43;10. F;11. TTC	1. 0.97362;2. 38;3. 112;4. 38;5. 38;6. 112;7. 38;8. 112;9. 109;10. T;11. ACC	1. 0.43942;2. 54;3. 160;4. 54;5. 54;6. 160;7. 54;8. 160;9. 157;10. A;11. GCA	1. 0.77129;2. 118;3. 352;4. 118;5. 118;6. 352;7. 118;8. 352;9. 349;10. R;11. CGC	1. 0.47527;2. 120;3. 358;4. 120;5. 120;6. 358;7. 120;8. 358;9. 355;10. Q;11. CAA	1. 0.94934;2. 136;3. 406;4. 136;5. 136;6. 406;7. 136;8. 406;9. 403;10. S;11. AGC	1. 0.93984;2. 137;3. 409;4. 137;5. 137;6. 409;7. 137;8. 409;9. 406;10. L;11. CTC	1. 0.91451;2. 182;3. 544;4. 182;5. 182;6. 544;7. 182;8. 544;9. 541;10. N;11. AAC	1. 0.86526;2. 188;3. 562;4. 188;5. 188;6. 562;7. 188;8. 562;9. 559;10. V;11. GTC	1. 0.99913;2. 209;3. 625;4. 209;5. 209;6. 625;7. 209;8. 625;9. 622;10. W;11. TGG	1. 0.93521;2. 243;3. 727;4. 243;5. 243;6. 727;7. 243;8. 727;9. 724;10. T;11. ACC	1. 0.89091;2. 252;3. 754;4. 252;5. 252;6. 754;7. 252;8. 754;9. 751;10. N;11. AAC	1. 0.94183;2. 280;3. 838;4. 280;5. 280;6. 838;7. 280;8. 838;9. 835;10. L;11. CTC	1. 0.8946;2. 281;3. 841;4. 281;5. 281;6. 841;7. 281;8. 841;9. 838;10. N;11. AAC	1. 0.92148;2. 326;3. 976;4. 326;5. 326;6. 976;7. 326;8. 976;9. 973;10. R;11. CGC	1. 0.51237;2. 331;3. 991;4. 331;5. 331;6. 991;7. 331;8. 991;9. 988;10. G;11. GGC
ERS451417_01876	1717.62.peg.1878	NA	NA	NA	0.03386	7	Caurimucosum_ATCC700975,"Ccamporealensis_DSM44610","Cdiphtheriae_NCTC11397","Cmarinum_DSM44953","Csimulans_PES1","Csingulare_IBSB52218","Ctestudinoris_DSM44614"	11.1265	0.185459	1.58026	0.335945	0.184677	1.58263	7168	42	1. 0.80926;2. 16;3. 46;4. 768;5. 45;6. 133;7. 47;8. 139;9. 4;10. G;11. GGA	1. 0.52162;2. 63;3. 187;4. 888;5. 96;6. 286;7. 109;8. 325;9. 31;10. T;11. ACA	1. 0.85847;2. 65;3. 193;4. 890;5. 98;6. 292;7. 111;8. 331;9. 37;10. N;11. AAT	1. 0.9418;2. 67;3. 199;4. 892;5. 100;6. 298;7. 113;8. 337;9. 43;10. S;11. AGT	1. 0.55356;2. 80;3. 238;4. 905;5. 113;6. 337;7. 126;8. 376;9. 82;10. E;11. GAG	1. 0.78495;2. 86;3. 256;4. 911;5. 119;6. 355;7. 132;8. 394;9. 100;10. V;11. GTG	1. 0.9522;2. 90;3. 268;4. 915;5. 123;6. 367;7. 136;8. 406;9. 112;10. P;11. CCG	1. 0.48211;2. 92;3. 274;4. 917;5. 125;6. 373;7. 138;8. 412;9. 118;10. N;11. AAT	1. 0.87809;2. 97;3. 289;4. 922;5. 130;6. 388;7. 143;8. 427;9. 130;10. V;11. GTA	1. 0.80585;2. 112;3. 334;4. 944;5. 145;6. 433;7. 158;8. 472;9. 175;10. T;11. ACC	1. 0.52757;2. 118;3. 352;4. 950;5. 151;6. 451;7. 164;8. 490;9. 193;10. L;11. TTA	1. 0.8061;2. 124;3. 370;4. 956;5. 157;6. 469;7. 170;8. 508;9. 211;10. T;11. ACG	1. 0.43326;2. 128;3. 382;4. 960;5. 161;6. 481;7. 174;8. 520;9. 223;10. S;11. TCT	1. 0.89032;2. 135;3. 403;4. 967;5. 168;6. 502;7. 181;8. 541;9. 244;10. M;11. ATG	1. 0.97279;2. 181;3. 541;4. 1058;5. 236;6. 706;7. 273;8. 817;9. 265;10. S;11. TCT	1. 0.78579;2. 182;3. 544;4. 1059;5. 237;6. 709;7. 274;8. 820;9. 268;10. V;11. GTT	1. 0.41496;2. 191;3. 571;4. 1068;5. 246;6. 736;7. 283;8. 847;9. 295;10. S;11. TCT	1. 0.48875;2. 193;3. 577;4. 1070;5. 248;6. 742;7. 285;8. 853;9. 301;10. V;11. GTT	1. 0.82789;2. 194;3. 580;4. 1071;5. 249;6. 745;7. 286;8. 856;9. 304;10. P;11. CCG	1. 0.47205;2. 205;3. 613;4. 1083;5. 260;6. 778;7. 297;8. 889;9. 337;10. R;11. AGG	1. 0.79773;2. 207;3. 619;4. 1085;5. 262;6. 784;7. 299;8. 895;9. 343;10. T;11. ACG	1. 0.97149;2. 211;3. 631;4. 1089;5. 266;6. 796;7. 303;8. 907;9. 355;10. S;11. TCT	1. 0.93472;2. 213;3. 637;4. 1091;5. 268;6. 802;7. 305;8. 913;9. 361;10. V;11. GTT	1. 0.46159;2. 218;3. 652;4. 1098;5. 273;6. 817;7. 310;8. 928;9. 376;10. H;11. CAT	1. 0.7028;2. 232;3. 694;4. 1112;5. 287;6. 859;7. 324;8. 970;9. 418;10. N;11. AAC	1. 0.87846;2. 247;3. 739;4. 1127;5. 302;6. 904;7. 339;8. 1015;9. 463;10. A;11. GCT	1. 0.42283;2. 253;3. 757;4. 1136;5. 308;6. 922;7. 345;8. 1033;9. 481;10. R;11. CGC	1. 0.63025;2. 280;3. 838;4. 1163;5. 335;6. 1003;7. 372;8. 1114;9. 562;10. M;11. ATG	1. 0.93045;2. 283;3. 847;4. 1166;5. 338;6. 1012;7. 375;8. 1123;9. 571;10. A;11. GCA	1. 0.88229;2. 284;3. 850;4. 1167;5. 339;6. 1015;7. 376;8. 1126;9. 574;10. A;11. GCC	1. 0.88049;2. 288;3. 862;4. 1171;5. 343;6. 1027;7. 380;8. 1138;9. 586;10. A;11. GCT	1. 0.94242;2. 291;3. 871;4. 1174;5. 346;6. 1036;7. 383;8. 1147;9. 595;10. H;11. CAT	1. 0.53511;2. 303;3. 907;4. 1191;5. 361;6. 1081;7. 399;8. 1195;9. 622;10. P;11. CCG	1. 0.82113;2. 312;3. 934;4. 1200;5. 370;6. 1108;7. 408;8. 1222;9. 649;10. Q;11. CAA
ERS451417_00545	1717.62.peg.549	NA	NA	NA	0.03503	8	Ccallunae_DSM20147,"Cdiphtheriae_NCTC11397","Cepidermidicanis_DSM45586","Chumireducens_DSM45392","Cmarinum_DSM44953","Csilvaticum_KL0182","Culcerans_NCTC12077","Culcerans_NCTC7910"	1.18796	0.190622	2.26146	0.273446	0.179561	2.23914	7168	16	1. 0.91456;2. 33;3. 97;4. 38;5. 34;6. 100;7. 38;8. 112;9. 40;10. H;11. CAC	1. 0.66447;2. 84;3. 250;4. 100;5. 93;6. 277;7. 116;8. 346;9. 106;10. R;11. CGC	1. 0.96161;2. 85;3. 253;4. 101;5. 94;6. 280;7. 117;8. 349;9. 109;10. S;11. AGT	1. 0.97281;2. 93;3. 277;4. 109;5. 102;6. 304;7. 125;8. 373;9. 133;10. T;11. ACC	1. 0.4724;2. 108;3. 322;4. 124;5. 117;6. 349;7. 140;8. 418;9. 178;10. S;11. AGC	1. 0.91287;2. 154;3. 460;4. 173;5. 163;6. 487;7. 186;8. 556;9. 316;10. R;11. CGT	1. 0.98413;2. 161;3. 481;4. 180;5. 170;6. 508;7. 193;8. 577;9. 337;10. F;11. TTC	1. 0.87079;2. 212;3. 634;4. 290;5. 249;6. 745;7. 319;8. 955;9. 346;10. M;11. ATG	1. 0.96518;2. 259;3. 775;4. 359;5. 296;6. 886;7. 367;8. 1099;9. 412;10. E;11. GAA	1. 0.4346;2. 297;3. 889;4. 397;5. 334;6. 1000;7. 405;8. 1213;9. 526;10. T;11. ACA	1. 0.69424;2. 360;3. 1078;4. 492;5. 406;6. 1216;7. 479;8. 1435;9. 670;10. S;11. TCC	1. 0.90508;2. 376;3. 1126;4. 519;5. 425;6. 1273;7. 498;8. 1492;9. 709;10. V;11. GTG	1. 0.59252;2. 386;3. 1156;4. 529;5. 435;6. 1303;7. 508;8. 1522;9. 739;10. R;11. CGT	1. 0.79979;2. 394;3. 1180;4. 537;5. 443;6. 1327;7. 516;8. 1546;9. 763;10. C;11. TGT	1. 0.86276;2. 403;3. 1207;4. 546;5. 452;6. 1354;7. 525;8. 1573;9. 790;10. T;11. ACG	1. 0.43863;2. 414;3. 1240;4. 557;5. 463;6. 1387;7. 536;8. 1606;9. 823;10. H;11. CAT
ERS451417_00205	1717.62.peg.202	NA	NA	NA	0.03629	3	Caurimucosum_ATCC700975,"Cdiphtheriae_NCTC11397","Ckutscheri_DSM20755"	21.2389	0.113486	1.03191	0.247214	0.103224	0.97711	4224	36	1. 0.45964;2. 19;3. 55;4. 25;5. 25;6. 73;7. 33;8. 97;9. 16;10. I;11. ATC	1. 0.41603;2. 31;3. 91;4. 37;5. 37;6. 109;7. 45;8. 133;9. 52;10. S;11. TCC	1. 0.96077;2. 41;3. 121;4. 47;5. 47;6. 139;7. 55;8. 163;9. 82;10. R;11. CGC	1. 0.55312;2. 45;3. 133;4. 51;5. 51;6. 151;7. 59;8. 175;9. 94;10. S;11. TCC	1. 0.69037;2. 49;3. 145;4. 55;5. 55;6. 163;7. 63;8. 187;9. 100;10. Q;11. CAA	1. 0.76549;2. 50;3. 148;4. 56;5. 56;6. 166;7. 64;8. 190;9. 103;10. M;11. ATG	1. 0.66215;2. 52;3. 154;4. 58;5. 58;6. 172;7. 66;8. 196;9. 109;10. H;11. CAC	1. 0.92159;2. 64;3. 190;4. 70;5. 70;6. 208;7. 78;8. 232;9. 145;10. M;11. ATG	1. 0.53705;2. 66;3. 196;4. 72;5. 72;6. 214;7. 80;8. 238;9. 151;10. H;11. CAC	1. 0.48756;2. 67;3. 199;4. 73;5. 73;6. 217;7. 81;8. 241;9. 154;10. E;11. GAA	1. 0.73968;2. 84;3. 250;4. 91;5. 91;6. 271;7. 99;8. 295;9. 187;10. S;11. TCC	1. 0.9439;2. 86;3. 256;4. 93;5. 93;6. 277;7. 101;8. 301;9. 193;10. V;11. GTG	1. 0.58554;2. 96;3. 286;4. 103;5. 103;6. 307;7. 111;8. 331;9. 223;10. R;11. CGT	1. 0.89508;2. 98;3. 292;4. 105;5. 105;6. 313;7. 113;8. 337;9. 229;10. Q;11. CAG	1. 0.62382;2. 108;3. 322;4. 115;5. 115;6. 343;7. 123;8. 367;9. 259;10. L;11. CTG	1. 0.93881;2. 126;3. 376;4. 133;5. 133;6. 397;7. 141;8. 421;9. 313;10. D;11. GAT	1. 0.93959;2. 127;3. 379;4. 134;5. 134;6. 400;7. 142;8. 424;9. 316;10. V;11. GTG	1. 0.90822;2. 139;3. 415;4. 146;5. 146;6. 436;7. 154;8. 460;9. 352;10. H;11. CAC	1. 0.68211;2. 147;3. 439;4. 154;5. 154;6. 460;7. 162;8. 484;9. 376;10. T;11. ACC	1. 0.86716;2. 167;3. 499;4. 174;5. 174;6. 520;7. 182;8. 544;9. 436;10. P;11. CCA	1. 0.41127;2. 187;3. 559;4. 194;5. 194;6. 580;7. 202;8. 604;9. 496;10. V;11. GTG	1. 0.52942;2. 190;3. 568;4. 197;5. 197;6. 589;7. 205;8. 613;9. 505;10. G;11. GGC	1. 0.4964;2. 194;3. 580;4. 201;5. 201;6. 601;7. 209;8. 625;9. 517;10. V;11. GTA	1. 0.96055;2. 201;3. 601;4. 208;5. 208;6. 622;7. 216;8. 646;9. 538;10. A;11. GCG	1. 0.91753;2. 203;3. 607;4. 210;5. 210;6. 628;7. 218;8. 652;9. 544;10. R;11. CGT	1. 0.44876;2. 204;3. 610;4. 211;5. 211;6. 631;7. 219;8. 655;9. 547;10. S;11. TCC	1. 0.96063;2. 208;3. 622;4. 215;5. 215;6. 643;7. 223;8. 667;9. 559;10. R;11. CGT	1. 0.93567;2. 221;3. 661;4. 228;5. 228;6. 682;7. 236;8. 706;9. 598;10. A;11. GCC	1. 0.73786;2. 238;3. 712;4. 245;5. 245;6. 733;7. 253;8. 757;9. 649;10. S;11. AGC	1. 0.41946;2. 241;3. 721;4. 250;5. 250;6. 748;7. 258;8. 772;9. 658;10. P;11. CCC	1. 0.94537;2. 244;3. 730;4. 253;5. 253;6. 757;7. 261;8. 781;9. 667;10. T;11. ACC	1. 0.43925;2. 245;3. 733;4. 254;5. 254;6. 760;7. 262;8. 784;9. 670;10. S;11. AGC	1. 0.72791;2. 246;3. 736;4. 255;5. 255;6. 763;7. 263;8. 787;9. 673;10. N;11. AAC	1. 0.71993;2. 247;3. 739;4. 256;5. 256;6. 766;7. 264;8. 790;9. 676;10. S;11. TCC
ERS451417_01323	1717.62.peg.1331	NA	NA	NA	0.03912	37	Cargentoratense_DSM44202,"Caurimucosum_ATCC700975","Cbelfantii_FRC0043","Ccallunae_DSM20147","Ccamporealensis_DSM44610","Cdeserti_GIMN1010","Cdiphtheriae_NCTC11397","Cdoosanense_DSM45436","Cefficiens_YS314","Cepidermidicanis_DSM45586","Cfalsenii_DSM44353","Cglutamicum_ATCC13032","Cglycinophilum_AJ3170","Chalotolerans_YIM70093","Chumireducens_DSM45392","Cimitans_DSM44264","Cjeikeium_K41","Ckroppen…	430.177	0.276432	1.52381	1	0.27646	1.52099	3076	6	1. 0.9631;2. 86;3. 256;4. 95;5. 95;6. 283;7. 102;8. 304;9. 151;10. I;11. ATT	1. 0.96148;2. 101;3. 301;4. 131;5. 131;6. 391;7. 138;8. 412;9. 190;10. Q;11. CAA	1. 0.96078;2. 116;3. 346;4. 146;5. 146;6. 436;7. 153;8. 457;9. 235;10. I;11. ATT	1. 0.99631;2. 123;3. 367;4. 153;5. 153;6. 457;7. 160;8. 478;9. 256;10. L;11. CTG	1. 0.9592;2. 147;3. 439;4. 177;5. 177;6. 529;7. 184;8. 550;9. 328;10. R;11. AGA	1. 0.99795;2. 152;3. 454;4. 182;5. 182;6. 544;7. 189;8. 565;9. 343;10. V;11. GTC
ERS451417_00520	1717.62.peg.524	NA	NA	NA	0.04016	7	Cbelfantii_FRC0043,"Cdiphtheriae_NCTC11397","Cpseudotuberculosis_31","Cpseudotuberculosis_ATCC19410","Csilvaticum_KL0182","Culcerans_NCTC12077","Culcerans_NCTC7910"	0.394891	0.262814	2.93921	0.304761	0.264166	2.93881	2	15	1. 0.49054;2. 352;3. 1054;4. 370;5. 369;6. 1105;7. 379;8. 1135;9. 982;10. K;11. AAA	1. 0.4023;2. 429;3. 1285;4. 448;5. 447;6. 1339;7. 457;8. 1369;9. 1213;10. I;11. ATC	1. 0.51078;2. 491;3. 1471;4. 514;5. 513;6. 1537;7. 523;8. 1567;9. 1393;10. H;11. CAC	1. 0.46681;2. 495;3. 1483;4. 518;5. 517;6. 1549;7. 527;8. 1579;9. 1405;10. I;11. ATC	1. 0.48049;2. 572;3. 1714;4. 603;5. 602;6. 1804;7. 612;8. 1834;9. 1630;10. F;11. TTC	1. 0.42506;2. 586;3. 1756;4. 617;5. 616;6. 1846;7. 626;8. 1876;9. 1672;10. A;11. GCA	1. 0.465;2. 616;3. 1846;4. 648;5. 647;6. 1939;7. 656;8. 1966;9. 1762;10. P;11. CCA	1. 0.42114;2. 688;3. 2062;4. 721;5. 720;6. 2158;7. 730;8. 2188;9. 1975;10. A;11. GCA	1. 0.56284;2. 697;3. 2089;4. 730;5. 729;6. 2185;7. 739;8. 2215;9. 2002;10. S;11. AGT	1. 0.83609;2. 698;3. 2092;4. 731;5. 730;6. 2188;7. 740;8. 2218;9. 2005;10. T;11. ACC	1. 0.90786;2. 846;3. 2536;4. 882;5. 878;6. 2632;7. 888;8. 2662;9. 2449;10. R;11. AGA	1. 0.87379;2. 849;3. 2545;4. 885;5. 881;6. 2641;7. 891;8. 2671;9. 2458;10. N;11. AAT	1. 0.56401;2. 850;3. 2548;4. 886;5. 882;6. 2644;7. 892;8. 2674;9. 2461;10. V;11. GTG	1. 0.5477;2. 974;3. 2920;4. 1013;5. 1006;6. 3016;7. 1016;8. 3046;9. 2785;10. I;11. ATA	1. 0.79098;2. 1064;3. 3190;4. 1112;5. 1096;6. 3286;7. 1106;8. 3316;9. 3055;10. A;11. GCT
ERS451417_00203	1717.62.peg.200	NA	NA	NA	0.04116	3	Caurimucosum_ATCC700975,"Cdiphtheriae_NCTC11397","Ckutscheri_DSM20755"	0.79637	0.209305	1.70632	0.414519	0.210145	1.68143	6274	16	1. 0.92595;2. 4;3. 10;4. 6;5. 6;6. 16;7. 6;8. 16;9. 4;10. Q;11. CAA	1. 0.94794;2. 50;3. 148;4. 59;5. 59;6. 175;7. 66;8. 196;9. 73;10. A;11. GCA	1. 0.94508;2. 111;3. 331;4. 130;5. 122;6. 364;7. 129;8. 385;9. 235;10. L;11. TTG	1. 0.91629;2. 150;3. 448;4. 182;5. 174;6. 520;7. 191;8. 571;9. 304;10. R;11. CGC	1. 0.92786;2. 206;3. 616;4. 239;5. 231;6. 691;7. 248;8. 742;9. 433;10. S;11. TCC	1. 0.95027;2. 207;3. 619;4. 240;5. 232;6. 694;7. 249;8. 745;9. 436;10. V;11. GTT	1. 0.93416;2. 253;3. 757;4. 290;5. 278;6. 832;7. 295;8. 883;9. 574;10. K;11. AAG	1. 0.9104;2. 294;3. 880;4. 332;5. 319;6. 955;7. 336;8. 1006;9. 658;10. H;11. CAT	1. 0.90053;2. 354;3. 1060;4. 402;5. 388;6. 1162;7. 409;8. 1225;9. 751;10. V;11. GTA	1. 0.97398;2. 377;3. 1129;4. 425;5. 411;6. 1231;7. 438;8. 1312;9. 769;10. K;11. AAG	1. 0.93705;2. 394;3. 1180;4. 445;5. 428;6. 1282;7. 455;8. 1363;9. 814;10. G;11. GGC	1. 0.906;2. 450;3. 1348;4. 508;5. 491;6. 1471;7. 523;8. 1567;9. 883;10. W;11. TGG	1. 0.9452;2. 455;3. 1363;4. 515;5. 496;6. 1486;7. 528;8. 1582;9. 898;10. P;11. CCG	1. 0.93891;2. 456;3. 1366;4. 516;5. 497;6. 1489;7. 529;8. 1585;9. 901;10. V;11. GTA	1. 0.95019;2. 483;3. 1447;4. 543;5. 524;6. 1570;7. 556;8. 1666;9. 982;10. T;11. ACC	1. 0.92223;2. 489;3. 1465;4. 549;5. 530;6. 1588;7. 562;8. 1684;9. 1000;10. P;11. CCA
ERS451417_00385	1717.62.peg.385	NA	NA	NA	0.04499	7	Cbelfantii_FRC0043,"Cdiphtheriae_NCTC11397","Cpseudotuberculosis_ATCC19410","Crouxii_FRC0190","Csilvaticum_KL0182","Culcerans_NCTC12077","Culcerans_NCTC7910"	0.790232	0.313402	3.36528	0.485802	0.317432	3.38104	2	2	1. 0.99001;2. 116;3. 346;4. 153;5. 133;6. 397;7. 139;8. 415;9. 217;10. L;11. CTC	1. 0.7933;2. 125;3. 373;4. 162;5. 142;6. 424;7. 148;8. 442;9. 244;10. I;11. ATC
1717.62.peg.1908	1717.62.peg.1908	NA	NA	NA	0.05151	12	Cargentoratense_DSM44202,"Ccallunae_DSM20147","Ccamporealensis_DSM44610","Cdeserti_GIMN1010","Cdiphtheriae_NCTC11397","Cepidermidicanis_DSM45586","Cfalsenii_DSM44353","Cglutamicum_ATCC13032","Ckroppenstedtii_DSM44385","Cmarinum_DSM44953","Ctestudinoris_DSM44614","Cuterequi_DSM45634"	0.470148	0.10205		0.99999	0.102401		4098	2	1. 0.83911;2. 142;3. 424;4. 142;5. 142;6. 424;7. 148;8. 442;9. 346;10. H;11. CAC	1. 0.82725;2. 192;3. 574;4. 192;5. 192;6. 574;7. 198;8. 592;9. 496;10. G;11. GGC
ERS451417_00424	1717.62.peg.424	NA	NA	NA	0.05936	3	Cdiphtheriae_NCTC11397,"Cimitans_DSM44264","Curealyticum_DSM7109"	48.8324	0.232308	1.19486	0.311282	0.220427	0.98687	5248	4	1. 0.85434;2. 3;3. 7;4. 29;5. 29;6. 85;7. 31;8. 91;9. 4;10. A;11. GCA	1. 0.47655;2. 25;3. 73;4. 52;5. 51;6. 151;7. 53;8. 157;9. 67;10. R;11. CGA	1. 0.89684;2. 39;3. 115;4. 66;5. 65;6. 193;7. 67;8. 199;9. 109;10. S;11. AGC	1. 0.61669;2. 40;3. 118;4. 67;5. 66;6. 196;7. 68;8. 202;9. 112;10. V;11. GTT
ERS451417_00255	1717.62.peg.250	NA	NA	NA	0.06073	12	Ccallunae_DSM20147,"Cdeserti_GIMN1010","Cdiphtheriae_NCTC11397","Cefficiens_YS314","Cfalsenii_DSM44353","Cglutamicum_ATCC13032","Cglycinophilum_AJ3170","Chalotolerans_YIM70093","Chumireducens_DSM45392","Cmarinum_DSM44953","Cmaris_DSM45190","Cvitaeruminis_DSM20294"	10.631	0.274555	1.93402	0.358602	0.274632	1.92986	4096	29	1. 0.91359;2. 58;3. 172;4. 86;5. 86;6. 256;7. 86;8. 256;9. 10;10. P;11. CCT	1. 0.85309;2. 85;3. 253;4. 125;5. 113;6. 337;7. 113;8. 337;9. 91;10. T;11. ACT	1. 0.79028;2. 117;3. 349;4. 159;5. 147;6. 439;7. 147;8. 439;9. 178;10. N;11. AAC	1. 0.40262;2. 136;3. 406;4. 179;5. 167;6. 499;7. 167;8. 499;9. 232;10. K;11. AAA	1. 0.96036;2. 139;3. 415;4. 182;5. 170;6. 508;7. 170;8. 508;9. 241;10. P;11. CCA	1. 0.90825;2. 152;3. 454;4. 195;5. 183;6. 547;7. 183;8. 547;9. 280;10. G;11. GGC	1. 0.48414;2. 200;3. 598;4. 243;5. 231;6. 691;7. 231;8. 691;9. 424;10. I;11. ATT	1. 0.52779;2. 201;3. 601;4. 244;5. 232;6. 694;7. 232;8. 694;9. 427;10. S;11. AGT	1. 0.70028;2. 232;3. 694;4. 277;5. 265;6. 793;7. 265;8. 793;9. 511;10. T;11. ACG	1. 0.4868;2. 247;3. 739;4. 292;5. 280;6. 838;7. 280;8. 838;9. 556;10. R;11. CGC	1. 0.94196;2. 256;3. 766;4. 301;5. 289;6. 865;7. 289;8. 865;9. 583;10. S;11. TCC	1. 0.76466;2. 259;3. 775;4. 304;5. 292;6. 874;7. 292;8. 874;9. 592;10. F;11. TTC	1. 0.60547;2. 263;3. 787;4. 308;5. 296;6. 886;7. 296;8. 886;9. 604;10. S;11. TCC	1. 0.89226;2. 268;3. 802;4. 313;5. 301;6. 901;7. 301;8. 901;9. 619;10. A;11. GCA	1. 0.87975;2. 269;3. 805;4. 314;5. 302;6. 904;7. 302;8. 904;9. 622;10. A;11. GCT	1. 0.63923;2. 279;3. 835;4. 324;5. 312;6. 934;7. 312;8. 934;9. 652;10. Q;11. CAA	1. 0.88186;2. 286;3. 856;4. 331;5. 319;6. 955;7. 319;8. 955;9. 673;10. Q;11. CAG	1. 0.93408;2. 299;3. 895;4. 345;5. 333;6. 997;7. 334;8. 1000;9. 694;10. Y;11. TAT	1. 0.49664;2. 323;3. 967;4. 369;5. 357;6. 1069;7. 359;8. 1075;9. 763;10. M;11. ATG	1. 0.96114;2. 328;3. 982;4. 375;5. 363;6. 1087;7. 364;8. 1090;9. 778;10. S;11. AGT	1. 0.75421;2. 364;3. 1090;4. 420;5. 408;6. 1222;7. 415;8. 1243;9. 862;10. S;11. TCA	1. 0.75419;2. 395;3. 1183;4. 451;5. 439;6. 1315;7. 446;8. 1336;9. 955;10. I;11. ATT	1. 0.85248;2. 398;3. 1192;4. 454;5. 442;6. 1324;7. 449;8. 1345;9. 964;10. A;11. GCT	1. 0.89892;2. 421;3. 1261;4. 477;5. 465;6. 1393;7. 472;8. 1414;9. 1033;10. F;11. TTT	1. 0.96077;2. 430;3. 1288;4. 486;5. 474;6. 1420;7. 481;8. 1441;9. 1060;10. E;11. GAA	1. 0.85409;2. 434;3. 1300;4. 490;5. 478;6. 1432;7. 485;8. 1453;9. 1072;10. T;11. ACT	1. 0.81219;2. 442;3. 1324;4. 498;5. 486;6. 1456;7. 493;8. 1477;9. 1096;10. S;11. TCT	1. 0.91464;2. 450;3. 1348;4. 506;5. 494;6. 1480;7. 501;8. 1501;9. 1120;10. T;11. ACC	1. 0.64358;2. 474;3. 1420;4. 538;5. 526;6. 1576;7. 534;8. 1600;9. 1171;10. L;11. CTA
ERS451417_01720	1717.62.peg.1723	NA	NA	NA	0.06942	20	Caurimucosum_ATCC700975,"Cbelfantii_FRC0043","Ccallunae_DSM20147","Cdeserti_GIMN1010","Cdiphtheriae_NCTC11397","Cdoosanense_DSM45436","Cefficiens_YS314","Cepidermidicanis_DSM45586","Cglutamicum_ATCC13032","Chalotolerans_YIM70093","Chumireducens_DSM45392","Cmarinum_DSM44953","Cpseudotuberculosis_31","Cpseudotuberculosis_ATCC19410","Csilvaticum_KL0182","Csingulare_IBSB52218","Ctestudinoris_DSM44614…	0.424433	0.245486	1.57828	0.247717	0.247717	1.57881	3074	6	1. 0.47519;2. 295;3. 883;4. 362;5. 338;6. 1012;7. 445;8. 1333;9. 484;10. H;11. CAT	1. 0.41188;2. 358;3. 1072;4. 428;5. 404;6. 1210;7. 510;8. 1528;9. 670;10. R;11. CGC	1. 0.41614;2. 429;3. 1285;4. 499;5. 475;6. 1423;7. 581;8. 1741;9. 883;10. N;11. AAT	1. 0.46655;2. 495;3. 1483;4. 565;5. 541;6. 1621;7. 647;8. 1939;9. 1081;10. I;11. ATT	1. 0.41033;2. 561;3. 1681;4. 663;5. 607;6. 1819;7. 713;8. 2137;9. 1279;10. M;11. ATG	1. 0.41228;2. 590;3. 1768;4. 692;5. 636;6. 1906;7. 742;8. 2224;9. 1366;10. H;11. CAT
ERS451417_02017	1717.62.peg.2022	NA	NA	NA	0.07038	38	Cargentoratense_DSM44202,"Catypicum_R2070","Caurimucosum_ATCC700975","Cbelfantii_FRC0043","Ccallunae_DSM20147","Ccamporealensis_DSM44610","Cdeserti_GIMN1010","Cdiphtheriae_NCTC11397","Cdoosanense_DSM45436","Cefficiens_YS314","Cepidermidicanis_DSM45586","Cfalsenii_DSM44353","Cglutamicum_ATCC13032","Cglycinophilum_AJ3170","Chalotolerans_YIM70093","Chumireducens_DSM45392","Cimitans_DSM44264","Cjeike…	10.0262	0.115866	2.02344	0.115966	0.115966	2.02032	256	0
ERS451417_02342	1717.62.peg.2369	NA	NA	NA	0.07466	3	Cdiphtheriae_NCTC11397,"Cepidermidicanis_DSM45586","Clactis_RW25"	0.290783	0.255121	1.51484	0.257437	0.257437	1.59541	4226	3	1. 0.53622;2. 309;3. 925;4. 320;5. 319;6. 955;7. 329;8. 985;9. 802;10. S;11. AGT	1. 0.5084;2. 430;3. 1288;4. 441;5. 440;6. 1318;7. 450;8. 1348;9. 1165;10. S;11. AGT	1. 0.46552;2. 517;3. 1549;4. 530;5. 527;6. 1579;7. 537;8. 1609;9. 1408;10. E;11. GAA
ERS451417_00518	1717.62.peg.522	NA	NA	NA	0.07564	9	Cbelfantii_FRC0043,"Cdiphtheriae_NCTC11397","Cjeikeium_K41","Clactis_RW25","Cpseudotuberculosis_31","Cpseudotuberculosis_ATCC19410","Csilvaticum_KL0182","Culcerans_NCTC12077","Culcerans_NCTC7910"	36.9309	0.0808008	3.44673	0.0857075	0.0857075	3.44598	256	0
ERS451417_02178	1717.62.peg.2204	NA	NA	NA	0.07564	14	Cargentoratense_DSM44202,"Ccamporealensis_DSM44610","Cdeserti_GIMN1010","Cdiphtheriae_NCTC11397","Cefficiens_YS314","Cglutamicum_ATCC13032","Cimitans_DSM44264","Ckutscheri_DSM20755","Clactis_RW25","Cmarinum_DSM44953","Cmaris_DSM45190","Cpseudotuberculosis_31","Csingulare_IBSB52218","Culcerans_NCTC7910"	1.15455	0.181522	1.81233	0.43525	0.181	1.80097	6144	25	1. 0.99002;2. 13;3. 37;4. 13;5. 13;6. 37;7. 13;8. 37;9. 28;10. I;11. ATT	1. 0.9846;2. 21;3. 61;4. 21;5. 21;6. 61;7. 21;8. 61;9. 52;10. H;11. CAC	1. 0.96933;2. 35;3. 103;4. 35;5. 35;6. 103;7. 35;8. 103;9. 94;10. R;11. CGG	1. 0.99642;2. 72;3. 214;4. 78;5. 78;6. 232;7. 82;8. 244;9. 160;10. C;11. TGC	1. 0.99236;2. 78;3. 232;4. 84;5. 84;6. 250;7. 88;8. 262;9. 178;10. C;11. TGC	1. 0.99559;2. 97;3. 289;4. 103;5. 103;6. 307;7. 108;8. 322;9. 199;10. A;11. GCT	1. 0.92281;2. 105;3. 313;4. 111;5. 111;6. 331;7. 116;8. 346;9. 223;10. I;11. ATT	1. 0.98921;2. 109;3. 325;4. 115;5. 115;6. 343;7. 120;8. 358;9. 235;10. A;11. GCG	1. 0.96899;2. 138;3. 412;4. 183;5. 163;6. 487;7. 175;8. 523;9. 280;10. L;11. CTG	1. 0.99813;2. 213;3. 637;4. 277;5. 257;6. 769;7. 274;8. 820;9. 439;10. A;11. GCT	1. 0.99525;2. 214;3. 640;4. 278;5. 258;6. 772;7. 275;8. 823;9. 442;10. S;11. AGT	1. 0.99486;2. 239;3. 715;4. 303;5. 283;6. 847;7. 300;8. 898;9. 517;10. S;11. TCC	1. 0.98755;2. 263;3. 787;4. 327;5. 307;6. 919;7. 324;8. 970;9. 589;10. Y;11. TAT	1. 0.99292;2. 264;3. 790;4. 328;5. 308;6. 922;7. 325;8. 973;9. 592;10. Q;11. CAG	1. 0.99441;2. 268;3. 802;4. 332;5. 312;6. 934;7. 329;8. 985;9. 604;10. F;11. TTT	1. 0.99184;2. 274;3. 820;4. 338;5. 318;6. 952;7. 335;8. 1003;9. 622;10. I;11. ATT	1. 0.98331;2. 305;3. 913;4. 372;5. 352;6. 1054;7. 371;8. 1111;9. 670;10. A;11. GCC	1. 0.99859;2. 309;3. 925;4. 376;5. 356;6. 1066;7. 375;8. 1123;9. 682;10. E;11. GAA	1. 0.97306;2. 327;3. 979;4. 394;5. 374;6. 1120;7. 393;8. 1177;9. 736;10. K;11. AAA	1. 0.9932;2. 328;3. 982;4. 395;5. 375;6. 1123;7. 394;8. 1180;9. 739;10. A;11. GCT	1. 0.99475;2. 331;3. 991;4. 398;5. 378;6. 1132;7. 397;8. 1189;9. 748;10. F;11. TTT	1. 0.99889;2. 336;3. 1006;4. 403;5. 383;6. 1147;7. 402;8. 1204;9. 763;10. V;11. GTG	1. 0.96919;2. 371;3. 1111;4. 455;5. 435;6. 1303;7. 454;8. 1360;9. 832;10. L;11. CTT	1. 0.99767;2. 375;3. 1123;4. 459;5. 439;6. 1315;7. 458;8. 1372;9. 844;10. C;11. TGT	1. 0.99314;2. 384;3. 1150;4. 486;5. 448;6. 1342;7. 468;8. 1402;9. 871;10. G;11. GGT
ERS451417_00368	1717.62.peg.367	NA	NA	NA	0.07614	3	Cbelfantii_FRC0043,"Cdiphtheriae_NCTC11397","Crouxii_FRC0190"	1.26375	0.14676	3.91333	0.177879	0.163813	3.97907	128	3	1. 0.68431;2. 183;3. 547;4. 362;5. 183;6. 547;7. 183;8. 547;9. 547;10. L;11. TTA	1. 0.52364;2. 255;3. 763;4. 558;5. 259;6. 775;7. 259;8. 775;9. 724;10. Q;11. CAA	1. 0.46487;2. 290;3. 868;4. 619;5. 299;6. 895;7. 303;8. 907;9. 817;10. A;11. GCG
ERS451417_00877	1717.62.peg.883	NA	NA	NA	0.07915	39	Cargentoratense_DSM44202,"Catypicum_R2070","Caurimucosum_ATCC700975","Cbelfantii_FRC0043","Ccallunae_DSM20147","Ccamporealensis_DSM44610","Cdeserti_GIMN1010","Cdiphtheriae_NCTC11397","Cdoosanense_DSM45436","Cefficiens_YS314","Cepidermidicanis_DSM45586","Cfalsenii_DSM44353","Cglutamicum_ATCC13032","Cglycinophilum_AJ3170","Chalotolerans_YIM70093","Chumireducens_DSM45392","Cimitans_DSM44264","Cjeike…	0.337583	0.159896	1.74943	0.159929	0.159929	1.74737	3074	4	1. 0.91079;2. 68;3. 202;4. 85;5. 85;6. 253;7. 104;8. 310;9. 91;10. Q;11. CAA	1. 0.65939;2. 127;3. 379;4. 154;5. 154;6. 460;7. 186;8. 556;9. 226;10. T;11. ACT	1. 0.68508;2. 176;3. 526;4. 206;5. 206;6. 616;7. 252;8. 754;9. 328;10. G;11. GGT	1. 0.56106;2. 193;3. 577;4. 223;5. 223;6. 667;7. 269;8. 805;9. 379;10. A;11. GCG
ERS451417_02176	1717.62.peg.2202	NA	NA	NA	0.08827	4	Cdiphtheriae_NCTC11397,"Cpseudotuberculosis_31","Csilvaticum_KL0182","Culcerans_NCTC12077"	3.47695	0.042938	3.73488	0.489351	0.0388695	3.60133	6656	42	1. 0.93313;2. 24;3. 70;4. 69;5. 25;6. 73;7. 25;8. 73;9. 1;10. R;11. CGC	1. 0.93479;2. 28;3. 82;4. 73;5. 29;6. 85;7. 29;8. 85;9. 13;10. A;11. GCC	1. 0.98235;2. 31;3. 91;4. 87;5. 32;6. 94;7. 32;8. 94;9. 22;10. C;11. TGC	1. 0.97162;2. 35;3. 103;4. 94;5. 36;6. 106;7. 36;8. 106;9. 34;10. S;11. AGT	1. 0.97156;2. 36;3. 106;4. 95;5. 37;6. 109;7. 37;8. 109;9. 37;10. G;11. GGC	1. 0.94778;2. 39;3. 115;4. 98;5. 40;6. 118;7. 40;8. 118;9. 46;10. Q;11. CAA	1. 0.97919;2. 47;3. 139;4. 106;5. 48;6. 142;7. 48;8. 142;9. 64;10. A;11. GCC	1. 0.9658;2. 48;3. 142;4. 107;5. 49;6. 145;7. 49;8. 145;9. 67;10. D;11. GAC	1. 0.96838;2. 50;3. 148;4. 109;5. 51;6. 151;7. 51;8. 151;9. 73;10. T;11. ACC	1. 0.90714;2. 51;3. 151;4. 110;5. 52;6. 154;7. 52;8. 154;9. 76;10. S;11. AGC	1. 0.96648;2. 59;3. 175;4. 118;5. 60;6. 178;7. 60;8. 178;9. 100;10. Y;11. TAC	1. 0.97012;2. 69;3. 205;4. 128;5. 70;6. 208;7. 70;8. 208;9. 130;10. A;11. GCG	1. 0.96373;2. 77;3. 229;4. 136;5. 78;6. 232;7. 78;8. 232;9. 154;10. S;11. TCC	1. 0.97781;2. 87;3. 259;4. 147;5. 88;6. 262;7. 88;8. 262;9. 184;10. H;11. CAC	1. 0.94361;2. 88;3. 262;4. 148;5. 89;6. 265;7. 89;8. 265;9. 187;10. E;11. GAG	1. 0.9712;2. 90;3. 268;4. 150;5. 91;6. 271;7. 91;8. 271;9. 193;10. S;11. TCA	1. 0.97981;2. 91;3. 271;4. 151;5. 92;6. 274;7. 92;8. 274;9. 196;10. S;11. TCA	1. 0.98527;2. 92;3. 274;4. 152;5. 93;6. 277;7. 93;8. 277;9. 199;10. F;11. TTT	1. 0.98317;2. 97;3. 289;4. 157;5. 98;6. 292;7. 98;8. 292;9. 214;10. A;11. GCC	1. 0.9698;2. 99;3. 295;4. 159;5. 100;6. 298;7. 100;8. 298;9. 220;10. A;11. GCC	1. 0.94638;2. 100;3. 298;4. 160;5. 101;6. 301;7. 101;8. 301;9. 223;10. H;11. CAT	1. 0.94111;2. 110;3. 328;4. 177;5. 111;6. 331;7. 111;8. 331;9. 253;10. A;11. GCT	1. 0.92682;2. 137;3. 409;4. 221;5. 140;6. 418;7. 154;8. 460;9. 277;10. R;11. CGC	1. 0.9384;2. 143;3. 427;4. 227;5. 146;6. 436;7. 160;8. 478;9. 295;10. A;11. GCC	1. 0.93248;2. 148;3. 442;4. 260;5. 151;6. 451;7. 165;8. 493;9. 310;10. A;11. GCG	1. 0.98246;2. 151;3. 451;4. 263;5. 154;6. 460;7. 168;8. 502;9. 319;10. Q;11. CAG	1. 0.92881;2. 155;3. 463;4. 267;5. 158;6. 472;7. 172;8. 514;9. 331;10. D;11. GAT	1. 0.97208;2. 158;3. 472;4. 270;5. 161;6. 481;7. 175;8. 523;9. 340;10. R;11. CGG	1. 0.97266;2. 159;3. 475;4. 271;5. 162;6. 484;7. 176;8. 526;9. 343;10. Y;11. TAT	1. 0.9299;2. 163;3. 487;4. 275;5. 166;6. 496;7. 180;8. 538;9. 355;10. R;11. CGT	1. 0.93558;2. 168;3. 502;4. 319;5. 171;6. 511;7. 185;8. 553;9. 370;10. F;11. TTC	1. 0.96866;2. 170;3. 508;4. 321;5. 173;6. 517;7. 187;8. 559;9. 376;10. P;11. CCG	1. 0.95771;2. 179;3. 535;4. 336;5. 182;6. 544;7. 196;8. 586;9. 403;10. K;11. AAG	1. 0.95062;2. 182;3. 544;4. 339;5. 185;6. 553;7. 199;8. 595;9. 412;10. N;11. AAC
ERS451417_01564	1717.62.peg.1573	NA	NA	NA	0.08852	4	Caurimucosum_ATCC700975,"Ccamporealensis_DSM44610","Cdiphtheriae_NCTC11397","Csimulans_PES1"	0.684303	0.0619915	2.12275	0.0940978	0.063695	2.06884	4098	5	1. 0.91126;2. 18;3. 52;4. 18;5. 18;6. 52;7. 18;8. 52;9. 52;10. R;11. CGC	1. 0.54952;2. 19;3. 55;4. 19;5. 19;6. 55;7. 19;8. 55;9. 55;10. T;11. ACC	1. 0.58314;2. 26;3. 76;4. 26;5. 26;6. 76;7. 26;8. 76;9. 76;10. S;11. TCC	1. 0.64926;2. 37;3. 109;4. 37;5. 37;6. 109;7. 37;8. 109;9. 109;10. V;11. GTC	1. 0.8926;2. 64;3. 190;4. 64;5. 64;6. 190;7. 64;8. 190;9. 190;10. L;11. TTG
ERS451417_00406	1717.62.peg.406	NA	NA	NA	0.09201	3	Cbelfantii_FRC0043,"Cdiphtheriae_NCTC11397","Crouxii_FRC0190"	0.285649	0.0948628	2.90691	0.143909	0.100849	2.91639	2178	4	1. 0.89646;2. 173;3. 517;4. 223;5. 205;6. 613;7. 205;8. 613;9. 517;10. N;11. AAT	1. 0.66005;2. 199;3. 595;4. 282;5. 231;6. 691;7. 231;8. 691;9. 595;10. S;11. TCC	1. 0.617;2. 387;3. 1159;4. 497;5. 419;6. 1255;7. 419;8. 1255;9. 1159;10. A;11. GCT	1. 0.66363;2. 394;3. 1180;4. 504;5. 426;6. 1276;7. 426;8. 1276;9. 1180;10. E;11. GAA
ERS451417_01124	1717.62.peg.1136	NA	NA	NA	0.09936	4	Cdeserti_GIMN1010,"Cdiphtheriae_NCTC11397","Ckroppenstedtii_DSM44385","Clactis_RW25"	0.673805	0.292665	1.37105	0.301309	0.301309	1.40182	4098	3	1. 0.56144;2. 9;3. 25;4. 11;5. 11;6. 31;7. 11;8. 31;9. 25;10. R;11. CGA	1. 0.61451;2. 14;3. 40;4. 16;5. 16;6. 46;7. 16;8. 46;9. 40;10. Q;11. CAA	1. 0.85099;2. 86;3. 256;4. 91;5. 91;6. 271;7. 96;8. 286;9. 232;10. P;11. CCA
ERS451417_00421	1717.62.peg.421	NA	NA	NA	0.1037	14	Catypicum_R2070,"Ccamporealensis_DSM44610","Cdiphtheriae_NCTC11397","Cdoosanense_DSM45436","Cefficiens_YS314","Cglutamicum_ATCC13032","Chalotolerans_YIM70093","Ckutscheri_DSM20755","Cmarinum_DSM44953","Cmaris_DSM45190","Csimulans_PES1","Ctestudinoris_DSM44614","Cuterequi_DSM45634","Cvitaeruminis_DSM20294"	13.815	0.112399	1.61509	0.146912	0.112011	1.61987	4096	10	1. 0.73634;2. 54;3. 160;4. 69;5. 56;6. 166;7. 56;8. 166;9. 160;10. Y;11. TAC	1. 0.68291;2. 67;3. 199;4. 82;5. 69;6. 205;7. 69;8. 205;9. 199;10. T;11. ACC	1. 0.88852;2. 69;3. 205;4. 84;5. 71;6. 211;7. 71;8. 211;9. 205;10. D;11. GAT	1. 0.93163;2. 87;3. 259;4. 102;5. 89;6. 265;7. 89;8. 265;9. 259;10. L;11. TTG	1. 0.96832;2. 282;3. 844;4. 301;5. 288;6. 862;7. 288;8. 862;9. 829;10. S;11. AGC	1. 0.87159;2. 285;3. 853;4. 304;5. 291;6. 871;7. 291;8. 871;9. 838;10. Q;11. CAA	1. 0.85262;2. 316;3. 946;4. 335;5. 322;6. 964;7. 322;8. 964;9. 928;10. N;11. AAT	1. 0.60711;2. 335;3. 1003;4. 354;5. 341;6. 1021;7. 341;8. 1021;9. 985;10. A;11. GCG	1. 0.69256;2. 423;3. 1267;4. 442;5. 429;6. 1285;7. 429;8. 1285;9. 1249;10. S;11. TCT	1. 0.79852;2. 429;3. 1285;4. 448;5. 435;6. 1303;7. 435;8. 1303;9. 1267;10. N;11. AAC
ERS451417_00174	1717.62.peg.172	NA	NA	NA	0.1051	7	Cdiphtheriae_NCTC11397,"Ckutscheri_DSM20755","Cpseudotuberculosis_31","Cpseudotuberculosis_ATCC19410","Csilvaticum_KL0182","Culcerans_NCTC12077","Culcerans_NCTC7910"	0.335741	0.144837	2.93261	0.188493	0.147189	2.88957	4098	10	1. 0.61053;2. 30;3. 88;4. 39;5. 39;6. 115;7. 43;8. 127;9. 67;10. R;11. CGG	1. 0.92474;2. 83;3. 247;4. 92;5. 92;6. 274;7. 96;8. 286;9. 226;10. Q;11. CAG	1. 0.85252;2. 97;3. 289;4. 106;5. 106;6. 316;7. 110;8. 328;9. 268;10. G;11. GGT	1. 0.62289;2. 117;3. 349;4. 126;5. 126;6. 376;7. 130;8. 388;9. 328;10. F;11. TTT	1. 0.71662;2. 208;3. 622;4. 219;5. 219;6. 655;7. 223;8. 667;9. 601;10. R;11. CGT	1. 0.91409;2. 252;3. 754;4. 263;5. 263;6. 787;7. 267;8. 799;9. 733;10. V;11. GTG	1. 0.8968;2. 253;3. 757;4. 264;5. 264;6. 790;7. 268;8. 802;9. 736;10. E;11. GAG	1. 0.40795;2. 280;3. 838;4. 291;5. 291;6. 871;7. 295;8. 883;9. 817;10. R;11. CGT	1. 0.50606;2. 305;3. 913;4. 317;5. 317;6. 949;7. 321;8. 961;9. 892;10. E;11. GAG	1. 0.83735;2. 322;3. 964;4. 334;5. 334;6. 1000;7. 338;8. 1012;9. 943;10. A;11. GCG
ERS451417_02332	1717.62.peg.2359	NA	NA	NA	0.1065	7	Cbelfantii_FRC0043,"Cdiphtheriae_NCTC11397","Cepidermidicanis_DSM45586","Clactis_RW25","Cmarinum_DSM44953","Cuterequi_DSM45634","Cvitaeruminis_DSM20294"	0.289989	0.110486	1.59268	0.156894	0.112192	1.60256	2	12	1. 0.90023;2. 91;3. 271;4. 97;5. 97;6. 289;7. 97;8. 289;9. 262;10. A;11. GCG	1. 0.59729;2. 93;3. 277;4. 99;5. 99;6. 295;7. 99;8. 295;9. 268;10. E;11. GAG	1. 0.93461;2. 95;3. 283;4. 101;5. 101;6. 301;7. 101;8. 301;9. 274;10. T;11. ACT	1. 0.76786;2. 146;3. 436;4. 152;5. 152;6. 454;7. 152;8. 454;9. 427;10. H;11. CAC	1. 0.92876;2. 150;3. 448;4. 156;5. 156;6. 466;7. 156;8. 466;9. 439;10. R;11. CGC	1. 0.7513;2. 151;3. 451;4. 157;5. 157;6. 469;7. 157;8. 469;9. 442;10. D;11. GAC	1. 0.8808;2. 211;3. 631;4. 217;5. 217;6. 649;7. 217;8. 649;9. 622;10. H;11. CAT	1. 0.68206;2. 216;3. 646;4. 222;5. 222;6. 664;7. 222;8. 664;9. 637;10. A;11. GCG	1. 0.87676;2. 256;3. 766;4. 262;5. 262;6. 784;7. 262;8. 784;9. 757;10. R;11. CGC	1. 0.7381;2. 273;3. 817;4. 279;5. 279;6. 835;7. 279;8. 835;9. 808;10. R;11. CGT	1. 0.70148;2. 282;3. 844;4. 288;5. 288;6. 862;7. 288;8. 862;9. 835;10. S;11. AGT	1. 0.76443;2. 324;3. 970;4. 331;5. 331;6. 991;7. 331;8. 991;9. 958;10. R;11. CGC
ERS451417_02064	1717.62.peg.2076	NA	NA	NA	0.1072	7	Cbelfantii_FRC0043,"Cdiphtheriae_NCTC11397","Cpseudotuberculosis_31","Cpseudotuberculosis_ATCC19410","Csilvaticum_KL0182","Culcerans_NCTC12077","Culcerans_NCTC7910"	0.450601	0.0680892	3.38787	0.136212	0.0691305	3.3328	2	5	1. 0.75356;2. 146;3. 436;4. 146;5. 146;6. 436;7. 146;8. 436;9. 436;10. V;11. GTG	1. 0.54433;2. 167;3. 499;4. 167;5. 167;6. 499;7. 167;8. 499;9. 499;10. S;11. TCT	1. 0.9815;2. 278;3. 832;4. 290;5. 290;6. 868;7. 291;8. 871;9. 823;10. D;11. GAC	1. 0.62716;2. 279;3. 835;4. 291;5. 291;6. 871;7. 292;8. 874;9. 826;10. K;11. AAG	1. 0.75972;2. 292;3. 874;4. 304;5. 304;6. 910;7. 305;8. 913;9. 865;10. A;11. GCG
ERS451417_01894	1717.62.peg.1893	NA	NA	NA	0.1145	38	Cargentoratense_DSM44202,"Catypicum_R2070","Caurimucosum_ATCC700975","Cbelfantii_FRC0043","Ccallunae_DSM20147","Ccamporealensis_DSM44610","Cdeserti_GIMN1010","Cdiphtheriae_NCTC11397","Cdoosanense_DSM45436","Cefficiens_YS314","Cepidermidicanis_DSM45586","Cfalsenii_DSM44353","Cglutamicum_ATCC13032","Cglycinophilum_AJ3170","Chalotolerans_YIM70093","Chumireducens_DSM45392","Cimitans_DSM44264","Cjeike…	0.159625	0.159625	1.94092	0.482585	0.15935	1.94145	258	0
ERS451417_00535	1717.62.peg.539	NA	NA	NA	0.1205	6	Cdiphtheriae_NCTC11397,"Cdoosanense_DSM45436","Cimitans_DSM44264","Cmustelae_DSM45274","Cureicelerivorans_IMMIBRIV2301","Cvitaeruminis_DSM20294"	9.2297	0.17053	1.52588	0.33718	0.162101	1.55165	6144	53	1. 0.66908;2. 34;3. 100;4. 85;5. 35;6. 103;7. 39;8. 115;9. 58;10. R;11. CGG	1. 0.60582;2. 42;3. 124;4. 93;5. 43;6. 127;7. 47;8. 139;9. 82;10. R;11. CGT	1. 0.59987;2. 53;3. 157;4. 104;5. 54;6. 160;7. 58;8. 172;9. 115;10. L;11. CTA	1. 0.79036;2. 55;3. 163;4. 106;5. 56;6. 166;7. 60;8. 178;9. 121;10. K;11. AAA	1. 0.51265;2. 58;3. 172;4. 109;5. 59;6. 175;7. 63;8. 187;9. 130;10. L;11. CTT	1. 0.93497;2. 62;3. 184;4. 113;5. 63;6. 187;7. 67;8. 199;9. 142;10. E;11. GAA	1. 0.73896;2. 70;3. 208;4. 121;5. 71;6. 211;7. 75;8. 223;9. 166;10. S;11. AGC	1. 0.43033;2. 79;3. 235;4. 130;5. 80;6. 238;7. 84;8. 250;9. 193;10. E;11. GAA	1. 0.77098;2. 83;3. 247;4. 134;5. 84;6. 250;7. 88;8. 262;9. 205;10. R;11. CGT	1. 0.40244;2. 85;3. 253;4. 136;5. 86;6. 256;7. 90;8. 268;9. 211;10. I;11. ATC	1. 0.8058;2. 95;3. 283;4. 146;5. 96;6. 286;7. 100;8. 298;9. 241;10. A;11. GCT	1. 0.90372;2. 109;3. 325;4. 160;5. 110;6. 328;7. 114;8. 340;9. 283;10. A;11. GCC	1. 0.83133;2. 127;3. 379;4. 179;5. 128;6. 382;7. 132;8. 394;9. 331;10. K;11. AAA	1. 0.80647;2. 159;3. 475;4. 216;5. 163;6. 487;7. 166;8. 496;9. 400;10. A;11. GCC	1. 0.85349;2. 185;3. 553;4. 242;5. 189;6. 565;7. 192;8. 574;9. 478;10. H;11. CAC	1. 0.41006;2. 187;3. 559;4. 244;5. 191;6. 571;7. 194;8. 580;9. 484;10. Q;11. CAA	1. 0.92243;2. 188;3. 562;4. 245;5. 192;6. 574;7. 195;8. 583;9. 487;10. T;11. ACA	1. 0.94909;2. 189;3. 565;4. 246;5. 193;6. 577;7. 196;8. 586;9. 490;10. C;11. TGT	1. 0.48451;2. 200;3. 598;4. 257;5. 204;6. 610;7. 207;8. 619;9. 523;10. I;11. ATA	1. 0.674;2. 202;3. 604;4. 259;5. 206;6. 616;7. 209;8. 625;9. 529;10. L;11. CTT	1. 0.4233;2. 204;3. 610;4. 264;5. 208;6. 622;7. 211;8. 631;9. 535;10. D;11. GAT	1. 0.941;2. 217;3. 649;4. 277;5. 221;6. 661;7. 224;8. 670;9. 574;10. W;11. TGG	1. 0.72754;2. 224;3. 670;4. 284;5. 228;6. 682;7. 231;8. 691;9. 595;10. T;11. ACA	1. 0.6492;2. 225;3. 673;4. 285;5. 229;6. 685;7. 232;8. 694;9. 598;10. Q;11. CAG	1. 0.92953;2. 229;3. 685;4. 289;5. 233;6. 697;7. 236;8. 706;9. 610;10. S;11. AGT	1. 0.43119;2. 232;3. 694;4. 293;5. 236;6. 706;7. 239;8. 715;9. 619;10. T;11. ACG	1. 0.65347;2. 235;3. 703;4. 296;5. 239;6. 715;7. 242;8. 724;9. 628;10. I;11. ATC	1. 0.92848;2. 266;3. 796;4. 327;5. 270;6. 808;7. 273;8. 817;9. 721;10. T;11. ACT	1. 0.44497;2. 292;3. 874;4. 360;5. 303;6. 907;7. 306;8. 916;9. 733;10. T;11. ACT	1. 0.42919;2. 297;3. 889;4. 365;5. 308;6. 922;7. 311;8. 931;9. 748;10. G;11. GGT	1. 0.85781;2. 305;3. 913;4. 373;5. 316;6. 946;7. 319;8. 955;9. 772;10. S;11. AGC	1. 0.93851;2. 337;3. 1009;4. 434;5. 356;6. 1066;7. 365;8. 1093;9. 823;10. Y;11. TAT	1. 0.80406;2. 343;3. 1027;4. 440;5. 362;6. 1084;7. 371;8. 1111;9. 841;10. S;11. TCG	1. 0.91333;2. 371;3. 1111;4. 470;5. 390;6. 1168;7. 400;8. 1198;9. 883;10. P;11. CCA
ERS451417_01523	1717.62.peg.1532	NA	NA	NA	0.1424	35	Cargentoratense_DSM44202,"Catypicum_R2070","Caurimucosum_ATCC700975","Cbelfantii_FRC0043","Ccallunae_DSM20147","Ccamporealensis_DSM44610","Cdeserti_GIMN1010","Cdiphtheriae_NCTC11397","Cdoosanense_DSM45436","Cefficiens_YS314","Cepidermidicanis_DSM45586","Cfalsenii_DSM44353","Cglutamicum_ATCC13032","Cglycinophilum_AJ3170","Chalotolerans_YIM70093","Chumireducens_DSM45392","Cimitans_DSM44264","Cjeike…	0.239008	0.0671112	1.98542	0.0900273	0.0671196	1.9823	2	1	1. 0.72502;2. 186;3. 556;4. 189;5. 189;6. 565;7. 201;8. 601;9. 454;10. D;11. GAC
ERS451417_01406	1717.62.peg.1419	NA	NA	NA	0.1562	10	Cbelfantii_FRC0043,"Cdiphtheriae_NCTC11397","Ckutscheri_DSM20755","Cmustelae_DSM45274","Cpseudotuberculosis_31","Cpseudotuberculosis_ATCC19410","Csilvaticum_KL0182","Culcerans_NCTC12077","Culcerans_NCTC7910","Cvitaeruminis_DSM20294"	2.38833	0.137576	1.79433	0.141364	0.141364	1.78688	2048	3	1. 0.46587;2. 49;3. 145;4. 79;5. 54;6. 160;7. 58;8. 172;9. 58;10. N;11. AAC	1. 0.82321;2. 114;3. 340;4. 164;5. 119;6. 355;7. 124;8. 370;9. 250;10. R;11. AGA	1. 0.48091;2. 147;3. 439;4. 197;5. 152;6. 454;7. 157;8. 469;9. 349;10. V;11. GTT
ERS451417_00179	1717.62.peg.175	NA	NA	NA	0.1567	39	Cargentoratense_DSM44202,"Catypicum_R2070","Caurimucosum_ATCC700975","Cbelfantii_FRC0043","Ccallunae_DSM20147","Ccamporealensis_DSM44610","Cdeserti_GIMN1010","Cdiphtheriae_NCTC11397","Cdoosanense_DSM45436","Cefficiens_YS314","Cepidermidicanis_DSM45586","Cfalsenii_DSM44353","Cglutamicum_ATCC13032","Cglycinophilum_AJ3170","Chalotolerans_YIM70093","Chumireducens_DSM45392","Cimitans_DSM44264","Cjeike…	0.32847	0.230165	1.61504	0.248849	0.230075	1.61493	2	3	1. 0.64752;2. 57;3. 169;4. 88;5. 88;6. 262;7. 101;8. 301;9. 106;10. D;11. GAT	1. 0.9237;2. 165;3. 493;4. 204;5. 204;6. 610;7. 220;8. 658;9. 418;10. G;11. GGG	1. 0.7015;2. 399;3. 1195;4. 440;5. 440;6. 1318;7. 456;8. 1366;9. 1120;10. T;11. ACA
ERS451417_02172	1717.62.peg.2198	NA	NA	NA	0.1603	4	Cbelfantii_FRC0043,"Cdiphtheriae_NCTC11397","Cglycinophilum_AJ3170","Cureicelerivorans_IMMIBRIV2301"	1	0.0989042	1.96337	0.104256	0.104256	1.93919	256	0
ERS451417_02059	1717.62.peg.2071	NA	NA	NA	0.166	38	Cargentoratense_DSM44202,"Catypicum_R2070","Caurimucosum_ATCC700975","Cbelfantii_FRC0043","Ccallunae_DSM20147","Ccamporealensis_DSM44610","Cdeserti_GIMN1010","Cdiphtheriae_NCTC11397","Cdoosanense_DSM45436","Cefficiens_YS314","Cepidermidicanis_DSM45586","Cfalsenii_DSM44353","Cglutamicum_ATCC13032","Cglycinophilum_AJ3170","Chalotolerans_YIM70093","Chumireducens_DSM45392","Cimitans_DSM44264","Cjeike…	0.296305	0.175367	1.95952	0.234391	0.175345	1.95961	2	6	1. 0.51519;2. 68;3. 202;4. 91;5. 91;6. 271;7. 119;8. 355;9. 151;10. S;11. AGC	1. 0.58505;2. 75;3. 223;4. 98;5. 98;6. 292;7. 126;8. 376;9. 172;10. I;11. ATC	1. 0.4985;2. 78;3. 232;4. 101;5. 101;6. 301;7. 129;8. 385;9. 181;10. V;11. GTC	1. 0.57597;2. 98;3. 292;4. 121;5. 121;6. 361;7. 149;8. 445;9. 241;10. L;11. CTC	1. 0.7089;2. 297;3. 889;4. 326;5. 326;6. 976;7. 366;8. 1096;9. 745;10. L;11. CTA	1. 0.98837;2. 335;3. 1003;4. 364;5. 364;6. 1090;7. 404;8. 1210;9. 859;10. Y;11. TAC
ERS451417_00059	1717.62.peg.54	NA	NA	NA	0.1711	3	Cdiphtheriae_NCTC11397,"Cmaris_DSM45190","Crouxii_FRC0190"	1.10013	0.387227	4.65325	0.506436	0.41121	5.44526	4224	6	1. 0.62629;2. 21;3. 61;4. 37;5. 22;6. 64;7. 22;8. 64;9. 55;10. S;11. TCC	1. 0.82179;2. 38;3. 112;4. 54;5. 39;6. 115;7. 39;8. 115;9. 106;10. T;11. ACT	1. 0.62952;2. 41;3. 121;4. 57;5. 42;6. 124;7. 42;8. 124;9. 115;10. T;11. ACC	1. 0.44474;2. 52;3. 154;4. 71;5. 53;6. 157;7. 53;8. 157;9. 148;10. A;11. GCA	1. 0.68457;2. 124;3. 370;4. 146;5. 125;6. 373;7. 125;8. 373;9. 364;10. A;11. GCT	1. 0.41318;2. 126;3. 376;4. 148;5. 127;6. 379;7. 127;8. 379;9. 370;10. F;11. TTT
ERS451417_01337	1717.62.peg.1345	NA	NA	NA	0.1835	6	Cdiphtheriae_NCTC11397,"Cpseudotuberculosis_31","Cpseudotuberculosis_ATCC19410","Csilvaticum_KL0182","Culcerans_NCTC12077","Culcerans_NCTC7910"	6.44609	0.309722	4.57442	0.498448	0.319084	4.52086	4096	1	1. 0.90152;2. 32;3. 94;4. 84;5. 43;6. 127;7. 43;8. 127;9. 64;10. C;11. TGT
ERS451417_00301	1717.62.peg.302	NA	NA	NA	0.1929	8	Cbelfantii_FRC0043,"Cdiphtheriae_NCTC11397","Cpseudotuberculosis_31","Cpseudotuberculosis_ATCC19410","Crouxii_FRC0190","Csilvaticum_KL0182","Culcerans_NCTC12077","Culcerans_NCTC7910"	0.137692	0.137692	2.59953	0.11327	0.11327	2.473	2	1	1. 0.42163;2. 121;3. 361;4. 246;5. 141;6. 421;7. 143;8. 427;9. 340;10. N;11. AAT
ERS451417_00416	1717.62.peg.416	NA	NA	NA	0.2086	3	Cdiphtheriae_NCTC11397,"CriegeliiPUDD83A45","Cvitaeruminis_DSM20294"	138.727	0.215836	0.66072	0.311109	0.218209	0.70748	4480	0
ERS451417_00159	1717.62.peg.157	NA	NA	NA	0.209	5	Cdiphtheriae_NCTC11397,"Cpseudotuberculosis_31","Cpseudotuberculosis_ATCC19410","Culcerans_NCTC12077","Culcerans_NCTC7910"	7.37541	0.215268	4.6799	0.311045	0.215429	4.59494	4096	30	1. 0.82853;2. 20;3. 58;4. 21;5. 21;6. 61;7. 29;8. 85;9. 13;10. S;11. AGT	1. 0.46908;2. 21;3. 61;4. 22;5. 22;6. 64;7. 30;8. 88;9. 16;10. A;11. GCT	1. 0.74529;2. 26;3. 76;4. 27;5. 27;6. 79;7. 35;8. 103;9. 31;10. T;11. ACG	1. 0.72227;2. 30;3. 88;4. 31;5. 31;6. 91;7. 39;8. 115;9. 43;10. T;11. ACG	1. 0.90011;2. 31;3. 91;4. 32;5. 32;6. 94;7. 40;8. 118;9. 46;10. L;11. CTG	1. 0.89074;2. 37;3. 109;4. 41;5. 41;6. 121;7. 46;8. 136;9. 64;10. E;11. GAA	1. 0.83803;2. 42;3. 124;4. 46;5. 46;6. 136;7. 54;8. 160;9. 73;10. Q;11. CAG	1. 0.71131;2. 51;3. 151;4. 56;5. 55;6. 163;7. 63;8. 187;9. 100;10. Y;11. TAT	1. 0.46453;2. 69;3. 205;4. 74;5. 73;6. 217;7. 81;8. 241;9. 154;10. V;11. GTT	1. 0.46484;2. 74;3. 220;4. 79;5. 78;6. 232;7. 86;8. 256;9. 169;10. S;11. AGC	1. 0.79182;2. 75;3. 223;4. 80;5. 79;6. 235;7. 87;8. 259;9. 172;10. A;11. GCA	1. 0.42639;2. 78;3. 232;4. 83;5. 82;6. 244;7. 90;8. 268;9. 181;10. N;11. AAT	1. 0.78993;2. 81;3. 241;4. 86;5. 85;6. 253;7. 93;8. 277;9. 190;10. K;11. AAA	1. 0.49244;2. 92;3. 274;4. 97;5. 96;6. 286;7. 104;8. 310;9. 223;10. R;11. CGA	1. 0.46514;2. 96;3. 286;4. 101;5. 100;6. 298;7. 108;8. 322;9. 235;10. A;11. GCG	1. 0.85928;2. 101;3. 301;4. 106;5. 105;6. 313;7. 113;8. 337;9. 250;10. N;11. AAT	1. 0.73713;2. 109;3. 325;4. 114;5. 113;6. 337;7. 121;8. 361;9. 274;10. A;11. GCG	1. 0.78648;2. 116;3. 346;4. 121;5. 120;6. 358;7. 128;8. 382;9. 295;10. R;11. CGC	1. 0.73799;2. 130;3. 388;4. 136;5. 134;6. 400;7. 142;8. 424;9. 337;10. S;11. AGC	1. 0.58201;2. 135;3. 403;4. 141;5. 139;6. 415;7. 147;8. 439;9. 352;10. E;11. GAG	1. 0.49761;2. 160;3. 478;4. 169;5. 164;6. 490;7. 172;8. 514;9. 427;10. A;11. GCT	1. 0.7922;2. 173;3. 517;4. 182;5. 177;6. 529;7. 185;8. 553;9. 466;10. H;11. CAT	1. 0.58568;2. 182;3. 544;4. 191;5. 186;6. 556;7. 194;8. 580;9. 493;10. A;11. GCA	1. 0.71502;2. 186;3. 556;4. 195;5. 190;6. 568;7. 198;8. 592;9. 505;10. V;11. GTC	1. 0.73972;2. 190;3. 568;4. 199;5. 194;6. 580;7. 202;8. 604;9. 517;10. V;11. GTA	1. 0.40032;2. 191;3. 571;4. 200;5. 195;6. 583;7. 203;8. 607;9. 520;10. P;11. CCA	1. 0.42982;2. 226;3. 676;4. 247;5. 240;6. 718;7. 255;8. 763;9. 538;10. V;11. GTC	1. 0.48211;2. 234;3. 700;4. 255;5. 248;6. 742;7. 263;8. 787;9. 562;10. I;11. ATC	1. 0.41649;2. 236;3. 706;4. 257;5. 250;6. 748;7. 265;8. 793;9. 568;10. G;11. GGA	1. 0.4707;2. 258;3. 772;4. 279;5. 272;6. 814;7. 287;8. 859;9. 634;10. D;11. GAC
ERS451417_01544	1717.62.peg.1553	NA	NA	NA	0.218	16	Cbelfantii_FRC0043,"Ccallunae_DSM20147","Cdeserti_GIMN1010","Cdiphtheriae_NCTC11397","Cefficiens_YS314","Cglutamicum_ATCC13032","Chalotolerans_YIM70093","Chumireducens_DSM45392","Cmarinum_DSM44953","Cpseudotuberculosis_31","Cpseudotuberculosis_ATCC19410","Csilvaticum_KL0182","Ctestudinoris_DSM44614","Culcerans_NCTC12077","Culcerans_NCTC7910","Cvitaeruminis_DSM20294"	999	0.297432	1.67677	0.461712	0.344305	1.70629	260	0
ERS451417_02249	1717.62.peg.2276	NA	NA	NA	0.2183	5	Cargentoratense_DSM44202,"Cdiphtheriae_NCTC11397","Ckroppenstedtii_DSM44385","Ckutscheri_DSM20755","Cvitaeruminis_DSM20294"	7.71223	0.276683	1.81714	0.396267	0.276093	1.79925	4096	27	1. 0.46463;2. 29;3. 85;4. 30;5. 30;6. 88;7. 31;8. 91;9. 79;10. R;11. CGC	1. 0.75674;2. 52;3. 154;4. 54;5. 54;6. 160;7. 54;8. 160;9. 148;10. R;11. CGC	1. 0.79434;2. 59;3. 175;4. 61;5. 61;6. 181;7. 61;8. 181;9. 169;10. K;11. AAG	1. 0.85644;2. 61;3. 181;4. 63;5. 63;6. 187;7. 63;8. 187;9. 175;10. S;11. TCC	1. 0.75263;2. 71;3. 211;4. 73;5. 73;6. 217;7. 73;8. 217;9. 205;10. V;11. GTG	1. 0.68344;2. 77;3. 229;4. 79;5. 79;6. 235;7. 79;8. 235;9. 223;10. T;11. ACC	1. 0.72764;2. 81;3. 241;4. 83;5. 83;6. 247;7. 85;8. 253;9. 235;10. R;11. CGC	1. 0.43267;2. 85;3. 253;4. 89;5. 89;6. 265;7. 89;8. 265;9. 247;10. S;11. TCA	1. 0.71341;2. 92;3. 274;4. 96;5. 96;6. 286;7. 96;8. 286;9. 268;10. R;11. CGC	1. 0.67037;2. 126;3. 376;4. 130;5. 130;6. 388;7. 130;8. 388;9. 370;10. A;11. GCC	1. 0.79272;2. 127;3. 379;4. 131;5. 131;6. 391;7. 131;8. 391;9. 373;10. S;11. TCC	1. 0.45212;2. 142;3. 424;4. 146;5. 146;6. 436;7. 146;8. 436;9. 418;10. I;11. ATC	1. 0.88111;2. 146;3. 436;4. 150;5. 150;6. 448;7. 150;8. 448;9. 430;10. S;11. TCT	1. 0.85779;2. 159;3. 475;4. 163;5. 163;6. 487;7. 163;8. 487;9. 469;10. V;11. GTC	1. 0.53325;2. 162;3. 484;4. 166;5. 166;6. 496;7. 166;8. 496;9. 478;10. P;11. CCC	1. 0.88821;2. 163;3. 487;4. 167;5. 167;6. 499;7. 167;8. 499;9. 481;10. A;11. GCG	1. 0.77155;2. 164;3. 490;4. 168;5. 168;6. 502;7. 168;8. 502;9. 484;10. R;11. CGT	1. 0.6852;2. 178;3. 532;4. 182;5. 182;6. 544;7. 182;8. 544;9. 526;10. M;11. ATG	1. 0.71678;2. 189;3. 565;4. 193;5. 193;6. 577;7. 193;8. 577;9. 559;10. N;11. AAC	1. 0.59225;2. 201;3. 601;4. 205;5. 205;6. 613;7. 205;8. 613;9. 595;10. S;11. TCC	1. 0.41934;2. 206;3. 616;4. 210;5. 210;6. 628;7. 210;8. 628;9. 610;10. T;11. ACT	1. 0.82763;2. 214;3. 640;4. 218;5. 218;6. 652;7. 218;8. 652;9. 634;10. Y;11. TAC	1. 0.75146;2. 217;3. 649;4. 221;5. 221;6. 661;7. 221;8. 661;9. 643;10. D;11. GAC	1. 0.86082;2. 246;3. 736;4. 250;5. 250;6. 748;7. 250;8. 748;9. 730;10. S;11. TCC	1. 0.97665;2. 248;3. 742;4. 252;5. 252;6. 754;7. 252;8. 754;9. 736;10. H;11. CAT	1. 0.45943;2. 253;3. 757;4. 257;5. 257;6. 769;7. 257;8. 769;9. 751;10. S;11. TCA	1. 0.54322;2. 258;3. 772;4. 263;5. 263;6. 787;7. 263;8. 787;9. 760;10. G;11. GGC
ERS451417_01130	1717.62.peg.1141	NA	NA	NA	0.2212	3	Cdiphtheriae_NCTC11397,"Cefficiens_YS314","Chalotolerans_YIM70093"	1.3812	0.137082	1.11063	0.203819	0.13754	1.05967	7296	5	1. 0.72084;2. 6;3. 16;4. 9;5. 9;6. 25;7. 9;8. 25;9. 16;10. V;11. GTC	1. 0.888;2. 25;3. 73;4. 28;5. 28;6. 82;7. 28;8. 82;9. 73;10. N;11. AAT	1. 0.83647;2. 57;3. 169;4. 60;5. 60;6. 178;7. 60;8. 178;9. 169;10. Q;11. CAG	1. 0.4753;2. 117;3. 349;4. 120;5. 120;6. 358;7. 120;8. 358;9. 349;10. S;11. AGT	1. 0.76478;2. 122;3. 364;4. 125;5. 125;6. 373;7. 125;8. 373;9. 364;10. E;11. GAG
ERS451417_02135	1717.62.peg.2155	NA	NA	NA	0.2222	7	Cbelfantii_FRC0043,"Cdiphtheriae_NCTC11397","Cpseudotuberculosis_31","Cpseudotuberculosis_ATCC19410","Csilvaticum_KL0182","Culcerans_NCTC12077","Culcerans_NCTC7910"	51.8881	0.0843004	2.77365	0.280729	0.084875	2.77342	256	0
ERS451417_00512	1717.62.peg.516	NA	NA	NA	0.2235	8	Cbelfantii_FRC0043,"Cdiphtheriae_NCTC11397","Cpseudotuberculosis_31","Cpseudotuberculosis_ATCC19410","Crouxii_FRC0190","Csilvaticum_KL0182","Culcerans_NCTC12077","Culcerans_NCTC7910"	999	0.0732056	3.76324	1	0.0736387	3.76378	2052	5	1. 0.4107;2. 12;3. 34;4. 17;5. 12;6. 34;7. 12;8. 34;9. 34;10. H;11. CAC	1. 0.43599;2. 57;3. 169;4. 62;5. 57;6. 169;7. 57;8. 169;9. 169;10. E;11. GAG	1. 0.58228;2. 192;3. 574;4. 285;5. 192;6. 574;7. 197;8. 589;9. 508;10. D;11. GAC	1. 0.67671;2. 214;3. 640;4. 334;5. 214;6. 640;7. 219;8. 655;9. 574;10. N;11. AAT	1. 0.49634;2. 255;3. 763;4. 386;5. 255;6. 763;7. 273;8. 817;9. 628;10. S;11. TCA
ERS451417_02355	1717.62.peg.2383	NA	NA	NA	0.2298	9	Cbelfantii_FRC0043,"Cdeserti_GIMN1010","Cdiphtheriae_NCTC11397","Cefficiens_YS314","Cfalsenii_DSM44353","Chalotolerans_YIM70093","Chumireducens_DSM45392","Ctestudinoris_DSM44614","Curealyticum_DSM7109"	31.3386	0.175314	2.68742	0.582942	0.176931	2.70417	3072	3	1. 0.4333;2. 81;3. 241;4. 171;5. 94;6. 280;7. 108;8. 322;9. 169;10. M;11. ATG	1. 0.46947;2. 115;3. 343;4. 223;5. 140;6. 418;7. 154;8. 460;9. 226;10. A;11. GCG	1. 0.42421;2. 157;3. 469;4. 275;5. 185;6. 553;7. 196;8. 586;9. 352;10. L;11. CTG
ERS451417_01500	1717.62.peg.1508	NA	NA	NA	0.235	12	Cdiphtheriae_NCTC11397,"Cefficiens_YS314","Cglutamicum_ATCC13032","Chalotolerans_YIM70093","Chumireducens_DSM45392","Cpseudotuberculosis_31","Cpseudotuberculosis_ATCC19410","Csilvaticum_KL0182","Ctestudinoris_DSM44614","Culcerans_NCTC12077","Culcerans_NCTC7910","Cvitaeruminis_DSM20294"	8.88063	0.22307	1.81495	0.37834	0.21024	1.80939	4096	36	1. 0.60886;2. 23;3. 67;4. 50;5. 35;6. 103;7. 56;8. 166;9. 10;10. E;11. GAA	1. 0.95448;2. 36;3. 106;4. 63;5. 48;6. 142;7. 69;8. 205;9. 49;10. L;11. TTG	1. 0.43281;2. 39;3. 115;4. 66;5. 51;6. 151;7. 72;8. 214;9. 58;10. G;11. GGT	1. 0.94982;2. 43;3. 127;4. 70;5. 55;6. 163;7. 76;8. 226;9. 70;10. A;11. GCA	1. 0.99856;2. 45;3. 133;4. 72;5. 57;6. 169;7. 78;8. 232;9. 76;10. C;11. TGT	1. 0.87085;2. 46;3. 136;4. 73;5. 58;6. 172;7. 79;8. 235;9. 79;10. H;11. CAC	1. 0.62946;2. 64;3. 190;4. 91;5. 76;6. 226;7. 97;8. 289;9. 133;10. L;11. TTA	1. 0.49536;2. 69;3. 205;4. 96;5. 81;6. 241;7. 102;8. 304;9. 148;10. A;11. GCG	1. 0.62246;2. 74;3. 220;4. 101;5. 86;6. 256;7. 107;8. 319;9. 163;10. T;11. ACC	1. 0.77045;2. 78;3. 232;4. 106;5. 91;6. 271;7. 112;8. 334;9. 172;10. P;11. CCG	1. 0.70029;2. 84;3. 250;4. 112;5. 97;6. 289;7. 118;8. 352;9. 190;10. T;11. ACA	1. 0.43294;2. 88;3. 262;4. 116;5. 101;6. 301;7. 122;8. 364;9. 202;10. A;11. GCG	1. 0.88425;2. 91;3. 271;4. 119;5. 104;6. 310;7. 125;8. 373;9. 211;10. S;11. TCG	1. 0.50345;2. 105;3. 313;4. 135;5. 120;6. 358;7. 139;8. 415;9. 253;10. Q;11. CAA	1. 0.4654;2. 110;3. 328;4. 140;5. 125;6. 373;7. 144;8. 430;9. 268;10. L;11. TTG	1. 0.43742;2. 117;3. 349;4. 147;5. 132;6. 394;7. 151;8. 451;9. 289;10. Q;11. CAA	1. 0.42025;2. 133;3. 397;4. 163;5. 148;6. 442;7. 167;8. 499;9. 337;10. S;11. TCG	1. 0.4935;2. 134;3. 400;4. 164;5. 149;6. 445;7. 168;8. 502;9. 340;10. S;11. TCT	1. 0.44229;2. 136;3. 406;4. 166;5. 151;6. 451;7. 170;8. 508;9. 346;10. V;11. GTC	1. 0.46453;2. 137;3. 409;4. 167;5. 152;6. 454;7. 171;8. 511;9. 349;10. Y;11. TAT	1. 0.92402;2. 175;3. 523;4. 206;5. 190;6. 568;7. 209;8. 625;9. 463;10. D;11. GAT	1. 0.91874;2. 185;3. 553;4. 216;5. 200;6. 598;7. 219;8. 655;9. 493;10. A;11. GCC	1. 0.46686;2. 191;3. 571;4. 222;5. 206;6. 616;7. 225;8. 673;9. 511;10. N;11. AAC	1. 0.81169;2. 193;3. 577;4. 224;5. 208;6. 622;7. 227;8. 679;9. 517;10. N;11. AAT	1. 0.41206;2. 203;3. 607;4. 234;5. 218;6. 652;7. 237;8. 709;9. 547;10. M;11. ATG	1. 0.41428;2. 211;3. 631;4. 242;5. 226;6. 676;7. 245;8. 733;9. 571;10. A;11. GCT	1. 0.6631;2. 212;3. 634;4. 243;5. 227;6. 679;7. 246;8. 736;9. 574;10. A;11. GCG	1. 0.97272;2. 233;3. 697;4. 264;5. 248;6. 742;7. 267;8. 799;9. 586;10. C;11. TGT	1. 0.56757;2. 237;3. 709;4. 268;5. 252;6. 754;7. 271;8. 811;9. 598;10. W;11. TGG	1. 0.81259;2. 253;3. 757;4. 284;5. 268;6. 802;7. 287;8. 859;9. 646;10. Y;11. TAC	1. 0.52812;2. 260;3. 778;4. 291;5. 275;6. 823;7. 294;8. 880;9. 667;10. V;11. GTC	1. 0.40321;2. 283;3. 847;4. 315;5. 298;6. 892;7. 317;8. 949;9. 736;10. W;11. TGG	1. 0.6933;2. 286;3. 856;4. 318;5. 301;6. 901;7. 320;8. 958;9. 745;10. V;11. GTT	1. 0.96561;2. 292;3. 874;4. 324;5. 307;6. 919;7. 326;8. 976;9. 763;10. C;11. TGT
ERS451417_01777	1717.62.peg.1779	NA	NA	NA	0.2377	5	Cbelfantii_FRC0043,"Ccamporealensis_DSM44610","Cdiphtheriae_NCTC11397","Chumireducens_DSM45392","CriegeliiPUDD83A45"	238.884	0.0832914	1.79797	0.168419	0.083053	1.83037	260	0
ERS451417_01265	1717.62.peg.1273	NA	NA	NA	0.2451	3	Cbelfantii_FRC0043,"Cdiphtheriae_NCTC11397","Crouxii_FRC0190"	999	0.48215	4.55039	1	0.48413	4.56481	388	0
ERS451417_02177	1717.62.peg.2203	NA	NA	NA	0.2545	6	Cdiphtheriae_NCTC11397,"Cpseudotuberculosis_31","Cpseudotuberculosis_ATCC19410","Csilvaticum_KL0182","Culcerans_NCTC12077","Culcerans_NCTC7910"	5.50501	0.2157	4.00882	0.427795	0.222144	3.9524	4096	1	1. 0.91346;2. 163;3. 487;4. 180;5. 177;6. 529;7. 177;8. 529;9. 436;10. C;11. TGC
ERS451417_02293	1717.62.peg.2322	NA	NA	NA	0.2561	30	Cargentoratense_DSM44202,"Catypicum_R2070","Caurimucosum_ATCC700975","Cbelfantii_FRC0043","Ccallunae_DSM20147","Ccamporealensis_DSM44610","Cdeserti_GIMN1010","Cdiphtheriae_NCTC11397","Cefficiens_YS314","Cepidermidicanis_DSM45586","Cfalsenii_DSM44353","Cglutamicum_ATCC13032","Chumireducens_DSM45392","Cimitans_DSM44264","Ckroppenstedtii_DSM44385","Ckutscheri_DSM20755","Clactis_RW25","Cmarinum_DSM44…	488.304	0.168343	1.72631	0.17009	0.17009	1.72518	260	0
ERS451417_00969	1717.62.peg.977	NA	NA	NA	0.2719	13	Caurimucosum_ATCC700975,"Cbelfantii_FRC0043","Cdiphtheriae_NCTC11397","Cepidermidicanis_DSM45586","Ckutscheri_DSM20755","Clactis_RW25","Cpseudotuberculosis_31","Cpseudotuberculosis_ATCC19410","Crouxii_FRC0190","Csilvaticum_KL0182","Ctestudinoris_DSM44614","Culcerans_NCTC12077","Culcerans_NCTC7910"	0.29084	0.200109	2.58249	0.263234	0.199822	2.58806	2050	3	1. 0.57058;2. 81;3. 241;4. 148;5. 113;6. 337;7. 146;8. 436;9. 127;10. V;11. GTC	1. 0.50775;2. 107;3. 319;4. 183;5. 139;6. 415;7. 172;8. 514;9. 205;10. I;11. ATT	1. 0.97835;2. 108;3. 322;4. 184;5. 140;6. 418;7. 173;8. 517;9. 208;10. V;11. GTC
ERS451417_00991	1717.62.peg.1002	NA	NA	NA	0.2738	28	Cargentoratense_DSM44202,"Cbelfantii_FRC0043","Cdeserti_GIMN1010","Cdiphtheriae_NCTC11397","Cefficiens_YS314","Cepidermidicanis_DSM45586","Cfalsenii_DSM44353","Cglutamicum_ATCC13032","Cglycinophilum_AJ3170","Chalotolerans_YIM70093","Chumireducens_DSM45392","Cjeikeium_K41","Ckroppenstedtii_DSM44385","Ckutscheri_DSM20755","Cmarinum_DSM44953","Cmaris_DSM45190","Cmustelae_DSM45274","Cpseudotuberculos…	0.210981	0.188298	1.70341	0.999925	0.188001	1.70702	3074	1	1. 0.78566;2. 420;3. 1258;4. 449;5. 445;6. 1333;7. 496;8. 1486;9. 1027;10. C;11. TGT
ERS451417_01672	1717.62.peg.1679	NA	NA	NA	0.2857	5	Caurimucosum_ATCC700975,"Cdiphtheriae_NCTC11397","Csimulans_PES1","Csingulare_IBSB52218","Cvitaeruminis_DSM20294"	8.7351	0.184663	1.96594	0.384356	0.182594	1.93163	4096	39	1. 0.93908;2. 28;3. 82;4. 51;5. 28;6. 82;7. 28;8. 82;9. 22;10. L;11. CTC	1. 0.484;2. 32;3. 94;4. 55;5. 32;6. 94;7. 32;8. 94;9. 34;10. Q;11. CAA	1. 0.46407;2. 40;3. 118;4. 63;5. 40;6. 118;7. 40;8. 118;9. 58;10. S;11. AGC	1. 0.4863;2. 42;3. 124;4. 65;5. 42;6. 124;7. 42;8. 124;9. 64;10. N;11. AAT	1. 0.97239;2. 46;3. 136;4. 69;5. 46;6. 136;7. 46;8. 136;9. 76;10. S;11. AGT	1. 0.80902;2. 52;3. 154;4. 75;5. 52;6. 154;7. 52;8. 154;9. 94;10. K;11. AAA	1. 0.53071;2. 55;3. 163;4. 78;5. 55;6. 163;7. 55;8. 163;9. 103;10. S;11. AGT	1. 0.74436;2. 70;3. 208;4. 93;5. 70;6. 208;7. 70;8. 208;9. 148;10. T;11. ACC	1. 0.86428;2. 75;3. 223;4. 98;5. 75;6. 223;7. 75;8. 223;9. 163;10. R;11. CGT	1. 0.52676;2. 90;3. 268;4. 133;5. 90;6. 268;7. 90;8. 268;9. 208;10. E;11. GAA	1. 0.85586;2. 100;3. 298;4. 143;5. 100;6. 298;7. 100;8. 298;9. 238;10. Y;11. TAC	1. 0.48325;2. 108;3. 322;4. 151;5. 108;6. 322;7. 108;8. 322;9. 262;10. Q;11. CAA	1. 0.73006;2. 109;3. 325;4. 152;5. 109;6. 325;7. 109;8. 325;9. 265;10. K;11. AAA	1. 0.95897;2. 111;3. 331;4. 154;5. 111;6. 331;7. 111;8. 331;9. 271;10. A;11. GCG	1. 0.42003;2. 112;3. 334;4. 155;5. 112;6. 334;7. 112;8. 334;9. 274;10. Q;11. CAA	1. 0.52534;2. 123;3. 367;4. 167;5. 123;6. 367;7. 123;8. 367;9. 307;10. A;11. GCA	1. 0.51388;2. 134;3. 400;4. 178;5. 134;6. 400;7. 134;8. 400;9. 340;10. E;11. GAG	1. 0.49236;2. 137;3. 409;4. 181;5. 137;6. 409;7. 137;8. 409;9. 349;10. S;11. AGC	1. 0.91319;2. 140;3. 418;4. 184;5. 140;6. 418;7. 140;8. 418;9. 358;10. R;11. CGA	1. 0.91221;2. 154;3. 460;4. 198;5. 154;6. 460;7. 154;8. 460;9. 400;10. H;11. CAC	1. 0.76659;2. 157;3. 469;4. 201;5. 157;6. 469;7. 157;8. 469;9. 409;10. K;11. AAA	1. 0.80307;2. 158;3. 472;4. 202;5. 158;6. 472;7. 158;8. 472;9. 412;10. A;11. GCT	1. 0.41702;2. 159;3. 475;4. 203;5. 159;6. 475;7. 159;8. 475;9. 415;10. A;11. GCT	1. 0.8198;2. 168;3. 502;4. 212;5. 168;6. 502;7. 168;8. 502;9. 442;10. Y;11. TAC	1. 0.91538;2. 174;3. 520;4. 218;5. 174;6. 520;7. 174;8. 520;9. 460;10. K;11. AAA	1. 0.96666;2. 176;3. 526;4. 220;5. 176;6. 526;7. 176;8. 526;9. 466;10. A;11. GCA	1. 0.52671;2. 180;3. 538;4. 224;5. 180;6. 538;7. 180;8. 538;9. 478;10. S;11. TCA	1. 0.95293;2. 181;3. 541;4. 225;5. 181;6. 541;7. 181;8. 541;9. 481;10. R;11. CGT	1. 0.75267;2. 182;3. 544;4. 227;5. 182;6. 544;7. 182;8. 544;9. 484;10. I;11. ATC	1. 0.81605;2. 184;3. 550;4. 229;5. 184;6. 550;7. 184;8. 550;9. 490;10. T;11. ACC	1. 0.45394;2. 191;3. 571;4. 236;5. 191;6. 571;7. 191;8. 571;9. 511;10. Q;11. CAA	1. 0.90167;2. 195;3. 583;4. 240;5. 195;6. 583;7. 195;8. 583;9. 523;10. Q;11. CAA	1. 0.91285;2. 202;3. 604;4. 247;5. 202;6. 604;7. 202;8. 604;9. 544;10. L;11. TTG	1. 0.46103;2. 210;3. 628;4. 256;5. 210;6. 628;7. 210;8. 628;9. 568;10. D;11. GAC
ERS451417_01035	1717.62.peg.1046	NA	NA	NA	0.2922	3	Cbelfantii_FRC0043,"Cdiphtheriae_NCTC11397","Crouxii_FRC0190"	999	1	2.72569	1.00001	1.00001	2.51938	420	0
ERS451417_02037	1717.62.peg.2049	NA	NA	NA	0.2941	4	Cdiphtheriae_NCTC11397,"Cmarinum_DSM44953","CriegeliiPUDD83A45","Csingulare_IBSB52218"	0.689172	0.271841	1.23091	0.426662	0.274047	1.24573	4098	34	1. 0.48082;2. 16;3. 46;4. 97;5. 96;6. 286;7. 96;8. 286;9. 4;10. K;11. AAG	1. 0.45335;2. 17;3. 49;4. 98;5. 97;6. 289;7. 97;8. 289;9. 7;10. F;11. TTC	1. 0.96741;2. 44;3. 130;4. 125;5. 124;6. 370;7. 124;8. 370;9. 88;10. P;11. CCC	1. 0.84632;2. 48;3. 142;4. 129;5. 128;6. 382;7. 128;8. 382;9. 100;10. L;11. CTG	1. 0.76481;2. 52;3. 154;4. 133;5. 132;6. 394;7. 132;8. 394;9. 112;10. G;11. GGG	1. 0.52121;2. 54;3. 160;4. 135;5. 134;6. 400;7. 134;8. 400;9. 118;10. S;11. TCA	1. 0.85095;2. 55;3. 163;4. 136;5. 135;6. 403;7. 135;8. 403;9. 121;10. K;11. AAA	1. 0.5972;2. 65;3. 193;4. 146;5. 145;6. 433;7. 145;8. 433;9. 151;10. L;11. CTC	1. 0.57796;2. 73;3. 217;4. 154;5. 153;6. 457;7. 153;8. 457;9. 175;10. I;11. ATC	1. 0.47551;2. 74;3. 220;4. 155;5. 154;6. 460;7. 154;8. 460;9. 178;10. E;11. GAA	1. 0.99106;2. 81;3. 241;4. 162;5. 161;6. 481;7. 161;8. 481;9. 199;10. A;11. GCA	1. 0.59959;2. 82;3. 244;4. 163;5. 162;6. 484;7. 162;8. 484;9. 202;10. V;11. GTC	1. 0.66867;2. 90;3. 268;4. 171;5. 170;6. 508;7. 170;8. 508;9. 226;10. T;11. ACT	1. 0.69933;2. 108;3. 322;4. 189;5. 188;6. 562;7. 188;8. 562;9. 280;10. S;11. TCA	1. 0.50162;2. 113;3. 337;4. 194;5. 193;6. 577;7. 193;8. 577;9. 295;10. Y;11. TAT	1. 0.66716;2. 114;3. 340;4. 195;5. 194;6. 580;7. 194;8. 580;9. 298;10. L;11. CTA	1. 0.57142;2. 122;3. 364;4. 203;5. 202;6. 604;7. 202;8. 604;9. 322;10. F;11. TTC	1. 0.63396;2. 132;3. 394;4. 213;5. 212;6. 634;7. 212;8. 634;9. 352;10. Q;11. CAA	1. 0.55157;2. 144;3. 430;4. 225;5. 224;6. 670;7. 224;8. 670;9. 388;10. K;11. AAG	1. 0.65142;2. 146;3. 436;4. 227;5. 226;6. 676;7. 226;8. 676;9. 394;10. S;11. AGC	1. 0.45961;2. 151;3. 451;4. 232;5. 231;6. 691;7. 231;8. 691;9. 409;10. P;11. CCT	1. 0.75255;2. 163;3. 487;4. 244;5. 243;6. 727;7. 243;8. 727;9. 445;10. K;11. AAA	1. 0.83515;2. 166;3. 496;4. 247;5. 246;6. 736;7. 246;8. 736;9. 454;10. D;11. GAT	1. 0.50736;2. 169;3. 505;4. 250;5. 249;6. 745;7. 249;8. 745;9. 463;10. R;11. CGG	1. 0.63861;2. 172;3. 514;4. 253;5. 252;6. 754;7. 252;8. 754;9. 472;10. T;11. ACG	1. 0.74058;2. 174;3. 520;4. 255;5. 254;6. 760;7. 254;8. 760;9. 478;10. S;11. AGT	1. 0.99404;2. 177;3. 529;4. 258;5. 257;6. 769;7. 257;8. 769;9. 487;10. F;11. TTC	1. 0.97584;2. 187;3. 559;4. 268;5. 267;6. 799;7. 267;8. 799;9. 517;10. S;11. AGC	1. 0.98454;2. 192;3. 574;4. 273;5. 272;6. 814;7. 272;8. 814;9. 532;10. H;11. CAT	1. 0.95059;2. 199;3. 595;4. 280;5. 279;6. 835;7. 279;8. 835;9. 553;10. T;11. ACG	1. 0.50727;2. 216;3. 646;4. 309;5. 296;6. 886;7. 296;8. 886;9. 604;10. S;11. TCC	1. 0.49221;2. 239;3. 715;4. 332;5. 319;6. 955;7. 319;8. 955;9. 673;10. T;11. ACC	1. 0.55704;2. 246;3. 736;4. 339;5. 326;6. 976;7. 326;8. 976;9. 694;10. T;11. ACC	1. 0.51956;2. 255;3. 763;4. 348;5. 335;6. 1003;7. 335;8. 1003;9. 721;10. R;11. CGC
ERS451417_00728	1717.62.peg.731	NA	NA	NA	0.3148	14	Cbelfantii_FRC0043,"Ccallunae_DSM20147","Cdeserti_GIMN1010","Cdiphtheriae_NCTC11397","Cefficiens_YS314","Cglutamicum_ATCC13032","Ckutscheri_DSM20755","Cpseudotuberculosis_31","Cpseudotuberculosis_ATCC19410","Crouxii_FRC0190","Csilvaticum_KL0182","Culcerans_NCTC12077","Culcerans_NCTC7910","Cvitaeruminis_DSM20294"	999	0.083405	1.84407	1	0.0833956	1.83737	4	2	1. 0.94819;2. 17;3. 49;4. 32;5. 22;6. 64;7. 21;8. 61;9. 37;10. A;11. GCT	1. 0.94563;2. 32;3. 94;4. 47;5. 37;6. 109;7. 36;8. 106;9. 82;10. E;11. GAG
ERS451417_01797	1717.62.peg.1802	NA	NA	NA	0.3193	38	Cargentoratense_DSM44202,"Catypicum_R2070","Caurimucosum_ATCC700975","Cbelfantii_FRC0043","Ccallunae_DSM20147","Ccamporealensis_DSM44610","Cdeserti_GIMN1010","Cdiphtheriae_NCTC11397","Cdoosanense_DSM45436","Cefficiens_YS314","Cepidermidicanis_DSM45586","Cfalsenii_DSM44353","Cglutamicum_ATCC13032","Cglycinophilum_AJ3170","Chalotolerans_YIM70093","Chumireducens_DSM45392","Cimitans_DSM44264","Cjeike…	0.247827	0.247827	1.68349	0.247866	0.247866	1.68254	258	0
ERS451417_01600	1717.62.peg.1609	NA	NA	NA	0.324	35	Cargentoratense_DSM44202,"Catypicum_R2070","Caurimucosum_ATCC700975","Cbelfantii_FRC0043","Ccallunae_DSM20147","Ccamporealensis_DSM44610","Cdeserti_GIMN1010","Cdiphtheriae_NCTC11397","Cdoosanense_DSM45436","Cefficiens_YS314","Cepidermidicanis_DSM45586","Cglutamicum_ATCC13032","Cglycinophilum_AJ3170","Chalotolerans_YIM70093","Chumireducens_DSM45392","Cimitans_DSM44264","Cjeikeium_K41","Ckutscheri_…	0.247465	0.247465	1.74056	0.346534	0.246512	1.74787	3330	0
ERS451417_00970	1717.62.peg.978	NA	NA	NA	0.3299	11	Cbelfantii_FRC0043,"Cdiphtheriae_NCTC11397","Cepidermidicanis_DSM45586","Ckutscheri_DSM20755","Cpseudotuberculosis_31","Cpseudotuberculosis_ATCC19410","Crouxii_FRC0190","Csilvaticum_KL0182","Ctestudinoris_DSM44614","Culcerans_NCTC12077","Culcerans_NCTC7910"	0.17978	0.154572	3.06168	0.156849	0.156849	3.06407	2	5	1. 0.43269;2. 32;3. 94;4. 73;5. 55;6. 163;7. 59;8. 175;9. 13;10. V;11. GTC	1. 0.59096;2. 39;3. 115;4. 80;5. 62;6. 184;7. 66;8. 196;9. 34;10. S;11. TCA	1. 0.50666;2. 42;3. 124;4. 83;5. 65;6. 193;7. 69;8. 205;9. 43;10. I;11. ATA	1. 0.58759;2. 200;3. 598;4. 247;5. 225;6. 673;7. 229;8. 685;9. 490;10. V;11. GTA	1. 0.45871;2. 214;3. 640;4. 261;5. 239;6. 715;7. 243;8. 727;9. 532;10. T;11. ACA
ERS451417_00715	1717.62.peg.720	NA	NA	NA	0.3324	16	Cargentoratense_DSM44202,"Cbelfantii_FRC0043","Cdeserti_GIMN1010","Cdiphtheriae_NCTC11397","Cefficiens_YS314","Cepidermidicanis_DSM45586","Cglutamicum_ATCC13032","Ckroppenstedtii_DSM44385","Clactis_RW25","Cmustelae_DSM45274","Cpseudotuberculosis_31","Cpseudotuberculosis_ATCC19410","Crouxii_FRC0190","Culcerans_NCTC12077","Culcerans_NCTC7910","Cvitaeruminis_DSM20294"	0.201046	0.162279	2.11519	0.163124	0.163115	2.1137	2050	3	1. 0.55753;2. 38;3. 112;4. 57;5. 57;6. 169;7. 74;8. 220;9. 76;10. F;11. TTC	1. 0.58683;2. 299;3. 895;4. 319;5. 319;6. 955;7. 415;8. 1243;9. 715;10. A;11. GCT	1. 0.59329;2. 368;3. 1102;4. 388;5. 388;6. 1162;7. 484;8. 1450;9. 886;10. S;11. AGT
ERS451417_00911	1717.62.peg.918	NA	NA	NA	0.3371	9	Cbelfantii_FRC0043,"Cdiphtheriae_NCTC11397","Ckutscheri_DSM20755","Cpseudotuberculosis_ATCC19410","Crouxii_FRC0190","Csilvaticum_KL0182","Culcerans_NCTC12077","Culcerans_NCTC7910","Cvitaeruminis_DSM20294"	999	0.267207	2.21025	1	0.267116	2.20879	2052	2	1. 0.40619;2. 136;3. 406;4. 166;5. 150;6. 448;7. 159;8. 475;9. 301;10. V;11. GTT	1. 0.45789;2. 137;3. 409;4. 167;5. 151;6. 451;7. 160;8. 478;9. 304;10. A;11. GCC
ERS451417_01177	1717.62.peg.1186	NA	NA	NA	0.3401	39	Cargentoratense_DSM44202,"Catypicum_R2070","Caurimucosum_ATCC700975","Cbelfantii_FRC0043","Ccallunae_DSM20147","Ccamporealensis_DSM44610","Cdeserti_GIMN1010","Cdiphtheriae_NCTC11397","Cdoosanense_DSM45436","Cefficiens_YS314","Cepidermidicanis_DSM45586","Cfalsenii_DSM44353","Cglutamicum_ATCC13032","Cglycinophilum_AJ3170","Chalotolerans_YIM70093","Chumireducens_DSM45392","Cimitans_DSM44264","Cjeike…	0.851802	0.229101	1.87006	0.439156	0.229656	1.87008	3072	4	1. 0.88078;2. 100;3. 298;4. 107;5. 107;6. 319;7. 130;8. 388;9. 103;10. S;11. TCA	1. 0.41771;2. 104;3. 310;4. 111;5. 111;6. 331;7. 134;8. 400;9. 115;10. L;11. CTG	1. 0.87438;2. 126;3. 376;4. 133;5. 133;6. 397;7. 156;8. 466;9. 181;10. R;11. CGA	1. 0.85579;2. 143;3. 427;4. 150;5. 150;6. 448;7. 173;8. 517;9. 232;10. S;11. AGC
ERS451417_02104	1717.62.peg.2118	NA	NA	NA	0.356	3	Cdiphtheriae_NCTC11397,"Csimulans_PES1","Csingulare_IBSB52218"	999	1		1	1		4484	0
ERS451417_00470	1717.62.peg.474	NA	NA	NA	0.3692	8	Cbelfantii_FRC0043,"Cdiphtheriae_NCTC11397","Cpseudotuberculosis_31","Cpseudotuberculosis_ATCC19410","Crouxii_FRC0190","Csilvaticum_KL0182","Culcerans_NCTC12077","Culcerans_NCTC7910"	0.223828	0.155209	3.00125	0.164368	0.163866	2.99208	2	4	1. 0.44;2. 15;3. 43;4. 21;5. 17;6. 49;7. 17;8. 49;9. 43;10. A;11. GCC	1. 0.43235;2. 115;3. 343;4. 123;5. 119;6. 355;7. 121;8. 361;9. 319;10. I;11. ATA	1. 0.58853;2. 116;3. 346;4. 124;5. 120;6. 358;7. 122;8. 364;9. 322;10. S;11. TCG	1. 0.62145;2. 209;3. 625;4. 222;5. 215;6. 643;7. 217;8. 649;9. 601;10. S;11. TCC
ERS451417_02395	1717.62.peg.2427	NA	NA	NA	0.3894	5	Cbelfantii_FRC0043,"Cdiphtheriae_NCTC11397","Cpseudotuberculosis_ATCC19410","Csilvaticum_KL0182","Culcerans_NCTC12077"	0.137679	0.092611	2.98606	0.0968254	0.0968254	2.99482	2	1	1. 0.84965;2. 32;3. 94;4. 138;5. 78;6. 232;7. 110;8. 328;9. 37;10. G;11. GGC
ERS451417_01176	1717.62.peg.1185	NA	NA	NA	0.3929	8	Cbelfantii_FRC0043,"Cdiphtheriae_NCTC11397","Cpseudotuberculosis_31","Cpseudotuberculosis_ATCC19410","Crouxii_FRC0190","Csilvaticum_KL0182","Culcerans_NCTC12077","Culcerans_NCTC7910"	999	0.657156	3.55477	0.682751	0.682751	3.58099	2052	1	1. 0.42223;2. 17;3. 49;4. 31;5. 24;6. 70;7. 22;8. 64;9. 19;10. S;11. TCA
1717.62.peg.2102	1717.62.peg.2102	NA	NA	NA	0.407	7	Cdiphtheriae_NCTC11397,"Cdoosanense_DSM45436","Cepidermidicanis_DSM45586","Cjeikeium_K41","Clactis_RW25","Csingulare_IBSB52218","Curealyticum_DSM7109"	0.48857	0.249132	2.30491	0.333804	0.251017	2.2691	7170	3	1. 0.78562;2. 2;3. 4;4. 8;5. 2;6. 4;7. 2;8. 4;9. 4;10. G;11. GGT	1. 0.79785;2. 42;3. 124;4. 49;5. 43;6. 127;7. 45;8. 133;9. 103;10. S;11. AGC	1. 0.86873;2. 97;3. 289;4. 114;5. 99;6. 295;7. 117;8. 349;9. 208;10. R;11. CGG
1717.62.peg.2101	1717.62.peg.2101	NA	NA	NA	0.4091	5	Cdiphtheriae_NCTC11397,"Cdoosanense_DSM45436","Cepidermidicanis_DSM45586","Cjeikeium_K41","Csingulare_IBSB52218"	0.574542	0.299293	1.8854	0.435183	0.301035	1.85897	7170	19	1. 0.40422;2. 4;3. 10;4. 12;5. 4;6. 10;7. 4;8. 10;9. 10;10. F;11. TTC	1. 0.86625;2. 26;3. 76;4. 35;5. 26;6. 76;7. 26;8. 76;9. 73;10. C;11. TGC	1. 0.49571;2. 28;3. 82;4. 37;5. 28;6. 82;7. 28;8. 82;9. 79;10. D;11. GAT	1. 0.96265;2. 30;3. 88;4. 39;5. 30;6. 88;7. 30;8. 88;9. 85;10. Y;11. TAC	1. 0.96564;2. 38;3. 112;4. 47;5. 38;6. 112;7. 38;8. 112;9. 109;10. F;11. TTT	1. 0.55385;2. 52;3. 154;4. 61;5. 52;6. 154;7. 52;8. 154;9. 151;10. E;11. GAA	1. 0.40977;2. 59;3. 175;4. 68;5. 59;6. 175;7. 59;8. 175;9. 172;10. R;11. CGC	1. 0.45076;2. 60;3. 178;4. 69;5. 60;6. 178;7. 60;8. 178;9. 175;10. L;11. CTA	1. 0.98746;2. 74;3. 220;4. 83;5. 74;6. 220;7. 74;8. 220;9. 217;10. H;11. CAC	1. 0.93796;2. 79;3. 235;4. 88;5. 79;6. 235;7. 79;8. 235;9. 232;10. D;11. GAC	1. 0.46916;2. 90;3. 268;4. 103;5. 90;6. 268;7. 90;8. 268;9. 265;10. G;11. GGC	1. 0.48554;2. 106;3. 316;4. 119;5. 106;6. 316;7. 106;8. 316;9. 313;10. N;11. AAC	1. 0.43821;2. 108;3. 322;4. 121;5. 108;6. 322;7. 108;8. 322;9. 319;10. V;11. GTG	1. 0.61082;2. 146;3. 436;4. 159;5. 146;6. 436;7. 146;8. 436;9. 433;10. R;11. CGT	1. 0.9739;2. 147;3. 439;4. 160;5. 147;6. 439;7. 147;8. 439;9. 436;10. S;11. AGT	1. 0.44732;2. 167;3. 499;4. 181;5. 167;6. 499;7. 167;8. 499;9. 496;10. S;11. TCG	1. 0.51219;2. 169;3. 505;4. 183;5. 169;6. 505;7. 169;8. 505;9. 502;10. K;11. AAG	1. 0.46565;2. 173;3. 517;4. 187;5. 173;6. 517;7. 173;8. 517;9. 514;10. S;11. TCA	1. 0.96544;2. 183;3. 547;4. 197;5. 183;6. 547;7. 183;8. 547;9. 544;10. S;11. TCG
ERS451417_01999	1717.62.peg.2003	NA	NA	NA	0.4244	7	Cbelfantii_FRC0043,"Cdiphtheriae_NCTC11397","Cpseudotuberculosis_31","Cpseudotuberculosis_ATCC19410","Csilvaticum_KL0182","Culcerans_NCTC12077","Culcerans_NCTC7910"	0.628102	0.31306	4.36481	0.528866	0.313233	4.36112	2	10	1. 0.7757;2. 108;3. 322;4. 108;5. 108;6. 322;7. 108;8. 322;9. 322;10. A;11. GCT	1. 0.74892;2. 163;3. 487;4. 163;5. 163;6. 487;7. 163;8. 487;9. 487;10. I;11. ATA	1. 0.4996;2. 174;3. 520;4. 174;5. 174;6. 520;7. 174;8. 520;9. 520;10. L;11. CTG	1. 0.76542;2. 182;3. 544;4. 182;5. 182;6. 544;7. 182;8. 544;9. 544;10. T;11. ACC	1. 0.77958;2. 352;3. 1054;4. 352;5. 352;6. 1054;7. 352;8. 1054;9. 1054;10. V;11. GTC	1. 0.40207;2. 390;3. 1168;4. 390;5. 390;6. 1168;7. 390;8. 1168;9. 1168;10. S;11. TCC	1. 0.70238;2. 423;3. 1267;4. 423;5. 423;6. 1267;7. 423;8. 1267;9. 1267;10. W;11. TGG	1. 0.42174;2. 448;3. 1342;4. 448;5. 448;6. 1342;7. 448;8. 1342;9. 1342;10. V;11. GTT	1. 0.43627;2. 722;3. 2164;4. 722;5. 722;6. 2164;7. 722;8. 2164;9. 2164;10. V;11. GTC	1. 0.74702;2. 859;3. 2575;4. 859;5. 859;6. 2575;7. 859;8. 2575;9. 2575;10. M;11. ATG
ERS451417_02388	1717.62.peg.2420	NA	NA	NA	0.4292	28	Catypicum_R2070,"Cbelfantii_FRC0043","Ccallunae_DSM20147","Ccamporealensis_DSM44610","Cdeserti_GIMN1010","Cdiphtheriae_NCTC11397","Cdoosanense_DSM45436","Cefficiens_YS314","Cglutamicum_ATCC13032","Cglycinophilum_AJ3170","Chalotolerans_YIM70093","Chumireducens_DSM45392","Cimitans_DSM44264","Ckutscheri_DSM20755","Cmarinum_DSM44953","Cmaris_DSM45190","Cpseudotuberculosis_31","Cpseudotuberculosis_ATC…	0.330154	0.330154	1.97601	0.88372	0.329695	1.97949	258	0
ERS451417_00522	1717.62.peg.526	NA	NA	NA	0.4302	3	Cbelfantii_FRC0043,"Cdiphtheriae_NCTC11397","Crouxii_FRC0190"	0.792198	0.346506	8.24135	0.57588	0.355534	8.28343	130	4	1. 0.48326;2. 8;3. 22;4. 18;5. 8;6. 22;7. 8;8. 22;9. 22;10. V;11. GTG	1. 0.68068;2. 64;3. 190;4. 87;5. 64;6. 190;7. 64;8. 190;9. 190;10. I;11. ATA	1. 0.51135;2. 77;3. 229;4. 100;5. 77;6. 229;7. 77;8. 229;9. 229;10. A;11. GCA	1. 0.46144;2. 115;3. 343;4. 138;5. 115;6. 343;7. 115;8. 343;9. 343;10. A;11. GCG
ERS451417_01470	1717.62.peg.1480	NA	NA	NA	0.4322	4	Cbelfantii_FRC0043,"Cdiphtheriae_NCTC11397","Ckutscheri_DSM20755","Cvitaeruminis_DSM20294"	0.338982	0.26268	1.72756	0.273471	0.273461	1.7548	2	2	1. 0.53434;2. 29;3. 85;4. 58;5. 29;6. 85;7. 29;8. 85;9. 13;10. I;11. ATT	1. 0.67423;2. 38;3. 112;4. 67;5. 38;6. 112;7. 38;8. 112;9. 40;10. T;11. ACG
ERS451417_01990	1717.62.peg.1991	NA	NA	NA	0.4348	7	Cbelfantii_FRC0043,"Cdiphtheriae_NCTC11397","Cpseudotuberculosis_ATCC19410","Csilvaticum_KL0182","Culcerans_NCTC12077","Culcerans_NCTC7910","Cvitaeruminis_DSM20294"	0.283667	0.245678	3.15403	0.24758	0.24758	3.145	2	2	1. 0.57963;2. 40;3. 118;4. 108;5. 77;6. 229;7. 77;8. 229;9. 76;10. N;11. AAC	1. 0.61362;2. 158;3. 472;4. 295;5. 198;6. 592;7. 198;8. 592;9. 412;10. A;11. GCC
ERS451417_01015	1717.62.peg.1026	NA	NA	NA	0.4369	39	Cargentoratense_DSM44202,"Catypicum_R2070","Caurimucosum_ATCC700975","Cbelfantii_FRC0043","Ccallunae_DSM20147","Ccamporealensis_DSM44610","Cdeserti_GIMN1010","Cdiphtheriae_NCTC11397","Cdoosanense_DSM45436","Cefficiens_YS314","Cepidermidicanis_DSM45586","Cfalsenii_DSM44353","Cglutamicum_ATCC13032","Cglycinophilum_AJ3170","Chalotolerans_YIM70093","Chumireducens_DSM45392","Cimitans_DSM44264","Cjeike…	0.463457	0.115919	1.70856	0.243711	0.115929	1.70912	2	2	1. 0.83919;2. 50;3. 148;4. 66;5. 66;6. 196;7. 76;8. 226;9. 121;10. A;11. GCA	1. 0.83762;2. 144;3. 430;4. 160;5. 160;6. 478;7. 170;8. 508;9. 403;10. I;11. ATA
ERS451417_00997	1717.62.peg.1008	NA	NA	NA	0.4376	3	Cbelfantii_FRC0043,"Cdiphtheriae_NCTC11397","Crouxii_FRC0190"	0.805678	0.472119	3.79245	0.650081	0.487586	3.80426	130	3	1. 0.41661;2. 117;3. 349;4. 125;5. 125;6. 373;7. 125;8. 373;9. 349;10. V;11. GTG	1. 0.40664;2. 158;3. 472;4. 166;5. 166;6. 496;7. 166;8. 496;9. 472;10. R;11. CGG	1. 0.65075;2. 163;3. 487;4. 171;5. 171;6. 511;7. 171;8. 511;9. 487;10. M;11. ATG
ERS451417_00072	1717.62.peg.68	NA	NA	NA	0.4544	3	Cbelfantii_FRC0043,"Cdiphtheriae_NCTC11397","Crouxii_FRC0190"	0.210585	0.08361		1	0.0750592		130	2	1. 0.55924;2. 26;3. 76;4. 26;5. 26;6. 76;7. 26;8. 76;9. 76;10. N;11. AAC	1. 0.54868;2. 28;3. 82;4. 28;5. 28;6. 82;7. 28;8. 82;9. 82;10. T;11. ACC
ERS451417_02085	1717.62.peg.2099	NA	NA	NA	0.4624	4	Cbelfantii_FRC0043,"Cdiphtheriae_NCTC11397","Cmustelae_DSM45274","Crouxii_FRC0190"	999	0.143123	2.20287	1	0.145687	2.19831	260	0
ERS451417_00377	1717.62.peg.377	NA	NA	NA	0.4711	4	Cdiphtheriae_NCTC11397,"Crouxii_FRC0190","Csimulans_PES1","Culcerans_NCTC12077"	79.6768	0.32259	7.08354	0.881387	0.322425	7.46432	7168	1	1. 0.92445;2. 28;3. 82;4. 31;5. 28;6. 82;7. 28;8. 82;9. 79;10. P;11. CCC
ERS451417_01147	1717.62.peg.1158	NA	NA	NA	0.4786	39	Cargentoratense_DSM44202,"Catypicum_R2070","Caurimucosum_ATCC700975","Cbelfantii_FRC0043","Ccallunae_DSM20147","Ccamporealensis_DSM44610","Cdeserti_GIMN1010","Cdiphtheriae_NCTC11397","Cdoosanense_DSM45436","Cefficiens_YS314","Cepidermidicanis_DSM45586","Cfalsenii_DSM44353","Cglutamicum_ATCC13032","Cglycinophilum_AJ3170","Chalotolerans_YIM70093","Chumireducens_DSM45392","Cimitans_DSM44264","Cjeike…	0.086479	0.0744307	1.48488	0.0744302	0.0744302	1.48462	2	3	1. 0.40033;2. 238;3. 712;4. 248;5. 248;6. 742;7. 257;8. 769;9. 649;10. L;11. CTC	1. 0.73287;2. 451;3. 1351;4. 461;5. 461;6. 1381;7. 470;8. 1408;9. 1288;10. K;11. AAG	1. 0.46034;2. 571;3. 1711;4. 581;5. 581;6. 1741;7. 590;8. 1768;9. 1648;10. T;11. ACT
ERS451417_02098	1717.62.peg.2112	NA	NA	NA	0.479	3	Cdiphtheriae_NCTC11397,"Csimulans_PES1","Csingulare_IBSB52218"	999	1		1	1		4484	0
ERS451417_01751	1717.62.peg.1754	NA	NA	NA	0.502	8	Cbelfantii_FRC0043,"Cdiphtheriae_NCTC11397","Ckutscheri_DSM20755","Cpseudotuberculosis_ATCC19410","Csilvaticum_KL0182","Culcerans_NCTC12077","Culcerans_NCTC7910","Cvitaeruminis_DSM20294"	0.0924028	0.0554694	2.01438	0.0626985	0.0626985	2.00975	2	1	1. 0.47744;2. 8;3. 22;4. 47;5. 8;6. 22;7. 8;8. 22;9. 16;10. T;11. ACA
ERS451417_00574	1717.62.peg.577	NA	NA	NA	0.5227	3	Cbelfantii_FRC0043,"Cdiphtheriae_NCTC11397","Crouxii_FRC0190"	999	0.10185	2.97158	1	0.10572	3.13366	388	0
ERS451417_01233	1717.62.peg.1241	NA	NA	NA	0.5356	14	Cargentoratense_DSM44202,"Cbelfantii_FRC0043","Cdiphtheriae_NCTC11397","Cepidermidicanis_DSM45586","Ckutscheri_DSM20755","Clactis_RW25","Cmustelae_DSM45274","Cpseudotuberculosis_31","Cpseudotuberculosis_ATCC19410","Crouxii_FRC0190","Csilvaticum_KL0182","Culcerans_NCTC12077","Culcerans_NCTC7910","Cvitaeruminis_DSM20294"	0.170755	0.152661	2.84889	0.152791	0.152791	2.84372	2	2	1. 0.58107;2. 427;3. 1279;4. 476;5. 476;6. 1426;7. 578;8. 1732;9. 1081;10. M;11. ATG	1. 0.54952;2. 473;3. 1417;4. 522;5. 522;6. 1564;7. 624;8. 1870;9. 1219;10. I;11. ATC
ERS451417_00393	1717.62.peg.393	NA	NA	NA	0.5414	39	Cargentoratense_DSM44202,"Catypicum_R2070","Caurimucosum_ATCC700975","Cbelfantii_FRC0043","Ccallunae_DSM20147","Ccamporealensis_DSM44610","Cdeserti_GIMN1010","Cdiphtheriae_NCTC11397","Cdoosanense_DSM45436","Cefficiens_YS314","Cepidermidicanis_DSM45586","Cfalsenii_DSM44353","Cglutamicum_ATCC13032","Cglycinophilum_AJ3170","Chalotolerans_YIM70093","Chumireducens_DSM45392","Cimitans_DSM44264","Cjeike…	0.145821	0.145821	1.81737	0.222401	0.145505	1.82782	258	0
ERS451417_00669	1717.62.peg.674	NA	NA	NA	0.549	8	Cargentoratense_DSM44202,"Caurimucosum_ATCC700975","Cbelfantii_FRC0043","Cdiphtheriae_NCTC11397","Cjeikeium_K41","Ckutscheri_DSM20755","Csimulans_PES1","Csingulare_IBSB52218"	999	0.220424	2.13987	1	0.221124	2.13575	2052	1	1. 0.97999;2. 88;3. 262;4. 172;5. 105;6. 313;7. 105;8. 313;9. 172;10. Q;11. CAA
ERS451417_01460	1717.62.peg.1470	NA	NA	NA	0.5517	29	Caurimucosum_ATCC700975,"Cbelfantii_FRC0043","Ccallunae_DSM20147","Ccamporealensis_DSM44610","Cdeserti_GIMN1010","Cdiphtheriae_NCTC11397","Cdoosanense_DSM45436","Cefficiens_YS314","Cepidermidicanis_DSM45586","Cfalsenii_DSM44353","Chalotolerans_YIM70093","Chumireducens_DSM45392","Cimitans_DSM44264","Ckroppenstedtii_DSM44385","Ckutscheri_DSM20755","Clactis_RW25","Cmarinum_DSM44953","Cmaris_DSM45190…	170.614	0.223533	1.49973	1	0.223793	1.49941	3332	0
ERS451417_01658	1717.62.peg.1665	NA	NA	NA	0.5594	24	Cargentoratense_DSM44202,"Cbelfantii_FRC0043","Ccallunae_DSM20147","Cdeserti_GIMN1010","Cdiphtheriae_NCTC11397","Cdoosanense_DSM45436","Cefficiens_YS314","Cepidermidicanis_DSM45586","Cglutamicum_ATCC13032","Chalotolerans_YIM70093","Chumireducens_DSM45392","Ckroppenstedtii_DSM44385","Ckutscheri_DSM20755","Clactis_RW25","Cmarinum_DSM44953","Cmaris_DSM45190","Cmustelae_DSM45274","Cpseudotuberculosis…	0.246278	0.191552	1.70593	0.191627	0.191627	1.70529	1026	2	1. 0.73938;2. 109;3. 325;4. 144;5. 134;6. 400;7. 154;8. 460;9. 211;10. V;11. GTA	1. 0.75997;2. 187;3. 559;4. 225;5. 212;6. 634;7. 232;8. 694;9. 445;10. S;11. TCA
ERS451417_02004	1717.62.peg.2008	NA	NA	NA	0.5601	7	Cbelfantii_FRC0043,"Cdiphtheriae_NCTC11397","Cpseudotuberculosis_31","Cpseudotuberculosis_ATCC19410","Csilvaticum_KL0182","Culcerans_NCTC12077","Culcerans_NCTC7910"	0.279085	0.0967854	6.04152	0.208887	0.0971903	6.03095	2	2	1. 0.65854;2. 41;3. 121;4. 75;5. 41;6. 121;7. 41;8. 121;9. 121;10. G;11. GGG	1. 0.80981;2. 216;3. 646;4. 253;5. 216;6. 646;7. 216;8. 646;9. 646;10. D;11. GAT
ERS451417_01599	1717.62.peg.1608	NA	NA	NA	0.5628	27	Catypicum_R2070,"Cbelfantii_FRC0043","Ccallunae_DSM20147","Ccamporealensis_DSM44610","Cdeserti_GIMN1010","Cdiphtheriae_NCTC11397","Cdoosanense_DSM45436","Cefficiens_YS314","Cepidermidicanis_DSM45586","Cglutamicum_ATCC13032","Chalotolerans_YIM70093","Chumireducens_DSM45392","Cimitans_DSM44264","Ckutscheri_DSM20755","Cmarinum_DSM44953","Cpseudotuberculosis_31","Cpseudotuberculosis_ATCC19410","Crieg…	0.909145	0.398308	1.80842	0.591593	0.39841	1.80741	3072	2	1. 0.90432;2. 29;3. 85;4. 51;5. 32;6. 94;7. 35;8. 103;9. 76;10. I;11. ATA	1. 0.41084;2. 62;3. 184;4. 86;5. 66;6. 196;7. 69;8. 205;9. 142;10. V;11. GTT
ERS451417_00475	1717.62.peg.478	NA	NA	NA	0.5633	39	Cargentoratense_DSM44202,"Catypicum_R2070","Caurimucosum_ATCC700975","Cbelfantii_FRC0043","Ccallunae_DSM20147","Ccamporealensis_DSM44610","Cdeserti_GIMN1010","Cdiphtheriae_NCTC11397","Cdoosanense_DSM45436","Cefficiens_YS314","Cepidermidicanis_DSM45586","Cfalsenii_DSM44353","Cglutamicum_ATCC13032","Cglycinophilum_AJ3170","Chalotolerans_YIM70093","Chumireducens_DSM45392","Cimitans_DSM44264","Cjeike…	0.455804	0.183564	1.88121	0.216127	0.183693	1.88062	2050	2	1. 0.62818;2. 116;3. 346;4. 117;5. 117;6. 349;7. 117;8. 349;9. 244;10. A;11. GCT	1. 0.68756;2. 163;3. 487;4. 164;5. 164;6. 490;7. 164;8. 490;9. 385;10. N;11. AAT
ERS451417_01577	1717.62.peg.1586	NA	NA	NA	0.5646	32	Cargentoratense_DSM44202,"Catypicum_R2070","Caurimucosum_ATCC700975","Cbelfantii_FRC0043","Ccamporealensis_DSM44610","Cdiphtheriae_NCTC11397","Cdoosanense_DSM45436","Cepidermidicanis_DSM45586","Cfalsenii_DSM44353","Cglycinophilum_AJ3170","Chalotolerans_YIM70093","Chumireducens_DSM45392","Cimitans_DSM44264","Cjeikeium_K41","Ckroppenstedtii_DSM44385","Ckutscheri_DSM20755","Cmarinum_DSM44953","Cmari…	999	0.0866191	1.51998	0.99999	0.0865332	1.51916	3332	0
ERS451417_00505	1717.62.peg.509	NA	NA	NA	0.5934	8	Cbelfantii_FRC0043,"Cdiphtheriae_NCTC11397","Cpseudotuberculosis_31","Cpseudotuberculosis_ATCC19410","Crouxii_FRC0190","Csilvaticum_KL0182","Culcerans_NCTC12077","Culcerans_NCTC7910"	999	0.0622943	3.72848	1	0.0629775	3.72293	260	0
ERS451417_00814	1717.62.peg.820	NA	NA	NA	0.6095	3	Cbelfantii_FRC0043,"Cdiphtheriae_NCTC11397","Crouxii_FRC0190"	0.807286	0.16474	4.09863	0.348769	0.167725	4.09751	130	2	1. 0.56066;2. 107;3. 319;4. 107;5. 107;6. 319;7. 107;8. 319;9. 319;10. N;11. AAC	1. 0.76319;2. 127;3. 379;4. 127;5. 127;6. 379;7. 127;8. 379;9. 379;10. K;11. AAA
ERS451417_02362	1717.62.peg.2391	NA	NA	NA	0.6219	11	Caurimucosum_ATCC700975,"Cbelfantii_FRC0043","Cdiphtheriae_NCTC11397","Cpseudotuberculosis_31","Cpseudotuberculosis_ATCC19410","Csilvaticum_KL0182","Csimulans_PES1","Csingulare_IBSB52218","Culcerans_NCTC12077","Culcerans_NCTC7910","Cuterequi_DSM45634"	77.9018	0.225973	2.76826	1	0.226765	2.77759	256	0
ERS451417_00629	1717.62.peg.633	NA	NA	NA	0.6244	38	Cargentoratense_DSM44202,"Caurimucosum_ATCC700975","Cbelfantii_FRC0043","Ccallunae_DSM20147","Ccamporealensis_DSM44610","Cdeserti_GIMN1010","Cdiphtheriae_NCTC11397","Cdoosanense_DSM45436","Cefficiens_YS314","Cepidermidicanis_DSM45586","Cfalsenii_DSM44353","Cglutamicum_ATCC13032","Cglycinophilum_AJ3170","Chalotolerans_YIM70093","Chumireducens_DSM45392","Cimitans_DSM44264","Cjeikeium_K41","Ckroppen…	0.247958	0.0979238	1.92427	0.154326	0.0979331	1.92353	2	1	1. 0.7628;2. 155;3. 463;4. 168;5. 168;6. 502;7. 184;8. 550;9. 382;10. V;11. GTA
ERS451417_00915	1717.62.peg.922	NA	NA	NA	0.625	19	Catypicum_R2070,"Cbelfantii_FRC0043","Ccamporealensis_DSM44610","Cdiphtheriae_NCTC11397","Cepidermidicanis_DSM45586","Cfalsenii_DSM44353","Cglycinophilum_AJ3170","Cjeikeium_K41","Ckroppenstedtii_DSM44385","Clactis_RW25","Cpseudotuberculosis_31","Cpseudotuberculosis_ATCC19410","Crouxii_FRC0190","Csilvaticum_KL0182","Csimulans_PES1","Culcerans_NCTC12077","Culcerans_NCTC7910","Cuterequi_DSM45634","C…	0.161301	0.161301	1.77439	0.165046	0.165046	1.77656	2306	0
ERS451417_02246	1717.62.peg.2273	NA	NA	NA	0.6303	3	Cdiphtheriae_NCTC11397,"Cglycinophilum_AJ3170","Ckroppenstedtii_DSM44385"	0.140192	0.123646	0.86323	0.128324	0.128324	0.87408	4482	0
ERS451417_01416	1717.62.peg.1422	NA	NA	NA	0.6601	35	Cargentoratense_DSM44202,"Catypicum_R2070","Caurimucosum_ATCC700975","Cbelfantii_FRC0043","Ccallunae_DSM20147","Ccamporealensis_DSM44610","Cdeserti_GIMN1010","Cdiphtheriae_NCTC11397","Cdoosanense_DSM45436","Cefficiens_YS314","Cepidermidicanis_DSM45586","Cfalsenii_DSM44353","Cglutamicum_ATCC13032","Cglycinophilum_AJ3170","Chalotolerans_YIM70093","Cimitans_DSM44264","Cjeikeium_K41","Ckroppenstedtii…	154.642	0.105551	1.46039	0.999981	0.105551	1.46043	1028	1	1. 0.6308;2. 45;3. 133;4. 78;5. 78;6. 232;7. 100;8. 298;9. 100;10. I;11. ATC
ERS451417_01875	1717.62.peg.1877	NA	NA	NA	0.6643	7	Cdiphtheriae_NCTC11397,"Cefficiens_YS314","Cmarinum_DSM44953","Csimulans_PES1","Csingulare_IBSB52218","Ctestudinoris_DSM44614","Cvitaeruminis_DSM20294"	3.50582	0.13315	2.55385	0.284267	0.132369	2.5618	6144	7	1. 0.45562;2. 26;3. 76;4. 34;5. 28;6. 82;7. 28;8. 82;9. 19;10. R;11. CGC	1. 0.76835;2. 43;3. 127;4. 51;5. 45;6. 133;7. 45;8. 133;9. 70;10. Q;11. CAG	1. 0.62446;2. 46;3. 136;4. 54;5. 48;6. 142;7. 48;8. 142;9. 79;10. S;11. TCG	1. 0.89136;2. 48;3. 142;4. 56;5. 50;6. 148;7. 50;8. 148;9. 85;10. S;11. TCT	1. 0.43425;2. 51;3. 151;4. 59;5. 53;6. 157;7. 53;8. 157;9. 94;10. D;11. GAT	1. 0.59174;2. 69;3. 205;4. 77;5. 71;6. 211;7. 71;8. 211;9. 145;10. F;11. TTT	1. 0.42915;2. 79;3. 235;4. 87;5. 81;6. 241;7. 81;8. 241;9. 175;10. S;11. AGT
ERS451417_00614	1717.62.peg.618	NA	NA	NA	0.6696	5	Cbelfantii_FRC0043,"Cdiphtheriae_NCTC11397","Cepidermidicanis_DSM45586","Clactis_RW25","Cvitaeruminis_DSM20294"	999	0.0986593	1.78754	1	0.101557	1.79269	260	0
ERS451417_02150	1717.62.peg.2172	NA	NA	NA	0.6716	8	Cbelfantii_FRC0043,"Cdiphtheriae_NCTC11397","Clactis_RW25","Cpseudotuberculosis_31","Cpseudotuberculosis_ATCC19410","Csilvaticum_KL0182","Culcerans_NCTC12077","Culcerans_NCTC7910"	69.9225	0.0792873	2.98161	1	0.0797415	2.98396	256	0
ERS451417_00388	1717.62.peg.388	NA	NA	NA	0.6887	18	Cbelfantii_FRC0043,"Cdiphtheriae_NCTC11397","Cepidermidicanis_DSM45586","Chumireducens_DSM45392","Ckutscheri_DSM20755","Clactis_RW25","Cmarinum_DSM44953","Cmustelae_DSM45274","Cpseudotuberculosis_31","Cpseudotuberculosis_ATCC19410","Crouxii_FRC0190","Csilvaticum_KL0182","Csimulans_PES1","Ctestudinoris_DSM44614","Culcerans_NCTC12077","Culcerans_NCTC7910","Curealyticum_DSM7109","Cvitaeruminis_DSM20…	0.303585	0.140621	1.7875	0.159223	0.141207	1.78829	2	4	1. 0.64861;2. 56;3. 166;4. 170;5. 130;6. 388;7. 187;8. 559;9. 130;10. S;11. TCA	1. 0.51808;2. 148;3. 442;4. 266;5. 222;6. 664;7. 279;8. 835;9. 406;10. T;11. ACG	1. 0.62765;2. 398;3. 1192;4. 548;5. 472;6. 1414;7. 531;8. 1591;9. 1126;10. N;11. AAT	1. 0.63042;2. 553;3. 1657;4. 708;5. 627;6. 1879;7. 686;8. 2056;9. 1591;10. L;11. CTG
ERS451417_00559	1717.62.peg.563	NA	NA	NA	0.6899	22	Cargentoratense_DSM44202,"Caurimucosum_ATCC700975","Cbelfantii_FRC0043","Cdeserti_GIMN1010","Cdiphtheriae_NCTC11397","Cglutamicum_ATCC13032","Cglycinophilum_AJ3170","Cimitans_DSM44264","Cjeikeium_K41","Ckutscheri_DSM20755","Cmustelae_DSM45274","Cpseudotuberculosis_31","Cpseudotuberculosis_ATCC19410","CriegeliiPUDD83A45","Crouxii_FRC0190","Csilvaticum_KL0182","Csimulans_PES1","Csingulare_IBSB52218…	0.37898	0.154334	2.73765	0.250622	0.154362	2.73622	3074	1	1. 0.8075;2. 341;3. 1021;4. 458;5. 414;6. 1240;7. 455;8. 1363;9. 799;10. H;11. CAT
ERS451417_01635	1717.62.peg.1642	NA	NA	NA	0.6943	22	Cargentoratense_DSM44202,"Cbelfantii_FRC0043","Ccallunae_DSM20147","Cdeserti_GIMN1010","Cdiphtheriae_NCTC11397","Cefficiens_YS314","Cepidermidicanis_DSM45586","Cfalsenii_DSM44353","Cglutamicum_ATCC13032","Cglycinophilum_AJ3170","Cjeikeium_K41","Ckroppenstedtii_DSM44385","Clactis_RW25","Cmustelae_DSM45274","Cpseudotuberculosis_31","Cpseudotuberculosis_ATCC19410","Csilvaticum_KL0182","Cterpenotabid…	0.177749	0.151462	1.91944	0.151513	0.151513	1.91827	3074	1	1. 0.65671;2. 290;3. 868;4. 334;5. 317;6. 949;7. 414;8. 1240;9. 664;10. I;11. ATC
ERS451417_01474	1717.62.peg.1484	NA	NA	NA	0.7159	21	Cargentoratense_DSM44202,"Catypicum_R2070","Cbelfantii_FRC0043","Ccallunae_DSM20147","Ccamporealensis_DSM44610","Cdeserti_GIMN1010","Cdiphtheriae_NCTC11397","Cdoosanense_DSM45436","Cfalsenii_DSM44353","Cglycinophilum_AJ3170","Chumireducens_DSM45392","Ckutscheri_DSM20755","Cmaris_DSM45190","Cmustelae_DSM45274","Cpseudotuberculosis_31","Cpseudotuberculosis_ATCC19410","Csilvaticum_KL0182","Csimulans…	87.981	0.318529	2.23227	1	0.318565	2.23137	256	0
ERS451417_01288	1717.62.peg.1296	NA	NA	NA	0.7306	3	Cbelfantii_FRC0043,"Cdiphtheriae_NCTC11397","Cvitaeruminis_DSM20294"	523.477	0.491302	8.97278	0.99993	0.492356	8.86046	388	0
ERS451417_00008	1717.62.peg.9	NA	NA	NA	0.7352	28	Cargentoratense_DSM44202,"Catypicum_R2070","Caurimucosum_ATCC700975","Cbelfantii_FRC0043","Ccallunae_DSM20147","Cdeserti_GIMN1010","Cdiphtheriae_NCTC11397","Cdoosanense_DSM45436","Cefficiens_YS314","Cepidermidicanis_DSM45586","Chalotolerans_YIM70093","Chumireducens_DSM45392","Cimitans_DSM44264","Ckroppenstedtii_DSM44385","Ckutscheri_DSM20755","Cmarinum_DSM44953","Cmaris_DSM45190","Cpseudotubercul…	999	0.201264	1.65012	1	0.20138	1.64938	4	1	1. 0.43725;2. 16;3. 46;4. 45;5. 24;6. 70;7. 24;8. 70;9. 37;10. A;11. GCC
ERS451417_01292	1717.62.peg.1300	NA	NA	NA	0.7398	38	Cargentoratense_DSM44202,"Catypicum_R2070","Caurimucosum_ATCC700975","Cbelfantii_FRC0043","Ccallunae_DSM20147","Ccamporealensis_DSM44610","Cdeserti_GIMN1010","Cdiphtheriae_NCTC11397","Cdoosanense_DSM45436","Cefficiens_YS314","Cepidermidicanis_DSM45586","Cfalsenii_DSM44353","Cglutamicum_ATCC13032","Cglycinophilum_AJ3170","Chalotolerans_YIM70093","Chumireducens_DSM45392","Cimitans_DSM44264","Cjeike…	0.646803	0.17902	1.67476	0.461533	0.179115	1.67473	2050	3	1. 0.84927;2. 161;3. 481;4. 181;5. 181;6. 541;7. 196;8. 586;9. 289;10. A;11. GCT	1. 0.85281;2. 348;3. 1042;4. 370;5. 370;6. 1108;7. 386;8. 1156;9. 793;10. V;11. GTA	1. 0.84535;2. 398;3. 1192;4. 420;5. 420;6. 1258;7. 436;8. 1306;9. 943;10. F;11. TTT
ERS451417_01483	1717.62.peg.1492	NA	NA	NA	0.7439	22	Caurimucosum_ATCC700975,"Cbelfantii_FRC0043","Ccallunae_DSM20147","Cdeserti_GIMN1010","Cdiphtheriae_NCTC11397","Cdoosanense_DSM45436","Cefficiens_YS314","Cepidermidicanis_DSM45586","Cglutamicum_ATCC13032","Chumireducens_DSM45392","Ckutscheri_DSM20755","Cmarinum_DSM44953","Cmustelae_DSM45274","Cpseudotuberculosis_ATCC19410","Csilvaticum_KL0182","Csimulans_PES1","Csingulare_IBSB52218","Ctestudinori…	0.388474	0.388474	2.07297	0.744636	0.388049	2.08011	258	0
ERS451417_01605	1717.62.peg.1614	NA	NA	NA	0.746	38	Cargentoratense_DSM44202,"Catypicum_R2070","Caurimucosum_ATCC700975","Cbelfantii_FRC0043","Ccallunae_DSM20147","Ccamporealensis_DSM44610","Cdeserti_GIMN1010","Cdiphtheriae_NCTC11397","Cdoosanense_DSM45436","Cefficiens_YS314","Cepidermidicanis_DSM45586","Cfalsenii_DSM44353","Cglutamicum_ATCC13032","Cglycinophilum_AJ3170","Chalotolerans_YIM70093","Chumireducens_DSM45392","Cimitans_DSM44264","Cjeike…	0.248444	0.103416	1.67565	0.16554	0.103445	1.67575	2	1	1. 0.80616;2. 190;3. 568;4. 205;5. 205;6. 613;7. 234;8. 700;9. 475;10. S;11. TCT
ERS451417_00895	1717.62.peg.901	NA	NA	NA	0.7475	36	Cargentoratense_DSM44202,"Catypicum_R2070","Caurimucosum_ATCC700975","Cbelfantii_FRC0043","Ccallunae_DSM20147","Ccamporealensis_DSM44610","Cdeserti_GIMN1010","Cdiphtheriae_NCTC11397","Cdoosanense_DSM45436","Cefficiens_YS314","Cepidermidicanis_DSM45586","Cfalsenii_DSM44353","Cglutamicum_ATCC13032","Chalotolerans_YIM70093","Chumireducens_DSM45392","Cimitans_DSM44264","Cjeikeium_K41","Ckroppenstedti…	0.115592	0.102884	1.67167	0.102883	0.102883	1.67151	2	2	1. 0.61367;2. 290;3. 868;4. 309;5. 307;6. 919;7. 364;8. 1090;9. 703;10. V;11. GTC	1. 0.63767;2. 377;3. 1129;4. 401;5. 394;6. 1180;7. 451;8. 1351;9. 964;10. A;11. GCG
ERS451417_00638	1717.62.peg.642	NA	NA	NA	0.7517	17	Cargentoratense_DSM44202,"Cbelfantii_FRC0043","Cdiphtheriae_NCTC11397","Cepidermidicanis_DSM45586","Chalotolerans_YIM70093","Chumireducens_DSM45392","Clactis_RW25","Cmarinum_DSM44953","Cmustelae_DSM45274","Cpseudotuberculosis_31","Cpseudotuberculosis_ATCC19410","Crouxii_FRC0190","Csilvaticum_KL0182","Ctestudinoris_DSM44614","Culcerans_NCTC12077","Culcerans_NCTC7910","Cvitaeruminis_DSM20294"	0.199756	0.181681	1.99022	0.181644	0.181644	1.98935	2050	2	1. 0.66328;2. 156;3. 466;4. 582;5. 167;6. 499;7. 174;8. 520;9. 331;10. S;11. AGT	1. 0.65752;2. 239;3. 715;4. 709;5. 258;6. 772;7. 278;8. 832;9. 496;10. A;11. GCG
ERS451417_02189	1717.62.peg.2215	NA	NA	NA	0.7565	4	Cargentoratense_DSM44202,"Cbelfantii_FRC0043","Cdiphtheriae_NCTC11397","Clactis_RW25"	0.185434	0.174426	2.45482	0.175314	0.175314	2.45074	2	3	1. 0.4819;2. 46;3. 136;4. 46;5. 46;6. 136;7. 46;8. 136;9. 64;10. S;11. TCC	1. 0.4222;2. 348;3. 1042;4. 373;5. 373;6. 1117;7. 387;8. 1159;9. 946;10. G;11. GGT	1. 0.52063;2. 481;3. 1441;4. 506;5. 506;6. 1516;7. 520;8. 1558;9. 1345;10. G;11. GGT
ERS451417_02072	1717.62.peg.2084	NA	NA	NA	0.7747	7	Cbelfantii_FRC0043,"Ccamporealensis_DSM44610","Cdiphtheriae_NCTC11397","Cglutamicum_ATCC13032","Cimitans_DSM44264","Clactis_RW25","CriegeliiPUDD83A45"	122.595	0.128854	1.10872	1	0.128815	1.11052	256	0
ERS451417_01501	1717.62.peg.1509	NA	NA	NA	0.7795	38	Cargentoratense_DSM44202,"Catypicum_R2070","Caurimucosum_ATCC700975","Cbelfantii_FRC0043","Ccallunae_DSM20147","Ccamporealensis_DSM44610","Cdeserti_GIMN1010","Cdiphtheriae_NCTC11397","Cdoosanense_DSM45436","Cefficiens_YS314","Cepidermidicanis_DSM45586","Cfalsenii_DSM44353","Cglutamicum_ATCC13032","Cglycinophilum_AJ3170","Chalotolerans_YIM70093","Chumireducens_DSM45392","Cimitans_DSM44264","Cjeike…	0.383759	0.0764831	1.37063	0.331944	0.0765025	1.37038	1026	2	1. 0.83226;2. 70;3. 208;4. 100;5. 100;6. 298;7. 100;8. 298;9. 199;10. G;11. GGA	1. 0.82969;2. 120;3. 358;4. 150;5. 150;6. 448;7. 150;8. 448;9. 349;10. A;11. GCT
ERS451417_00934	1717.62.peg.943	NA	NA	NA	0.785	16	Cargentoratense_DSM44202,"Catypicum_R2070","Caurimucosum_ATCC700975","Cbelfantii_FRC0043","Cdiphtheriae_NCTC11397","Cdoosanense_DSM45436","Cefficiens_YS314","Cfalsenii_DSM44353","Cglycinophilum_AJ3170","Cimitans_DSM44264","Cjeikeium_K41","CriegeliiPUDD83A45","Csimulans_PES1","Csingulare_IBSB52218","Curealyticum_DSM7109","Cureicelerivorans_IMMIBRIV2301"	999	0.144084	3.44831	1	0.144339	3.4434	3076	1	1. 0.44387;2. 108;3. 322;4. 120;5. 108;6. 322;7. 108;8. 322;9. 238;10. T;11. ACG
ERS451417_01476	1717.62.peg.1486	NA	NA	NA	0.7948	37	Cargentoratense_DSM44202,"Catypicum_R2070","Caurimucosum_ATCC700975","Cbelfantii_FRC0043","Ccallunae_DSM20147","Ccamporealensis_DSM44610","Cdeserti_GIMN1010","Cdiphtheriae_NCTC11397","Cdoosanense_DSM45436","Cefficiens_YS314","Cepidermidicanis_DSM45586","Cglutamicum_ATCC13032","Cglycinophilum_AJ3170","Chalotolerans_YIM70093","Chumireducens_DSM45392","Cimitans_DSM44264","Cjeikeium_K41","Ckroppenste…	0.263916	0.263916	1.69658	0.597322	0.263681	1.69668	3330	0
ERS451417_00935	1717.62.peg.944	NA	NA	NA	0.7952	4	Catypicum_R2070,"Cdiphtheriae_NCTC11397","Csingulare_IBSB52218","Cureicelerivorans_IMMIBRIV2301"	0.386019	0.13236	3.65364	0.33722	0.13251	3.66272	4098	4	1. 0.41103;2. 61;3. 181;4. 61;5. 61;6. 181;7. 61;8. 181;9. 181;10. T;11. ACC	1. 0.72511;2. 90;3. 268;4. 90;5. 90;6. 268;7. 90;8. 268;9. 268;10. T;11. ACC	1. 0.75298;2. 113;3. 337;4. 113;5. 113;6. 337;7. 113;8. 337;9. 337;10. A;11. GCA	1. 0.74061;2. 150;3. 448;4. 150;5. 150;6. 448;7. 150;8. 448;9. 448;10. V;11. GTG
ERS451417_00428	1717.62.peg.429	NA	NA	NA	0.8157	22	Catypicum_R2070,"Caurimucosum_ATCC700975","Ccamporealensis_DSM44610","Cdeserti_GIMN1010","Cdiphtheriae_NCTC11397","Cdoosanense_DSM45436","Cefficiens_YS314","Cglutamicum_ATCC13032","Cglycinophilum_AJ3170","Chalotolerans_YIM70093","Cimitans_DSM44264","Cjeikeium_K41","Ckutscheri_DSM20755","Cmarinum_DSM44953","Cmaris_DSM45190","CriegeliiPUDD83A45","Csimulans_PES1","Csingulare_IBSB52218","Cterpenotabi…	2.22598	0.101383	1.76123	0.148304	0.101072	1.76072	4096	2	1. 0.5667;2. 55;3. 163;4. 75;5. 66;6. 196;7. 66;8. 196;9. 109;10. C;11. TGC	1. 0.69298;2. 132;3. 394;4. 158;5. 149;6. 445;7. 151;8. 451;9. 316;10. S;11. AGT
ERS451417_00483	1717.62.peg.486	NA	NA	NA	0.8242	39	Cargentoratense_DSM44202,"Catypicum_R2070","Caurimucosum_ATCC700975","Cbelfantii_FRC0043","Ccallunae_DSM20147","Ccamporealensis_DSM44610","Cdeserti_GIMN1010","Cdiphtheriae_NCTC11397","Cdoosanense_DSM45436","Cefficiens_YS314","Cepidermidicanis_DSM45586","Cfalsenii_DSM44353","Cglutamicum_ATCC13032","Cglycinophilum_AJ3170","Chalotolerans_YIM70093","Chumireducens_DSM45392","Cimitans_DSM44264","Cjeike…	0.134179	0.0944199	1.9905	0.118281	0.0944683	1.99053	2	2	1. 0.70494;2. 105;3. 313;4. 105;5. 105;6. 313;7. 105;8. 313;9. 313;10. I;11. ATT	1. 0.67581;2. 202;3. 604;4. 202;5. 202;6. 604;7. 204;8. 610;9. 580;10. A;11. GCT
ERS451417_01998	1717.62.peg.2002	NA	NA	NA	0.8246	7	Cbelfantii_FRC0043,"Cdiphtheriae_NCTC11397","Cpseudotuberculosis_31","Cpseudotuberculosis_ATCC19410","Csilvaticum_KL0182","Culcerans_NCTC12077","Culcerans_NCTC7910"	0.360787	0.307646	4.84611	0.339496	0.307907	4.84535	2	1	1. 0.65862;2. 35;3. 103;4. 35;5. 35;6. 103;7. 35;8. 103;9. 103;10. V;11. GTT
ERS451417_00426	1717.62.peg.427	NA	NA	NA	0.8417	7	Cdiphtheriae_NCTC11397,"Cglutamicum_ATCC13032","Chalotolerans_YIM70093","Cjeikeium_K41","Cmarinum_DSM44953","Cmaris_DSM45190","Cvitaeruminis_DSM20294"	0.496522	0.293506	1.40415	0.464064	0.293299	1.39239	4098	19	1. 0.9437;2. 20;3. 58;4. 43;5. 26;6. 76;7. 33;8. 97;9. 25;10. S;11. TCC	1. 0.81295;2. 23;3. 67;4. 46;5. 29;6. 85;7. 36;8. 106;9. 34;10. P;11. CCC	1. 0.93887;2. 27;3. 79;4. 50;5. 33;6. 97;7. 40;8. 118;9. 46;10. S;11. TCG	1. 0.40633;2. 28;3. 82;4. 51;5. 34;6. 100;7. 41;8. 121;9. 49;10. A;11. GCG	1. 0.89333;2. 30;3. 88;4. 53;5. 36;6. 106;7. 43;8. 127;9. 55;10. L;11. CTG	1. 0.46809;2. 34;3. 100;4. 57;5. 40;6. 118;7. 47;8. 139;9. 67;10. V;11. GTA	1. 0.67008;2. 36;3. 106;4. 59;5. 42;6. 124;7. 49;8. 145;9. 73;10. S;11. TCT	1. 0.9646;2. 56;3. 166;4. 97;5. 62;6. 184;7. 71;8. 211;9. 88;10. T;11. ACC	1. 0.54151;2. 57;3. 169;4. 98;5. 63;6. 187;7. 72;8. 214;9. 91;10. S;11. AGT	1. 0.49538;2. 67;3. 199;4. 108;5. 73;6. 217;7. 82;8. 244;9. 121;10. E;11. GAA	1. 0.48281;2. 82;3. 244;4. 123;5. 88;6. 262;7. 97;8. 289;9. 166;10. R;11. AGA	1. 0.47176;2. 83;3. 247;4. 124;5. 89;6. 265;7. 98;8. 292;9. 169;10. T;11. ACT	1. 0.46156;2. 84;3. 250;4. 125;5. 90;6. 268;7. 99;8. 295;9. 172;10. K;11. AAG	1. 0.98021;2. 104;3. 310;4. 145;5. 110;6. 328;7. 119;8. 355;9. 232;10. Q;11. CAA	1. 0.9832;2. 111;3. 331;4. 152;5. 117;6. 349;7. 126;8. 376;9. 253;10. S;11. AGT	1. 0.44449;2. 126;3. 376;4. 167;5. 132;6. 394;7. 141;8. 421;9. 298;10. V;11. GTA	1. 0.73842;2. 150;3. 448;4. 191;5. 156;6. 466;7. 165;8. 493;9. 370;10. W;11. TGG	1. 0.93745;2. 151;3. 451;4. 192;5. 157;6. 469;7. 166;8. 496;9. 373;10. S;11. TCG	1. 0.45982;2. 156;3. 466;4. 197;5. 162;6. 484;7. 171;8. 511;9. 388;10. V;11. GTA
ERS451417_02279	1717.62.peg.2308	NA	NA	NA	0.8473	14	Cbelfantii_FRC0043,"Ccamporealensis_DSM44610","Cdiphtheriae_NCTC11397","Cepidermidicanis_DSM45586","Cfalsenii_DSM44353","Cglycinophilum_AJ3170","Chalotolerans_YIM70093","Chumireducens_DSM45392","Cjeikeium_K41","Clactis_RW25","Cmarinum_DSM44953","CriegeliiPUDD83A45","Cterpenotabidum_Y11","Cureicelerivorans_IMMIBRIV2301"	13.6428	0.149867	1.51526	1	0.149906	1.51561	256	0
ERS451417_01678	1717.62.peg.1685	NA	NA	NA	0.8503	6	Cbelfantii_FRC0043,"Cdiphtheriae_NCTC11397","Cpseudotuberculosis_31","Cpseudotuberculosis_ATCC19410","Culcerans_NCTC12077","Culcerans_NCTC7910"	0.101869	0.101869	2.03007	0.129801	0.0971232	1.99951	2306	0
ERS451417_01224	1717.62.peg.1232	NA	NA	NA	0.8697	26	Catypicum_R2070,"Cbelfantii_FRC0043","Ccallunae_DSM20147","Cdeserti_GIMN1010","Cdiphtheriae_NCTC11397","Cdoosanense_DSM45436","Cefficiens_YS314","Cepidermidicanis_DSM45586","Cglutamicum_ATCC13032","Chalotolerans_YIM70093","Chumireducens_DSM45392","Cimitans_DSM44264","Ckutscheri_DSM20755","Cmarinum_DSM44953","Cmaris_DSM45190","Cmustelae_DSM45274","Cpseudotuberculosis_ATCC19410","CriegeliiPUDD83A45…	0.324481	0.228535	1.45769	0.293645	0.228589	1.4576	2	1	1. 0.67042;2. 100;3. 298;4. 144;5. 139;6. 415;7. 162;8. 484;9. 250;10. Q;11. CAA
ERS451417_00533	1717.62.peg.537	NA	NA	NA	0.8766	12	Cbelfantii_FRC0043,"Ccallunae_DSM20147","Cdeserti_GIMN1010","Cdiphtheriae_NCTC11397","Cefficiens_YS314","Cglutamicum_ATCC13032","Chalotolerans_YIM70093","Chumireducens_DSM45392","Cmarinum_DSM44953","Crouxii_FRC0190","Ctestudinoris_DSM44614","Cvitaeruminis_DSM20294"	1.21267	0.0981566	1.86655	1	0.0981761	1.8659	3072	3	1. 0.9047;2. 24;3. 70;4. 40;5. 40;6. 118;7. 43;8. 127;9. 16;10. L;11. CTA	1. 0.9563;2. 80;3. 238;4. 96;5. 96;6. 286;7. 108;8. 322;9. 136;10. N;11. AAC	1. 0.95613;2. 106;3. 316;4. 122;5. 122;6. 364;7. 134;8. 400;9. 214;10. T;11. ACC
ERS451417_01856	1717.62.peg.1858	NA	NA	NA	0.8845	33	Cargentoratense_DSM44202,"Catypicum_R2070","Caurimucosum_ATCC700975","Cbelfantii_FRC0043","Ccallunae_DSM20147","Ccamporealensis_DSM44610","Cdeserti_GIMN1010","Cdiphtheriae_NCTC11397","Cdoosanense_DSM45436","Cefficiens_YS314","Cepidermidicanis_DSM45586","Cfalsenii_DSM44353","Cglutamicum_ATCC13032","Chalotolerans_YIM70093","Chumireducens_DSM45392","Cimitans_DSM44264","Cjeikeium_K41","Ckroppenstedti…	0.142706	0.104497	1.27114	0.126542	0.104516	1.2715	3074	2	1. 0.68601;2. 35;3. 103;4. 36;5. 36;6. 106;7. 36;8. 106;9. 43;10. I;11. ATA	1. 0.60109;2. 110;3. 328;4. 111;5. 111;6. 331;7. 111;8. 331;9. 268;10. T;11. ACC
ERS451417_00276	1717.62.peg.273	NA	NA	NA	0.888	3	Cdiphtheriae_NCTC11397,"Ckutscheri_DSM20755","Crouxii_FRC0190"	1.16801	0.502903	4.62363	1	0.503314	4.58142	4224	9	1. 0.78938;2. 6;3. 16;4. 32;5. 6;6. 16;7. 6;8. 16;9. 13;10. T;11. ACT	1. 0.44889;2. 78;3. 232;4. 111;5. 78;6. 232;7. 78;8. 232;9. 202;10. P;11. CCG	1. 0.43574;2. 89;3. 265;4. 124;5. 89;6. 265;7. 89;8. 265;9. 235;10. Q;11. CAA	1. 0.90245;2. 122;3. 364;4. 158;5. 122;6. 364;7. 122;8. 364;9. 334;10. V;11. GTC	1. 0.50544;2. 124;3. 370;4. 160;5. 124;6. 370;7. 124;8. 370;9. 340;10. A;11. GCG	1. 0.85614;2. 163;3. 487;4. 203;5. 163;6. 487;7. 163;8. 487;9. 457;10. V;11. GTT	1. 0.53869;2. 174;3. 520;4. 214;5. 174;6. 520;7. 174;8. 520;9. 490;10. I;11. ATC	1. 0.84437;2. 195;3. 583;4. 235;5. 195;6. 583;7. 195;8. 583;9. 553;10. N;11. AAC	1. 0.49271;2. 207;3. 619;4. 257;5. 207;6. 619;7. 207;8. 619;9. 589;10. P;11. CCT
ERS451417_00856	1717.62.peg.861	NA	NA	NA	0.8943	3	Cbelfantii_FRC0043,"Cdiphtheriae_NCTC11397","Crouxii_FRC0190"	0.773853	0.196548	3.58433	0.74795	0.196682	3.58032	130	7	1. 0.78343;2. 10;3. 28;4. 52;5. 10;6. 28;7. 10;8. 28;9. 28;10. T;11. ACC	1. 0.66527;2. 25;3. 73;4. 67;5. 25;6. 73;7. 25;8. 73;9. 73;10. T;11. ACC	1. 0.7356;2. 132;3. 394;4. 209;5. 132;6. 394;7. 132;8. 394;9. 394;10. H;11. CAC	1. 0.71316;2. 214;3. 640;4. 292;5. 214;6. 640;7. 214;8. 640;9. 640;10. F;11. TTC	1. 0.458;2. 242;3. 724;4. 322;5. 242;6. 724;7. 242;8. 724;9. 724;10. S;11. AGC	1. 0.79018;2. 298;3. 892;4. 390;5. 298;6. 892;7. 298;8. 892;9. 892;10. L;11. TTG	1. 0.69676;2. 330;3. 988;4. 422;5. 330;6. 988;7. 330;8. 988;9. 988;10. I;11. ATT
ERS451417_00139	1717.62.peg.138	NA	NA	NA	0.9049	9	Cbelfantii_FRC0043,"Cdiphtheriae_NCTC11397","Cpseudotuberculosis_31","Cpseudotuberculosis_ATCC19410","Crouxii_FRC0190","Csilvaticum_KL0182","Culcerans_NCTC12077","Culcerans_NCTC7910","Cvitaeruminis_DSM20294"	0.105322	0.0887941	2.61214	0.0988079	0.088754	2.61262	2050	2	1. 0.64063;2. 169;3. 505;4. 197;5. 184;6. 550;7. 205;8. 613;9. 190;10. I;11. ATA	1. 0.40871;2. 200;3. 598;4. 229;5. 215;6. 643;7. 236;8. 706;9. 283;10. T;11. ACC
ERS451417_01772	1717.62.peg.1774	NA	NA	NA	0.9056	20	Catypicum_R2070,"Cbelfantii_FRC0043","Ccallunae_DSM20147","Ccamporealensis_DSM44610","Cdeserti_GIMN1010","Cdiphtheriae_NCTC11397","Cefficiens_YS314","Cfalsenii_DSM44353","Cglutamicum_ATCC13032","Chalotolerans_YIM70093","Cimitans_DSM44264","Cjeikeium_K41","Cmarinum_DSM44953","Cpseudotuberculosis_31","Cpseudotuberculosis_ATCC19410","Csimulans_PES1","Culcerans_NCTC12077","Culcerans_NCTC7910","Cureal…	0.192552	0.191164	2.02947	0.191154	0.191154	2.02933	3074	5	1. 0.61075;2. 77;3. 229;4. 114;5. 114;6. 340;7. 146;8. 436;9. 193;10. A;11. GCA	1. 0.4262;2. 81;3. 241;4. 118;5. 118;6. 352;7. 150;8. 448;9. 205;10. F;11. TTT	1. 0.5017;2. 122;3. 364;4. 159;5. 159;6. 475;7. 191;8. 571;9. 328;10. H;11. CAC	1. 0.43121;2. 255;3. 763;4. 297;5. 297;6. 889;7. 330;8. 988;9. 697;10. N;11. AAC	1. 0.50904;2. 287;3. 859;4. 329;5. 329;6. 985;7. 362;8. 1084;9. 793;10. L;11. TTG
ERS451417_01489	1717.62.peg.1497	NA	NA	NA	0.9095	38	Cargentoratense_DSM44202,"Catypicum_R2070","Caurimucosum_ATCC700975","Cbelfantii_FRC0043","Ccallunae_DSM20147","Ccamporealensis_DSM44610","Cdeserti_GIMN1010","Cdiphtheriae_NCTC11397","Cdoosanense_DSM45436","Cefficiens_YS314","Cepidermidicanis_DSM45586","Cfalsenii_DSM44353","Cglutamicum_ATCC13032","Cglycinophilum_AJ3170","Chalotolerans_YIM70093","Chumireducens_DSM45392","Cimitans_DSM44264","Cjeike…	0.259445	0.224167	1.69935	0.249383	0.224148	1.69934	2	1	1. 0.80295;2. 45;3. 133;4. 76;5. 76;6. 226;7. 117;8. 349;9. 73;10. S;11. AGC
ERS451417_01463	1717.62.peg.1473	NA	NA	NA	0.9095	30	Cargentoratense_DSM44202,"Catypicum_R2070","Caurimucosum_ATCC700975","Cbelfantii_FRC0043","Ccallunae_DSM20147","Ccamporealensis_DSM44610","Cdeserti_GIMN1010","Cdiphtheriae_NCTC11397","Cdoosanense_DSM45436","Cefficiens_YS314","Cepidermidicanis_DSM45586","Cglutamicum_ATCC13032","Chalotolerans_YIM70093","Chumireducens_DSM45392","Cimitans_DSM44264","Ckutscheri_DSM20755","Cmarinum_DSM44953","Cmaris_DS…	33.4645	0.05805	1.25257	1	0.05807	1.25258	3328	0
ERS451417_00214	1717.62.peg.211	NA	NA	NA	0.911	6	Cbelfantii_FRC0043,"Cdiphtheriae_NCTC11397","Cmustelae_DSM45274","Cpseudotuberculosis_31","Cpseudotuberculosis_ATCC19410","Crouxii_FRC0190"	0.282227	0.0966925	3.41764	0.260599	0.0968388	3.41787	2	3	1. 0.75578;2. 16;3. 46;4. 503;5. 16;6. 46;7. 16;8. 46;9. 46;10. T;11. ACG	1. 0.8123;2. 25;3. 73;4. 512;5. 25;6. 73;7. 25;8. 73;9. 73;10. L;11. CTC	1. 0.41705;2. 60;3. 178;4. 673;5. 60;6. 178;7. 60;8. 178;9. 178;10. S;11. AGC
ERS451417_00786	1717.62.peg.793	NA	NA	NA	0.9116	4	Cbelfantii_FRC0043,"Cdiphtheriae_NCTC11397","Crouxii_FRC0190","Culcerans_NCTC12077"	0.417828	0.277139	1.57979	0.398979	0.277421	1.58005	2	2	1. 0.52841;2. 127;3. 379;4. 140;5. 139;6. 415;7. 145;8. 433;9. 307;10. S;11. AGC	1. 0.58895;2. 373;3. 1117;4. 403;5. 388;6. 1162;7. 395;8. 1183;9. 1015;10. E;11. GAA
ERS451417_01952	1717.62.peg.1952	NA	NA	NA	0.9165	14	Ccallunae_DSM20147,"Cdeserti_GIMN1010","Cdiphtheriae_NCTC11397","Cdoosanense_DSM45436","Cefficiens_YS314","Cglutamicum_ATCC13032","Chalotolerans_YIM70093","Chumireducens_DSM45392","Ckroppenstedtii_DSM44385","Clactis_RW25","Cmarinum_DSM44953","Cmaris_DSM45190","Ctestudinoris_DSM44614","Cvitaeruminis_DSM20294"	0.27681	0.161843	1.51062	0.2665	0.161809	1.51037	6146	21	1. 0.74915;2. 64;3. 190;4. 99;5. 99;6. 295;7. 119;8. 355;9. 4;10. I;11. ATC	1. 0.77465;2. 86;3. 256;4. 121;5. 121;6. 361;7. 141;8. 421;9. 70;10. R;11. CGC	1. 0.73496;2. 101;3. 301;4. 136;5. 136;6. 406;7. 156;8. 466;9. 115;10. L;11. TTG	1. 0.81628;2. 125;3. 373;4. 178;5. 160;6. 478;7. 180;8. 538;9. 187;10. A;11. GCA	1. 0.82712;2. 127;3. 379;4. 180;5. 162;6. 484;7. 182;8. 544;9. 193;10. T;11. ACG	1. 0.89576;2. 176;3. 526;4. 232;5. 214;6. 640;7. 238;8. 712;9. 307;10. G;11. GGT	1. 0.77574;2. 188;3. 562;4. 244;5. 226;6. 676;7. 250;8. 748;9. 343;10. R;11. CGC	1. 0.84741;2. 190;3. 568;4. 246;5. 228;6. 682;7. 252;8. 754;9. 349;10. S;11. TCC	1. 0.75116;2. 198;3. 592;4. 254;5. 236;6. 706;7. 260;8. 778;9. 373;10. I;11. ATC	1. 0.8801;2. 207;3. 619;4. 263;5. 245;6. 733;7. 269;8. 805;9. 400;10. E;11. GAG	1. 0.84642;2. 209;3. 625;4. 265;5. 247;6. 739;7. 271;8. 811;9. 406;10. H;11. CAC	1. 0.96161;2. 254;3. 760;4. 318;5. 294;6. 880;7. 318;8. 952;9. 538;10. N;11. AAT	1. 0.91775;2. 288;3. 862;4. 352;5. 328;6. 982;7. 353;8. 1057;9. 628;10. R;11. CGT	1. 0.89222;2. 289;3. 865;4. 353;5. 329;6. 985;7. 354;8. 1060;9. 631;10. N;11. AAT	1. 0.64638;2. 296;3. 886;4. 360;5. 336;6. 1006;7. 361;8. 1081;9. 652;10. R;11. CGG	1. 0.57937;2. 300;3. 898;4. 364;5. 340;6. 1018;7. 365;8. 1093;9. 664;10. L;11. TTG	1. 0.87923;2. 307;3. 919;4. 371;5. 347;6. 1039;7. 372;8. 1114;9. 685;10. P;11. CCG	1. 0.81418;2. 315;3. 943;4. 379;5. 355;6. 1063;7. 380;8. 1138;9. 709;10. Y;11. TAC	1. 0.69317;2. 334;3. 1000;4. 403;5. 379;6. 1135;7. 404;8. 1210;9. 736;10. N;11. AAC	1. 0.89252;2. 354;3. 1060;4. 427;5. 403;6. 1207;7. 428;8. 1282;9. 784;10. F;11. TTT	1. 0.91854;2. 371;3. 1111;4. 444;5. 420;6. 1258;7. 445;8. 1333;9. 835;10. E;11. GAG
ERS451417_02107	1717.62.peg.2122	NA	NA	NA	0.9258	3	Cdiphtheriae_NCTC11397,"Csimulans_PES1","Csingulare_IBSB52218"	0	0		0	0		4482	0
ERS451417_00438	1717.62.peg.441	NA	NA	NA	0.926	13	Caurimucosum_ATCC700975,"Cdeserti_GIMN1010","Cdiphtheriae_NCTC11397","Cefficiens_YS314","Cglutamicum_ATCC13032","Cglycinophilum_AJ3170","Chumireducens_DSM45392","Cmustelae_DSM45274","Csimulans_PES1","Csingulare_IBSB52218","Ctestudinoris_DSM44614","Cuterequi_DSM45634","Cvitaeruminis_DSM20294"	1.11195	0.225759	1.61339	0.99999	0.22665	1.61373	7168	27	1. 0.53751;2. 70;3. 208;4. 400;5. 97;6. 289;7. 159;8. 475;9. 7;10. A;11. GCC	1. 0.96049;2. 75;3. 223;4. 405;5. 102;6. 304;7. 164;8. 490;9. 22;10. L;11. CTC	1. 0.96134;2. 80;3. 238;4. 410;5. 107;6. 319;7. 169;8. 505;9. 37;10. I;11. ATC	1. 0.86339;2. 81;3. 241;4. 411;5. 108;6. 322;7. 170;8. 508;9. 40;10. Q;11. CAG	1. 0.94867;2. 82;3. 244;4. 412;5. 109;6. 325;7. 171;8. 511;9. 43;10. D;11. GAC	1. 0.94395;2. 84;3. 250;4. 415;5. 112;6. 334;7. 174;8. 520;9. 49;10. A;11. GCT	1. 0.92291;2. 90;3. 268;4. 421;5. 118;6. 352;7. 180;8. 538;9. 67;10. T;11. ACC	1. 0.93893;2. 92;3. 274;4. 423;5. 120;6. 358;7. 182;8. 544;9. 73;10. V;11. GTC	1. 0.95343;2. 124;3. 370;4. 456;5. 153;6. 457;7. 233;8. 697;9. 127;10. Q;11. CAG	1. 0.95359;2. 135;3. 403;4. 467;5. 164;6. 490;7. 244;8. 730;9. 160;10. N;11. AAC	1. 0.98481;2. 142;3. 424;4. 474;5. 171;6. 511;7. 251;8. 751;9. 181;10. S;11. AGC	1. 0.9333;2. 157;3. 469;4. 489;5. 186;6. 556;7. 266;8. 796;9. 226;10. D;11. GAT	1. 0.96521;2. 162;3. 484;4. 494;5. 191;6. 571;7. 271;8. 811;9. 241;10. L;11. CTG	1. 0.46601;2. 207;3. 619;4. 539;5. 236;6. 706;7. 316;8. 946;9. 370;10. P;11. CCC	1. 0.95657;2. 221;3. 661;4. 553;5. 250;6. 748;7. 330;8. 988;9. 412;10. H;11. CAC	1. 0.92932;2. 228;3. 682;4. 560;5. 257;6. 769;7. 337;8. 1009;9. 433;10. D;11. GAT	1. 0.9585;2. 238;3. 712;4. 570;5. 267;6. 799;7. 347;8. 1039;9. 463;10. V;11. GTC	1. 0.95901;2. 287;3. 859;4. 619;5. 316;6. 946;7. 404;8. 1210;9. 565;10. G;11. GGC	1. 0.49228;2. 308;3. 922;4. 640;5. 337;6. 1009;7. 425;8. 1273;9. 628;10. G;11. GGC	1. 0.52864;2. 319;3. 955;4. 651;5. 348;6. 1042;7. 436;8. 1306;9. 661;10. V;11. GTC	1. 0.80001;2. 326;3. 976;4. 658;5. 355;6. 1063;7. 443;8. 1327;9. 682;10. K;11. AAG	1. 0.80707;2. 331;3. 991;4. 663;5. 360;6. 1078;7. 448;8. 1342;9. 697;10. E;11. GAG	1. 0.65917;2. 335;3. 1003;4. 667;5. 364;6. 1090;7. 452;8. 1354;9. 709;10. A;11. GCC	1. 0.96226;2. 345;3. 1033;4. 677;5. 374;6. 1120;7. 462;8. 1384;9. 739;10. S;11. TCC	1. 0.43977;2. 347;3. 1039;4. 679;5. 376;6. 1126;7. 464;8. 1390;9. 745;10. A;11. GCC	1. 0.56726;2. 348;3. 1042;4. 680;5. 377;6. 1129;7. 465;8. 1393;9. 748;10. E;11. GAG	1. 0.98546;2. 349;3. 1045;4. 681;5. 378;6. 1132;7. 466;8. 1396;9. 751;10. F;11. TTC
ERS451417_00735	1717.62.peg.738	NA	NA	NA	0.9278	9	Catypicum_R2070,"Cbelfantii_FRC0043","Cdiphtheriae_NCTC11397","Cpseudotuberculosis_31","Cpseudotuberculosis_ATCC19410","Crouxii_FRC0190","Csilvaticum_KL0182","Culcerans_NCTC12077","Culcerans_NCTC7910"	0.203741	0.197851	2.77091	0.198469	0.198225	2.7705	2	2	1. 0.57807;2. 53;3. 157;4. 78;5. 78;6. 232;7. 89;8. 265;9. 118;10. N;11. AAC	1. 0.4994;2. 130;3. 388;4. 155;5. 155;6. 463;7. 166;8. 496;9. 349;10. D;11. GAT
ERS451417_00140	1717.62.peg.139	NA	NA	NA	0.9361	39	Cargentoratense_DSM44202,"Catypicum_R2070","Caurimucosum_ATCC700975","Cbelfantii_FRC0043","Ccallunae_DSM20147","Ccamporealensis_DSM44610","Cdeserti_GIMN1010","Cdiphtheriae_NCTC11397","Cdoosanense_DSM45436","Cefficiens_YS314","Cepidermidicanis_DSM45586","Cfalsenii_DSM44353","Cglutamicum_ATCC13032","Cglycinophilum_AJ3170","Chalotolerans_YIM70093","Chumireducens_DSM45392","Cimitans_DSM44264","Cjeike…	0.0600552	0.0568143	2.22665	0.0576973	0.0568239	2.22652	1026	1	1. 0.55356;2. 138;3. 412;4. 141;5. 141;6. 421;7. 141;8. 421;9. 409;10. D;11. GAT
ERS451417_02094	1717.62.peg.2108	NA	NA	NA	0.9363	3	Cdiphtheriae_NCTC11397,"Csimulans_PES1","Csingulare_IBSB52218"	0.684242	0.684242		0.687215	0.687215		4482	0
ERS451417_01417	1717.62.peg.1423	NA	NA	NA	0.9385	38	Cargentoratense_DSM44202,"Catypicum_R2070","Caurimucosum_ATCC700975","Cbelfantii_FRC0043","Ccallunae_DSM20147","Ccamporealensis_DSM44610","Cdeserti_GIMN1010","Cdiphtheriae_NCTC11397","Cdoosanense_DSM45436","Cefficiens_YS314","Cepidermidicanis_DSM45586","Cfalsenii_DSM44353","Cglutamicum_ATCC13032","Cglycinophilum_AJ3170","Chalotolerans_YIM70093","Chumireducens_DSM45392","Cimitans_DSM44264","Cjeike…	0.759293	0.152598	1.5601	0.97889	0.15258	1.56042	1026	2	1. 0.93229;2. 125;3. 373;4. 162;5. 162;6. 484;7. 209;8. 625;9. 283;10. R;11. AGG	1. 0.93449;2. 210;3. 628;4. 247;5. 247;6. 739;7. 294;8. 880;9. 538;10. Y;11. TAT
ERS451417_01189	1717.62.peg.1198	NA	NA	NA	0.9388	24	Cargentoratense_DSM44202,"Cbelfantii_FRC0043","Cdiphtheriae_NCTC11397","Cefficiens_YS314","Cepidermidicanis_DSM45586","Cfalsenii_DSM44353","Cglutamicum_ATCC13032","Cglycinophilum_AJ3170","Chumireducens_DSM45392","Cimitans_DSM44264","Ckroppenstedtii_DSM44385","Ckutscheri_DSM20755","Clactis_RW25","Cpseudotuberculosis_31","Cpseudotuberculosis_ATCC19410","CriegeliiPUDD83A45","Crouxii_FRC0190","Csilva…	0.470948	0.253345	1.6812	0.460203	0.253632	1.68644	3074	2	1. 0.84913;2. 233;3. 697;4. 292;5. 292;6. 874;7. 359;8. 1075;9. 445;10. I;11. ATT	1. 0.51518;2. 415;3. 1243;4. 481;5. 481;6. 1441;7. 556;8. 1666;9. 880;10. K;11. AAA
ERS451417_01589	1717.62.peg.1598	NA	NA	NA	0.9427	4	Cdiphtheriae_NCTC11397,"Csilvaticum_KL0182","Culcerans_NCTC12077","Culcerans_NCTC7910"	0.520627	0.0820305	2.61649	0.415564	0.082128	2.61701	4098	43	1. 0.53716;2. 18;3. 52;4. 86;5. 19;6. 55;7. 22;8. 64;9. 4;10. S;11. TCT	1. 0.66416;2. 19;3. 55;4. 87;5. 20;6. 58;7. 23;8. 67;9. 7;10. S;11. TCT	1. 0.42435;2. 21;3. 61;4. 89;5. 22;6. 64;7. 25;8. 73;9. 13;10. S;11. TCC	1. 0.51911;2. 22;3. 64;4. 90;5. 23;6. 67;7. 26;8. 76;9. 16;10. C;11. TGC	1. 0.63142;2. 31;3. 91;4. 99;5. 32;6. 94;7. 35;8. 103;9. 43;10. E;11. GAA	1. 0.47659;2. 43;3. 127;4. 111;5. 44;6. 130;7. 47;8. 139;9. 79;10. R;11. CGG	1. 0.41882;2. 45;3. 133;4. 113;5. 46;6. 136;7. 49;8. 145;9. 85;10. M;11. ATG	1. 0.51609;2. 47;3. 139;4. 115;5. 48;6. 142;7. 51;8. 151;9. 91;10. H;11. CAC	1. 0.59284;2. 55;3. 163;4. 125;5. 56;6. 166;7. 59;8. 175;9. 115;10. E;11. GAA	1. 0.51924;2. 61;3. 181;4. 134;5. 62;6. 184;7. 65;8. 193;9. 133;10. L;11. CTC	1. 0.56229;2. 66;3. 196;4. 139;5. 67;6. 199;7. 70;8. 208;9. 148;10. V;11. GTC	1. 0.42223;2. 90;3. 268;4. 163;5. 91;6. 271;7. 94;8. 280;9. 160;10. Q;11. CAA	1. 0.69688;2. 96;3. 286;4. 169;5. 97;6. 289;7. 100;8. 298;9. 178;10. F;11. TTT	1. 0.40503;2. 97;3. 289;4. 170;5. 98;6. 292;7. 101;8. 301;9. 181;10. L;11. TTA	1. 0.53313;2. 98;3. 292;4. 171;5. 99;6. 295;7. 102;8. 304;9. 184;10. N;11. AAC	1. 0.59824;2. 100;3. 298;4. 173;5. 101;6. 301;7. 104;8. 310;9. 190;10. Q;11. CAG	1. 0.53937;2. 107;3. 319;4. 180;5. 108;6. 322;7. 111;8. 331;9. 211;10. S;11. TCT	1. 0.5033;2. 129;3. 385;4. 202;5. 130;6. 388;7. 133;8. 397;9. 277;10. V;11. GTT	1. 0.53378;2. 130;3. 388;4. 203;5. 131;6. 391;7. 134;8. 400;9. 280;10. N;11. AAT	1. 0.52496;2. 131;3. 391;4. 207;5. 132;6. 394;7. 135;8. 403;9. 283;10. D;11. GAT	1. 0.52202;2. 132;3. 394;4. 208;5. 133;6. 397;7. 136;8. 406;9. 286;10. S;11. TCT	1. 0.5963;2. 133;3. 397;4. 209;5. 134;6. 400;7. 137;8. 409;9. 289;10. G;11. GGA	1. 0.40481;2. 134;3. 400;4. 210;5. 135;6. 403;7. 138;8. 412;9. 292;10. S;11. TCG	1. 0.58082;2. 148;3. 442;4. 224;5. 149;6. 445;7. 152;8. 454;9. 334;10. P;11. CCG	1. 0.63263;2. 149;3. 445;4. 225;5. 150;6. 448;7. 153;8. 457;9. 337;10. Q;11. CAA	1. 0.61572;2. 171;3. 511;4. 247;5. 172;6. 514;7. 175;8. 523;9. 403;10. T;11. ACG	1. 0.63313;2. 223;3. 667;4. 471;5. 224;6. 670;7. 233;8. 697;9. 481;10. E;11. GAA	1. 0.55516;2. 227;3. 679;4. 475;5. 228;6. 682;7. 237;8. 709;9. 493;10. S;11. TCC	1. 0.62535;2. 229;3. 685;4. 477;5. 230;6. 688;7. 239;8. 715;9. 499;10. A;11. GCA	1. 0.62607;2. 231;3. 691;4. 479;5. 232;6. 694;7. 241;8. 721;9. 505;10. S;11. TCT	1. 0.58139;2. 238;3. 712;4. 487;5. 239;6. 715;7. 248;8. 742;9. 526;10. P;11. CCA	1. 0.44199;2. 239;3. 715;4. 488;5. 240;6. 718;7. 249;8. 745;9. 529;10. I;11. ATT	1. 0.51921;2. 249;3. 745;4. 498;5. 250;6. 748;7. 259;8. 775;9. 559;10. D;11. GAT	1. 0.68966;2. 258;3. 772;4. 510;5. 259;6. 775;7. 268;8. 802;9. 586;10. M;11. ATG
ERS451417_02124	1717.62.peg.2139	NA	NA	NA	0.9548	7	Cbelfantii_FRC0043,"Cdiphtheriae_NCTC11397","Cpseudotuberculosis_31","Cpseudotuberculosis_ATCC19410","Csilvaticum_KL0182","Culcerans_NCTC12077","Culcerans_NCTC7910"	0.0836116	0.0836116	3.12085	0.0847419	0.0835544	3.11388	2	1	1. 0.53424;2. 224;3. 670;4. 600;5. 253;6. 757;7. 253;8. 757;9. 619;10. E;11. GAG
ERS451417_01333	1717.62.peg.1341	NA	NA	NA	0.9564	38	Cargentoratense_DSM44202,"Catypicum_R2070","Caurimucosum_ATCC700975","Cbelfantii_FRC0043","Ccallunae_DSM20147","Ccamporealensis_DSM44610","Cdeserti_GIMN1010","Cdiphtheriae_NCTC11397","Cdoosanense_DSM45436","Cefficiens_YS314","Cepidermidicanis_DSM45586","Cfalsenii_DSM44353","Cglutamicum_ATCC13032","Cglycinophilum_AJ3170","Chalotolerans_YIM70093","Chumireducens_DSM45392","Cimitans_DSM44264","Cjeike…	0.162171	0.132844	1.79532	0.157813	0.132844	1.79532	1026	1	1. 0.78286;2. 301;3. 901;4. 348;5. 348;6. 1042;7. 484;8. 1450;9. 703;10. I;11. ATT
ERS451417_01263	1717.62.peg.1271	NA	NA	NA	0.9582	3	Cbelfantii_FRC0043,"Cdiphtheriae_NCTC11397","Crouxii_FRC0190"	0.321316	0.200715	5.82387	0.316085	0.200845	5.82164	130	3	1. 0.54851;2. 45;3. 133;4. 67;5. 45;6. 133;7. 45;8. 133;9. 112;10. R;11. CGG	1. 0.56197;2. 70;3. 208;4. 99;5. 70;6. 208;7. 70;8. 208;9. 187;10. G;11. GGT	1. 0.58491;2. 125;3. 373;4. 179;5. 125;6. 373;7. 125;8. 373;9. 352;10. S;11. TCT
ERS451417_00920	1717.62.peg.927	NA	NA	NA	0.9584	15	Caurimucosum_ATCC700975,"Cbelfantii_FRC0043","Ccallunae_DSM20147","Cdiphtheriae_NCTC11397","Cdoosanense_DSM45436","Cepidermidicanis_DSM45586","Cfalsenii_DSM44353","Cglutamicum_ATCC13032","Cjeikeium_K41","Cmarinum_DSM44953","Csimulans_PES1","Csingulare_IBSB52218","Cterpenotabidum_Y11","Ctestudinoris_DSM44614","Curealyticum_DSM7109"	0.216411	0.216411	1.57185	0.216653	0.216391	1.57072	2306	0
ERS451417_02266	1717.62.peg.2295	NA	NA	NA	0.96	8	Cbelfantii_FRC0043,"Cdiphtheriae_NCTC11397","Cdoosanense_DSM45436","Cglycinophilum_AJ3170","Clactis_RW25","CriegeliiPUDD83A45","Cuterequi_DSM45634","Cvitaeruminis_DSM20294"	8.14795	0.305997	1.51842	0.999856	0.306013	1.51834	256	0
ERS451417_02093	1717.62.peg.2107	NA	NA	NA	0.9637	3	Cdiphtheriae_NCTC11397,"Csimulans_PES1","Csingulare_IBSB52218"	1.00113	1		1	1		4480	0
ERS451417_02338	1717.62.peg.2365	NA	NA	NA	0.9638	5	Cbelfantii_FRC0043,"Cdiphtheriae_NCTC11397","Cepidermidicanis_DSM45586","Cimitans_DSM44264","Cuterequi_DSM45634"	0.423697	0.133668	1.66106	0.382841	0.133801	1.66105	2	3	1. 0.88782;2. 87;3. 259;4. 101;5. 97;6. 289;7. 118;8. 352;9. 118;10. Q;11. CAG	1. 0.61151;2. 453;3. 1357;4. 509;5. 464;6. 1390;7. 485;8. 1453;9. 1213;10. V;11. GTG	1. 0.43589;2. 469;3. 1405;4. 525;5. 480;6. 1438;7. 501;8. 1501;9. 1261;10. A;11. GCA
ERS451417_00215	1717.62.peg.212	NA	NA	NA	0.9761	11	Cbelfantii_FRC0043,"Ccallunae_DSM20147","Cdiphtheriae_NCTC11397","Ckutscheri_DSM20755","Cmustelae_DSM45274","Cpseudotuberculosis_ATCC19410","Crouxii_FRC0190","Csilvaticum_KL0182","Culcerans_NCTC12077","Culcerans_NCTC7910","Cvitaeruminis_DSM20294"	0.0761721	0.0761721	2.36404	0.0764616	0.0764616	2.36271	258	0
ERS451417_00744	1717.62.peg.747	NA	NA	NA	0.9762	3	Cbelfantii_FRC0043,"Cdiphtheriae_NCTC11397","Crouxii_FRC0190"	0.216623	0.191647	4.68803	0.215848	0.191665	4.68752	130	3	1. 0.41351;2. 76;3. 226;4. 123;5. 76;6. 226;7. 76;8. 226;9. 226;10. C;11. TGT	1. 0.41505;2. 281;3. 841;4. 336;5. 281;6. 841;7. 281;8. 841;9. 841;10. C;11. TGT	1. 0.41479;2. 462;3. 1384;4. 578;5. 462;6. 1384;7. 462;8. 1384;9. 1372;10. R;11. CGT
ERS451417_00363	1717.62.peg.362	NA	NA	NA	0.984	7	Caurimucosum_ATCC700975,"Cbelfantii_FRC0043","Cdiphtheriae_NCTC11397","Cepidermidicanis_DSM45586","Cimitans_DSM44264","Crouxii_FRC0190","Ctestudinoris_DSM44614"	0.140366	0.140366	2.20826	0.140714	0.140714	2.21444	3074	1	1. 0.54649;2. 36;3. 106;4. 108;5. 50;6. 148;7. 65;8. 193;9. 28;10. R;11. AGG
ERS451417_00960	1717.62.peg.967	NA	NA	NA	0.984	39	Cargentoratense_DSM44202,"Catypicum_R2070","Caurimucosum_ATCC700975","Cbelfantii_FRC0043","Ccallunae_DSM20147","Ccamporealensis_DSM44610","Cdeserti_GIMN1010","Cdiphtheriae_NCTC11397","Cdoosanense_DSM45436","Cefficiens_YS314","Cepidermidicanis_DSM45586","Cfalsenii_DSM44353","Cglutamicum_ATCC13032","Cglycinophilum_AJ3170","Chalotolerans_YIM70093","Chumireducens_DSM45392","Cimitans_DSM44264","Cjeike…	0.156421	0.156421	1.70632	0.156431	0.156421	1.70633	258	0
ERS451417_01341	1717.62.peg.1349	NA	NA	NA	0.9855	35	Cargentoratense_DSM44202,"Catypicum_R2070","Caurimucosum_ATCC700975","Cbelfantii_FRC0043","Ccallunae_DSM20147","Ccamporealensis_DSM44610","Cdeserti_GIMN1010","Cdiphtheriae_NCTC11397","Cdoosanense_DSM45436","Cefficiens_YS314","Cepidermidicanis_DSM45586","Cfalsenii_DSM44353","Cglutamicum_ATCC13032","Cglycinophilum_AJ3170","Chalotolerans_YIM70093","Chumireducens_DSM45392","Cimitans_DSM44264","Ckropp…	0.162101	0.160481	1.45544	0.318924	0.160481	1.45543	3330	0
ERS451417_01141	1717.62.peg.1152	NA	NA	NA	0.9857	39	Cargentoratense_DSM44202,"Catypicum_R2070","Caurimucosum_ATCC700975","Cbelfantii_FRC0043","Ccallunae_DSM20147","Ccamporealensis_DSM44610","Cdeserti_GIMN1010","Cdiphtheriae_NCTC11397","Cdoosanense_DSM45436","Cefficiens_YS314","Cepidermidicanis_DSM45586","Cfalsenii_DSM44353","Cglutamicum_ATCC13032","Cglycinophilum_AJ3170","Chalotolerans_YIM70093","Chumireducens_DSM45392","Cimitans_DSM44264","Cjeike…	0.0818391	0.0818391	2.0128	0.0818294	0.0818294	2.0128	258	0
ERS451417_00529	1717.62.peg.532	NA	NA	NA	0.9867	7	Cbelfantii_FRC0043,"Cdiphtheriae_NCTC11397","Cpseudotuberculosis_ATCC19410","Crouxii_FRC0190","Csilvaticum_KL0182","Culcerans_NCTC12077","Culcerans_NCTC7910"	0.289864	0.289835	3.25352	0.289844	0.289835	3.25353	2050	4	1. 0.53961;2. 204;3. 610;4. 292;5. 218;6. 652;7. 224;8. 670;9. 451;10. T;11. ACA	1. 0.46795;2. 273;3. 817;4. 383;5. 287;6. 859;7. 302;8. 904;9. 559;10. S;11. TCT	1. 0.40396;2. 282;3. 844;4. 410;5. 296;6. 886;7. 311;8. 931;9. 586;10. M;11. ATG	1. 0.43408;2. 322;3. 964;4. 536;5. 336;6. 1006;7. 351;8. 1051;9. 706;10. T;11. ACC
ERS451417_00606	1717.62.peg.610	NA	NA	NA	0.9872	4	Cbelfantii_FRC0043,"Cdiphtheriae_NCTC11397","Cepidermidicanis_DSM45586","Clactis_RW25"	0.220629	0.220629	2.47803	0.220615	0.220615	2.48175	2	2	1. 0.50678;2. 72;3. 214;4. 72;5. 72;6. 214;7. 72;8. 214;9. 190;10. N;11. AAC	1. 0.61154;2. 94;3. 280;4. 97;5. 95;6. 283;7. 95;8. 283;9. 253;10. I;11. ATA
ERS451417_01169	1717.62.peg.1180	NA	NA	NA	0.9874	39	Cargentoratense_DSM44202,"Catypicum_R2070","Caurimucosum_ATCC700975","Cbelfantii_FRC0043","Ccallunae_DSM20147","Ccamporealensis_DSM44610","Cdeserti_GIMN1010","Cdiphtheriae_NCTC11397","Cdoosanense_DSM45436","Cefficiens_YS314","Cepidermidicanis_DSM45586","Cfalsenii_DSM44353","Cglutamicum_ATCC13032","Cglycinophilum_AJ3170","Chalotolerans_YIM70093","Chumireducens_DSM45392","Cimitans_DSM44264","Cjeike…	0.184093	0.184093	1.52004	0.184093	0.184093	1.52004	2	1	1. 0.47994;2. 308;3. 922;4. 368;5. 368;6. 1102;7. 418;8. 1252;9. 886;10. D;11. GAT
ERS451417_00122	1717.62.peg.120	NA	NA	NA	0.9886	8	Cbelfantii_FRC0043,"Cdiphtheriae_NCTC11397","Cpseudotuberculosis_31","Cpseudotuberculosis_ATCC19410","Crouxii_FRC0190","Csilvaticum_KL0182","Culcerans_NCTC12077","Culcerans_NCTC7910"	1.04148	0.193223	3.87153	0.999682	0.193345	3.87154	2048	3	1. 0.44318;2. 101;3. 301;4. 169;5. 111;6. 331;7. 111;8. 331;9. 295;10. M;11. ATG	1. 0.84623;2. 118;3. 352;4. 188;5. 128;6. 382;7. 128;8. 382;9. 346;10. E;11. GAG	1. 0.9334;2. 147;3. 439;4. 244;5. 157;6. 469;7. 158;8. 472;9. 421;10. A;11. GCC
ERS451417_01548	1717.62.peg.1557	NA	NA	NA	0.9893	38	Cargentoratense_DSM44202,"Catypicum_R2070","Caurimucosum_ATCC700975","Cbelfantii_FRC0043","Ccallunae_DSM20147","Ccamporealensis_DSM44610","Cdeserti_GIMN1010","Cdiphtheriae_NCTC11397","Cdoosanense_DSM45436","Cefficiens_YS314","Cepidermidicanis_DSM45586","Cfalsenii_DSM44353","Cglutamicum_ATCC13032","Cglycinophilum_AJ3170","Chalotolerans_YIM70093","Chumireducens_DSM45392","Cimitans_DSM44264","Cjeike…	0.122713	0.122713	1.75103	0.122722	0.122713	1.75103	1282	0
ERS451417_00603	1717.62.peg.607	NA	NA	NA	0.9894	6	Cbelfantii_FRC0043,"Cdiphtheriae_NCTC11397","Cepidermidicanis_DSM45586","Clactis_RW25","Cmustelae_DSM45274","Cvitaeruminis_DSM20294"	0.377106	0.221353	2.28444	0.865805	0.221351	2.28368	258	0
ERS451417_02305	1717.62.peg.2332	NA	NA	NA	0.9908	34	Catypicum_R2070,"Caurimucosum_ATCC700975","Cbelfantii_FRC0043","Ccallunae_DSM20147","Ccamporealensis_DSM44610","Cdeserti_GIMN1010","Cdiphtheriae_NCTC11397","Cdoosanense_DSM45436","Cefficiens_YS314","Cepidermidicanis_DSM45586","Cfalsenii_DSM44353","Cglutamicum_ATCC13032","Cglycinophilum_AJ3170","Chalotolerans_YIM70093","Chumireducens_DSM45392","Cimitans_DSM44264","Cjeikeium_K41","Ckutscheri_DSM207…	0.279469	0.279431	1.9863	0.414358	0.279441	1.9863	2306	0
ERS451417_01437	1717.62.peg.1444	NA	NA	NA	0.9911	37	Cargentoratense_DSM44202,"Catypicum_R2070","Caurimucosum_ATCC700975","Cbelfantii_FRC0043","Ccallunae_DSM20147","Ccamporealensis_DSM44610","Cdeserti_GIMN1010","Cdiphtheriae_NCTC11397","Cdoosanense_DSM45436","Cefficiens_YS314","Cepidermidicanis_DSM45586","Cfalsenii_DSM44353","Cglutamicum_ATCC13032","Cglycinophilum_AJ3170","Chalotolerans_YIM70093","Chumireducens_DSM45392","Cimitans_DSM44264","Cjeike…	0.173916	0.173916	1.59377	0.173897	0.173897	1.59381	2	1	1. 0.49356;2. 182;3. 544;4. 207;5. 207;6. 619;7. 207;8. 619;9. 463;10. I;11. ATA
ERS451417_00204	1717.62.peg.201	NA	NA	NA	0.9916	4	Caurimucosum_ATCC700975,"Ccallunae_DSM20147","Cdiphtheriae_NCTC11397","Ckutscheri_DSM20755"	0.181121	0.181121	1.76422	0.181121	0.181121	1.76422	4098	4	1. 0.79705;2. 42;3. 124;4. 62;5. 62;6. 184;7. 76;8. 226;9. 82;10. S;11. AGC	1. 0.49159;2. 44;3. 130;4. 64;5. 64;6. 190;7. 78;8. 232;9. 88;10. M;11. ATG	1. 0.41985;2. 51;3. 151;4. 71;5. 71;6. 211;7. 85;8. 253;9. 109;10. K;11. AAA	1. 0.45622;2. 161;3. 481;4. 184;5. 184;6. 550;7. 199;8. 595;9. 421;10. N;11. AAC
ERS451417_01542	1717.62.peg.1551	NA	NA	NA	0.9916	38	Cargentoratense_DSM44202,"Catypicum_R2070","Caurimucosum_ATCC700975","Cbelfantii_FRC0043","Ccallunae_DSM20147","Ccamporealensis_DSM44610","Cdeserti_GIMN1010","Cdiphtheriae_NCTC11397","Cdoosanense_DSM45436","Cefficiens_YS314","Cepidermidicanis_DSM45586","Cfalsenii_DSM44353","Cglutamicum_ATCC13032","Cglycinophilum_AJ3170","Chalotolerans_YIM70093","Chumireducens_DSM45392","Cimitans_DSM44264","Cjeike…	0.203426	0.203322	2.16416	0.330767	0.203312	2.16416	258	0
ERS451417_01723	1717.62.peg.1726	NA	NA	NA	0.9923	38	Cargentoratense_DSM44202,"Catypicum_R2070","Caurimucosum_ATCC700975","Cbelfantii_FRC0043","Ccallunae_DSM20147","Ccamporealensis_DSM44610","Cdeserti_GIMN1010","Cdiphtheriae_NCTC11397","Cdoosanense_DSM45436","Cefficiens_YS314","Cepidermidicanis_DSM45586","Cfalsenii_DSM44353","Cglutamicum_ATCC13032","Cglycinophilum_AJ3170","Chalotolerans_YIM70093","Chumireducens_DSM45392","Cimitans_DSM44264","Cjeike…	0.127942	0.127942	1.83807	0.127942	0.127942	1.8381	258	0
ERS451417_00808	1717.62.peg.815	NA	NA	NA	0.9923	6	Caurimucosum_ATCC700975,"Cbelfantii_FRC0043","Cdeserti_GIMN1010","Cdiphtheriae_NCTC11397","Cepidermidicanis_DSM45586","Crouxii_FRC0190"	0.17219	0.17219	1.87505	0.17219	0.17219	1.87506	2	9	1. 0.43119;2. 49;3. 145;4. 58;5. 56;6. 166;7. 61;8. 181;9. 64;10. I;11. ATA	1. 0.53454;2. 58;3. 172;4. 67;5. 65;6. 193;7. 70;8. 208;9. 91;10. I;11. ATC	1. 0.40249;2. 112;3. 334;4. 134;5. 120;6. 358;7. 124;8. 370;9. 253;10. Q;11. CAG	1. 0.42425;2. 240;3. 718;4. 273;5. 248;6. 742;7. 254;8. 760;9. 610;10. G;11. GGG	1. 0.41257;2. 274;3. 820;4. 307;5. 282;6. 844;7. 288;8. 862;9. 712;10. S;11. TCT	1. 0.44319;2. 302;3. 904;4. 335;5. 310;6. 928;7. 316;8. 946;9. 796;10. H;11. CAT	1. 0.43397;2. 390;3. 1168;4. 451;5. 402;6. 1204;7. 418;8. 1252;9. 1009;10. H;11. CAC	1. 0.44493;2. 423;3. 1267;4. 526;5. 436;6. 1306;7. 451;8. 1351;9. 1093;10. S;11. TCT	1. 0.45327;2. 440;3. 1318;4. 543;5. 453;6. 1357;7. 468;8. 1402;9. 1144;10. K;11. AAA
ERS451417_00863	1717.62.peg.868	NA	NA	NA	0.9927	33	Cargentoratense_DSM44202,"Catypicum_R2070","Caurimucosum_ATCC700975","Cbelfantii_FRC0043","Ccallunae_DSM20147","Ccamporealensis_DSM44610","Cdeserti_GIMN1010","Cdiphtheriae_NCTC11397","Cdoosanense_DSM45436","Cefficiens_YS314","Cepidermidicanis_DSM45586","Cfalsenii_DSM44353","Cglutamicum_ATCC13032","Cglycinophilum_AJ3170","Chumireducens_DSM45392","Cimitans_DSM44264","Ckroppenstedtii_DSM44385","Ckut…	0.155654	0.155654	2.16708	0.155654	0.155654	2.16708	3330	0
ERS451417_00256	1717.62.peg.251	NA	NA	NA	0.9927	39	Cargentoratense_DSM44202,"Catypicum_R2070","Caurimucosum_ATCC700975","Cbelfantii_FRC0043","Ccallunae_DSM20147","Ccamporealensis_DSM44610","Cdeserti_GIMN1010","Cdiphtheriae_NCTC11397","Cdoosanense_DSM45436","Cefficiens_YS314","Cepidermidicanis_DSM45586","Cfalsenii_DSM44353","Cglutamicum_ATCC13032","Cglycinophilum_AJ3170","Chalotolerans_YIM70093","Chumireducens_DSM45392","Cimitans_DSM44264","Cjeike…	0.132014	0.132014	1.77325	0.132014	0.132014	1.77325	2	2	1. 0.62463;2. 141;3. 421;4. 188;5. 188;6. 562;7. 224;8. 670;9. 388;10. Q;11. CAA	1. 0.60828;2. 840;3. 2518;4. 933;5. 933;6. 2797;7. 1099;8. 3295;9. 2149;10. T;11. ACC
ERS451417_01893	1717.62.peg.1892	NA	NA	NA	0.993	38	Cargentoratense_DSM44202,"Catypicum_R2070","Caurimucosum_ATCC700975","Cbelfantii_FRC0043","Ccallunae_DSM20147","Ccamporealensis_DSM44610","Cdeserti_GIMN1010","Cdiphtheriae_NCTC11397","Cdoosanense_DSM45436","Cefficiens_YS314","Cepidermidicanis_DSM45586","Cfalsenii_DSM44353","Cglutamicum_ATCC13032","Cglycinophilum_AJ3170","Chalotolerans_YIM70093","Chumireducens_DSM45392","Cimitans_DSM44264","Cjeike…	0.100403	0.100403	2.22323	0.100403	0.100403	2.22322	2306	0
ERS451417_00326	1717.62.peg.328	NA	NA	NA	0.9935	39	Cargentoratense_DSM44202,"Catypicum_R2070","Caurimucosum_ATCC700975","Cbelfantii_FRC0043","Ccallunae_DSM20147","Ccamporealensis_DSM44610","Cdeserti_GIMN1010","Cdiphtheriae_NCTC11397","Cdoosanense_DSM45436","Cefficiens_YS314","Cepidermidicanis_DSM45586","Cfalsenii_DSM44353","Cglutamicum_ATCC13032","Cglycinophilum_AJ3170","Chalotolerans_YIM70093","Chumireducens_DSM45392","Cimitans_DSM44264","Cjeike…	0.243854	0.207119	1.67492	0.243256	0.207119	1.67492	1026	1	1. 0.75033;2. 120;3. 358;4. 149;5. 149;6. 445;7. 320;8. 958;9. 298;10. T;11. ACG
ERS451417_00282	1717.62.peg.283	NA	NA	NA	0.994	24	Caurimucosum_ATCC700975,"Cbelfantii_FRC0043","Ccamporealensis_DSM44610","Cdiphtheriae_NCTC11397","Cdoosanense_DSM45436","Cfalsenii_DSM44353","Chalotolerans_YIM70093","Chumireducens_DSM45392","Cimitans_DSM44264","Cmarinum_DSM44953","Cmaris_DSM45190","Cmustelae_DSM45274","Cpseudotuberculosis_31","Cpseudotuberculosis_ATCC19410","CriegeliiPUDD83A45","Csilvaticum_KL0182","Csimulans_PES1","Csingulare_I…	0.157683	0.157683	1.63814	0.157702	0.157683	1.63814	3074	2	1. 0.54726;2. 63;3. 187;4. 82;5. 80;6. 238;7. 154;8. 460;9. 58;10. N;11. AAC	1. 0.41721;2. 272;3. 814;4. 312;5. 307;6. 919;7. 460;8. 1378;9. 520;10. V;11. GTC
ERS451417_01597	1717.62.peg.1606	NA	NA	NA	0.9944	19	Cargentoratense_DSM44202,"Cbelfantii_FRC0043","Ccallunae_DSM20147","Cdeserti_GIMN1010","Cdiphtheriae_NCTC11397","Cefficiens_YS314","Cepidermidicanis_DSM45586","Cglutamicum_ATCC13032","Chalotolerans_YIM70093","Chumireducens_DSM45392","Ckutscheri_DSM20755","Cmarinum_DSM44953","Cpseudotuberculosis_31","Cpseudotuberculosis_ATCC19410","Csilvaticum_KL0182","Ctestudinoris_DSM44614","Culcerans_NCTC12077"…	111.529	0.271077	2.14993	0.979052	0.271067	2.14993	1280	0
ERS451417_01649	1717.62.peg.1656	NA	NA	NA	0.9945	37	Cargentoratense_DSM44202,"Catypicum_R2070","Caurimucosum_ATCC700975","Cbelfantii_FRC0043","Ccallunae_DSM20147","Ccamporealensis_DSM44610","Cdeserti_GIMN1010","Cdiphtheriae_NCTC11397","Cdoosanense_DSM45436","Cefficiens_YS314","Cepidermidicanis_DSM45586","Cfalsenii_DSM44353","Cglutamicum_ATCC13032","Cglycinophilum_AJ3170","Chalotolerans_YIM70093","Chumireducens_DSM45392","Cimitans_DSM44264","Cjeike…	0.191621	0.191621	1.76432	0.191621	0.191621	1.76432	258	0
ERS451417_01327	1717.62.peg.1335	NA	NA	NA	0.9945	38	Cargentoratense_DSM44202,"Catypicum_R2070","Caurimucosum_ATCC700975","Cbelfantii_FRC0043","Ccallunae_DSM20147","Ccamporealensis_DSM44610","Cdeserti_GIMN1010","Cdiphtheriae_NCTC11397","Cdoosanense_DSM45436","Cefficiens_YS314","Cepidermidicanis_DSM45586","Cfalsenii_DSM44353","Cglutamicum_ATCC13032","Cglycinophilum_AJ3170","Chalotolerans_YIM70093","Chumireducens_DSM45392","Cimitans_DSM44264","Cjeike…	0.155318	0.155308	2.18532	0.274923	0.155308	2.18532	1282	0
ERS451417_01079	1717.62.peg.1091	NA	NA	NA	0.9947	3	Cdiphtheriae_NCTC11397,"Cmustelae_DSM45274","Cvitaeruminis_DSM20294"	0.905389	0.169412	1.22084	0.302174	0.169402	1.22076	4480	0
ERS451417_01143	1717.62.peg.1154	NA	NA	NA	0.9948	12	Caurimucosum_ATCC700975,"Cbelfantii_FRC0043","Ccamporealensis_DSM44610","Cdiphtheriae_NCTC11397","Cepidermidicanis_DSM45586","Cglycinophilum_AJ3170","Cimitans_DSM44264","Crouxii_FRC0190","Csimulans_PES1","Csingulare_IBSB52218","Ctestudinoris_DSM44614","Cvitaeruminis_DSM20294"	0.211843	0.211843	2.16702	0.211843	0.211843	2.16702	2050	2	1. 0.62298;2. 17;3. 49;4. 32;5. 17;6. 49;7. 17;8. 49;9. 46;10. D;11. GAC	1. 0.63561;2. 145;3. 433;4. 174;5. 159;6. 475;7. 199;8. 595;9. 292;10. H;11. CAT
ERS451417_00065	1717.62.peg.61	NA	NA	NA	0.9948	4	Cbelfantii_FRC0043,"Cdiphtheriae_NCTC11397","Crouxii_FRC0190","Csimulans_PES1"	0.431384	0.431384	4.89246	0.431374	0.431374	4.89222	2	3	1. 0.64227;2. 50;3. 148;4. 52;5. 50;6. 148;7. 50;8. 148;9. 73;10. V;11. GTC	1. 0.63617;2. 115;3. 343;4. 118;5. 115;6. 343;7. 115;8. 343;9. 268;10. I;11. ATC	1. 0.59802;2. 304;3. 910;4. 338;5. 305;6. 913;7. 310;8. 928;9. 787;10. R;11. CGC
ERS451417_00129	1717.62.peg.127	NA	NA	NA	0.9951	39	Cargentoratense_DSM44202,"Catypicum_R2070","Caurimucosum_ATCC700975","Cbelfantii_FRC0043","Ccallunae_DSM20147","Ccamporealensis_DSM44610","Cdeserti_GIMN1010","Cdiphtheriae_NCTC11397","Cdoosanense_DSM45436","Cefficiens_YS314","Cepidermidicanis_DSM45586","Cfalsenii_DSM44353","Cglutamicum_ATCC13032","Cglycinophilum_AJ3170","Chalotolerans_YIM70093","Chumireducens_DSM45392","Cimitans_DSM44264","Cjeike…	0.0977509	0.0977509	1.95402	0.0977506	0.0977506	1.95403	258	0
ERS451417_00570	1717.62.peg.573	NA	NA	NA	0.9952	7	Cbelfantii_FRC0043,"Cdiphtheriae_NCTC11397","Cpseudotuberculosis_31","Cpseudotuberculosis_ATCC19410","Crouxii_FRC0190","Csilvaticum_KL0182","Culcerans_NCTC7910"	0.237443	0.237443	2.59376	0.237434	0.237434	2.59343	2	1	1. 0.42929;2. 61;3. 181;4. 155;5. 61;6. 181;7. 61;8. 181;9. 181;10. E;11. GAG
ERS451417_00971	1717.62.peg.979	NA	NA	NA	0.9955	14	Cbelfantii_FRC0043,"Cdeserti_GIMN1010","Cdiphtheriae_NCTC11397","Cepidermidicanis_DSM45586","Cglutamicum_ATCC13032","Ckutscheri_DSM20755","Clactis_RW25","Cpseudotuberculosis_31","Cpseudotuberculosis_ATCC19410","Crouxii_FRC0190","Csilvaticum_KL0182","Ctestudinoris_DSM44614","Culcerans_NCTC12077","Culcerans_NCTC7910"	0.14914	0.14914	2.76726	0.14914	0.14914	2.76726	2	2	1. 0.41255;2. 59;3. 175;4. 72;5. 62;6. 184;7. 133;8. 397;9. 34;10. Q;11. CAA	1. 0.4092;2. 87;3. 259;4. 100;5. 90;6. 268;7. 161;8. 481;9. 118;10. T;11. ACA
ERS451417_00284	1717.62.peg.285	NA	NA	NA	0.9955	39	Cargentoratense_DSM44202,"Catypicum_R2070","Caurimucosum_ATCC700975","Cbelfantii_FRC0043","Ccallunae_DSM20147","Ccamporealensis_DSM44610","Cdeserti_GIMN1010","Cdiphtheriae_NCTC11397","Cdoosanense_DSM45436","Cefficiens_YS314","Cepidermidicanis_DSM45586","Cfalsenii_DSM44353","Cglutamicum_ATCC13032","Cglycinophilum_AJ3170","Chalotolerans_YIM70093","Chumireducens_DSM45392","Cimitans_DSM44264","Cjeike…	0.209561	0.209542	1.85161	0.218057	0.209542	1.85162	258	0
ERS451417_02259	1717.62.peg.2288	NA	NA	NA	0.9955	14	Caurimucosum_ATCC700975,"Cbelfantii_FRC0043","Ccamporealensis_DSM44610","Cdiphtheriae_NCTC11397","Ckroppenstedtii_DSM44385","Clactis_RW25","Cmustelae_DSM45274","Cpseudotuberculosis_31","Cpseudotuberculosis_ATCC19410","Csilvaticum_KL0182","Csimulans_PES1","Csingulare_IBSB52218","Culcerans_NCTC12077","Culcerans_NCTC7910"	0.151306	0.151036	2.51315	0.154881	0.151046	2.51315	258	0
ERS451417_01420	1717.62.peg.1426	NA	NA	NA	0.9956	36	Cargentoratense_DSM44202,"Catypicum_R2070","Caurimucosum_ATCC700975","Cbelfantii_FRC0043","Ccallunae_DSM20147","Ccamporealensis_DSM44610","Cdeserti_GIMN1010","Cdiphtheriae_NCTC11397","Cdoosanense_DSM45436","Cefficiens_YS314","Cepidermidicanis_DSM45586","Cfalsenii_DSM44353","Cglutamicum_ATCC13032","Cglycinophilum_AJ3170","Chalotolerans_YIM70093","Chumireducens_DSM45392","Cimitans_DSM44264","Cjeike…	0.157748	0.157748	1.68559	0.157748	0.157748	1.68559	3074	1	1. 0.74163;2. 171;3. 511;4. 187;5. 187;6. 559;7. 201;8. 601;9. 436;10. V;11. GTG
ERS451417_02267	1717.62.peg.2296	NA	NA	NA	0.9958	11	Cbelfantii_FRC0043,"Cdiphtheriae_NCTC11397","Cepidermidicanis_DSM45586","Ckutscheri_DSM20755","Cpseudotuberculosis_31","Cpseudotuberculosis_ATCC19410","Csilvaticum_KL0182","Ctestudinoris_DSM44614","Culcerans_NCTC12077","Culcerans_NCTC7910","Cvitaeruminis_DSM20294"	0.242008	0.241501	2.23914	0.25347	0.241511	2.23914	258	0
ERS451417_02341	1717.62.peg.2368	NA	NA	NA	0.9964	6	Cdiphtheriae_NCTC11397,"Cefficiens_YS314","Cepidermidicanis_DSM45586","Clactis_RW25","Curealyticum_DSM7109","Cvitaeruminis_DSM20294"	0.155319	0.155319	2.17165	0.155319	0.155319	2.17165	4098	2	1. 0.80955;2. 344;3. 1030;4. 410;5. 346;6. 1036;7. 354;8. 1060;9. 949;10. D;11. GAT	1. 0.88208;2. 443;3. 1327;4. 525;5. 445;6. 1333;7. 453;8. 1357;9. 1246;10. A;11. GCC
ERS451417_00627	1717.62.peg.631	NA	NA	NA	0.9966	27	Cargentoratense_DSM44202,"Catypicum_R2070","Cbelfantii_FRC0043","Ccallunae_DSM20147","Cdeserti_GIMN1010","Cdiphtheriae_NCTC11397","Cdoosanense_DSM45436","Cefficiens_YS314","Cfalsenii_DSM44353","Cglutamicum_ATCC13032","Cglycinophilum_AJ3170","Chalotolerans_YIM70093","Cjeikeium_K41","Ckutscheri_DSM20755","Clactis_RW25","Cmaris_DSM45190","Cmustelae_DSM45274","Cpseudotuberculosis_31","Cpseudotubercul…	0.147485	0.147485	1.66684	0.147485	0.147485	1.66684	258	0
ERS451417_01745	1717.62.peg.1748	NA	NA	NA	0.9966	33	Cargentoratense_DSM44202,"Caurimucosum_ATCC700975","Cbelfantii_FRC0043","Ccallunae_DSM20147","Cdeserti_GIMN1010","Cdiphtheriae_NCTC11397","Cefficiens_YS314","Cepidermidicanis_DSM45586","Cfalsenii_DSM44353","Cglutamicum_ATCC13032","Cglycinophilum_AJ3170","Chalotolerans_YIM70093","Chumireducens_DSM45392","Cimitans_DSM44264","Cjeikeium_K41","Ckutscheri_DSM20755","Clactis_RW25","Cmarinum_DSM44953","C…	0.1734	0.1734	1.41783	0.1734	0.1734	1.41783	3074	1	1. 0.4523;2. 59;3. 175;4. 95;5. 95;6. 283;7. 116;8. 346;9. 103;10. E;11. GAG
ERS451417_02031	1717.62.peg.2036	NA	NA	NA	0.9968	19	Caurimucosum_ATCC700975,"Cbelfantii_FRC0043","Ccamporealensis_DSM44610","Cdiphtheriae_NCTC11397","Cdoosanense_DSM45436","Chalotolerans_YIM70093","Chumireducens_DSM45392","Cimitans_DSM44264","Cmarinum_DSM44953","Cpseudotuberculosis_31","Cpseudotuberculosis_ATCC19410","CriegeliiPUDD83A45","Csilvaticum_KL0182","Csimulans_PES1","Csingulare_IBSB52218","Ctestudinoris_DSM44614","Culcerans_NCTC12077","Cu…	0.229918	0.22989	1.92706	0.236996	0.22989	1.92708	3330	0
ERS451417_01520	1717.62.peg.1529	NA	NA	NA	0.9968	15	Cargentoratense_DSM44202,"Cbelfantii_FRC0043","Cdiphtheriae_NCTC11397","Cefficiens_YS314","Cepidermidicanis_DSM45586","Ckroppenstedtii_DSM44385","Ckutscheri_DSM20755","Clactis_RW25","Cmustelae_DSM45274","Cpseudotuberculosis_31","Cpseudotuberculosis_ATCC19410","Csilvaticum_KL0182","Culcerans_NCTC12077","Culcerans_NCTC7910","Cvitaeruminis_DSM20294"	1	0.210581	2.23598	0.999904	0.210581	2.2359	3072	1	1. 0.90984;2. 115;3. 343;4. 162;5. 162;6. 484;7. 172;8. 514;9. 190;10. S;11. TCC
ERS451417_01459	1717.62.peg.1469	NA	NA	NA	0.997	30	Caurimucosum_ATCC700975,"Ccallunae_DSM20147","Ccamporealensis_DSM44610","Cdeserti_GIMN1010","Cdiphtheriae_NCTC11397","Cdoosanense_DSM45436","Cefficiens_YS314","Cepidermidicanis_DSM45586","Cfalsenii_DSM44353","Cglutamicum_ATCC13032","Cglycinophilum_AJ3170","Chalotolerans_YIM70093","Chumireducens_DSM45392","Cimitans_DSM44264","Ckroppenstedtii_DSM44385","Ckutscheri_DSM20755","Clactis_RW25","Cmarinum…	0.1731	0.1731	1.78302	0.1731	0.1731	1.78301	4354	0
ERS451417_00517	1717.62.peg.521	NA	NA	NA	0.997	9	Cbelfantii_FRC0043,"Cdiphtheriae_NCTC11397","Cjeikeium_K41","Clactis_RW25","Cpseudotuberculosis_31","Cpseudotuberculosis_ATCC19410","Csilvaticum_KL0182","Culcerans_NCTC12077","Culcerans_NCTC7910"	0.13225	0.13225	2.59036	0.138942	0.132251	2.59035	258	0
ERS451417_00173	1717.62.peg.171	NA	NA	NA	0.9972	23	Catypicum_R2070,"Caurimucosum_ATCC700975","Cbelfantii_FRC0043","Ccallunae_DSM20147","Cdeserti_GIMN1010","Cdiphtheriae_NCTC11397","Cdoosanense_DSM45436","Cefficiens_YS314","Cepidermidicanis_DSM45586","Cfalsenii_DSM44353","Cglutamicum_ATCC13032","Chalotolerans_YIM70093","Ckroppenstedtii_DSM44385","Ckutscheri_DSM20755","Cmarinum_DSM44953","Cmaris_DSM45190","Cpseudotuberculosis_31","Cpseudotuberculos…	0.328606	0.327748	1.54899	0.339916	0.327739	1.54899	3330	0
ERS451417_02138	1717.62.peg.2158	NA	NA	NA	0.9972	6	Cbelfantii_FRC0043,"Cdiphtheriae_NCTC11397","Cpseudotuberculosis_31","Cpseudotuberculosis_ATCC19410","Culcerans_NCTC12077","Culcerans_NCTC7910"	0.232495	0.232495	2.62806	0.232495	0.232495	2.62806	2	1	1. 0.79414;2. 258;3. 772;4. 489;5. 259;6. 775;7. 261;8. 781;9. 754;10. R;11. CGA
ERS451417_02034	1717.62.peg.2039	NA	NA	NA	0.9972	38	Cargentoratense_DSM44202,"Catypicum_R2070","Caurimucosum_ATCC700975","Cbelfantii_FRC0043","Ccallunae_DSM20147","Ccamporealensis_DSM44610","Cdeserti_GIMN1010","Cdiphtheriae_NCTC11397","Cdoosanense_DSM45436","Cefficiens_YS314","Cepidermidicanis_DSM45586","Cfalsenii_DSM44353","Cglutamicum_ATCC13032","Cglycinophilum_AJ3170","Chalotolerans_YIM70093","Chumireducens_DSM45392","Cimitans_DSM44264","Cjeike…	0.0958951	0.0958951	1.99081	0.0958951	0.0958951	1.99081	258	0
ERS451417_00949	1717.62.peg.956	NA	NA	NA	0.9972	3	Cbelfantii_FRC0043,"Cdiphtheriae_NCTC11397","Crouxii_FRC0190"	1.22099	1	3.84007	1	1	3.84005	384	0
ERS451417_01654	1717.62.peg.1661	NA	NA	NA	0.9975	38	Cargentoratense_DSM44202,"Catypicum_R2070","Caurimucosum_ATCC700975","Cbelfantii_FRC0043","Ccallunae_DSM20147","Ccamporealensis_DSM44610","Cdeserti_GIMN1010","Cdiphtheriae_NCTC11397","Cdoosanense_DSM45436","Cefficiens_YS314","Cepidermidicanis_DSM45586","Cfalsenii_DSM44353","Cglutamicum_ATCC13032","Cglycinophilum_AJ3170","Chalotolerans_YIM70093","Chumireducens_DSM45392","Cimitans_DSM44264","Cjeike…	0.137614	0.137614	1.73596	0.137604	0.137604	1.73597	2	1	1. 0.6617;2. 91;3. 271;4. 91;5. 91;6. 271;7. 91;8. 271;9. 187;10. K;11. AAA
ERS451417_01722	1717.62.peg.1725	NA	NA	NA	0.9975	10	Cbelfantii_FRC0043,"Cdiphtheriae_NCTC11397","Ckutscheri_DSM20755","Cmustelae_DSM45274","Cpseudotuberculosis_31","Cpseudotuberculosis_ATCC19410","Csilvaticum_KL0182","Culcerans_NCTC12077","Culcerans_NCTC7910","Cvitaeruminis_DSM20294"	0.18654	0.18654	2.42749	0.193304	0.18654	2.42749	2306	0
ERS451417_00675	1717.62.peg.682	NA	NA	NA	0.9975	37	Cargentoratense_DSM44202,"Catypicum_R2070","Caurimucosum_ATCC700975","Cbelfantii_FRC0043","Ccallunae_DSM20147","Ccamporealensis_DSM44610","Cdeserti_GIMN1010","Cdiphtheriae_NCTC11397","Cdoosanense_DSM45436","Cefficiens_YS314","Cepidermidicanis_DSM45586","Cfalsenii_DSM44353","Cglutamicum_ATCC13032","Cglycinophilum_AJ3170","Chalotolerans_YIM70093","Chumireducens_DSM45392","Cimitans_DSM44264","Cjeike…	0.185894	0.185894	1.66502	0.185894	0.185894	1.66502	3330	0
ERS451417_01891	1717.62.peg.1890	NA	NA	NA	0.9977	38	Cargentoratense_DSM44202,"Catypicum_R2070","Caurimucosum_ATCC700975","Cbelfantii_FRC0043","Ccallunae_DSM20147","Ccamporealensis_DSM44610","Cdeserti_GIMN1010","Cdiphtheriae_NCTC11397","Cdoosanense_DSM45436","Cefficiens_YS314","Cepidermidicanis_DSM45586","Cfalsenii_DSM44353","Cglutamicum_ATCC13032","Cglycinophilum_AJ3170","Chalotolerans_YIM70093","Chumireducens_DSM45392","Cimitans_DSM44264","Cjeike…	0.164415	0.164415	2.04441	0.164415	0.164415	2.04441	2	1	1. 0.55797;2. 104;3. 310;4. 108;5. 108;6. 322;7. 118;8. 352;9. 118;10. S;11. TCG
ERS451417_02315	1717.62.peg.2342	NA	NA	NA	0.9977	38	Cargentoratense_DSM44202,"Catypicum_R2070","Caurimucosum_ATCC700975","Cbelfantii_FRC0043","Ccallunae_DSM20147","Ccamporealensis_DSM44610","Cdeserti_GIMN1010","Cdiphtheriae_NCTC11397","Cdoosanense_DSM45436","Cefficiens_YS314","Cepidermidicanis_DSM45586","Cfalsenii_DSM44353","Cglutamicum_ATCC13032","Cglycinophilum_AJ3170","Chalotolerans_YIM70093","Chumireducens_DSM45392","Cimitans_DSM44264","Cjeike…	0.711564	0.260942	1.86711	0.383168	0.260942	1.86711	258	0
ERS451417_00753	1717.62.peg.758	NA	NA	NA	0.9977	39	Cargentoratense_DSM44202,"Catypicum_R2070","Caurimucosum_ATCC700975","Cbelfantii_FRC0043","Ccallunae_DSM20147","Ccamporealensis_DSM44610","Cdeserti_GIMN1010","Cdiphtheriae_NCTC11397","Cdoosanense_DSM45436","Cefficiens_YS314","Cepidermidicanis_DSM45586","Cfalsenii_DSM44353","Cglutamicum_ATCC13032","Cglycinophilum_AJ3170","Chalotolerans_YIM70093","Chumireducens_DSM45392","Cimitans_DSM44264","Cjeike…	0.10568	0.10568	2.60467	0.10568	0.10568	2.60469	258	0
ERS451417_02276	1717.62.peg.2305	NA	NA	NA	0.998	23	Catypicum_R2070,"Caurimucosum_ATCC700975","Cbelfantii_FRC0043","Ccallunae_DSM20147","Ccamporealensis_DSM44610","Cdeserti_GIMN1010","Cdiphtheriae_NCTC11397","Cdoosanense_DSM45436","Cglutamicum_ATCC13032","Chalotolerans_YIM70093","Chumireducens_DSM45392","Cmarinum_DSM44953","Cmaris_DSM45190","Cmustelae_DSM45274","Cpseudotuberculosis_31","Cpseudotuberculosis_ATCC19410","Csilvaticum_KL0182","Csimulan…	0.174239	0.17423	1.56583	0.177957	0.17423	1.56583	3330	0
ERS451417_00372	1717.62.peg.371	NA	NA	NA	0.998	5	Cdiphtheriae_NCTC11397,"Cpseudotuberculosis_ATCC19410","Crouxii_FRC0190","Csilvaticum_KL0182","Culcerans_NCTC12077"	0.177442	0.177394	2.4718	0.180823	0.177394	2.4718	4354	0
ERS451417_00661	1717.62.peg.665	NA	NA	NA	0.998	36	Catypicum_R2070,"Caurimucosum_ATCC700975","Cbelfantii_FRC0043","Ccallunae_DSM20147","Ccamporealensis_DSM44610","Cdeserti_GIMN1010","Cdiphtheriae_NCTC11397","Cdoosanense_DSM45436","Cefficiens_YS314","Cepidermidicanis_DSM45586","Cfalsenii_DSM44353","Cglutamicum_ATCC13032","Chalotolerans_YIM70093","Chumireducens_DSM45392","Cimitans_DSM44264","Cjeikeium_K41","Ckroppenstedtii_DSM44385","Ckutscheri_DSM…	0.248735	0.248735	1.556	0.248735	0.248735	1.55601	3074	1	1. 0.67111;2. 263;3. 787;4. 322;5. 317;6. 949;7. 377;8. 1129;9. 520;10. D;11. GAT
ERS451417_01627	1717.62.peg.1635	NA	NA	NA	0.998	5	Cbelfantii_FRC0043,"Cdiphtheriae_NCTC11397","Cpseudotuberculosis_ATCC19410","Csilvaticum_KL0182","Culcerans_NCTC7910"	0.14649	0.135674	4.19128	0.149949	0.135683	4.19128	258	0
ERS451417_00794	1717.62.peg.800	NA	NA	NA	0.998	36	Cargentoratense_DSM44202,"Caurimucosum_ATCC700975","Cbelfantii_FRC0043","Ccallunae_DSM20147","Ccamporealensis_DSM44610","Cdeserti_GIMN1010","Cdiphtheriae_NCTC11397","Cdoosanense_DSM45436","Cefficiens_YS314","Cepidermidicanis_DSM45586","Cfalsenii_DSM44353","Cglutamicum_ATCC13032","Cglycinophilum_AJ3170","Chalotolerans_YIM70093","Chumireducens_DSM45392","Cimitans_DSM44264","Cjeikeium_K41","Ckutsche…	0.152989	0.152989	1.99375	0.152989	0.152989	1.99375	2	1	1. 0.56781;2. 190;3. 568;4. 299;5. 299;6. 895;7. 338;8. 1012;9. 424;10. I;11. ATC
ERS451417_00964	1717.62.peg.971	NA	NA	NA	0.998	8	Cbelfantii_FRC0043,"Cdiphtheriae_NCTC11397","Cpseudotuberculosis_31","Cpseudotuberculosis_ATCC19410","Crouxii_FRC0190","Csilvaticum_KL0182","Culcerans_NCTC12077","Culcerans_NCTC7910"	0.379942	0.03616	2.57496	0.379942	0.03616	2.57497	2	4	1. 0.81142;2. 30;3. 88;4. 42;5. 39;6. 115;7. 39;8. 115;9. 82;10. C;11. TGT	1. 0.7843;2. 98;3. 292;4. 110;5. 107;6. 319;7. 107;8. 319;9. 286;10. H;11. CAT	1. 0.75596;2. 112;3. 334;4. 125;5. 121;6. 361;7. 121;8. 361;9. 328;10. E;11. GAA	1. 0.80822;2. 151;3. 451;4. 178;5. 160;6. 478;7. 160;8. 478;9. 445;10. Q;11. CAG
ERS451417_00231	1717.62.peg.227	NA	NA	NA	0.998	39	Cargentoratense_DSM44202,"Catypicum_R2070","Caurimucosum_ATCC700975","Cbelfantii_FRC0043","Ccallunae_DSM20147","Ccamporealensis_DSM44610","Cdeserti_GIMN1010","Cdiphtheriae_NCTC11397","Cdoosanense_DSM45436","Cefficiens_YS314","Cepidermidicanis_DSM45586","Cfalsenii_DSM44353","Cglutamicum_ATCC13032","Cglycinophilum_AJ3170","Chalotolerans_YIM70093","Chumireducens_DSM45392","Cimitans_DSM44264","Cjeike…	0.089889	0.089889	2.10483	0.089889	0.089889	2.10483	2	1	1. 0.48436;2. 28;3. 82;4. 28;5. 28;6. 82;7. 28;8. 82;9. 79;10. D;11. GAT
ERS451417_02057	1717.62.peg.2069	NA	NA	NA	0.998	38	Cargentoratense_DSM44202,"Catypicum_R2070","Caurimucosum_ATCC700975","Cbelfantii_FRC0043","Ccallunae_DSM20147","Ccamporealensis_DSM44610","Cdeserti_GIMN1010","Cdiphtheriae_NCTC11397","Cdoosanense_DSM45436","Cefficiens_YS314","Cepidermidicanis_DSM45586","Cfalsenii_DSM44353","Cglutamicum_ATCC13032","Cglycinophilum_AJ3170","Chalotolerans_YIM70093","Chumireducens_DSM45392","Cimitans_DSM44264","Cjeike…	0.192135	0.192135	1.73832	0.192135	0.192135	1.73832	258	0
ERS451417_01249	1717.62.peg.1257	NA	NA	NA	0.998	39	Cargentoratense_DSM44202,"Catypicum_R2070","Caurimucosum_ATCC700975","Cbelfantii_FRC0043","Ccallunae_DSM20147","Ccamporealensis_DSM44610","Cdeserti_GIMN1010","Cdiphtheriae_NCTC11397","Cdoosanense_DSM45436","Cefficiens_YS314","Cepidermidicanis_DSM45586","Cfalsenii_DSM44353","Cglutamicum_ATCC13032","Cglycinophilum_AJ3170","Chalotolerans_YIM70093","Chumireducens_DSM45392","Cimitans_DSM44264","Cjeike…	0.13802	0.13802	1.78102	0.13802	0.13802	1.78102	258	0
ERS451417_00005	1717.62.peg.6	NA	NA	NA	0.9984	39	Cargentoratense_DSM44202,"Catypicum_R2070","Caurimucosum_ATCC700975","Cbelfantii_FRC0043","Ccallunae_DSM20147","Ccamporealensis_DSM44610","Cdeserti_GIMN1010","Cdiphtheriae_NCTC11397","Cdoosanense_DSM45436","Cefficiens_YS314","Cepidermidicanis_DSM45586","Cfalsenii_DSM44353","Cglutamicum_ATCC13032","Cglycinophilum_AJ3170","Chalotolerans_YIM70093","Chumireducens_DSM45392","Cimitans_DSM44264","Cjeike…	0.122071	0.122071	1.93327	0.122071	0.122071	1.93328	258	0
ERS451417_01575	1717.62.peg.1584	NA	NA	NA	0.9984	38	Cargentoratense_DSM44202,"Catypicum_R2070","Caurimucosum_ATCC700975","Cbelfantii_FRC0043","Ccallunae_DSM20147","Ccamporealensis_DSM44610","Cdeserti_GIMN1010","Cdiphtheriae_NCTC11397","Cdoosanense_DSM45436","Cefficiens_YS314","Cepidermidicanis_DSM45586","Cfalsenii_DSM44353","Cglutamicum_ATCC13032","Cglycinophilum_AJ3170","Chalotolerans_YIM70093","Chumireducens_DSM45392","Cimitans_DSM44264","Cjeike…	0.130402	0.130402	1.83648	0.130402	0.130402	1.83645	258	0
ERS451417_00818	1717.62.peg.824	NA	NA	NA	0.9984	39	Cargentoratense_DSM44202,"Catypicum_R2070","Caurimucosum_ATCC700975","Cbelfantii_FRC0043","Ccallunae_DSM20147","Ccamporealensis_DSM44610","Cdeserti_GIMN1010","Cdiphtheriae_NCTC11397","Cdoosanense_DSM45436","Cefficiens_YS314","Cepidermidicanis_DSM45586","Cfalsenii_DSM44353","Cglutamicum_ATCC13032","Cglycinophilum_AJ3170","Chalotolerans_YIM70093","Chumireducens_DSM45392","Cimitans_DSM44264","Cjeike…	0.20858	0.20858	1.88025	0.20858	0.20858	1.88025	2	1	1. 0.66257;2. 236;3. 706;4. 259;5. 259;6. 775;7. 259;8. 775;9. 703;10. V;11. GTC
ERS451417_00135	1717.62.peg.134	NA	NA	NA	0.9984	14	Caurimucosum_ATCC700975,"Cbelfantii_FRC0043","Ccamporealensis_DSM44610","Cdiphtheriae_NCTC11397","Chumireducens_DSM45392","Cmaris_DSM45190","Cmustelae_DSM45274","Cpseudotuberculosis_31","Crouxii_FRC0190","Csilvaticum_KL0182","Csingulare_IBSB52218","Culcerans_NCTC12077","Culcerans_NCTC7910","Cuterequi_DSM45634"	0.0578661	0.0578661	1.78325	0.0578661	0.0578661	1.78325	2050	2	1. 0.48589;2. 58;3. 172;4. 76;5. 76;6. 226;7. 110;8. 328;9. 34;10. K;11. AAG	1. 0.56545;2. 162;3. 484;4. 202;5. 180;6. 538;7. 214;8. 640;9. 316;10. A;11. GCG
ERS451417_00295	1717.62.peg.296	NA	NA	NA	0.9984	39	Cargentoratense_DSM44202,"Catypicum_R2070","Caurimucosum_ATCC700975","Cbelfantii_FRC0043","Ccallunae_DSM20147","Ccamporealensis_DSM44610","Cdeserti_GIMN1010","Cdiphtheriae_NCTC11397","Cdoosanense_DSM45436","Cefficiens_YS314","Cepidermidicanis_DSM45586","Cfalsenii_DSM44353","Cglutamicum_ATCC13032","Cglycinophilum_AJ3170","Chalotolerans_YIM70093","Chumireducens_DSM45392","Cimitans_DSM44264","Cjeike…	0.152657	0.152657	1.6924	0.152657	0.152657	1.6924	2	1	1. 0.61516;2. 21;3. 61;4. 22;5. 22;6. 64;7. 22;8. 64;9. 61;10. P;11. CCC
ERS451417_02145	1717.62.peg.2167	NA	NA	NA	0.9984	38	Cargentoratense_DSM44202,"Catypicum_R2070","Caurimucosum_ATCC700975","Cbelfantii_FRC0043","Ccallunae_DSM20147","Ccamporealensis_DSM44610","Cdeserti_GIMN1010","Cdiphtheriae_NCTC11397","Cdoosanense_DSM45436","Cefficiens_YS314","Cepidermidicanis_DSM45586","Cfalsenii_DSM44353","Cglutamicum_ATCC13032","Cglycinophilum_AJ3170","Chalotolerans_YIM70093","Chumireducens_DSM45392","Cimitans_DSM44264","Cjeike…	0.114196	0.114196	1.69435	0.114196	0.114196	1.69436	258	0
ERS451417_01780	1717.62.peg.1784	NA	NA	NA	0.9984	38	Cargentoratense_DSM44202,"Catypicum_R2070","Caurimucosum_ATCC700975","Cbelfantii_FRC0043","Ccallunae_DSM20147","Ccamporealensis_DSM44610","Cdeserti_GIMN1010","Cdiphtheriae_NCTC11397","Cdoosanense_DSM45436","Cefficiens_YS314","Cepidermidicanis_DSM45586","Cfalsenii_DSM44353","Cglutamicum_ATCC13032","Cglycinophilum_AJ3170","Chalotolerans_YIM70093","Chumireducens_DSM45392","Cimitans_DSM44264","Cjeike…	0.078564	0.078564	1.9956	0.078564	0.078564	1.9956	258	0
ERS451417_02206	1717.62.peg.2231	NA	NA	NA	0.9984	9	Cbelfantii_FRC0043,"Cdiphtheriae_NCTC11397","Cmustelae_DSM45274","Cpseudotuberculosis_31","Cpseudotuberculosis_ATCC19410","Csilvaticum_KL0182","Culcerans_NCTC12077","Culcerans_NCTC7910","Cvitaeruminis_DSM20294"	0.130431	0.130431	2.56521	0.130431	0.130431	2.56521	2	3	1. 0.52461;2. 53;3. 157;4. 79;5. 77;6. 229;7. 106;8. 316;9. 121;10. M;11. ATG	1. 0.44216;2. 125;3. 373;4. 205;5. 182;6. 544;7. 212;8. 634;9. 313;10. I;11. ATC	1. 0.43935;2. 253;3. 757;4. 387;5. 332;6. 994;7. 362;8. 1084;9. 679;10. A;11. GCG
ERS451417_01822	1717.62.peg.1827	NA	NA	NA	0.9989	38	Cargentoratense_DSM44202,"Catypicum_R2070","Caurimucosum_ATCC700975","Cbelfantii_FRC0043","Ccallunae_DSM20147","Ccamporealensis_DSM44610","Cdeserti_GIMN1010","Cdiphtheriae_NCTC11397","Cdoosanense_DSM45436","Cefficiens_YS314","Cepidermidicanis_DSM45586","Cfalsenii_DSM44353","Cglutamicum_ATCC13032","Cglycinophilum_AJ3170","Chalotolerans_YIM70093","Chumireducens_DSM45392","Cimitans_DSM44264","Cjeike…	0.0910831	0.0910831	1.87589	0.0910831	0.0910831	1.87589	258	0
ERS451417_00209	1717.62.peg.206	NA	NA	NA	0.9989	6	Cbelfantii_FRC0043,"Cdiphtheriae_NCTC11397","Cmustelae_DSM45274","Cpseudotuberculosis_31","Cpseudotuberculosis_ATCC19410","Crouxii_FRC0190"	0.112753	0.112753	2.86058	0.112753	0.112753	2.86058	2	3	1. 0.5126;2. 239;3. 715;4. 239;5. 239;6. 715;7. 239;8. 715;9. 715;10. S;11. TCT	1. 0.44726;2. 246;3. 736;4. 246;5. 246;6. 736;7. 246;8. 736;9. 736;10. A;11. GCG	1. 0.66653;2. 247;3. 739;4. 247;5. 247;6. 739;7. 247;8. 739;9. 739;10. I;11. ATC
ERS451417_00392	1717.62.peg.392	NA	NA	NA	0.9989	39	Cargentoratense_DSM44202,"Catypicum_R2070","Caurimucosum_ATCC700975","Cbelfantii_FRC0043","Ccallunae_DSM20147","Ccamporealensis_DSM44610","Cdeserti_GIMN1010","Cdiphtheriae_NCTC11397","Cdoosanense_DSM45436","Cefficiens_YS314","Cepidermidicanis_DSM45586","Cfalsenii_DSM44353","Cglutamicum_ATCC13032","Cglycinophilum_AJ3170","Chalotolerans_YIM70093","Chumireducens_DSM45392","Cimitans_DSM44264","Cjeike…	0.180765	0.180765	1.70135	0.180765	0.180765	1.70134	258	0
ERS451417_00187	1717.62.peg.183	NA	NA	NA	0.9989	10	Cbelfantii_FRC0043,"Cdiphtheriae_NCTC11397","Cepidermidicanis_DSM45586","Cimitans_DSM44264","Cjeikeium_K41","Cmaris_DSM45190","Crouxii_FRC0190","Csilvaticum_KL0182","Culcerans_NCTC12077","Culcerans_NCTC7910"	0.142907	0.142907	2.22377	0.142926	0.142907	2.22377	2050	2	1. 0.43369;2. 70;3. 208;4. 101;5. 75;6. 223;7. 110;8. 328;9. 106;10. V;11. GTA	1. 0.63495;2. 157;3. 469;4. 219;5. 162;6. 484;7. 199;8. 595;9. 310;10. K;11. AAA
ERS451417_01353	1717.62.peg.1361	NA	NA	NA	0.9989	38	Cargentoratense_DSM44202,"Catypicum_R2070","Caurimucosum_ATCC700975","Cbelfantii_FRC0043","Ccallunae_DSM20147","Ccamporealensis_DSM44610","Cdeserti_GIMN1010","Cdiphtheriae_NCTC11397","Cdoosanense_DSM45436","Cefficiens_YS314","Cepidermidicanis_DSM45586","Cfalsenii_DSM44353","Cglutamicum_ATCC13032","Cglycinophilum_AJ3170","Chalotolerans_YIM70093","Chumireducens_DSM45392","Cimitans_DSM44264","Cjeike…	0.127805	0.127805	1.89659	0.127805	0.127805	1.89659	2	2	1. 0.55212;2. 305;3. 913;4. 312;5. 312;6. 934;7. 317;8. 949;9. 820;10. N;11. AAC	1. 0.47705;2. 578;3. 1732;4. 585;5. 585;6. 1753;7. 590;8. 1768;9. 1639;10. F;11. TTT
ERS451417_00304	1717.62.peg.305	NA	NA	NA	0.9989	22	Catypicum_R2070,"Caurimucosum_ATCC700975","Cbelfantii_FRC0043","Ccamporealensis_DSM44610","Cdiphtheriae_NCTC11397","Cepidermidicanis_DSM45586","Chumireducens_DSM45392","Cimitans_DSM44264","Cmarinum_DSM44953","Cmustelae_DSM45274","Cpseudotuberculosis_31","Cpseudotuberculosis_ATCC19410","CriegeliiPUDD83A45","Crouxii_FRC0190","Csilvaticum_KL0182","Csimulans_PES1","Csingulare_IBSB52218","Ctestudinori…	0.115778	0.115778	1.98663	0.115778	0.115778	1.98664	2	1	1. 0.65023;2. 626;3. 1876;4. 628;5. 628;6. 1882;7. 638;8. 1912;9. 1606;10. I;11. ATT
1717.62.peg.244	1717.62.peg.244	NA	NA	NA	0.9989	39	Cargentoratense_DSM44202,"Catypicum_R2070","Caurimucosum_ATCC700975","Cbelfantii_FRC0043","Ccallunae_DSM20147","Ccamporealensis_DSM44610","Cdeserti_GIMN1010","Cdiphtheriae_NCTC11397","Cdoosanense_DSM45436","Cefficiens_YS314","Cepidermidicanis_DSM45586","Cfalsenii_DSM44353","Cglutamicum_ATCC13032","Cglycinophilum_AJ3170","Chalotolerans_YIM70093","Chumireducens_DSM45392","Cimitans_DSM44264","Cjeike…	0.589662	0.156	1.47382	0.265131	0.156	1.47382	258	0
ERS451417_01867	1717.62.peg.1869	NA	NA	NA	0.9989	38	Cargentoratense_DSM44202,"Catypicum_R2070","Caurimucosum_ATCC700975","Cbelfantii_FRC0043","Ccallunae_DSM20147","Ccamporealensis_DSM44610","Cdeserti_GIMN1010","Cdiphtheriae_NCTC11397","Cdoosanense_DSM45436","Cefficiens_YS314","Cepidermidicanis_DSM45586","Cfalsenii_DSM44353","Cglutamicum_ATCC13032","Cglycinophilum_AJ3170","Chalotolerans_YIM70093","Chumireducens_DSM45392","Cimitans_DSM44264","Cjeike…	0.145548	0.145548	1.67187	0.145548	0.145548	1.67186	2	1	1. 0.60033;2. 569;3. 1705;4. 591;5. 591;6. 1771;7. 643;8. 1927;9. 1630;10. Q;11. CAA
ERS451417_02066	1717.62.peg.2078	NA	NA	NA	0.9989	38	Cargentoratense_DSM44202,"Catypicum_R2070","Caurimucosum_ATCC700975","Cbelfantii_FRC0043","Ccallunae_DSM20147","Ccamporealensis_DSM44610","Cdeserti_GIMN1010","Cdiphtheriae_NCTC11397","Cdoosanense_DSM45436","Cefficiens_YS314","Cepidermidicanis_DSM45586","Cfalsenii_DSM44353","Cglutamicum_ATCC13032","Cglycinophilum_AJ3170","Chalotolerans_YIM70093","Chumireducens_DSM45392","Cimitans_DSM44264","Cjeike…	0.0917871	0.0917871	2.21558	0.0917871	0.0917871	2.21556	258	0
ERS451417_00883	1717.62.peg.889	NA	NA	NA	0.9989	38	Cargentoratense_DSM44202,"Catypicum_R2070","Caurimucosum_ATCC700975","Cbelfantii_FRC0043","Ccallunae_DSM20147","Ccamporealensis_DSM44610","Cdeserti_GIMN1010","Cdiphtheriae_NCTC11397","Cdoosanense_DSM45436","Cefficiens_YS314","Cepidermidicanis_DSM45586","Cfalsenii_DSM44353","Cglutamicum_ATCC13032","Cglycinophilum_AJ3170","Chalotolerans_YIM70093","Chumireducens_DSM45392","Cimitans_DSM44264","Cjeike…	0.163223	0.163223	1.67794	0.163223	0.163223	1.67794	3074	1	1. 0.5496;2. 271;3. 811;4. 304;5. 304;6. 910;7. 426;8. 1276;9. 715;10. D;11. GAC
ERS451417_02278	1717.62.peg.2307	NA	NA	NA	0.9989	4	Cbelfantii_FRC0043,"Cdiphtheriae_NCTC11397","Chalotolerans_YIM70093","Cmarinum_DSM44953"	0.303133	0.302663	1.1696	0.303661	0.302673	1.16961	258	0
ERS451417_00988	1717.62.peg.999	NA	NA	NA	0.9989	39	Cargentoratense_DSM44202,"Catypicum_R2070","Caurimucosum_ATCC700975","Cbelfantii_FRC0043","Ccallunae_DSM20147","Ccamporealensis_DSM44610","Cdeserti_GIMN1010","Cdiphtheriae_NCTC11397","Cdoosanense_DSM45436","Cefficiens_YS314","Cepidermidicanis_DSM45586","Cfalsenii_DSM44353","Cglutamicum_ATCC13032","Cglycinophilum_AJ3170","Chalotolerans_YIM70093","Chumireducens_DSM45392","Cimitans_DSM44264","Cjeike…	0.572762	0.215222	1.60315	0.332376	0.215222	1.60315	258	0
ERS451417_02065	1717.62.peg.2077	NA	NA	NA	0.9989	7	Cbelfantii_FRC0043,"Cdiphtheriae_NCTC11397","Cpseudotuberculosis_31","Cpseudotuberculosis_ATCC19410","Csilvaticum_KL0182","Culcerans_NCTC12077","Culcerans_NCTC7910"	0.118868	0.118868	2.20552	0.120815	0.118868	2.20552	258	0
ERS451417_02120	1717.62.peg.2135	NA	NA	NA	0.9989	36	Cargentoratense_DSM44202,"Catypicum_R2070","Caurimucosum_ATCC700975","Cbelfantii_FRC0043","Ccallunae_DSM20147","Ccamporealensis_DSM44610","Cdeserti_GIMN1010","Cdiphtheriae_NCTC11397","Cdoosanense_DSM45436","Cefficiens_YS314","Cepidermidicanis_DSM45586","Cfalsenii_DSM44353","Cglutamicum_ATCC13032","Cglycinophilum_AJ3170","Chalotolerans_YIM70093","Chumireducens_DSM45392","Cimitans_DSM44264","Cjeike…	0.127168	0.127168	1.78105	0.127168	0.127168	1.78105	258	0
ERS451417_01985	1717.62.peg.1985	NA	NA	NA	0.9989	13	Catypicum_R2070,"Caurimucosum_ATCC700975","Cbelfantii_FRC0043","Cdiphtheriae_NCTC11397","Cimitans_DSM44264","Ckutscheri_DSM20755","Cpseudotuberculosis_ATCC19410","Csilvaticum_KL0182","Csimulans_PES1","Csingulare_IBSB52218","Culcerans_NCTC12077","Culcerans_NCTC7910","Cvitaeruminis_DSM20294"	0.156046	0.156046	2.4839	0.156046	0.156046	2.4839	2	1	1. 0.56029;2. 86;3. 256;4. 103;5. 103;6. 307;7. 114;8. 340;9. 253;10. Q;11. CAG
ERS451417_02238	1717.62.peg.2263	NA	NA	NA	0.9989	38	Cargentoratense_DSM44202,"Catypicum_R2070","Caurimucosum_ATCC700975","Cbelfantii_FRC0043","Ccallunae_DSM20147","Ccamporealensis_DSM44610","Cdeserti_GIMN1010","Cdiphtheriae_NCTC11397","Cdoosanense_DSM45436","Cefficiens_YS314","Cepidermidicanis_DSM45586","Cfalsenii_DSM44353","Cglutamicum_ATCC13032","Cglycinophilum_AJ3170","Chalotolerans_YIM70093","Chumireducens_DSM45392","Cimitans_DSM44264","Cjeike…	0.105175	0.105175	1.60899	0.105175	0.105175	1.609	2	1	1. 0.59007;2. 303;3. 907;4. 342;5. 342;6. 1024;7. 443;8. 1327;9. 886;10. H;11. CAC
ERS451417_00826	1717.62.peg.830	NA	NA	NA	0.9989	14	Cbelfantii_FRC0043,"Ccallunae_DSM20147","Cdeserti_GIMN1010","Cdiphtheriae_NCTC11397","Cefficiens_YS314","Cglutamicum_ATCC13032","Ckutscheri_DSM20755","Cmustelae_DSM45274","Cpseudotuberculosis_31","Cpseudotuberculosis_ATCC19410","Crouxii_FRC0190","Csilvaticum_KL0182","Culcerans_NCTC12077","Culcerans_NCTC7910"	0.160245	0.160245	2.14047	0.160245	0.160245	2.14047	3330	0
ERS451417_01039	1717.62.peg.1049	NA	NA	NA	0.9989	8	Cbelfantii_FRC0043,"Cdiphtheriae_NCTC11397","Cpseudotuberculosis_31","Cpseudotuberculosis_ATCC19410","Crouxii_FRC0190","Csilvaticum_KL0182","Culcerans_NCTC12077","Culcerans_NCTC7910"	0.112107	0.112107	3.34995	0.112107	0.112107	3.34996	258	0
ERS451417_01586	1717.62.peg.1595	NA	NA	NA	0.9989	37	Cargentoratense_DSM44202,"Catypicum_R2070","Caurimucosum_ATCC700975","Cbelfantii_FRC0043","Ccallunae_DSM20147","Ccamporealensis_DSM44610","Cdeserti_GIMN1010","Cdiphtheriae_NCTC11397","Cdoosanense_DSM45436","Cefficiens_YS314","Cepidermidicanis_DSM45586","Cfalsenii_DSM44353","Cglutamicum_ATCC13032","Cglycinophilum_AJ3170","Chalotolerans_YIM70093","Chumireducens_DSM45392","Cimitans_DSM44264","Cjeike…	0.433516	0.194168	1.68572	0.433669	0.194168	1.68573	2	2	1. 0.80838;2. 32;3. 94;4. 50;5. 50;6. 148;7. 100;8. 298;9. 76;10. E;11. GAA	1. 0.77092;2. 121;3. 361;4. 139;5. 139;6. 415;7. 189;8. 565;9. 343;10. T;11. ACC
ERS451417_01825	1717.62.peg.1830	NA	NA	NA	0.9989	17	Cbelfantii_FRC0043,"Ccallunae_DSM20147","Cdeserti_GIMN1010","Cdiphtheriae_NCTC11397","Cdoosanense_DSM45436","Cepidermidicanis_DSM45586","Cglutamicum_ATCC13032","Ckutscheri_DSM20755","Clactis_RW25","Cpseudotuberculosis_31","Cpseudotuberculosis_ATCC19410","Csilvaticum_KL0182","Csimulans_PES1","Culcerans_NCTC12077","Culcerans_NCTC7910","Cuterequi_DSM45634","Cvitaeruminis_DSM20294"	0.155859	0.155859	1.96353	0.155859	0.155859	1.96353	258	0
ERS451417_00395	1717.62.peg.395	NA	NA	NA	0.9989	39	Cargentoratense_DSM44202,"Catypicum_R2070","Caurimucosum_ATCC700975","Cbelfantii_FRC0043","Ccallunae_DSM20147","Ccamporealensis_DSM44610","Cdeserti_GIMN1010","Cdiphtheriae_NCTC11397","Cdoosanense_DSM45436","Cefficiens_YS314","Cepidermidicanis_DSM45586","Cfalsenii_DSM44353","Cglutamicum_ATCC13032","Cglycinophilum_AJ3170","Chalotolerans_YIM70093","Chumireducens_DSM45392","Cimitans_DSM44264","Cjeike…	0.159485	0.0172366	2.55815	0.0671837	0.0172366	2.55815	258	0
ERS451417_01643	1717.62.peg.1650	NA	NA	NA	0.9989	38	Cargentoratense_DSM44202,"Catypicum_R2070","Caurimucosum_ATCC700975","Cbelfantii_FRC0043","Ccallunae_DSM20147","Ccamporealensis_DSM44610","Cdeserti_GIMN1010","Cdiphtheriae_NCTC11397","Cdoosanense_DSM45436","Cefficiens_YS314","Cepidermidicanis_DSM45586","Cfalsenii_DSM44353","Cglutamicum_ATCC13032","Cglycinophilum_AJ3170","Chalotolerans_YIM70093","Chumireducens_DSM45392","Cimitans_DSM44264","Cjeike…	0.263018	0.263018	1.5811	0.263018	0.263018	1.5811	1282	0
ERS451417_00598	1717.62.peg.602	NA	NA	NA	0.9989	12	Cdiphtheriae_NCTC11397,"Chalotolerans_YIM70093","Chumireducens_DSM45392","Cmarinum_DSM44953","Cpseudotuberculosis_31","Cpseudotuberculosis_ATCC19410","Crouxii_FRC0190","Csilvaticum_KL0182","Csimulans_PES1","Ctestudinoris_DSM44614","Culcerans_NCTC12077","Culcerans_NCTC7910"	0.208422	0.206389	2.77373	0.212621	0.206389	2.77372	6402	0
ERS451417_02159	1717.62.peg.2184	NA	NA	NA	0.9989	6	Cbelfantii_FRC0043,"Cdiphtheriae_NCTC11397","Cepidermidicanis_DSM45586","Csimulans_PES1","Cuterequi_DSM45634","Cvitaeruminis_DSM20294"	0.340179	0.340179	1.84338	0.340179	0.340179	1.84338	2	2	1. 0.6236;2. 263;3. 787;4. 266;5. 266;6. 796;7. 287;8. 859;9. 538;10. A;11. GCC	1. 0.51263;2. 415;3. 1243;4. 419;5. 419;6. 1255;7. 440;8. 1318;9. 964;10. H;11. CAC
ERS451417_01494	1717.62.peg.1502	NA	NA	NA	0.9989	30	Catypicum_R2070,"Caurimucosum_ATCC700975","Cbelfantii_FRC0043","Ccallunae_DSM20147","Ccamporealensis_DSM44610","Cdeserti_GIMN1010","Cdiphtheriae_NCTC11397","Cdoosanense_DSM45436","Cefficiens_YS314","Cglutamicum_ATCC13032","Chalotolerans_YIM70093","Chumireducens_DSM45392","Cimitans_DSM44264","Ckutscheri_DSM20755","Clactis_RW25","Cmarinum_DSM44953","Cmaris_DSM45190","Cmustelae_DSM45274","Cpseudotub…	0.14467	0.14467	1.73426	0.14467	0.14467	1.73426	2050	1	1. 0.67512;2. 260;3. 778;4. 274;5. 264;6. 790;7. 269;8. 805;9. 610;10. V;11. GTA
ERS451417_02405	1717.62.peg.2437	NA	NA	NA	0.9989	33	Cargentoratense_DSM44202,"Catypicum_R2070","Caurimucosum_ATCC700975","Cbelfantii_FRC0043","Ccallunae_DSM20147","Ccamporealensis_DSM44610","Cdeserti_GIMN1010","Cdiphtheriae_NCTC11397","Cdoosanense_DSM45436","Cefficiens_YS314","Cepidermidicanis_DSM45586","Cfalsenii_DSM44353","Cglutamicum_ATCC13032","Cimitans_DSM44264","Cjeikeium_K41","Ckroppenstedtii_DSM44385","Ckutscheri_DSM20755","Clactis_RW25","…	0.696155	0.249322	2.12097	0.389676	0.249322	2.12097	258	0
ERS451417_00600	1717.62.peg.604	NA	NA	NA	0.9989	39	Cargentoratense_DSM44202,"Catypicum_R2070","Caurimucosum_ATCC700975","Cbelfantii_FRC0043","Ccallunae_DSM20147","Ccamporealensis_DSM44610","Cdeserti_GIMN1010","Cdiphtheriae_NCTC11397","Cdoosanense_DSM45436","Cefficiens_YS314","Cepidermidicanis_DSM45586","Cfalsenii_DSM44353","Cglutamicum_ATCC13032","Cglycinophilum_AJ3170","Chalotolerans_YIM70093","Chumireducens_DSM45392","Cimitans_DSM44264","Cjeike…	0.103186	0.103186	1.965	0.103186	0.103186	1.965	3330	0
ERS451417_00358	1717.62.peg.357	NA	NA	NA	0.9989	39	Cargentoratense_DSM44202,"Catypicum_R2070","Caurimucosum_ATCC700975","Cbelfantii_FRC0043","Ccallunae_DSM20147","Ccamporealensis_DSM44610","Cdeserti_GIMN1010","Cdiphtheriae_NCTC11397","Cdoosanense_DSM45436","Cefficiens_YS314","Cepidermidicanis_DSM45586","Cfalsenii_DSM44353","Cglutamicum_ATCC13032","Cglycinophilum_AJ3170","Chalotolerans_YIM70093","Chumireducens_DSM45392","Cimitans_DSM44264","Cjeike…	0.185403	0.185403	1.87577	0.185403	0.185403	1.87576	258	0
ERS451417_01164	1717.62.peg.1175	NA	NA	NA	0.9989	37	Cargentoratense_DSM44202,"Catypicum_R2070","Caurimucosum_ATCC700975","Cbelfantii_FRC0043","Ccallunae_DSM20147","Ccamporealensis_DSM44610","Cdeserti_GIMN1010","Cdiphtheriae_NCTC11397","Cdoosanense_DSM45436","Cefficiens_YS314","Cfalsenii_DSM44353","Cglutamicum_ATCC13032","Cglycinophilum_AJ3170","Chalotolerans_YIM70093","Chumireducens_DSM45392","Cimitans_DSM44264","Cjeikeium_K41","Ckroppenstedtii_DS…	0.171397	0.171397	1.61331	0.171397	0.171397	1.61331	3330	0
ERS451417_00496	1717.62.peg.499	NA	NA	NA	0.9989	39	Cargentoratense_DSM44202,"Catypicum_R2070","Caurimucosum_ATCC700975","Cbelfantii_FRC0043","Ccallunae_DSM20147","Ccamporealensis_DSM44610","Cdeserti_GIMN1010","Cdiphtheriae_NCTC11397","Cdoosanense_DSM45436","Cefficiens_YS314","Cepidermidicanis_DSM45586","Cfalsenii_DSM44353","Cglutamicum_ATCC13032","Cglycinophilum_AJ3170","Chalotolerans_YIM70093","Chumireducens_DSM45392","Cimitans_DSM44264","Cjeike…	0.192375	0.192375	1.66788	0.192375	0.192375	1.66788	3330	0
ERS451417_02214	1717.62.peg.2238	NA	NA	NA	0.9989	11	Cbelfantii_FRC0043,"Cdiphtheriae_NCTC11397","Chumireducens_DSM45392","Cmarinum_DSM44953","Cpseudotuberculosis_31","Cpseudotuberculosis_ATCC19410","Csilvaticum_KL0182","Ctestudinoris_DSM44614","Culcerans_NCTC12077","Culcerans_NCTC7910","Cvitaeruminis_DSM20294"	0.072013	0.072013	2.19452	0.072013	0.072013	2.19452	2	3	1. 0.4692;2. 48;3. 142;4. 116;5. 52;6. 154;7. 52;8. 154;9. 97;10. F;11. TTC	1. 0.61579;2. 63;3. 187;4. 131;5. 67;6. 199;7. 67;8. 199;9. 142;10. G;11. GGA	1. 0.6389;2. 80;3. 238;4. 149;5. 84;6. 250;7. 84;8. 250;9. 193;10. R;11. CGG
ERS451417_00719	1717.62.peg.724	NA	NA	NA	0.9989	34	Cargentoratense_DSM44202,"Caurimucosum_ATCC700975","Cbelfantii_FRC0043","Ccallunae_DSM20147","Ccamporealensis_DSM44610","Cdeserti_GIMN1010","Cdiphtheriae_NCTC11397","Cdoosanense_DSM45436","Cefficiens_YS314","Cepidermidicanis_DSM45586","Cfalsenii_DSM44353","Cglutamicum_ATCC13032","Cglycinophilum_AJ3170","Chalotolerans_YIM70093","Chumireducens_DSM45392","Cimitans_DSM44264","Clactis_RW25","Cmarinum_…	0.145149	0.145149	1.72678	0.14514	0.14514	1.72679	2	4	1. 0.43297;2. 93;3. 277;4. 111;5. 111;6. 331;7. 123;8. 367;9. 139;10. F;11. TTC	1. 0.45486;2. 211;3. 631;4. 229;5. 229;6. 685;7. 242;8. 724;9. 481;10. S;11. AGC	1. 0.4617;2. 269;3. 805;4. 288;5. 288;6. 862;7. 321;8. 961;9. 604;10. L;11. CTC	1. 0.45365;2. 504;3. 1510;4. 525;5. 525;6. 1573;7. 558;8. 1672;9. 1309;10. S;11. AGC
ERS451417_01152	1717.62.peg.1163	NA	NA	NA	0.9989	39	Cargentoratense_DSM44202,"Catypicum_R2070","Caurimucosum_ATCC700975","Cbelfantii_FRC0043","Ccallunae_DSM20147","Ccamporealensis_DSM44610","Cdeserti_GIMN1010","Cdiphtheriae_NCTC11397","Cdoosanense_DSM45436","Cefficiens_YS314","Cepidermidicanis_DSM45586","Cfalsenii_DSM44353","Cglutamicum_ATCC13032","Cglycinophilum_AJ3170","Chalotolerans_YIM70093","Chumireducens_DSM45392","Cimitans_DSM44264","Cjeike…	0.113391	0.113391	1.56979	0.113391	0.113391	1.56979	2	2	1. 0.50253;2. 391;3. 1171;4. 420;5. 420;6. 1258;7. 431;8. 1291;9. 1111;10. D;11. GAT	1. 0.58749;2. 660;3. 1978;4. 693;5. 693;6. 2077;7. 708;8. 2122;9. 1888;10. V;11. GTA
ERS451417_01431	1717.62.peg.1437	NA	NA	NA	0.9989	38	Cargentoratense_DSM44202,"Catypicum_R2070","Caurimucosum_ATCC700975","Cbelfantii_FRC0043","Ccallunae_DSM20147","Ccamporealensis_DSM44610","Cdeserti_GIMN1010","Cdiphtheriae_NCTC11397","Cdoosanense_DSM45436","Cefficiens_YS314","Cepidermidicanis_DSM45586","Cfalsenii_DSM44353","Cglutamicum_ATCC13032","Cglycinophilum_AJ3170","Chalotolerans_YIM70093","Chumireducens_DSM45392","Cimitans_DSM44264","Cjeike…	0.067254	0.067254	1.39392	0.067254	0.067254	1.39391	1026	1	1. 0.47499;2. 471;3. 1411;4. 495;5. 495;6. 1483;7. 531;8. 1591;9. 1246;10. H;11. CAT
ERS451417_02304	1717.62.peg.2331	NA	NA	NA	0.9989	5	Cbelfantii_FRC0043,"Cdiphtheriae_NCTC11397","Cpseudotuberculosis_31","Cpseudotuberculosis_ATCC19410","Csilvaticum_KL0182"	0.458645	0.458645	5.28614	0.459276	0.458645	5.28614	258	0
ERS451417_00032	1717.62.peg.29	NA	NA	NA	1	12	Cbelfantii_FRC0043,"Ccallunae_DSM20147","Cdeserti_GIMN1010","Cdiphtheriae_NCTC11397","Cefficiens_YS314","Cglutamicum_ATCC13032","Cpseudotuberculosis_31","Crouxii_FRC0190","Csilvaticum_KL0182","Culcerans_NCTC12077","Culcerans_NCTC7910","Cvitaeruminis_DSM20294"	0.0774465	0.0774465	1.84383	0.0774465	0.0774465	1.84383	1282	0
ERS451417_02271	1717.62.peg.2300	NA	NA	NA	1	3	Cdiphtheriae_NCTC11397,"Cpseudotuberculosis_31","Cpseudotuberculosis_ATCC19410"	0.122901	0.0291691	2.25338	0.122901	0.0291691	2.25337	4226	9	1. 0.4117;2. 99;3. 295;4. 111;5. 104;6. 310;7. 116;8. 346;9. 226;10. I;11. ATA	1. 0.41498;2. 166;3. 496;4. 178;5. 171;6. 511;7. 183;8. 547;9. 421;10. R;11. CGT	1. 0.42425;2. 252;3. 754;4. 269;5. 257;6. 769;7. 269;8. 805;9. 679;10. A;11. GCC	1. 0.40642;2. 444;3. 1330;4. 461;5. 449;6. 1345;7. 461;8. 1381;9. 1255;10. C;11. TGC	1. 0.45755;2. 449;3. 1345;4. 466;5. 454;6. 1360;7. 466;8. 1396;9. 1270;10. H;11. CAT	1. 0.46335;2. 573;3. 1717;4. 590;5. 578;6. 1732;7. 590;8. 1768;9. 1642;10. S;11. TCG	1. 0.42521;2. 598;3. 1792;4. 615;5. 603;6. 1807;7. 615;8. 1843;9. 1717;10. D;11. GAT	1. 0.42757;2. 674;3. 2020;4. 695;5. 679;6. 2035;7. 691;8. 2071;9. 1945;10. R;11. CGA	1. 0.43913;2. 723;3. 2167;4. 744;5. 728;6. 2182;7. 740;8. 2218;9. 2092;10. E;11. GAG
ERS451417_00252	1717.62.peg.247	NA	NA	NA	1	10	Cargentoratense_DSM44202,"Cbelfantii_FRC0043","Cdiphtheriae_NCTC11397","Ckutscheri_DSM20755","Cmustelae_DSM45274","Cpseudotuberculosis_ATCC19410","Crouxii_FRC0190","Csilvaticum_KL0182","Culcerans_NCTC12077","Culcerans_NCTC7910"	0.0915182	0.0915182	2.29055	0.0915182	0.0915182	2.29055	3074	2	1. 0.56701;2. 8;3. 22;4. 33;5. 22;6. 64;7. 38;8. 112;9. 4;10. L;11. CTC	1. 0.49523;2. 12;3. 34;4. 37;5. 26;6. 76;7. 42;8. 124;9. 16;10. L;11. TTA
ERS451417_01419	1717.62.peg.1425	NA	NA	NA	1	17	Cbelfantii_FRC0043,"Ccallunae_DSM20147","Cdeserti_GIMN1010","Cdiphtheriae_NCTC11397","Cdoosanense_DSM45436","Cefficiens_YS314","Cglutamicum_ATCC13032","Chalotolerans_YIM70093","Chumireducens_DSM45392","Cmarinum_DSM44953","Cmaris_DSM45190","Cpseudotuberculosis_31","Cpseudotuberculosis_ATCC19410","Csilvaticum_KL0182","Ctestudinoris_DSM44614","Culcerans_NCTC12077","Culcerans_NCTC7910"	0.349747	0.301766	1.72546	0.349747	0.301766	1.72546	2	3	1. 0.7112;2. 60;3. 178;4. 103;5. 60;6. 178;7. 60;8. 178;9. 166;10. E;11. GAA	1. 0.7187;2. 190;3. 568;4. 239;5. 190;6. 568;7. 190;8. 568;9. 556;10. R;11. AGA	1. 0.70628;2. 243;3. 727;4. 295;5. 244;6. 730;7. 252;8. 754;9. 673;10. N;11. AAT
ERS451417_00006	1717.62.peg.7	NA	NA	NA	1	16	Cbelfantii_FRC0043,"Ccamporealensis_DSM44610","Cdiphtheriae_NCTC11397","Chalotolerans_YIM70093","Chumireducens_DSM45392","Ckutscheri_DSM20755","Cmaris_DSM45190","Cpseudotuberculosis_31","Cpseudotuberculosis_ATCC19410","Crouxii_FRC0190","Csilvaticum_KL0182","Csimulans_PES1","Ctestudinoris_DSM44614","Culcerans_NCTC12077","Culcerans_NCTC7910","Cvitaeruminis_DSM20294"	0.149143	0.149143	1.92334	0.149143	0.149143	1.92334	258	0
ERS451417_01928	1717.62.peg.1925	NA	NA	NA	1	38	Cargentoratense_DSM44202,"Catypicum_R2070","Caurimucosum_ATCC700975","Cbelfantii_FRC0043","Ccallunae_DSM20147","Ccamporealensis_DSM44610","Cdeserti_GIMN1010","Cdiphtheriae_NCTC11397","Cdoosanense_DSM45436","Cefficiens_YS314","Cepidermidicanis_DSM45586","Cfalsenii_DSM44353","Cglutamicum_ATCC13032","Cglycinophilum_AJ3170","Chalotolerans_YIM70093","Chumireducens_DSM45392","Cimitans_DSM44264","Cjeike…	0.138329	0.106071	1.67446	0.138319	0.10607	1.67446	1026	6	1. 0.43613;2. 101;3. 301;4. 162;5. 162;6. 484;7. 265;8. 793;9. 241;10. N;11. AAC	1. 0.57198;2. 151;3. 451;4. 219;5. 219;6. 655;7. 322;8. 964;9. 385;10. I;11. ATC	1. 0.5307;2. 224;3. 670;4. 295;5. 295;6. 883;7. 403;8. 1207;9. 586;10. A;11. GCC	1. 0.62266;2. 294;3. 880;4. 365;5. 365;6. 1093;7. 473;8. 1417;9. 796;10. S;11. AGC	1. 0.43021;2. 316;3. 946;4. 387;5. 387;6. 1159;7. 495;8. 1483;9. 862;10. S;11. AGC	1. 0.58935;2. 365;3. 1093;4. 440;5. 440;6. 1318;7. 551;8. 1651;9. 970;10. A;11. GCC
ERS451417_00511	1717.62.peg.515	NA	NA	NA	1	33	Cargentoratense_DSM44202,"Catypicum_R2070","Caurimucosum_ATCC700975","Cbelfantii_FRC0043","Ccallunae_DSM20147","Ccamporealensis_DSM44610","Cdeserti_GIMN1010","Cdiphtheriae_NCTC11397","Cdoosanense_DSM45436","Cefficiens_YS314","Cepidermidicanis_DSM45586","Cglutamicum_ATCC13032","Cglycinophilum_AJ3170","Chalotolerans_YIM70093","Chumireducens_DSM45392","Cimitans_DSM44264","Ckutscheri_DSM20755","Cmari…	0.175446	0.175446	1.77006	0.175446	0.175446	1.77006	1282	0
ERS451417_00465	1717.62.peg.469	NA	NA	NA	1	5	Cbelfantii_FRC0043,"Cdiphtheriae_NCTC11397","Ckutscheri_DSM20755","Crouxii_FRC0190","Cterpenotabidum_Y11"	0.190889	0.190889	2.3739	0.190907	0.190907	2.3739	2050	5	1. 0.56009;2. 126;3. 376;4. 194;5. 129;6. 385;7. 135;8. 403;9. 346;10. S;11. AGT	1. 0.52527;2. 197;3. 589;4. 281;5. 200;6. 598;7. 210;8. 628;9. 505;10. D;11. GAT	1. 0.50916;2. 317;3. 949;4. 438;5. 326;6. 976;7. 351;8. 1051;9. 790;10. C;11. TGT	1. 0.74073;2. 444;3. 1330;4. 584;5. 456;6. 1366;7. 491;8. 1471;9. 1114;10. S;11. TCG	1. 0.51452;2. 538;3. 1612;4. 745;5. 554;6. 1660;7. 619;8. 1855;9. 1285;10. S;11. AGC
ERS451417_00455	1717.62.peg.459	NA	NA	NA	1	30	Caurimucosum_ATCC700975,"Cbelfantii_FRC0043","Ccallunae_DSM20147","Ccamporealensis_DSM44610","Cdeserti_GIMN1010","Cdiphtheriae_NCTC11397","Cefficiens_YS314","Cepidermidicanis_DSM45586","Cglutamicum_ATCC13032","Cglycinophilum_AJ3170","Chalotolerans_YIM70093","Chumireducens_DSM45392","Ckroppenstedtii_DSM44385","Ckutscheri_DSM20755","Cmarinum_DSM44953","Cmaris_DSM45190","Cmustelae_DSM45274","Cpseudo…	0.229024	0.229024	1.92479	0.229024	0.229024	1.9248	3330	0
ERS451417_00401	1717.62.peg.401	NA	NA	NA	1	38	Cargentoratense_DSM44202,"Catypicum_R2070","Caurimucosum_ATCC700975","Cbelfantii_FRC0043","Ccallunae_DSM20147","Ccamporealensis_DSM44610","Cdeserti_GIMN1010","Cdiphtheriae_NCTC11397","Cdoosanense_DSM45436","Cefficiens_YS314","Cepidermidicanis_DSM45586","Cfalsenii_DSM44353","Cglutamicum_ATCC13032","Cglycinophilum_AJ3170","Chalotolerans_YIM70093","Chumireducens_DSM45392","Cimitans_DSM44264","Cjeike…	0.109608	0.109608	1.91682	0.109608	0.109608	1.91682	2306	0
ERS451417_02402	1717.62.peg.2434	NA	NA	NA	1	35	Cargentoratense_DSM44202,"Catypicum_R2070","Caurimucosum_ATCC700975","Cbelfantii_FRC0043","Ccallunae_DSM20147","Ccamporealensis_DSM44610","Cdeserti_GIMN1010","Cdiphtheriae_NCTC11397","Cefficiens_YS314","Cepidermidicanis_DSM45586","Cfalsenii_DSM44353","Cglutamicum_ATCC13032","Cglycinophilum_AJ3170","Chalotolerans_YIM70093","Chumireducens_DSM45392","Cimitans_DSM44264","Cjeikeium_K41","Ckroppenstedt…	0.106226	0.106226	1.64778	0.106226	0.106226	1.64778	3074	2	1. 0.60452;2. 197;3. 589;4. 209;5. 209;6. 625;7. 236;8. 706;9. 403;10. V;11. GTG	1. 0.62836;2. 257;3. 769;4. 273;5. 272;6. 814;7. 304;8. 910;9. 529;10. L;11. TTG
ERS451417_02196	1717.62.peg.2222	NA	NA	NA	1	3	Cbelfantii_FRC0043,"Cdiphtheriae_NCTC11397","Cuterequi_DSM45634"	89.0548	0.228613	1.86747	0.999732	0.228613	1.86749	384	0
ERS451417_00804	1717.62.peg.811	NA	NA	NA	1	39	Cargentoratense_DSM44202,"Catypicum_R2070","Caurimucosum_ATCC700975","Cbelfantii_FRC0043","Ccallunae_DSM20147","Ccamporealensis_DSM44610","Cdeserti_GIMN1010","Cdiphtheriae_NCTC11397","Cdoosanense_DSM45436","Cefficiens_YS314","Cepidermidicanis_DSM45586","Cfalsenii_DSM44353","Cglutamicum_ATCC13032","Cglycinophilum_AJ3170","Chalotolerans_YIM70093","Chumireducens_DSM45392","Cimitans_DSM44264","Cjeike…	0.204243	0.204195	1.7809	0.208715	0.204197	1.781	3074	2	1. 0.57648;2. 188;3. 562;4. 219;5. 219;6. 655;7. 302;8. 904;9. 250;10. A;11. GCC	1. 0.64007;2. 303;3. 907;4. 334;5. 334;6. 1000;7. 417;8. 1249;9. 595;10. L;11. CTT
ERS451417_02360	1717.62.peg.2389	NA	NA	NA	1	12	Caurimucosum_ATCC700975,"Cbelfantii_FRC0043","Cdiphtheriae_NCTC11397","Ckroppenstedtii_DSM44385","Cpseudotuberculosis_31","Cpseudotuberculosis_ATCC19410","Csilvaticum_KL0182","Csimulans_PES1","Csingulare_IBSB52218","Culcerans_NCTC12077","Culcerans_NCTC7910","Cuterequi_DSM45634"	0.259081	0.118522	2.4325	0.259081	0.118522	2.4325	2	2	1. 0.78144;2. 132;3. 394;4. 157;5. 148;6. 442;7. 149;8. 445;9. 358;10. N;11. AAT	1. 0.78731;2. 228;3. 682;4. 272;5. 244;6. 730;7. 245;8. 733;9. 646;10. N;11. AAT
ERS451417_00419	1717.62.peg.419	NA	NA	NA	1	15	Catypicum_R2070,"Ccamporealensis_DSM44610","Cdiphtheriae_NCTC11397","Cdoosanense_DSM45436","Cefficiens_YS314","Cglutamicum_ATCC13032","Chalotolerans_YIM70093","Cimitans_DSM44264","Ckutscheri_DSM20755","Cmarinum_DSM44953","Cmaris_DSM45190","Csimulans_PES1","Ctestudinoris_DSM44614","Cuterequi_DSM45634","Cvitaeruminis_DSM20294"	0.0970345	0.0970345	1.53347	0.0970345	0.0970345	1.53347	4098	1	1. 0.76993;2. 115;3. 343;4. 115;5. 115;6. 343;7. 115;8. 343;9. 328;10. R;11. CGT
ERS451417_00815	1717.62.peg.821	NA	NA	NA	1	31	Catypicum_R2070,"Caurimucosum_ATCC700975","Cbelfantii_FRC0043","Ccallunae_DSM20147","Ccamporealensis_DSM44610","Cdeserti_GIMN1010","Cdiphtheriae_NCTC11397","Cefficiens_YS314","Cepidermidicanis_DSM45586","Cfalsenii_DSM44353","Cglutamicum_ATCC13032","Cglycinophilum_AJ3170","Chalotolerans_YIM70093","Chumireducens_DSM45392","Cimitans_DSM44264","Cjeikeium_K41","Cmarinum_DSM44953","Cmustelae_DSM45274",…	0.129117	0.129117	1.92415	0.129117	0.129117	1.92415	3330	0
ERS451417_01803	1717.62.peg.1809	NA	NA	NA	1	38	Cargentoratense_DSM44202,"Catypicum_R2070","Caurimucosum_ATCC700975","Cbelfantii_FRC0043","Ccallunae_DSM20147","Ccamporealensis_DSM44610","Cdeserti_GIMN1010","Cdiphtheriae_NCTC11397","Cdoosanense_DSM45436","Cefficiens_YS314","Cepidermidicanis_DSM45586","Cfalsenii_DSM44353","Cglutamicum_ATCC13032","Cglycinophilum_AJ3170","Chalotolerans_YIM70093","Chumireducens_DSM45392","Cimitans_DSM44264","Cjeike…	0.178795	0.178795	1.80236	0.178795	0.178795	1.80236	258	0
ERS451417_00336	1717.62.peg.338	NA	NA	NA	1	39	Cargentoratense_DSM44202,"Catypicum_R2070","Caurimucosum_ATCC700975","Cbelfantii_FRC0043","Ccallunae_DSM20147","Ccamporealensis_DSM44610","Cdeserti_GIMN1010","Cdiphtheriae_NCTC11397","Cdoosanense_DSM45436","Cefficiens_YS314","Cepidermidicanis_DSM45586","Cfalsenii_DSM44353","Cglutamicum_ATCC13032","Cglycinophilum_AJ3170","Chalotolerans_YIM70093","Chumireducens_DSM45392","Cimitans_DSM44264","Cjeike…	0.141156	0.141156	1.57295	0.141156	0.141156	1.57295	1026	3	1. 0.55591;2. 101;3. 301;4. 120;5. 120;6. 358;7. 150;8. 448;9. 259;10. T;11. ACG	1. 0.56489;2. 327;3. 979;4. 366;5. 366;6. 1096;7. 427;8. 1279;9. 799;10. V;11. GTG	1. 0.58655;2. 383;3. 1147;4. 423;5. 423;6. 1267;7. 484;8. 1450;9. 964;10. I;11. ATT
ERS451417_00302	1717.62.peg.303	NA	NA	NA	1	22	Catypicum_R2070,"Caurimucosum_ATCC700975","Cbelfantii_FRC0043","Ccamporealensis_DSM44610","Cdiphtheriae_NCTC11397","Cepidermidicanis_DSM45586","Chumireducens_DSM45392","Cimitans_DSM44264","Cmarinum_DSM44953","Cmustelae_DSM45274","Cpseudotuberculosis_31","Cpseudotuberculosis_ATCC19410","CriegeliiPUDD83A45","Crouxii_FRC0190","Csilvaticum_KL0182","Csimulans_PES1","Csingulare_IBSB52218","Ctestudinori…	0.105787	0.105787	2.07503	0.105787	0.105787	2.07503	258	0
ERS451417_01668	1717.62.peg.1675	NA	NA	NA	1	38	Cargentoratense_DSM44202,"Catypicum_R2070","Caurimucosum_ATCC700975","Cbelfantii_FRC0043","Ccallunae_DSM20147","Ccamporealensis_DSM44610","Cdeserti_GIMN1010","Cdiphtheriae_NCTC11397","Cdoosanense_DSM45436","Cefficiens_YS314","Cepidermidicanis_DSM45586","Cfalsenii_DSM44353","Cglutamicum_ATCC13032","Cglycinophilum_AJ3170","Chalotolerans_YIM70093","Chumireducens_DSM45392","Cimitans_DSM44264","Cjeike…	0.140312	0.140312	1.70384	0.140312	0.140312	1.70384	258	0
ERS451417_00618	1717.62.peg.622	NA	NA	NA	1	39	Cargentoratense_DSM44202,"Catypicum_R2070","Caurimucosum_ATCC700975","Cbelfantii_FRC0043","Ccallunae_DSM20147","Ccamporealensis_DSM44610","Cdeserti_GIMN1010","Cdiphtheriae_NCTC11397","Cdoosanense_DSM45436","Cefficiens_YS314","Cepidermidicanis_DSM45586","Cfalsenii_DSM44353","Cglutamicum_ATCC13032","Cglycinophilum_AJ3170","Chalotolerans_YIM70093","Chumireducens_DSM45392","Cimitans_DSM44264","Cjeike…	0.182786	0.105617	1.95651	0.182786	0.105617	1.95651	2	2	1. 0.75742;2. 137;3. 409;4. 158;5. 158;6. 472;7. 260;8. 778;9. 379;10. V;11. GTG	1. 0.74651;2. 282;3. 844;4. 303;5. 303;6. 907;7. 405;8. 1213;9. 814;10. I;11. ATC
ERS451417_00611	1717.62.peg.615	NA	NA	NA	1	5	Cbelfantii_FRC0043,"Cdiphtheriae_NCTC11397","Cepidermidicanis_DSM45586","Cmustelae_DSM45274","Cvitaeruminis_DSM20294"	0.296614	0.296614	2.10327	0.296614	0.296614	2.10327	2050	1	1. 0.47223;2. 7;3. 19;4. 28;5. 20;6. 58;7. 20;8. 58;9. 19;10. D;11. GAC
ERS451417_01162	1717.62.peg.1173	NA	NA	NA	1	37	Cargentoratense_DSM44202,"Catypicum_R2070","Caurimucosum_ATCC700975","Cbelfantii_FRC0043","Ccallunae_DSM20147","Ccamporealensis_DSM44610","Cdeserti_GIMN1010","Cdiphtheriae_NCTC11397","Cdoosanense_DSM45436","Cefficiens_YS314","Cepidermidicanis_DSM45586","Cfalsenii_DSM44353","Cglutamicum_ATCC13032","Cglycinophilum_AJ3170","Chalotolerans_YIM70093","Chumireducens_DSM45392","Cimitans_DSM44264","Cjeike…	0.132463	0.121317	1.94957	0.132463	0.121317	1.94957	1026	1	1. 0.68609;2. 246;3. 736;4. 257;5. 257;6. 769;7. 297;8. 889;9. 658;10. G;11. GGT
ERS451417_02022	1717.62.peg.2027	NA	NA	NA	1	38	Cargentoratense_DSM44202,"Catypicum_R2070","Caurimucosum_ATCC700975","Cbelfantii_FRC0043","Ccallunae_DSM20147","Ccamporealensis_DSM44610","Cdeserti_GIMN1010","Cdiphtheriae_NCTC11397","Cdoosanense_DSM45436","Cefficiens_YS314","Cepidermidicanis_DSM45586","Cfalsenii_DSM44353","Cglutamicum_ATCC13032","Cglycinophilum_AJ3170","Chalotolerans_YIM70093","Chumireducens_DSM45392","Cimitans_DSM44264","Cjeike…	0.136098	0.136098	1.88219	0.136098	0.136098	1.88219	258	0
ERS451417_02397	1717.62.peg.2429	NA	NA	NA	1	38	Cargentoratense_DSM44202,"Catypicum_R2070","Caurimucosum_ATCC700975","Cbelfantii_FRC0043","Ccallunae_DSM20147","Ccamporealensis_DSM44610","Cdeserti_GIMN1010","Cdiphtheriae_NCTC11397","Cdoosanense_DSM45436","Cefficiens_YS314","Cepidermidicanis_DSM45586","Cfalsenii_DSM44353","Cglutamicum_ATCC13032","Cglycinophilum_AJ3170","Chalotolerans_YIM70093","Chumireducens_DSM45392","Cimitans_DSM44264","Cjeike…	0.045622	0.0456122	1.49258	0.0456415	0.045622	1.49257	258	0
ERS451417_00266	1717.62.peg.260	NA	NA	NA	1	3	Cdiphtheriae_NCTC11397,"Crouxii_FRC0190","Csilvaticum_KL0182"	0.581469	0.275218	2.42319	0.429212	0.275228	2.42319	6530	0
ERS451417_01284	1717.62.peg.1292	NA	NA	NA	1	34	Cargentoratense_DSM44202,"Catypicum_R2070","Caurimucosum_ATCC700975","Cbelfantii_FRC0043","Ccallunae_DSM20147","Ccamporealensis_DSM44610","Cdeserti_GIMN1010","Cdiphtheriae_NCTC11397","Cdoosanense_DSM45436","Cefficiens_YS314","Cepidermidicanis_DSM45586","Cglutamicum_ATCC13032","Chalotolerans_YIM70093","Chumireducens_DSM45392","Cjeikeium_K41","Ckroppenstedtii_DSM44385","Ckutscheri_DSM20755","Clacti…	0.12052	0.12052	1.97401	0.12052	0.12052	1.97401	258	0
ERS451417_00737	1717.62.peg.740	NA	NA	NA	1	13	Cbelfantii_FRC0043,"Ccallunae_DSM20147","Cdeserti_GIMN1010","Cdiphtheriae_NCTC11397","Cefficiens_YS314","Cepidermidicanis_DSM45586","Cglutamicum_ATCC13032","Chumireducens_DSM45392","Clactis_RW25","Cmarinum_DSM44953","Cmustelae_DSM45274","Crouxii_FRC0190","Ctestudinoris_DSM44614"	0.0970118	0.092613	1.53689	0.0970118	0.092613	1.53689	2	3	1. 0.43838;2. 114;3. 340;4. 119;5. 114;6. 340;7. 140;8. 418;9. 247;10. A;11. GCG	1. 0.56727;2. 129;3. 385;4. 134;5. 129;6. 385;7. 155;8. 463;9. 292;10. I;11. ATA	1. 0.55893;2. 387;3. 1159;4. 399;5. 390;6. 1168;7. 423;8. 1267;9. 967;10. A;11. GCT
ERS451417_01997	1717.62.peg.2001	NA	NA	NA	1	7	Cbelfantii_FRC0043,"Cdiphtheriae_NCTC11397","Cpseudotuberculosis_31","Cpseudotuberculosis_ATCC19410","Csilvaticum_KL0182","Culcerans_NCTC12077","Culcerans_NCTC7910"	0.381622	0.267995	5.86994	0.381622	0.267995	5.86993	2	2	1. 0.67829;2. 293;3. 877;4. 298;5. 294;6. 880;7. 294;8. 880;9. 667;10. N;11. AAT	1. 0.67504;2. 335;3. 1003;4. 340;5. 336;6. 1006;7. 336;8. 1006;9. 793;10. M;11. ATG
ERS451417_00077	1717.62.peg.74	NA	NA	NA	1	35	Cargentoratense_DSM44202,"Caurimucosum_ATCC700975","Cbelfantii_FRC0043","Ccallunae_DSM20147","Cdeserti_GIMN1010","Cdiphtheriae_NCTC11397","Cdoosanense_DSM45436","Cefficiens_YS314","Cepidermidicanis_DSM45586","Cfalsenii_DSM44353","Cglutamicum_ATCC13032","Cglycinophilum_AJ3170","Chalotolerans_YIM70093","Chumireducens_DSM45392","Cimitans_DSM44264","Cjeikeium_K41","Ckroppenstedtii_DSM44385","Ckutsche…	0.121519	0.121519	1.94987	0.121519	0.121519	1.94988	258	0
ERS451417_01363	1717.62.peg.1371	NA	NA	NA	1	30	Cargentoratense_DSM44202,"Caurimucosum_ATCC700975","Cbelfantii_FRC0043","Ccallunae_DSM20147","Ccamporealensis_DSM44610","Cdeserti_GIMN1010","Cdiphtheriae_NCTC11397","Cdoosanense_DSM45436","Cefficiens_YS314","Cglutamicum_ATCC13032","Cglycinophilum_AJ3170","Chalotolerans_YIM70093","Chumireducens_DSM45392","Cimitans_DSM44264","Ckutscheri_DSM20755","Clactis_RW25","Cmarinum_DSM44953","Cmaris_DSM45190"…	0.257277	0.257277	1.65495	0.257277	0.257277	1.65494	258	0
ERS451417_00566	1717.62.peg.569	NA	NA	NA	1	6	Cbelfantii_FRC0043,"Cdiphtheriae_NCTC11397","Cpseudotuberculosis_31","Cpseudotuberculosis_ATCC19410","Crouxii_FRC0190","Csilvaticum_KL0182"	0.810537	0.499773	3.76102	0.810537	0.499773	3.76102	2	1	1. 0.8332;2. 31;3. 91;4. 31;5. 31;6. 91;7. 31;8. 91;9. 91;10. V;11. GTG
ERS451417_00238	1717.62.peg.234	NA	NA	NA	1	37	Cargentoratense_DSM44202,"Catypicum_R2070","Caurimucosum_ATCC700975","Cbelfantii_FRC0043","Ccallunae_DSM20147","Ccamporealensis_DSM44610","Cdeserti_GIMN1010","Cdiphtheriae_NCTC11397","Cdoosanense_DSM45436","Cepidermidicanis_DSM45586","Cfalsenii_DSM44353","Cglutamicum_ATCC13032","Cglycinophilum_AJ3170","Chalotolerans_YIM70093","Chumireducens_DSM45392","Cimitans_DSM44264","Cjeikeium_K41","Ckroppens…	0.14966	0.14966	1.49498	0.14966	0.14966	1.49498	3074	1	1. 0.46493;2. 101;3. 301;4. 115;5. 113;6. 337;7. 115;8. 343;9. 220;10. I;11. ATC
ERS451417_00937	1717.62.peg.945	NA	NA	NA	1	6	Cbelfantii_FRC0043,"Cdeserti_GIMN1010","Cdiphtheriae_NCTC11397","Cepidermidicanis_DSM45586","Cjeikeium_K41","Cureicelerivorans_IMMIBRIV2301"	0.29193	0.29193	2.15249	0.29193	0.29193	2.15249	3074	1	1. 0.43517;2. 187;3. 559;4. 370;5. 189;6. 565;7. 267;8. 799;9. 319;10. T;11. ACC
ERS451417_01872	1717.62.peg.1874	NA	NA	NA	1	38	Cargentoratense_DSM44202,"Catypicum_R2070","Caurimucosum_ATCC700975","Cbelfantii_FRC0043","Ccallunae_DSM20147","Ccamporealensis_DSM44610","Cdeserti_GIMN1010","Cdiphtheriae_NCTC11397","Cdoosanense_DSM45436","Cefficiens_YS314","Cepidermidicanis_DSM45586","Cfalsenii_DSM44353","Cglutamicum_ATCC13032","Cglycinophilum_AJ3170","Chalotolerans_YIM70093","Chumireducens_DSM45392","Cimitans_DSM44264","Cjeike…	0.0844821	0.0844821	7.37217	0.0844821	0.0844821	7.37222	258	0
ERS451417_00843	1717.62.peg.848	NA	NA	NA	1	39	Cargentoratense_DSM44202,"Catypicum_R2070","Caurimucosum_ATCC700975","Cbelfantii_FRC0043","Ccallunae_DSM20147","Ccamporealensis_DSM44610","Cdeserti_GIMN1010","Cdiphtheriae_NCTC11397","Cdoosanense_DSM45436","Cefficiens_YS314","Cepidermidicanis_DSM45586","Cfalsenii_DSM44353","Cglutamicum_ATCC13032","Cglycinophilum_AJ3170","Chalotolerans_YIM70093","Chumireducens_DSM45392","Cimitans_DSM44264","Cjeike…	0.145812	0.145812	1.8183	0.145812	0.145812	1.8183	258	0
ERS451417_00768	1717.62.peg.773	NA	NA	NA	1	39	Cargentoratense_DSM44202,"Catypicum_R2070","Caurimucosum_ATCC700975","Cbelfantii_FRC0043","Ccallunae_DSM20147","Ccamporealensis_DSM44610","Cdeserti_GIMN1010","Cdiphtheriae_NCTC11397","Cdoosanense_DSM45436","Cefficiens_YS314","Cepidermidicanis_DSM45586","Cfalsenii_DSM44353","Cglutamicum_ATCC13032","Cglycinophilum_AJ3170","Chalotolerans_YIM70093","Chumireducens_DSM45392","Cimitans_DSM44264","Cjeike…	0.0685197	0.0685197	2.05437	0.0685201	0.0685201	2.05437	1026	1	1. 0.5817;2. 199;3. 595;4. 245;5. 245;6. 733;7. 440;8. 1318;9. 526;10. E;11. GAA
ERS451417_01550	1717.62.peg.1559	NA	NA	NA	1	31	Cargentoratense_DSM44202,"Catypicum_R2070","Caurimucosum_ATCC700975","Cbelfantii_FRC0043","Ccallunae_DSM20147","Ccamporealensis_DSM44610","Cdeserti_GIMN1010","Cdiphtheriae_NCTC11397","Cdoosanense_DSM45436","Cefficiens_YS314","Cepidermidicanis_DSM45586","Cglutamicum_ATCC13032","Chalotolerans_YIM70093","Chumireducens_DSM45392","Cimitans_DSM44264","Cjeikeium_K41","Ckroppenstedtii_DSM44385","Ckutsche…	0.383296	0.146904	2.18363	0.383306	0.146904	2.18363	2	1	1. 0.88061;2. 33;3. 97;4. 34;5. 34;6. 100;7. 34;8. 100;9. 94;10. S;11. TCT
ERS451417_01255	1717.62.peg.1263	NA	NA	NA	1	29	Cargentoratense_DSM44202,"Catypicum_R2070","Caurimucosum_ATCC700975","Cbelfantii_FRC0043","Ccamporealensis_DSM44610","Cdiphtheriae_NCTC11397","Cdoosanense_DSM45436","Cepidermidicanis_DSM45586","Chumireducens_DSM45392","Cimitans_DSM44264","Ckroppenstedtii_DSM44385","Ckutscheri_DSM20755","Clactis_RW25","Cmarinum_DSM44953","Cmaris_DSM45190","Cmustelae_DSM45274","Cpseudotuberculosis_31","Cpseudotuber…	0.191377	0.191377	1.82543	0.191377	0.191377	1.82543	2	1	1. 0.5407;2. 341;3. 1021;4. 363;5. 363;6. 1087;7. 375;8. 1123;9. 868;10. A;11. GCC
ERS451417_00771	1717.62.peg.776	NA	NA	NA	1	38	Cargentoratense_DSM44202,"Catypicum_R2070","Caurimucosum_ATCC700975","Cbelfantii_FRC0043","Ccallunae_DSM20147","Ccamporealensis_DSM44610","Cdeserti_GIMN1010","Cdiphtheriae_NCTC11397","Cdoosanense_DSM45436","Cefficiens_YS314","Cepidermidicanis_DSM45586","Cfalsenii_DSM44353","Cglutamicum_ATCC13032","Cglycinophilum_AJ3170","Chalotolerans_YIM70093","Chumireducens_DSM45392","Cimitans_DSM44264","Cjeike…	0.350367	0.133198	2.3053	0.350367	0.133198	2.3053	2050	1	1. 0.82189;2. 112;3. 334;4. 122;5. 122;6. 364;7. 126;8. 376;9. 262;10. A;11. GCG
ERS451417_01080	1717.62.peg.1092	NA	NA	NA	1	4	Ccallunae_DSM20147,"Cdiphtheriae_NCTC11397","Cmustelae_DSM45274","Cvitaeruminis_DSM20294"	0.189869	0.189869	1.43868	0.378277	0.181722	1.40704	4354	0
ERS451417_00788	1717.62.peg.795	NA	NA	NA	1	20	Cbelfantii_FRC0043,"Ccallunae_DSM20147","Cdeserti_GIMN1010","Cdiphtheriae_NCTC11397","Cefficiens_YS314","Cepidermidicanis_DSM45586","Cfalsenii_DSM44353","Cglutamicum_ATCC13032","Cglycinophilum_AJ3170","Cjeikeium_K41","Ckroppenstedtii_DSM44385","Clactis_RW25","Cmustelae_DSM45274","Cpseudotuberculosis_31","Cpseudotuberculosis_ATCC19410","Crouxii_FRC0190","Csilvaticum_KL0182","Cterpenotabidum_Y11","…	0.247004	0.127122	2.45174	0.247004	0.127122	2.45174	3074	1	1. 0.84014;2. 154;3. 460;4. 164;5. 164;6. 490;7. 200;8. 598;9. 325;10. T;11. ACA
ERS451417_02152	1717.62.peg.2175	NA	NA	NA	1	16	Caurimucosum_ATCC700975,"Cbelfantii_FRC0043","Ccamporealensis_DSM44610","Cdiphtheriae_NCTC11397","Cfalsenii_DSM44353","Cjeikeium_K41","Ckutscheri_DSM20755","Clactis_RW25","Cmustelae_DSM45274","Cpseudotuberculosis_31","Cpseudotuberculosis_ATCC19410","Csilvaticum_KL0182","Csingulare_IBSB52218","Culcerans_NCTC12077","Culcerans_NCTC7910","Curealyticum_DSM7109"	0.134049	0.134049	2.23823	0.134049	0.134049	2.23823	258	0
ERS451417_00946	1717.62.peg.953	NA	NA	NA	1	39	Cargentoratense_DSM44202,"Catypicum_R2070","Caurimucosum_ATCC700975","Cbelfantii_FRC0043","Ccallunae_DSM20147","Ccamporealensis_DSM44610","Cdeserti_GIMN1010","Cdiphtheriae_NCTC11397","Cdoosanense_DSM45436","Cefficiens_YS314","Cepidermidicanis_DSM45586","Cfalsenii_DSM44353","Cglutamicum_ATCC13032","Cglycinophilum_AJ3170","Chalotolerans_YIM70093","Chumireducens_DSM45392","Cimitans_DSM44264","Cjeike…	0.148584	0.148584	1.83161	0.148584	0.148584	1.83161	2	1	1. 0.54907;2. 56;3. 166;4. 62;5. 62;6. 184;7. 72;8. 214;9. 103;10. I;11. ATC
ERS451417_02366	1717.62.peg.2396	NA	NA	NA	1	13	Cbelfantii_FRC0043,"Ccallunae_DSM20147","Cdeserti_GIMN1010","Cdiphtheriae_NCTC11397","Cfalsenii_DSM44353","Cglycinophilum_AJ3170","Cimitans_DSM44264","Cjeikeium_K41","Cmarinum_DSM44953","Csimulans_PES1","Cterpenotabidum_Y11","Curealyticum_DSM7109","Cvitaeruminis_DSM20294"	0.155959	0.155959	1.48196	0.155959	0.155959	1.48196	2	1	1. 0.46562;2. 125;3. 373;4. 154;5. 139;6. 415;7. 134;8. 400;9. 325;10. I;11. ATC
ERS451417_01492	1717.62.peg.1500	NA	NA	NA	1	38	Cargentoratense_DSM44202,"Catypicum_R2070","Caurimucosum_ATCC700975","Cbelfantii_FRC0043","Ccallunae_DSM20147","Ccamporealensis_DSM44610","Cdeserti_GIMN1010","Cdiphtheriae_NCTC11397","Cdoosanense_DSM45436","Cefficiens_YS314","Cepidermidicanis_DSM45586","Cfalsenii_DSM44353","Cglutamicum_ATCC13032","Cglycinophilum_AJ3170","Chalotolerans_YIM70093","Chumireducens_DSM45392","Cimitans_DSM44264","Cjeike…	0.145555	0.140883	1.81304	0.145555	0.140882	1.81304	2	2	1. 0.65462;2. 368;3. 1102;4. 501;5. 501;6. 1501;7. 633;8. 1897;9. 943;10. Y;11. TAC	1. 0.64718;2. 644;3. 1930;4. 779;5. 779;6. 2335;7. 911;8. 2731;9. 1771;10. S;11. AGC
ERS451417_01235	1717.62.peg.1243	NA	NA	NA	1	15	Cargentoratense_DSM44202,"Cbelfantii_FRC0043","Cdiphtheriae_NCTC11397","Cepidermidicanis_DSM45586","Ckroppenstedtii_DSM44385","Ckutscheri_DSM20755","Clactis_RW25","Cmustelae_DSM45274","Cpseudotuberculosis_31","Cpseudotuberculosis_ATCC19410","Crouxii_FRC0190","Csilvaticum_KL0182","Culcerans_NCTC12077","Culcerans_NCTC7910","Cvitaeruminis_DSM20294"	0.190828	0.14611	2.61165	0.190828	0.14611	2.61165	2050	1	1. 0.74502;2. 184;3. 550;4. 184;5. 184;6. 550;7. 184;8. 550;9. 382;10. Y;11. TAT
ERS451417_01348	1717.62.peg.1356	NA	NA	NA	1	38	Cargentoratense_DSM44202,"Catypicum_R2070","Caurimucosum_ATCC700975","Cbelfantii_FRC0043","Ccallunae_DSM20147","Ccamporealensis_DSM44610","Cdeserti_GIMN1010","Cdiphtheriae_NCTC11397","Cdoosanense_DSM45436","Cefficiens_YS314","Cepidermidicanis_DSM45586","Cfalsenii_DSM44353","Cglutamicum_ATCC13032","Cglycinophilum_AJ3170","Chalotolerans_YIM70093","Chumireducens_DSM45392","Cimitans_DSM44264","Cjeike…	0.179135	0.179135	1.49489	0.179135	0.179135	1.49489	3074	3	1. 0.45429;2. 166;3. 496;4. 210;5. 210;6. 628;7. 319;8. 955;9. 244;10. A;11. GCG	1. 0.48659;2. 247;3. 739;4. 291;5. 291;6. 871;7. 400;8. 1198;9. 487;10. S;11. AGT	1. 0.53262;2. 336;3. 1006;4. 380;5. 380;6. 1138;7. 489;8. 1465;9. 754;10. L;11. CTT
ERS451417_01651	1717.62.peg.1658	NA	NA	NA	1	37	Cargentoratense_DSM44202,"Catypicum_R2070","Caurimucosum_ATCC700975","Cbelfantii_FRC0043","Ccallunae_DSM20147","Ccamporealensis_DSM44610","Cdeserti_GIMN1010","Cdiphtheriae_NCTC11397","Cdoosanense_DSM45436","Cepidermidicanis_DSM45586","Cfalsenii_DSM44353","Cglutamicum_ATCC13032","Cglycinophilum_AJ3170","Chalotolerans_YIM70093","Chumireducens_DSM45392","Cimitans_DSM44264","Cjeikeium_K41","Ckroppens…	0.178025	0.178025	1.56731	0.178025	0.178025	1.56731	2306	0
ERS451417_00298	1717.62.peg.299	NA	NA	NA	1	38	Cargentoratense_DSM44202,"Catypicum_R2070","Caurimucosum_ATCC700975","Cbelfantii_FRC0043","Ccallunae_DSM20147","Ccamporealensis_DSM44610","Cdeserti_GIMN1010","Cdiphtheriae_NCTC11397","Cdoosanense_DSM45436","Cefficiens_YS314","Cepidermidicanis_DSM45586","Cfalsenii_DSM44353","Cglutamicum_ATCC13032","Cglycinophilum_AJ3170","Chalotolerans_YIM70093","Chumireducens_DSM45392","Cimitans_DSM44264","Cjeike…	0.200553	0.200553	1.73465	0.200553	0.200553	1.73465	1282	0
ERS451417_00680	1717.62.peg.687	NA	NA	NA	1	39	Cargentoratense_DSM44202,"Catypicum_R2070","Caurimucosum_ATCC700975","Cbelfantii_FRC0043","Ccallunae_DSM20147","Ccamporealensis_DSM44610","Cdeserti_GIMN1010","Cdiphtheriae_NCTC11397","Cdoosanense_DSM45436","Cefficiens_YS314","Cepidermidicanis_DSM45586","Cfalsenii_DSM44353","Cglutamicum_ATCC13032","Cglycinophilum_AJ3170","Chalotolerans_YIM70093","Chumireducens_DSM45392","Cimitans_DSM44264","Cjeike…	0.0596073	0.0596073	1.62964	0.0596073	0.0596073	1.62964	2306	0
ERS451417_00069	1717.62.peg.65	NA	NA	NA	1	23	Cargentoratense_DSM44202,"Cbelfantii_FRC0043","Ccallunae_DSM20147","Cdiphtheriae_NCTC11397","Cdoosanense_DSM45436","Cefficiens_YS314","Cfalsenii_DSM44353","Chalotolerans_YIM70093","Chumireducens_DSM45392","Ckroppenstedtii_DSM44385","Ckutscheri_DSM20755","Clactis_RW25","Cmarinum_DSM44953","Cmaris_DSM45190","Cmustelae_DSM45274","Cpseudotuberculosis_31","Cpseudotuberculosis_ATCC19410","Crouxii_FRC01…	0.304281	0.297807	1.66979	0.304281	0.297807	1.66979	3074	1	1. 0.67667;2. 126;3. 376;4. 164;5. 156;6. 466;7. 176;8. 526;9. 250;10. E;11. GAG
ERS451417_00842	1717.62.peg.847	NA	NA	NA	1	39	Cargentoratense_DSM44202,"Catypicum_R2070","Caurimucosum_ATCC700975","Cbelfantii_FRC0043","Ccallunae_DSM20147","Ccamporealensis_DSM44610","Cdeserti_GIMN1010","Cdiphtheriae_NCTC11397","Cdoosanense_DSM45436","Cefficiens_YS314","Cepidermidicanis_DSM45586","Cfalsenii_DSM44353","Cglutamicum_ATCC13032","Cglycinophilum_AJ3170","Chalotolerans_YIM70093","Chumireducens_DSM45392","Cimitans_DSM44264","Cjeike…	0.105136	0.105136	1.8076	0.105136	0.105136	1.80759	258	0
ERS451417_02236	1717.62.peg.2261	NA	NA	NA	1	17	Caurimucosum_ATCC700975,"Cbelfantii_FRC0043","Ccamporealensis_DSM44610","Cdiphtheriae_NCTC11397","Cfalsenii_DSM44353","Cglycinophilum_AJ3170","Chalotolerans_YIM70093","Cjeikeium_K41","Ckroppenstedtii_DSM44385","Clactis_RW25","Cpseudotuberculosis_31","Csilvaticum_KL0182","Csimulans_PES1","Cterpenotabidum_Y11","Culcerans_NCTC12077","Culcerans_NCTC7910","Curealyticum_DSM7109"	0.142503	0.142503	2.13082	0.142503	0.142503	2.13082	1026	2	1. 0.43755;2. 252;3. 754;4. 270;5. 268;6. 802;7. 448;8. 1342;9. 568;10. I;11. ATC	1. 0.433;2. 696;3. 2086;4. 725;5. 719;6. 2155;7. 921;8. 2761;9. 1789;10. I;11. ATC
ERS451417_00403	1717.62.peg.403	NA	NA	NA	1	38	Cargentoratense_DSM44202,"Catypicum_R2070","Caurimucosum_ATCC700975","Cbelfantii_FRC0043","Ccallunae_DSM20147","Ccamporealensis_DSM44610","Cdeserti_GIMN1010","Cdiphtheriae_NCTC11397","Cdoosanense_DSM45436","Cefficiens_YS314","Cepidermidicanis_DSM45586","Cfalsenii_DSM44353","Cglutamicum_ATCC13032","Cglycinophilum_AJ3170","Chalotolerans_YIM70093","Chumireducens_DSM45392","Cimitans_DSM44264","Cjeike…	0.0943873	0.0943873	1.92007	0.0943873	0.0943873	1.92007	258	0
ERS451417_01196	1717.62.peg.1205	NA	NA	NA	1	12	Caurimucosum_ATCC700975,"Ccamporealensis_DSM44610","Cdiphtheriae_NCTC11397","Cepidermidicanis_DSM45586","Cpseudotuberculosis_31","Cpseudotuberculosis_ATCC19410","Crouxii_FRC0190","Csilvaticum_KL0182","Csimulans_PES1","Csingulare_IBSB52218","Culcerans_NCTC12077","Culcerans_NCTC7910"	0.997714	0.112862	2.89677	0.188262	0.113491	2.87938	4096	4	1. 0.91056;2. 167;3. 499;4. 167;5. 167;6. 499;7. 167;8. 499;9. 496;10. T;11. ACT	1. 0.87553;2. 173;3. 517;4. 173;5. 173;6. 517;7. 173;8. 517;9. 514;10. Q;11. CAG	1. 0.83425;2. 226;3. 676;4. 226;5. 226;6. 676;7. 226;8. 676;9. 673;10. D;11. GAT	1. 0.93996;2. 426;3. 1276;4. 426;5. 426;6. 1276;7. 426;8. 1276;9. 1270;10. S;11. TCT
ERS451417_02148	1717.62.peg.2170	NA	NA	NA	1	8	Cbelfantii_FRC0043,"Cdiphtheriae_NCTC11397","Clactis_RW25","Cpseudotuberculosis_31","Cpseudotuberculosis_ATCC19410","Csilvaticum_KL0182","Culcerans_NCTC12077","Culcerans_NCTC7910"	1	0.0846839	2.34003	1	0.0846839	2.34005	3072	3	1. 0.49099;2. 29;3. 85;4. 118;5. 42;6. 124;7. 42;8. 124;9. 40;10. L;11. CTC	1. 0.74348;2. 136;3. 406;4. 247;5. 165;6. 493;7. 177;8. 529;9. 268;10. N;11. AAT	1. 0.56146;2. 184;3. 550;4. 296;5. 214;6. 640;7. 226;8. 676;9. 412;10. H;11. CAC
ERS451417_00361	1717.62.peg.360	NA	NA	NA	1	39	Cargentoratense_DSM44202,"Catypicum_R2070","Caurimucosum_ATCC700975","Cbelfantii_FRC0043","Ccallunae_DSM20147","Ccamporealensis_DSM44610","Cdeserti_GIMN1010","Cdiphtheriae_NCTC11397","Cdoosanense_DSM45436","Cefficiens_YS314","Cepidermidicanis_DSM45586","Cfalsenii_DSM44353","Cglutamicum_ATCC13032","Cglycinophilum_AJ3170","Chalotolerans_YIM70093","Chumireducens_DSM45392","Cimitans_DSM44264","Cjeike…	0.160282	0.160282	1.65322	0.160282	0.160282	1.65321	258	0
ERS451417_01950	1717.62.peg.1950	NA	NA	NA	1	38	Cargentoratense_DSM44202,"Catypicum_R2070","Caurimucosum_ATCC700975","Cbelfantii_FRC0043","Ccallunae_DSM20147","Ccamporealensis_DSM44610","Cdeserti_GIMN1010","Cdiphtheriae_NCTC11397","Cdoosanense_DSM45436","Cefficiens_YS314","Cepidermidicanis_DSM45586","Cfalsenii_DSM44353","Cglutamicum_ATCC13032","Cglycinophilum_AJ3170","Chalotolerans_YIM70093","Chumireducens_DSM45392","Cimitans_DSM44264","Cjeike…	0.148927	0.148927	1.59943	0.148927	0.148927	1.59943	258	0
ERS451417_02140	1717.62.peg.2160	NA	NA	NA	1	32	Caurimucosum_ATCC700975,"Cbelfantii_FRC0043","Ccallunae_DSM20147","Cdeserti_GIMN1010","Cdiphtheriae_NCTC11397","Cdoosanense_DSM45436","Cefficiens_YS314","Cepidermidicanis_DSM45586","Cfalsenii_DSM44353","Cglutamicum_ATCC13032","Cglycinophilum_AJ3170","Chalotolerans_YIM70093","Chumireducens_DSM45392","Cimitans_DSM44264","Cjeikeium_K41","Ckutscheri_DSM20755","Clactis_RW25","Cmarinum_DSM44953","Cmari…	0.112259	0.112259	1.66174	0.112259	0.112259	1.66174	2306	0
ERS451417_01180	1717.62.peg.1189	NA	NA	NA	1	39	Cargentoratense_DSM44202,"Catypicum_R2070","Caurimucosum_ATCC700975","Cbelfantii_FRC0043","Ccallunae_DSM20147","Ccamporealensis_DSM44610","Cdeserti_GIMN1010","Cdiphtheriae_NCTC11397","Cdoosanense_DSM45436","Cefficiens_YS314","Cepidermidicanis_DSM45586","Cfalsenii_DSM44353","Cglutamicum_ATCC13032","Cglycinophilum_AJ3170","Chalotolerans_YIM70093","Chumireducens_DSM45392","Cimitans_DSM44264","Cjeike…	0.312162	0.221441	1.71952	0.294033	0.221478	1.71975	2050	3	1. 0.7919;2. 196;3. 586;4. 210;5. 210;6. 628;7. 237;8. 709;9. 394;10. V;11. GTA	1. 0.77863;2. 228;3. 682;4. 242;5. 242;6. 724;7. 269;8. 805;9. 490;10. N;11. AAT	1. 0.78687;2. 332;3. 994;4. 355;5. 355;6. 1063;7. 385;8. 1153;9. 778;10. I;11. ATA
ERS451417_00634	1717.62.peg.638	NA	NA	NA	1	39	Cargentoratense_DSM44202,"Catypicum_R2070","Caurimucosum_ATCC700975","Cbelfantii_FRC0043","Ccallunae_DSM20147","Ccamporealensis_DSM44610","Cdeserti_GIMN1010","Cdiphtheriae_NCTC11397","Cdoosanense_DSM45436","Cefficiens_YS314","Cepidermidicanis_DSM45586","Cfalsenii_DSM44353","Cglutamicum_ATCC13032","Cglycinophilum_AJ3170","Chalotolerans_YIM70093","Chumireducens_DSM45392","Cimitans_DSM44264","Cjeike…	0.120161	0.120161	1.67322	0.120161	0.120161	1.67322	2	2	1. 0.64153;2. 228;3. 682;4. 262;5. 262;6. 784;7. 278;8. 832;9. 607;10. E;11. GAA	1. 0.67881;2. 427;3. 1279;4. 461;5. 461;6. 1381;7. 477;8. 1429;9. 1204;10. T;11. ACA
ERS451417_00386	1717.62.peg.386	NA	NA	NA	1	11	Cargentoratense_DSM44202,"Catypicum_R2070","Cbelfantii_FRC0043","Cdiphtheriae_NCTC11397","Cpseudotuberculosis_31","Cpseudotuberculosis_ATCC19410","Crouxii_FRC0190","Csilvaticum_KL0182","Culcerans_NCTC12077","Culcerans_NCTC7910","Cuterequi_DSM45634"	0.201503	0.201503	2.59493	0.201503	0.201503	2.59492	258	0
ERS451417_00593	1717.62.peg.597	NA	NA	NA	1	24	Cargentoratense_DSM44202,"Catypicum_R2070","Cbelfantii_FRC0043","Ccallunae_DSM20147","Cdeserti_GIMN1010","Cdiphtheriae_NCTC11397","Cefficiens_YS314","Cepidermidicanis_DSM45586","Cfalsenii_DSM44353","Cglutamicum_ATCC13032","Cglycinophilum_AJ3170","Ckroppenstedtii_DSM44385","Ckutscheri_DSM20755","Clactis_RW25","Cmustelae_DSM45274","Cpseudotuberculosis_31","Cpseudotuberculosis_ATCC19410","Crouxii_FR…	0.0390919	0.0390919	2.15437	0.0390919	0.0390919	2.15437	2306	0
ERS451417_01781	1717.62.peg.1786	NA	NA	NA	1	11	Cbelfantii_FRC0043,"Cdiphtheriae_NCTC11397","Chalotolerans_YIM70093","Ckutscheri_DSM20755","Cmustelae_DSM45274","Cpseudotuberculosis_31","Cpseudotuberculosis_ATCC19410","Csilvaticum_KL0182","Culcerans_NCTC12077","Culcerans_NCTC7910","Cvitaeruminis_DSM20294"	0.142974	0.142974	2.14768	0.142974	0.142964	2.14768	3330	0
ERS451417_02368	1717.62.peg.2398	NA	NA	NA	1	7	Cbelfantii_FRC0043,"Cdiphtheriae_NCTC11397","Cfalsenii_DSM44353","Cglycinophilum_AJ3170","Cjeikeium_K41","Cterpenotabidum_Y11","Curealyticum_DSM7109"	1	0.231073	1.77857	1	0.231073	1.77857	2048	2	1. 0.87361;2. 216;3. 646;4. 245;5. 220;6. 658;7. 244;8. 730;9. 445;10. S;11. AGT	1. 0.59235;2. 227;3. 679;4. 256;5. 231;6. 691;7. 255;8. 763;9. 478;10. T;11. ACG
ERS451417_00038	1717.62.peg.34	NA	NA	NA	1	31	Cargentoratense_DSM44202,"Caurimucosum_ATCC700975","Cbelfantii_FRC0043","Ccallunae_DSM20147","Cdeserti_GIMN1010","Cdiphtheriae_NCTC11397","Cefficiens_YS314","Cepidermidicanis_DSM45586","Cfalsenii_DSM44353","Cglutamicum_ATCC13032","Cglycinophilum_AJ3170","Chalotolerans_YIM70093","Chumireducens_DSM45392","Cimitans_DSM44264","Cjeikeium_K41","Ckroppenstedtii_DSM44385","Clactis_RW25","Cmarinum_DSM4495…	0.189561	0.189561	2.21129	0.189561	0.189561	2.21131	1026	1	1. 0.53597;2. 6;3. 16;4. 39;5. 39;6. 115;7. 65;8. 193;9. 4;10. H;11. CAC
ERS451417_01826	1717.62.peg.1831	NA	NA	NA	1	14	Cbelfantii_FRC0043,"Ccallunae_DSM20147","Cdeserti_GIMN1010","Cdiphtheriae_NCTC11397","Cdoosanense_DSM45436","Cglutamicum_ATCC13032","Clactis_RW25","Cpseudotuberculosis_31","Cpseudotuberculosis_ATCC19410","Csilvaticum_KL0182","Csimulans_PES1","Culcerans_NCTC12077","Culcerans_NCTC7910","Cuterequi_DSM45634"	0.133957	0.133957	1.59434	0.135205	0.133968	1.59434	3330	0
ERS451417_00399	1717.62.peg.399	NA	NA	NA	1	39	Cargentoratense_DSM44202,"Catypicum_R2070","Caurimucosum_ATCC700975","Cbelfantii_FRC0043","Ccallunae_DSM20147","Ccamporealensis_DSM44610","Cdeserti_GIMN1010","Cdiphtheriae_NCTC11397","Cdoosanense_DSM45436","Cefficiens_YS314","Cepidermidicanis_DSM45586","Cfalsenii_DSM44353","Cglutamicum_ATCC13032","Cglycinophilum_AJ3170","Chalotolerans_YIM70093","Chumireducens_DSM45392","Cimitans_DSM44264","Cjeike…	0.230315	0.151015	1.85826	0.230315	0.151014	1.85826	2	1	1. 0.71487;2. 135;3. 403;4. 135;5. 135;6. 403;7. 135;8. 403;9. 343;10. S;11. AGC
ERS451417_02005	1717.62.peg.2009	NA	NA	NA	1	13	Caurimucosum_ATCC700975,"Cbelfantii_FRC0043","Cdiphtheriae_NCTC11397","Cglycinophilum_AJ3170","Cjeikeium_K41","Cpseudotuberculosis_31","Cpseudotuberculosis_ATCC19410","Csilvaticum_KL0182","Csimulans_PES1","Csingulare_IBSB52218","Culcerans_NCTC12077","Culcerans_NCTC7910","Curealyticum_DSM7109"	1	0.142924	1.99579	1	0.142924	1.99579	3072	2	1. 0.9545;2. 116;3. 346;4. 152;5. 119;6. 355;7. 138;8. 412;9. 253;10. E;11. GAA	1. 0.9549;2. 158;3. 472;4. 194;5. 161;6. 481;7. 180;8. 538;9. 379;10. F;11. TTT
ERS451417_00789	1717.62.peg.796	NA	NA	NA	1	20	Catypicum_R2070,"Cbelfantii_FRC0043","Ccallunae_DSM20147","Cdeserti_GIMN1010","Cdiphtheriae_NCTC11397","Cdoosanense_DSM45436","Cefficiens_YS314","Cglutamicum_ATCC13032","Chalotolerans_YIM70093","Chumireducens_DSM45392","Ckutscheri_DSM20755","Cmarinum_DSM44953","Cmaris_DSM45190","Cmustelae_DSM45274","Crouxii_FRC0190","Csilvaticum_KL0182","Ctestudinoris_DSM44614","Culcerans_NCTC12077","Culcerans_NC…	0.329076	0.326432	1.50203	0.329076	0.326432	1.50203	2050	1	1. 0.68083;2. 175;3. 523;4. 600;5. 200;6. 598;7. 215;8. 643;9. 325;10. A;11. GCC
ERS451417_00567	1717.62.peg.570	NA	NA	NA	1	39	Cargentoratense_DSM44202,"Catypicum_R2070","Caurimucosum_ATCC700975","Cbelfantii_FRC0043","Ccallunae_DSM20147","Ccamporealensis_DSM44610","Cdeserti_GIMN1010","Cdiphtheriae_NCTC11397","Cdoosanense_DSM45436","Cefficiens_YS314","Cepidermidicanis_DSM45586","Cfalsenii_DSM44353","Cglutamicum_ATCC13032","Cglycinophilum_AJ3170","Chalotolerans_YIM70093","Chumireducens_DSM45392","Cimitans_DSM44264","Cjeike…	0.126625	0.0844097	1.54539	0.126615	0.0844092	1.54539	2	3	1. 0.60192;2. 62;3. 184;4. 82;5. 82;6. 244;7. 149;8. 445;9. 142;10. N;11. AAC	1. 0.59375;2. 202;3. 604;4. 222;5. 222;6. 664;7. 289;8. 865;9. 562;10. E;11. GAA	1. 0.59246;2. 263;3. 787;4. 283;5. 283;6. 847;7. 350;8. 1048;9. 745;10. M;11. ATG
ERS451417_01216	1717.62.peg.1224	NA	NA	NA	1	39	Cargentoratense_DSM44202,"Catypicum_R2070","Caurimucosum_ATCC700975","Cbelfantii_FRC0043","Ccallunae_DSM20147","Ccamporealensis_DSM44610","Cdeserti_GIMN1010","Cdiphtheriae_NCTC11397","Cdoosanense_DSM45436","Cefficiens_YS314","Cepidermidicanis_DSM45586","Cfalsenii_DSM44353","Cglutamicum_ATCC13032","Cglycinophilum_AJ3170","Chalotolerans_YIM70093","Chumireducens_DSM45392","Cimitans_DSM44264","Cjeike…	0.318417	0.214102	1.79652	0.318427	0.214111	1.79652	1026	1	1. 0.84098;2. 299;3. 895;4. 311;5. 311;6. 931;7. 314;8. 940;9. 790;10. V;11. GTA
ERS451417_02313	1717.62.peg.2340	NA	NA	NA	1	38	Cargentoratense_DSM44202,"Catypicum_R2070","Caurimucosum_ATCC700975","Cbelfantii_FRC0043","Ccallunae_DSM20147","Ccamporealensis_DSM44610","Cdeserti_GIMN1010","Cdiphtheriae_NCTC11397","Cdoosanense_DSM45436","Cefficiens_YS314","Cepidermidicanis_DSM45586","Cfalsenii_DSM44353","Cglutamicum_ATCC13032","Cglycinophilum_AJ3170","Chalotolerans_YIM70093","Chumireducens_DSM45392","Cimitans_DSM44264","Cjeike…	0.314837	0.263044	1.6488	0.314837	0.263044	1.6488	2	1	1. 0.73113;2. 23;3. 67;4. 23;5. 23;6. 67;7. 23;8. 67;9. 67;10. N;11. AAC
ERS451417_00854	1717.62.peg.859	NA	NA	NA	1	18	Ccallunae_DSM20147,"Cdeserti_GIMN1010","Cdiphtheriae_NCTC11397","Cefficiens_YS314","Cglutamicum_ATCC13032","Chalotolerans_YIM70093","Chumireducens_DSM45392","Clactis_RW25","Cmarinum_DSM44953","Cmaris_DSM45190","Cmustelae_DSM45274","Cpseudotuberculosis_31","Cpseudotuberculosis_ATCC19410","Crouxii_FRC0190","Ctestudinoris_DSM44614","Culcerans_NCTC12077","Culcerans_NCTC7910","Cvitaeruminis_DSM20294"	0.257071	0.257071	1.65811	0.257071	0.257071	1.65811	6146	1	1. 0.46663;2. 35;3. 103;4. 47;5. 38;6. 112;7. 38;8. 112;9. 88;10. F;11. TTT
ERS451417_00799	1717.62.peg.805	NA	NA	NA	1	7	Cbelfantii_FRC0043,"Cdiphtheriae_NCTC11397","Cpseudotuberculosis_31","Cpseudotuberculosis_ATCC19410","Crouxii_FRC0190","Culcerans_NCTC12077","Culcerans_NCTC7910"	0.0913189	0.0913189	2.21481	0.0913189	0.0913189	2.21481	2	1	1. 0.61958;2. 364;3. 1090;4. 619;5. 397;6. 1189;7. 430;8. 1288;9. 1090;10. S;11. TCG
ERS451417_02009	1717.62.peg.2014	NA	NA	NA	1	20	Caurimucosum_ATCC700975,"Cbelfantii_FRC0043","Ccallunae_DSM20147","Ccamporealensis_DSM44610","Cdeserti_GIMN1010","Cdiphtheriae_NCTC11397","Cdoosanense_DSM45436","Cefficiens_YS314","Cglutamicum_ATCC13032","Chalotolerans_YIM70093","Chumireducens_DSM45392","Cimitans_DSM44264","Cmarinum_DSM44953","Cmaris_DSM45190","Cmustelae_DSM45274","Csimulans_PES1","Csingulare_IBSB52218","Ctestudinoris_DSM44614","…	0.0622513	0.0621836	1.80628	0.99999	0.0613502	1.81055	3330	0
ERS451417_01665	1717.62.peg.1672	NA	NA	NA	1	38	Cargentoratense_DSM44202,"Catypicum_R2070","Caurimucosum_ATCC700975","Cbelfantii_FRC0043","Ccallunae_DSM20147","Ccamporealensis_DSM44610","Cdeserti_GIMN1010","Cdiphtheriae_NCTC11397","Cdoosanense_DSM45436","Cefficiens_YS314","Cepidermidicanis_DSM45586","Cfalsenii_DSM44353","Cglutamicum_ATCC13032","Cglycinophilum_AJ3170","Chalotolerans_YIM70093","Chumireducens_DSM45392","Cimitans_DSM44264","Cjeike…	0.106786	0.106786	1.8165	0.106786	0.106786	1.8165	258	0
ERS451417_01223	1717.62.peg.1231	NA	NA	NA	1	5	Ccallunae_DSM20147,"Cdiphtheriae_NCTC11397","Chalotolerans_YIM70093","Cpseudotuberculosis_ATCC19410","Crouxii_FRC0190"	1	0.400259	1.59429	1	0.400259	1.59429	4096	1	1. 0.60507;2. 24;3. 70;4. 25;5. 25;6. 73;7. 25;8. 73;9. 70;10. V;11. GTT
ERS451417_01009	1717.62.peg.1020	NA	NA	NA	1	39	Cargentoratense_DSM44202,"Catypicum_R2070","Caurimucosum_ATCC700975","Cbelfantii_FRC0043","Ccallunae_DSM20147","Ccamporealensis_DSM44610","Cdeserti_GIMN1010","Cdiphtheriae_NCTC11397","Cdoosanense_DSM45436","Cefficiens_YS314","Cepidermidicanis_DSM45586","Cfalsenii_DSM44353","Cglutamicum_ATCC13032","Cglycinophilum_AJ3170","Chalotolerans_YIM70093","Chumireducens_DSM45392","Cimitans_DSM44264","Cjeike…	0.113809	0.113809	1.44042	0.113809	0.113809	1.44041	258	0
ERS451417_01991	1717.62.peg.1992	NA	NA	NA	1	20	Catypicum_R2070,"Caurimucosum_ATCC700975","Cbelfantii_FRC0043","Cdiphtheriae_NCTC11397","Cfalsenii_DSM44353","Chumireducens_DSM45392","Ckroppenstedtii_DSM44385","Ckutscheri_DSM20755","Clactis_RW25","Cmustelae_DSM45274","Cpseudotuberculosis_31","Cpseudotuberculosis_ATCC19410","CriegeliiPUDD83A45","Csilvaticum_KL0182","Cterpenotabidum_Y11","Ctestudinoris_DSM44614","Culcerans_NCTC12077","Culcerans_N…	0.243005	0.243005	1.82111	0.243005	0.243005	1.82111	258	0
ERS451417_01232	1717.62.peg.1240	NA	NA	NA	1	15	Cargentoratense_DSM44202,"Cbelfantii_FRC0043","Cdiphtheriae_NCTC11397","Cepidermidicanis_DSM45586","Ckroppenstedtii_DSM44385","Ckutscheri_DSM20755","Clactis_RW25","Cmustelae_DSM45274","Cpseudotuberculosis_31","Cpseudotuberculosis_ATCC19410","Crouxii_FRC0190","Csilvaticum_KL0182","Culcerans_NCTC12077","Culcerans_NCTC7910","Cvitaeruminis_DSM20294"	0.22995	0.22671	2.17446	0.229951	0.22671	2.17446	2	1	1. 0.6268;2. 22;3. 64;4. 40;5. 40;6. 118;7. 48;8. 142;9. 52;10. D;11. GAC
ERS451417_00288	1717.62.peg.289	NA	NA	NA	1	25	Catypicum_R2070,"Cbelfantii_FRC0043","Ccallunae_DSM20147","Cdeserti_GIMN1010","Cdiphtheriae_NCTC11397","Cefficiens_YS314","Cepidermidicanis_DSM45586","Cglutamicum_ATCC13032","Chalotolerans_YIM70093","Chumireducens_DSM45392","Cimitans_DSM44264","Ckutscheri_DSM20755","Clactis_RW25","Cmarinum_DSM44953","Cmaris_DSM45190","Cmustelae_DSM45274","Cpseudotuberculosis_31","Cpseudotuberculosis_ATCC19410","C…	0.23493	0.23493	1.59449	0.23493	0.23493	1.59449	3074	2	1. 0.58231;2. 213;3. 637;4. 246;5. 246;6. 736;7. 303;8. 907;9. 490;10. V;11. GTG	1. 0.60901;2. 493;3. 1477;4. 556;5. 556;6. 1666;7. 665;8. 1993;9. 1036;10. V;11. GTT
ERS451417_00671	1717.62.peg.678	NA	NA	NA	1	16	Cargentoratense_DSM44202,"Cbelfantii_FRC0043","Cdiphtheriae_NCTC11397","Cefficiens_YS314","Cepidermidicanis_DSM45586","Ckroppenstedtii_DSM44385","Ckutscheri_DSM20755","Clactis_RW25","Cmustelae_DSM45274","Cpseudotuberculosis_31","Cpseudotuberculosis_ATCC19410","Crouxii_FRC0190","Csilvaticum_KL0182","Culcerans_NCTC12077","Culcerans_NCTC7910","Cvitaeruminis_DSM20294"	0.0908722	0.0908722	2.74168	0.0908722	0.0908722	2.74175	258	0
ERS451417_00986	1717.62.peg.997	NA	NA	NA	1	39	Cargentoratense_DSM44202,"Catypicum_R2070","Caurimucosum_ATCC700975","Cbelfantii_FRC0043","Ccallunae_DSM20147","Ccamporealensis_DSM44610","Cdeserti_GIMN1010","Cdiphtheriae_NCTC11397","Cdoosanense_DSM45436","Cefficiens_YS314","Cepidermidicanis_DSM45586","Cfalsenii_DSM44353","Cglutamicum_ATCC13032","Cglycinophilum_AJ3170","Chalotolerans_YIM70093","Chumireducens_DSM45392","Cimitans_DSM44264","Cjeike…	0.384376	0.182625	1.64122	0.384376	0.182625	1.64122	1026	3	1. 0.78179;2. 64;3. 190;4. 110;5. 110;6. 328;7. 312;8. 934;9. 157;10. G;11. GGG	1. 0.77416;2. 240;3. 718;4. 302;5. 302;6. 904;7. 524;8. 1570;9. 580;10. E;11. GAG	1. 0.57013;2. 550;3. 1648;4. 640;5. 640;6. 1918;7. 866;8. 2596;9. 1483;10. E;11. GAG
ERS451417_00497	1717.62.peg.501	NA	NA	NA	1	39	Cargentoratense_DSM44202,"Catypicum_R2070","Caurimucosum_ATCC700975","Cbelfantii_FRC0043","Ccallunae_DSM20147","Ccamporealensis_DSM44610","Cdeserti_GIMN1010","Cdiphtheriae_NCTC11397","Cdoosanense_DSM45436","Cefficiens_YS314","Cepidermidicanis_DSM45586","Cfalsenii_DSM44353","Cglutamicum_ATCC13032","Cglycinophilum_AJ3170","Chalotolerans_YIM70093","Chumireducens_DSM45392","Cimitans_DSM44264","Cjeike…	0.200644	0.197061	1.72698	0.200644	0.197061	1.72698	2	2	1. 0.59535;2. 32;3. 94;4. 55;5. 55;6. 163;7. 91;8. 271;9. 73;10. S;11. TCA	1. 0.54652;2. 303;3. 907;4. 326;5. 326;6. 976;7. 363;8. 1087;9. 856;10. S;11. TCC
ERS451417_00104	1717.62.peg.102	NA	NA	NA	1	12	Cbelfantii_FRC0043,"Cdeserti_GIMN1010","Cdiphtheriae_NCTC11397","Cefficiens_YS314","Chalotolerans_YIM70093","Cpseudotuberculosis_31","Cpseudotuberculosis_ATCC19410","Crouxii_FRC0190","Csilvaticum_KL0182","Culcerans_NCTC12077","Culcerans_NCTC7910","Cvitaeruminis_DSM20294"	0.218845	0.218845	2.10918	0.218845	0.218845	2.10918	258	0
ERS451417_01702	1717.62.peg.1708	NA	NA	NA	1	5	Cbelfantii_FRC0043,"Cdiphtheriae_NCTC11397","Cglycinophilum_AJ3170","Csingulare_IBSB52218","Cterpenotabidum_Y11"	1	0.234695	1.91808	1	0.234695	1.91808	3072	3	1. 0.8888;2. 542;3. 1624;4. 579;5. 574;6. 1720;7. 651;8. 1951;9. 1069;10. N;11. AAC	1. 0.57612;2. 667;3. 1999;4. 704;5. 699;6. 2095;7. 779;8. 2335;9. 1399;10. T;11. ACA	1. 0.48369;2. 749;3. 2245;4. 818;5. 782;6. 2344;7. 864;8. 2590;9. 1585;10. Q;11. CAG
ERS451417_01022	1717.62.peg.1035	NA	NA	NA	1	39	Cargentoratense_DSM44202,"Catypicum_R2070","Caurimucosum_ATCC700975","Cbelfantii_FRC0043","Ccallunae_DSM20147","Ccamporealensis_DSM44610","Cdeserti_GIMN1010","Cdiphtheriae_NCTC11397","Cdoosanense_DSM45436","Cefficiens_YS314","Cepidermidicanis_DSM45586","Cfalsenii_DSM44353","Cglutamicum_ATCC13032","Cglycinophilum_AJ3170","Chalotolerans_YIM70093","Chumireducens_DSM45392","Cimitans_DSM44264","Cjeike…	0.0863729	0.0863729	1.82305	0.0863729	0.0863729	1.82305	2306	0
ERS451417_00872	1717.62.peg.878	NA	NA	NA	1	39	Cargentoratense_DSM44202,"Catypicum_R2070","Caurimucosum_ATCC700975","Cbelfantii_FRC0043","Ccallunae_DSM20147","Ccamporealensis_DSM44610","Cdeserti_GIMN1010","Cdiphtheriae_NCTC11397","Cdoosanense_DSM45436","Cefficiens_YS314","Cepidermidicanis_DSM45586","Cfalsenii_DSM44353","Cglutamicum_ATCC13032","Cglycinophilum_AJ3170","Chalotolerans_YIM70093","Chumireducens_DSM45392","Cimitans_DSM44264","Cjeike…	0.135516	0.135516	1.92009	0.135516	0.135516	1.92009	2	1	1. 0.66583;2. 167;3. 499;4. 169;5. 169;6. 505;7. 169;8. 505;9. 487;10. A;11. GCG
ERS451417_00075	1717.62.peg.72	NA	NA	NA	1	10	Cbelfantii_FRC0043,"Cdiphtheriae_NCTC11397","Cepidermidicanis_DSM45586","Clactis_RW25","Cpseudotuberculosis_31","Cpseudotuberculosis_ATCC19410","Crouxii_FRC0190","Csilvaticum_KL0182","Culcerans_NCTC12077","Culcerans_NCTC7910"	0.0931251	0.0931251	3.76123	0.0931251	0.0931251	3.76127	258	0
ERS451417_00889	1717.62.peg.895	NA	NA	NA	1	6	Cbelfantii_FRC0043,"Cdiphtheriae_NCTC11397","Cpseudotuberculosis_ATCC19410","Crouxii_FRC0190","Csilvaticum_KL0182","Culcerans_NCTC12077"	0.21867	0.21867	2.90726	0.21867	0.21867	2.90726	258	0
ERS451417_00508	1717.62.peg.512	NA	NA	NA	1	34	Cargentoratense_DSM44202,"Catypicum_R2070","Caurimucosum_ATCC700975","Cbelfantii_FRC0043","Ccallunae_DSM20147","Ccamporealensis_DSM44610","Cdeserti_GIMN1010","Cdiphtheriae_NCTC11397","Cdoosanense_DSM45436","Cefficiens_YS314","Cepidermidicanis_DSM45586","Cglutamicum_ATCC13032","Chalotolerans_YIM70093","Chumireducens_DSM45392","Cimitans_DSM44264","Ckroppenstedtii_DSM44385","Ckutscheri_DSM20755","Cl…	0.144895	0.125696	1.97943	0.144895	0.125696	1.97943	2050	1	1. 0.69536;2. 297;3. 889;4. 882;5. 337;6. 1009;7. 373;8. 1117;9. 685;10. S;11. AGC
ERS451417_00951	1717.62.peg.958	NA	NA	NA	1	39	Cargentoratense_DSM44202,"Catypicum_R2070","Caurimucosum_ATCC700975","Cbelfantii_FRC0043","Ccallunae_DSM20147","Ccamporealensis_DSM44610","Cdeserti_GIMN1010","Cdiphtheriae_NCTC11397","Cdoosanense_DSM45436","Cefficiens_YS314","Cepidermidicanis_DSM45586","Cfalsenii_DSM44353","Cglutamicum_ATCC13032","Cglycinophilum_AJ3170","Chalotolerans_YIM70093","Chumireducens_DSM45392","Cimitans_DSM44264","Cjeike…	0.112406	0.104202	1.59665	0.112406	0.104202	1.59665	2	1	1. 0.72273;2. 166;3. 496;4. 185;5. 185;6. 553;7. 190;8. 568;9. 481;10. L;11. CTA
ERS451417_01549	1717.62.peg.1558	NA	NA	NA	1	23	Cargentoratense_DSM44202,"Caurimucosum_ATCC700975","Cbelfantii_FRC0043","Ccallunae_DSM20147","Ccamporealensis_DSM44610","Cdeserti_GIMN1010","Cdiphtheriae_NCTC11397","Cefficiens_YS314","Cglutamicum_ATCC13032","Chalotolerans_YIM70093","Chumireducens_DSM45392","Ckutscheri_DSM20755","Cmarinum_DSM44953","Cpseudotuberculosis_31","Cpseudotuberculosis_ATCC19410","Csilvaticum_KL0182","Csimulans_PES1","Csi…	0.386074	0.127131	1.64417	0.386065	0.127131	1.64417	2050	7	1. 0.68121;2. 46;3. 136;4. 83;5. 83;6. 247;7. 86;8. 256;9. 37;10. S;11. AGT	1. 0.59969;2. 50;3. 148;4. 87;5. 87;6. 259;7. 90;8. 268;9. 49;10. I;11. ATT	1. 0.86725;2. 188;3. 562;4. 229;5. 229;6. 685;7. 241;8. 721;9. 421;10. S;11. AGT	1. 0.76787;2. 278;3. 832;4. 324;5. 324;6. 970;7. 343;8. 1027;9. 643;10. E;11. GAA	1. 0.47596;2. 362;3. 1084;4. 409;5. 409;6. 1225;7. 429;8. 1285;9. 844;10. V;11. GTA	1. 0.52916;2. 670;3. 2008;4. 742;5. 737;6. 2209;7. 838;8. 2512;9. 1480;10. H;11. CAC	1. 0.85302;2. 681;3. 2041;4. 753;5. 748;6. 2242;7. 849;8. 2545;9. 1513;10. A;11. GCG
ERS451417_00681	1717.62.peg.688	NA	NA	NA	1	39	Cargentoratense_DSM44202,"Catypicum_R2070","Caurimucosum_ATCC700975","Cbelfantii_FRC0043","Ccallunae_DSM20147","Ccamporealensis_DSM44610","Cdeserti_GIMN1010","Cdiphtheriae_NCTC11397","Cdoosanense_DSM45436","Cefficiens_YS314","Cepidermidicanis_DSM45586","Cfalsenii_DSM44353","Cglutamicum_ATCC13032","Cglycinophilum_AJ3170","Chalotolerans_YIM70093","Chumireducens_DSM45392","Cimitans_DSM44264","Cjeike…	0.137177	0.137177	1.71338	0.137177	0.137177	1.71338	258	0
ERS451417_00989	1717.62.peg.1000	NA	NA	NA	1	39	Cargentoratense_DSM44202,"Catypicum_R2070","Caurimucosum_ATCC700975","Cbelfantii_FRC0043","Ccallunae_DSM20147","Ccamporealensis_DSM44610","Cdeserti_GIMN1010","Cdiphtheriae_NCTC11397","Cdoosanense_DSM45436","Cefficiens_YS314","Cepidermidicanis_DSM45586","Cfalsenii_DSM44353","Cglutamicum_ATCC13032","Cglycinophilum_AJ3170","Chalotolerans_YIM70093","Chumireducens_DSM45392","Cimitans_DSM44264","Cjeike…	0.12504	0.12504	1.73471	0.12504	0.12504	1.73471	2	2	1. 0.53362;2. 56;3. 166;4. 65;5. 65;6. 193;7. 102;8. 304;9. 121;10. V;11. GTT	1. 0.63173;2. 409;3. 1225;4. 419;5. 419;6. 1255;7. 460;8. 1378;9. 1135;10. D;11. GAC
ERS451417_00365	1717.62.peg.364	NA	NA	NA	1	22	Catypicum_R2070,"Caurimucosum_ATCC700975","Cbelfantii_FRC0043","Ccamporealensis_DSM44610","Cdiphtheriae_NCTC11397","Cepidermidicanis_DSM45586","Cimitans_DSM44264","Cjeikeium_K41","Ckutscheri_DSM20755","Clactis_RW25","Cmustelae_DSM45274","Cpseudotuberculosis_31","Cpseudotuberculosis_ATCC19410","CriegeliiPUDD83A45","Crouxii_FRC0190","Csilvaticum_KL0182","Csimulans_PES1","Csingulare_IBSB52218","Ctes…	0.171573	0.171573	2.00928	0.171573	0.171573	2.00928	1282	0
ERS451417_00225	1717.62.peg.221	NA	NA	NA	1	32	Cargentoratense_DSM44202,"Catypicum_R2070","Caurimucosum_ATCC700975","Cbelfantii_FRC0043","Ccallunae_DSM20147","Ccamporealensis_DSM44610","Cdeserti_GIMN1010","Cdiphtheriae_NCTC11397","Cefficiens_YS314","Cepidermidicanis_DSM45586","Cglutamicum_ATCC13032","Chalotolerans_YIM70093","Chumireducens_DSM45392","Cimitans_DSM44264","Ckroppenstedtii_DSM44385","Ckutscheri_DSM20755","Clactis_RW25","Cmarinum_D…	0.160702	0.160702	1.74336	0.160702	0.160702	1.74336	1282	0
ERS451417_01305	1717.62.peg.1313	NA	NA	NA	1	28	Cargentoratense_DSM44202,"Caurimucosum_ATCC700975","Cbelfantii_FRC0043","Ccallunae_DSM20147","Cdeserti_GIMN1010","Cdiphtheriae_NCTC11397","Cdoosanense_DSM45436","Cefficiens_YS314","Cepidermidicanis_DSM45586","Cfalsenii_DSM44353","Cglutamicum_ATCC13032","Chalotolerans_YIM70093","Chumireducens_DSM45392","Cjeikeium_K41","Clactis_RW25","Cmarinum_DSM44953","Cmaris_DSM45190","Cmustelae_DSM45274","Cpseu…	0.189563	0.189563	1.6528	0.189563	0.189563	1.6528	3330	0
ERS451417_00542	1717.62.peg.546	NA	NA	NA	1	38	Cargentoratense_DSM44202,"Catypicum_R2070","Caurimucosum_ATCC700975","Cbelfantii_FRC0043","Ccallunae_DSM20147","Ccamporealensis_DSM44610","Cdeserti_GIMN1010","Cdiphtheriae_NCTC11397","Cdoosanense_DSM45436","Cefficiens_YS314","Cepidermidicanis_DSM45586","Cfalsenii_DSM44353","Cglutamicum_ATCC13032","Chalotolerans_YIM70093","Chumireducens_DSM45392","Cimitans_DSM44264","Cjeikeium_K41","Ckroppenstedti…	0.302889	0.302889	1.59949	0.302889	0.302889	1.59949	3330	0
ERS451417_00541	1717.62.peg.545	NA	NA	NA	1	9	Cbelfantii_FRC0043,"Cdiphtheriae_NCTC11397","Cglycinophilum_AJ3170","Cpseudotuberculosis_31","Cpseudotuberculosis_ATCC19410","Crouxii_FRC0190","Csilvaticum_KL0182","Culcerans_NCTC12077","Culcerans_NCTC7910"	0.0742911	0.0742911	2.51627	0.0742911	0.0742911	2.51627	2	3	1. 0.47039;2. 159;3. 475;4. 163;5. 163;6. 487;7. 173;8. 517;9. 370;10. T;11. ACC	1. 0.56933;2. 177;3. 529;4. 181;5. 181;6. 541;7. 191;8. 571;9. 424;10. I;11. ATC	1. 0.46789;2. 187;3. 559;4. 191;5. 191;6. 571;7. 201;8. 601;9. 454;10. A;11. GCG
ERS451417_00861	1717.62.peg.866	NA	NA	NA	1	31	Cargentoratense_DSM44202,"Catypicum_R2070","Caurimucosum_ATCC700975","Cbelfantii_FRC0043","Ccallunae_DSM20147","Ccamporealensis_DSM44610","Cdeserti_GIMN1010","Cdiphtheriae_NCTC11397","Cdoosanense_DSM45436","Cefficiens_YS314","Cepidermidicanis_DSM45586","Cfalsenii_DSM44353","Cglutamicum_ATCC13032","Cglycinophilum_AJ3170","Chumireducens_DSM45392","Cimitans_DSM44264","Ckroppenstedtii_DSM44385","Ckut…	0.105454	0.105454	1.88655	0.105454	0.105454	1.88655	258	0
ERS451417_00636	1717.62.peg.640	NA	NA	NA	1	38	Cargentoratense_DSM44202,"Catypicum_R2070","Caurimucosum_ATCC700975","Cbelfantii_FRC0043","Ccallunae_DSM20147","Ccamporealensis_DSM44610","Cdeserti_GIMN1010","Cdiphtheriae_NCTC11397","Cdoosanense_DSM45436","Cefficiens_YS314","Cepidermidicanis_DSM45586","Cglutamicum_ATCC13032","Cglycinophilum_AJ3170","Chalotolerans_YIM70093","Chumireducens_DSM45392","Cimitans_DSM44264","Cjeikeium_K41","Ckroppenste…	0.294497	0.045343	1.59271	0.294507	0.0453433	1.59271	2	1	1. 0.81139;2. 118;3. 352;4. 131;5. 131;6. 391;7. 131;8. 391;9. 310;10. H;11. CAT
ERS451417_00487	1717.62.peg.490	NA	NA	NA	1	17	Cbelfantii_FRC0043,"Ccallunae_DSM20147","Cdeserti_GIMN1010","Cdiphtheriae_NCTC11397","Cglutamicum_ATCC13032","Chalotolerans_YIM70093","Chumireducens_DSM45392","Cmarinum_DSM44953","Cmaris_DSM45190","Cpseudotuberculosis_31","Cpseudotuberculosis_ATCC19410","Crouxii_FRC0190","Csilvaticum_KL0182","Ctestudinoris_DSM44614","Culcerans_NCTC12077","Culcerans_NCTC7910","Cvitaeruminis_DSM20294"	0.312686	0.312686	2.44785	0.312686	0.312686	2.44785	258	0
ERS451417_02233	1717.62.peg.2258	NA	NA	NA	1	38	Cargentoratense_DSM44202,"Catypicum_R2070","Caurimucosum_ATCC700975","Cbelfantii_FRC0043","Ccallunae_DSM20147","Ccamporealensis_DSM44610","Cdeserti_GIMN1010","Cdiphtheriae_NCTC11397","Cdoosanense_DSM45436","Cefficiens_YS314","Cepidermidicanis_DSM45586","Cfalsenii_DSM44353","Cglutamicum_ATCC13032","Cglycinophilum_AJ3170","Chalotolerans_YIM70093","Chumireducens_DSM45392","Cimitans_DSM44264","Cjeike…	0.157401	0.157401	1.6488	0.157401	0.157401	1.6488	1282	0
ERS451417_01838	1717.62.peg.1841	NA	NA	NA	1	4	Cbelfantii_FRC0043,"Cdiphtheriae_NCTC11397","Cglycinophilum_AJ3170","Csingulare_IBSB52218"	0.134693	0.134693	1.23471	0.134702	0.134702	1.23471	1282	0
ERS451417_00712	1717.62.peg.717	NA	NA	NA	1	39	Cargentoratense_DSM44202,"Catypicum_R2070","Caurimucosum_ATCC700975","Cbelfantii_FRC0043","Ccallunae_DSM20147","Ccamporealensis_DSM44610","Cdeserti_GIMN1010","Cdiphtheriae_NCTC11397","Cdoosanense_DSM45436","Cefficiens_YS314","Cepidermidicanis_DSM45586","Cfalsenii_DSM44353","Cglutamicum_ATCC13032","Cglycinophilum_AJ3170","Chalotolerans_YIM70093","Chumireducens_DSM45392","Cimitans_DSM44264","Cjeike…	0.159182	0.159182	1.49291	0.159182	0.159182	1.49291	258	0
ERS451417_01013	1717.62.peg.1024	NA	NA	NA	1	3	Cbelfantii_FRC0043,"Cdiphtheriae_NCTC11397","Crouxii_FRC0190"	0.31622	0.210361	5.27253	0.31622	0.210361	5.27253	130	5	1. 0.41314;2. 299;3. 895;4. 364;5. 306;6. 916;7. 306;8. 916;9. 895;10. Y;11. TAT	1. 0.41337;2. 327;3. 979;4. 414;5. 334;6. 1000;7. 334;8. 1000;9. 979;10. D;11. GAC	1. 0.40502;2. 367;3. 1099;4. 454;5. 374;6. 1120;7. 374;8. 1120;9. 1099;10. P;11. CCA	1. 0.43959;2. 409;3. 1225;4. 502;5. 416;6. 1246;7. 416;8. 1246;9. 1225;10. L;11. CTA	1. 0.41069;2. 416;3. 1246;4. 509;5. 423;6. 1267;7. 423;8. 1267;9. 1246;10. V;11. GTA
ERS451417_01799	1717.62.peg.1804	NA	NA	NA	1	38	Cargentoratense_DSM44202,"Catypicum_R2070","Caurimucosum_ATCC700975","Cbelfantii_FRC0043","Ccallunae_DSM20147","Ccamporealensis_DSM44610","Cdeserti_GIMN1010","Cdiphtheriae_NCTC11397","Cdoosanense_DSM45436","Cefficiens_YS314","Cepidermidicanis_DSM45586","Cfalsenii_DSM44353","Cglutamicum_ATCC13032","Cglycinophilum_AJ3170","Chalotolerans_YIM70093","Chumireducens_DSM45392","Cimitans_DSM44264","Cjeike…	0.156483	0.156473	2.08717	0.156503	0.156473	2.08717	258	0
ERS451417_02105	1717.62.peg.2119	NA	NA	NA	1	3	Cdiphtheriae_NCTC11397,"Csimulans_PES1","Csingulare_IBSB52218"	1	1		1	1		4480	0
ERS451417_00870	1717.62.peg.875	NA	NA	NA	1	32	Cargentoratense_DSM44202,"Catypicum_R2070","Caurimucosum_ATCC700975","Cbelfantii_FRC0043","Ccallunae_DSM20147","Ccamporealensis_DSM44610","Cdeserti_GIMN1010","Cdiphtheriae_NCTC11397","Cdoosanense_DSM45436","Cefficiens_YS314","Cepidermidicanis_DSM45586","Cglutamicum_ATCC13032","Chalotolerans_YIM70093","Chumireducens_DSM45392","Cimitans_DSM44264","Ckutscheri_DSM20755","Cmarinum_DSM44953","Cmaris_DS…	0.0986036	0.0986036	1.82729	0.0986036	0.0986036	1.82729	2306	0
ERS451417_02234	1717.62.peg.2259	NA	NA	NA	1	6	Cbelfantii_FRC0043,"Cdiphtheriae_NCTC11397","Cpseudotuberculosis_31","Cpseudotuberculosis_ATCC19410","Culcerans_NCTC12077","Culcerans_NCTC7910"	0.402881	0.402881	4.03748	0.402881	0.402881	4.03749	258	0
ERS451417_00659	1717.62.peg.663	NA	NA	NA	1	28	Catypicum_R2070,"Caurimucosum_ATCC700975","Cbelfantii_FRC0043","Ccallunae_DSM20147","Ccamporealensis_DSM44610","Cdeserti_GIMN1010","Cdiphtheriae_NCTC11397","Cdoosanense_DSM45436","Cepidermidicanis_DSM45586","Cglutamicum_ATCC13032","Chalotolerans_YIM70093","Chumireducens_DSM45392","Cimitans_DSM44264","Cmarinum_DSM44953","Cmaris_DSM45190","Cmustelae_DSM45274","Cpseudotuberculosis_31","Cpseudotuberc…	0.269452	0.269452	1.59204	0.269452	0.269452	1.59204	3330	0
ERS451417_00274	1717.62.peg.271	NA	NA	NA	1	6	Cdiphtheriae_NCTC11397,"Chumireducens_DSM45392","CriegeliiPUDD83A45","Crouxii_FRC0190","Csingulare_IBSB52218","Ctestudinoris_DSM44614"	0.252752	0.252675	1.6741	0.252849	0.252675	1.6741	4354	0
ERS451417_00739	1717.62.peg.742	NA	NA	NA	1	39	Cargentoratense_DSM44202,"Catypicum_R2070","Caurimucosum_ATCC700975","Cbelfantii_FRC0043","Ccallunae_DSM20147","Ccamporealensis_DSM44610","Cdeserti_GIMN1010","Cdiphtheriae_NCTC11397","Cdoosanense_DSM45436","Cefficiens_YS314","Cepidermidicanis_DSM45586","Cfalsenii_DSM44353","Cglutamicum_ATCC13032","Cglycinophilum_AJ3170","Chalotolerans_YIM70093","Chumireducens_DSM45392","Cimitans_DSM44264","Cjeike…	0.177449	0.177449	1.79294	0.177468	0.177449	1.79294	2	1	1. 0.59359;2. 248;3. 742;4. 286;5. 286;6. 856;7. 340;8. 1018;9. 607;10. D;11. GAC
ERS451417_01764	1717.62.peg.1766	NA	NA	NA	1	13	Cbelfantii_FRC0043,"Cdiphtheriae_NCTC11397","Cglycinophilum_AJ3170","Chalotolerans_YIM70093","Ckutscheri_DSM20755","Cmustelae_DSM45274","Cpseudotuberculosis_31","Cpseudotuberculosis_ATCC19410","Csilvaticum_KL0182","Cterpenotabidum_Y11","Culcerans_NCTC12077","Culcerans_NCTC7910","Cvitaeruminis_DSM20294"	0.641746	0.249274	1.78051	0.641746	0.249274	1.78051	1026	4	1. 0.68416;2. 47;3. 139;4. 68;5. 61;6. 181;7. 94;8. 280;9. 88;10. A;11. GCG	1. 0.85385;2. 65;3. 193;4. 90;5. 79;6. 235;7. 112;8. 334;9. 142;10. S;11. TCC	1. 0.55698;2. 143;3. 427;4. 202;5. 169;6. 505;7. 202;8. 604;9. 352;10. V;11. GTC	1. 0.59814;2. 151;3. 451;4. 210;5. 177;6. 529;7. 210;8. 628;9. 376;10. S;11. TCG
ERS451417_01631	1717.62.peg.1638	NA	NA	NA	1	7	Caurimucosum_ATCC700975,"Cdiphtheriae_NCTC11397","Cefficiens_YS314","Cepidermidicanis_DSM45586","Cglutamicum_ATCC13032","Cjeikeium_K41","Csimulans_PES1"	0.190347	0.190347	2.05782	0.190347	0.190347	2.05782	4098	2	1. 0.46449;2. 12;3. 34;4. 17;5. 15;6. 43;7. 15;8. 43;9. 25;10. C;11. TGC	1. 0.45181;2. 272;3. 814;4. 329;5. 275;6. 823;7. 275;8. 823;9. 802;10. F;11. TTC
ERS451417_00387	1717.62.peg.387	NA	NA	NA	1	11	Cbelfantii_FRC0043,"Cdiphtheriae_NCTC11397","Cepidermidicanis_DSM45586","Cmarinum_DSM44953","Cpseudotuberculosis_31","Cpseudotuberculosis_ATCC19410","Crouxii_FRC0190","Csilvaticum_KL0182","Ctestudinoris_DSM44614","Culcerans_NCTC12077","Culcerans_NCTC7910"	0.284245	0.284245	1.72998	0.284245	0.284245	1.72998	1282	0
ERS451417_02194	1717.62.peg.2220	NA	NA	NA	1	4	Cargentoratense_DSM44202,"Cbelfantii_FRC0043","Cdiphtheriae_NCTC11397","Clactis_RW25"	0.282758	0.200338	3.1009	0.282758	0.200338	3.1009	2	6	1. 0.54272;2. 24;3. 70;4. 26;5. 26;6. 76;7. 32;8. 94;9. 10;10. T;11. ACA	1. 0.46201;2. 119;3. 355;4. 121;5. 121;6. 361;7. 127;8. 379;9. 295;10. V;11. GTG	1. 0.44779;2. 144;3. 430;4. 147;5. 146;6. 436;7. 152;8. 454;9. 370;10. T;11. ACC	1. 0.51909;2. 146;3. 436;4. 149;5. 148;6. 442;7. 154;8. 460;9. 376;10. T;11. ACC	1. 0.43023;2. 196;3. 586;4. 199;5. 198;6. 592;7. 204;8. 610;9. 526;10. P;11. CCC	1. 0.5962;2. 234;3. 700;4. 237;5. 236;6. 706;7. 242;8. 724;9. 640;10. S;11. AGC
ERS451417_01234	1717.62.peg.1242	NA	NA	NA	1	15	Cargentoratense_DSM44202,"Cbelfantii_FRC0043","Cdiphtheriae_NCTC11397","Cepidermidicanis_DSM45586","Ckroppenstedtii_DSM44385","Ckutscheri_DSM20755","Clactis_RW25","Cmustelae_DSM45274","Cpseudotuberculosis_31","Cpseudotuberculosis_ATCC19410","Crouxii_FRC0190","Csilvaticum_KL0182","Culcerans_NCTC12077","Culcerans_NCTC7910","Cvitaeruminis_DSM20294"	0.278915	0.175612	2.36576	0.278923	0.17562	2.36576	2	2	1. 0.71101;2. 12;3. 34;4. 14;5. 14;6. 40;7. 14;8. 40;9. 28;10. A;11. GCT	1. 0.70632;2. 21;3. 61;4. 23;5. 23;6. 67;7. 23;8. 67;9. 55;10. V;11. GTT
ERS451417_01493	1717.62.peg.1501	NA	NA	NA	1	38	Cargentoratense_DSM44202,"Catypicum_R2070","Caurimucosum_ATCC700975","Cbelfantii_FRC0043","Ccallunae_DSM20147","Ccamporealensis_DSM44610","Cdeserti_GIMN1010","Cdiphtheriae_NCTC11397","Cdoosanense_DSM45436","Cefficiens_YS314","Cepidermidicanis_DSM45586","Cfalsenii_DSM44353","Cglutamicum_ATCC13032","Cglycinophilum_AJ3170","Chalotolerans_YIM70093","Chumireducens_DSM45392","Cimitans_DSM44264","Cjeike…	0.565759	0.195056	2.2387	0.321993	0.195066	2.2387	258	0
ERS451417_02108	1717.62.peg.2123	NA	NA	NA	1	3	Cdiphtheriae_NCTC11397,"Csimulans_PES1","Csingulare_IBSB52218"	0.573817	0.250561	2.01672	0	0	0.0001	4482	0
ERS451417_01759	1717.62.peg.1762	NA	NA	NA	1	30	Cargentoratense_DSM44202,"Caurimucosum_ATCC700975","Cbelfantii_FRC0043","Ccallunae_DSM20147","Ccamporealensis_DSM44610","Cdeserti_GIMN1010","Cdiphtheriae_NCTC11397","Cdoosanense_DSM45436","Cefficiens_YS314","Cepidermidicanis_DSM45586","Cglutamicum_ATCC13032","Chalotolerans_YIM70093","Chumireducens_DSM45392","Cimitans_DSM44264","Ckroppenstedtii_DSM44385","Ckutscheri_DSM20755","Cmarinum_DSM44953","…	0.13155	0.13155	1.61212	0.13155	0.13155	1.61212	3074	1	1. 0.61915;2. 71;3. 211;4. 79;5. 79;6. 235;7. 116;8. 346;9. 157;10. N;11. AAT
ERS451417_02019	1717.62.peg.2024	NA	NA	NA	1	38	Cargentoratense_DSM44202,"Catypicum_R2070","Caurimucosum_ATCC700975","Cbelfantii_FRC0043","Ccallunae_DSM20147","Ccamporealensis_DSM44610","Cdeserti_GIMN1010","Cdiphtheriae_NCTC11397","Cdoosanense_DSM45436","Cefficiens_YS314","Cepidermidicanis_DSM45586","Cfalsenii_DSM44353","Cglutamicum_ATCC13032","Cglycinophilum_AJ3170","Chalotolerans_YIM70093","Chumireducens_DSM45392","Cimitans_DSM44264","Cjeike…	0.153118	0.153118	1.88193	0.153118	0.153118	1.88193	258	0
ERS451417_00718	1717.62.peg.723	NA	NA	NA	1	29	Cargentoratense_DSM44202,"Caurimucosum_ATCC700975","Cbelfantii_FRC0043","Ccallunae_DSM20147","Ccamporealensis_DSM44610","Cdeserti_GIMN1010","Cdiphtheriae_NCTC11397","Cdoosanense_DSM45436","Cefficiens_YS314","Cepidermidicanis_DSM45586","Cglutamicum_ATCC13032","Chalotolerans_YIM70093","Chumireducens_DSM45392","Cimitans_DSM44264","Cmarinum_DSM44953","Cmaris_DSM45190","Cmustelae_DSM45274","Cpseudotub…	0.283196	0.283196	1.72486	0.283196	0.283196	1.72486	2050	1	1. 0.54133;2. 44;3. 130;4. 45;5. 45;6. 133;7. 49;8. 145;9. 70;10. V;11. GTC
ERS451417_01640	1717.62.peg.1647	NA	NA	NA	1	38	Cargentoratense_DSM44202,"Catypicum_R2070","Caurimucosum_ATCC700975","Cbelfantii_FRC0043","Ccallunae_DSM20147","Ccamporealensis_DSM44610","Cdeserti_GIMN1010","Cdiphtheriae_NCTC11397","Cdoosanense_DSM45436","Cefficiens_YS314","Cepidermidicanis_DSM45586","Cfalsenii_DSM44353","Cglutamicum_ATCC13032","Cglycinophilum_AJ3170","Chalotolerans_YIM70093","Chumireducens_DSM45392","Cimitans_DSM44264","Cjeike…	0.132144	0.119513	1.75281	0.132144	0.119513	1.75281	2	2	1. 0.65997;2. 78;3. 232;4. 91;5. 91;6. 271;7. 96;8. 286;9. 142;10. R;11. AGG	1. 0.67937;2. 187;3. 559;4. 200;5. 200;6. 598;7. 205;8. 613;9. 469;10. A;11. GCT
ERS451417_00216	1717.62.peg.213	NA	NA	NA	1	23	Catypicum_R2070,"Cbelfantii_FRC0043","Ccallunae_DSM20147","Ccamporealensis_DSM44610","Cdeserti_GIMN1010","Cdiphtheriae_NCTC11397","Cdoosanense_DSM45436","Cglutamicum_ATCC13032","Chumireducens_DSM45392","Cimitans_DSM44264","Ckutscheri_DSM20755","Cmarinum_DSM44953","Cmustelae_DSM45274","Cpseudotuberculosis_31","Cpseudotuberculosis_ATCC19410","CriegeliiPUDD83A45","Crouxii_FRC0190","Csilvaticum_KL018…	0.207749	0.207749	1.33602	0.207749	0.207749	1.33601	258	0
ERS451417_01329	1717.62.peg.1337	NA	NA	NA	1	38	Cargentoratense_DSM44202,"Catypicum_R2070","Caurimucosum_ATCC700975","Cbelfantii_FRC0043","Ccallunae_DSM20147","Ccamporealensis_DSM44610","Cdeserti_GIMN1010","Cdiphtheriae_NCTC11397","Cdoosanense_DSM45436","Cefficiens_YS314","Cepidermidicanis_DSM45586","Cfalsenii_DSM44353","Cglutamicum_ATCC13032","Cglycinophilum_AJ3170","Chalotolerans_YIM70093","Chumireducens_DSM45392","Cimitans_DSM44264","Cjeike…	0.301893	0.0896303	1.93736	0.178052	0.0896303	1.93736	258	0
ERS451417_01530	1717.62.peg.1539	NA	NA	NA	1	38	Cargentoratense_DSM44202,"Catypicum_R2070","Caurimucosum_ATCC700975","Cbelfantii_FRC0043","Ccallunae_DSM20147","Ccamporealensis_DSM44610","Cdeserti_GIMN1010","Cdiphtheriae_NCTC11397","Cdoosanense_DSM45436","Cefficiens_YS314","Cepidermidicanis_DSM45586","Cfalsenii_DSM44353","Cglutamicum_ATCC13032","Cglycinophilum_AJ3170","Chalotolerans_YIM70093","Chumireducens_DSM45392","Cimitans_DSM44264","Cjeike…	0.140861	0.140861	1.58417	0.140861	0.140861	1.58417	258	0
ERS451417_01498	1717.62.peg.1506	NA	NA	NA	1	34	Cargentoratense_DSM44202,"Catypicum_R2070","Caurimucosum_ATCC700975","Cbelfantii_FRC0043","Ccallunae_DSM20147","Ccamporealensis_DSM44610","Cdeserti_GIMN1010","Cdiphtheriae_NCTC11397","Cdoosanense_DSM45436","Cefficiens_YS314","Cepidermidicanis_DSM45586","Cglutamicum_ATCC13032","Cglycinophilum_AJ3170","Chalotolerans_YIM70093","Chumireducens_DSM45392","Cimitans_DSM44264","Cjeikeium_K41","Ckutscheri_…	0.202022	0.202022	1.74695	0.202022	0.202022	1.74695	1282	0
ERS451417_01829	1717.62.peg.1833	NA	NA	NA	1	25	Catypicum_R2070,"Caurimucosum_ATCC700975","Cbelfantii_FRC0043","Ccallunae_DSM20147","Ccamporealensis_DSM44610","Cdeserti_GIMN1010","Cdiphtheriae_NCTC11397","Cdoosanense_DSM45436","Cefficiens_YS314","Cglutamicum_ATCC13032","Cglycinophilum_AJ3170","Chalotolerans_YIM70093","Chumireducens_DSM45392","Cimitans_DSM44264","Cmaris_DSM45190","Cpseudotuberculosis_31","Cpseudotuberculosis_ATCC19410","Csilvat…	0.245449	0.245449	1.87104	0.245449	0.245449	1.87104	3330	0
ERS451417_01655	1717.62.peg.1662	NA	NA	NA	1	38	Cargentoratense_DSM44202,"Catypicum_R2070","Caurimucosum_ATCC700975","Cbelfantii_FRC0043","Ccallunae_DSM20147","Ccamporealensis_DSM44610","Cdeserti_GIMN1010","Cdiphtheriae_NCTC11397","Cdoosanense_DSM45436","Cefficiens_YS314","Cepidermidicanis_DSM45586","Cfalsenii_DSM44353","Cglutamicum_ATCC13032","Cglycinophilum_AJ3170","Chalotolerans_YIM70093","Chumireducens_DSM45392","Cimitans_DSM44264","Cjeike…	0.215328	0.141947	1.71793	0.215347	0.141947	1.71794	2	1	1. 0.76581;2. 44;3. 130;4. 55;5. 55;6. 163;7. 59;8. 175;9. 106;10. S;11. TCT
ERS451417_02200	1717.62.peg.2226	NA	NA	NA	1	6	Cbelfantii_FRC0043,"Cdiphtheriae_NCTC11397","Cefficiens_YS314","Chumireducens_DSM45392","Cmarinum_DSM44953","Ctestudinoris_DSM44614"	1	0.176868	1.93077	1	0.176868	1.93077	2048	4	1. 0.4605;2. 95;3. 283;4. 151;5. 119;6. 355;7. 131;8. 391;9. 217;10. V;11. GTC	1. 0.86427;2. 112;3. 334;4. 168;5. 136;6. 406;7. 148;8. 442;9. 268;10. V;11. GTT	1. 0.40774;2. 151;3. 451;4. 237;5. 190;6. 568;7. 208;8. 622;9. 364;10. V;11. GTG	1. 0.41882;2. 159;3. 475;4. 245;5. 198;6. 592;7. 216;8. 646;9. 388;10. G;11. GGC
ERS451417_01340	1717.62.peg.1348	NA	NA	NA	1	38	Cargentoratense_DSM44202,"Catypicum_R2070","Caurimucosum_ATCC700975","Cbelfantii_FRC0043","Ccallunae_DSM20147","Ccamporealensis_DSM44610","Cdeserti_GIMN1010","Cdiphtheriae_NCTC11397","Cdoosanense_DSM45436","Cefficiens_YS314","Cepidermidicanis_DSM45586","Cfalsenii_DSM44353","Cglutamicum_ATCC13032","Cglycinophilum_AJ3170","Chalotolerans_YIM70093","Chumireducens_DSM45392","Cimitans_DSM44264","Cjeike…	0.0941656	0.0941656	1.74799	0.0941656	0.0941656	1.748	258	0
ERS451417_01495	1717.62.peg.1503	NA	NA	NA	1	37	Cargentoratense_DSM44202,"Catypicum_R2070","Caurimucosum_ATCC700975","Cbelfantii_FRC0043","Ccallunae_DSM20147","Ccamporealensis_DSM44610","Cdeserti_GIMN1010","Cdiphtheriae_NCTC11397","Cdoosanense_DSM45436","Cefficiens_YS314","Cepidermidicanis_DSM45586","Cfalsenii_DSM44353","Cglutamicum_ATCC13032","Cglycinophilum_AJ3170","Chalotolerans_YIM70093","Chumireducens_DSM45392","Cimitans_DSM44264","Cjeike…	0.25083	0.25083	1.62826	0.25083	0.25083	1.62826	3074	1	1. 0.59506;2. 179;3. 535;4. 201;5. 201;6. 601;7. 233;8. 697;9. 355;10. N;11. AAT
ERS451417_00807	1717.62.peg.814	NA	NA	NA	1	23	Catypicum_R2070,"Caurimucosum_ATCC700975","Cbelfantii_FRC0043","Ccallunae_DSM20147","Ccamporealensis_DSM44610","Cdeserti_GIMN1010","Cdiphtheriae_NCTC11397","Cdoosanense_DSM45436","Cefficiens_YS314","Cepidermidicanis_DSM45586","Cglutamicum_ATCC13032","Chalotolerans_YIM70093","Chumireducens_DSM45392","Cmarinum_DSM44953","Cmaris_DSM45190","Cpseudotuberculosis_ATCC19410","Crouxii_FRC0190","Csilvaticu…	0.371316	0.371316	1.9245	0.371316	0.371316	1.9245	2306	0
ERS451417_00858	1717.62.peg.863	NA	NA	NA	1	35	Cargentoratense_DSM44202,"Catypicum_R2070","Caurimucosum_ATCC700975","Cbelfantii_FRC0043","Ccallunae_DSM20147","Ccamporealensis_DSM44610","Cdeserti_GIMN1010","Cdiphtheriae_NCTC11397","Cdoosanense_DSM45436","Cefficiens_YS314","Cepidermidicanis_DSM45586","Cfalsenii_DSM44353","Cglutamicum_ATCC13032","Chalotolerans_YIM70093","Chumireducens_DSM45392","Cimitans_DSM44264","Ckroppenstedtii_DSM44385","Cku…	0.490575	0.088064	1.60636	0.490594	0.0880644	1.60636	2	1	1. 0.89098;2. 174;3. 520;4. 207;5. 207;6. 619;7. 227;8. 679;9. 463;10. V;11. GTT
ERS451417_01014	1717.62.peg.1025	NA	NA	NA	1	38	Cargentoratense_DSM44202,"Catypicum_R2070","Caurimucosum_ATCC700975","Cbelfantii_FRC0043","Ccallunae_DSM20147","Ccamporealensis_DSM44610","Cdeserti_GIMN1010","Cdiphtheriae_NCTC11397","Cdoosanense_DSM45436","Cefficiens_YS314","Cepidermidicanis_DSM45586","Cfalsenii_DSM44353","Cglutamicum_ATCC13032","Cglycinophilum_AJ3170","Chalotolerans_YIM70093","Chumireducens_DSM45392","Cimitans_DSM44264","Cjeike…	0.213063	0.207093	1.80407	0.213063	0.207093	1.80407	2	3	1. 0.54673;2. 168;3. 502;4. 208;5. 208;6. 622;7. 224;8. 670;9. 220;10. A;11. GCG	1. 0.58277;2. 194;3. 580;4. 235;5. 235;6. 703;7. 251;8. 751;9. 295;10. S;11. TCG	1. 0.56936;2. 508;3. 1522;4. 550;5. 550;6. 1648;7. 566;8. 1696;9. 1231;10. I;11. ATT
ERS451417_01278	1717.62.peg.1286	NA	NA	NA	1	23	Catypicum_R2070,"Ccallunae_DSM20147","Cdeserti_GIMN1010","Cdiphtheriae_NCTC11397","Cdoosanense_DSM45436","Cefficiens_YS314","Cglutamicum_ATCC13032","Chalotolerans_YIM70093","Chumireducens_DSM45392","Ckutscheri_DSM20755","Cmarinum_DSM44953","Cmaris_DSM45190","Cmustelae_DSM45274","Cpseudotuberculosis_31","Cpseudotuberculosis_ATCC19410","CriegeliiPUDD83A45","Crouxii_FRC0190","Csilvaticum_KL0182","Ct…	1.28337	0.260919	1.7622	0.44385	0.260918	1.7622	4352	0
ERS451417_01864	1717.62.peg.1866	NA	NA	NA	1	38	Cargentoratense_DSM44202,"Catypicum_R2070","Caurimucosum_ATCC700975","Cbelfantii_FRC0043","Ccallunae_DSM20147","Ccamporealensis_DSM44610","Cdeserti_GIMN1010","Cdiphtheriae_NCTC11397","Cdoosanense_DSM45436","Cefficiens_YS314","Cepidermidicanis_DSM45586","Cfalsenii_DSM44353","Cglutamicum_ATCC13032","Cglycinophilum_AJ3170","Chalotolerans_YIM70093","Chumireducens_DSM45392","Cimitans_DSM44264","Cjeike…	0.0995232	0.0995232	1.91486	0.0995232	0.0995232	1.91486	3330	0
ERS451417_00608	1717.62.peg.612	NA	NA	NA	1	6	Cbelfantii_FRC0043,"Cdiphtheriae_NCTC11397","Cepidermidicanis_DSM45586","Clactis_RW25","Cmustelae_DSM45274","Cvitaeruminis_DSM20294"	0.164929	0.164929	2.66505	0.164929	0.164929	2.66505	2	1	1. 0.48456;2. 14;3. 40;4. 14;5. 14;6. 40;7. 14;8. 40;9. 40;10. D;11. GAC
ERS451417_00450	1717.62.peg.453	NA	NA	NA	1	15	Cbelfantii_FRC0043,"Ccallunae_DSM20147","Cdeserti_GIMN1010","Cdiphtheriae_NCTC11397","Cepidermidicanis_DSM45586","Cglutamicum_ATCC13032","Ckutscheri_DSM20755","Cmustelae_DSM45274","Cpseudotuberculosis_31","Cpseudotuberculosis_ATCC19410","Crouxii_FRC0190","Csilvaticum_KL0182","Ctestudinoris_DSM44614","Culcerans_NCTC12077","Culcerans_NCTC7910"	0.122297	0.122297	1.87592	0.122297	0.122297	1.87591	2	2	1. 0.45451;2. 204;3. 610;4. 209;5. 209;6. 625;7. 228;8. 682;9. 472;10. V;11. GTT	1. 0.68091;2. 507;3. 1519;4. 518;5. 512;6. 1534;7. 540;8. 1618;9. 1306;10. L;11. TTA
ERS451417_00128	1717.62.peg.126	NA	NA	NA	1	39	Cargentoratense_DSM44202,"Catypicum_R2070","Caurimucosum_ATCC700975","Cbelfantii_FRC0043","Ccallunae_DSM20147","Ccamporealensis_DSM44610","Cdeserti_GIMN1010","Cdiphtheriae_NCTC11397","Cdoosanense_DSM45436","Cefficiens_YS314","Cepidermidicanis_DSM45586","Cfalsenii_DSM44353","Cglutamicum_ATCC13032","Cglycinophilum_AJ3170","Chalotolerans_YIM70093","Chumireducens_DSM45392","Cimitans_DSM44264","Cjeike…	0.162895	0.162895	1.78273	0.162895	0.162895	1.78273	258	0
ERS451417_02052	1717.62.peg.2064	NA	NA	NA	1	15	Cbelfantii_FRC0043,"Ccallunae_DSM20147","Cdeserti_GIMN1010","Cdiphtheriae_NCTC11397","Cefficiens_YS314","Cglutamicum_ATCC13032","Chalotolerans_YIM70093","Cmustelae_DSM45274","Cpseudotuberculosis_31","Cpseudotuberculosis_ATCC19410","Csilvaticum_KL0182","Ctestudinoris_DSM44614","Culcerans_NCTC12077","Culcerans_NCTC7910","Cvitaeruminis_DSM20294"	0.0791164	0.0791164	1.70839	0.0791164	0.0791164	1.70838	258	0
ERS451417_00199	1717.62.peg.196	NA	NA	NA	1	39	Cargentoratense_DSM44202,"Catypicum_R2070","Caurimucosum_ATCC700975","Cbelfantii_FRC0043","Ccallunae_DSM20147","Ccamporealensis_DSM44610","Cdeserti_GIMN1010","Cdiphtheriae_NCTC11397","Cdoosanense_DSM45436","Cefficiens_YS314","Cepidermidicanis_DSM45586","Cfalsenii_DSM44353","Cglutamicum_ATCC13032","Cglycinophilum_AJ3170","Chalotolerans_YIM70093","Chumireducens_DSM45392","Cimitans_DSM44264","Cjeike…	0.138361	0.118865	2.06472	0.138361	0.118865	2.06472	2	1	1. 0.73627;2. 33;3. 97;4. 83;5. 83;6. 247;7. 86;8. 256;9. 34;10. R;11. AGG
ERS451417_00812	1717.62.peg.818	NA	NA	NA	1	39	Cargentoratense_DSM44202,"Catypicum_R2070","Caurimucosum_ATCC700975","Cbelfantii_FRC0043","Ccallunae_DSM20147","Ccamporealensis_DSM44610","Cdeserti_GIMN1010","Cdiphtheriae_NCTC11397","Cdoosanense_DSM45436","Cefficiens_YS314","Cepidermidicanis_DSM45586","Cfalsenii_DSM44353","Cglutamicum_ATCC13032","Cglycinophilum_AJ3170","Chalotolerans_YIM70093","Chumireducens_DSM45392","Cimitans_DSM44264","Cjeike…	0.164083	0.0901651	1.79366	0.164083	0.0901651	1.79366	3074	7	1. 0.60477;2. 87;3. 259;4. 118;5. 118;6. 352;7. 208;8. 622;9. 136;10. T;11. ACG	1. 0.64518;2. 239;3. 715;4. 292;5. 292;6. 874;7. 414;8. 1240;9. 415;10. Q;11. CAA	1. 0.64523;2. 335;3. 1003;4. 393;5. 393;6. 1177;7. 529;8. 1585;9. 628;10. A;11. GCT	1. 0.60998;2. 603;3. 1807;4. 720;5. 720;6. 2158;7. 929;8. 2785;9. 1063;10. R;11. AGG	1. 0.61985;2. 882;3. 2644;4. 999;5. 999;6. 2995;7. 1208;8. 3622;9. 1900;10. S;11. TCG	1. 0.59541;2. 1043;3. 3127;4. 1160;5. 1160;6. 3478;7. 1369;8. 4105;9. 2383;10. A;11. GCC	1. 0.61189;2. 1169;3. 3505;4. 1290;5. 1290;6. 3868;7. 1502;8. 4504;9. 2719;10. V;11. GTG
ERS451417_01569	1717.62.peg.1578	NA	NA	NA	1	38	Cargentoratense_DSM44202,"Catypicum_R2070","Caurimucosum_ATCC700975","Cbelfantii_FRC0043","Ccallunae_DSM20147","Ccamporealensis_DSM44610","Cdeserti_GIMN1010","Cdiphtheriae_NCTC11397","Cdoosanense_DSM45436","Cefficiens_YS314","Cepidermidicanis_DSM45586","Cfalsenii_DSM44353","Cglutamicum_ATCC13032","Cglycinophilum_AJ3170","Chalotolerans_YIM70093","Chumireducens_DSM45392","Cimitans_DSM44264","Cjeike…	0.125786	0.125786	1.9294	0.125786	0.125786	1.92941	2	1	1. 0.64782;2. 279;3. 835;4. 321;5. 321;6. 961;7. 322;8. 964;9. 823;10. V;11. GTC
ERS451417_01317	1717.62.peg.1325	NA	NA	NA	1	36	Catypicum_R2070,"Caurimucosum_ATCC700975","Cbelfantii_FRC0043","Ccallunae_DSM20147","Ccamporealensis_DSM44610","Cdeserti_GIMN1010","Cdiphtheriae_NCTC11397","Cdoosanense_DSM45436","Cefficiens_YS314","Cepidermidicanis_DSM45586","Cfalsenii_DSM44353","Cglutamicum_ATCC13032","Cglycinophilum_AJ3170","Chalotolerans_YIM70093","Chumireducens_DSM45392","Cimitans_DSM44264","Cjeikeium_K41","Ckroppenstedtii_D…	0.309493	0.232567	1.85661	0.309483	0.232566	1.85661	1026	3	1. 0.48578;2. 43;3. 127;4. 51;5. 51;6. 151;7. 134;8. 400;9. 25;10. N;11. AAT	1. 0.66246;2. 102;3. 304;4. 110;5. 110;6. 328;7. 193;8. 577;9. 202;10. T;11. ACA	1. 0.76865;2. 282;3. 844;4. 313;5. 313;6. 937;7. 414;8. 1240;9. 652;10. L;11. CTT
ERS451417_01792	1717.62.peg.1797	NA	NA	NA	1	38	Cargentoratense_DSM44202,"Catypicum_R2070","Caurimucosum_ATCC700975","Cbelfantii_FRC0043","Ccallunae_DSM20147","Ccamporealensis_DSM44610","Cdeserti_GIMN1010","Cdiphtheriae_NCTC11397","Cdoosanense_DSM45436","Cefficiens_YS314","Cepidermidicanis_DSM45586","Cfalsenii_DSM44353","Cglutamicum_ATCC13032","Cglycinophilum_AJ3170","Chalotolerans_YIM70093","Chumireducens_DSM45392","Cimitans_DSM44264","Cjeike…	0.346438	0.222202	1.6281	0.346448	0.222203	1.6281	1026	6	1. 0.67945;2. 41;3. 121;4. 90;5. 90;6. 268;7. 288;8. 862;9. 10;10. V;11. GTG	1. 0.75963;2. 45;3. 133;4. 94;5. 94;6. 280;7. 292;8. 874;9. 22;10. T;11. ACT	1. 0.71639;2. 92;3. 274;4. 141;5. 141;6. 421;7. 339;8. 1015;9. 163;10. S;11. AGC	1. 0.74093;2. 211;3. 631;4. 260;5. 260;6. 778;7. 458;8. 1372;9. 514;10. L;11. CTC	1. 0.73463;2. 224;3. 670;4. 273;5. 273;6. 817;7. 471;8. 1411;9. 553;10. M;11. ATG	1. 0.66081;2. 282;3. 844;4. 331;5. 331;6. 991;7. 529;8. 1585;9. 721;10. S;11. TCC
ERS451417_00370	1717.62.peg.369	NA	NA	NA	1	39	Cargentoratense_DSM44202,"Catypicum_R2070","Caurimucosum_ATCC700975","Cbelfantii_FRC0043","Ccallunae_DSM20147","Ccamporealensis_DSM44610","Cdeserti_GIMN1010","Cdiphtheriae_NCTC11397","Cdoosanense_DSM45436","Cefficiens_YS314","Cepidermidicanis_DSM45586","Cfalsenii_DSM44353","Cglutamicum_ATCC13032","Cglycinophilum_AJ3170","Chalotolerans_YIM70093","Chumireducens_DSM45392","Cimitans_DSM44264","Cjeike…	0.103904	0.103904	2.02422	0.103904	0.103904	2.02422	2	1	1. 0.65051;2. 965;3. 2893;4. 986;5. 986;6. 2956;7. 1015;8. 3043;9. 2746;10. F;11. TTC
ERS451417_00213	1717.62.peg.210	NA	NA	NA	1	6	Cbelfantii_FRC0043,"Cdiphtheriae_NCTC11397","Cmustelae_DSM45274","Cpseudotuberculosis_31","Cpseudotuberculosis_ATCC19410","Crouxii_FRC0190"	0.0900082	0.0900082	3.84919	0.0900082	0.0900082	3.84918	258	0
ERS451417_00985	1717.62.peg.996	NA	NA	NA	1	38	Cargentoratense_DSM44202,"Catypicum_R2070","Caurimucosum_ATCC700975","Cbelfantii_FRC0043","Ccallunae_DSM20147","Ccamporealensis_DSM44610","Cdeserti_GIMN1010","Cdiphtheriae_NCTC11397","Cdoosanense_DSM45436","Cefficiens_YS314","Cepidermidicanis_DSM45586","Cfalsenii_DSM44353","Cglutamicum_ATCC13032","Cglycinophilum_AJ3170","Chalotolerans_YIM70093","Chumireducens_DSM45392","Cimitans_DSM44264","Cjeike…	0.198506	0.198506	1.65799	0.198506	0.198506	1.65799	258	0
ERS451417_01648	1717.62.peg.1655	NA	NA	NA	1	38	Cargentoratense_DSM44202,"Catypicum_R2070","Caurimucosum_ATCC700975","Cbelfantii_FRC0043","Ccallunae_DSM20147","Ccamporealensis_DSM44610","Cdeserti_GIMN1010","Cdiphtheriae_NCTC11397","Cdoosanense_DSM45436","Cefficiens_YS314","Cepidermidicanis_DSM45586","Cfalsenii_DSM44353","Cglutamicum_ATCC13032","Cglycinophilum_AJ3170","Chalotolerans_YIM70093","Chumireducens_DSM45392","Cimitans_DSM44264","Cjeike…	0.116381	0.116381	1.68437	0.116381	0.116381	1.68438	258	0
ERS451417_00297	1717.62.peg.298	NA	NA	NA	1	3	Cbelfantii_FRC0043,"Cdiphtheriae_NCTC11397","Crouxii_FRC0190"	0.08395	0.08395		0.08395	0.08395		386	0
ERS451417_00633	1717.62.peg.637	NA	NA	NA	1	39	Cargentoratense_DSM44202,"Catypicum_R2070","Caurimucosum_ATCC700975","Cbelfantii_FRC0043","Ccallunae_DSM20147","Ccamporealensis_DSM44610","Cdeserti_GIMN1010","Cdiphtheriae_NCTC11397","Cdoosanense_DSM45436","Cefficiens_YS314","Cepidermidicanis_DSM45586","Cfalsenii_DSM44353","Cglutamicum_ATCC13032","Cglycinophilum_AJ3170","Chalotolerans_YIM70093","Chumireducens_DSM45392","Cimitans_DSM44264","Cjeike…	0.116902	0.116902	1.60465	0.116912	0.116912	1.60465	3330	0
ERS451417_00805	1717.62.peg.812	NA	NA	NA	1	3	Cbelfantii_FRC0043,"Cdiphtheriae_NCTC11397","Crouxii_FRC0190"	0.878555	0.103237	3.67471	0.878555	0.103237	3.67471	128	7	1. 0.82051;2. 8;3. 22;4. 24;5. 11;6. 31;7. 11;8. 31;9. 22;10. T;11. ACA	1. 0.89504;2. 62;3. 184;4. 78;5. 65;6. 193;7. 65;8. 193;9. 184;10. N;11. AAC	1. 0.8593;2. 67;3. 199;4. 83;5. 70;6. 208;7. 70;8. 208;9. 199;10. I;11. ATC	1. 0.52404;2. 117;3. 349;4. 139;5. 120;6. 358;7. 120;8. 358;9. 349;10. E;11. GAA	1. 0.88803;2. 135;3. 403;4. 157;5. 138;6. 412;7. 138;8. 412;9. 403;10. I;11. ATC	1. 0.84737;2. 175;3. 523;4. 205;5. 178;6. 532;7. 178;8. 532;9. 523;10. T;11. ACA	1. 0.82051;2. 234;3. 700;4. 292;5. 237;6. 709;7. 237;8. 709;9. 700;10. T;11. ACA
ERS451417_02262	1717.62.peg.2291	NA	NA	NA	1	38	Cargentoratense_DSM44202,"Catypicum_R2070","Caurimucosum_ATCC700975","Cbelfantii_FRC0043","Ccallunae_DSM20147","Ccamporealensis_DSM44610","Cdeserti_GIMN1010","Cdiphtheriae_NCTC11397","Cdoosanense_DSM45436","Cefficiens_YS314","Cepidermidicanis_DSM45586","Cfalsenii_DSM44353","Cglutamicum_ATCC13032","Cglycinophilum_AJ3170","Chalotolerans_YIM70093","Chumireducens_DSM45392","Cimitans_DSM44264","Cjeike…	0.164581	0.160423	1.71774	0.164312	0.160432	1.71774	2	2	1. 0.51765;2. 60;3. 178;4. 74;5. 74;6. 220;7. 95;8. 283;9. 85;10. S;11. AGC	1. 0.53811;2. 303;3. 907;4. 322;5. 322;6. 964;7. 339;8. 1015;9. 805;10. G;11. GGG
ERS451417_01331	1717.62.peg.1339	NA	NA	NA	1	38	Cargentoratense_DSM44202,"Catypicum_R2070","Caurimucosum_ATCC700975","Cbelfantii_FRC0043","Ccallunae_DSM20147","Ccamporealensis_DSM44610","Cdeserti_GIMN1010","Cdiphtheriae_NCTC11397","Cdoosanense_DSM45436","Cefficiens_YS314","Cepidermidicanis_DSM45586","Cfalsenii_DSM44353","Cglutamicum_ATCC13032","Cglycinophilum_AJ3170","Chalotolerans_YIM70093","Chumireducens_DSM45392","Cimitans_DSM44264","Cjeike…	0.121421	0.121421	1.77184	0.121421	0.121421	1.77184	2	1	1. 0.67508;2. 478;3. 1432;4. 480;5. 480;6. 1438;7. 480;8. 1438;9. 1423;10. I;11. ATA
ERS451417_01806	1717.62.peg.1812	NA	NA	NA	1	9	Caurimucosum_ATCC700975,"Cbelfantii_FRC0043","Cdiphtheriae_NCTC11397","Cpseudotuberculosis_31","Cpseudotuberculosis_ATCC19410","Csilvaticum_KL0182","Culcerans_NCTC12077","Culcerans_NCTC7910","Cvitaeruminis_DSM20294"	1	0.258791	2.8284	1	0.258791	2.8284	2048	15	1. 0.64563;2. 30;3. 88;4. 71;5. 49;6. 145;7. 49;8. 145;9. 70;10. T;11. ACC	1. 0.83722;2. 209;3. 625;4. 302;5. 262;6. 784;7. 318;8. 952;9. 496;10. L;11. CTT	1. 0.44203;2. 257;3. 769;4. 409;5. 321;6. 961;7. 393;8. 1177;9. 562;10. P;11. CCG	1. 0.89875;2. 291;3. 871;4. 444;5. 355;6. 1063;7. 435;8. 1303;9. 595;10. Y;11. TAT	1. 0.92627;2. 333;3. 997;4. 513;5. 405;6. 1213;7. 506;8. 1516;9. 637;10. N;11. AAC	1. 0.57531;2. 336;3. 1006;4. 516;5. 408;6. 1222;7. 509;8. 1525;9. 646;10. G;11. GGT	1. 0.48648;2. 420;3. 1258;4. 632;5. 492;6. 1474;7. 594;8. 1780;9. 871;10. T;11. ACC	1. 0.94396;2. 489;3. 1465;4. 731;5. 561;6. 1681;7. 663;8. 1987;9. 1078;10. L;11. CTG	1. 0.82551;2. 511;3. 1531;4. 755;5. 583;6. 1747;7. 685;8. 2053;9. 1144;10. M;11. ATG	1. 0.91253;2. 591;3. 1771;4. 841;5. 663;6. 1987;7. 765;8. 2293;9. 1384;10. S;11. TCC	1. 0.92809;2. 633;3. 1897;4. 902;5. 724;6. 2170;7. 845;8. 2533;9. 1501;10. K;11. AAA	1. 0.93165;2. 658;3. 1972;4. 927;5. 749;6. 2245;7. 870;8. 2608;9. 1552;10. F;11. TTC	1. 0.40804;2. 667;3. 1999;4. 936;5. 758;6. 2272;7. 879;8. 2635;9. 1579;10. A;11. GCC	1. 0.75793;2. 730;3. 2188;4. 1003;5. 825;6. 2473;7. 951;8. 2851;9. 1711;10. V;11. GTC	1. 0.91653;2. 814;3. 2440;4. 1087;5. 909;6. 2725;7. 1035;8. 3103;9. 1951;10. E;11. GAG
ERS451417_01473	1717.62.peg.1483	NA	NA	NA	1	38	Cargentoratense_DSM44202,"Catypicum_R2070","Caurimucosum_ATCC700975","Cbelfantii_FRC0043","Ccallunae_DSM20147","Ccamporealensis_DSM44610","Cdeserti_GIMN1010","Cdiphtheriae_NCTC11397","Cdoosanense_DSM45436","Cefficiens_YS314","Cepidermidicanis_DSM45586","Cfalsenii_DSM44353","Cglutamicum_ATCC13032","Cglycinophilum_AJ3170","Chalotolerans_YIM70093","Chumireducens_DSM45392","Cimitans_DSM44264","Cjeike…	0.107325	0.0558929	1.98983	0.0558929	0.0558929	1.98946	1282	0
ERS451417_00966	1717.62.peg.974	NA	NA	NA	1	17	Cargentoratense_DSM44202,"Cbelfantii_FRC0043","Cdiphtheriae_NCTC11397","Cefficiens_YS314","Cepidermidicanis_DSM45586","Cglutamicum_ATCC13032","Ckroppenstedtii_DSM44385","Ckutscheri_DSM20755","Clactis_RW25","Cmustelae_DSM45274","Cpseudotuberculosis_31","Cpseudotuberculosis_ATCC19410","Crouxii_FRC0190","Csilvaticum_KL0182","Culcerans_NCTC12077","Culcerans_NCTC7910","Cvitaeruminis_DSM20294"	0.171036	0.171036	2.51283	0.171036	0.171036	2.51283	258	0
ERS451417_00007	1717.62.peg.8	NA	NA	NA	1	6	Cbelfantii_FRC0043,"Cdiphtheriae_NCTC11397","Cglutamicum_ATCC13032","Crouxii_FRC0190","Csilvaticum_KL0182","Culcerans_NCTC7910"	0.261275	0.261275	2.90752	0.261275	0.261275	2.90752	258	0
ERS451417_00882	1717.62.peg.888	NA	NA	NA	1	36	Cargentoratense_DSM44202,"Catypicum_R2070","Caurimucosum_ATCC700975","Cbelfantii_FRC0043","Ccallunae_DSM20147","Ccamporealensis_DSM44610","Cdeserti_GIMN1010","Cdiphtheriae_NCTC11397","Cdoosanense_DSM45436","Cefficiens_YS314","Cfalsenii_DSM44353","Cglutamicum_ATCC13032","Cglycinophilum_AJ3170","Chalotolerans_YIM70093","Chumireducens_DSM45392","Cimitans_DSM44264","Cjeikeium_K41","Ckroppenstedtii_DS…	0.147577	0.147577	2.08103	0.147577	0.147577	2.08102	3330	0
ERS451417_00413	1717.62.peg.413	NA	NA	NA	1	13	Catypicum_R2070,"Cbelfantii_FRC0043","Ccamporealensis_DSM44610","Cdiphtheriae_NCTC11397","Cepidermidicanis_DSM45586","Ckutscheri_DSM20755","Cpseudotuberculosis_31","Cpseudotuberculosis_ATCC19410","Crouxii_FRC0190","Csilvaticum_KL0182","Csimulans_PES1","Culcerans_NCTC12077","Culcerans_NCTC7910"	0.08765	0.08765	2.24696	0.0876592	0.0876592	2.24696	2	1	1. 0.43538;2. 141;3. 421;4. 142;5. 142;6. 424;7. 145;8. 433;9. 373;10. I;11. ATC
ERS451417_00865	1717.62.peg.870	NA	NA	NA	1	3	Cdiphtheriae_NCTC11397,"Crouxii_FRC0190","Csimulans_PES1"	0.291616	0.291567	1.7198	0.291596	0.291567	1.7198	4482	0
ERS451417_01883	1717.62.peg.1884	NA	NA	NA	1	35	Cargentoratense_DSM44202,"Catypicum_R2070","Caurimucosum_ATCC700975","Cbelfantii_FRC0043","Ccallunae_DSM20147","Ccamporealensis_DSM44610","Cdeserti_GIMN1010","Cdiphtheriae_NCTC11397","Cdoosanense_DSM45436","Cefficiens_YS314","Cepidermidicanis_DSM45586","Cfalsenii_DSM44353","Cglutamicum_ATCC13032","Chalotolerans_YIM70093","Chumireducens_DSM45392","Cimitans_DSM44264","Cjeikeium_K41","Ckroppenstedti…	0.151218	0.151218	1.87756	0.151218	0.151218	1.87756	258	0
ERS451417_00750	1717.62.peg.755	NA	NA	NA	1	22	Cargentoratense_DSM44202,"Cbelfantii_FRC0043","Ccallunae_DSM20147","Cdeserti_GIMN1010","Cdiphtheriae_NCTC11397","Cefficiens_YS314","Cepidermidicanis_DSM45586","Cglutamicum_ATCC13032","Chalotolerans_YIM70093","Chumireducens_DSM45392","Ckroppenstedtii_DSM44385","Ckutscheri_DSM20755","Clactis_RW25","Cmarinum_DSM44953","Cmustelae_DSM45274","Cpseudotuberculosis_31","Cpseudotuberculosis_ATCC19410","Cro…	0.194273	0.194273	1.70844	0.194273	0.194273	1.70844	258	0
ERS451417_00752	1717.62.peg.757	NA	NA	NA	1	9	Cdeserti_GIMN1010,"Cdiphtheriae_NCTC11397","Ckutscheri_DSM20755","Cpseudotuberculosis_ATCC19410","Crouxii_FRC0190","Csilvaticum_KL0182","Culcerans_NCTC12077","Culcerans_NCTC7910","Cvitaeruminis_DSM20294"	0.11273	0.11273	2.2863	0.11273	0.11273	2.2863	4354	0
ERS451417_02297	1717.62.peg.2326	NA	NA	NA	1	31	Cargentoratense_DSM44202,"Catypicum_R2070","Cbelfantii_FRC0043","Ccallunae_DSM20147","Cdeserti_GIMN1010","Cdiphtheriae_NCTC11397","Cefficiens_YS314","Cepidermidicanis_DSM45586","Cglutamicum_ATCC13032","Cglycinophilum_AJ3170","Chalotolerans_YIM70093","Chumireducens_DSM45392","Cimitans_DSM44264","Ckroppenstedtii_DSM44385","Ckutscheri_DSM20755","Clactis_RW25","Cmarinum_DSM44953","Cmaris_DSM45190","C…	0.428686	0.149978	1.75209	0.263866	0.149968	1.7521	3330	0
ERS451417_01683	1717.62.peg.1690	NA	NA	NA	1	31	Caurimucosum_ATCC700975,"Cbelfantii_FRC0043","Ccallunae_DSM20147","Cdeserti_GIMN1010","Cdiphtheriae_NCTC11397","Cdoosanense_DSM45436","Cefficiens_YS314","Cepidermidicanis_DSM45586","Cfalsenii_DSM44353","Cglycinophilum_AJ3170","Chalotolerans_YIM70093","Cimitans_DSM44264","Cjeikeium_K41","Ckroppenstedtii_DSM44385","Ckutscheri_DSM20755","Clactis_RW25","Cmarinum_DSM44953","Cmaris_DSM45190","Cmustelae…	0.33945	0.265516	1.23806	0.269034	0.265526	1.23806	3330	0
ERS451417_00830	1717.62.peg.834	NA	NA	NA	1	9	Cbelfantii_FRC0043,"Cdiphtheriae_NCTC11397","Ckutscheri_DSM20755","Cpseudotuberculosis_31","Cpseudotuberculosis_ATCC19410","Crouxii_FRC0190","Culcerans_NCTC12077","Culcerans_NCTC7910","Cvitaeruminis_DSM20294"	0.149296	0.149296	2.29514	0.149296	0.149296	2.29513	2050	1	1. 0.69893;2. 73;3. 217;4. 101;5. 73;6. 217;7. 84;8. 250;9. 112;10. H;11. CAC
ERS451417_01784	1717.62.peg.1789	NA	NA	NA	1	26	Catypicum_R2070,"Caurimucosum_ATCC700975","Cbelfantii_FRC0043","Ccallunae_DSM20147","Ccamporealensis_DSM44610","Cdeserti_GIMN1010","Cdiphtheriae_NCTC11397","Cdoosanense_DSM45436","Cefficiens_YS314","Cglutamicum_ATCC13032","Chalotolerans_YIM70093","Chumireducens_DSM45392","Cimitans_DSM44264","Ckutscheri_DSM20755","Cmarinum_DSM44953","Cmaris_DSM45190","Cpseudotuberculosis_31","Cpseudotuberculosis_A…	0.121961	0.121961	1.88083	0.121961	0.121961	1.88083	3074	2	1. 0.41165;2. 40;3. 118;4. 75;5. 49;6. 145;7. 67;8. 199;9. 55;10. N;11. AAT	1. 0.54336;2. 67;3. 199;4. 102;5. 76;6. 226;7. 94;8. 280;9. 136;10. D;11. GAC
ERS451417_00677	1717.62.peg.684	NA	NA	NA	1	39	Cargentoratense_DSM44202,"Catypicum_R2070","Caurimucosum_ATCC700975","Cbelfantii_FRC0043","Ccallunae_DSM20147","Ccamporealensis_DSM44610","Cdeserti_GIMN1010","Cdiphtheriae_NCTC11397","Cdoosanense_DSM45436","Cefficiens_YS314","Cepidermidicanis_DSM45586","Cfalsenii_DSM44353","Cglutamicum_ATCC13032","Cglycinophilum_AJ3170","Chalotolerans_YIM70093","Chumireducens_DSM45392","Cimitans_DSM44264","Cjeike…	0.0765887	0.0765887	1.66885	0.0765887	0.0765887	1.66887	2	1	1. 0.41916;2. 150;3. 448;4. 178;5. 178;6. 532;7. 210;8. 628;9. 286;10. I;11. ATC
ERS451417_00758	1717.62.peg.763	NA	NA	NA	1	39	Cargentoratense_DSM44202,"Catypicum_R2070","Caurimucosum_ATCC700975","Cbelfantii_FRC0043","Ccallunae_DSM20147","Ccamporealensis_DSM44610","Cdeserti_GIMN1010","Cdiphtheriae_NCTC11397","Cdoosanense_DSM45436","Cefficiens_YS314","Cepidermidicanis_DSM45586","Cfalsenii_DSM44353","Cglutamicum_ATCC13032","Cglycinophilum_AJ3170","Chalotolerans_YIM70093","Chumireducens_DSM45392","Cimitans_DSM44264","Cjeike…	0.117585	0.117585	2.72259	0.117585	0.117585	2.72259	2306	0
ERS451417_01310	1717.62.peg.1318	NA	NA	NA	1	38	Cargentoratense_DSM44202,"Catypicum_R2070","Caurimucosum_ATCC700975","Cbelfantii_FRC0043","Ccallunae_DSM20147","Ccamporealensis_DSM44610","Cdeserti_GIMN1010","Cdiphtheriae_NCTC11397","Cdoosanense_DSM45436","Cefficiens_YS314","Cepidermidicanis_DSM45586","Cfalsenii_DSM44353","Cglutamicum_ATCC13032","Cglycinophilum_AJ3170","Chalotolerans_YIM70093","Chumireducens_DSM45392","Cimitans_DSM44264","Cjeike…	0.159421	0.159421	1.52248	0.159422	0.159422	1.52248	258	0
ERS451417_00379	1717.62.peg.379	NA	NA	NA	1	3	Cdiphtheriae_NCTC11397,"Crouxii_FRC0190","Csimulans_PES1"	0.305477	0.305477	4.8334	0.30547	0.30547	4.8334	4482	0
ERS451417_00717	1717.62.peg.722	NA	NA	NA	1	12	Cargentoratense_DSM44202,"Cbelfantii_FRC0043","Cdiphtheriae_NCTC11397","Cepidermidicanis_DSM45586","Ckutscheri_DSM20755","Cmustelae_DSM45274","Cpseudotuberculosis_31","Crouxii_FRC0190","Csilvaticum_KL0182","Culcerans_NCTC12077","Culcerans_NCTC7910","Cvitaeruminis_DSM20294"	0.211603	0.211603	2.35349	0.248293	0.209579	2.35366	2050	2	1. 0.62037;2. 62;3. 184;4. 106;5. 86;6. 256;7. 127;8. 379;9. 118;10. I;11. ATC	1. 0.57536;2. 238;3. 712;4. 309;5. 268;6. 802;7. 318;8. 952;9. 559;10. T;11. ACG
ERS451417_01679	1717.62.peg.1686	NA	NA	NA	1	19	Cargentoratense_DSM44202,"Caurimucosum_ATCC700975","Cbelfantii_FRC0043","Ccallunae_DSM20147","Cdeserti_GIMN1010","Cdiphtheriae_NCTC11397","Cdoosanense_DSM45436","Cglutamicum_ATCC13032","Chalotolerans_YIM70093","Ckutscheri_DSM20755","Clactis_RW25","Cmustelae_DSM45274","Csilvaticum_KL0182","Csimulans_PES1","Csingulare_IBSB52218","Cterpenotabidum_Y11","Culcerans_NCTC12077","Culcerans_NCTC7910","Cure…	0.41422	0.41422	1.95915	0.633782	0.414099	1.96664	2	2	1. 0.7521;2. 60;3. 178;4. 72;5. 72;6. 214;7. 84;8. 250;9. 154;10. V;11. GTA	1. 0.71246;2. 167;3. 499;4. 179;5. 179;6. 535;7. 191;8. 571;9. 385;10. A;11. GCC
ERS451417_00328	1717.62.peg.330	NA	NA	NA	1	23	Cbelfantii_FRC0043,"Ccallunae_DSM20147","Cdeserti_GIMN1010","Cdiphtheriae_NCTC11397","Cdoosanense_DSM45436","Cefficiens_YS314","Cepidermidicanis_DSM45586","Cglutamicum_ATCC13032","Chalotolerans_YIM70093","Chumireducens_DSM45392","Cimitans_DSM44264","Ckutscheri_DSM20755","Cmarinum_DSM44953","Cmustelae_DSM45274","Cpseudotuberculosis_31","Cpseudotuberculosis_ATCC19410","Crouxii_FRC0190","Csilvaticum…	0.194566	0.194566	1.58283	0.194566	0.194566	1.58283	3330	0
ERS451417_00984	1717.62.peg.995	NA	NA	NA	1	7	Cbelfantii_FRC0043,"Cdiphtheriae_NCTC11397","Cpseudotuberculosis_31","Cpseudotuberculosis_ATCC19410","Crouxii_FRC0190","Culcerans_NCTC12077","Culcerans_NCTC7910"	0.326019	0.304442	3.35872	0.326019	0.304442	3.35872	2	1	1. 0.66414;2. 104;3. 310;4. 129;5. 105;6. 313;7. 104;8. 310;9. 274;10. S;11. TCA
ERS451417_01697	1717.62.peg.1704	NA	NA	NA	1	15	Cargentoratense_DSM44202,"Cbelfantii_FRC0043","Cdiphtheriae_NCTC11397","Cefficiens_YS314","Cepidermidicanis_DSM45586","Ckroppenstedtii_DSM44385","Ckutscheri_DSM20755","Clactis_RW25","Cmustelae_DSM45274","Cpseudotuberculosis_31","Cpseudotuberculosis_ATCC19410","Csilvaticum_KL0182","Culcerans_NCTC12077","Culcerans_NCTC7910","Cvitaeruminis_DSM20294"	0.328316	0.328316	2.1569	0.328316	0.328316	2.1569	3330	0
ERS451417_02128	1717.62.peg.2146	NA	NA	NA	1	38	Cargentoratense_DSM44202,"Catypicum_R2070","Caurimucosum_ATCC700975","Cbelfantii_FRC0043","Ccallunae_DSM20147","Ccamporealensis_DSM44610","Cdeserti_GIMN1010","Cdiphtheriae_NCTC11397","Cdoosanense_DSM45436","Cefficiens_YS314","Cepidermidicanis_DSM45586","Cfalsenii_DSM44353","Cglutamicum_ATCC13032","Cglycinophilum_AJ3170","Chalotolerans_YIM70093","Chumireducens_DSM45392","Cimitans_DSM44264","Cjeike…	0.119836	0.119836	1.88452	0.119836	0.119836	1.88453	2	1	1. 0.64753;2. 754;3. 2260;4. 760;5. 760;6. 2278;7. 780;8. 2338;9. 2197;10. T;11. ACG
ERS451417_01205	1717.62.peg.1213	NA	NA	NA	1	8	Cbelfantii_FRC0043,"Cdiphtheriae_NCTC11397","Cpseudotuberculosis_31","Cpseudotuberculosis_ATCC19410","Crouxii_FRC0190","Culcerans_NCTC12077","Culcerans_NCTC7910","Cvitaeruminis_DSM20294"	0.248076	0.1068	2.51927	0.248076	0.1068	2.51927	2	2	1. 0.7908;2. 59;3. 175;4. 63;5. 61;6. 181;7. 62;8. 184;9. 148;10. A;11. GCA	1. 0.73448;2. 152;3. 454;4. 167;5. 155;6. 463;7. 155;8. 463;9. 403;10. L;11. CTA
ERS451417_00070	1717.62.peg.66	NA	NA	NA	1	10	Cbelfantii_FRC0043,"Cdiphtheriae_NCTC11397","Cepidermidicanis_DSM45586","Ckutscheri_DSM20755","Cpseudotuberculosis_31","Cpseudotuberculosis_ATCC19410","Crouxii_FRC0190","Csilvaticum_KL0182","Culcerans_NCTC12077","Culcerans_NCTC7910"	0.357451	0.357451	4.79209	0.357451	0.357451	4.79208	2	1	1. 0.51786;2. 18;3. 52;4. 34;5. 26;6. 76;7. 27;8. 79;9. 43;10. A;11. GCT
ERS451417_00037	1717.62.peg.33	NA	NA	NA	1	6	Cbelfantii_FRC0043,"Cdiphtheriae_NCTC11397","Cefficiens_YS314","Chalotolerans_YIM70093","Cjeikeium_K41","Curealyticum_DSM7109"	0.325729	0.312923	1.63408	0.325729	0.312923	1.63408	2	2	1. 0.50337;2. 2;3. 4;4. 6;5. 2;6. 4;7. 2;8. 4;9. 4;10. D;11. GAC	1. 0.46158;2. 19;3. 55;4. 32;5. 20;6. 58;7. 20;8. 58;9. 52;10. E;11. GAA
ERS451417_00040	1717.62.peg.36	NA	NA	NA	1	14	Caurimucosum_ATCC700975,"Cbelfantii_FRC0043","Cdiphtheriae_NCTC11397","Cepidermidicanis_DSM45586","Cfalsenii_DSM44353","Cjeikeium_K41","CriegeliiPUDD83A45","Crouxii_FRC0190","Csimulans_PES1","Csingulare_IBSB52218","Culcerans_NCTC12077","Culcerans_NCTC7910","Cureicelerivorans_IMMIBRIV2301","Cvitaeruminis_DSM20294"	0.393838	0.255858	2.30378	0.413201	0.255216	2.3058	3074	1	1. 0.82585;2. 89;3. 265;4. 328;5. 110;6. 328;7. 116;8. 346;9. 247;10. T;11. ACC
ERS451417_01010	1717.62.peg.1021	NA	NA	NA	1	39	Cargentoratense_DSM44202,"Catypicum_R2070","Caurimucosum_ATCC700975","Cbelfantii_FRC0043","Ccallunae_DSM20147","Ccamporealensis_DSM44610","Cdeserti_GIMN1010","Cdiphtheriae_NCTC11397","Cdoosanense_DSM45436","Cefficiens_YS314","Cepidermidicanis_DSM45586","Cfalsenii_DSM44353","Cglutamicum_ATCC13032","Cglycinophilum_AJ3170","Chalotolerans_YIM70093","Chumireducens_DSM45392","Cimitans_DSM44264","Cjeike…	0.201184	0.201184	1.88524	0.201184	0.201184	1.88524	258	0
ERS451417_00398	1717.62.peg.398	NA	NA	NA	1	39	Cargentoratense_DSM44202,"Catypicum_R2070","Caurimucosum_ATCC700975","Cbelfantii_FRC0043","Ccallunae_DSM20147","Ccamporealensis_DSM44610","Cdeserti_GIMN1010","Cdiphtheriae_NCTC11397","Cdoosanense_DSM45436","Cefficiens_YS314","Cepidermidicanis_DSM45586","Cfalsenii_DSM44353","Cglutamicum_ATCC13032","Cglycinophilum_AJ3170","Chalotolerans_YIM70093","Chumireducens_DSM45392","Cimitans_DSM44264","Cjeike…	0.37169	0.131678	1.67139	0.248747	0.131677	1.67139	258	0
ERS451417_00197	1717.62.peg.194	NA	NA	NA	1	5	Cbelfantii_FRC0043,"Cdiphtheriae_NCTC11397","Crouxii_FRC0190","Culcerans_NCTC12077","Culcerans_NCTC7910"	0.660311	0.403014	3.82568	0.660311	0.403014	3.82567	2	8	1. 0.87253;2. 41;3. 121;4. 175;5. 46;6. 136;7. 46;8. 136;9. 85;10. E;11. GAA	1. 0.79262;2. 70;3. 208;4. 217;5. 84;6. 250;7. 84;8. 250;9. 157;10. S;11. TCC	1. 0.44543;2. 90;3. 268;4. 242;5. 104;6. 310;7. 104;8. 310;9. 217;10. I;11. ATC	1. 0.66809;2. 113;3. 337;4. 265;5. 127;6. 379;7. 127;8. 379;9. 283;10. A;11. GCC	1. 0.76418;2. 199;3. 595;4. 385;5. 216;6. 646;7. 216;8. 646;9. 535;10. V;11. GTA	1. 0.48517;2. 257;3. 769;4. 455;5. 274;6. 820;7. 274;8. 820;9. 709;10. I;11. ATA	1. 0.786;2. 258;3. 772;4. 456;5. 275;6. 823;7. 275;8. 823;9. 712;10. I;11. ATC	1. 0.44055;2. 267;3. 799;4. 465;5. 284;6. 850;7. 284;8. 850;9. 739;10. I;11. ATC
ERS451417_02374	1717.62.peg.2404	NA	NA	NA	1	12	Cbelfantii_FRC0043,"Cdiphtheriae_NCTC11397","Cdoosanense_DSM45436","Chalotolerans_YIM70093","Chumireducens_DSM45392","Cmarinum_DSM44953","Cmaris_DSM45190","Cpseudotuberculosis_ATCC19410","Csilvaticum_KL0182","Culcerans_NCTC12077","Culcerans_NCTC7910","Cvitaeruminis_DSM20294"	0.414224	0.19639	2.1102	0.414224	0.19639	2.1102	3074	1	1. 0.86714;2. 18;3. 52;4. 33;5. 19;6. 55;7. 21;8. 61;9. 25;10. L;11. CTC
ERS451417_00685	1717.62.peg.691	NA	NA	NA	1	11	Cargentoratense_DSM44202,"Catypicum_R2070","Cbelfantii_FRC0043","Cdiphtheriae_NCTC11397","Cglutamicum_ATCC13032","Ckroppenstedtii_DSM44385","Ckutscheri_DSM20755","Cmaris_DSM45190","Cmustelae_DSM45274","Csilvaticum_KL0182","Cterpenotabidum_Y11"	0.432118	0.432118	1.73226	0.432118	0.432118	1.73225	2050	1	1. 0.68956;2. 110;3. 328;4. 128;5. 128;6. 382;7. 150;8. 448;9. 196;10. S;11. AGT
ERS451417_00575	1717.62.peg.578	NA	NA	NA	1	39	Cargentoratense_DSM44202,"Catypicum_R2070","Caurimucosum_ATCC700975","Cbelfantii_FRC0043","Ccallunae_DSM20147","Ccamporealensis_DSM44610","Cdeserti_GIMN1010","Cdiphtheriae_NCTC11397","Cdoosanense_DSM45436","Cefficiens_YS314","Cepidermidicanis_DSM45586","Cfalsenii_DSM44353","Cglutamicum_ATCC13032","Cglycinophilum_AJ3170","Chalotolerans_YIM70093","Chumireducens_DSM45392","Cimitans_DSM44264","Cjeike…	0.126743	0.126743	2.27788	0.126743	0.126743	2.27788	258	0
ERS451417_01573	1717.62.peg.1582	NA	NA	NA	1	38	Cargentoratense_DSM44202,"Catypicum_R2070","Caurimucosum_ATCC700975","Cbelfantii_FRC0043","Ccallunae_DSM20147","Ccamporealensis_DSM44610","Cdeserti_GIMN1010","Cdiphtheriae_NCTC11397","Cdoosanense_DSM45436","Cefficiens_YS314","Cepidermidicanis_DSM45586","Cfalsenii_DSM44353","Cglutamicum_ATCC13032","Cglycinophilum_AJ3170","Chalotolerans_YIM70093","Chumireducens_DSM45392","Cimitans_DSM44264","Cjeike…	0.23656	0.23656	1.58785	0.23656	0.23656	1.58785	3330	0
ERS451417_02092	1717.62.peg.2106	NA	NA	NA	1	3	Cdiphtheriae_NCTC11397,"Csimulans_PES1","Csingulare_IBSB52218"	1	1		1	1		4224	1	1. 0.48574;2. 33;3. 97;4. 33;5. 33;6. 97;7. 33;8. 97;9. 97;10. V;11. GTG
ERS451417_01450	1717.62.peg.1457	NA	NA	NA	1	33	Cargentoratense_DSM44202,"Catypicum_R2070","Caurimucosum_ATCC700975","Cbelfantii_FRC0043","Ccallunae_DSM20147","Ccamporealensis_DSM44610","Cdeserti_GIMN1010","Cdiphtheriae_NCTC11397","Cdoosanense_DSM45436","Cefficiens_YS314","Cepidermidicanis_DSM45586","Cglutamicum_ATCC13032","Cglycinophilum_AJ3170","Chalotolerans_YIM70093","Chumireducens_DSM45392","Cimitans_DSM44264","Ckroppenstedtii_DSM44385","…	0.184589	0.184589	2.02331	0.184589	0.184589	2.02331	2	1	1. 0.51386;2. 46;3. 136;4. 87;5. 87;6. 259;7. 119;8. 355;9. 52;10. D;11. GAT
ERS451417_00303	1717.62.peg.304	NA	NA	NA	1	22	Catypicum_R2070,"Caurimucosum_ATCC700975","Cbelfantii_FRC0043","Ccamporealensis_DSM44610","Cdiphtheriae_NCTC11397","Cepidermidicanis_DSM45586","Chumireducens_DSM45392","Cimitans_DSM44264","Cmarinum_DSM44953","Cmustelae_DSM45274","Cpseudotuberculosis_31","Cpseudotuberculosis_ATCC19410","CriegeliiPUDD83A45","Crouxii_FRC0190","Csilvaticum_KL0182","Csimulans_PES1","Csingulare_IBSB52218","Ctestudinori…	0.429376	0.134555	1.09414	0.26495	0.134555	1.09414	258	0
ERS451417_00411	1717.62.peg.411	NA	NA	NA	1	36	Cargentoratense_DSM44202,"Catypicum_R2070","Cbelfantii_FRC0043","Ccallunae_DSM20147","Cdeserti_GIMN1010","Cdiphtheriae_NCTC11397","Cdoosanense_DSM45436","Cefficiens_YS314","Cepidermidicanis_DSM45586","Cfalsenii_DSM44353","Cglutamicum_ATCC13032","Cglycinophilum_AJ3170","Chalotolerans_YIM70093","Chumireducens_DSM45392","Cimitans_DSM44264","Cjeikeium_K41","Ckroppenstedtii_DSM44385","Ckutscheri_DSM20…	0.0853027	0.0853027	1.72805	0.0853027	0.0853027	1.72805	258	0
ERS451417_00254	1717.62.peg.249	NA	NA	NA	1	8	Cargentoratense_DSM44202,"Cbelfantii_FRC0043","Cdiphtheriae_NCTC11397","Cmustelae_DSM45274","Cpseudotuberculosis_ATCC19410","Crouxii_FRC0190","Culcerans_NCTC12077","Culcerans_NCTC7910"	0.114997	0.114997	2.7537	0.114997	0.114997	2.7537	2	4	1. 0.9351;2. 169;3. 505;4. 183;5. 183;6. 547;7. 187;8. 559;9. 415;10. V;11. GTG	1. 0.54102;2. 171;3. 511;4. 185;5. 185;6. 553;7. 189;8. 565;9. 421;10. H;11. CAC	1. 0.6677;2. 213;3. 637;4. 227;5. 227;6. 679;7. 231;8. 691;9. 526;10. K;11. AAA	1. 0.6368;2. 274;3. 820;4. 288;5. 288;6. 862;7. 292;8. 874;9. 709;10. N;11. AAT
ERS451417_01243	1717.62.peg.1251	NA	NA	NA	1	8	Cbelfantii_FRC0043,"Cdiphtheriae_NCTC11397","Cmustelae_DSM45274","Cpseudotuberculosis_ATCC19410","Crouxii_FRC0190","Csilvaticum_KL0182","Culcerans_NCTC12077","Culcerans_NCTC7910"	0.219553	0.219553	2.67855	0.219553	0.219553	2.67854	2	2	1. 0.44234;2. 215;3. 643;4. 291;5. 254;6. 760;7. 255;8. 763;9. 592;10. N;11. AAC	1. 0.40325;2. 274;3. 820;4. 370;5. 313;6. 937;7. 316;8. 946;9. 742;10. M;11. ATG
ERS451417_02167	1717.62.peg.2192	NA	NA	NA	1	12	Cbelfantii_FRC0043,"Ccallunae_DSM20147","Ccamporealensis_DSM44610","Cdeserti_GIMN1010","Cdiphtheriae_NCTC11397","Cdoosanense_DSM45436","Cglutamicum_ATCC13032","Chalotolerans_YIM70093","Ckutscheri_DSM20755","Clactis_RW25","Cmustelae_DSM45274","Ctestudinoris_DSM44614"	0.191205	0.191205	1.62935	0.191205	0.191205	1.62935	2306	0
ERS451417_02386	1717.62.peg.2418	NA	NA	NA	1	38	Cargentoratense_DSM44202,"Catypicum_R2070","Caurimucosum_ATCC700975","Cbelfantii_FRC0043","Ccallunae_DSM20147","Ccamporealensis_DSM44610","Cdeserti_GIMN1010","Cdiphtheriae_NCTC11397","Cdoosanense_DSM45436","Cefficiens_YS314","Cepidermidicanis_DSM45586","Cfalsenii_DSM44353","Cglutamicum_ATCC13032","Cglycinophilum_AJ3170","Chalotolerans_YIM70093","Chumireducens_DSM45392","Cimitans_DSM44264","Cjeike…	0.188993	0.188993	1.58683	0.188993	0.188993	1.58683	1026	1	1. 0.63296;2. 142;3. 424;4. 167;5. 167;6. 499;7. 215;8. 643;9. 370;10. I;11. ATA
ERS451417_01774	1717.62.peg.1776	NA	NA	NA	1	4	Cbelfantii_FRC0043,"Cdiphtheriae_NCTC11397","Cfalsenii_DSM44353","Ckroppenstedtii_DSM44385"	0.262747	0.262549	1.0066	0.287134	0.262559	1.0066	258	0
ERS451417_00740	1717.62.peg.743	NA	NA	NA	1	34	Cargentoratense_DSM44202,"Catypicum_R2070","Caurimucosum_ATCC700975","Cbelfantii_FRC0043","Ccamporealensis_DSM44610","Cdeserti_GIMN1010","Cdiphtheriae_NCTC11397","Cdoosanense_DSM45436","Cefficiens_YS314","Cepidermidicanis_DSM45586","Cfalsenii_DSM44353","Cglutamicum_ATCC13032","Cglycinophilum_AJ3170","Chalotolerans_YIM70093","Chumireducens_DSM45392","Cimitans_DSM44264","Cjeikeium_K41","Clactis_RW2…	0.362849	0.362849	1.75061	0.362849	0.362849	1.75061	3330	0
ERS451417_02203	1717.62.peg.2229	NA	NA	NA	1	21	Catypicum_R2070,"Caurimucosum_ATCC700975","Cbelfantii_FRC0043","Ccallunae_DSM20147","Ccamporealensis_DSM44610","Cdeserti_GIMN1010","Cdiphtheriae_NCTC11397","Cdoosanense_DSM45436","Cepidermidicanis_DSM45586","Cglutamicum_ATCC13032","Chalotolerans_YIM70093","Ckutscheri_DSM20755","Cmaris_DSM45190","Cpseudotuberculosis_31","Cpseudotuberculosis_ATCC19410","Csilvaticum_KL0182","Csimulans_PES1","Csingul…	0.112028	0.111495	2.00449	0.112028	0.111495	2.00449	2	1	1. 0.442;2. 46;3. 136;4. 67;5. 52;6. 154;7. 49;8. 145;9. 127;10. I;11. ATA
ERS451417_01244	1717.62.peg.1252	NA	NA	NA	1	16	Cbelfantii_FRC0043,"Ccallunae_DSM20147","Cdeserti_GIMN1010","Cdiphtheriae_NCTC11397","Cefficiens_YS314","Cglutamicum_ATCC13032","Chalotolerans_YIM70093","Chumireducens_DSM45392","Cmarinum_DSM44953","Cpseudotuberculosis_31","Cpseudotuberculosis_ATCC19410","Crouxii_FRC0190","Csilvaticum_KL0182","Culcerans_NCTC12077","Culcerans_NCTC7910","Cvitaeruminis_DSM20294"	0.32676	0.32676	1.68164	0.32676	0.32676	1.68164	258	0
ERS451417_00094	1717.62.peg.92	NA	NA	NA	1	11	Cbelfantii_FRC0043,"Cdiphtheriae_NCTC11397","Ckutscheri_DSM20755","Cmustelae_DSM45274","Cpseudotuberculosis_31","Cpseudotuberculosis_ATCC19410","Crouxii_FRC0190","Csilvaticum_KL0182","Culcerans_NCTC12077","Culcerans_NCTC7910","Cvitaeruminis_DSM20294"	0.22214	0.137849	2.8566	0.23499	0.135219	2.87384	2050	2	1. 0.7561;2. 119;3. 355;4. 135;5. 134;6. 400;7. 134;8. 400;9. 259;10. V;11. GTC	1. 0.78384;2. 184;3. 550;4. 201;5. 199;6. 595;7. 199;8. 595;9. 454;10. Q;11. CAA
ERS451417_01320	1717.62.peg.1328	NA	NA	NA	1	37	Cargentoratense_DSM44202,"Catypicum_R2070","Caurimucosum_ATCC700975","Cbelfantii_FRC0043","Ccallunae_DSM20147","Ccamporealensis_DSM44610","Cdeserti_GIMN1010","Cdiphtheriae_NCTC11397","Cdoosanense_DSM45436","Cefficiens_YS314","Cepidermidicanis_DSM45586","Cfalsenii_DSM44353","Cglutamicum_ATCC13032","Cglycinophilum_AJ3170","Chalotolerans_YIM70093","Chumireducens_DSM45392","Cimitans_DSM44264","Cjeike…	0.262248	0.262248	1.57685	0.262248	0.262248	1.57685	3330	0
ERS451417_01741	1717.62.peg.1745	NA	NA	NA	1	38	Cargentoratense_DSM44202,"Catypicum_R2070","Caurimucosum_ATCC700975","Cbelfantii_FRC0043","Ccallunae_DSM20147","Ccamporealensis_DSM44610","Cdeserti_GIMN1010","Cdiphtheriae_NCTC11397","Cdoosanense_DSM45436","Cefficiens_YS314","Cepidermidicanis_DSM45586","Cfalsenii_DSM44353","Cglutamicum_ATCC13032","Cglycinophilum_AJ3170","Chalotolerans_YIM70093","Chumireducens_DSM45392","Cimitans_DSM44264","Cjeike…	0.103652	0.103652	1.47178	0.103661	0.103661	1.47178	2	2	1. 0.59546;2. 156;3. 466;4. 201;5. 201;6. 601;7. 250;8. 748;9. 310;10. V;11. GTA	1. 0.47198;2. 515;3. 1543;4. 565;5. 565;6. 1693;7. 617;8. 1849;9. 1345;10. I;11. ATC
ERS451417_01304	1717.62.peg.1312	NA	NA	NA	1	38	Cargentoratense_DSM44202,"Catypicum_R2070","Caurimucosum_ATCC700975","Cbelfantii_FRC0043","Ccallunae_DSM20147","Ccamporealensis_DSM44610","Cdeserti_GIMN1010","Cdiphtheriae_NCTC11397","Cdoosanense_DSM45436","Cefficiens_YS314","Cepidermidicanis_DSM45586","Cfalsenii_DSM44353","Cglutamicum_ATCC13032","Cglycinophilum_AJ3170","Chalotolerans_YIM70093","Chumireducens_DSM45392","Cimitans_DSM44264","Cjeike…	0.145605	0.145605	1.65533	0.145605	0.145605	1.65533	1026	1	1. 0.44658;2. 107;3. 319;4. 132;5. 132;6. 394;7. 320;8. 958;9. 142;10. N;11. AAT
ERS451417_00962	1717.62.peg.969	NA	NA	NA	1	39	Cargentoratense_DSM44202,"Catypicum_R2070","Caurimucosum_ATCC700975","Cbelfantii_FRC0043","Ccallunae_DSM20147","Ccamporealensis_DSM44610","Cdeserti_GIMN1010","Cdiphtheriae_NCTC11397","Cdoosanense_DSM45436","Cefficiens_YS314","Cepidermidicanis_DSM45586","Cfalsenii_DSM44353","Cglutamicum_ATCC13032","Cglycinophilum_AJ3170","Chalotolerans_YIM70093","Chumireducens_DSM45392","Cimitans_DSM44264","Cjeike…	0.0783787	0.0783787	2.05641	0.0783787	0.0783787	2.05641	258	0
ERS451417_01975	1717.62.peg.1975	NA	NA	NA	1	35	Cargentoratense_DSM44202,"Catypicum_R2070","Caurimucosum_ATCC700975","Cbelfantii_FRC0043","Ccallunae_DSM20147","Ccamporealensis_DSM44610","Cdeserti_GIMN1010","Cdiphtheriae_NCTC11397","Cdoosanense_DSM45436","Cefficiens_YS314","Cepidermidicanis_DSM45586","Cfalsenii_DSM44353","Cglutamicum_ATCC13032","Cglycinophilum_AJ3170","Chalotolerans_YIM70093","Chumireducens_DSM45392","Cimitans_DSM44264","Cjeike…	0.108713	0.108713	1.72149	0.108713	0.108713	1.72148	3330	0
ERS451417_01532	1717.62.peg.1541	NA	NA	NA	1	38	Cargentoratense_DSM44202,"Catypicum_R2070","Caurimucosum_ATCC700975","Cbelfantii_FRC0043","Ccallunae_DSM20147","Ccamporealensis_DSM44610","Cdeserti_GIMN1010","Cdiphtheriae_NCTC11397","Cdoosanense_DSM45436","Cefficiens_YS314","Cepidermidicanis_DSM45586","Cfalsenii_DSM44353","Cglutamicum_ATCC13032","Cglycinophilum_AJ3170","Chalotolerans_YIM70093","Chumireducens_DSM45392","Cimitans_DSM44264","Cjeike…	0.195642	0.195642	1.46507	0.195633	0.195633	1.46507	258	0
ERS451417_00079	1717.62.peg.76	NA	NA	NA	1	11	Cargentoratense_DSM44202,"Cbelfantii_FRC0043","Cdiphtheriae_NCTC11397","Cimitans_DSM44264","Cjeikeium_K41","Clactis_RW25","Cmustelae_DSM45274","CriegeliiPUDD83A45","Crouxii_FRC0190","Csimulans_PES1","Cureicelerivorans_IMMIBRIV2301"	0.142512	0.142512	1.57872	0.142512	0.142512	1.57872	2	3	1. 0.40195;2. 133;3. 397;4. 157;5. 157;6. 469;7. 176;8. 526;9. 271;10. N;11. AAC	1. 0.47836;2. 222;3. 664;4. 248;5. 248;6. 742;7. 267;8. 799;9. 538;10. V;11. GTG	1. 0.4324;2. 306;3. 916;4. 344;5. 338;6. 1012;7. 357;8. 1069;9. 781;10. D;11. GAT
ERS451417_00310	1717.62.peg.311	NA	NA	NA	1	39	Cargentoratense_DSM44202,"Catypicum_R2070","Caurimucosum_ATCC700975","Cbelfantii_FRC0043","Ccallunae_DSM20147","Ccamporealensis_DSM44610","Cdeserti_GIMN1010","Cdiphtheriae_NCTC11397","Cdoosanense_DSM45436","Cefficiens_YS314","Cepidermidicanis_DSM45586","Cfalsenii_DSM44353","Cglutamicum_ATCC13032","Cglycinophilum_AJ3170","Chalotolerans_YIM70093","Chumireducens_DSM45392","Cimitans_DSM44264","Cjeike…	0.18875	0.167503	1.95488	0.18875	0.167503	1.95488	1026	2	1. 0.56919;2. 59;3. 175;4. 84;5. 84;6. 250;7. 107;8. 319;9. 145;10. V;11. GTT	1. 0.6158;2. 237;3. 709;4. 282;5. 282;6. 844;7. 318;8. 952;9. 619;10. Q;11. CAG
ERS451417_00097	1717.62.peg.95	NA	NA	NA	1	31	Catypicum_R2070,"Caurimucosum_ATCC700975","Cbelfantii_FRC0043","Ccallunae_DSM20147","Ccamporealensis_DSM44610","Cdeserti_GIMN1010","Cdiphtheriae_NCTC11397","Cdoosanense_DSM45436","Cefficiens_YS314","Cepidermidicanis_DSM45586","Cglutamicum_ATCC13032","Chalotolerans_YIM70093","Chumireducens_DSM45392","Cimitans_DSM44264","Ckutscheri_DSM20755","Cmarinum_DSM44953","Cmaris_DSM45190","Cmustelae_DSM45274…	0.14937	0.143514	1.40665	0.14937	0.143513	1.40666	2050	3	1. 0.40619;2. 28;3. 82;4. 68;5. 58;6. 172;7. 85;8. 253;9. 10;10. D;11. GAT	1. 0.61209;2. 341;3. 1021;4. 401;5. 389;6. 1165;7. 416;8. 1246;9. 745;10. S;11. TCA	1. 0.59834;2. 430;3. 1288;4. 490;5. 478;6. 1432;7. 505;8. 1513;9. 964;10. R;11. CGA
ERS451417_00623	1717.62.peg.627	NA	NA	NA	1	3	Cbelfantii_FRC0043,"Cdiphtheriae_NCTC11397","Crouxii_FRC0190"	0.277195	0.277195	6.83304	0.277195	0.277195	6.83304	386	0
ERS451417_00890	1717.62.peg.896	NA	NA	NA	1	34	Cargentoratense_DSM44202,"Catypicum_R2070","Caurimucosum_ATCC700975","Cbelfantii_FRC0043","Ccallunae_DSM20147","Ccamporealensis_DSM44610","Cdeserti_GIMN1010","Cdiphtheriae_NCTC11397","Cdoosanense_DSM45436","Cefficiens_YS314","Cepidermidicanis_DSM45586","Cglutamicum_ATCC13032","Chalotolerans_YIM70093","Chumireducens_DSM45392","Cimitans_DSM44264","Ckroppenstedtii_DSM44385","Ckutscheri_DSM20755","Cl…	0.244751	0.0558295	1.59	0.125021	0.0558295	1.59	2306	0
ERS451417_01881	1717.62.peg.1882	NA	NA	NA	1	16	Cargentoratense_DSM44202,"Cbelfantii_FRC0043","Cdiphtheriae_NCTC11397","Cepidermidicanis_DSM45586","Chalotolerans_YIM70093","Chumireducens_DSM45392","Cmarinum_DSM44953","Cmustelae_DSM45274","Cpseudotuberculosis_31","Cpseudotuberculosis_ATCC19410","Csilvaticum_KL0182","Csingulare_IBSB52218","Ctestudinoris_DSM44614","Culcerans_NCTC12077","Culcerans_NCTC7910","Cvitaeruminis_DSM20294"	0.232585	0.232585	1.57109	0.232585	0.232585	1.57109	2	2	1. 0.44285;2. 76;3. 226;4. 86;5. 81;6. 241;7. 81;8. 241;9. 166;10. T;11. ACT	1. 0.4113;2. 82;3. 244;4. 92;5. 87;6. 259;7. 87;8. 259;9. 184;10. N;11. AAT
ERS451417_02165	1717.62.peg.2190	NA	NA	NA	1	14	Cbelfantii_FRC0043,"Ccallunae_DSM20147","Ccamporealensis_DSM44610","Cdeserti_GIMN1010","Cdiphtheriae_NCTC11397","Cdoosanense_DSM45436","Cefficiens_YS314","Cglutamicum_ATCC13032","Cglycinophilum_AJ3170","Chalotolerans_YIM70093","Ckutscheri_DSM20755","Clactis_RW25","Cmustelae_DSM45274","Ctestudinoris_DSM44614"	0.327142	0.327142	1.65826	0.327142	0.327142	1.65826	258	0
ERS451417_02281	1717.62.peg.2310	NA	NA	NA	1	11	Cbelfantii_FRC0043,"Ccamporealensis_DSM44610","Cdiphtheriae_NCTC11397","Cepidermidicanis_DSM45586","Cfalsenii_DSM44353","Chalotolerans_YIM70093","Chumireducens_DSM45392","Clactis_RW25","Cmarinum_DSM44953","CriegeliiPUDD83A45","Cureicelerivorans_IMMIBRIV2301"	0.297226	0.283884	1.48569	0.295766	0.283884	1.4857	258	0
ERS451417_00801	1717.62.peg.808	NA	NA	NA	1	37	Cargentoratense_DSM44202,"Catypicum_R2070","Caurimucosum_ATCC700975","Cbelfantii_FRC0043","Ccallunae_DSM20147","Ccamporealensis_DSM44610","Cdeserti_GIMN1010","Cdiphtheriae_NCTC11397","Cdoosanense_DSM45436","Cepidermidicanis_DSM45586","Cfalsenii_DSM44353","Cglutamicum_ATCC13032","Cglycinophilum_AJ3170","Chalotolerans_YIM70093","Chumireducens_DSM45392","Cimitans_DSM44264","Cjeikeium_K41","Ckroppens…	0.354584	0.354584	1.56269	0.354584	0.354584	1.56269	1282	0
ERS451417_00977	1717.62.peg.987	NA	NA	NA	1	28	Catypicum_R2070,"Caurimucosum_ATCC700975","Cbelfantii_FRC0043","Ccallunae_DSM20147","Ccamporealensis_DSM44610","Cdeserti_GIMN1010","Cdiphtheriae_NCTC11397","Cdoosanense_DSM45436","Cefficiens_YS314","Cglutamicum_ATCC13032","Chumireducens_DSM45392","Cimitans_DSM44264","Ckutscheri_DSM20755","Cmarinum_DSM44953","Cmaris_DSM45190","Cmustelae_DSM45274","Cpseudotuberculosis_31","Cpseudotuberculosis_ATCC1…	0.212826	0.212826	1.79348	0.212826	0.212826	1.79348	3074	1	1. 0.48274;2. 236;3. 706;4. 280;5. 269;6. 805;7. 304;8. 910;9. 511;10. L;11. CTA
ERS451417_00754	1717.62.peg.759	NA	NA	NA	1	39	Cargentoratense_DSM44202,"Catypicum_R2070","Caurimucosum_ATCC700975","Cbelfantii_FRC0043","Ccallunae_DSM20147","Ccamporealensis_DSM44610","Cdeserti_GIMN1010","Cdiphtheriae_NCTC11397","Cdoosanense_DSM45436","Cefficiens_YS314","Cepidermidicanis_DSM45586","Cfalsenii_DSM44353","Cglutamicum_ATCC13032","Cglycinophilum_AJ3170","Chalotolerans_YIM70093","Chumireducens_DSM45392","Cimitans_DSM44264","Cjeike…	0.48895	0.131443	2.08624	0.239876	0.131433	2.08624	258	0
ERS451417_00453	1717.62.peg.457	NA	NA	NA	1	17	Cbelfantii_FRC0043,"Ccallunae_DSM20147","Ccamporealensis_DSM44610","Cdeserti_GIMN1010","Cdiphtheriae_NCTC11397","Cepidermidicanis_DSM45586","Cglutamicum_ATCC13032","Ckroppenstedtii_DSM44385","Ckutscheri_DSM20755","Cpseudotuberculosis_31","Cpseudotuberculosis_ATCC19410","Crouxii_FRC0190","Csilvaticum_KL0182","Ctestudinoris_DSM44614","Culcerans_NCTC12077","Culcerans_NCTC7910","Cuterequi_DSM45634"	0.483281	0.164925	2.16548	0.483281	0.164925	2.16548	2050	1	1. 0.84762;2. 183;3. 547;4. 198;5. 196;6. 586;7. 197;8. 589;9. 520;10. V;11. GTC
ERS451417_02237	1717.62.peg.2262	NA	NA	NA	1	15	Caurimucosum_ATCC700975,"Cbelfantii_FRC0043","Ccamporealensis_DSM44610","Cdiphtheriae_NCTC11397","Cfalsenii_DSM44353","Cjeikeium_K41","Ckroppenstedtii_DSM44385","Clactis_RW25","Cpseudotuberculosis_31","Cpseudotuberculosis_ATCC19410","Csilvaticum_KL0182","Csimulans_PES1","Culcerans_NCTC12077","Culcerans_NCTC7910","Curealyticum_DSM7109"	0.122481	0.122481	2.10471	0.122481	0.122481	2.10471	2	2	1. 0.59815;2. 244;3. 730;4. 253;5. 251;6. 751;7. 308;8. 922;9. 523;10. L;11. CTG	1. 0.58033;2. 274;3. 820;4. 290;5. 286;6. 856;7. 345;8. 1033;9. 595;10. K;11. AAG
ERS451417_01965	1717.62.peg.1965	NA	NA	NA	1	10	Cbelfantii_FRC0043,"Cdiphtheriae_NCTC11397","Ckutscheri_DSM20755","Cmustelae_DSM45274","Cpseudotuberculosis_31","Cpseudotuberculosis_ATCC19410","Csilvaticum_KL0182","Culcerans_NCTC12077","Culcerans_NCTC7910","Cvitaeruminis_DSM20294"	0.119847	0.070645	2.30574	0.119857	0.070645	2.30574	2	2	1. 0.5427;2. 103;3. 307;4. 103;5. 103;6. 307;7. 104;8. 310;9. 187;10. I;11. ATT	1. 0.44195;2. 178;3. 532;4. 178;5. 178;6. 532;7. 179;8. 535;9. 412;10. T;11. ACA
ERS451417_00704	1717.62.peg.709	NA	NA	NA	1	38	Cargentoratense_DSM44202,"Catypicum_R2070","Caurimucosum_ATCC700975","Cbelfantii_FRC0043","Ccallunae_DSM20147","Ccamporealensis_DSM44610","Cdeserti_GIMN1010","Cdiphtheriae_NCTC11397","Cdoosanense_DSM45436","Cefficiens_YS314","Cepidermidicanis_DSM45586","Cfalsenii_DSM44353","Cglutamicum_ATCC13032","Cglycinophilum_AJ3170","Chalotolerans_YIM70093","Chumireducens_DSM45392","Cimitans_DSM44264","Cjeike…	0.120438	0.120428	2.00393	0.120438	0.120438	2.00393	1282	0
ERS451417_01725	1717.62.peg.1728	NA	NA	NA	1	6	Cbelfantii_FRC0043,"Cdiphtheriae_NCTC11397","Cpseudotuberculosis_ATCC19410","Csilvaticum_KL0182","Culcerans_NCTC12077","Culcerans_NCTC7910"	0.271988	0.268933	3.23681	0.268943	0.268933	3.23681	2306	0
ERS451417_00086	1717.62.peg.83	NA	NA	NA	1	26	Cbelfantii_FRC0043,"Ccallunae_DSM20147","Ccamporealensis_DSM44610","Cdeserti_GIMN1010","Cdiphtheriae_NCTC11397","Cefficiens_YS314","Cepidermidicanis_DSM45586","Cfalsenii_DSM44353","Cglutamicum_ATCC13032","Cglycinophilum_AJ3170","Chalotolerans_YIM70093","Chumireducens_DSM45392","Cjeikeium_K41","Ckroppenstedtii_DSM44385","Clactis_RW25","Cmarinum_DSM44953","Cmaris_DSM45190","Cpseudotuberculosis_31",…	0.631769	0.142374	1.55854	0.143338	0.143338	1.55043	258	0
ERS451417_00210	1717.62.peg.207	NA	NA	NA	1	6	Cbelfantii_FRC0043,"Cdiphtheriae_NCTC11397","Cmustelae_DSM45274","Cpseudotuberculosis_31","Cpseudotuberculosis_ATCC19410","Crouxii_FRC0190"	0.173935	0.117594	4.35692	0.155759	0.117542	4.34943	2	4	1. 0.64012;2. 272;3. 814;4. 287;5. 287;6. 859;7. 293;8. 877;9. 646;10. F;11. TTC	1. 0.41529;2. 364;3. 1090;4. 379;5. 379;6. 1135;7. 385;8. 1153;9. 922;10. L;11. TTG	1. 0.67714;2. 370;3. 1108;4. 385;5. 385;6. 1153;7. 391;8. 1171;9. 940;10. Y;11. TAC	1. 0.66981;2. 427;3. 1279;4. 442;5. 442;6. 1324;7. 448;8. 1342;9. 1111;10. Q;11. CAG
ERS451417_00237	1717.62.peg.233	NA	NA	NA	1	13	Caurimucosum_ATCC700975,"Cbelfantii_FRC0043","Cdiphtheriae_NCTC11397","Chalotolerans_YIM70093","Chumireducens_DSM45392","Cmarinum_DSM44953","Cmaris_DSM45190","Cpseudotuberculosis_31","Cpseudotuberculosis_ATCC19410","Crouxii_FRC0190","Csingulare_IBSB52218","Culcerans_NCTC12077","Culcerans_NCTC7910"	0.327586	0.271168	2.01937	0.327586	0.271168	2.01937	2050	2	1. 0.65537;2. 49;3. 145;4. 90;5. 49;6. 145;7. 57;8. 169;9. 43;10. N;11. AAC	1. 0.66967;2. 150;3. 448;4. 198;5. 152;6. 454;7. 160;8. 478;9. 343;10. V;11. GTG
ERS451417_00247	1717.62.peg.242	NA	NA	NA	1	8	Caurimucosum_ATCC700975,"Cbelfantii_FRC0043","Cdiphtheriae_NCTC11397","Cdoosanense_DSM45436","Crouxii_FRC0190","Culcerans_NCTC12077","Culcerans_NCTC7910","Cuterequi_DSM45634"	0.440519	0.440519	2.64746	0.440519	0.440519	2.64746	2	1	1. 0.42796;2. 25;3. 73;4. 37;5. 29;6. 85;7. 30;8. 88;9. 58;10. I;11. ATA
ERS451417_02054	1717.62.peg.2066	NA	NA	NA	1	10	Cbelfantii_FRC0043,"Cdiphtheriae_NCTC11397","Cepidermidicanis_DSM45586","Cmustelae_DSM45274","Cpseudotuberculosis_31","Cpseudotuberculosis_ATCC19410","Csilvaticum_KL0182","Culcerans_NCTC12077","Culcerans_NCTC7910","Cvitaeruminis_DSM20294"	0.0654106	0.0654106	2.26801	0.0856128	0.0654154	2.27288	2	1	1. 0.48633;2. 338;3. 1012;4. 487;5. 399;6. 1195;7. 407;8. 1219;9. 829;10. E;11. GAA
ERS451417_01324	1717.62.peg.1332	NA	NA	NA	1	37	Cargentoratense_DSM44202,"Catypicum_R2070","Caurimucosum_ATCC700975","Cbelfantii_FRC0043","Ccallunae_DSM20147","Ccamporealensis_DSM44610","Cdeserti_GIMN1010","Cdiphtheriae_NCTC11397","Cdoosanense_DSM45436","Cefficiens_YS314","Cepidermidicanis_DSM45586","Cfalsenii_DSM44353","Cglutamicum_ATCC13032","Cglycinophilum_AJ3170","Chalotolerans_YIM70093","Chumireducens_DSM45392","Cimitans_DSM44264","Cjeike…	0.271693	0.207578	1.77903	0.271693	0.207578	1.77903	3074	3	1. 0.74164;2. 82;3. 244;4. 111;5. 90;6. 268;7. 127;8. 379;9. 121;10. S;11. TCC	1. 0.75773;2. 120;3. 358;4. 149;5. 128;6. 382;7. 165;8. 493;9. 235;10. V;11. GTA	1. 0.73425;2. 510;3. 1528;4. 602;5. 580;6. 1738;7. 724;8. 2170;9. 1165;10. S;11. AGC
ERS451417_00495	1717.62.peg.498	NA	NA	NA	1	39	Cargentoratense_DSM44202,"Catypicum_R2070","Caurimucosum_ATCC700975","Cbelfantii_FRC0043","Ccallunae_DSM20147","Ccamporealensis_DSM44610","Cdeserti_GIMN1010","Cdiphtheriae_NCTC11397","Cdoosanense_DSM45436","Cefficiens_YS314","Cepidermidicanis_DSM45586","Cfalsenii_DSM44353","Cglutamicum_ATCC13032","Cglycinophilum_AJ3170","Chalotolerans_YIM70093","Chumireducens_DSM45392","Cimitans_DSM44264","Cjeike…	0.251446	0.147843	2.07638	0.255334	0.147377	2.07741	2	1	1. 0.80164;2. 123;3. 367;4. 182;5. 182;6. 544;7. 197;8. 589;9. 361;10. R;11. CGC
ERS451417_00572	1717.62.peg.575	NA	NA	NA	1	38	Cargentoratense_DSM44202,"Catypicum_R2070","Caurimucosum_ATCC700975","Cbelfantii_FRC0043","Ccallunae_DSM20147","Ccamporealensis_DSM44610","Cdeserti_GIMN1010","Cdiphtheriae_NCTC11397","Cdoosanense_DSM45436","Cefficiens_YS314","Cepidermidicanis_DSM45586","Cfalsenii_DSM44353","Cglutamicum_ATCC13032","Cglycinophilum_AJ3170","Chalotolerans_YIM70093","Chumireducens_DSM45392","Cimitans_DSM44264","Cjeike…	0.14858	0.14858	1.47854	0.14858	0.14858	1.47854	3074	1	1. 0.56533;2. 147;3. 439;4. 169;5. 168;6. 502;7. 185;8. 553;9. 256;10. N;11. AAC
ERS451417_00732	1717.62.peg.735	NA	NA	NA	1	39	Cargentoratense_DSM44202,"Catypicum_R2070","Caurimucosum_ATCC700975","Cbelfantii_FRC0043","Ccallunae_DSM20147","Ccamporealensis_DSM44610","Cdeserti_GIMN1010","Cdiphtheriae_NCTC11397","Cdoosanense_DSM45436","Cefficiens_YS314","Cepidermidicanis_DSM45586","Cfalsenii_DSM44353","Cglutamicum_ATCC13032","Cglycinophilum_AJ3170","Chalotolerans_YIM70093","Chumireducens_DSM45392","Cimitans_DSM44264","Cjeike…	0.221274	0.178037	1.7206	0.221274	0.178037	1.7206	2	2	1. 0.61078;2. 81;3. 241;4. 93;5. 93;6. 277;7. 144;8. 430;9. 211;10. K;11. AAG	1. 0.65434;2. 259;3. 775;4. 271;5. 271;6. 811;7. 322;8. 964;9. 745;10. N;11. AAT
ERS451417_00130	1717.62.peg.129	NA	NA	NA	1	3	Cbelfantii_FRC0043,"Cdiphtheriae_NCTC11397","Crouxii_FRC0190"	0.2868	0.2868	4.88399	0.2868	0.2868	4.88399	130	2	1. 0.44089;2. 37;3. 109;4. 107;5. 91;6. 271;7. 91;8. 271;9. 109;10. S;11. TCG	1. 0.74737;2. 88;3. 262;4. 180;5. 142;6. 424;7. 142;8. 424;9. 262;10. V;11. GTG
ERS451417_00931	1717.62.peg.938	NA	NA	NA	1	36	Catypicum_R2070,"Caurimucosum_ATCC700975","Cbelfantii_FRC0043","Ccallunae_DSM20147","Ccamporealensis_DSM44610","Cdeserti_GIMN1010","Cdiphtheriae_NCTC11397","Cdoosanense_DSM45436","Cefficiens_YS314","Cepidermidicanis_DSM45586","Cfalsenii_DSM44353","Cglutamicum_ATCC13032","Cglycinophilum_AJ3170","Chalotolerans_YIM70093","Chumireducens_DSM45392","Cjeikeium_K41","Ckroppenstedtii_DSM44385","Ckutscheri…	0.216748	0.216748	1.49608	0.216758	0.216758	1.49608	3074	2	1. 0.66133;2. 69;3. 205;4. 91;5. 91;6. 271;7. 113;8. 337;9. 130;10. V;11. GTT	1. 0.52674;2. 148;3. 442;4. 170;5. 170;6. 508;7. 193;8. 577;9. 328;10. N;11. AAC
ERS451417_01718	1717.62.peg.1721	NA	NA	NA	1	38	Cargentoratense_DSM44202,"Catypicum_R2070","Caurimucosum_ATCC700975","Cbelfantii_FRC0043","Ccallunae_DSM20147","Ccamporealensis_DSM44610","Cdeserti_GIMN1010","Cdiphtheriae_NCTC11397","Cdoosanense_DSM45436","Cefficiens_YS314","Cepidermidicanis_DSM45586","Cfalsenii_DSM44353","Cglutamicum_ATCC13032","Cglycinophilum_AJ3170","Chalotolerans_YIM70093","Chumireducens_DSM45392","Cimitans_DSM44264","Cjeike…	0.210831	0.210831	1.53517	0.210831	0.210831	1.53517	258	0
ERS451417_01451	1717.62.peg.1458	NA	NA	NA	1	10	Cbelfantii_FRC0043,"Cdiphtheriae_NCTC11397","Ckutscheri_DSM20755","Cmustelae_DSM45274","Cpseudotuberculosis_31","Cpseudotuberculosis_ATCC19410","Csilvaticum_KL0182","Culcerans_NCTC12077","Culcerans_NCTC7910","Cvitaeruminis_DSM20294"	0.919887	0.138954	2.4569	0.138964	0.138954	2.45689	256	0
ERS451417_00609	1717.62.peg.613	NA	NA	NA	1	6	Cbelfantii_FRC0043,"Cdiphtheriae_NCTC11397","Cepidermidicanis_DSM45586","Clactis_RW25","Cmustelae_DSM45274","Cvitaeruminis_DSM20294"	0.207345	0.207345	1.84626	0.207345	0.207345	1.84625	2	2	1. 0.65422;2. 363;3. 1087;4. 364;5. 364;6. 1090;7. 364;8. 1090;9. 1081;10. T;11. ACC	1. 0.42871;2. 420;3. 1258;4. 421;5. 421;6. 1261;7. 421;8. 1261;9. 1252;10. M;11. ATG
ERS451417_00488	1717.62.peg.491	NA	NA	NA	1	3	Cbelfantii_FRC0043,"Cdiphtheriae_NCTC11397","Crouxii_FRC0190"	0.13575	0.13575	4.90028	0.13575	0.13575	4.90028	130	4	1. 0.44205;2. 19;3. 55;4. 44;5. 19;6. 55;7. 19;8. 55;9. 55;10. F;11. TTC	1. 0.44058;2. 38;3. 112;4. 64;5. 38;6. 112;7. 38;8. 112;9. 112;10. K;11. AAG	1. 0.42821;2. 192;3. 574;4. 371;5. 192;6. 574;7. 192;8. 574;9. 574;10. I;11. ATT	1. 0.4331;2. 341;3. 1021;4. 568;5. 341;6. 1021;7. 341;8. 1021;9. 1021;10. V;11. GTC
ERS451417_01154	1717.62.peg.1165	NA	NA	NA	1	39	Cargentoratense_DSM44202,"Catypicum_R2070","Caurimucosum_ATCC700975","Cbelfantii_FRC0043","Ccallunae_DSM20147","Ccamporealensis_DSM44610","Cdeserti_GIMN1010","Cdiphtheriae_NCTC11397","Cdoosanense_DSM45436","Cefficiens_YS314","Cepidermidicanis_DSM45586","Cfalsenii_DSM44353","Cglutamicum_ATCC13032","Cglycinophilum_AJ3170","Chalotolerans_YIM70093","Chumireducens_DSM45392","Cimitans_DSM44264","Cjeike…	0.521376	0.13304	2.19009	0.245262	0.13304	2.19008	258	0
ERS451417_01693	1717.62.peg.1700	NA	NA	NA	1	9	Cbelfantii_FRC0043,"Cdiphtheriae_NCTC11397","Cefficiens_YS314","Cepidermidicanis_DSM45586","Cmustelae_DSM45274","Cpseudotuberculosis_ATCC19410","Csilvaticum_KL0182","Culcerans_NCTC7910","Cvitaeruminis_DSM20294"	0.385295	0.384504	2.31401	0.385295	0.384504	2.31401	2050	2	1. 0.50422;2. 109;3. 325;4. 193;5. 138;6. 412;7. 149;8. 445;9. 268;10. Q;11. CAG	1. 0.51371;2. 315;3. 943;4. 452;5. 363;6. 1087;7. 390;8. 1168;9. 739;10. E;11. GAG
ERS451417_01744	1717.62.peg.1747	NA	NA	NA	1	7	Cbelfantii_FRC0043,"Cdiphtheriae_NCTC11397","Cpseudotuberculosis_31","Cpseudotuberculosis_ATCC19410","Csilvaticum_KL0182","Culcerans_NCTC12077","Culcerans_NCTC7910"	0.253244	0.245059	3.57707	1	0.225389	3.57686	258	0
ERS451417_00868	1717.62.peg.873	NA	NA	NA	1	8	Cbelfantii_FRC0043,"Cdiphtheriae_NCTC11397","Cpseudotuberculosis_31","Cpseudotuberculosis_ATCC19410","Crouxii_FRC0190","Csilvaticum_KL0182","Culcerans_NCTC12077","Culcerans_NCTC7910"	0.152763	0.120122	3.00789	0.152763	0.120122	3.00789	2	1	1. 0.65041;2. 127;3. 379;4. 172;5. 127;6. 379;7. 127;8. 379;9. 259;10. T;11. ACC
ERS451417_01869	1717.62.peg.1871	NA	NA	NA	1	38	Cargentoratense_DSM44202,"Catypicum_R2070","Caurimucosum_ATCC700975","Cbelfantii_FRC0043","Ccallunae_DSM20147","Ccamporealensis_DSM44610","Cdeserti_GIMN1010","Cdiphtheriae_NCTC11397","Cdoosanense_DSM45436","Cefficiens_YS314","Cepidermidicanis_DSM45586","Cfalsenii_DSM44353","Cglutamicum_ATCC13032","Cglycinophilum_AJ3170","Chalotolerans_YIM70093","Chumireducens_DSM45392","Cimitans_DSM44264","Cjeike…	0.152881	0.152881	1.34425	0.152881	0.152881	1.34424	2306	0
ERS451417_00351	1717.62.peg.354	NA	NA	NA	1	39	Cargentoratense_DSM44202,"Catypicum_R2070","Caurimucosum_ATCC700975","Cbelfantii_FRC0043","Ccallunae_DSM20147","Ccamporealensis_DSM44610","Cdeserti_GIMN1010","Cdiphtheriae_NCTC11397","Cdoosanense_DSM45436","Cefficiens_YS314","Cepidermidicanis_DSM45586","Cfalsenii_DSM44353","Cglutamicum_ATCC13032","Cglycinophilum_AJ3170","Chalotolerans_YIM70093","Chumireducens_DSM45392","Cimitans_DSM44264","Cjeike…	0.250681	0.250681	1.77223	0.250681	0.250681	1.77223	1282	0
ERS451417_00200	1717.62.peg.197	NA	NA	NA	1	39	Cargentoratense_DSM44202,"Catypicum_R2070","Caurimucosum_ATCC700975","Cbelfantii_FRC0043","Ccallunae_DSM20147","Ccamporealensis_DSM44610","Cdeserti_GIMN1010","Cdiphtheriae_NCTC11397","Cdoosanense_DSM45436","Cefficiens_YS314","Cepidermidicanis_DSM45586","Cfalsenii_DSM44353","Cglutamicum_ATCC13032","Cglycinophilum_AJ3170","Chalotolerans_YIM70093","Chumireducens_DSM45392","Cimitans_DSM44264","Cjeike…	0.194221	0.194221	2.03233	0.194221	0.194221	2.03233	2	1	1. 0.48699;2. 149;3. 445;4. 152;5. 152;6. 454;7. 152;8. 454;9. 424;10. A;11. GCG
ERS451417_01351	1717.62.peg.1359	NA	NA	NA	1	38	Cargentoratense_DSM44202,"Catypicum_R2070","Caurimucosum_ATCC700975","Cbelfantii_FRC0043","Ccallunae_DSM20147","Ccamporealensis_DSM44610","Cdeserti_GIMN1010","Cdiphtheriae_NCTC11397","Cdoosanense_DSM45436","Cefficiens_YS314","Cepidermidicanis_DSM45586","Cfalsenii_DSM44353","Cglutamicum_ATCC13032","Cglycinophilum_AJ3170","Chalotolerans_YIM70093","Chumireducens_DSM45392","Cimitans_DSM44264","Cjeike…	0.139832	0.139832	1.555	0.139832	0.139832	1.55499	1282	0
ERS451417_01396	1717.62.peg.1409	NA	NA	NA	1	3	Cbelfantii_FRC0043,"Cdiphtheriae_NCTC11397","Cjeikeium_K41"	0.327256	0.326066	2.98001	0.327155	0.326056	2.98001	386	0
ERS451417_00230	1717.62.peg.226	NA	NA	NA	1	38	Cargentoratense_DSM44202,"Catypicum_R2070","Caurimucosum_ATCC700975","Cbelfantii_FRC0043","Ccallunae_DSM20147","Ccamporealensis_DSM44610","Cdeserti_GIMN1010","Cdiphtheriae_NCTC11397","Cdoosanense_DSM45436","Cefficiens_YS314","Cepidermidicanis_DSM45586","Cfalsenii_DSM44353","Cglutamicum_ATCC13032","Cglycinophilum_AJ3170","Chalotolerans_YIM70093","Chumireducens_DSM45392","Cimitans_DSM44264","Cjeike…	0.184775	0.184775	1.97092	0.184775	0.184775	1.97092	3330	0
ERS451417_00613	1717.62.peg.617	NA	NA	NA	1	3	Cbelfantii_FRC0043,"Cdiphtheriae_NCTC11397","Cepidermidicanis_DSM45586"	1	0.313046	5.3861	0.999662	0.313036	5.38622	128	1	1. 0.5638;2. 80;3. 238;4. 94;5. 88;6. 262;7. 88;8. 262;9. 238;10. Q;11. CAA
ERS451417_01630	1717.62.peg.1637	NA	NA	NA	1	37	Cargentoratense_DSM44202,"Catypicum_R2070","Caurimucosum_ATCC700975","Cbelfantii_FRC0043","Ccallunae_DSM20147","Ccamporealensis_DSM44610","Cdeserti_GIMN1010","Cdiphtheriae_NCTC11397","Cdoosanense_DSM45436","Cefficiens_YS314","Cepidermidicanis_DSM45586","Cfalsenii_DSM44353","Cglutamicum_ATCC13032","Cglycinophilum_AJ3170","Chalotolerans_YIM70093","Cimitans_DSM44264","Cjeikeium_K41","Ckroppenstedtii…	0.0523978	0.0523978	1.72669	0.0523978	0.0523978	1.72669	258	0
ERS451417_02163	1717.62.peg.2188	NA	NA	NA	1	4	Cbelfantii_FRC0043,"Cdiphtheriae_NCTC11397","Ckutscheri_DSM20755","Clactis_RW25"	16.26	0.241867	2.05481	0.242213	0.241867	2.0548	3328	0
ERS451417_00579	1717.62.peg.582	NA	NA	NA	1	33	Cargentoratense_DSM44202,"Catypicum_R2070","Caurimucosum_ATCC700975","Cbelfantii_FRC0043","Ccallunae_DSM20147","Ccamporealensis_DSM44610","Cdeserti_GIMN1010","Cdiphtheriae_NCTC11397","Cdoosanense_DSM45436","Cefficiens_YS314","Cepidermidicanis_DSM45586","Cglutamicum_ATCC13032","Cglycinophilum_AJ3170","Chalotolerans_YIM70093","Chumireducens_DSM45392","Cimitans_DSM44264","Ckroppenstedtii_DSM44385","…	0.158205	0.158205	2.07866	0.158205	0.158205	2.07867	2	2	1. 0.51527;2. 115;3. 343;4. 121;5. 121;6. 361;7. 164;8. 490;9. 292;10. I;11. ATA	1. 0.47889;2. 1124;3. 3370;4. 1155;5. 1155;6. 3463;7. 1234;8. 3700;9. 3121;10. D;11. GAC
ERS451417_00965	1717.62.peg.972	NA	NA	NA	1	39	Cargentoratense_DSM44202,"Catypicum_R2070","Caurimucosum_ATCC700975","Cbelfantii_FRC0043","Ccallunae_DSM20147","Ccamporealensis_DSM44610","Cdeserti_GIMN1010","Cdiphtheriae_NCTC11397","Cdoosanense_DSM45436","Cefficiens_YS314","Cepidermidicanis_DSM45586","Cfalsenii_DSM44353","Cglutamicum_ATCC13032","Cglycinophilum_AJ3170","Chalotolerans_YIM70093","Chumireducens_DSM45392","Cimitans_DSM44264","Cjeike…	0.193433	0.122889	1.70865	0.193433	0.122889	1.70865	3074	1	1. 0.78458;2. 153;3. 457;4. 181;5. 181;6. 541;7. 228;8. 682;9. 241;10. S;11. TCC
ERS451417_00048	1717.62.peg.44	NA	NA	NA	1	35	Cargentoratense_DSM44202,"Catypicum_R2070","Caurimucosum_ATCC700975","Cbelfantii_FRC0043","Ccamporealensis_DSM44610","Cdeserti_GIMN1010","Cdiphtheriae_NCTC11397","Cdoosanense_DSM45436","Cefficiens_YS314","Cfalsenii_DSM44353","Cglycinophilum_AJ3170","Chalotolerans_YIM70093","Chumireducens_DSM45392","Cimitans_DSM44264","Cjeikeium_K41","Ckroppenstedtii_DSM44385","Clactis_RW25","Cmarinum_DSM44953","C…	0.114495	0.114495	1.9175	0.114495	0.114495	1.9175	3330	0
ERS451417_00778	1717.62.peg.785	NA	NA	NA	1	39	Cargentoratense_DSM44202,"Catypicum_R2070","Caurimucosum_ATCC700975","Cbelfantii_FRC0043","Ccallunae_DSM20147","Ccamporealensis_DSM44610","Cdeserti_GIMN1010","Cdiphtheriae_NCTC11397","Cdoosanense_DSM45436","Cefficiens_YS314","Cepidermidicanis_DSM45586","Cfalsenii_DSM44353","Cglutamicum_ATCC13032","Cglycinophilum_AJ3170","Chalotolerans_YIM70093","Chumireducens_DSM45392","Cimitans_DSM44264","Cjeike…	0.19139	0.19139	1.82949	0.19139	0.19139	1.82949	3330	0
ERS451417_00791	1717.62.peg.798	NA	NA	NA	1	3	Cbelfantii_FRC0043,"Cdiphtheriae_NCTC11397","Crouxii_FRC0190"	0.083	0.083	4.0174	0.116073	0.07758	4.02459	130	5	1. 0.4891;2. 58;3. 172;4. 112;5. 58;6. 172;7. 58;8. 172;9. 172;10. I;11. ATC	1. 0.49735;2. 234;3. 700;4. 310;5. 234;6. 700;7. 234;8. 700;9. 700;10. R;11. CGC	1. 0.52516;2. 347;3. 1039;4. 432;5. 347;6. 1039;7. 347;8. 1039;9. 1039;10. S;11. TCT	1. 0.54316;2. 395;3. 1183;4. 484;5. 395;6. 1183;7. 395;8. 1183;9. 1183;10. R;11. AGG	1. 0.52137;2. 414;3. 1240;4. 504;5. 414;6. 1240;7. 414;8. 1240;9. 1240;10. R;11. AGG
ERS451417_00016	1717.62.peg.16	NA	NA	NA	1	3	Cbelfantii_FRC0043,"Cdiphtheriae_NCTC11397","Cmustelae_DSM45274"	0.999315	0.323041	5.19892	1	0.323041	5.19869	128	21	1. 0.73061;2. 27;3. 79;4. 27;5. 27;6. 79;7. 41;8. 121;9. 1;10. R;11. AGG	1. 0.7311;2. 28;3. 82;4. 28;5. 28;6. 82;7. 42;8. 124;9. 4;10. Q;11. CAG	1. 0.91511;2. 61;3. 181;4. 65;5. 64;6. 190;7. 78;8. 232;9. 100;10. G;11. GGT	1. 0.61882;2. 62;3. 184;4. 66;5. 65;6. 193;7. 79;8. 235;9. 103;10. G;11. GGG	1. 0.85223;2. 69;3. 205;4. 77;5. 72;6. 214;7. 86;8. 256;9. 124;10. V;11. GTG	1. 0.60425;2. 87;3. 259;4. 95;5. 90;6. 268;7. 104;8. 310;9. 178;10. G;11. GGC	1. 0.82354;2. 185;3. 553;4. 247;5. 188;6. 562;7. 204;8. 610;9. 442;10. M;11. ATG	1. 0.60195;2. 187;3. 559;4. 249;5. 190;6. 568;7. 206;8. 616;9. 448;10. A;11. GCG	1. 0.75566;2. 199;3. 595;4. 261;5. 202;6. 604;7. 218;8. 652;9. 484;10. A;11. GCG	1. 0.7598;2. 221;3. 661;4. 283;5. 224;6. 670;7. 240;8. 718;9. 550;10. S;11. TCA	1. 0.76911;2. 251;3. 751;4. 313;5. 254;6. 760;7. 270;8. 808;9. 640;10. V;11. GTT	1. 0.65554;2. 286;3. 856;4. 348;5. 289;6. 865;7. 305;8. 913;9. 745;10. I;11. ATA	1. 0.77149;2. 299;3. 895;4. 361;5. 302;6. 904;7. 318;8. 952;9. 784;10. V;11. GTC	1. 0.61642;2. 317;3. 949;4. 379;5. 320;6. 958;7. 336;8. 1006;9. 838;10. H;11. CAC	1. 0.85075;2. 333;3. 997;4. 407;5. 345;6. 1033;7. 361;8. 1081;9. 874;10. T;11. ACC	1. 0.80797;2. 341;3. 1021;4. 417;5. 355;6. 1063;7. 371;8. 1111;9. 898;10. Q;11. CAA	1. 0.89159;2. 350;3. 1048;4. 426;5. 364;6. 1090;7. 380;8. 1138;9. 925;10. C;11. TGC	1. 0.90316;2. 393;3. 1177;4. 470;5. 407;6. 1219;7. 423;8. 1267;9. 1051;10. A;11. GCG	1. 0.71026;2. 494;3. 1480;4. 584;5. 516;6. 1546;7. 532;8. 1594;9. 1348;10. A;11. GCC	1. 0.67639;2. 499;3. 1495;4. 589;5. 521;6. 1561;7. 537;8. 1609;9. 1363;10. I;11. ATC	1. 0.6589;2. 505;3. 1513;4. 595;5. 527;6. 1579;7. 543;8. 1627;9. 1381;10. N;11. AAC
ERS451417_01755	1717.62.peg.1758	NA	NA	NA	1	35	Caurimucosum_ATCC700975,"Cbelfantii_FRC0043","Ccallunae_DSM20147","Ccamporealensis_DSM44610","Cdeserti_GIMN1010","Cdiphtheriae_NCTC11397","Cdoosanense_DSM45436","Cefficiens_YS314","Cepidermidicanis_DSM45586","Cfalsenii_DSM44353","Cglutamicum_ATCC13032","Cglycinophilum_AJ3170","Chalotolerans_YIM70093","Chumireducens_DSM45392","Cimitans_DSM44264","Cjeikeium_K41","Ckutscheri_DSM20755","Clactis_RW25"…	0.216723	0.216723	1.69755	0.216723	0.216723	1.69755	3330	0
ERS451417_02106	1717.62.peg.2121	NA	NA	NA	1	4	Cdiphtheriae_NCTC11397,"Ckroppenstedtii_DSM44385","Csimulans_PES1","Csingulare_IBSB52218"	0.205244	0.205244	1.98296	0.205244	0.205244	1.98295	4354	0
ERS451417_00796	1717.62.peg.802	NA	NA	NA	1	39	Cargentoratense_DSM44202,"Catypicum_R2070","Caurimucosum_ATCC700975","Cbelfantii_FRC0043","Ccallunae_DSM20147","Ccamporealensis_DSM44610","Cdeserti_GIMN1010","Cdiphtheriae_NCTC11397","Cdoosanense_DSM45436","Cefficiens_YS314","Cepidermidicanis_DSM45586","Cfalsenii_DSM44353","Cglutamicum_ATCC13032","Cglycinophilum_AJ3170","Chalotolerans_YIM70093","Chumireducens_DSM45392","Cimitans_DSM44264","Cjeike…	0.0981814	0.0981814	1.96437	0.0981814	0.0981814	1.96438	258	0
ERS451417_00894	1717.62.peg.900	NA	NA	NA	1	36	Cargentoratense_DSM44202,"Catypicum_R2070","Caurimucosum_ATCC700975","Cbelfantii_FRC0043","Ccallunae_DSM20147","Ccamporealensis_DSM44610","Cdeserti_GIMN1010","Cdiphtheriae_NCTC11397","Cdoosanense_DSM45436","Cefficiens_YS314","Cepidermidicanis_DSM45586","Cfalsenii_DSM44353","Cglutamicum_ATCC13032","Chalotolerans_YIM70093","Chumireducens_DSM45392","Cimitans_DSM44264","Cjeikeium_K41","Ckroppenstedti…	0.126222	0.119738	1.8979	0.126222	0.119738	1.8979	2	1	1. 0.70235;2. 372;3. 1114;4. 404;5. 404;6. 1210;7. 423;8. 1267;9. 901;10. D;11. GAC
ERS451417_02024	1717.62.peg.2029	NA	NA	NA	1	12	Cargentoratense_DSM44202,"Cdiphtheriae_NCTC11397","Cdoosanense_DSM45436","Cefficiens_YS314","Cepidermidicanis_DSM45586","Ckutscheri_DSM20755","Cpseudotuberculosis_31","Cpseudotuberculosis_ATCC19410","Csilvaticum_KL0182","Culcerans_NCTC12077","Culcerans_NCTC7910","Cureicelerivorans_IMMIBRIV2301"	0.327782	0.126522	2.3668	0.327782	0.126522	2.3668	6146	14	1. 0.63349;2. 17;3. 49;4. 50;5. 22;6. 64;7. 23;8. 67;9. 34;10. A;11. GCG	1. 0.69525;2. 24;3. 70;4. 57;5. 29;6. 85;7. 30;8. 88;9. 55;10. L;11. TTG	1. 0.67163;2. 28;3. 82;4. 61;5. 33;6. 97;7. 34;8. 100;9. 67;10. S;11. AGC	1. 0.58742;2. 35;3. 103;4. 71;5. 40;6. 118;7. 41;8. 121;9. 88;10. Y;11. TAT	1. 0.78679;2. 36;3. 106;4. 72;5. 41;6. 121;7. 42;8. 124;9. 91;10. S;11. TCG	1. 0.70079;2. 38;3. 112;4. 74;5. 43;6. 127;7. 44;8. 130;9. 97;10. R;11. CGT	1. 0.66432;2. 46;3. 136;4. 82;5. 51;6. 151;7. 52;8. 154;9. 121;10. G;11. GGT	1. 0.8173;2. 60;3. 178;4. 96;5. 65;6. 193;7. 67;8. 199;9. 151;10. A;11. GCT	1. 0.4196;2. 80;3. 238;4. 116;5. 85;6. 253;7. 87;8. 259;9. 211;10. H;11. CAT	1. 0.49386;2. 84;3. 250;4. 120;5. 89;6. 265;7. 91;8. 271;9. 223;10. R;11. CGC	1. 0.61999;2. 98;3. 292;4. 134;5. 103;6. 307;7. 105;8. 313;9. 265;10. H;11. CAT	1. 0.47334;2. 99;3. 295;4. 135;5. 104;6. 310;7. 106;8. 316;9. 268;10. I;11. ATT	1. 0.78169;2. 102;3. 304;4. 138;5. 107;6. 319;7. 109;8. 325;9. 277;10. S;11. TCG	1. 0.51945;2. 106;3. 316;4. 142;5. 111;6. 331;7. 113;8. 337;9. 289;10. L;11. TTG
ERS451417_01490	1717.62.peg.1498	NA	NA	NA	1	36	Cargentoratense_DSM44202,"Catypicum_R2070","Caurimucosum_ATCC700975","Cbelfantii_FRC0043","Ccallunae_DSM20147","Ccamporealensis_DSM44610","Cdeserti_GIMN1010","Cdiphtheriae_NCTC11397","Cdoosanense_DSM45436","Cefficiens_YS314","Cepidermidicanis_DSM45586","Cfalsenii_DSM44353","Cglutamicum_ATCC13032","Cglycinophilum_AJ3170","Chalotolerans_YIM70093","Chumireducens_DSM45392","Cimitans_DSM44264","Cjeike…	0.179392	0.179392	1.70349	0.179392	0.179392	1.7035	2306	0
ERS451417_02322	1717.62.peg.2349	NA	NA	NA	1	11	Cbelfantii_FRC0043,"Cdiphtheriae_NCTC11397","Cepidermidicanis_DSM45586","Ckutscheri_DSM20755","Cmustelae_DSM45274","Cpseudotuberculosis_31","Cpseudotuberculosis_ATCC19410","Csilvaticum_KL0182","Culcerans_NCTC12077","Culcerans_NCTC7910","Cvitaeruminis_DSM20294"	0.985628	0.271052	2.29888	0.999454	0.271036	2.29881	2048	3	1. 0.89726;2. 98;3. 292;4. 137;5. 100;6. 298;7. 108;8. 322;9. 79;10. S;11. TCC	1. 0.93214;2. 149;3. 445;4. 203;5. 151;6. 451;7. 159;8. 475;9. 232;10. V;11. GTA	1. 0.88605;2. 182;3. 544;4. 238;5. 184;6. 550;7. 192;8. 574;9. 331;10. Y;11. TAC
ERS451417_00722	1717.62.peg.727	NA	NA	NA	1	19	Caurimucosum_ATCC700975,"Cbelfantii_FRC0043","Ccamporealensis_DSM44610","Cdiphtheriae_NCTC11397","Cfalsenii_DSM44353","Cglycinophilum_AJ3170","Ckroppenstedtii_DSM44385","Ckutscheri_DSM20755","Cmustelae_DSM45274","Cpseudotuberculosis_31","Cpseudotuberculosis_ATCC19410","Crouxii_FRC0190","Csilvaticum_KL0182","Csimulans_PES1","Csingulare_IBSB52218","Cterpenotabidum_Y11","Culcerans_NCTC12077","Culcer…	0.109239	0.0803452	1.98007	0.106317	0.0801244	1.99194	2	3	1. 0.57745;2. 16;3. 46;4. 42;5. 42;6. 124;7. 93;8. 277;9. 22;10. S;11. AGT	1. 0.5926;2. 40;3. 118;4. 66;5. 66;6. 196;7. 117;8. 349;9. 94;10. C;11. TGT	1. 0.55835;2. 90;3. 268;4. 116;5. 116;6. 346;7. 167;8. 499;9. 244;10. T;11. ACG
ERS451417_00194	1717.62.peg.191	NA	NA	NA	1	19	Catypicum_R2070,"Cbelfantii_FRC0043","Ccamporealensis_DSM44610","Cdiphtheriae_NCTC11397","Cfalsenii_DSM44353","Ckroppenstedtii_DSM44385","Ckutscheri_DSM20755","Clactis_RW25","Cpseudotuberculosis_31","Cpseudotuberculosis_ATCC19410","CriegeliiPUDD83A45","Crouxii_FRC0190","Csilvaticum_KL0182","Csimulans_PES1","Ctestudinoris_DSM44614","Culcerans_NCTC12077","Culcerans_NCTC7910","Cuterequi_DSM45634","C…	0.178517	0.178517	1.98011	0.178517	0.178517	1.98012	2	1	1. 0.5804;2. 96;3. 286;4. 108;5. 108;6. 322;7. 137;8. 409;9. 247;10. T;11. ACC
ERS451417_01507	1717.62.peg.1515	NA	NA	NA	1	38	Cargentoratense_DSM44202,"Catypicum_R2070","Caurimucosum_ATCC700975","Cbelfantii_FRC0043","Ccallunae_DSM20147","Ccamporealensis_DSM44610","Cdeserti_GIMN1010","Cdiphtheriae_NCTC11397","Cdoosanense_DSM45436","Cefficiens_YS314","Cepidermidicanis_DSM45586","Cfalsenii_DSM44353","Cglutamicum_ATCC13032","Cglycinophilum_AJ3170","Chalotolerans_YIM70093","Chumireducens_DSM45392","Cimitans_DSM44264","Cjeike…	0.145778	0.145778	1.71932	0.145778	0.145778	1.71931	2306	0
ERS451417_01472	1717.62.peg.1482	NA	NA	NA	1	31	Catypicum_R2070,"Caurimucosum_ATCC700975","Cbelfantii_FRC0043","Ccallunae_DSM20147","Ccamporealensis_DSM44610","Cdeserti_GIMN1010","Cdiphtheriae_NCTC11397","Cdoosanense_DSM45436","Cefficiens_YS314","Cepidermidicanis_DSM45586","Cglutamicum_ATCC13032","Chalotolerans_YIM70093","Chumireducens_DSM45392","Cimitans_DSM44264","Ckutscheri_DSM20755","Clactis_RW25","Cmarinum_DSM44953","Cmaris_DSM45190","Cmu…	0.406256	0.298723	1.60178	0.406256	0.298723	1.60178	3074	1	1. 0.82986;2. 161;3. 481;4. 199;5. 171;6. 511;7. 205;8. 613;9. 355;10. L;11. TTA
ERS451417_00538	1717.62.peg.542	NA	NA	NA	1	4	Cbelfantii_FRC0043,"Cdiphtheriae_NCTC11397","Cepidermidicanis_DSM45586","Crouxii_FRC0190"	0.1596	0.1596	2.38041	0.1596	0.1596	2.38041	2	7	1. 0.4532;2. 41;3. 121;4. 79;5. 41;6. 121;7. 41;8. 121;9. 121;10. D;11. GAC	1. 0.43606;2. 145;3. 433;4. 186;5. 145;6. 433;7. 145;8. 433;9. 433;10. K;11. AAG	1. 0.42515;2. 352;3. 1054;4. 562;5. 352;6. 1054;7. 367;8. 1099;9. 919;10. D;11. GAC	1. 0.43085;2. 356;3. 1066;4. 567;5. 357;6. 1069;7. 372;8. 1114;9. 931;10. Q;11. CAG	1. 0.46429;2. 361;3. 1081;4. 602;5. 362;6. 1084;7. 377;8. 1129;9. 946;10. L;11. TTA	1. 0.60978;2. 445;3. 1333;4. 760;5. 456;6. 1366;7. 483;8. 1447;9. 1129;10. V;11. GTG	1. 0.42386;2. 465;3. 1393;4. 804;5. 477;6. 1429;7. 503;8. 1507;9. 1189;10. I;11. ATC
ERS451417_00404	1717.62.peg.404	NA	NA	NA	1	39	Cargentoratense_DSM44202,"Catypicum_R2070","Caurimucosum_ATCC700975","Cbelfantii_FRC0043","Ccallunae_DSM20147","Ccamporealensis_DSM44610","Cdeserti_GIMN1010","Cdiphtheriae_NCTC11397","Cdoosanense_DSM45436","Cefficiens_YS314","Cepidermidicanis_DSM45586","Cfalsenii_DSM44353","Cglutamicum_ATCC13032","Cglycinophilum_AJ3170","Chalotolerans_YIM70093","Chumireducens_DSM45392","Cimitans_DSM44264","Cjeike…	0.254509	0.254509	2.34406	0.254509	0.254509	2.34406	258	0
ERS451417_01303	1717.62.peg.1311	NA	NA	NA	1	38	Cargentoratense_DSM44202,"Catypicum_R2070","Caurimucosum_ATCC700975","Cbelfantii_FRC0043","Ccallunae_DSM20147","Ccamporealensis_DSM44610","Cdeserti_GIMN1010","Cdiphtheriae_NCTC11397","Cdoosanense_DSM45436","Cefficiens_YS314","Cepidermidicanis_DSM45586","Cfalsenii_DSM44353","Cglutamicum_ATCC13032","Cglycinophilum_AJ3170","Chalotolerans_YIM70093","Chumireducens_DSM45392","Cimitans_DSM44264","Cjeike…	0.228724	0.228724	1.46957	0.228724	0.228724	1.46957	2	3	1. 0.58257;2. 132;3. 394;4. 159;5. 159;6. 475;7. 177;8. 529;9. 370;10. N;11. AAT	1. 0.49756;2. 191;3. 571;4. 218;5. 218;6. 652;7. 236;8. 706;9. 547;10. N;11. AAC	1. 0.52321;2. 350;3. 1048;4. 402;5. 402;6. 1204;7. 450;8. 1348;9. 898;10. D;11. GAC
ERS451417_00329	1717.62.peg.331	NA	NA	NA	1	7	Cbelfantii_FRC0043,"Ccamporealensis_DSM44610","Cdiphtheriae_NCTC11397","Clactis_RW25","Cmarinum_DSM44953","Crouxii_FRC0190","Csimulans_PES1"	0.135418	0.135418	1.82405	0.141038	0.133548	1.82552	3074	3	1. 0.44433;2. 126;3. 376;4. 169;5. 150;6. 448;7. 156;8. 466;9. 310;10. I;11. ATC	1. 0.57903;2. 136;3. 406;4. 179;5. 160;6. 478;7. 166;8. 496;9. 340;10. A;11. GCA	1. 0.40054;2. 334;3. 1000;4. 419;5. 387;6. 1159;7. 433;8. 1297;9. 748;10. I;11. ATC
ERS451417_00447	1717.62.peg.450	NA	NA	NA	1	17	Cbelfantii_FRC0043,"Ccallunae_DSM20147","Ccamporealensis_DSM44610","Cdeserti_GIMN1010","Cdiphtheriae_NCTC11397","Cepidermidicanis_DSM45586","Cglutamicum_ATCC13032","Ckutscheri_DSM20755","Cmustelae_DSM45274","Cpseudotuberculosis_31","Cpseudotuberculosis_ATCC19410","Crouxii_FRC0190","Csilvaticum_KL0182","Ctestudinoris_DSM44614","Culcerans_NCTC12077","Culcerans_NCTC7910","Cuterequi_DSM45634"	0.104135	0.104135	2.18488	0.104135	0.104135	2.18488	258	0
ERS451417_00516	1717.62.peg.520	NA	NA	NA	1	10	Cbelfantii_FRC0043,"Cdiphtheriae_NCTC11397","Cjeikeium_K41","Clactis_RW25","Cpseudotuberculosis_31","Cpseudotuberculosis_ATCC19410","Crouxii_FRC0190","Csilvaticum_KL0182","Culcerans_NCTC12077","Culcerans_NCTC7910"	0.0432524	0.0432524	2.39988	0.0432524	0.0432524	2.39988	2306	0
ERS451417_00923	1717.62.peg.930	NA	NA	NA	1	5	Cbelfantii_FRC0043,"Cdiphtheriae_NCTC11397","Crouxii_FRC0190","Culcerans_NCTC12077","Culcerans_NCTC7910"	0.194523	0.194523	2.27202	0.194523	0.194523	2.27202	258	0
ERS451417_00944	1717.62.peg.951	NA	NA	NA	1	39	Cargentoratense_DSM44202,"Catypicum_R2070","Caurimucosum_ATCC700975","Cbelfantii_FRC0043","Ccallunae_DSM20147","Ccamporealensis_DSM44610","Cdeserti_GIMN1010","Cdiphtheriae_NCTC11397","Cdoosanense_DSM45436","Cefficiens_YS314","Cepidermidicanis_DSM45586","Cfalsenii_DSM44353","Cglutamicum_ATCC13032","Cglycinophilum_AJ3170","Chalotolerans_YIM70093","Chumireducens_DSM45392","Cimitans_DSM44264","Cjeike…	0.163295	0.163295	1.64798	0.163295	0.163295	1.64798	258	0
ERS451417_00553	1717.62.peg.557	NA	NA	NA	1	7	Cbelfantii_FRC0043,"Cdiphtheriae_NCTC11397","Cpseudotuberculosis_ATCC19410","Crouxii_FRC0190","Csilvaticum_KL0182","Culcerans_NCTC12077","Culcerans_NCTC7910"	0.153418	0.107592	3.08552	0.153418	0.107592	3.08552	2050	3	1. 0.6826;2. 126;3. 376;4. 130;5. 126;6. 376;7. 126;8. 376;9. 214;10. K;11. AAG	1. 0.57867;2. 166;3. 496;4. 174;5. 166;6. 496;7. 166;8. 496;9. 334;10. N;11. AAC	1. 0.68467;2. 268;3. 802;4. 296;5. 268;6. 802;7. 268;8. 802;9. 640;10. R;11. AGA
ERS451417_00563	1717.62.peg.566	NA	NA	NA	1	39	Cargentoratense_DSM44202,"Catypicum_R2070","Caurimucosum_ATCC700975","Cbelfantii_FRC0043","Ccallunae_DSM20147","Ccamporealensis_DSM44610","Cdeserti_GIMN1010","Cdiphtheriae_NCTC11397","Cdoosanense_DSM45436","Cefficiens_YS314","Cepidermidicanis_DSM45586","Cfalsenii_DSM44353","Cglutamicum_ATCC13032","Cglycinophilum_AJ3170","Chalotolerans_YIM70093","Chumireducens_DSM45392","Cimitans_DSM44264","Cjeike…	0.220698	0.152651	1.67292	0.220698	0.152651	1.67292	2	5	1. 0.66857;2. 88;3. 262;4. 88;5. 88;6. 262;7. 89;8. 265;9. 226;10. L;11. CTG	1. 0.58091;2. 437;3. 1309;4. 444;5. 444;6. 1330;7. 452;8. 1354;9. 1138;10. A;11. GCA	1. 0.67526;2. 504;3. 1510;4. 511;5. 511;6. 1531;7. 519;8. 1555;9. 1339;10. N;11. AAT	1. 0.63742;2. 638;3. 1912;4. 652;5. 652;6. 1954;7. 660;8. 1978;9. 1702;10. S;11. AGC	1. 0.66184;2. 675;3. 2023;4. 689;5. 689;6. 2065;7. 697;8. 2089;9. 1813;10. T;11. ACG
ERS451417_00027	1717.62.peg.24	NA	NA	NA	1	32	Cargentoratense_DSM44202,"Catypicum_R2070","Caurimucosum_ATCC700975","Cbelfantii_FRC0043","Ccallunae_DSM20147","Cdeserti_GIMN1010","Cdiphtheriae_NCTC11397","Cdoosanense_DSM45436","Cefficiens_YS314","Cfalsenii_DSM44353","Cglutamicum_ATCC13032","Cglycinophilum_AJ3170","Chalotolerans_YIM70093","Cjeikeium_K41","Ckroppenstedtii_DSM44385","Ckutscheri_DSM20755","Cmustelae_DSM45274","Cpseudotuberculosis_…	0.205182	0.205182	1.94021	0.205182	0.205182	1.94021	258	0
ERS451417_00412	1717.62.peg.412	NA	NA	NA	1	13	Catypicum_R2070,"Cbelfantii_FRC0043","Ccamporealensis_DSM44610","Cdiphtheriae_NCTC11397","Cepidermidicanis_DSM45586","Ckutscheri_DSM20755","Cpseudotuberculosis_31","Cpseudotuberculosis_ATCC19410","Crouxii_FRC0190","Csilvaticum_KL0182","Csimulans_PES1","Culcerans_NCTC12077","Culcerans_NCTC7910"	0.180711	0.180711	2.50643	0.18072	0.18072	2.50644	2306	0
ERS451417_01517	1717.62.peg.1525	NA	NA	NA	1	38	Cargentoratense_DSM44202,"Catypicum_R2070","Caurimucosum_ATCC700975","Cbelfantii_FRC0043","Ccallunae_DSM20147","Ccamporealensis_DSM44610","Cdeserti_GIMN1010","Cdiphtheriae_NCTC11397","Cdoosanense_DSM45436","Cefficiens_YS314","Cepidermidicanis_DSM45586","Cfalsenii_DSM44353","Cglutamicum_ATCC13032","Cglycinophilum_AJ3170","Chalotolerans_YIM70093","Chumireducens_DSM45392","Cimitans_DSM44264","Cjeike…	0.224165	0.224165	1.70277	0.224165	0.224165	1.70277	2	1	1. 0.63796;2. 495;3. 1483;4. 523;5. 523;6. 1567;7. 566;8. 1696;9. 1417;10. R;11. CGG
ERS451417_00829	1717.62.peg.833	NA	NA	NA	1	39	Cargentoratense_DSM44202,"Catypicum_R2070","Caurimucosum_ATCC700975","Cbelfantii_FRC0043","Ccallunae_DSM20147","Ccamporealensis_DSM44610","Cdeserti_GIMN1010","Cdiphtheriae_NCTC11397","Cdoosanense_DSM45436","Cefficiens_YS314","Cepidermidicanis_DSM45586","Cfalsenii_DSM44353","Cglutamicum_ATCC13032","Cglycinophilum_AJ3170","Chalotolerans_YIM70093","Chumireducens_DSM45392","Cimitans_DSM44264","Cjeike…	0.0871977	0.0871977	1.58476	0.0871977	0.0871977	1.58477	258	0
ERS451417_02283	1717.62.peg.2312	NA	NA	NA	1	38	Cargentoratense_DSM44202,"Catypicum_R2070","Caurimucosum_ATCC700975","Cbelfantii_FRC0043","Ccallunae_DSM20147","Ccamporealensis_DSM44610","Cdeserti_GIMN1010","Cdiphtheriae_NCTC11397","Cdoosanense_DSM45436","Cefficiens_YS314","Cepidermidicanis_DSM45586","Cfalsenii_DSM44353","Cglutamicum_ATCC13032","Cglycinophilum_AJ3170","Chalotolerans_YIM70093","Chumireducens_DSM45392","Cimitans_DSM44264","Cjeike…	0.538233	0.159738	1.35009	0.538253	0.159738	1.35009	2	2	1. 0.81685;2. 41;3. 121;4. 86;5. 86;6. 256;7. 117;8. 349;9. 115;10. T;11. ACT	1. 0.87888;2. 101;3. 301;4. 147;5. 147;6. 439;7. 178;8. 532;9. 283;10. K;11. AAG
ERS451417_02173	1717.62.peg.2199	NA	NA	NA	1	38	Cargentoratense_DSM44202,"Catypicum_R2070","Caurimucosum_ATCC700975","Cbelfantii_FRC0043","Ccallunae_DSM20147","Ccamporealensis_DSM44610","Cdeserti_GIMN1010","Cdiphtheriae_NCTC11397","Cdoosanense_DSM45436","Cefficiens_YS314","Cepidermidicanis_DSM45586","Cfalsenii_DSM44353","Cglutamicum_ATCC13032","Cglycinophilum_AJ3170","Chalotolerans_YIM70093","Chumireducens_DSM45392","Cimitans_DSM44264","Cjeike…	0.0672701	0.0672701	1.84568	0.0672701	0.0672701	1.84568	1026	1	1. 0.52691;2. 81;3. 241;4. 160;5. 160;6. 478;7. 319;8. 955;9. 175;10. S;11. TCT
ERS451417_00859	1717.62.peg.864	NA	NA	NA	1	20	Cbelfantii_FRC0043,"Ccallunae_DSM20147","Cdeserti_GIMN1010","Cdiphtheriae_NCTC11397","Cdoosanense_DSM45436","Cefficiens_YS314","Cepidermidicanis_DSM45586","Chalotolerans_YIM70093","Chumireducens_DSM45392","Cimitans_DSM44264","Cmarinum_DSM44953","Cmaris_DSM45190","Cpseudotuberculosis_31","Cpseudotuberculosis_ATCC19410","Crouxii_FRC0190","Csilvaticum_KL0182","Ctestudinoris_DSM44614","Culcerans_NCTC…	0.344722	0.344722	1.49623	0.344712	0.344712	1.49623	258	0
ERS451417_01581	1717.62.peg.1590	NA	NA	NA	1	29	Catypicum_R2070,"Caurimucosum_ATCC700975","Cbelfantii_FRC0043","Ccallunae_DSM20147","Ccamporealensis_DSM44610","Cdeserti_GIMN1010","Cdiphtheriae_NCTC11397","Cdoosanense_DSM45436","Cefficiens_YS314","Cepidermidicanis_DSM45586","Cglutamicum_ATCC13032","Chalotolerans_YIM70093","Chumireducens_DSM45392","Ckutscheri_DSM20755","Cmarinum_DSM44953","Cmaris_DSM45190","Cmustelae_DSM45274","Cpseudotuberculos…	0.223501	0.223501	1.63239	0.223501	0.223501	1.63239	3330	0
ERS451417_00313	1717.62.peg.314	NA	NA	NA	1	38	Catypicum_R2070,"Caurimucosum_ATCC700975","Cbelfantii_FRC0043","Ccallunae_DSM20147","Ccamporealensis_DSM44610","Cdeserti_GIMN1010","Cdiphtheriae_NCTC11397","Cdoosanense_DSM45436","Cefficiens_YS314","Cepidermidicanis_DSM45586","Cfalsenii_DSM44353","Cglutamicum_ATCC13032","Cglycinophilum_AJ3170","Chalotolerans_YIM70093","Chumireducens_DSM45392","Cimitans_DSM44264","Cjeikeium_K41","Ckroppenstedtii_D…	0.152363	0.126778	2.10125	0.152363	0.126778	2.10125	2	1	1. 0.6559;2. 173;3. 517;4. 199;5. 199;6. 595;7. 253;8. 757;9. 445;10. A;11. GCC
ERS451417_01684	1717.62.peg.1691	NA	NA	NA	1	9	Cbelfantii_FRC0043,"Cdiphtheriae_NCTC11397","Ckutscheri_DSM20755","Cpseudotuberculosis_31","Cpseudotuberculosis_ATCC19410","Csilvaticum_KL0182","Culcerans_NCTC12077","Culcerans_NCTC7910","Cvitaeruminis_DSM20294"	0.21604	0.21604	2.8195	0.21604	0.21604	2.8195	2	2	1. 0.52653;2. 297;3. 889;4. 368;5. 319;6. 955;7. 349;8. 1045;9. 712;10. N;11. AAC	1. 0.44182;2. 304;3. 910;4. 375;5. 326;6. 976;7. 356;8. 1066;9. 733;10. N;11. AAC
ERS451417_00954	1717.62.peg.961	NA	NA	NA	1	39	Cargentoratense_DSM44202,"Catypicum_R2070","Caurimucosum_ATCC700975","Cbelfantii_FRC0043","Ccallunae_DSM20147","Ccamporealensis_DSM44610","Cdeserti_GIMN1010","Cdiphtheriae_NCTC11397","Cdoosanense_DSM45436","Cefficiens_YS314","Cepidermidicanis_DSM45586","Cfalsenii_DSM44353","Cglutamicum_ATCC13032","Cglycinophilum_AJ3170","Chalotolerans_YIM70093","Chumireducens_DSM45392","Cimitans_DSM44264","Cjeike…	0.0837682	0.0837682	1.75908	0.0837682	0.0837682	1.75909	1026	1	1. 0.59574;2. 219;3. 655;4. 258;5. 258;6. 772;7. 273;8. 817;9. 607;10. S;11. TCC
ERS451417_00332	1717.62.peg.334	NA	NA	NA	1	39	Cargentoratense_DSM44202,"Catypicum_R2070","Caurimucosum_ATCC700975","Cbelfantii_FRC0043","Ccallunae_DSM20147","Ccamporealensis_DSM44610","Cdeserti_GIMN1010","Cdiphtheriae_NCTC11397","Cdoosanense_DSM45436","Cefficiens_YS314","Cepidermidicanis_DSM45586","Cfalsenii_DSM44353","Cglutamicum_ATCC13032","Cglycinophilum_AJ3170","Chalotolerans_YIM70093","Chumireducens_DSM45392","Cimitans_DSM44264","Cjeike…	0.186547	0.186547	1.77437	0.186547	0.186547	1.77437	1026	1	1. 0.52044;2. 223;3. 667;4. 418;5. 418;6. 1252;7. 498;8. 1492;9. 592;10. V;11. GTC
ERS451417_00100	1717.62.peg.98	NA	NA	NA	1	3	Cbelfantii_FRC0043,"Cdiphtheriae_NCTC11397","Crouxii_FRC0190"	0.222182	0.222182	4.98564	0.222182	0.222182	4.98565	130	1	1. 0.6997;2. 145;3. 433;4. 193;5. 171;6. 511;7. 171;8. 511;9. 421;10. I;11. ATA
ERS451417_01160	1717.62.peg.1171	NA	NA	NA	1	37	Cargentoratense_DSM44202,"Caurimucosum_ATCC700975","Cbelfantii_FRC0043","Ccallunae_DSM20147","Ccamporealensis_DSM44610","Cdeserti_GIMN1010","Cdiphtheriae_NCTC11397","Cdoosanense_DSM45436","Cefficiens_YS314","Cepidermidicanis_DSM45586","Cfalsenii_DSM44353","Cglutamicum_ATCC13032","Cglycinophilum_AJ3170","Chalotolerans_YIM70093","Chumireducens_DSM45392","Cimitans_DSM44264","Cjeikeium_K41","Ckroppen…	0.242932	0.186296	1.64783	0.242932	0.186296	1.64783	3074	2	1. 0.70793;2. 39;3. 115;4. 66;5. 66;6. 196;7. 87;8. 259;9. 82;10. V;11. GTT	1. 0.70552;2. 199;3. 595;4. 234;5. 234;6. 700;7. 280;8. 838;9. 460;10. T;11. ACA
ERS451417_00458	1717.62.peg.462	NA	NA	NA	1	39	Cargentoratense_DSM44202,"Catypicum_R2070","Caurimucosum_ATCC700975","Cbelfantii_FRC0043","Ccallunae_DSM20147","Ccamporealensis_DSM44610","Cdeserti_GIMN1010","Cdiphtheriae_NCTC11397","Cdoosanense_DSM45436","Cefficiens_YS314","Cepidermidicanis_DSM45586","Cfalsenii_DSM44353","Cglutamicum_ATCC13032","Cglycinophilum_AJ3170","Chalotolerans_YIM70093","Chumireducens_DSM45392","Cimitans_DSM44264","Cjeike…	0.199423	0.199423	1.8696	0.199433	0.199433	1.86962	258	0
ERS451417_00850	1717.62.peg.855	NA	NA	NA	1	17	Cargentoratense_DSM44202,"Cbelfantii_FRC0043","Ccallunae_DSM20147","Cdeserti_GIMN1010","Cdiphtheriae_NCTC11397","Cefficiens_YS314","Cfalsenii_DSM44353","Cglycinophilum_AJ3170","Chumireducens_DSM45392","Ckroppenstedtii_DSM44385","Ckutscheri_DSM20755","Clactis_RW25","Cmarinum_DSM44953","Crouxii_FRC0190","Cterpenotabidum_Y11","Ctestudinoris_DSM44614","Curealyticum_DSM7109"	0.411516	0.411516	1.47975	0.411516	0.411516	1.47975	258	0
ERS451417_00448	1717.62.peg.451	NA	NA	NA	1	17	Cbelfantii_FRC0043,"Ccallunae_DSM20147","Ccamporealensis_DSM44610","Cdeserti_GIMN1010","Cdiphtheriae_NCTC11397","Cepidermidicanis_DSM45586","Cglutamicum_ATCC13032","Ckutscheri_DSM20755","Cmustelae_DSM45274","Cpseudotuberculosis_31","Cpseudotuberculosis_ATCC19410","Crouxii_FRC0190","Csilvaticum_KL0182","Ctestudinoris_DSM44614","Culcerans_NCTC12077","Culcerans_NCTC7910","Cuterequi_DSM45634"	0.123487	0.123487	2.19057	0.123487	0.123487	2.19058	2	2	1. 0.65945;2. 326;3. 976;4. 358;5. 358;6. 1072;7. 417;8. 1249;9. 799;10. H;11. CAT	1. 0.64437;2. 373;3. 1117;4. 408;5. 408;6. 1222;7. 469;8. 1405;9. 907;10. S;11. TCG
ERS451417_01531	1717.62.peg.1540	NA	NA	NA	1	38	Cargentoratense_DSM44202,"Catypicum_R2070","Caurimucosum_ATCC700975","Cbelfantii_FRC0043","Ccallunae_DSM20147","Ccamporealensis_DSM44610","Cdeserti_GIMN1010","Cdiphtheriae_NCTC11397","Cdoosanense_DSM45436","Cefficiens_YS314","Cepidermidicanis_DSM45586","Cfalsenii_DSM44353","Cglutamicum_ATCC13032","Cglycinophilum_AJ3170","Chalotolerans_YIM70093","Chumireducens_DSM45392","Cimitans_DSM44264","Cjeike…	0.395371	0.119438	1.88177	0.395361	0.119438	1.88177	2	2	1. 0.67377;2. 188;3. 562;4. 200;5. 200;6. 598;7. 255;8. 763;9. 496;10. Q;11. CAG	1. 0.82421;2. 235;3. 703;4. 247;5. 247;6. 739;7. 302;8. 904;9. 637;10. D;11. GAC
ERS451417_02199	1717.62.peg.2225	NA	NA	NA	1	7	Catypicum_R2070,"Cbelfantii_FRC0043","Cdiphtheriae_NCTC11397","Cdoosanense_DSM45436","Clactis_RW25","Cmarinum_DSM44953","Cmaris_DSM45190"	0.279532	0.279532	1.69908	0.279532	0.279532	1.69908	2050	2	1. 0.48704;2. 267;3. 799;4. 318;5. 286;6. 856;7. 309;8. 925;9. 667;10. T;11. ACC	1. 0.50893;2. 299;3. 895;4. 351;5. 318;6. 952;7. 341;8. 1021;9. 763;10. M;11. ATG
ERS451417_01513	1717.62.peg.1521	NA	NA	NA	1	14	Cargentoratense_DSM44202,"Cbelfantii_FRC0043","Cdiphtheriae_NCTC11397","Cepidermidicanis_DSM45586","Ckroppenstedtii_DSM44385","Ckutscheri_DSM20755","Clactis_RW25","Cmustelae_DSM45274","Cpseudotuberculosis_31","Cpseudotuberculosis_ATCC19410","Csilvaticum_KL0182","Culcerans_NCTC12077","Culcerans_NCTC7910","Cvitaeruminis_DSM20294"	1	0.149735	2.20821	1	0.149735	2.20821	3072	5	1. 0.94585;2. 32;3. 94;4. 41;5. 41;6. 121;7. 54;8. 160;9. 70;10. K;11. AAG	1. 0.87117;2. 227;3. 679;4. 252;5. 252;6. 754;7. 272;8. 814;9. 571;10. N;11. AAT	1. 0.56645;2. 297;3. 889;4. 331;5. 331;6. 991;7. 375;8. 1123;9. 691;10. Q;11. CAA	1. 0.92339;2. 355;3. 1063;4. 395;5. 395;6. 1183;7. 439;8. 1315;9. 856;10. R;11. CGT	1. 0.50188;2. 364;3. 1090;4. 404;5. 404;6. 1210;7. 448;8. 1342;9. 883;10. H;11. CAT
ERS451417_01209	1717.62.peg.1217	NA	NA	NA	1	32	Cargentoratense_DSM44202,"Catypicum_R2070","Cbelfantii_FRC0043","Ccallunae_DSM20147","Cdeserti_GIMN1010","Cdiphtheriae_NCTC11397","Cefficiens_YS314","Cepidermidicanis_DSM45586","Cfalsenii_DSM44353","Cglutamicum_ATCC13032","Cglycinophilum_AJ3170","Chalotolerans_YIM70093","Chumireducens_DSM45392","Cimitans_DSM44264","Cjeikeium_K41","Ckroppenstedtii_DSM44385","Ckutscheri_DSM20755","Clactis_RW25","Cm…	0.24989	0.212425	1.50145	0.24989	0.212425	1.50145	3074	2	1. 0.70095;2. 106;3. 316;4. 109;5. 109;6. 325;7. 111;8. 331;9. 283;10. I;11. ATC	1. 0.72611;2. 177;3. 529;4. 180;5. 180;6. 538;7. 182;8. 544;9. 496;10. E;11. GAA
ERS451417_00604	1717.62.peg.608	NA	NA	NA	1	6	Cbelfantii_FRC0043,"Cdiphtheriae_NCTC11397","Cepidermidicanis_DSM45586","Clactis_RW25","Cmustelae_DSM45274","Cvitaeruminis_DSM20294"	0.190938	0.190938	1.68976	0.190938	0.190938	1.68976	2	1	1. 0.41188;2. 231;3. 691;4. 275;5. 275;6. 823;7. 286;8. 856;9. 613;10. I;11. ATT
[truncated: 498 more rows]
[truncated: 72 more columns]
