# Supplementary material for: Evidence of episodic positive selection in Corynebacterium diphtheriae complex of species and its implementations in identification of drug and vaccine targets
Source: PeerJ. 2022 Feb 16;10:e12662. doi: 10.7717/peerj.12662 (PMC8857904; doi:10.7717/peerj.12662)
Supplement: Supplemental Information 8 [file peerj-10-12662-s008.xlsx]

## Sheet: Cpovis
Gene	Transcript	Bonferroni	FDR	P-Value	P-Value raw	Number of species included	Species included	HA foreground omega	HA background omega	HA kappa	H0 foreground omega	H0 background omega	H0 kappa	Correction code	Number of Sites under positive Selection	Site under positve Selection 1(1. Probability to be under positive selection;2. Position in amino acid sequence of anchor species;3. Position in nucleotide sequence of anchor species;4.Position in main protein alignment:fastp.clustalw.aln;5. Position in protein clustal subalignment: .aln;6. Position in to codon backtranslated clustal subalignment: Codon_aln.fasta; 7. Position in prank alignment (…	Site under positve Selection 2	Site under positve Selection 3	Site under positve Selection 4	Site under positve Selection 5	Site under positve Selection 6	Site under positve Selection 7	Site under positve Selection 8	Site under positve Selection 9	Site under positve Selection 10	Site under positve Selection 11	Site under positve Selection 12	Site under positve Selection 13	Site under positve Selection 14	Site under positve Selection 15	Site under positve Selection 16	Site under positve Selection 17	Site under positve Selection 18	Site under positve Selection 19	Site under positve Selection 20	Site under positve Selection 21	Site under positve Selection 22	Site under positve Selection 23	Site under positve Selection 24	Site under positve Selection 25	Site under positve Selection 26	Site under positve Selection 27	Site under positve Selection 28	Site under positve Selection 29	Site under positve Selection 30	Site under positve Selection 31	Site under positve Selection 32	Site under positve Selection 33	Site under positve Selection 34
ERS451417_02304	1717.62.peg.2331	0.96968	0.96968	0.03128	0.03128	5	Cbelfantii_FRC0043,"Cdiphtheriae_NCTC11397","Cpseudotuberculosis_31","Cpseudotuberculosis_ATCC19410","Csilvaticum_KL0182"	3.72865	0.464291	5.59448	0.777017	0.463698	5.55359	0	3	1. 0.8668;2. 12;3. 34;4. 53;5. 16;6. 46;7. 16;8. 46;9. 25;10. T;11. ACC	1. 0.53581;2. 182;3. 544;4. 268;5. 187;6. 559;7. 187;8. 559;9. 526;10. R;11. CGA	1. 0.96048;2. 268;3. 802;4. 366;5. 273;6. 817;7. 273;8. 817;9. 784;10. S;11. AGC
ERS451417_00712	1717.62.peg.717	1	1	0.1572	0.1572	39	Cargentoratense_DSM44202,"Catypicum_R2070","Caurimucosum_ATCC700975","Cbelfantii_FRC0043","Ccallunae_DSM20147","Ccamporealensis_DSM44610","Cdeserti_GIMN1010","Cdiphtheriae_NCTC11397","Cdoosanense_DSM45436","Cefficiens_YS314","Cepidermidicanis_DSM45586","Cfalsenii_DSM44353","Cglutamicum_ATCC13032","Cglycinophilum_AJ3170","Chalotolerans_YIM70093","Chumireducens_DSM45392","Cimitans_DSM44264","Cjeike…	118.1	0.159098	1.49332	1	0.159089	1.49295	0	3	1. 0.99181;2. 88;3. 262;4. 124;5. 124;6. 370;7. 173;8. 517;9. 202;10. T;11. ACC	1. 0.99462;2. 311;3. 931;4. 354;5. 354;6. 1060;7. 422;8. 1264;9. 787;10. I;11. ATT	1. 0.99238;2. 347;3. 1039;4. 390;5. 390;6. 1168;7. 458;8. 1372;9. 895;10. I;11. ATC
ERS451417_01334	1717.62.peg.1342	1	1	0.3081	0.3081	38	Cargentoratense_DSM44202,"Catypicum_R2070","Caurimucosum_ATCC700975","Cbelfantii_FRC0043","Ccallunae_DSM20147","Ccamporealensis_DSM44610","Cdeserti_GIMN1010","Cdiphtheriae_NCTC11397","Cdoosanense_DSM45436","Cefficiens_YS314","Cepidermidicanis_DSM45586","Cfalsenii_DSM44353","Cglutamicum_ATCC13032","Cglycinophilum_AJ3170","Chalotolerans_YIM70093","Chumireducens_DSM45392","Cimitans_DSM44264","Cjeike…	0.996088	0.149455	1.57736	0.387111	0.149464	1.57769	0	2	1. 0.87188;2. 31;3. 91;4. 31;5. 31;6. 91;7. 31;8. 91;9. 88;10. G;11. GGG	1. 0.87057;2. 243;3. 727;4. 270;5. 270;6. 808;7. 295;8. 883;9. 655;10. A;11. GCC
ERS451417_01194	1717.62.peg.1203	1	1	0.3644	0.3644	30	Caurimucosum_ATCC700975,"Cbelfantii_FRC0043","Ccallunae_DSM20147","Ccamporealensis_DSM44610","Cdeserti_GIMN1010","Cdiphtheriae_NCTC11397","Cdoosanense_DSM45436","Cefficiens_YS314","Cepidermidicanis_DSM45586","Cglutamicum_ATCC13032","Chalotolerans_YIM70093","Chumireducens_DSM45392","Cimitans_DSM44264","Ckutscheri_DSM20755","Cmarinum_DSM44953","Cmaris_DSM45190","Cmustelae_DSM45274","Cpseudotubercul…	83.1678	0.179038	1.67734	1	0.179038	1.67702	0	1	1. 0.95152;2. 101;3. 301;4. 109;5. 109;6. 325;7. 118;8. 352;9. 256;10. E;11. GAA
ERS451417_01284	1717.62.peg.1292	1	1	0.3969	0.3969	34	Cargentoratense_DSM44202,"Catypicum_R2070","Caurimucosum_ATCC700975","Cbelfantii_FRC0043","Ccallunae_DSM20147","Ccamporealensis_DSM44610","Cdeserti_GIMN1010","Cdiphtheriae_NCTC11397","Cdoosanense_DSM45436","Cefficiens_YS314","Cepidermidicanis_DSM45586","Cglutamicum_ATCC13032","Chalotolerans_YIM70093","Chumireducens_DSM45392","Cjeikeium_K41","Ckroppenstedtii_DSM44385","Ckutscheri_DSM20755","Clacti…	112.445	0.120092	1.97801	1	0.120092	1.97558	0	1	1. 0.98216;2. 154;3. 460;4. 162;5. 154;6. 460;7. 154;8. 460;9. 427;10. E;11. GAA
ERS451417_00985	1717.62.peg.996	1	1	0.432	0.432	38	Cargentoratense_DSM44202,"Catypicum_R2070","Caurimucosum_ATCC700975","Cbelfantii_FRC0043","Ccallunae_DSM20147","Ccamporealensis_DSM44610","Cdeserti_GIMN1010","Cdiphtheriae_NCTC11397","Cdoosanense_DSM45436","Cefficiens_YS314","Cepidermidicanis_DSM45586","Cfalsenii_DSM44353","Cglutamicum_ATCC13032","Cglycinophilum_AJ3170","Chalotolerans_YIM70093","Chumireducens_DSM45392","Cimitans_DSM44264","Cjeike…	53.0024	0.197155	1.65913	1	0.197155	1.65887	0	1	1. 0.92698;2. 86;3. 256;4. 92;5. 92;6. 274;7. 144;8. 430;9. 208;10. K;11. AAA
ERS451417_01618	1717.62.peg.1626	1	1	0.4469	0.4469	9	Cbelfantii_FRC0043,"Cdiphtheriae_NCTC11397","Chalotolerans_YIM70093","Cmarinum_DSM44953","Cpseudotuberculosis_31","Cpseudotuberculosis_ATCC19410","Csilvaticum_KL0182","Culcerans_NCTC12077","Culcerans_NCTC7910"	134.548	0.17065	2.31541	1	0.170704	2.31077	0	2	1. 0.97552;2. 67;3. 199;4. 149;5. 70;6. 208;7. 70;8. 208;9. 139;10. A;11. GCT	1. 0.96376;2. 156;3. 466;4. 254;5. 160;6. 478;7. 159;8. 475;9. 370;10. I;11. ATT
ERS451417_00459	1717.62.peg.463	1	1	0.4797	0.4797	39	Cargentoratense_DSM44202,"Catypicum_R2070","Caurimucosum_ATCC700975","Cbelfantii_FRC0043","Ccallunae_DSM20147","Ccamporealensis_DSM44610","Cdeserti_GIMN1010","Cdiphtheriae_NCTC11397","Cdoosanense_DSM45436","Cefficiens_YS314","Cepidermidicanis_DSM45586","Cfalsenii_DSM44353","Cglutamicum_ATCC13032","Cglycinophilum_AJ3170","Chalotolerans_YIM70093","Chumireducens_DSM45392","Cimitans_DSM44264","Cjeike…	57.0548	0.185774	1.82789	1	0.185784	1.82744	0	1	1. 0.98073;2. 38;3. 112;4. 39;5. 39;6. 115;7. 40;8. 118;9. 85;10. R;11. CGT
ERS451417_00402	1717.62.peg.402	1	1	0.4973	0.4973	39	Cargentoratense_DSM44202,"Catypicum_R2070","Caurimucosum_ATCC700975","Cbelfantii_FRC0043","Ccallunae_DSM20147","Ccamporealensis_DSM44610","Cdeserti_GIMN1010","Cdiphtheriae_NCTC11397","Cdoosanense_DSM45436","Cefficiens_YS314","Cepidermidicanis_DSM45586","Cfalsenii_DSM44353","Cglutamicum_ATCC13032","Cglycinophilum_AJ3170","Chalotolerans_YIM70093","Chumireducens_DSM45392","Cimitans_DSM44264","Cjeike…	61.8997	0.110712	2.35641	1	0.110712	2.35653	0	1	1. 0.97733;2. 26;3. 76;4. 26;5. 26;6. 76;7. 26;8. 76;9. 73;10. K;11. AAG
ERS451417_00836	1717.62.peg.841	1	1	0.5067	0.5067	39	Cargentoratense_DSM44202,"Catypicum_R2070","Caurimucosum_ATCC700975","Cbelfantii_FRC0043","Ccallunae_DSM20147","Ccamporealensis_DSM44610","Cdeserti_GIMN1010","Cdiphtheriae_NCTC11397","Cdoosanense_DSM45436","Cefficiens_YS314","Cepidermidicanis_DSM45586","Cfalsenii_DSM44353","Cglutamicum_ATCC13032","Cglycinophilum_AJ3170","Chalotolerans_YIM70093","Chumireducens_DSM45392","Cimitans_DSM44264","Cjeike…	101.416	0.0926827	1.86993	0.99999	0.0926827	1.86985	0	1	1. 0.93133;2. 407;3. 1219;4. 435;5. 435;6. 1303;7. 475;8. 1423;9. 1126;10. R;11. CGC
ERS451417_01999	1717.62.peg.2003	1	1	0.5507	0.5507	7	Cbelfantii_FRC0043,"Cdiphtheriae_NCTC11397","Cpseudotuberculosis_31","Cpseudotuberculosis_ATCC19410","Csilvaticum_KL0182","Culcerans_NCTC12077","Culcerans_NCTC7910"	129.659	0.315366	4.3395	1	0.316272	4.33868	0	1	1. 0.42495;2. 331;3. 991;4. 331;5. 331;6. 991;7. 331;8. 991;9. 991;10. A;11. GCG
ERS451417_00006	1717.62.peg.7	1	1	0.6404	0.6404	16	Cbelfantii_FRC0043,"Ccamporealensis_DSM44610","Cdiphtheriae_NCTC11397","Chalotolerans_YIM70093","Chumireducens_DSM45392","Ckutscheri_DSM20755","Cmaris_DSM45190","Cpseudotuberculosis_31","Cpseudotuberculosis_ATCC19410","Crouxii_FRC0190","Csilvaticum_KL0182","Csimulans_PES1","Ctestudinoris_DSM44614","Culcerans_NCTC12077","Culcerans_NCTC7910","Cvitaeruminis_DSM20294"	78.1098	0.147932	1.92794	1	0.148061	1.92738	0	1	1. 0.97431;2. 38;3. 112;4. 89;5. 50;6. 148;7. 50;8. 148;9. 67;10. L;11. CTC
ERS451417_01671	1717.62.peg.1678	1	1	0.7058	0.7058	16	Cbelfantii_FRC0043,"Ccamporealensis_DSM44610","Cdiphtheriae_NCTC11397","Cfalsenii_DSM44353","Chumireducens_DSM45392","Cjeikeium_K41","Ckutscheri_DSM20755","Clactis_RW25","Cpseudotuberculosis_31","Cpseudotuberculosis_ATCC19410","Csilvaticum_KL0182","Csimulans_PES1","Ctestudinoris_DSM44614","Culcerans_NCTC12077","Culcerans_NCTC7910","Cvitaeruminis_DSM20294"	74.1346	0.153696	2.35998	1	0.153629	2.3604	0	1	1. 0.9643;2. 274;3. 820;4. 294;5. 294;6. 880;7. 314;8. 940;9. 685;10. A;11. GCT
ERS451417_00241	1717.62.peg.236	1	1	0.7322	0.7322	7	Cbelfantii_FRC0043,"Cdiphtheriae_NCTC11397","Cpseudotuberculosis_31","Cpseudotuberculosis_ATCC19410","Crouxii_FRC0190","Culcerans_NCTC12077","Culcerans_NCTC7910"	1.46642	0.268708	3.41155	1	0.26905	3.40822	0	4	1. 0.95003;2. 85;3. 253;4. 139;5. 85;6. 253;7. 85;8. 253;9. 232;10. E;11. GAA	1. 0.95757;2. 133;3. 397;4. 211;5. 133;6. 397;7. 133;8. 397;9. 373;10. A;11. GCG	1. 0.96158;2. 219;3. 655;4. 315;5. 220;6. 658;7. 220;8. 658;9. 631;10. L;11. TTG	1. 0.96517;2. 227;3. 679;4. 323;5. 228;6. 682;7. 228;8. 682;9. 655;10. R;11. CGC
ERS451417_01337	1717.62.peg.1345	1	1	0.8829	0.8829	6	Cdiphtheriae_NCTC11397,"Cpseudotuberculosis_31","Cpseudotuberculosis_ATCC19410","Csilvaticum_KL0182","Culcerans_NCTC12077","Culcerans_NCTC7910"	0.877624	0.446458	4.4028	0.99997	0.446679	4.41089	0	1	1. 0.88221;2. 66;3. 196;4. 118;5. 77;6. 229;7. 77;8. 229;9. 166;10. A;11. GCT
ERS451417_01451	1717.62.peg.1458	1	1	1	1	10	Cbelfantii_FRC0043,"Cdiphtheriae_NCTC11397","Ckutscheri_DSM20755","Cmustelae_DSM45274","Cpseudotuberculosis_31","Cpseudotuberculosis_ATCC19410","Csilvaticum_KL0182","Culcerans_NCTC12077","Culcerans_NCTC7910","Cvitaeruminis_DSM20294"	1	0.138886	2.46866	1	0.138886	2.46866	0	1	1. 0.94167;2. 12;3. 34;4. 12;5. 12;6. 34;7. 12;8. 34;9. 31;10. A;11. GCA
ERS451417_00777	1717.62.peg.784	1	1	1	1	39	Cargentoratense_DSM44202,"Catypicum_R2070","Caurimucosum_ATCC700975","Cbelfantii_FRC0043","Ccallunae_DSM20147","Ccamporealensis_DSM44610","Cdeserti_GIMN1010","Cdiphtheriae_NCTC11397","Cdoosanense_DSM45436","Cefficiens_YS314","Cepidermidicanis_DSM45586","Cfalsenii_DSM44353","Cglutamicum_ATCC13032","Cglycinophilum_AJ3170","Chalotolerans_YIM70093","Chumireducens_DSM45392","Cimitans_DSM44264","Cjeike…	0.999586	0.157154	1.9013	1	0.157155	1.9013	0	2	1. 0.95946;2. 194;3. 580;4. 226;5. 226;6. 676;7. 244;8. 730;9. 466;10. P;11. CCT	1. 0.9602;2. 544;3. 1630;4. 587;5. 587;6. 1759;7. 605;8. 1813;9. 1489;10. P;11. CCC
ERS451417_01996	1717.62.peg.2000	1	1	1	1	7	Cbelfantii_FRC0043,"Cdiphtheriae_NCTC11397","Cpseudotuberculosis_31","Cpseudotuberculosis_ATCC19410","Csilvaticum_KL0182","Culcerans_NCTC12077","Culcerans_NCTC7910"	1	0.320174	5.12729	1	0.320174	5.1273	0	6	1. 0.81393;2. 86;3. 256;4. 86;5. 86;6. 256;7. 86;8. 256;9. 154;10. A;11. GCC	1. 0.81807;2. 241;3. 721;4. 254;5. 254;6. 760;7. 255;8. 763;9. 601;10. V;11. GTT	1. 0.81743;2. 331;3. 991;4. 346;5. 346;6. 1036;7. 347;8. 1039;9. 865;10. V;11. GTG	1. 0.81582;2. 405;3. 1213;4. 420;5. 420;6. 1258;7. 421;8. 1261;9. 1087;10. R;11. CGT	1. 0.78007;2. 557;3. 1669;4. 572;5. 572;6. 1714;7. 573;8. 1717;9. 1543;10. A;11. GCT	1. 0.41408;2. 561;3. 1681;4. 576;5. 576;6. 1726;7. 577;8. 1729;9. 1555;10. T;11. ACC
ERS451417_01933	1717.62.peg.1930	1	1	1	1	8	Cbelfantii_FRC0043,"Cdiphtheriae_NCTC11397","Cpseudotuberculosis_31","Cpseudotuberculosis_ATCC19410","Csilvaticum_KL0182","Culcerans_NCTC12077","Culcerans_NCTC7910","Cvitaeruminis_DSM20294"	0.999892	0.0550233	2.20415	0.756175	0.0550915	2.2041	0	1	1. 0.86518;2. 105;3. 313;4. 131;5. 105;6. 313;7. 125;8. 373;9. 220;10. L;11. CTC
ERS451417_01903	1717.62.peg.1898	1	1	1	1	5	Cbelfantii_FRC0043,"Cdiphtheriae_NCTC11397","Cpseudotuberculosis_31","Cpseudotuberculosis_ATCC19410","Culcerans_NCTC7910"	1	0.222164	4.22091	1	0.222155	4.22093	0	2	1. 0.46183;2. 200;3. 598;4. 211;5. 200;6. 598;7. 204;8. 610;9. 535;10. I;11. ATC	1. 0.93165;2. 202;3. 604;4. 213;5. 202;6. 604;7. 206;8. 616;9. 541;10. K;11. AAG
ERS451417_00487	1717.62.peg.490	1	1	1	1	17	Cbelfantii_FRC0043,"Ccallunae_DSM20147","Cdeserti_GIMN1010","Cdiphtheriae_NCTC11397","Cglutamicum_ATCC13032","Chalotolerans_YIM70093","Chumireducens_DSM45392","Cmarinum_DSM44953","Cmaris_DSM45190","Cpseudotuberculosis_31","Cpseudotuberculosis_ATCC19410","Crouxii_FRC0190","Csilvaticum_KL0182","Ctestudinoris_DSM44614","Culcerans_NCTC12077","Culcerans_NCTC7910","Cvitaeruminis_DSM20294"	1	0.314796	2.45749	1	0.314796	2.45749	0	2	1. 0.94962;2. 19;3. 55;4. 40;5. 19;6. 55;7. 19;8. 55;9. 34;10. H;11. CAC	1. 0.94728;2. 100;3. 298;4. 122;5. 101;6. 301;7. 101;8. 301;9. 277;10. R;11. CGC
ERS451417_01633	1717.62.peg.1640	1	1	1	1	10	Cbelfantii_FRC0043,"Cdiphtheriae_NCTC11397","Cefficiens_YS314","Cmustelae_DSM45274","Cpseudotuberculosis_31","Cpseudotuberculosis_ATCC19410","Csilvaticum_KL0182","Culcerans_NCTC12077","Culcerans_NCTC7910","Cvitaeruminis_DSM20294"	1	0.365161	3.8256	1	0.365161	3.8256	0	1	1. 0.94121;2. 103;3. 307;4. 125;5. 113;6. 337;7. 113;8. 337;9. 280;10. S;11. TCT
ERS451417_00367	1717.62.peg.366	1	1	1	1	8	Cbelfantii_FRC0043,"Cdiphtheriae_NCTC11397","Cpseudotuberculosis_31","Cpseudotuberculosis_ATCC19410","Crouxii_FRC0190","Csilvaticum_KL0182","Culcerans_NCTC12077","Culcerans_NCTC7910"	1	0.0930164	2.29895	1	0.0930164	2.29895	0	1	1. 0.91657;2. 38;3. 112;4. 61;5. 47;6. 139;7. 56;8. 166;9. 49;10. A;11. GCA
ERS451417_01998	1717.62.peg.2002	1	1	1	1	7	Cbelfantii_FRC0043,"Cdiphtheriae_NCTC11397","Cpseudotuberculosis_31","Cpseudotuberculosis_ATCC19410","Csilvaticum_KL0182","Culcerans_NCTC12077","Culcerans_NCTC7910"	0.863468	0.304931	4.8517	0.863468	0.304931	4.8517	0	3	1. 0.61027;2. 15;3. 43;4. 15;5. 15;6. 43;7. 15;8. 43;9. 43;10. A;11. GCT	1. 0.76888;2. 125;3. 373;4. 125;5. 125;6. 373;7. 125;8. 373;9. 373;10. G;11. GGA	1. 0.62672;2. 205;3. 613;4. 206;5. 206;6. 616;7. 206;8. 616;9. 613;10. P;11. CCG
ERS451417_00943	1717.62.peg.950	1	1	1	1	14	Catypicum_R2070,"Cbelfantii_FRC0043","Cdiphtheriae_NCTC11397","Cepidermidicanis_DSM45586","Ckutscheri_DSM20755","Clactis_RW25","Cpseudotuberculosis_31","Cpseudotuberculosis_ATCC19410","Crouxii_FRC0190","Csilvaticum_KL0182","Culcerans_NCTC12077","Culcerans_NCTC7910","Cuterequi_DSM45634","Cvitaeruminis_DSM20294"	1	0.147134	1.96614	0.993245	0.147134	1.96613	0	2	1. 0.96242;2. 298;3. 892;4. 324;5. 324;6. 970;7. 363;8. 1087;9. 724;10. F;11. TTC	1. 0.96224;2. 425;3. 1273;4. 455;5. 455;6. 1363;7. 498;8. 1492;9. 1066;10. G;11. GGC
ERS451417_02175	1717.62.peg.2201	1	1	1	1	7	Cbelfantii_FRC0043,"Cdiphtheriae_NCTC11397","Cpseudotuberculosis_31","Cpseudotuberculosis_ATCC19410","Csilvaticum_KL0182","Culcerans_NCTC12077","Culcerans_NCTC7910"	1	0.0956776	2.78821	1	0.0956776	2.78821	0	5	1. 0.94014;2. 4;3. 10;4. 27;5. 11;6. 31;7. 11;8. 31;9. 10;10. R;11. CGT	1. 0.92682;2. 29;3. 85;4. 52;5. 36;6. 106;7. 36;8. 106;9. 85;10. Y;11. TAC	1. 0.94013;2. 43;3. 127;4. 66;5. 50;6. 148;7. 50;8. 148;9. 127;10. S;11. TCG	1. 0.9416;2. 225;3. 673;4. 276;5. 236;6. 706;7. 239;8. 715;9. 601;10. K;11. AAG	1. 0.93586;2. 864;3. 2590;4. 964;5. 893;6. 2677;7. 896;8. 2686;9. 2506;10. V;11. GTT
ERS451417_00520	1717.62.peg.524	1	1	1	1	7	Cbelfantii_FRC0043,"Cdiphtheriae_NCTC11397","Cpseudotuberculosis_31","Cpseudotuberculosis_ATCC19410","Csilvaticum_KL0182","Culcerans_NCTC12077","Culcerans_NCTC7910"	1	0.27079	2.94593	1	0.27079	2.94593	0	4	1. 0.92664;2. 266;3. 796;4. 284;5. 283;6. 847;7. 293;8. 877;9. 724;10. S;11. TCC	1. 0.89462;2. 361;3. 1081;4. 380;5. 379;6. 1135;7. 389;8. 1165;9. 1009;10. V;11. GTC	1. 0.88569;2. 551;3. 1651;4. 582;5. 581;6. 1741;7. 591;8. 1771;9. 1567;10. V;11. GTC	1. 0.41291;2. 714;3. 2140;4. 747;5. 746;6. 2236;7. 756;8. 2266;9. 2053;10. T;11. ACC
ERS451417_00159	1717.62.peg.157	1	1	1	1	5	Cdiphtheriae_NCTC11397,"Cpseudotuberculosis_31","Cpseudotuberculosis_ATCC19410","Culcerans_NCTC12077","Culcerans_NCTC7910"	1	0.225393	4.52217	1	0.225393	4.52216	0	12	1. 0.91437;2. 38;3. 112;4. 42;5. 42;6. 124;7. 47;8. 139;9. 67;10. T;11. ACC	1. 0.46156;2. 59;3. 175;4. 64;5. 63;6. 187;7. 71;8. 211;9. 124;10. T;11. ACT	1. 0.92147;2. 105;3. 313;4. 110;5. 109;6. 325;7. 117;8. 349;9. 262;10. T;11. ACC	1. 0.72632;2. 123;3. 367;4. 129;5. 127;6. 379;7. 135;8. 403;9. 316;10. S;11. AGC	1. 0.49241;2. 137;3. 409;4. 143;5. 141;6. 421;7. 149;8. 445;9. 358;10. I;11. ATC	1. 0.53108;2. 140;3. 418;4. 146;5. 144;6. 430;7. 152;8. 454;9. 367;10. K;11. AAA	1. 0.7624;2. 146;3. 436;4. 152;5. 150;6. 448;7. 158;8. 472;9. 385;10. F;11. TTT	1. 0.90229;2. 148;3. 442;4. 154;5. 152;6. 454;7. 160;8. 478;9. 391;10. A;11. GCT	1. 0.88467;2. 157;3. 469;4. 166;5. 161;6. 481;7. 169;8. 505;9. 418;10. K;11. AAA	1. 0.90954;2. 165;3. 493;4. 174;5. 169;6. 505;7. 177;8. 529;9. 442;10. V;11. GTT	1. 0.81389;2. 168;3. 502;4. 177;5. 172;6. 514;7. 180;8. 538;9. 451;10. I;11. ATT	1. 0.83973;2. 187;3. 559;4. 196;5. 191;6. 571;7. 199;8. 595;9. 508;10. E;11. GAA
ERS451417_02237	1717.62.peg.2262	1	1	1	1	15	Caurimucosum_ATCC700975,"Cbelfantii_FRC0043","Ccamporealensis_DSM44610","Cdiphtheriae_NCTC11397","Cfalsenii_DSM44353","Cjeikeium_K41","Ckroppenstedtii_DSM44385","Clactis_RW25","Cpseudotuberculosis_31","Cpseudotuberculosis_ATCC19410","Csilvaticum_KL0182","Csimulans_PES1","Culcerans_NCTC12077","Culcerans_NCTC7910","Curealyticum_DSM7109"	1	0.123176	2.10663	1	0.123176	2.10663	0	1	1. 0.90869;2. 231;3. 691;4. 240;5. 238;6. 712;7. 295;8. 883;9. 484;10. V;11. GTT
ERS451417_01939	1717.62.peg.1936	1	1	1	1	38	Cargentoratense_DSM44202,"Catypicum_R2070","Caurimucosum_ATCC700975","Cbelfantii_FRC0043","Ccallunae_DSM20147","Ccamporealensis_DSM44610","Cdeserti_GIMN1010","Cdiphtheriae_NCTC11397","Cdoosanense_DSM45436","Cefficiens_YS314","Cepidermidicanis_DSM45586","Cfalsenii_DSM44353","Cglutamicum_ATCC13032","Cglycinophilum_AJ3170","Chalotolerans_YIM70093","Chumireducens_DSM45392","Cimitans_DSM44264","Cjeike…	1	0.118932	1.96828	0.210351	0.118949	1.96495	0	2	1. 0.44638;2. 124;3. 370;4. 169;5. 169;6. 505;7. 237;8. 709;9. 343;10. S;11. TCC	1. 0.93044;2. 275;3. 823;4. 320;5. 320;6. 958;7. 388;8. 1162;9. 796;10. T;11. ACC
ERS451417_01706	1717.62.peg.1711	1	1	1	1	22	Catypicum_R2070,"Caurimucosum_ATCC700975","Cbelfantii_FRC0043","Ccallunae_DSM20147","Cdeserti_GIMN1010","Cdiphtheriae_NCTC11397","Cefficiens_YS314","Cglutamicum_ATCC13032","Chalotolerans_YIM70093","Chumireducens_DSM45392","Cimitans_DSM44264","Ckroppenstedtii_DSM44385","Cmarinum_DSM44953","Cpseudotuberculosis_31","Cpseudotuberculosis_ATCC19410","Csilvaticum_KL0182","Csimulans_PES1","Csingulare_IBS…	0.99999	0.116349	1.90125	1	0.116349	1.90126	0	1	1. 0.94827;2. 196;3. 586;4. 243;5. 243;6. 727;7. 249;8. 745;9. 559;10. S;11. TCA
ERS451417_02152	1717.62.peg.2175	NA	NA	NA	0.000439	16	Caurimucosum_ATCC700975,"Cbelfantii_FRC0043","Ccamporealensis_DSM44610","Cdiphtheriae_NCTC11397","Cfalsenii_DSM44353","Cjeikeium_K41","Ckutscheri_DSM20755","Clactis_RW25","Cmustelae_DSM45274","Cpseudotuberculosis_31","Cpseudotuberculosis_ATCC19410","Csilvaticum_KL0182","Csingulare_IBSB52218","Culcerans_NCTC12077","Culcerans_NCTC7910","Curealyticum_DSM7109"	0.137419	0.134059	2.23834	1	0.134943	2.24402	2	1	1. 0.7185;2. 401;3. 1201;4. 430;5. 422;6. 1264;7. 473;8. 1417;9. 961;10. V;11. GTC
ERS451417_00752	1717.62.peg.757	NA	NA	NA	0.001096	9	Cdeserti_GIMN1010,"Cdiphtheriae_NCTC11397","Ckutscheri_DSM20755","Cpseudotuberculosis_ATCC19410","Crouxii_FRC0190","Csilvaticum_KL0182","Culcerans_NCTC12077","Culcerans_NCTC7910","Cvitaeruminis_DSM20294"	1	0.0995515	2.32133	0.11273	0.11273	2.2863	4096	14	1. 0.44979;2. 21;3. 61;4. 59;5. 24;6. 70;7. 24;8. 70;9. 49;10. T;11. ACC	1. 0.91643;2. 27;3. 79;4. 66;5. 30;6. 88;7. 30;8. 88;9. 67;10. V;11. GTC	1. 0.92897;2. 31;3. 91;4. 70;5. 34;6. 100;7. 34;8. 100;9. 79;10. S;11. AGC	1. 0.8477;2. 49;3. 145;4. 88;5. 52;6. 154;7. 52;8. 154;9. 133;10. V;11. GTC	1. 0.89278;2. 88;3. 262;4. 133;5. 91;6. 271;7. 91;8. 271;9. 229;10. S;11. TCA	1. 0.59427;2. 116;3. 346;4. 179;5. 120;6. 358;7. 120;8. 358;9. 295;10. V;11. GTC	1. 0.90449;2. 210;3. 628;4. 291;5. 214;6. 640;7. 216;8. 646;9. 484;10. G;11. GGT	1. 0.88199;2. 217;3. 649;4. 298;5. 221;6. 661;7. 223;8. 667;9. 505;10. D;11. GAT	1. 0.93611;2. 218;3. 652;4. 299;5. 222;6. 664;7. 224;8. 670;9. 508;10. F;11. TTT	1. 0.64692;2. 232;3. 694;4. 313;5. 236;6. 706;7. 238;8. 712;9. 544;10. I;11. ATA	1. 0.94209;2. 254;3. 760;4. 343;5. 258;6. 772;7. 260;8. 778;9. 610;10. R;11. CGG	1. 0.88392;2. 265;3. 793;4. 354;5. 269;6. 805;7. 271;8. 811;9. 643;10. A;11. GCC	1. 0.92686;2. 269;3. 805;4. 358;5. 273;6. 817;7. 275;8. 823;9. 655;10. S;11. AGC	1. 0.84502;2. 291;3. 871;4. 381;5. 295;6. 883;7. 297;8. 889;9. 721;10. A;11. GCG
ERS451417_01369	1717.62.peg.1378	NA	NA	NA	0.01066	20	Cbelfantii_FRC0043,"Cdeserti_GIMN1010","Cdiphtheriae_NCTC11397","Cdoosanense_DSM45436","Cefficiens_YS314","Cglutamicum_ATCC13032","Chalotolerans_YIM70093","Chumireducens_DSM45392","Ckutscheri_DSM20755","Cmarinum_DSM44953","Cmaris_DSM45190","Cmustelae_DSM45274","Cpseudotuberculosis_31","Cpseudotuberculosis_ATCC19410","Csilvaticum_KL0182","Ctestudinoris_DSM44614","Culcerans_NCTC12077","Culcerans_NC…	0.264292	0.264292	1.533	0.877714	0.26287	1.5291	2306	0
ERS451417_01740	1717.62.peg.1744	NA	NA	NA	0.01126	6	Cdiphtheriae_NCTC11397,"Cpseudotuberculosis_31","Cpseudotuberculosis_ATCC19410","Csilvaticum_KL0182","Culcerans_NCTC12077","Culcerans_NCTC7910"	3.23973	0.203388	2.76786	0.201602	0.201592	2.74273	2048	4	1. 0.57904;2. 303;3. 907;4. 345;5. 316;6. 946;7. 332;8. 994;9. 787;10. N;11. AAC	1. 0.68959;2. 463;3. 1387;4. 520;5. 476;6. 1426;7. 494;8. 1480;9. 1195;10. D;11. GAT	1. 0.71238;2. 664;3. 1990;4. 751;5. 700;6. 2098;7. 746;8. 2236;9. 1531;10. P;11. CCT	1. 0.70478;2. 827;3. 2479;4. 1152;5. 878;6. 2632;7. 931;8. 2791;9. 1912;10. D;11. GAC
ERS451417_01440	1717.62.peg.1447	NA	NA	NA	0.01212	37	Cargentoratense_DSM44202,"Catypicum_R2070","Caurimucosum_ATCC700975","Cbelfantii_FRC0043","Ccallunae_DSM20147","Ccamporealensis_DSM44610","Cdeserti_GIMN1010","Cdiphtheriae_NCTC11397","Cdoosanense_DSM45436","Cefficiens_YS314","Cepidermidicanis_DSM45586","Cfalsenii_DSM44353","Cglutamicum_ATCC13032","Cglycinophilum_AJ3170","Chalotolerans_YIM70093","Chumireducens_DSM45392","Cimitans_DSM44264","Cjeike…	0.149265	0.110414	1.49699	0.110364	0.110364	1.49577	4098	18	1. 0.43023;2. 186;3. 556;4. 228;5. 228;6. 682;7. 305;8. 913;9. 535;10. T;11. ACT	1. 0.41671;2. 283;3. 847;4. 331;5. 331;6. 991;7. 411;8. 1231;9. 790;10. H;11. CAC	1. 0.42177;2. 428;3. 1282;4. 476;5. 476;6. 1426;7. 556;8. 1666;9. 1225;10. E;11. GAA	1. 0.44302;2. 431;3. 1291;4. 479;5. 479;6. 1435;7. 559;8. 1675;9. 1234;10. N;11. AAT	1. 0.91339;2. 455;3. 1363;4. 503;5. 503;6. 1507;7. 583;8. 1747;9. 1306;10. V;11. GTC	1. 0.79291;2. 459;3. 1375;4. 507;5. 507;6. 1519;7. 587;8. 1759;9. 1318;10. H;11. CAT	1. 0.53522;2. 461;3. 1381;4. 509;5. 509;6. 1525;7. 589;8. 1765;9. 1324;10. L;11. CTA	1. 0.52219;2. 533;3. 1597;4. 584;5. 584;6. 1750;7. 692;8. 2074;9. 1486;10. K;11. AAA	1. 0.57888;2. 566;3. 1696;4. 617;5. 617;6. 1849;7. 725;8. 2173;9. 1585;10. G;11. GGT	1. 0.454;2. 580;3. 1738;4. 631;5. 631;6. 1891;7. 739;8. 2215;9. 1627;10. T;11. ACC	1. 0.45474;2. 608;3. 1822;4. 659;5. 659;6. 1975;7. 767;8. 2299;9. 1711;10. G;11. GGT	1. 0.4341;2. 626;3. 1876;4. 677;5. 677;6. 2029;7. 785;8. 2353;9. 1765;10. D;11. GAT	1. 0.43951;2. 686;3. 2056;4. 737;5. 737;6. 2209;7. 845;8. 2533;9. 1945;10. R;11. CGA	1. 0.4738;2. 730;3. 2188;4. 781;5. 781;6. 2341;7. 891;8. 2671;9. 2050;10. R;11. CGT	1. 0.64083;2. 733;3. 2197;4. 784;5. 784;6. 2350;7. 894;8. 2680;9. 2059;10. A;11. GCC	1. 0.9726;2. 805;3. 2413;4. 878;5. 878;6. 2632;7. 1057;8. 3169;9. 2173;10. V;11. GTA	1. 0.50241;2. 824;3. 2470;4. 897;5. 897;6. 2689;7. 1076;8. 3226;9. 2230;10. V;11. GTA	1. 0.64921;2. 831;3. 2491;4. 904;5. 904;6. 2710;7. 1083;8. 3247;9. 2251;10. A;11. GCA
ERS451417_01649	1717.62.peg.1656	NA	NA	NA	0.01863	37	Cargentoratense_DSM44202,"Catypicum_R2070","Caurimucosum_ATCC700975","Cbelfantii_FRC0043","Ccallunae_DSM20147","Ccamporealensis_DSM44610","Cdeserti_GIMN1010","Cdiphtheriae_NCTC11397","Cdoosanense_DSM45436","Cefficiens_YS314","Cepidermidicanis_DSM45586","Cfalsenii_DSM44353","Cglutamicum_ATCC13032","Cglycinophilum_AJ3170","Chalotolerans_YIM70093","Chumireducens_DSM45392","Cimitans_DSM44264","Cjeike…	5.57156	0.187965	1.75741	0.198297	0.191487	1.7641	4096	1	1. 0.96148;2. 139;3. 415;4. 437;5. 145;6. 433;7. 145;8. 433;9. 376;10. I;11. ATC
ERS451417_01773	1717.62.peg.1775	NA	NA	NA	0.03035	23	Cargentoratense_DSM44202,"Cbelfantii_FRC0043","Ccallunae_DSM20147","Ccamporealensis_DSM44610","Cdeserti_GIMN1010","Cdiphtheriae_NCTC11397","Cefficiens_YS314","Cglutamicum_ATCC13032","Chalotolerans_YIM70093","Cimitans_DSM44264","Cjeikeium_K41","Ckutscheri_DSM20755","Clactis_RW25","Cmarinum_DSM44953","Cpseudotuberculosis_ATCC19410","Csilvaticum_KL0182","Csimulans_PES1","Ctestudinoris_DSM44614","Cul…	4.14475	0.169405	1.95324	0.16977	0.16977	1.95134	4096	1	1. 0.89622;2. 68;3. 202;4. 89;5. 79;6. 235;7. 90;8. 268;9. 184;10. R;11. CGC
ERS451417_00486	1717.62.peg.489	NA	NA	NA	0.05629	6	Cbelfantii_FRC0043,"Cdiphtheriae_NCTC11397","Cpseudotuberculosis_ATCC19410","Crouxii_FRC0190","Csilvaticum_KL0182","Culcerans_NCTC7910"	38.5886	0.194565	2.47433	0.205497	0.205497	2.45252	4352	0
ERS451417_01350	1717.62.peg.1358	NA	NA	NA	0.07016	38	Cargentoratense_DSM44202,"Catypicum_R2070","Caurimucosum_ATCC700975","Cbelfantii_FRC0043","Ccallunae_DSM20147","Ccamporealensis_DSM44610","Cdeserti_GIMN1010","Cdiphtheriae_NCTC11397","Cdoosanense_DSM45436","Cefficiens_YS314","Cepidermidicanis_DSM45586","Cfalsenii_DSM44353","Cglutamicum_ATCC13032","Cglycinophilum_AJ3170","Chalotolerans_YIM70093","Chumireducens_DSM45392","Cimitans_DSM44264","Cjeike…	0.170811	0.170811	1.59839	0.997803	0.170718	1.59934	258	0
ERS451417_00834	1717.62.peg.838	NA	NA	NA	0.07252	10	Cbelfantii_FRC0043,"Ccallunae_DSM20147","Cdiphtheriae_NCTC11397","Cefficiens_YS314","Ckutscheri_DSM20755","Cpseudotuberculosis_ATCC19410","Crouxii_FRC0190","Csilvaticum_KL0182","Culcerans_NCTC12077","Cvitaeruminis_DSM20294"	43.0424	0.110078	2.27369	0.255726	0.108858	2.27566	6144	1	1. 0.52917;2. 143;3. 427;4. 163;5. 155;6. 463;7. 163;8. 487;9. 319;10. D;11. GAT
ERS451417_02031	1717.62.peg.2036	NA	NA	NA	0.1148	19	Caurimucosum_ATCC700975,"Cbelfantii_FRC0043","Ccamporealensis_DSM44610","Cdiphtheriae_NCTC11397","Cdoosanense_DSM45436","Chalotolerans_YIM70093","Chumireducens_DSM45392","Cimitans_DSM44264","Cmarinum_DSM44953","Cpseudotuberculosis_31","Cpseudotuberculosis_ATCC19410","CriegeliiPUDD83A45","Csilvaticum_KL0182","Csimulans_PES1","Csingulare_IBSB52218","Ctestudinoris_DSM44614","Culcerans_NCTC12077","Cu…	0.22989	0.22989	1.92707	0.853665	0.229489	1.93251	3330	0
ERS451417_01953	1717.62.peg.1953	NA	NA	NA	0.1472	21	Cargentoratense_DSM44202,"Catypicum_R2070","Caurimucosum_ATCC700975","Cbelfantii_FRC0043","Ccallunae_DSM20147","Cdiphtheriae_NCTC11397","Cepidermidicanis_DSM45586","Cfalsenii_DSM44353","Cimitans_DSM44264","Cjeikeium_K41","Clactis_RW25","Cmarinum_DSM44953","Cpseudotuberculosis_31","Cpseudotuberculosis_ATCC19410","CriegeliiPUDD83A45","Csilvaticum_KL0182","Csimulans_PES1","Csingulare_IBSB52218","Cte…	0.218468	0.218468	2.24633	0.17417	0.167051	2.15193	258	0
ERS451417_01341	1717.62.peg.1349	NA	NA	NA	0.1472	35	Cargentoratense_DSM44202,"Catypicum_R2070","Caurimucosum_ATCC700975","Cbelfantii_FRC0043","Ccallunae_DSM20147","Ccamporealensis_DSM44610","Cdeserti_GIMN1010","Cdiphtheriae_NCTC11397","Cdoosanense_DSM45436","Cefficiens_YS314","Cepidermidicanis_DSM45586","Cfalsenii_DSM44353","Cglutamicum_ATCC13032","Cglycinophilum_AJ3170","Chalotolerans_YIM70093","Chumireducens_DSM45392","Cimitans_DSM44264","Ckropp…	0.263807	0.159854	1.45631	0.180511	0.160284	1.45549	7170	6	1. 0.41118;2. 60;3. 178;4. 95;5. 95;6. 283;7. 111;8. 331;9. 97;10. T;11. ACA	1. 0.62806;2. 143;3. 427;4. 187;5. 187;6. 559;7. 243;8. 727;9. 172;10. S;11. TCT	1. 0.46901;2. 221;3. 661;4. 265;5. 265;6. 793;7. 321;8. 961;9. 403;10. I;11. ATA	1. 0.50025;2. 284;3. 850;4. 331;5. 328;6. 982;7. 384;8. 1150;9. 592;10. N;11. AAT	1. 0.43633;2. 333;3. 997;4. 382;5. 379;6. 1135;7. 435;8. 1303;9. 727;10. G;11. GGT	1. 0.89545;2. 334;3. 1000;4. 383;5. 380;6. 1138;7. 436;8. 1306;9. 730;10. K;11. AAA
ERS451417_01786	1717.62.peg.1791	NA	NA	NA	0.1551	6	Cbelfantii_FRC0043,"Cdiphtheriae_NCTC11397","Cpseudotuberculosis_ATCC19410","Csilvaticum_KL0182","Culcerans_NCTC12077","Culcerans_NCTC7910"	0.290225	0.216246	2.81678	0.218817	0.218817	2.79462	4098	2	1. 0.5605;2. 98;3. 292;4. 180;5. 98;6. 292;7. 99;8. 295;9. 286;10. H;11. CAC	1. 0.86309;2. 133;3. 397;4. 258;5. 134;6. 400;7. 135;8. 403;9. 391;10. S;11. TCT
ERS451417_00568	1717.62.peg.571	NA	NA	NA	0.1789	38	Cargentoratense_DSM44202,"Catypicum_R2070","Caurimucosum_ATCC700975","Cbelfantii_FRC0043","Ccallunae_DSM20147","Ccamporealensis_DSM44610","Cdeserti_GIMN1010","Cdiphtheriae_NCTC11397","Cdoosanense_DSM45436","Cefficiens_YS314","Cepidermidicanis_DSM45586","Cfalsenii_DSM44353","Cglutamicum_ATCC13032","Cglycinophilum_AJ3170","Chalotolerans_YIM70093","Chumireducens_DSM45392","Cimitans_DSM44264","Cjeike…	0.233069	0.233069	1.59774	0.979948	0.232883	1.59882	3330	0
ERS451417_01304	1717.62.peg.1312	NA	NA	NA	0.1901	38	Cargentoratense_DSM44202,"Catypicum_R2070","Caurimucosum_ATCC700975","Cbelfantii_FRC0043","Ccallunae_DSM20147","Ccamporealensis_DSM44610","Cdeserti_GIMN1010","Cdiphtheriae_NCTC11397","Cdoosanense_DSM45436","Cefficiens_YS314","Cepidermidicanis_DSM45586","Cfalsenii_DSM44353","Cglutamicum_ATCC13032","Cglycinophilum_AJ3170","Chalotolerans_YIM70093","Chumireducens_DSM45392","Cimitans_DSM44264","Cjeike…	0.145605	0.145605	1.65533	0.975624	0.14587	1.65544	1282	0
ERS451417_01640	1717.62.peg.1647	NA	NA	NA	0.2045	38	Cargentoratense_DSM44202,"Catypicum_R2070","Caurimucosum_ATCC700975","Cbelfantii_FRC0043","Ccallunae_DSM20147","Ccamporealensis_DSM44610","Cdeserti_GIMN1010","Cdiphtheriae_NCTC11397","Cdoosanense_DSM45436","Cefficiens_YS314","Cepidermidicanis_DSM45586","Cfalsenii_DSM44353","Cglutamicum_ATCC13032","Cglycinophilum_AJ3170","Chalotolerans_YIM70093","Chumireducens_DSM45392","Cimitans_DSM44264","Cjeike…	0.250686	0.119533	1.75292	1	0.119592	1.75349	2	1	1. 0.84694;2. 426;3. 1276;4. 453;5. 453;6. 1357;7. 458;8. 1372;9. 1159;10. D;11. GAT
ERS451417_00959	1717.62.peg.966	NA	NA	NA	0.2452	39	Cargentoratense_DSM44202,"Catypicum_R2070","Caurimucosum_ATCC700975","Cbelfantii_FRC0043","Ccallunae_DSM20147","Ccamporealensis_DSM44610","Cdeserti_GIMN1010","Cdiphtheriae_NCTC11397","Cdoosanense_DSM45436","Cefficiens_YS314","Cepidermidicanis_DSM45586","Cfalsenii_DSM44353","Cglutamicum_ATCC13032","Cglycinophilum_AJ3170","Chalotolerans_YIM70093","Chumireducens_DSM45392","Cimitans_DSM44264","Cjeike…	0.318538	0.318538	1.71846	1	0.318733	1.71882	2	1	1. 0.43555;2. 66;3. 196;4. 66;5. 66;6. 196;7. 68;8. 202;9. 106;10. A;11. GCT
ERS451417_00342	1717.62.peg.345	NA	NA	NA	0.2463	33	Cargentoratense_DSM44202,"Catypicum_R2070","Caurimucosum_ATCC700975","Cbelfantii_FRC0043","Ccallunae_DSM20147","Ccamporealensis_DSM44610","Cdeserti_GIMN1010","Cdiphtheriae_NCTC11397","Cdoosanense_DSM45436","Cefficiens_YS314","Cepidermidicanis_DSM45586","Cglutamicum_ATCC13032","Chalotolerans_YIM70093","Chumireducens_DSM45392","Cimitans_DSM44264","Ckutscheri_DSM20755","Clactis_RW25","Cmarinum_DSM44…	0.849309	0.24216	1.68493	1	0.242454	1.68534	3074	2	1. 0.90855;2. 218;3. 652;4. 320;5. 274;6. 820;7. 309;8. 925;9. 538;10. V;11. GTT	1. 0.90717;2. 351;3. 1051;4. 515;5. 428;6. 1282;7. 484;8. 1450;9. 850;10. V;11. GTA
ERS451417_00512	1717.62.peg.516	NA	NA	NA	0.2999	8	Cbelfantii_FRC0043,"Cdiphtheriae_NCTC11397","Cpseudotuberculosis_31","Cpseudotuberculosis_ATCC19410","Crouxii_FRC0190","Csilvaticum_KL0182","Culcerans_NCTC12077","Culcerans_NCTC7910"	999	0.0781254	3.77662	1	0.0781359	3.77034	2308	0
ERS451417_01207	1717.62.peg.1215	NA	NA	NA	0.3438	8	Cbelfantii_FRC0043,"Cdiphtheriae_NCTC11397","Cpseudotuberculosis_31","Cpseudotuberculosis_ATCC19410","Crouxii_FRC0190","Csilvaticum_KL0182","Culcerans_NCTC12077","Culcerans_NCTC7910"	999	0.342041	3.49043	1	0.34293	3.49285	260	0
ERS451417_00989	1717.62.peg.1000	NA	NA	NA	0.3531	39	Cargentoratense_DSM44202,"Catypicum_R2070","Caurimucosum_ATCC700975","Cbelfantii_FRC0043","Ccallunae_DSM20147","Ccamporealensis_DSM44610","Cdeserti_GIMN1010","Cdiphtheriae_NCTC11397","Cdoosanense_DSM45436","Cefficiens_YS314","Cepidermidicanis_DSM45586","Cfalsenii_DSM44353","Cglutamicum_ATCC13032","Cglycinophilum_AJ3170","Chalotolerans_YIM70093","Chumireducens_DSM45392","Cimitans_DSM44264","Cjeike…	132.44	0.122453	1.73095	1	0.122501	1.73092	256	0
ERS451417_00529	1717.62.peg.532	NA	NA	NA	0.3575	7	Cbelfantii_FRC0043,"Cdiphtheriae_NCTC11397","Cpseudotuberculosis_ATCC19410","Crouxii_FRC0190","Csilvaticum_KL0182","Culcerans_NCTC12077","Culcerans_NCTC7910"	0.447589	0.291905	3.37533	0.289844	0.289844	3.25353	6146	7	1. 0.58348;2. 18;3. 52;4. 43;5. 18;6. 52;7. 18;8. 52;9. 31;10. T;11. ACT	1. 0.58529;2. 143;3. 427;4. 188;5. 146;6. 436;7. 152;8. 454;9. 322;10. A;11. GCA	1. 0.53746;2. 218;3. 652;4. 325;5. 232;6. 694;7. 238;8. 712;9. 493;10. G;11. GGA	1. 0.71088;2. 235;3. 703;4. 343;5. 249;6. 745;7. 255;8. 763;9. 544;10. P;11. CCG	1. 0.63307;2. 283;3. 847;4. 411;5. 297;6. 889;7. 312;8. 934;9. 589;10. R;11. CGC	1. 0.63139;2. 286;3. 856;4. 498;5. 300;6. 898;7. 315;8. 943;9. 598;10. T;11. ACC	1. 0.58587;2. 371;3. 1111;4. 595;5. 385;6. 1153;7. 400;8. 1198;9. 853;10. I;11. ATC
ERS451417_01930	1717.62.peg.1927	NA	NA	NA	0.3753	7	Cbelfantii_FRC0043,"Cdiphtheriae_NCTC11397","Cpseudotuberculosis_31","Cpseudotuberculosis_ATCC19410","Csilvaticum_KL0182","Culcerans_NCTC12077","Culcerans_NCTC7910"	999	0.423853	7.97725	1	0.423886	7.90241	260	0
ERS451417_00104	1717.62.peg.102	NA	NA	NA	0.3759	12	Cbelfantii_FRC0043,"Cdeserti_GIMN1010","Cdiphtheriae_NCTC11397","Cefficiens_YS314","Chalotolerans_YIM70093","Cpseudotuberculosis_31","Cpseudotuberculosis_ATCC19410","Crouxii_FRC0190","Csilvaticum_KL0182","Culcerans_NCTC12077","Culcerans_NCTC7910","Cvitaeruminis_DSM20294"	998.99	0.220248	2.11869	0.68795	0.219816	2.1167	260	0
ERS451417_00098	1717.62.peg.96	NA	NA	NA	0.3883	10	Cbelfantii_FRC0043,"Cdiphtheriae_NCTC11397","Cmustelae_DSM45274","Cpseudotuberculosis_31","Cpseudotuberculosis_ATCC19410","Crouxii_FRC0190","Csilvaticum_KL0182","Culcerans_NCTC12077","Culcerans_NCTC7910","Cvitaeruminis_DSM20294"	999	0.13577	3.13306	1	0.135584	3.12339	4	1	1. 0.55809;2. 133;3. 397;4. 164;5. 136;6. 406;7. 136;8. 406;9. 334;10. L;11. CTA
ERS451417_00071	1717.62.peg.67	NA	NA	NA	0.4109	15	Caurimucosum_ATCC700975,"Cbelfantii_FRC0043","Cdiphtheriae_NCTC11397","Cepidermidicanis_DSM45586","Ckutscheri_DSM20755","Clactis_RW25","Cmustelae_DSM45274","Cpseudotuberculosis_31","Cpseudotuberculosis_ATCC19410","CriegeliiPUDD83A45","Crouxii_FRC0190","Csilvaticum_KL0182","Culcerans_NCTC12077","Culcerans_NCTC7910","Cvitaeruminis_DSM20294"	999	0.31381	2.42891	1	0.313826	2.42736	4	1	1. 0.47442;2. 136;3. 406;4. 158;5. 158;6. 472;7. 181;8. 541;9. 388;10. I;11. ATT
ERS451417_00195	1717.62.peg.192	NA	NA	NA	0.4177	32	Cargentoratense_DSM44202,"Catypicum_R2070","Caurimucosum_ATCC700975","Cbelfantii_FRC0043","Ccallunae_DSM20147","Ccamporealensis_DSM44610","Cdeserti_GIMN1010","Cdiphtheriae_NCTC11397","Cefficiens_YS314","Cepidermidicanis_DSM45586","Cfalsenii_DSM44353","Cglutamicum_ATCC13032","Cglycinophilum_AJ3170","Chumireducens_DSM45392","Cjeikeium_K41","Ckutscheri_DSM20755","Clactis_RW25","Cmarinum_DSM44953","C…	145.18	0.288571	1.73256	0.999981	0.288571	1.73261	3072	1	1. 0.96943;2. 17;3. 49;4. 34;5. 34;6. 100;7. 48;8. 142;9. 28;10. K;11. AAG
ERS451417_01358	1717.62.peg.1366	NA	NA	NA	0.4194	8	Cbelfantii_FRC0043,"Cdiphtheriae_NCTC11397","Cmustelae_DSM45274","Cpseudotuberculosis_31","Cpseudotuberculosis_ATCC19410","Csilvaticum_KL0182","Culcerans_NCTC12077","Culcerans_NCTC7910"	999	0.178247	3.09908	1	0.179729	3.10543	260	0
ERS451417_01660	1717.62.peg.1667	NA	NA	NA	0.4213	38	Cargentoratense_DSM44202,"Catypicum_R2070","Caurimucosum_ATCC700975","Cbelfantii_FRC0043","Ccallunae_DSM20147","Ccamporealensis_DSM44610","Cdeserti_GIMN1010","Cdiphtheriae_NCTC11397","Cdoosanense_DSM45436","Cefficiens_YS314","Cepidermidicanis_DSM45586","Cfalsenii_DSM44353","Cglutamicum_ATCC13032","Cglycinophilum_AJ3170","Chalotolerans_YIM70093","Chumireducens_DSM45392","Cimitans_DSM44264","Cjeike…	0.403116	0.20736	1.613	1	0.207389	1.61366	2	1	1. 0.86765;2. 178;3. 532;4. 195;5. 195;6. 583;7. 248;8. 742;9. 388;10. V;11. GTT
ERS451417_01755	1717.62.peg.1758	NA	NA	NA	0.4288	35	Caurimucosum_ATCC700975,"Cbelfantii_FRC0043","Ccallunae_DSM20147","Ccamporealensis_DSM44610","Cdeserti_GIMN1010","Cdiphtheriae_NCTC11397","Cdoosanense_DSM45436","Cefficiens_YS314","Cepidermidicanis_DSM45586","Cfalsenii_DSM44353","Cglutamicum_ATCC13032","Cglycinophilum_AJ3170","Chalotolerans_YIM70093","Chumireducens_DSM45392","Cimitans_DSM44264","Cjeikeium_K41","Ckutscheri_DSM20755","Clactis_RW25"…	999	0.217039	1.70093	1	0.217094	1.7007	3332	0
ERS451417_00670	1717.62.peg.677	NA	NA	NA	0.434	16	Cargentoratense_DSM44202,"Cbelfantii_FRC0043","Cdiphtheriae_NCTC11397","Cefficiens_YS314","Cepidermidicanis_DSM45586","Ckroppenstedtii_DSM44385","Ckutscheri_DSM20755","Clactis_RW25","Cmustelae_DSM45274","Cpseudotuberculosis_31","Cpseudotuberculosis_ATCC19410","Crouxii_FRC0190","Csilvaticum_KL0182","Culcerans_NCTC12077","Culcerans_NCTC7910","Cvitaeruminis_DSM20294"	0.120802	0.0865249	2.18786	0.0865108	0.0865108	2.18709	2	1	1. 0.64378;2. 97;3. 289;4. 123;5. 109;6. 325;7. 118;8. 352;9. 217;10. D;11. GAC
ERS451417_00722	1717.62.peg.727	NA	NA	NA	0.4374	19	Caurimucosum_ATCC700975,"Cbelfantii_FRC0043","Ccamporealensis_DSM44610","Cdiphtheriae_NCTC11397","Cfalsenii_DSM44353","Cglycinophilum_AJ3170","Ckroppenstedtii_DSM44385","Ckutscheri_DSM20755","Cmustelae_DSM45274","Cpseudotuberculosis_31","Cpseudotuberculosis_ATCC19410","Crouxii_FRC0190","Csilvaticum_KL0182","Csimulans_PES1","Csingulare_IBSB52218","Cterpenotabidum_Y11","Culcerans_NCTC12077","Culcer…	0.0813354	0.0813354	1.99226	0.0872101	0.0872101	2.02053	258	0
ERS451417_00326	1717.62.peg.328	NA	NA	NA	0.4543	39	Cargentoratense_DSM44202,"Catypicum_R2070","Caurimucosum_ATCC700975","Cbelfantii_FRC0043","Ccallunae_DSM20147","Ccamporealensis_DSM44610","Cdeserti_GIMN1010","Cdiphtheriae_NCTC11397","Cdoosanense_DSM45436","Cefficiens_YS314","Cepidermidicanis_DSM45586","Cfalsenii_DSM44353","Cglutamicum_ATCC13032","Cglycinophilum_AJ3170","Chalotolerans_YIM70093","Chumireducens_DSM45392","Cimitans_DSM44264","Cjeike…	0.207122	0.207122	1.67464	0.993287	0.207078	1.67491	1282	0
ERS451417_01201	1717.62.peg.1209	NA	NA	NA	0.4547	26	Caurimucosum_ATCC700975,"Cbelfantii_FRC0043","Ccallunae_DSM20147","Ccamporealensis_DSM44610","Cdeserti_GIMN1010","Cdiphtheriae_NCTC11397","Cefficiens_YS314","Cepidermidicanis_DSM45586","Cglutamicum_ATCC13032","Chalotolerans_YIM70093","Chumireducens_DSM45392","Cimitans_DSM44264","Cmarinum_DSM44953","Cmaris_DSM45190","Cmustelae_DSM45274","Cpseudotuberculosis_31","Cpseudotuberculosis_ATCC19410","Cri…	599.967	0.136694	1.70736	1	0.136712	1.70717	3332	0
ERS451417_00812	1717.62.peg.818	NA	NA	NA	0.462	39	Cargentoratense_DSM44202,"Catypicum_R2070","Caurimucosum_ATCC700975","Cbelfantii_FRC0043","Ccallunae_DSM20147","Ccamporealensis_DSM44610","Cdeserti_GIMN1010","Cdiphtheriae_NCTC11397","Cdoosanense_DSM45436","Cefficiens_YS314","Cepidermidicanis_DSM45586","Cfalsenii_DSM44353","Cglutamicum_ATCC13032","Cglycinophilum_AJ3170","Chalotolerans_YIM70093","Chumireducens_DSM45392","Cimitans_DSM44264","Cjeike…	0.227057	0.0902122	1.79296	0.127623	0.0902213	1.79307	3074	2	1. 0.67867;2. 238;3. 712;4. 291;5. 291;6. 871;7. 413;8. 1237;9. 412;10. T;11. ACC	1. 0.68146;2. 1050;3. 3148;4. 1168;5. 1168;6. 3502;7. 1378;8. 4132;9. 2398;10. P;11. CCG
ERS451417_00452	1717.62.peg.456	NA	NA	NA	0.4629	10	Cbelfantii_FRC0043,"Cdiphtheriae_NCTC11397","Cepidermidicanis_DSM45586","Cmustelae_DSM45274","Cpseudotuberculosis_31","Cpseudotuberculosis_ATCC19410","Crouxii_FRC0190","Csilvaticum_KL0182","Culcerans_NCTC12077","Culcerans_NCTC7910"	0.411596	0.208022	2.29022	0.323733	0.207433	2.14731	2	1	1. 0.81028;2. 181;3. 541;4. 219;5. 200;6. 598;7. 204;8. 610;9. 469;10. A;11. GCA
ERS451417_00381	1717.62.peg.381	NA	NA	NA	0.4731	9	Cbelfantii_FRC0043,"Cdiphtheriae_NCTC11397","Cglycinophilum_AJ3170","Cpseudotuberculosis_31","Cpseudotuberculosis_ATCC19410","Crouxii_FRC0190","Csilvaticum_KL0182","Culcerans_NCTC12077","Culcerans_NCTC7910"	1.31465	0.211498	3.60052	0.528814	0.211732	3.59041	1024	2	1. 0.69569;2. 247;3. 739;4. 336;5. 318;6. 952;7. 400;8. 1198;9. 562;10. Q;11. CAG	1. 0.89736;2. 327;3. 979;4. 427;5. 404;6. 1210;7. 486;8. 1456;9. 793;10. V;11. GTT
ERS451417_00708	1717.62.peg.713	NA	NA	NA	0.4778	39	Cargentoratense_DSM44202,"Catypicum_R2070","Caurimucosum_ATCC700975","Cbelfantii_FRC0043","Ccallunae_DSM20147","Ccamporealensis_DSM44610","Cdeserti_GIMN1010","Cdiphtheriae_NCTC11397","Cdoosanense_DSM45436","Cefficiens_YS314","Cepidermidicanis_DSM45586","Cfalsenii_DSM44353","Cglutamicum_ATCC13032","Cglycinophilum_AJ3170","Chalotolerans_YIM70093","Chumireducens_DSM45392","Cimitans_DSM44264","Cjeike…	0.16098	0.16098	1.88953	0.180284	0.161177	1.9225	258	0
ERS451417_01747	1717.62.peg.1750	NA	NA	NA	0.4851	28	Catypicum_R2070,"Caurimucosum_ATCC700975","Cbelfantii_FRC0043","Ccallunae_DSM20147","Ccamporealensis_DSM44610","Cdeserti_GIMN1010","Cdiphtheriae_NCTC11397","Cdoosanense_DSM45436","Cefficiens_YS314","Cepidermidicanis_DSM45586","Cglutamicum_ATCC13032","Chalotolerans_YIM70093","Chumireducens_DSM45392","Cimitans_DSM44264","Ckutscheri_DSM20755","Cmarinum_DSM44953","Cmaris_DSM45190","Cmustelae_DSM45274…	51.4156	0.28181	1.81702	1	0.281818	1.81668	3072	1	1. 0.9741;2. 112;3. 334;4. 126;5. 116;6. 346;7. 127;8. 379;9. 256;10. D;11. GAT
ERS451417_01301	1717.62.peg.1309	NA	NA	NA	0.4916	38	Cargentoratense_DSM44202,"Catypicum_R2070","Caurimucosum_ATCC700975","Cbelfantii_FRC0043","Ccallunae_DSM20147","Ccamporealensis_DSM44610","Cdeserti_GIMN1010","Cdiphtheriae_NCTC11397","Cdoosanense_DSM45436","Cefficiens_YS314","Cepidermidicanis_DSM45586","Cfalsenii_DSM44353","Cglutamicum_ATCC13032","Cglycinophilum_AJ3170","Chalotolerans_YIM70093","Chumireducens_DSM45392","Cimitans_DSM44264","Cjeike…	447.198	0.12248	1.60468	1	0.12248	1.60446	4	1	1. 0.93931;2. 249;3. 745;4. 273;5. 273;6. 817;7. 299;8. 895;9. 676;10. A;11. GCT
ERS451417_01751	1717.62.peg.1754	NA	NA	NA	0.4983	8	Cbelfantii_FRC0043,"Cdiphtheriae_NCTC11397","Ckutscheri_DSM20755","Cpseudotuberculosis_ATCC19410","Csilvaticum_KL0182","Culcerans_NCTC12077","Culcerans_NCTC7910","Cvitaeruminis_DSM20294"	0.104915	0.0587679	2.00998	0.0629717	0.0629717	2.01004	4098	3	1. 0.47277;2. 86;3. 256;4. 148;5. 89;6. 265;7. 89;8. 265;9. 184;10. S;11. TCT	1. 0.5326;2. 102;3. 304;4. 165;5. 105;6. 313;7. 105;8. 313;9. 232;10. I;11. ATC	1. 0.40672;2. 120;3. 358;4. 190;5. 123;6. 367;7. 123;8. 367;9. 286;10. S;11. TCA
ERS451417_01361	1717.62.peg.1369	NA	NA	NA	0.4987	38	Cargentoratense_DSM44202,"Catypicum_R2070","Caurimucosum_ATCC700975","Cbelfantii_FRC0043","Ccallunae_DSM20147","Ccamporealensis_DSM44610","Cdeserti_GIMN1010","Cdiphtheriae_NCTC11397","Cdoosanense_DSM45436","Cefficiens_YS314","Cepidermidicanis_DSM45586","Cfalsenii_DSM44353","Cglutamicum_ATCC13032","Cglycinophilum_AJ3170","Chalotolerans_YIM70093","Chumireducens_DSM45392","Cimitans_DSM44264","Cjeike…	316.751	0.143092	1.76481	0.561603	0.143141	1.76472	260	0
ERS451417_00067	1717.62.peg.63	NA	NA	NA	0.4992	15	Cbelfantii_FRC0043,"Cdiphtheriae_NCTC11397","Cdoosanense_DSM45436","Cefficiens_YS314","Chalotolerans_YIM70093","Chumireducens_DSM45392","Cmarinum_DSM44953","Cpseudotuberculosis_31","Cpseudotuberculosis_ATCC19410","Crouxii_FRC0190","Csilvaticum_KL0182","Ctestudinoris_DSM44614","Culcerans_NCTC12077","Culcerans_NCTC7910","Cvitaeruminis_DSM20294"	999	0.110029	1.95138	1	0.110086	1.95136	2308	0
ERS451417_02322	1717.62.peg.2349	NA	NA	NA	0.508	11	Cbelfantii_FRC0043,"Cdiphtheriae_NCTC11397","Cepidermidicanis_DSM45586","Ckutscheri_DSM20755","Cmustelae_DSM45274","Cpseudotuberculosis_31","Cpseudotuberculosis_ATCC19410","Csilvaticum_KL0182","Culcerans_NCTC12077","Culcerans_NCTC7910","Cvitaeruminis_DSM20294"	999	0.270783	2.28622	1	0.270875	2.285	2052	1	1. 0.42312;2. 181;3. 541;4. 237;5. 183;6. 547;7. 191;8. 571;9. 328;10. E;11. GAG
ERS451417_00470	1717.62.peg.474	NA	NA	NA	0.5094	8	Cbelfantii_FRC0043,"Cdiphtheriae_NCTC11397","Cpseudotuberculosis_31","Cpseudotuberculosis_ATCC19410","Crouxii_FRC0190","Csilvaticum_KL0182","Culcerans_NCTC12077","Culcerans_NCTC7910"	128.413	0.157703	2.98901	1	0.158206	2.99559	256	0
ERS451417_02138	1717.62.peg.2158	NA	NA	NA	0.5161	6	Cbelfantii_FRC0043,"Cdiphtheriae_NCTC11397","Cpseudotuberculosis_31","Cpseudotuberculosis_ATCC19410","Culcerans_NCTC12077","Culcerans_NCTC7910"	999	0.227094	2.61564	1	0.227752	2.61551	260	0
ERS451417_01373	1717.62.peg.1382	NA	NA	NA	0.5202	38	Cargentoratense_DSM44202,"Catypicum_R2070","Caurimucosum_ATCC700975","Cbelfantii_FRC0043","Ccallunae_DSM20147","Ccamporealensis_DSM44610","Cdeserti_GIMN1010","Cdiphtheriae_NCTC11397","Cdoosanense_DSM45436","Cefficiens_YS314","Cepidermidicanis_DSM45586","Cfalsenii_DSM44353","Cglutamicum_ATCC13032","Cglycinophilum_AJ3170","Chalotolerans_YIM70093","Chumireducens_DSM45392","Cimitans_DSM44264","Cjeike…	351.174	0.11617	1.95613	1	0.11618	1.956	1028	1	1. 0.79567;2. 288;3. 862;4. 300;5. 300;6. 898;7. 485;8. 1453;9. 745;10. R;11. AGA
ERS451417_01244	1717.62.peg.1252	NA	NA	NA	0.5302	16	Cbelfantii_FRC0043,"Ccallunae_DSM20147","Cdeserti_GIMN1010","Cdiphtheriae_NCTC11397","Cefficiens_YS314","Cglutamicum_ATCC13032","Chalotolerans_YIM70093","Chumireducens_DSM45392","Cmarinum_DSM44953","Cpseudotuberculosis_31","Cpseudotuberculosis_ATCC19410","Crouxii_FRC0190","Csilvaticum_KL0182","Culcerans_NCTC12077","Culcerans_NCTC7910","Cvitaeruminis_DSM20294"	150.934	0.322504	1.67481	1	0.322596	1.675	260	0
ERS451417_00401	1717.62.peg.401	NA	NA	NA	0.5392	38	Cargentoratense_DSM44202,"Catypicum_R2070","Caurimucosum_ATCC700975","Cbelfantii_FRC0043","Ccallunae_DSM20147","Ccamporealensis_DSM44610","Cdeserti_GIMN1010","Cdiphtheriae_NCTC11397","Cdoosanense_DSM45436","Cefficiens_YS314","Cepidermidicanis_DSM45586","Cfalsenii_DSM44353","Cglutamicum_ATCC13032","Cglycinophilum_AJ3170","Chalotolerans_YIM70093","Chumireducens_DSM45392","Cimitans_DSM44264","Cjeike…	1.16582	0.109583	1.92005	0.476716	0.10965	1.92016	6144	1	1. 0.90915;2. 97;3. 289;4. 98;5. 98;6. 292;7. 98;8. 292;9. 214;10. R;11. CGT
ERS451417_00372	1717.62.peg.371	NA	NA	NA	0.5452	5	Cdiphtheriae_NCTC11397,"Cpseudotuberculosis_ATCC19410","Crouxii_FRC0190","Csilvaticum_KL0182","Culcerans_NCTC12077"	0.342317	0.150541	2.47339	0.250222	0.152337	2.46649	4098	14	1. 0.40901;2. 33;3. 97;4. 37;5. 34;6. 100;7. 35;8. 103;9. 58;10. P;11. CCT	1. 0.91596;2. 62;3. 184;4. 66;5. 63;6. 187;7. 64;8. 190;9. 145;10. E;11. GAA	1. 0.40387;2. 74;3. 220;4. 78;5. 75;6. 223;7. 76;8. 226;9. 181;10. A;11. GCC	1. 0.56111;2. 111;3. 331;4. 115;5. 112;6. 334;7. 113;8. 337;9. 292;10. S;11. TCA	1. 0.4601;2. 114;3. 340;4. 118;5. 115;6. 343;7. 116;8. 346;9. 301;10. A;11. GCT	1. 0.83257;2. 124;3. 370;4. 130;5. 125;6. 373;7. 126;8. 376;9. 331;10. D;11. GAC	1. 0.88111;2. 128;3. 382;4. 134;5. 129;6. 385;7. 130;8. 388;9. 343;10. E;11. GAA	1. 0.58586;2. 129;3. 385;4. 135;5. 130;6. 388;7. 131;8. 391;9. 346;10. K;11. AAA	1. 0.45205;2. 136;3. 406;4. 142;5. 137;6. 409;7. 138;8. 412;9. 367;10. G;11. GGC	1. 0.86895;2. 176;3. 526;4. 182;5. 177;6. 529;7. 178;8. 532;9. 487;10. T;11. ACA	1. 0.46218;2. 192;3. 574;4. 199;5. 193;6. 577;7. 194;8. 580;9. 535;10. R;11. AGA	1. 0.59807;2. 207;3. 619;4. 214;5. 208;6. 622;7. 209;8. 625;9. 580;10. S;11. TCA	1. 0.58664;2. 218;3. 652;4. 225;5. 219;6. 655;7. 220;8. 658;9. 613;10. N;11. AAC	1. 0.40044;2. 235;3. 703;4. 242;5. 236;6. 706;7. 237;8. 709;9. 664;10. M;11. ATG
ERS451417_01164	1717.62.peg.1175	NA	NA	NA	0.5587	37	Cargentoratense_DSM44202,"Catypicum_R2070","Caurimucosum_ATCC700975","Cbelfantii_FRC0043","Ccallunae_DSM20147","Ccamporealensis_DSM44610","Cdeserti_GIMN1010","Cdiphtheriae_NCTC11397","Cdoosanense_DSM45436","Cefficiens_YS314","Cfalsenii_DSM44353","Cglutamicum_ATCC13032","Cglycinophilum_AJ3170","Chalotolerans_YIM70093","Chumireducens_DSM45392","Cimitans_DSM44264","Cjeikeium_K41","Ckroppenstedtii_DS…	589.733	0.171332	1.6156	0.99999	0.171322	1.61489	3076	1	1. 0.93189;2. 265;3. 793;4. 289;5. 287;6. 859;7. 358;8. 1072;9. 553;10. A;11. GCG
ERS451417_01234	1717.62.peg.1242	NA	NA	NA	0.5595	15	Cargentoratense_DSM44202,"Cbelfantii_FRC0043","Cdiphtheriae_NCTC11397","Cepidermidicanis_DSM45586","Ckroppenstedtii_DSM44385","Ckutscheri_DSM20755","Clactis_RW25","Cmustelae_DSM45274","Cpseudotuberculosis_31","Cpseudotuberculosis_ATCC19410","Crouxii_FRC0190","Csilvaticum_KL0182","Culcerans_NCTC12077","Culcerans_NCTC7910","Cvitaeruminis_DSM20294"	999	0.171169	2.31501	1	0.17116	2.31487	260	0
ERS451417_01792	1717.62.peg.1797	NA	NA	NA	0.5707	38	Cargentoratense_DSM44202,"Catypicum_R2070","Caurimucosum_ATCC700975","Cbelfantii_FRC0043","Ccallunae_DSM20147","Ccamporealensis_DSM44610","Cdeserti_GIMN1010","Cdiphtheriae_NCTC11397","Cdoosanense_DSM45436","Cefficiens_YS314","Cepidermidicanis_DSM45586","Cfalsenii_DSM44353","Cglutamicum_ATCC13032","Cglycinophilum_AJ3170","Chalotolerans_YIM70093","Chumireducens_DSM45392","Cimitans_DSM44264","Cjeike…	0.270046	0.222344	1.62714	0.222346	0.222346	1.62673	1026	1	1. 0.78309;2. 222;3. 664;4. 271;5. 271;6. 811;7. 469;8. 1405;9. 547;10. A;11. GCC
ERS451417_00900	1717.62.peg.906	NA	NA	NA	0.6161	39	Cargentoratense_DSM44202,"Catypicum_R2070","Caurimucosum_ATCC700975","Cbelfantii_FRC0043","Ccallunae_DSM20147","Ccamporealensis_DSM44610","Cdeserti_GIMN1010","Cdiphtheriae_NCTC11397","Cdoosanense_DSM45436","Cefficiens_YS314","Cepidermidicanis_DSM45586","Cfalsenii_DSM44353","Cglutamicum_ATCC13032","Cglycinophilum_AJ3170","Chalotolerans_YIM70093","Chumireducens_DSM45392","Cimitans_DSM44264","Cjeike…	0.531037	0.144556	1.71286	0.999962	0.144566	1.71284	2050	1	1. 0.92899;2. 39;3. 115;4. 63;5. 63;6. 187;7. 92;8. 274;9. 1;10. G;11. GGC
ERS451417_02150	1717.62.peg.2172	NA	NA	NA	0.6422	8	Cbelfantii_FRC0043,"Cdiphtheriae_NCTC11397","Clactis_RW25","Cpseudotuberculosis_31","Cpseudotuberculosis_ATCC19410","Csilvaticum_KL0182","Culcerans_NCTC12077","Culcerans_NCTC7910"	187.706	0.0934907	3.01985	1	0.0935695	3.01999	4	1	1. 0.67514;2. 150;3. 448;4. 185;5. 185;6. 553;7. 185;8. 553;9. 448;10. G;11. GGT
ERS451417_01205	1717.62.peg.1213	NA	NA	NA	0.6564	8	Cbelfantii_FRC0043,"Cdiphtheriae_NCTC11397","Cpseudotuberculosis_31","Cpseudotuberculosis_ATCC19410","Crouxii_FRC0190","Culcerans_NCTC12077","Culcerans_NCTC7910","Cvitaeruminis_DSM20294"	999	0.112625	2.52467	1	0.112921	2.52253	4	1	1. 0.42177;2. 35;3. 103;4. 37;5. 35;6. 103;7. 35;8. 103;9. 85;10. I;11. ATT
ERS451417_02379	1717.62.peg.2410	NA	NA	NA	0.6632	31	Cargentoratense_DSM44202,"Catypicum_R2070","Caurimucosum_ATCC700975","Cbelfantii_FRC0043","Ccallunae_DSM20147","Ccamporealensis_DSM44610","Cdeserti_GIMN1010","Cdiphtheriae_NCTC11397","Cdoosanense_DSM45436","Cefficiens_YS314","Cepidermidicanis_DSM45586","Cglutamicum_ATCC13032","Chalotolerans_YIM70093","Chumireducens_DSM45392","Cimitans_DSM44264","Ckutscheri_DSM20755","Cmarinum_DSM44953","Cmaris_DS…	0.845078	0.164278	1.89667	0.476731	0.164278	1.89652	2	2	1. 0.92203;2. 213;3. 637;4. 243;5. 225;6. 673;7. 236;8. 706;9. 574;10. E;11. GAA	1. 0.46761;2. 262;3. 784;4. 293;5. 275;6. 823;7. 288;8. 862;9. 712;10. E;11. GAG
ERS451417_00733	1717.62.peg.736	NA	NA	NA	0.7477	39	Cargentoratense_DSM44202,"Catypicum_R2070","Caurimucosum_ATCC700975","Cbelfantii_FRC0043","Ccallunae_DSM20147","Ccamporealensis_DSM44610","Cdeserti_GIMN1010","Cdiphtheriae_NCTC11397","Cdoosanense_DSM45436","Cefficiens_YS314","Cepidermidicanis_DSM45586","Cfalsenii_DSM44353","Cglutamicum_ATCC13032","Cglycinophilum_AJ3170","Chalotolerans_YIM70093","Chumireducens_DSM45392","Cimitans_DSM44264","Cjeike…	0.383894	0.137969	1.81105	0.252456	0.137978	1.81126	2	1	1. 0.84256;2. 158;3. 472;4. 188;5. 188;6. 562;7. 200;8. 598;9. 355;10. G;11. GGC
ERS451417_00999	1717.62.peg.1010	NA	NA	NA	0.7497	39	Cargentoratense_DSM44202,"Catypicum_R2070","Caurimucosum_ATCC700975","Cbelfantii_FRC0043","Ccallunae_DSM20147","Ccamporealensis_DSM44610","Cdeserti_GIMN1010","Cdiphtheriae_NCTC11397","Cdoosanense_DSM45436","Cefficiens_YS314","Cepidermidicanis_DSM45586","Cfalsenii_DSM44353","Cglutamicum_ATCC13032","Cglycinophilum_AJ3170","Chalotolerans_YIM70093","Chumireducens_DSM45392","Cimitans_DSM44264","Cjeike…	0.192879	0.0819631	1.65609	0.148675	0.0819728	1.65614	2	1	1. 0.74882;2. 417;3. 1249;4. 443;5. 443;6. 1327;7. 463;8. 1387;9. 1219;10. A;11. GCT
ERS451417_00928	1717.62.peg.935	NA	NA	NA	0.7594	20	Caurimucosum_ATCC700975,"Cbelfantii_FRC0043","Ccamporealensis_DSM44610","Cdiphtheriae_NCTC11397","Cdoosanense_DSM45436","Chalotolerans_YIM70093","Chumireducens_DSM45392","Cmarinum_DSM44953","Cmaris_DSM45190","Cpseudotuberculosis_31","Cpseudotuberculosis_ATCC19410","Crouxii_FRC0190","Csilvaticum_KL0182","Csimulans_PES1","Csingulare_IBSB52218","Ctestudinoris_DSM44614","Culcerans_NCTC12077","Culcera…	50.5247	0.201474	1.5831	0.999991	0.201657	1.58238	3328	0
ERS451417_00210	1717.62.peg.207	NA	NA	NA	0.7803	6	Cbelfantii_FRC0043,"Cdiphtheriae_NCTC11397","Cmustelae_DSM45274","Cpseudotuberculosis_31","Cpseudotuberculosis_ATCC19410","Crouxii_FRC0190"	0.168806	0.118504	4.33361	0.139391	0.118559	4.33014	2	1	1. 0.71902;2. 93;3. 277;4. 96;5. 96;6. 286;7. 102;8. 304;9. 121;10. G;11. GGT
ERS451417_02262	1717.62.peg.2291	NA	NA	NA	0.7846	38	Cargentoratense_DSM44202,"Catypicum_R2070","Caurimucosum_ATCC700975","Cbelfantii_FRC0043","Ccallunae_DSM20147","Ccamporealensis_DSM44610","Cdeserti_GIMN1010","Cdiphtheriae_NCTC11397","Cdoosanense_DSM45436","Cefficiens_YS314","Cepidermidicanis_DSM45586","Cfalsenii_DSM44353","Cglutamicum_ATCC13032","Cglycinophilum_AJ3170","Chalotolerans_YIM70093","Chumireducens_DSM45392","Cimitans_DSM44264","Cjeike…	0.559565	0.160361	1.71785	0.326507	0.16038	1.71814	2	1	1. 0.81578;2. 68;3. 202;4. 86;5. 86;6. 256;7. 103;8. 307;9. 109;10. P;11. CCC
ERS451417_01223	1717.62.peg.1231	NA	NA	NA	0.7926	5	Ccallunae_DSM20147,"Cdiphtheriae_NCTC11397","Chalotolerans_YIM70093","Cpseudotuberculosis_ATCC19410","Crouxii_FRC0190"	237.476	0.403111	1.56231	1	0.404348	1.55687	4356	0
ERS451417_01398	1717.62.peg.1411	NA	NA	NA	0.8099	11	Cargentoratense_DSM44202,"Cbelfantii_FRC0043","Cdiphtheriae_NCTC11397","Cepidermidicanis_DSM45586","Cimitans_DSM44264","Cpseudotuberculosis_31","Cpseudotuberculosis_ATCC19410","Csilvaticum_KL0182","Culcerans_NCTC12077","Culcerans_NCTC7910","Cureicelerivorans_IMMIBRIV2301"	0.319345	0.319345	2.08183	0.996552	0.319319	2.08311	3330	0
ERS451417_01764	1717.62.peg.1766	NA	NA	NA	0.8111	13	Cbelfantii_FRC0043,"Cdiphtheriae_NCTC11397","Cglycinophilum_AJ3170","Chalotolerans_YIM70093","Ckutscheri_DSM20755","Cmustelae_DSM45274","Cpseudotuberculosis_31","Cpseudotuberculosis_ATCC19410","Csilvaticum_KL0182","Cterpenotabidum_Y11","Culcerans_NCTC12077","Culcerans_NCTC7910","Cvitaeruminis_DSM20294"	0.743257	0.253293	1.7785	0.999592	0.25347	1.77899	1026	1	1. 0.91633;2. 116;3. 346;4. 163;5. 137;6. 409;7. 170;8. 508;9. 277;10. R;11. CGG
ERS451417_02206	1717.62.peg.2231	NA	NA	NA	0.8161	9	Cbelfantii_FRC0043,"Cdiphtheriae_NCTC11397","Cmustelae_DSM45274","Cpseudotuberculosis_31","Cpseudotuberculosis_ATCC19410","Csilvaticum_KL0182","Culcerans_NCTC12077","Culcerans_NCTC7910","Cvitaeruminis_DSM20294"	0.351708	0.129389	2.56903	0.309976	0.129513	2.56892	2	2	1. 0.85144;2. 108;3. 322;4. 188;5. 165;6. 493;7. 195;8. 583;9. 262;10. I;11. ATT	1. 0.63621;2. 228;3. 682;4. 330;5. 295;6. 883;7. 325;8. 973;9. 616;10. P;11. CCT
ERS451417_01973	1717.62.peg.1973	NA	NA	NA	0.8239	38	Cargentoratense_DSM44202,"Catypicum_R2070","Caurimucosum_ATCC700975","Cbelfantii_FRC0043","Ccallunae_DSM20147","Ccamporealensis_DSM44610","Cdeserti_GIMN1010","Cdiphtheriae_NCTC11397","Cdoosanense_DSM45436","Cefficiens_YS314","Cepidermidicanis_DSM45586","Cfalsenii_DSM44353","Cglutamicum_ATCC13032","Cglycinophilum_AJ3170","Chalotolerans_YIM70093","Chumireducens_DSM45392","Cimitans_DSM44264","Cjeike…	0.239931	0.102269	1.92369	0.214183	0.10227	1.9236	2	1	1. 0.8376;2. 84;3. 250;4. 89;5. 89;6. 265;7. 99;8. 295;9. 148;10. A;11. GCC
ERS451417_00412	1717.62.peg.412	NA	NA	NA	0.8329	13	Catypicum_R2070,"Cbelfantii_FRC0043","Ccamporealensis_DSM44610","Cdiphtheriae_NCTC11397","Cepidermidicanis_DSM45586","Ckutscheri_DSM20755","Cpseudotuberculosis_31","Cpseudotuberculosis_ATCC19410","Crouxii_FRC0190","Csilvaticum_KL0182","Csimulans_PES1","Culcerans_NCTC12077","Culcerans_NCTC7910"	0.265753	0.180376	2.50813	0.245455	0.180423	2.50805	2050	1	1. 0.74429;2. 372;3. 1114;4. 406;5. 395;6. 1183;7. 454;8. 1360;9. 841;10. M;11. ATG
ERS451417_01578	1717.62.peg.1587	NA	NA	NA	0.8759	18	Cbelfantii_FRC0043,"Ccallunae_DSM20147","Cdeserti_GIMN1010","Cdiphtheriae_NCTC11397","Cdoosanense_DSM45436","Cefficiens_YS314","Cepidermidicanis_DSM45586","Cglutamicum_ATCC13032","Chumireducens_DSM45392","Cmarinum_DSM44953","Cmaris_DSM45190","Cmustelae_DSM45274","Cpseudotuberculosis_ATCC19410","Csilvaticum_KL0182","Ctestudinoris_DSM44614","Culcerans_NCTC12077","Culcerans_NCTC7910","Cvitaeruminis_…	0.240979	0.104956	1.60557	0.230565	0.104965	1.60561	6146	12	1. 0.67268;2. 14;3. 40;4. 64;5. 21;6. 61;7. 33;8. 97;9. 4;10. L;11. CTC	1. 0.66443;2. 26;3. 76;4. 76;5. 33;6. 97;7. 45;8. 133;9. 40;10. P;11. CCG	1. 0.57314;2. 43;3. 127;4. 93;5. 50;6. 148;7. 62;8. 184;9. 91;10. D;11. GAC	1. 0.51267;2. 45;3. 133;4. 95;5. 52;6. 154;7. 64;8. 190;9. 97;10. L;11. CTG	1. 0.62429;2. 53;3. 157;4. 103;5. 60;6. 178;7. 72;8. 214;9. 121;10. T;11. ACG	1. 0.70953;2. 129;3. 385;4. 187;5. 139;6. 415;7. 152;8. 454;9. 259;10. A;11. GCA	1. 0.50177;2. 132;3. 394;4. 190;5. 142;6. 424;7. 155;8. 463;9. 268;10. T;11. ACA	1. 0.78318;2. 133;3. 397;4. 191;5. 143;6. 427;7. 156;8. 466;9. 271;10. H;11. CAT	1. 0.54235;2. 134;3. 400;4. 192;5. 144;6. 430;7. 157;8. 469;9. 274;10. I;11. ATT	1. 0.5697;2. 150;3. 448;4. 208;5. 160;6. 478;7. 173;8. 517;9. 322;10. F;11. TTC	1. 0.6746;2. 168;3. 502;4. 226;5. 178;6. 532;7. 191;8. 571;9. 376;10. Q;11. CAA	1. 0.54035;2. 187;3. 559;4. 246;5. 197;6. 589;7. 210;8. 628;9. 433;10. E;11. GAA
ERS451417_01997	1717.62.peg.2001	NA	NA	NA	0.8968	7	Cbelfantii_FRC0043,"Cdiphtheriae_NCTC11397","Cpseudotuberculosis_31","Cpseudotuberculosis_ATCC19410","Csilvaticum_KL0182","Culcerans_NCTC12077","Culcerans_NCTC7910"	25.6083	0.26757	5.8451	1	0.267739	5.84427	256	0
ERS451417_01147	1717.62.peg.1158	NA	NA	NA	0.9151	39	Cargentoratense_DSM44202,"Catypicum_R2070","Caurimucosum_ATCC700975","Cbelfantii_FRC0043","Ccallunae_DSM20147","Ccamporealensis_DSM44610","Cdeserti_GIMN1010","Cdiphtheriae_NCTC11397","Cdoosanense_DSM45436","Cefficiens_YS314","Cepidermidicanis_DSM45586","Cfalsenii_DSM44353","Cglutamicum_ATCC13032","Cglycinophilum_AJ3170","Chalotolerans_YIM70093","Chumireducens_DSM45392","Cimitans_DSM44264","Cjeike…	0.204248	0.0744125	1.48503	0.192725	0.0744022	1.48504	2	2	1. 0.74851;2. 275;3. 823;4. 285;5. 285;6. 853;7. 294;8. 880;9. 760;10. P;11. CCA	1. 0.75806;2. 690;3. 2068;4. 743;5. 743;6. 2227;7. 1000;8. 2998;9. 1927;10. R;11. CGT
ERS451417_02263	1717.62.peg.2292	NA	NA	NA	0.9183	28	Caurimucosum_ATCC700975,"Cbelfantii_FRC0043","Ccallunae_DSM20147","Ccamporealensis_DSM44610","Cdeserti_GIMN1010","Cdiphtheriae_NCTC11397","Cdoosanense_DSM45436","Cefficiens_YS314","Cepidermidicanis_DSM45586","Cglutamicum_ATCC13032","Chalotolerans_YIM70093","Chumireducens_DSM45392","Cimitans_DSM44264","Ckutscheri_DSM20755","Cmarinum_DSM44953","Cmaris_DSM45190","Cmustelae_DSM45274","Cpseudotubercul…	0.498648	0.184445	1.60959	0.470974	0.184483	1.60956	1026	2	1. 0.86528;2. 188;3. 562;4. 240;5. 217;6. 649;7. 265;8. 793;9. 418;10. E;11. GAG	1. 0.85436;2. 194;3. 580;4. 246;5. 223;6. 667;7. 271;8. 811;9. 436;10. S;11. TCT
ERS451417_00873	1717.62.peg.879	NA	NA	NA	0.9544	8	Cbelfantii_FRC0043,"Cdiphtheriae_NCTC11397","Cpseudotuberculosis_31","Cpseudotuberculosis_ATCC19410","Crouxii_FRC0190","Csilvaticum_KL0182","Culcerans_NCTC12077","Culcerans_NCTC7910"	0.3193	0.0963821	2.56561	0.309406	0.0964204	2.5657	2	1	1. 0.85179;2. 454;3. 1360;4. 691;5. 490;6. 1468;7. 492;8. 1474;9. 1291;10. G;11. GGC
ERS451417_00549	1717.62.peg.553	NA	NA	NA	0.9627	12	Cargentoratense_DSM44202,"Cbelfantii_FRC0043","Cdiphtheriae_NCTC11397","Clactis_RW25","Cmustelae_DSM45274","Cpseudotuberculosis_ATCC19410","Crouxii_FRC0190","Csilvaticum_KL0182","Csimulans_PES1","Culcerans_NCTC12077","Culcerans_NCTC7910","Curealyticum_DSM7109"	0.567977	0.174073	2.22547	0.998563	0.173533	2.2245	4098	3	1. 0.80305;2. 7;3. 19;4. 13;5. 13;6. 37;7. 15;8. 43;9. 7;10. L;11. CTT	1. 0.76536;2. 27;3. 79;4. 33;5. 33;6. 97;7. 35;8. 103;9. 67;10. V;11. GTC	1. 0.59532;2. 68;3. 202;4. 83;5. 83;6. 247;7. 85;8. 253;9. 184;10. G;11. GGC
ERS451417_00099	1717.62.peg.97	NA	NA	NA	0.9777	28	Cargentoratense_DSM44202,"Caurimucosum_ATCC700975","Cbelfantii_FRC0043","Ccallunae_DSM20147","Ccamporealensis_DSM44610","Cdeserti_GIMN1010","Cdiphtheriae_NCTC11397","Cdoosanense_DSM45436","Cefficiens_YS314","Cepidermidicanis_DSM45586","Cglutamicum_ATCC13032","Chalotolerans_YIM70093","Chumireducens_DSM45392","Cimitans_DSM44264","Cmarinum_DSM44953","Cmaris_DSM45190","Cpseudotuberculosis_31","Cpseud…	0.211522	0.172148	1.63296	0.991788	0.172147	1.63296	3330	0
ERS451417_01294	1717.62.peg.1302	NA	NA	NA	0.9838	38	Cargentoratense_DSM44202,"Catypicum_R2070","Caurimucosum_ATCC700975","Cbelfantii_FRC0043","Ccallunae_DSM20147","Ccamporealensis_DSM44610","Cdeserti_GIMN1010","Cdiphtheriae_NCTC11397","Cdoosanense_DSM45436","Cefficiens_YS314","Cepidermidicanis_DSM45586","Cfalsenii_DSM44353","Cglutamicum_ATCC13032","Cglycinophilum_AJ3170","Chalotolerans_YIM70093","Chumireducens_DSM45392","Cimitans_DSM44264","Cjeike…	0.294617	0.182831	1.63915	0.290576	0.182831	1.63915	3074	1	1. 0.79445;2. 371;3. 1111;4. 407;5. 407;6. 1219;7. 493;8. 1477;9. 850;10. R;11. CGA
ERS451417_01303	1717.62.peg.1311	NA	NA	NA	0.9842	38	Cargentoratense_DSM44202,"Catypicum_R2070","Caurimucosum_ATCC700975","Cbelfantii_FRC0043","Ccallunae_DSM20147","Ccamporealensis_DSM44610","Cdeserti_GIMN1010","Cdiphtheriae_NCTC11397","Cdoosanense_DSM45436","Cefficiens_YS314","Cepidermidicanis_DSM45586","Cfalsenii_DSM44353","Cglutamicum_ATCC13032","Cglycinophilum_AJ3170","Chalotolerans_YIM70093","Chumireducens_DSM45392","Cimitans_DSM44264","Cjeike…	6.92722	0.228725	1.46957	0.307347	0.228724	1.46957	256	0
ERS451417_01184	1717.62.peg.1193	NA	NA	NA	0.9857	39	Cargentoratense_DSM44202,"Catypicum_R2070","Caurimucosum_ATCC700975","Cbelfantii_FRC0043","Ccallunae_DSM20147","Ccamporealensis_DSM44610","Cdeserti_GIMN1010","Cdiphtheriae_NCTC11397","Cdoosanense_DSM45436","Cefficiens_YS314","Cepidermidicanis_DSM45586","Cfalsenii_DSM44353","Cglutamicum_ATCC13032","Cglycinophilum_AJ3170","Chalotolerans_YIM70093","Chumireducens_DSM45392","Cimitans_DSM44264","Cjeike…	0.0981674	0.0981577	1.50781	0.205818	0.0981577	1.50781	258	0
ERS451417_01899	1717.62.peg.1896	NA	NA	NA	0.986	7	Cbelfantii_FRC0043,"Cdiphtheriae_NCTC11397","Cpseudotuberculosis_31","Cpseudotuberculosis_ATCC19410","Csilvaticum_KL0182","Culcerans_NCTC12077","Culcerans_NCTC7910"	0.0816302	0.0811468	3.41846	0.0811656	0.0811463	3.41848	2	1	1. 0.56407;2. 345;3. 1033;4. 361;5. 345;6. 1033;7. 345;8. 1033;9. 1033;10. E;11. GAG
ERS451417_00231	1717.62.peg.227	NA	NA	NA	0.9863	39	Cargentoratense_DSM44202,"Catypicum_R2070","Caurimucosum_ATCC700975","Cbelfantii_FRC0043","Ccallunae_DSM20147","Ccamporealensis_DSM44610","Cdeserti_GIMN1010","Cdiphtheriae_NCTC11397","Cdoosanense_DSM45436","Cefficiens_YS314","Cepidermidicanis_DSM45586","Cfalsenii_DSM44353","Cglutamicum_ATCC13032","Cglycinophilum_AJ3170","Chalotolerans_YIM70093","Chumireducens_DSM45392","Cimitans_DSM44264","Cjeike…	0.107582	0.0898792	2.10491	0.200103	0.089879	2.10491	258	0
ERS451417_01788	1717.62.peg.1793	NA	NA	NA	0.9872	31	Cargentoratense_DSM44202,"Catypicum_R2070","Caurimucosum_ATCC700975","Cbelfantii_FRC0043","Ccallunae_DSM20147","Ccamporealensis_DSM44610","Cdeserti_GIMN1010","Cdiphtheriae_NCTC11397","Cdoosanense_DSM45436","Cefficiens_YS314","Cepidermidicanis_DSM45586","Cglutamicum_ATCC13032","Chalotolerans_YIM70093","Chumireducens_DSM45392","Cimitans_DSM44264","Ckutscheri_DSM20755","Cmarinum_DSM44953","Cmaris_DS…	0.151333	0.151324	1.74737	0.268448	0.151334	1.74737	1282	0
ERS451417_00174	1717.62.peg.172	NA	NA	NA	0.9882	7	Cdiphtheriae_NCTC11397,"Ckutscheri_DSM20755","Cpseudotuberculosis_31","Cpseudotuberculosis_ATCC19410","Csilvaticum_KL0182","Culcerans_NCTC12077","Culcerans_NCTC7910"	0.16388	0.163695	2.89689	0.163705	0.163705	2.89685	2	1	1. 0.70523;2. 155;3. 463;4. 164;5. 164;6. 490;7. 168;8. 502;9. 442;10. G;11. GGT
ERS451417_01464	1717.62.peg.1474	NA	NA	NA	0.9885	9	Cbelfantii_FRC0043,"Cdiphtheriae_NCTC11397","Ckutscheri_DSM20755","Cmustelae_DSM45274","Cpseudotuberculosis_31","Cpseudotuberculosis_ATCC19410","Csilvaticum_KL0182","Culcerans_NCTC12077","Culcerans_NCTC7910"	14.6138	0.109613	2.08928	0.126229	0.109613	2.08928	256	0
ERS451417_02019	1717.62.peg.2024	NA	NA	NA	0.9894	38	Cargentoratense_DSM44202,"Catypicum_R2070","Caurimucosum_ATCC700975","Cbelfantii_FRC0043","Ccallunae_DSM20147","Ccamporealensis_DSM44610","Cdeserti_GIMN1010","Cdiphtheriae_NCTC11397","Cdoosanense_DSM45436","Cefficiens_YS314","Cepidermidicanis_DSM45586","Cfalsenii_DSM44353","Cglutamicum_ATCC13032","Cglycinophilum_AJ3170","Chalotolerans_YIM70093","Chumireducens_DSM45392","Cimitans_DSM44264","Cjeike…	5.54106	0.153108	1.88193	0.266486	0.153118	1.88193	256	0
ERS451417_00313	1717.62.peg.314	NA	NA	NA	0.9895	38	Catypicum_R2070,"Caurimucosum_ATCC700975","Cbelfantii_FRC0043","Ccallunae_DSM20147","Ccamporealensis_DSM44610","Cdeserti_GIMN1010","Cdiphtheriae_NCTC11397","Cdoosanense_DSM45436","Cefficiens_YS314","Cepidermidicanis_DSM45586","Cfalsenii_DSM44353","Cglutamicum_ATCC13032","Cglycinophilum_AJ3170","Chalotolerans_YIM70093","Chumireducens_DSM45392","Cimitans_DSM44264","Cjeikeium_K41","Ckroppenstedtii_D…	0.1501	0.126792	2.10056	0.245959	0.126792	2.10058	258	0
ERS451417_01611	1717.62.peg.1620	NA	NA	NA	0.9895	38	Cargentoratense_DSM44202,"Catypicum_R2070","Caurimucosum_ATCC700975","Cbelfantii_FRC0043","Ccallunae_DSM20147","Ccamporealensis_DSM44610","Cdeserti_GIMN1010","Cdiphtheriae_NCTC11397","Cdoosanense_DSM45436","Cefficiens_YS314","Cepidermidicanis_DSM45586","Cfalsenii_DSM44353","Cglutamicum_ATCC13032","Cglycinophilum_AJ3170","Chalotolerans_YIM70093","Chumireducens_DSM45392","Cimitans_DSM44264","Cjeike…	0.165545	0.165545	1.71268	0.165545	0.165545	1.71266	258	0
ERS451417_01367	1717.62.peg.1376	NA	NA	NA	0.9898	38	Cargentoratense_DSM44202,"Catypicum_R2070","Caurimucosum_ATCC700975","Cbelfantii_FRC0043","Ccallunae_DSM20147","Ccamporealensis_DSM44610","Cdeserti_GIMN1010","Cdiphtheriae_NCTC11397","Cdoosanense_DSM45436","Cefficiens_YS314","Cepidermidicanis_DSM45586","Cfalsenii_DSM44353","Cglutamicum_ATCC13032","Cglycinophilum_AJ3170","Chalotolerans_YIM70093","Chumireducens_DSM45392","Cimitans_DSM44264","Cjeike…	0.0878619	0.0878619	1.65245	0.0878619	0.0878619	1.65242	258	0
ERS451417_01043	1717.62.peg.1053	NA	NA	NA	0.9898	39	Cargentoratense_DSM44202,"Catypicum_R2070","Caurimucosum_ATCC700975","Cbelfantii_FRC0043","Ccallunae_DSM20147","Ccamporealensis_DSM44610","Cdeserti_GIMN1010","Cdiphtheriae_NCTC11397","Cdoosanense_DSM45436","Cefficiens_YS314","Cepidermidicanis_DSM45586","Cfalsenii_DSM44353","Cglutamicum_ATCC13032","Cglycinophilum_AJ3170","Chalotolerans_YIM70093","Chumireducens_DSM45392","Cimitans_DSM44264","Cjeike…	0.232227	0.147755	1.47934	0.425522	0.147745	1.47934	258	0
ERS451417_01404	1717.62.peg.1417	NA	NA	NA	0.99	38	Cargentoratense_DSM44202,"Catypicum_R2070","Caurimucosum_ATCC700975","Cbelfantii_FRC0043","Ccallunae_DSM20147","Ccamporealensis_DSM44610","Cdeserti_GIMN1010","Cdiphtheriae_NCTC11397","Cdoosanense_DSM45436","Cefficiens_YS314","Cepidermidicanis_DSM45586","Cfalsenii_DSM44353","Cglutamicum_ATCC13032","Cglycinophilum_AJ3170","Chalotolerans_YIM70093","Chumireducens_DSM45392","Cimitans_DSM44264","Cjeike…	0.145051	0.145051	1.59967	0.145061	0.145051	1.59968	2	1	1. 0.43517;2. 237;3. 709;4. 248;5. 248;6. 742;7. 377;8. 1129;9. 484;10. G;11. GGT
ERS451417_00179	1717.62.peg.175	NA	NA	NA	0.9904	39	Cargentoratense_DSM44202,"Catypicum_R2070","Caurimucosum_ATCC700975","Cbelfantii_FRC0043","Ccallunae_DSM20147","Ccamporealensis_DSM44610","Cdeserti_GIMN1010","Cdiphtheriae_NCTC11397","Cdoosanense_DSM45436","Cefficiens_YS314","Cepidermidicanis_DSM45586","Cfalsenii_DSM44353","Cglutamicum_ATCC13032","Cglycinophilum_AJ3170","Chalotolerans_YIM70093","Chumireducens_DSM45392","Cimitans_DSM44264","Cjeike…	0.230152	0.230152	1.61502	0.230161	0.230152	1.61502	2	1	1. 0.67398;2. 205;3. 613;4. 245;5. 245;6. 733;7. 261;8. 781;9. 538;10. S;11. TCT
ERS451417_01807	1717.62.peg.1813	NA	NA	NA	0.9913	38	Cargentoratense_DSM44202,"Catypicum_R2070","Caurimucosum_ATCC700975","Cbelfantii_FRC0043","Ccallunae_DSM20147","Ccamporealensis_DSM44610","Cdeserti_GIMN1010","Cdiphtheriae_NCTC11397","Cdoosanense_DSM45436","Cefficiens_YS314","Cepidermidicanis_DSM45586","Cfalsenii_DSM44353","Cglutamicum_ATCC13032","Cglycinophilum_AJ3170","Chalotolerans_YIM70093","Chumireducens_DSM45392","Cimitans_DSM44264","Cjeike…	0.12951	0.0802115	1.59019	0.173109	0.0802117	1.5902	258	0
ERS451417_01180	1717.62.peg.1189	NA	NA	NA	0.9914	39	Cargentoratense_DSM44202,"Catypicum_R2070","Caurimucosum_ATCC700975","Cbelfantii_FRC0043","Ccallunae_DSM20147","Ccamporealensis_DSM44610","Cdeserti_GIMN1010","Cdiphtheriae_NCTC11397","Cdoosanense_DSM45436","Cefficiens_YS314","Cepidermidicanis_DSM45586","Cfalsenii_DSM44353","Cglutamicum_ATCC13032","Cglycinophilum_AJ3170","Chalotolerans_YIM70093","Chumireducens_DSM45392","Cimitans_DSM44264","Cjeike…	0.221515	0.221505	1.71899	0.261066	0.221505	1.71899	2306	0
ERS451417_01520	1717.62.peg.1529	NA	NA	NA	0.9914	15	Cargentoratense_DSM44202,"Cbelfantii_FRC0043","Cdiphtheriae_NCTC11397","Cefficiens_YS314","Cepidermidicanis_DSM45586","Ckroppenstedtii_DSM44385","Ckutscheri_DSM20755","Clactis_RW25","Cmustelae_DSM45274","Cpseudotuberculosis_31","Cpseudotuberculosis_ATCC19410","Csilvaticum_KL0182","Culcerans_NCTC12077","Culcerans_NCTC7910","Cvitaeruminis_DSM20294"	0.211458	0.211458	2.23113	0.211487	0.211458	2.23113	3074	1	1. 0.62074;2. 312;3. 934;4. 360;5. 360;6. 1078;7. 370;8. 1108;9. 775;10. A;11. GCC
ERS451417_02354	1717.62.peg.2382	NA	NA	NA	0.9915	24	Catypicum_R2070,"Caurimucosum_ATCC700975","Cbelfantii_FRC0043","Ccamporealensis_DSM44610","Cdiphtheriae_NCTC11397","Cdoosanense_DSM45436","Cglycinophilum_AJ3170","Chalotolerans_YIM70093","Chumireducens_DSM45392","Cimitans_DSM44264","Cmarinum_DSM44953","Cmaris_DSM45190","Cmustelae_DSM45274","Cpseudotuberculosis_31","Cpseudotuberculosis_ATCC19410","CriegeliiPUDD83A45","Csilvaticum_KL0182","Csimulan…	15.8004	0.148154	2.33014	0.419662	0.148154	2.33015	1280	0
ERS451417_01550	1717.62.peg.1559	NA	NA	NA	0.9916	31	Cargentoratense_DSM44202,"Catypicum_R2070","Caurimucosum_ATCC700975","Cbelfantii_FRC0043","Ccallunae_DSM20147","Ccamporealensis_DSM44610","Cdeserti_GIMN1010","Cdiphtheriae_NCTC11397","Cdoosanense_DSM45436","Cefficiens_YS314","Cepidermidicanis_DSM45586","Cglutamicum_ATCC13032","Chalotolerans_YIM70093","Chumireducens_DSM45392","Cimitans_DSM44264","Cjeikeium_K41","Ckroppenstedtii_DSM44385","Ckutsche…	2.54432	0.147002	2.17801	0.253544	0.147002	2.17801	256	0
ERS451417_00960	1717.62.peg.967	NA	NA	NA	0.9922	39	Cargentoratense_DSM44202,"Catypicum_R2070","Caurimucosum_ATCC700975","Cbelfantii_FRC0043","Ccallunae_DSM20147","Ccamporealensis_DSM44610","Cdeserti_GIMN1010","Cdiphtheriae_NCTC11397","Cdoosanense_DSM45436","Cefficiens_YS314","Cepidermidicanis_DSM45586","Cfalsenii_DSM44353","Cglutamicum_ATCC13032","Cglycinophilum_AJ3170","Chalotolerans_YIM70093","Chumireducens_DSM45392","Cimitans_DSM44264","Cjeike…	0.568529	0.156421	1.70632	0.298267	0.156421	1.70632	258	0
ERS451417_00048	1717.62.peg.44	NA	NA	NA	0.9923	35	Cargentoratense_DSM44202,"Catypicum_R2070","Caurimucosum_ATCC700975","Cbelfantii_FRC0043","Ccamporealensis_DSM44610","Cdeserti_GIMN1010","Cdiphtheriae_NCTC11397","Cdoosanense_DSM45436","Cefficiens_YS314","Cfalsenii_DSM44353","Cglycinophilum_AJ3170","Chalotolerans_YIM70093","Chumireducens_DSM45392","Cimitans_DSM44264","Cjeikeium_K41","Ckroppenstedtii_DSM44385","Clactis_RW25","Cmarinum_DSM44953","C…	4.39665	0.114495	1.9175	0.224882	0.114495	1.9175	3328	0
ERS451417_01867	1717.62.peg.1869	NA	NA	NA	0.9923	38	Cargentoratense_DSM44202,"Catypicum_R2070","Caurimucosum_ATCC700975","Cbelfantii_FRC0043","Ccallunae_DSM20147","Ccamporealensis_DSM44610","Cdeserti_GIMN1010","Cdiphtheriae_NCTC11397","Cdoosanense_DSM45436","Cefficiens_YS314","Cepidermidicanis_DSM45586","Cfalsenii_DSM44353","Cglutamicum_ATCC13032","Cglycinophilum_AJ3170","Chalotolerans_YIM70093","Chumireducens_DSM45392","Cimitans_DSM44264","Cjeike…	0.145548	0.145548	1.67188	0.145548	0.145548	1.67188	258	0
ERS451417_00028	1717.62.peg.25	NA	NA	NA	0.9925	8	Cbelfantii_FRC0043,"Cdiphtheriae_NCTC11397","Cpseudotuberculosis_31","Cpseudotuberculosis_ATCC19410","Crouxii_FRC0190","Csilvaticum_KL0182","Culcerans_NCTC12077","Culcerans_NCTC7910"	99.7829	0.148638	3.37214	0.155378	0.148647	3.37214	256	0
ERS451417_00246	1717.62.peg.241	NA	NA	NA	0.9927	13	Cbelfantii_FRC0043,"Cdiphtheriae_NCTC11397","Cimitans_DSM44264","Cmarinum_DSM44953","Cmustelae_DSM45274","Cpseudotuberculosis_31","Cpseudotuberculosis_ATCC19410","CriegeliiPUDD83A45","Crouxii_FRC0190","Culcerans_NCTC12077","Culcerans_NCTC7910","Cureicelerivorans_IMMIBRIV2301","Cuterequi_DSM45634"	28.4504	0.362343	1.92988	0.471383	0.362343	1.92988	256	0
ERS451417_01416	1717.62.peg.1422	NA	NA	NA	0.9934	35	Cargentoratense_DSM44202,"Catypicum_R2070","Caurimucosum_ATCC700975","Cbelfantii_FRC0043","Ccallunae_DSM20147","Ccamporealensis_DSM44610","Cdeserti_GIMN1010","Cdiphtheriae_NCTC11397","Cdoosanense_DSM45436","Cefficiens_YS314","Cepidermidicanis_DSM45586","Cfalsenii_DSM44353","Cglutamicum_ATCC13032","Cglycinophilum_AJ3170","Chalotolerans_YIM70093","Cimitans_DSM44264","Cjeikeium_K41","Ckroppenstedtii…	0.104831	0.104812	1.45948	0.213075	0.104812	1.45948	1282	0
ERS451417_01856	1717.62.peg.1858	NA	NA	NA	0.9936	33	Cargentoratense_DSM44202,"Catypicum_R2070","Caurimucosum_ATCC700975","Cbelfantii_FRC0043","Ccallunae_DSM20147","Ccamporealensis_DSM44610","Cdeserti_GIMN1010","Cdiphtheriae_NCTC11397","Cdoosanense_DSM45436","Cefficiens_YS314","Cepidermidicanis_DSM45586","Cfalsenii_DSM44353","Cglutamicum_ATCC13032","Chalotolerans_YIM70093","Chumireducens_DSM45392","Cimitans_DSM44264","Cjeikeium_K41","Ckroppenstedti…	0.104668	0.104658	1.27093	0.205389	0.104658	1.27093	3330	0
ERS451417_00094	1717.62.peg.92	NA	NA	NA	0.9938	11	Cbelfantii_FRC0043,"Cdiphtheriae_NCTC11397","Ckutscheri_DSM20755","Cmustelae_DSM45274","Cpseudotuberculosis_31","Cpseudotuberculosis_ATCC19410","Crouxii_FRC0190","Csilvaticum_KL0182","Culcerans_NCTC12077","Culcerans_NCTC7910","Cvitaeruminis_DSM20294"	0.200429	0.134315	2.85696	0.19997	0.134314	2.85691	2050	3	1. 0.80457;2. 105;3. 313;4. 121;5. 120;6. 358;7. 120;8. 358;9. 217;10. Y;11. TAC	1. 0.60475;2. 136;3. 406;4. 152;5. 151;6. 451;7. 151;8. 451;9. 310;10. A;11. GCC	1. 0.52285;2. 158;3. 472;4. 174;5. 173;6. 517;7. 173;8. 517;9. 376;10. R;11. CGA
ERS451417_02059	1717.62.peg.2071	NA	NA	NA	0.9938	38	Cargentoratense_DSM44202,"Catypicum_R2070","Caurimucosum_ATCC700975","Cbelfantii_FRC0043","Ccallunae_DSM20147","Ccamporealensis_DSM44610","Cdeserti_GIMN1010","Cdiphtheriae_NCTC11397","Cdoosanense_DSM45436","Cefficiens_YS314","Cepidermidicanis_DSM45586","Cfalsenii_DSM44353","Cglutamicum_ATCC13032","Cglycinophilum_AJ3170","Chalotolerans_YIM70093","Chumireducens_DSM45392","Cimitans_DSM44264","Cjeike…	0.175681	0.175681	1.95789	0.175681	0.175681	1.95791	2	1	1. 0.57044;2. 256;3. 766;4. 280;5. 280;6. 838;7. 313;8. 937;9. 682;10. P;11. CCA
ERS451417_00295	1717.62.peg.296	NA	NA	NA	0.994	39	Cargentoratense_DSM44202,"Catypicum_R2070","Caurimucosum_ATCC700975","Cbelfantii_FRC0043","Ccallunae_DSM20147","Ccamporealensis_DSM44610","Cdeserti_GIMN1010","Cdiphtheriae_NCTC11397","Cdoosanense_DSM45436","Cefficiens_YS314","Cepidermidicanis_DSM45586","Cfalsenii_DSM44353","Cglutamicum_ATCC13032","Cglycinophilum_AJ3170","Chalotolerans_YIM70093","Chumireducens_DSM45392","Cimitans_DSM44264","Cjeike…	0.152657	0.152657	1.6924	0.152657	0.152657	1.6924	258	0
ERS451417_01196	1717.62.peg.1205	NA	NA	NA	0.9942	12	Caurimucosum_ATCC700975,"Ccamporealensis_DSM44610","Cdiphtheriae_NCTC11397","Cepidermidicanis_DSM45586","Cpseudotuberculosis_31","Cpseudotuberculosis_ATCC19410","Crouxii_FRC0190","Csilvaticum_KL0182","Csimulans_PES1","Csingulare_IBSB52218","Culcerans_NCTC12077","Culcerans_NCTC7910"	0.114294	0.114294	2.8649	0.114293	0.114293	2.86489	258	0
ERS451417_01655	1717.62.peg.1662	NA	NA	NA	0.9945	38	Cargentoratense_DSM44202,"Catypicum_R2070","Caurimucosum_ATCC700975","Cbelfantii_FRC0043","Ccallunae_DSM20147","Ccamporealensis_DSM44610","Cdeserti_GIMN1010","Cdiphtheriae_NCTC11397","Cdoosanense_DSM45436","Cefficiens_YS314","Cepidermidicanis_DSM45586","Cfalsenii_DSM44353","Cglutamicum_ATCC13032","Cglycinophilum_AJ3170","Chalotolerans_YIM70093","Chumireducens_DSM45392","Cimitans_DSM44264","Cjeike…	0.475341	0.141697	1.71533	0.256171	0.141687	1.71533	258	0
ERS451417_00891	1717.62.peg.897	NA	NA	NA	0.9946	38	Cargentoratense_DSM44202,"Catypicum_R2070","Caurimucosum_ATCC700975","Cbelfantii_FRC0043","Ccallunae_DSM20147","Ccamporealensis_DSM44610","Cdeserti_GIMN1010","Cdiphtheriae_NCTC11397","Cdoosanense_DSM45436","Cefficiens_YS314","Cepidermidicanis_DSM45586","Cfalsenii_DSM44353","Cglutamicum_ATCC13032","Cglycinophilum_AJ3170","Chalotolerans_YIM70093","Chumireducens_DSM45392","Cimitans_DSM44264","Cjeike…	0.270325	0.217167	1.97147	0.346699	0.217176	1.97147	2306	0
ERS451417_00815	1717.62.peg.821	NA	NA	NA	0.9953	31	Catypicum_R2070,"Caurimucosum_ATCC700975","Cbelfantii_FRC0043","Ccallunae_DSM20147","Ccamporealensis_DSM44610","Cdeserti_GIMN1010","Cdiphtheriae_NCTC11397","Cefficiens_YS314","Cepidermidicanis_DSM45586","Cfalsenii_DSM44353","Cglutamicum_ATCC13032","Cglycinophilum_AJ3170","Chalotolerans_YIM70093","Chumireducens_DSM45392","Cimitans_DSM44264","Cjeikeium_K41","Cmarinum_DSM44953","Cmustelae_DSM45274",…	0.129117	0.129117	1.92415	0.129127	0.129117	1.92413	3330	0
ERS451417_00481	1717.62.peg.484	NA	NA	NA	0.9955	39	Cargentoratense_DSM44202,"Catypicum_R2070","Caurimucosum_ATCC700975","Cbelfantii_FRC0043","Ccallunae_DSM20147","Ccamporealensis_DSM44610","Cdeserti_GIMN1010","Cdiphtheriae_NCTC11397","Cdoosanense_DSM45436","Cefficiens_YS314","Cepidermidicanis_DSM45586","Cfalsenii_DSM44353","Cglutamicum_ATCC13032","Cglycinophilum_AJ3170","Chalotolerans_YIM70093","Chumireducens_DSM45392","Cimitans_DSM44264","Cjeike…	0.367023	0.0879588	2.01101	0.190934	0.0879688	2.01101	258	0
ERS451417_02397	1717.62.peg.2429	NA	NA	NA	0.9955	38	Cargentoratense_DSM44202,"Catypicum_R2070","Caurimucosum_ATCC700975","Cbelfantii_FRC0043","Ccallunae_DSM20147","Ccamporealensis_DSM44610","Cdeserti_GIMN1010","Cdiphtheriae_NCTC11397","Cdoosanense_DSM45436","Cefficiens_YS314","Cepidermidicanis_DSM45586","Cfalsenii_DSM44353","Cglutamicum_ATCC13032","Cglycinophilum_AJ3170","Chalotolerans_YIM70093","Chumireducens_DSM45392","Cimitans_DSM44264","Cjeike…	0.224345	0.045622	1.49257	0.103526	0.045622	1.49257	258	0
ERS451417_00069	1717.62.peg.65	NA	NA	NA	0.9956	23	Cargentoratense_DSM44202,"Cbelfantii_FRC0043","Ccallunae_DSM20147","Cdiphtheriae_NCTC11397","Cdoosanense_DSM45436","Cefficiens_YS314","Cfalsenii_DSM44353","Chalotolerans_YIM70093","Chumireducens_DSM45392","Ckroppenstedtii_DSM44385","Ckutscheri_DSM20755","Clactis_RW25","Cmarinum_DSM44953","Cmaris_DSM45190","Cmustelae_DSM45274","Cpseudotuberculosis_31","Cpseudotuberculosis_ATCC19410","Crouxii_FRC01…	0.297792	0.297792	1.66965	0.297802	0.297793	1.66965	3330	0
ERS451417_00397	1717.62.peg.397	NA	NA	NA	0.9956	39	Cargentoratense_DSM44202,"Catypicum_R2070","Caurimucosum_ATCC700975","Cbelfantii_FRC0043","Ccallunae_DSM20147","Ccamporealensis_DSM44610","Cdeserti_GIMN1010","Cdiphtheriae_NCTC11397","Cdoosanense_DSM45436","Cefficiens_YS314","Cepidermidicanis_DSM45586","Cfalsenii_DSM44353","Cglutamicum_ATCC13032","Cglycinophilum_AJ3170","Chalotolerans_YIM70093","Chumireducens_DSM45392","Cimitans_DSM44264","Cjeike…	0.504631	0.15823	1.64249	0.275538	0.15823	1.64249	258	0
ERS451417_01600	1717.62.peg.1609	NA	NA	NA	0.9956	35	Cargentoratense_DSM44202,"Catypicum_R2070","Caurimucosum_ATCC700975","Cbelfantii_FRC0043","Ccallunae_DSM20147","Ccamporealensis_DSM44610","Cdeserti_GIMN1010","Cdiphtheriae_NCTC11397","Cdoosanense_DSM45436","Cefficiens_YS314","Cepidermidicanis_DSM45586","Cglutamicum_ATCC13032","Cglycinophilum_AJ3170","Chalotolerans_YIM70093","Chumireducens_DSM45392","Cimitans_DSM44264","Cjeikeium_K41","Ckutscheri_…	0.247465	0.247465	1.74056	0.268787	0.247465	1.74057	3330	0
ERS451417_00494	1717.62.peg.497	NA	NA	NA	0.9958	38	Cargentoratense_DSM44202,"Catypicum_R2070","Caurimucosum_ATCC700975","Cbelfantii_FRC0043","Ccallunae_DSM20147","Ccamporealensis_DSM44610","Cdeserti_GIMN1010","Cdiphtheriae_NCTC11397","Cdoosanense_DSM45436","Cefficiens_YS314","Cepidermidicanis_DSM45586","Cfalsenii_DSM44353","Cglutamicum_ATCC13032","Cglycinophilum_AJ3170","Chalotolerans_YIM70093","Chumireducens_DSM45392","Cimitans_DSM44264","Cjeike…	0.791119	0.311512	1.26425	0.435319	0.311523	1.26425	258	0
ERS451417_01744	1717.62.peg.1747	NA	NA	NA	0.9958	7	Cbelfantii_FRC0043,"Cdiphtheriae_NCTC11397","Cpseudotuberculosis_31","Cpseudotuberculosis_ATCC19410","Csilvaticum_KL0182","Culcerans_NCTC12077","Culcerans_NCTC7910"	11.104	0.245058	3.57708	0.494949	0.245066	3.57706	256	0
ERS451417_01152	1717.62.peg.1163	NA	NA	NA	0.9958	39	Cargentoratense_DSM44202,"Catypicum_R2070","Caurimucosum_ATCC700975","Cbelfantii_FRC0043","Ccallunae_DSM20147","Ccamporealensis_DSM44610","Cdeserti_GIMN1010","Cdiphtheriae_NCTC11397","Cdoosanense_DSM45436","Cefficiens_YS314","Cepidermidicanis_DSM45586","Cfalsenii_DSM44353","Cglutamicum_ATCC13032","Cglycinophilum_AJ3170","Chalotolerans_YIM70093","Chumireducens_DSM45392","Cimitans_DSM44264","Cjeike…	0.113391	0.113391	1.56979	0.113391	0.113391	1.56979	258	0
1717.62.peg.244	1717.62.peg.244	NA	NA	NA	0.9961	39	Cargentoratense_DSM44202,"Catypicum_R2070","Caurimucosum_ATCC700975","Cbelfantii_FRC0043","Ccallunae_DSM20147","Ccamporealensis_DSM44610","Cdeserti_GIMN1010","Cdiphtheriae_NCTC11397","Cdoosanense_DSM45436","Cefficiens_YS314","Cepidermidicanis_DSM45586","Cfalsenii_DSM44353","Cglutamicum_ATCC13032","Cglycinophilum_AJ3170","Chalotolerans_YIM70093","Chumireducens_DSM45392","Cimitans_DSM44264","Cjeike…	0.528686	0.15599	1.47383	0.281124	0.15599	1.47382	258	0
ERS451417_01780	1717.62.peg.1784	NA	NA	NA	0.9961	38	Cargentoratense_DSM44202,"Catypicum_R2070","Caurimucosum_ATCC700975","Cbelfantii_FRC0043","Ccallunae_DSM20147","Ccamporealensis_DSM44610","Cdeserti_GIMN1010","Cdiphtheriae_NCTC11397","Cdoosanense_DSM45436","Cefficiens_YS314","Cepidermidicanis_DSM45586","Cfalsenii_DSM44353","Cglutamicum_ATCC13032","Cglycinophilum_AJ3170","Chalotolerans_YIM70093","Chumireducens_DSM45392","Cimitans_DSM44264","Cjeike…	0.078564	0.078564	1.99561	0.078564	0.078564	1.9956	258	0
ERS451417_01305	1717.62.peg.1313	NA	NA	NA	0.9961	28	Cargentoratense_DSM44202,"Caurimucosum_ATCC700975","Cbelfantii_FRC0043","Ccallunae_DSM20147","Cdeserti_GIMN1010","Cdiphtheriae_NCTC11397","Cdoosanense_DSM45436","Cefficiens_YS314","Cepidermidicanis_DSM45586","Cfalsenii_DSM44353","Cglutamicum_ATCC13032","Chalotolerans_YIM70093","Chumireducens_DSM45392","Cjeikeium_K41","Clactis_RW25","Cmarinum_DSM44953","Cmaris_DSM45190","Cmustelae_DSM45274","Cpseu…	0.465881	0.189563	1.6528	0.262653	0.189563	1.6528	3330	0
ERS451417_01507	1717.62.peg.1515	NA	NA	NA	0.9963	38	Cargentoratense_DSM44202,"Catypicum_R2070","Caurimucosum_ATCC700975","Cbelfantii_FRC0043","Ccallunae_DSM20147","Ccamporealensis_DSM44610","Cdeserti_GIMN1010","Cdiphtheriae_NCTC11397","Cdoosanense_DSM45436","Cefficiens_YS314","Cepidermidicanis_DSM45586","Cfalsenii_DSM44353","Cglutamicum_ATCC13032","Cglycinophilum_AJ3170","Chalotolerans_YIM70093","Chumireducens_DSM45392","Cimitans_DSM44264","Cjeike…	0.145778	0.145778	1.71931	0.145778	0.145778	1.7193	2050	1	1. 0.61173;2. 311;3. 931;4. 331;5. 331;6. 991;7. 354;8. 1060;9. 586;10. L;11. TTA
ERS451417_02133	1717.62.peg.2153	NA	NA	NA	0.9963	27	Catypicum_R2070,"Caurimucosum_ATCC700975","Cbelfantii_FRC0043","Ccamporealensis_DSM44610","Cdeserti_GIMN1010","Cdiphtheriae_NCTC11397","Cdoosanense_DSM45436","Cfalsenii_DSM44353","Cglutamicum_ATCC13032","Cglycinophilum_AJ3170","Chalotolerans_YIM70093","Chumireducens_DSM45392","Cimitans_DSM44264","Cjeikeium_K41","Clactis_RW25","Cmarinum_DSM44953","Cmaris_DSM45190","Cpseudotuberculosis_31","Cpseudo…	0.18856	0.18856	1.75973	0.18856	0.18856	1.75973	258	0
ERS451417_01333	1717.62.peg.1341	NA	NA	NA	0.9964	38	Cargentoratense_DSM44202,"Catypicum_R2070","Caurimucosum_ATCC700975","Cbelfantii_FRC0043","Ccallunae_DSM20147","Ccamporealensis_DSM44610","Cdeserti_GIMN1010","Cdiphtheriae_NCTC11397","Cdoosanense_DSM45436","Cefficiens_YS314","Cepidermidicanis_DSM45586","Cfalsenii_DSM44353","Cglutamicum_ATCC13032","Cglycinophilum_AJ3170","Chalotolerans_YIM70093","Chumireducens_DSM45392","Cimitans_DSM44264","Cjeike…	0.132767	0.132767	1.79503	0.132767	0.132767	1.79501	1282	0
ERS451417_00962	1717.62.peg.969	NA	NA	NA	0.9964	39	Cargentoratense_DSM44202,"Catypicum_R2070","Caurimucosum_ATCC700975","Cbelfantii_FRC0043","Ccallunae_DSM20147","Ccamporealensis_DSM44610","Cdeserti_GIMN1010","Cdiphtheriae_NCTC11397","Cdoosanense_DSM45436","Cefficiens_YS314","Cepidermidicanis_DSM45586","Cfalsenii_DSM44353","Cglutamicum_ATCC13032","Cglycinophilum_AJ3170","Chalotolerans_YIM70093","Chumireducens_DSM45392","Cimitans_DSM44264","Cjeike…	0.303124	0.0783787	2.05642	0.184586	0.0783785	2.05642	258	0
ERS451417_02069	1717.62.peg.2081	NA	NA	NA	0.9966	21	Cbelfantii_FRC0043,"Ccallunae_DSM20147","Cdiphtheriae_NCTC11397","Cdoosanense_DSM45436","Cglutamicum_ATCC13032","Chalotolerans_YIM70093","Cimitans_DSM44264","Ckutscheri_DSM20755","Cmarinum_DSM44953","Cmaris_DSM45190","Cpseudotuberculosis_31","Cpseudotuberculosis_ATCC19410","CriegeliiPUDD83A45","Csilvaticum_KL0182","Csimulans_PES1","Ctestudinoris_DSM44614","Culcerans_NCTC12077","Culcerans_NCTC7910…	0.0828874	0.0828874	1.43245	0.0828869	0.0828869	1.43245	258	0
ERS451417_01722	1717.62.peg.1725	NA	NA	NA	0.9966	10	Cbelfantii_FRC0043,"Cdiphtheriae_NCTC11397","Ckutscheri_DSM20755","Cmustelae_DSM45274","Cpseudotuberculosis_31","Cpseudotuberculosis_ATCC19410","Csilvaticum_KL0182","Culcerans_NCTC12077","Culcerans_NCTC7910","Cvitaeruminis_DSM20294"	0.18654	0.18654	2.42749	0.186549	0.18654	2.42749	2306	0
ERS451417_00983	1717.62.peg.994	NA	NA	NA	0.9966	39	Cargentoratense_DSM44202,"Catypicum_R2070","Caurimucosum_ATCC700975","Cbelfantii_FRC0043","Ccallunae_DSM20147","Ccamporealensis_DSM44610","Cdeserti_GIMN1010","Cdiphtheriae_NCTC11397","Cdoosanense_DSM45436","Cefficiens_YS314","Cepidermidicanis_DSM45586","Cfalsenii_DSM44353","Cglutamicum_ATCC13032","Cglycinophilum_AJ3170","Chalotolerans_YIM70093","Chumireducens_DSM45392","Cimitans_DSM44264","Cjeike…	0.156488	0.156352	1.84752	0.161455	0.156352	1.84752	3330	0
ERS451417_00358	1717.62.peg.357	NA	NA	NA	0.9966	39	Cargentoratense_DSM44202,"Catypicum_R2070","Caurimucosum_ATCC700975","Cbelfantii_FRC0043","Ccallunae_DSM20147","Ccamporealensis_DSM44610","Cdeserti_GIMN1010","Cdiphtheriae_NCTC11397","Cdoosanense_DSM45436","Cefficiens_YS314","Cepidermidicanis_DSM45586","Cfalsenii_DSM44353","Cglutamicum_ATCC13032","Cglycinophilum_AJ3170","Chalotolerans_YIM70093","Chumireducens_DSM45392","Cimitans_DSM44264","Cjeike…	0.495357	0.185403	1.87576	0.316548	0.185393	1.87576	258	0
ERS451417_00391	1717.62.peg.391	NA	NA	NA	0.9966	39	Cargentoratense_DSM44202,"Catypicum_R2070","Caurimucosum_ATCC700975","Cbelfantii_FRC0043","Ccallunae_DSM20147","Ccamporealensis_DSM44610","Cdeserti_GIMN1010","Cdiphtheriae_NCTC11397","Cdoosanense_DSM45436","Cefficiens_YS314","Cepidermidicanis_DSM45586","Cfalsenii_DSM44353","Cglutamicum_ATCC13032","Cglycinophilum_AJ3170","Chalotolerans_YIM70093","Chumireducens_DSM45392","Cimitans_DSM44264","Cjeike…	0.358529	0.0971543	1.7025	0.198179	0.0971639	1.7025	258	0
ERS451417_01542	1717.62.peg.1551	NA	NA	NA	0.9966	38	Cargentoratense_DSM44202,"Catypicum_R2070","Caurimucosum_ATCC700975","Cbelfantii_FRC0043","Ccallunae_DSM20147","Ccamporealensis_DSM44610","Cdeserti_GIMN1010","Cdiphtheriae_NCTC11397","Cdoosanense_DSM45436","Cefficiens_YS314","Cepidermidicanis_DSM45586","Cfalsenii_DSM44353","Cglutamicum_ATCC13032","Cglycinophilum_AJ3170","Chalotolerans_YIM70093","Chumireducens_DSM45392","Cimitans_DSM44264","Cjeike…	0.575704	0.203322	2.16416	0.33459	0.203312	2.16415	258	0
ERS451417_02022	1717.62.peg.2027	NA	NA	NA	0.9966	38	Cargentoratense_DSM44202,"Catypicum_R2070","Caurimucosum_ATCC700975","Cbelfantii_FRC0043","Ccallunae_DSM20147","Ccamporealensis_DSM44610","Cdeserti_GIMN1010","Cdiphtheriae_NCTC11397","Cdoosanense_DSM45436","Cefficiens_YS314","Cepidermidicanis_DSM45586","Cfalsenii_DSM44353","Cglutamicum_ATCC13032","Cglycinophilum_AJ3170","Chalotolerans_YIM70093","Chumireducens_DSM45392","Cimitans_DSM44264","Cjeike…	0.409958	0.136098	1.88219	0.249865	0.136098	1.8822	258	0
ERS451417_01874	1717.62.peg.1876	NA	NA	NA	0.9968	25	Cargentoratense_DSM44202,"Catypicum_R2070","Cbelfantii_FRC0043","Ccallunae_DSM20147","Cdeserti_GIMN1010","Cdiphtheriae_NCTC11397","Cefficiens_YS314","Cglutamicum_ATCC13032","Cglycinophilum_AJ3170","Chalotolerans_YIM70093","Chumireducens_DSM45392","Ckroppenstedtii_DSM44385","Clactis_RW25","Cmarinum_DSM44953","Cmaris_DSM45190","Cmustelae_DSM45274","Cpseudotuberculosis_31","Cpseudotuberculosis_ATCC1…	0.312955	0.312946	1.30555	0.351178	0.312957	1.30555	3330	0
ERS451417_00728	1717.62.peg.731	NA	NA	NA	0.9968	14	Cbelfantii_FRC0043,"Ccallunae_DSM20147","Cdeserti_GIMN1010","Cdiphtheriae_NCTC11397","Cefficiens_YS314","Cglutamicum_ATCC13032","Ckutscheri_DSM20755","Cpseudotuberculosis_31","Cpseudotuberculosis_ATCC19410","Crouxii_FRC0190","Csilvaticum_KL0182","Culcerans_NCTC12077","Culcerans_NCTC7910","Cvitaeruminis_DSM20294"	0.0979199	0.0872472	1.82291	0.175882	0.0872572	1.82291	258	0
ERS451417_00637	1717.62.peg.641	NA	NA	NA	0.9968	38	Catypicum_R2070,"Caurimucosum_ATCC700975","Cbelfantii_FRC0043","Ccallunae_DSM20147","Ccamporealensis_DSM44610","Cdeserti_GIMN1010","Cdiphtheriae_NCTC11397","Cdoosanense_DSM45436","Cefficiens_YS314","Cepidermidicanis_DSM45586","Cfalsenii_DSM44353","Cglutamicum_ATCC13032","Cglycinophilum_AJ3170","Chalotolerans_YIM70093","Chumireducens_DSM45392","Cimitans_DSM44264","Cjeikeium_K41","Ckroppenstedtii_D…	0.421371	0.141093	1.30285	0.241394	0.141102	1.30285	2306	0
ERS451417_00861	1717.62.peg.866	NA	NA	NA	0.9968	31	Cargentoratense_DSM44202,"Catypicum_R2070","Caurimucosum_ATCC700975","Cbelfantii_FRC0043","Ccallunae_DSM20147","Ccamporealensis_DSM44610","Cdeserti_GIMN1010","Cdiphtheriae_NCTC11397","Cdoosanense_DSM45436","Cefficiens_YS314","Cepidermidicanis_DSM45586","Cfalsenii_DSM44353","Cglutamicum_ATCC13032","Cglycinophilum_AJ3170","Chumireducens_DSM45392","Cimitans_DSM44264","Ckroppenstedtii_DSM44385","Ckut…	0.105454	0.105454	1.88655	0.105454	0.105454	1.88655	258	0
ERS451417_00757	1717.62.peg.762	NA	NA	NA	0.9968	39	Cargentoratense_DSM44202,"Catypicum_R2070","Caurimucosum_ATCC700975","Cbelfantii_FRC0043","Ccallunae_DSM20147","Ccamporealensis_DSM44610","Cdeserti_GIMN1010","Cdiphtheriae_NCTC11397","Cdoosanense_DSM45436","Cefficiens_YS314","Cepidermidicanis_DSM45586","Cfalsenii_DSM44353","Cglutamicum_ATCC13032","Cglycinophilum_AJ3170","Chalotolerans_YIM70093","Chumireducens_DSM45392","Cimitans_DSM44264","Cjeike…	0.466299	0.156833	2.32821	0.26807	0.156843	2.32821	258	0
ERS451417_00002	1717.62.peg.3	NA	NA	NA	0.9968	39	Cargentoratense_DSM44202,"Catypicum_R2070","Caurimucosum_ATCC700975","Cbelfantii_FRC0043","Ccallunae_DSM20147","Ccamporealensis_DSM44610","Cdeserti_GIMN1010","Cdiphtheriae_NCTC11397","Cdoosanense_DSM45436","Cefficiens_YS314","Cepidermidicanis_DSM45586","Cfalsenii_DSM44353","Cglutamicum_ATCC13032","Cglycinophilum_AJ3170","Chalotolerans_YIM70093","Chumireducens_DSM45392","Cimitans_DSM44264","Cjeike…	0.185217	0.185217	1.76896	0.185216	0.185216	1.76896	2306	0
ERS451417_00396	1717.62.peg.396	NA	NA	NA	0.997	39	Cargentoratense_DSM44202,"Catypicum_R2070","Caurimucosum_ATCC700975","Cbelfantii_FRC0043","Ccallunae_DSM20147","Ccamporealensis_DSM44610","Cdeserti_GIMN1010","Cdiphtheriae_NCTC11397","Cdoosanense_DSM45436","Cefficiens_YS314","Cepidermidicanis_DSM45586","Cfalsenii_DSM44353","Cglutamicum_ATCC13032","Cglycinophilum_AJ3170","Chalotolerans_YIM70093","Chumireducens_DSM45392","Cimitans_DSM44264","Cjeike…	0.426948	0.175528	1.80802	0.291284	0.175528	1.80801	258	0
ERS451417_00306	1717.62.peg.307	NA	NA	NA	0.997	36	Cargentoratense_DSM44202,"Catypicum_R2070","Caurimucosum_ATCC700975","Cbelfantii_FRC0043","Ccallunae_DSM20147","Ccamporealensis_DSM44610","Cdeserti_GIMN1010","Cdiphtheriae_NCTC11397","Cdoosanense_DSM45436","Cefficiens_YS314","Cepidermidicanis_DSM45586","Cfalsenii_DSM44353","Cglutamicum_ATCC13032","Cglycinophilum_AJ3170","Chalotolerans_YIM70093","Chumireducens_DSM45392","Cimitans_DSM44264","Cjeike…	0.160319	0.160273	1.3453	0.252264	0.160273	1.3453	2306	0
ERS451417_01652	1717.62.peg.1659	NA	NA	NA	0.997	38	Cargentoratense_DSM44202,"Catypicum_R2070","Caurimucosum_ATCC700975","Cbelfantii_FRC0043","Ccallunae_DSM20147","Ccamporealensis_DSM44610","Cdeserti_GIMN1010","Cdiphtheriae_NCTC11397","Cdoosanense_DSM45436","Cefficiens_YS314","Cepidermidicanis_DSM45586","Cfalsenii_DSM44353","Cglutamicum_ATCC13032","Cglycinophilum_AJ3170","Chalotolerans_YIM70093","Chumireducens_DSM45392","Cimitans_DSM44264","Cjeike…	0.530231	0.246118	1.50966	0.36173	0.246117	1.50966	258	0
ERS451417_00070	1717.62.peg.66	NA	NA	NA	0.997	10	Cbelfantii_FRC0043,"Cdiphtheriae_NCTC11397","Cepidermidicanis_DSM45586","Ckutscheri_DSM20755","Cpseudotuberculosis_31","Cpseudotuberculosis_ATCC19410","Crouxii_FRC0190","Csilvaticum_KL0182","Culcerans_NCTC12077","Culcerans_NCTC7910"	0.357451	0.357451	4.79209	0.370117	0.357461	4.7921	258	0
ERS451417_01203	1717.62.peg.1211	NA	NA	NA	0.997	39	Cargentoratense_DSM44202,"Catypicum_R2070","Caurimucosum_ATCC700975","Cbelfantii_FRC0043","Ccallunae_DSM20147","Ccamporealensis_DSM44610","Cdeserti_GIMN1010","Cdiphtheriae_NCTC11397","Cdoosanense_DSM45436","Cefficiens_YS314","Cepidermidicanis_DSM45586","Cfalsenii_DSM44353","Cglutamicum_ATCC13032","Cglycinophilum_AJ3170","Chalotolerans_YIM70093","Chumireducens_DSM45392","Cimitans_DSM44264","Cjeike…	0.156222	0.156222	1.98982	0.156222	0.156222	1.98981	2306	0
ERS451417_01599	1717.62.peg.1608	NA	NA	NA	0.9972	27	Catypicum_R2070,"Cbelfantii_FRC0043","Ccallunae_DSM20147","Ccamporealensis_DSM44610","Cdeserti_GIMN1010","Cdiphtheriae_NCTC11397","Cdoosanense_DSM45436","Cefficiens_YS314","Cepidermidicanis_DSM45586","Cglutamicum_ATCC13032","Chalotolerans_YIM70093","Chumireducens_DSM45392","Cimitans_DSM44264","Ckutscheri_DSM20755","Cmarinum_DSM44953","Cpseudotuberculosis_31","Cpseudotuberculosis_ATCC19410","Crieg…	0.726109	0.396805	1.80413	0.51865	0.396795	1.80413	3330	0
ERS451417_01327	1717.62.peg.1335	NA	NA	NA	0.9972	38	Cargentoratense_DSM44202,"Catypicum_R2070","Caurimucosum_ATCC700975","Cbelfantii_FRC0043","Ccallunae_DSM20147","Ccamporealensis_DSM44610","Cdeserti_GIMN1010","Cdiphtheriae_NCTC11397","Cdoosanense_DSM45436","Cefficiens_YS314","Cepidermidicanis_DSM45586","Cfalsenii_DSM44353","Cglutamicum_ATCC13032","Cglycinophilum_AJ3170","Chalotolerans_YIM70093","Chumireducens_DSM45392","Cimitans_DSM44264","Cjeike…	0.417725	0.155308	2.18533	0.285012	0.155308	2.18533	1282	0
ERS451417_00399	1717.62.peg.399	NA	NA	NA	0.9972	39	Cargentoratense_DSM44202,"Catypicum_R2070","Caurimucosum_ATCC700975","Cbelfantii_FRC0043","Ccallunae_DSM20147","Ccamporealensis_DSM44610","Cdeserti_GIMN1010","Cdiphtheriae_NCTC11397","Cdoosanense_DSM45436","Cefficiens_YS314","Cepidermidicanis_DSM45586","Cfalsenii_DSM44353","Cglutamicum_ATCC13032","Cglycinophilum_AJ3170","Chalotolerans_YIM70093","Chumireducens_DSM45392","Cimitans_DSM44264","Cjeike…	0.438994	0.151	1.85769	0.276704	0.151	1.85762	258	0
ERS451417_02283	1717.62.peg.2312	NA	NA	NA	0.9972	38	Cargentoratense_DSM44202,"Catypicum_R2070","Caurimucosum_ATCC700975","Cbelfantii_FRC0043","Ccallunae_DSM20147","Ccamporealensis_DSM44610","Cdeserti_GIMN1010","Cdiphtheriae_NCTC11397","Cdoosanense_DSM45436","Cefficiens_YS314","Cepidermidicanis_DSM45586","Cfalsenii_DSM44353","Cglutamicum_ATCC13032","Cglycinophilum_AJ3170","Chalotolerans_YIM70093","Chumireducens_DSM45392","Cimitans_DSM44264","Cjeike…	0.460857	0.162363	1.34989	0.285247	0.162363	1.34989	258	0
ERS451417_02405	1717.62.peg.2437	NA	NA	NA	0.9975	33	Cargentoratense_DSM44202,"Catypicum_R2070","Caurimucosum_ATCC700975","Cbelfantii_FRC0043","Ccallunae_DSM20147","Ccamporealensis_DSM44610","Cdeserti_GIMN1010","Cdiphtheriae_NCTC11397","Cdoosanense_DSM45436","Cefficiens_YS314","Cepidermidicanis_DSM45586","Cfalsenii_DSM44353","Cglutamicum_ATCC13032","Cimitans_DSM44264","Cjeikeium_K41","Ckroppenstedtii_DSM44385","Ckutscheri_DSM20755","Clactis_RW25","…	0.628561	0.249312	2.12097	0.380044	0.249322	2.12097	258	0
ERS451417_02238	1717.62.peg.2263	NA	NA	NA	0.9975	38	Cargentoratense_DSM44202,"Catypicum_R2070","Caurimucosum_ATCC700975","Cbelfantii_FRC0043","Ccallunae_DSM20147","Ccamporealensis_DSM44610","Cdeserti_GIMN1010","Cdiphtheriae_NCTC11397","Cdoosanense_DSM45436","Cefficiens_YS314","Cepidermidicanis_DSM45586","Cfalsenii_DSM44353","Cglutamicum_ATCC13032","Cglycinophilum_AJ3170","Chalotolerans_YIM70093","Chumireducens_DSM45392","Cimitans_DSM44264","Cjeike…	0.105175	0.105175	1.609	0.105175	0.105175	1.609	258	0
ERS451417_01213	1717.62.peg.1221	NA	NA	NA	0.9975	10	Cbelfantii_FRC0043,"Cdiphtheriae_NCTC11397","Ckutscheri_DSM20755","Cpseudotuberculosis_31","Cpseudotuberculosis_ATCC19410","Crouxii_FRC0190","Csilvaticum_KL0182","Culcerans_NCTC12077","Culcerans_NCTC7910","Cvitaeruminis_DSM20294"	0.131204	0.131204	2.84722	0.131213	0.131213	2.84726	258	0
ERS451417_00988	1717.62.peg.999	NA	NA	NA	0.9977	39	Cargentoratense_DSM44202,"Catypicum_R2070","Caurimucosum_ATCC700975","Cbelfantii_FRC0043","Ccallunae_DSM20147","Ccamporealensis_DSM44610","Cdeserti_GIMN1010","Cdiphtheriae_NCTC11397","Cdoosanense_DSM45436","Cefficiens_YS314","Cepidermidicanis_DSM45586","Cfalsenii_DSM44353","Cglutamicum_ATCC13032","Cglycinophilum_AJ3170","Chalotolerans_YIM70093","Chumireducens_DSM45392","Cimitans_DSM44264","Cjeike…	0.520757	0.215222	1.60315	0.339596	0.215222	1.60315	258	0
ERS451417_01826	1717.62.peg.1831	NA	NA	NA	0.9977	14	Cbelfantii_FRC0043,"Ccallunae_DSM20147","Cdeserti_GIMN1010","Cdiphtheriae_NCTC11397","Cdoosanense_DSM45436","Cglutamicum_ATCC13032","Clactis_RW25","Cpseudotuberculosis_31","Cpseudotuberculosis_ATCC19410","Csilvaticum_KL0182","Csimulans_PES1","Culcerans_NCTC12077","Culcerans_NCTC7910","Cuterequi_DSM45634"	0.134016	0.133968	1.59434	0.240769	0.133957	1.59434	3330	0
ERS451417_01683	1717.62.peg.1690	NA	NA	NA	0.9977	31	Caurimucosum_ATCC700975,"Cbelfantii_FRC0043","Ccallunae_DSM20147","Cdeserti_GIMN1010","Cdiphtheriae_NCTC11397","Cdoosanense_DSM45436","Cefficiens_YS314","Cepidermidicanis_DSM45586","Cfalsenii_DSM44353","Cglycinophilum_AJ3170","Chalotolerans_YIM70093","Cimitans_DSM44264","Cjeikeium_K41","Ckroppenstedtii_DSM44385","Ckutscheri_DSM20755","Clactis_RW25","Cmarinum_DSM44953","Cmaris_DSM45190","Cmustelae…	0.65747	0.265516	1.23806	0.383117	0.265516	1.23806	3330	0
ERS451417_00643	1717.62.peg.647	NA	NA	NA	0.9977	19	Cargentoratense_DSM44202,"Caurimucosum_ATCC700975","Cbelfantii_FRC0043","Cdiphtheriae_NCTC11397","Cepidermidicanis_DSM45586","Chalotolerans_YIM70093","Chumireducens_DSM45392","Ckutscheri_DSM20755","Cmustelae_DSM45274","Cpseudotuberculosis_31","Cpseudotuberculosis_ATCC19410","Crouxii_FRC0190","Csilvaticum_KL0182","Csimulans_PES1","Csingulare_IBSB52218","Ctestudinoris_DSM44614","Culcerans_NCTC12077…	0.0775401	0.0760268	1.51676	0.125663	0.0760268	1.51676	258	0
ERS451417_02315	1717.62.peg.2342	NA	NA	NA	0.9977	38	Cargentoratense_DSM44202,"Catypicum_R2070","Caurimucosum_ATCC700975","Cbelfantii_FRC0043","Ccallunae_DSM20147","Ccamporealensis_DSM44610","Cdeserti_GIMN1010","Cdiphtheriae_NCTC11397","Cdoosanense_DSM45436","Cefficiens_YS314","Cepidermidicanis_DSM45586","Cfalsenii_DSM44353","Cglutamicum_ATCC13032","Cglycinophilum_AJ3170","Chalotolerans_YIM70093","Chumireducens_DSM45392","Cimitans_DSM44264","Cjeike…	0.74556	0.260943	1.86711	0.400941	0.260952	1.86711	258	0
ERS451417_01990	1717.62.peg.1991	NA	NA	NA	0.9977	7	Cbelfantii_FRC0043,"Cdiphtheriae_NCTC11397","Cpseudotuberculosis_ATCC19410","Csilvaticum_KL0182","Culcerans_NCTC12077","Culcerans_NCTC7910","Cvitaeruminis_DSM20294"	0.24758	0.24758	3.145	0.24758	0.24758	3.145	4098	3	1. 0.51857;2. 104;3. 310;4. 180;5. 144;6. 430;7. 144;8. 430;9. 250;10. V;11. GTG	1. 0.60409;2. 184;3. 550;4. 324;5. 224;6. 670;7. 224;8. 670;9. 490;10. M;11. ATG	1. 0.90294;2. 225;3. 673;4. 371;5. 265;6. 793;7. 265;8. 793;9. 595;10. A;11. GCG
ERS451417_01943	1717.62.peg.1941	NA	NA	NA	0.9977	12	Cbelfantii_FRC0043,"Cdiphtheriae_NCTC11397","Cjeikeium_K41","Ckutscheri_DSM20755","Clactis_RW25","Cpseudotuberculosis_31","Cpseudotuberculosis_ATCC19410","CriegeliiPUDD83A45","Csilvaticum_KL0182","Csimulans_PES1","Culcerans_NCTC12077","Culcerans_NCTC7910"	0.191814	0.191755	2.87612	0.198382	0.191765	2.87612	1282	0
ERS451417_02327	1717.62.peg.2354	NA	NA	NA	0.9977	16	Catypicum_R2070,"Cbelfantii_FRC0043","Cdeserti_GIMN1010","Cdiphtheriae_NCTC11397","Cdoosanense_DSM45436","Cefficiens_YS314","Cglutamicum_ATCC13032","Cglycinophilum_AJ3170","Chalotolerans_YIM70093","Ckutscheri_DSM20755","Cmaris_DSM45190","Cpseudotuberculosis_31","Cpseudotuberculosis_ATCC19410","Cterpenotabidum_Y11","Culcerans_NCTC12077","Culcerans_NCTC7910"	0.169042	0.167006	1.51594	0.190274	0.167006	1.51594	258	0
ERS451417_01586	1717.62.peg.1595	NA	NA	NA	0.998	37	Cargentoratense_DSM44202,"Catypicum_R2070","Caurimucosum_ATCC700975","Cbelfantii_FRC0043","Ccallunae_DSM20147","Ccamporealensis_DSM44610","Cdeserti_GIMN1010","Cdiphtheriae_NCTC11397","Cdoosanense_DSM45436","Cefficiens_YS314","Cepidermidicanis_DSM45586","Cfalsenii_DSM44353","Cglutamicum_ATCC13032","Cglycinophilum_AJ3170","Chalotolerans_YIM70093","Chumireducens_DSM45392","Cimitans_DSM44264","Cjeike…	0.193967	0.193967	1.68291	0.193968	0.193958	1.68255	258	0
ERS451417_01746	1717.62.peg.1749	NA	NA	NA	0.998	6	Cbelfantii_FRC0043,"Cdiphtheriae_NCTC11397","Cpseudotuberculosis_ATCC19410","Csilvaticum_KL0182","Culcerans_NCTC12077","Culcerans_NCTC7910"	0.158897	0.158897	3.23092	0.158897	0.158897	3.23092	4354	0
ERS451417_01474	1717.62.peg.1484	NA	NA	NA	0.998	21	Cargentoratense_DSM44202,"Catypicum_R2070","Cbelfantii_FRC0043","Ccallunae_DSM20147","Ccamporealensis_DSM44610","Cdeserti_GIMN1010","Cdiphtheriae_NCTC11397","Cdoosanense_DSM45436","Cfalsenii_DSM44353","Cglycinophilum_AJ3170","Chumireducens_DSM45392","Ckutscheri_DSM20755","Cmaris_DSM45190","Cmustelae_DSM45274","Cpseudotuberculosis_31","Cpseudotuberculosis_ATCC19410","Csilvaticum_KL0182","Csimulans…	0.687201	0.318891	2.22481	0.435117	0.318892	2.22481	258	0
ERS451417_00482	1717.62.peg.485	NA	NA	NA	0.998	39	Cargentoratense_DSM44202,"Catypicum_R2070","Caurimucosum_ATCC700975","Cbelfantii_FRC0043","Ccallunae_DSM20147","Ccamporealensis_DSM44610","Cdeserti_GIMN1010","Cdiphtheriae_NCTC11397","Cdoosanense_DSM45436","Cefficiens_YS314","Cepidermidicanis_DSM45586","Cfalsenii_DSM44353","Cglutamicum_ATCC13032","Cglycinophilum_AJ3170","Chalotolerans_YIM70093","Chumireducens_DSM45392","Cimitans_DSM44264","Cjeike…	0.671158	0.200867	2.12305	0.34506	0.200877	2.12314	2306	0
ERS451417_00217	1717.62.peg.214	NA	NA	NA	0.998	11	Cbelfantii_FRC0043,"Cdiphtheriae_NCTC11397","Ckutscheri_DSM20755","Cmustelae_DSM45274","Cpseudotuberculosis_31","Cpseudotuberculosis_ATCC19410","Crouxii_FRC0190","Csilvaticum_KL0182","Culcerans_NCTC12077","Culcerans_NCTC7910","Cvitaeruminis_DSM20294"	0.149202	0.148494	2.12641	0.226814	0.148503	2.1264	258	0
ERS451417_02034	1717.62.peg.2039	NA	NA	NA	0.998	38	Cargentoratense_DSM44202,"Catypicum_R2070","Caurimucosum_ATCC700975","Cbelfantii_FRC0043","Ccallunae_DSM20147","Ccamporealensis_DSM44610","Cdeserti_GIMN1010","Cdiphtheriae_NCTC11397","Cdoosanense_DSM45436","Cefficiens_YS314","Cepidermidicanis_DSM45586","Cfalsenii_DSM44353","Cglutamicum_ATCC13032","Cglycinophilum_AJ3170","Chalotolerans_YIM70093","Chumireducens_DSM45392","Cimitans_DSM44264","Cjeike…	0.0958951	0.0958951	1.99081	0.0958951	0.0958951	1.99081	258	0
ERS451417_00758	1717.62.peg.763	NA	NA	NA	0.998	39	Cargentoratense_DSM44202,"Catypicum_R2070","Caurimucosum_ATCC700975","Cbelfantii_FRC0043","Ccallunae_DSM20147","Ccamporealensis_DSM44610","Cdeserti_GIMN1010","Cdiphtheriae_NCTC11397","Cdoosanense_DSM45436","Cefficiens_YS314","Cepidermidicanis_DSM45586","Cfalsenii_DSM44353","Cglutamicum_ATCC13032","Cglycinophilum_AJ3170","Chalotolerans_YIM70093","Chumireducens_DSM45392","Cimitans_DSM44264","Cjeike…	0.317053	0.117585	2.72259	0.205112	0.117585	2.72259	2306	0
ERS451417_00238	1717.62.peg.234	NA	NA	NA	0.998	37	Cargentoratense_DSM44202,"Catypicum_R2070","Caurimucosum_ATCC700975","Cbelfantii_FRC0043","Ccallunae_DSM20147","Ccamporealensis_DSM44610","Cdeserti_GIMN1010","Cdiphtheriae_NCTC11397","Cdoosanense_DSM45436","Cepidermidicanis_DSM45586","Cfalsenii_DSM44353","Cglutamicum_ATCC13032","Cglycinophilum_AJ3170","Chalotolerans_YIM70093","Chumireducens_DSM45392","Cimitans_DSM44264","Cjeikeium_K41","Ckroppens…	0.454129	0.14966	1.49498	0.245723	0.14966	1.49498	3330	0
ERS451417_01648	1717.62.peg.1655	NA	NA	NA	0.9984	38	Cargentoratense_DSM44202,"Catypicum_R2070","Caurimucosum_ATCC700975","Cbelfantii_FRC0043","Ccallunae_DSM20147","Ccamporealensis_DSM44610","Cdeserti_GIMN1010","Cdiphtheriae_NCTC11397","Cdoosanense_DSM45436","Cefficiens_YS314","Cepidermidicanis_DSM45586","Cfalsenii_DSM44353","Cglutamicum_ATCC13032","Cglycinophilum_AJ3170","Chalotolerans_YIM70093","Chumireducens_DSM45392","Cimitans_DSM44264","Cjeike…	0.116381	0.116381	1.68438	0.116381	0.116381	1.68438	258	0
ERS451417_01176	1717.62.peg.1185	NA	NA	NA	0.9984	8	Cbelfantii_FRC0043,"Cdiphtheriae_NCTC11397","Cpseudotuberculosis_31","Cpseudotuberculosis_ATCC19410","Crouxii_FRC0190","Csilvaticum_KL0182","Culcerans_NCTC12077","Culcerans_NCTC7910"	1.10158	0.682751	3.58099	0.737294	0.682751	3.58099	2304	0
ERS451417_01359	1717.62.peg.1367	NA	NA	NA	0.9984	7	Cbelfantii_FRC0043,"Cdiphtheriae_NCTC11397","Cpseudotuberculosis_31","Cpseudotuberculosis_ATCC19410","Csilvaticum_KL0182","Culcerans_NCTC12077","Culcerans_NCTC7910"	0.180551	0.180551	4.18817	0.180551	0.180551	4.18817	258	0
ERS451417_00563	1717.62.peg.566	NA	NA	NA	0.9984	39	Cargentoratense_DSM44202,"Catypicum_R2070","Caurimucosum_ATCC700975","Cbelfantii_FRC0043","Ccallunae_DSM20147","Ccamporealensis_DSM44610","Cdeserti_GIMN1010","Cdiphtheriae_NCTC11397","Cdoosanense_DSM45436","Cefficiens_YS314","Cepidermidicanis_DSM45586","Cfalsenii_DSM44353","Cglutamicum_ATCC13032","Cglycinophilum_AJ3170","Chalotolerans_YIM70093","Chumireducens_DSM45392","Cimitans_DSM44264","Cjeike…	0.152986	0.152986	1.67293	0.152976	0.152976	1.67293	258	0
ERS451417_01286	1717.62.peg.1294	NA	NA	NA	0.9984	33	Catypicum_R2070,"Caurimucosum_ATCC700975","Cbelfantii_FRC0043","Ccallunae_DSM20147","Ccamporealensis_DSM44610","Cdiphtheriae_NCTC11397","Cdoosanense_DSM45436","Cefficiens_YS314","Cepidermidicanis_DSM45586","Cfalsenii_DSM44353","Cglutamicum_ATCC13032","Cglycinophilum_AJ3170","Chalotolerans_YIM70093","Cimitans_DSM44264","Cjeikeium_K41","Ckutscheri_DSM20755","Clactis_RW25","Cmarinum_DSM44953","Cmari…	0.554282	0.250609	1.8486	0.379389	0.250608	1.8486	258	0
ERS451417_00746	1717.62.peg.749	NA	NA	NA	0.9984	39	Cargentoratense_DSM44202,"Catypicum_R2070","Caurimucosum_ATCC700975","Cbelfantii_FRC0043","Ccallunae_DSM20147","Ccamporealensis_DSM44610","Cdeserti_GIMN1010","Cdiphtheriae_NCTC11397","Cdoosanense_DSM45436","Cefficiens_YS314","Cepidermidicanis_DSM45586","Cfalsenii_DSM44353","Cglutamicum_ATCC13032","Cglycinophilum_AJ3170","Chalotolerans_YIM70093","Chumireducens_DSM45392","Cimitans_DSM44264","Cjeike…	0.199647	0.199647	1.67238	0.199647	0.199647	1.67238	258	0
ERS451417_01784	1717.62.peg.1789	NA	NA	NA	0.9984	26	Catypicum_R2070,"Caurimucosum_ATCC700975","Cbelfantii_FRC0043","Ccallunae_DSM20147","Ccamporealensis_DSM44610","Cdeserti_GIMN1010","Cdiphtheriae_NCTC11397","Cdoosanense_DSM45436","Cefficiens_YS314","Cglutamicum_ATCC13032","Chalotolerans_YIM70093","Chumireducens_DSM45392","Cimitans_DSM44264","Ckutscheri_DSM20755","Cmarinum_DSM44953","Cmaris_DSM45190","Cpseudotuberculosis_31","Cpseudotuberculosis_A…	0.366057	0.121961	1.88083	0.228125	0.121961	1.88083	3330	0
ERS451417_00704	1717.62.peg.709	NA	NA	NA	0.9984	38	Cargentoratense_DSM44202,"Catypicum_R2070","Caurimucosum_ATCC700975","Cbelfantii_FRC0043","Ccallunae_DSM20147","Ccamporealensis_DSM44610","Cdeserti_GIMN1010","Cdiphtheriae_NCTC11397","Cdoosanense_DSM45436","Cefficiens_YS314","Cepidermidicanis_DSM45586","Cfalsenii_DSM44353","Cglutamicum_ATCC13032","Cglycinophilum_AJ3170","Chalotolerans_YIM70093","Chumireducens_DSM45392","Cimitans_DSM44264","Cjeike…	0.120438	0.120438	2.00393	0.122436	0.120428	2.00393	5378	0
ERS451417_00511	1717.62.peg.515	NA	NA	NA	0.9984	33	Cargentoratense_DSM44202,"Catypicum_R2070","Caurimucosum_ATCC700975","Cbelfantii_FRC0043","Ccallunae_DSM20147","Ccamporealensis_DSM44610","Cdeserti_GIMN1010","Cdiphtheriae_NCTC11397","Cdoosanense_DSM45436","Cefficiens_YS314","Cepidermidicanis_DSM45586","Cglutamicum_ATCC13032","Cglycinophilum_AJ3170","Chalotolerans_YIM70093","Chumireducens_DSM45392","Cimitans_DSM44264","Ckutscheri_DSM20755","Cmari…	0.477757	0.175446	1.77006	0.298748	0.175446	1.77006	1282	0
ERS451417_01492	1717.62.peg.1500	NA	NA	NA	0.9984	38	Cargentoratense_DSM44202,"Catypicum_R2070","Caurimucosum_ATCC700975","Cbelfantii_FRC0043","Ccallunae_DSM20147","Ccamporealensis_DSM44610","Cdeserti_GIMN1010","Cdiphtheriae_NCTC11397","Cdoosanense_DSM45436","Cefficiens_YS314","Cepidermidicanis_DSM45586","Cfalsenii_DSM44353","Cglutamicum_ATCC13032","Cglycinophilum_AJ3170","Chalotolerans_YIM70093","Chumireducens_DSM45392","Cimitans_DSM44264","Cjeike…	0.140892	0.140892	1.81301	0.140892	0.140892	1.81301	258	0
ERS451417_00404	1717.62.peg.404	NA	NA	NA	0.9984	39	Cargentoratense_DSM44202,"Catypicum_R2070","Caurimucosum_ATCC700975","Cbelfantii_FRC0043","Ccallunae_DSM20147","Ccamporealensis_DSM44610","Cdeserti_GIMN1010","Cdiphtheriae_NCTC11397","Cdoosanense_DSM45436","Cefficiens_YS314","Cepidermidicanis_DSM45586","Cfalsenii_DSM44353","Cglutamicum_ATCC13032","Cglycinophilum_AJ3170","Chalotolerans_YIM70093","Chumireducens_DSM45392","Cimitans_DSM44264","Cjeike…	0.634816	0.254509	2.34406	0.392066	0.254509	2.34406	258	0
ERS451417_01723	1717.62.peg.1726	NA	NA	NA	0.9989	38	Cargentoratense_DSM44202,"Catypicum_R2070","Caurimucosum_ATCC700975","Cbelfantii_FRC0043","Ccallunae_DSM20147","Ccamporealensis_DSM44610","Cdeserti_GIMN1010","Cdiphtheriae_NCTC11397","Cdoosanense_DSM45436","Cefficiens_YS314","Cepidermidicanis_DSM45586","Cfalsenii_DSM44353","Cglutamicum_ATCC13032","Cglycinophilum_AJ3170","Chalotolerans_YIM70093","Chumireducens_DSM45392","Cimitans_DSM44264","Cjeike…	0.127942	0.127942	1.83806	0.127942	0.127942	1.83807	258	0
ERS451417_00895	1717.62.peg.901	NA	NA	NA	0.9989	36	Cargentoratense_DSM44202,"Catypicum_R2070","Caurimucosum_ATCC700975","Cbelfantii_FRC0043","Ccallunae_DSM20147","Ccamporealensis_DSM44610","Cdeserti_GIMN1010","Cdiphtheriae_NCTC11397","Cdoosanense_DSM45436","Cefficiens_YS314","Cepidermidicanis_DSM45586","Cfalsenii_DSM44353","Cglutamicum_ATCC13032","Chalotolerans_YIM70093","Chumireducens_DSM45392","Cimitans_DSM44264","Cjeikeium_K41","Ckroppenstedti…	0.102883	0.102883	1.67151	0.102883	0.102883	1.67151	258	0
ERS451417_01872	1717.62.peg.1874	NA	NA	NA	0.9989	38	Cargentoratense_DSM44202,"Catypicum_R2070","Caurimucosum_ATCC700975","Cbelfantii_FRC0043","Ccallunae_DSM20147","Ccamporealensis_DSM44610","Cdeserti_GIMN1010","Cdiphtheriae_NCTC11397","Cdoosanense_DSM45436","Cefficiens_YS314","Cepidermidicanis_DSM45586","Cfalsenii_DSM44353","Cglutamicum_ATCC13032","Cglycinophilum_AJ3170","Chalotolerans_YIM70093","Chumireducens_DSM45392","Cimitans_DSM44264","Cjeike…	0.342131	0.0844821	7.37219	0.190599	0.0844822	7.37219	258	0
ERS451417_02305	1717.62.peg.2332	NA	NA	NA	0.9989	34	Catypicum_R2070,"Caurimucosum_ATCC700975","Cbelfantii_FRC0043","Ccallunae_DSM20147","Ccamporealensis_DSM44610","Cdeserti_GIMN1010","Cdiphtheriae_NCTC11397","Cdoosanense_DSM45436","Cefficiens_YS314","Cepidermidicanis_DSM45586","Cfalsenii_DSM44353","Cglutamicum_ATCC13032","Cglycinophilum_AJ3170","Chalotolerans_YIM70093","Chumireducens_DSM45392","Cimitans_DSM44264","Cjeikeium_K41","Ckutscheri_DSM207…	0.426881	0.279441	1.9863	0.403901	0.279431	1.9863	2306	0
ERS451417_00677	1717.62.peg.684	NA	NA	NA	0.9989	39	Cargentoratense_DSM44202,"Catypicum_R2070","Caurimucosum_ATCC700975","Cbelfantii_FRC0043","Ccallunae_DSM20147","Ccamporealensis_DSM44610","Cdeserti_GIMN1010","Cdiphtheriae_NCTC11397","Cdoosanense_DSM45436","Cefficiens_YS314","Cepidermidicanis_DSM45586","Cfalsenii_DSM44353","Cglutamicum_ATCC13032","Cglycinophilum_AJ3170","Chalotolerans_YIM70093","Chumireducens_DSM45392","Cimitans_DSM44264","Cjeike…	0.0765887	0.0765887	1.66885	0.0765887	0.0765887	1.66885	258	0
ERS451417_02057	1717.62.peg.2069	NA	NA	NA	0.9989	38	Cargentoratense_DSM44202,"Catypicum_R2070","Caurimucosum_ATCC700975","Cbelfantii_FRC0043","Ccallunae_DSM20147","Ccamporealensis_DSM44610","Cdeserti_GIMN1010","Cdiphtheriae_NCTC11397","Cdoosanense_DSM45436","Cefficiens_YS314","Cepidermidicanis_DSM45586","Cfalsenii_DSM44353","Cglutamicum_ATCC13032","Cglycinophilum_AJ3170","Chalotolerans_YIM70093","Chumireducens_DSM45392","Cimitans_DSM44264","Cjeike…	0.192135	0.192135	1.73832	0.192135	0.192135	1.73832	258	0
ERS451417_00801	1717.62.peg.808	NA	NA	NA	0.9989	37	Cargentoratense_DSM44202,"Catypicum_R2070","Caurimucosum_ATCC700975","Cbelfantii_FRC0043","Ccallunae_DSM20147","Ccamporealensis_DSM44610","Cdeserti_GIMN1010","Cdiphtheriae_NCTC11397","Cdoosanense_DSM45436","Cepidermidicanis_DSM45586","Cfalsenii_DSM44353","Cglutamicum_ATCC13032","Cglycinophilum_AJ3170","Chalotolerans_YIM70093","Chumireducens_DSM45392","Cimitans_DSM44264","Cjeikeium_K41","Ckroppens…	0.710136	0.354593	1.56269	0.471875	0.354583	1.56269	1282	0
ERS451417_01406	1717.62.peg.1419	NA	NA	NA	0.9989	10	Cbelfantii_FRC0043,"Cdiphtheriae_NCTC11397","Ckutscheri_DSM20755","Cmustelae_DSM45274","Cpseudotuberculosis_31","Cpseudotuberculosis_ATCC19410","Csilvaticum_KL0182","Culcerans_NCTC12077","Culcerans_NCTC7910","Cvitaeruminis_DSM20294"	0.141364	0.141364	1.78688	0.141364	0.141364	1.78687	2306	0
ERS451417_02214	1717.62.peg.2238	NA	NA	NA	0.9989	11	Cbelfantii_FRC0043,"Cdiphtheriae_NCTC11397","Chumireducens_DSM45392","Cmarinum_DSM44953","Cpseudotuberculosis_31","Cpseudotuberculosis_ATCC19410","Csilvaticum_KL0182","Ctestudinoris_DSM44614","Culcerans_NCTC12077","Culcerans_NCTC7910","Cvitaeruminis_DSM20294"	0.072013	0.072013	2.19452	0.072013	0.072013	2.19452	258	0
ERS451417_01007	1717.62.peg.1018	NA	NA	NA	0.9989	13	Caurimucosum_ATCC700975,"Cbelfantii_FRC0043","Ccallunae_DSM20147","Cdiphtheriae_NCTC11397","Chalotolerans_YIM70093","Cmarinum_DSM44953","Cpseudotuberculosis_31","Cpseudotuberculosis_ATCC19410","Crouxii_FRC0190","Csilvaticum_KL0182","Csingulare_IBSB52218","Culcerans_NCTC12077","Culcerans_NCTC7910"	0.210551	0.118994	2.1771	0.192059	0.118994	2.1771	1282	0
ERS451417_00528	1717.62.peg.531	NA	NA	NA	0.9989	9	Cbelfantii_FRC0043,"Cdiphtheriae_NCTC11397","Ckutscheri_DSM20755","Cpseudotuberculosis_31","Cpseudotuberculosis_ATCC19410","Crouxii_FRC0190","Culcerans_NCTC12077","Culcerans_NCTC7910","Cvitaeruminis_DSM20294"	0.153713	0.153704	2.815	0.154797	0.153704	2.815	2306	0
ERS451417_01431	1717.62.peg.1437	NA	NA	NA	0.9989	38	Cargentoratense_DSM44202,"Catypicum_R2070","Caurimucosum_ATCC700975","Cbelfantii_FRC0043","Ccallunae_DSM20147","Ccamporealensis_DSM44610","Cdeserti_GIMN1010","Cdiphtheriae_NCTC11397","Cdoosanense_DSM45436","Cefficiens_YS314","Cepidermidicanis_DSM45586","Cfalsenii_DSM44353","Cglutamicum_ATCC13032","Cglycinophilum_AJ3170","Chalotolerans_YIM70093","Chumireducens_DSM45392","Cimitans_DSM44264","Cjeike…	0.067254	0.067254	1.39392	0.067254	0.067254	1.39391	1282	0
ERS451417_01659	1717.62.peg.1666	NA	NA	NA	0.9989	10	Cbelfantii_FRC0043,"Cdiphtheriae_NCTC11397","Cefficiens_YS314","Ckutscheri_DSM20755","Cmustelae_DSM45274","Cpseudotuberculosis_31","Cpseudotuberculosis_ATCC19410","Csilvaticum_KL0182","Culcerans_NCTC12077","Culcerans_NCTC7910"	0.158385	0.158385	2.47034	0.158385	0.158385	2.47035	258	0
ERS451417_02362	1717.62.peg.2391	NA	NA	NA	0.9989	11	Caurimucosum_ATCC700975,"Cbelfantii_FRC0043","Cdiphtheriae_NCTC11397","Cpseudotuberculosis_31","Cpseudotuberculosis_ATCC19410","Csilvaticum_KL0182","Csimulans_PES1","Csingulare_IBSB52218","Culcerans_NCTC12077","Culcerans_NCTC7910","Cuterequi_DSM45634"	0.230358	0.229966	2.73132	0.232291	0.229966	2.73132	258	0
ERS451417_00351	1717.62.peg.354	NA	NA	NA	0.9989	39	Cargentoratense_DSM44202,"Catypicum_R2070","Caurimucosum_ATCC700975","Cbelfantii_FRC0043","Ccallunae_DSM20147","Ccamporealensis_DSM44610","Cdeserti_GIMN1010","Cdiphtheriae_NCTC11397","Cdoosanense_DSM45436","Cefficiens_YS314","Cepidermidicanis_DSM45586","Cfalsenii_DSM44353","Cglutamicum_ATCC13032","Cglycinophilum_AJ3170","Chalotolerans_YIM70093","Chumireducens_DSM45392","Cimitans_DSM44264","Cjeike…	0.250681	0.250681	1.77223	0.250681	0.250681	1.77223	1282	0
ERS451417_00675	1717.62.peg.682	NA	NA	NA	0.9989	37	Cargentoratense_DSM44202,"Catypicum_R2070","Caurimucosum_ATCC700975","Cbelfantii_FRC0043","Ccallunae_DSM20147","Ccamporealensis_DSM44610","Cdeserti_GIMN1010","Cdiphtheriae_NCTC11397","Cdoosanense_DSM45436","Cefficiens_YS314","Cepidermidicanis_DSM45586","Cfalsenii_DSM44353","Cglutamicum_ATCC13032","Cglycinophilum_AJ3170","Chalotolerans_YIM70093","Chumireducens_DSM45392","Cimitans_DSM44264","Cjeike…	0.185894	0.185894	1.66502	0.185894	0.185894	1.66502	3330	0
ERS451417_00370	1717.62.peg.369	NA	NA	NA	0.9989	39	Cargentoratense_DSM44202,"Catypicum_R2070","Caurimucosum_ATCC700975","Cbelfantii_FRC0043","Ccallunae_DSM20147","Ccamporealensis_DSM44610","Cdeserti_GIMN1010","Cdiphtheriae_NCTC11397","Cdoosanense_DSM45436","Cefficiens_YS314","Cepidermidicanis_DSM45586","Cfalsenii_DSM44353","Cglutamicum_ATCC13032","Cglycinophilum_AJ3170","Chalotolerans_YIM70093","Chumireducens_DSM45392","Cimitans_DSM44264","Cjeike…	0.103894	0.103894	2.02422	0.103894	0.103894	2.02421	258	0
ERS451417_00361	1717.62.peg.360	NA	NA	NA	0.9989	39	Cargentoratense_DSM44202,"Catypicum_R2070","Caurimucosum_ATCC700975","Cbelfantii_FRC0043","Ccallunae_DSM20147","Ccamporealensis_DSM44610","Cdeserti_GIMN1010","Cdiphtheriae_NCTC11397","Cdoosanense_DSM45436","Cefficiens_YS314","Cepidermidicanis_DSM45586","Cfalsenii_DSM44353","Cglutamicum_ATCC13032","Cglycinophilum_AJ3170","Chalotolerans_YIM70093","Chumireducens_DSM45392","Cimitans_DSM44264","Cjeike…	0.473476	0.160282	1.65322	0.275853	0.160272	1.65322	258	0
ERS451417_01641	1717.62.peg.1648	NA	NA	NA	0.9989	38	Cargentoratense_DSM44202,"Catypicum_R2070","Caurimucosum_ATCC700975","Cbelfantii_FRC0043","Ccallunae_DSM20147","Ccamporealensis_DSM44610","Cdeserti_GIMN1010","Cdiphtheriae_NCTC11397","Cdoosanense_DSM45436","Cefficiens_YS314","Cepidermidicanis_DSM45586","Cfalsenii_DSM44353","Cglutamicum_ATCC13032","Cglycinophilum_AJ3170","Chalotolerans_YIM70093","Chumireducens_DSM45392","Cimitans_DSM44264","Cjeike…	0.233482	0.233482	1.85113	0.233482	0.233482	1.85116	1282	0
ERS451417_00875	1717.62.peg.881	NA	NA	NA	0.9989	24	Catypicum_R2070,"Cbelfantii_FRC0043","Ccallunae_DSM20147","Ccamporealensis_DSM44610","Cdeserti_GIMN1010","Cdiphtheriae_NCTC11397","Cdoosanense_DSM45436","Cefficiens_YS314","Cepidermidicanis_DSM45586","Chalotolerans_YIM70093","Chumireducens_DSM45392","Cimitans_DSM44264","Ckutscheri_DSM20755","Cmarinum_DSM44953","Cmaris_DSM45190","Cmustelae_DSM45274","Cpseudotuberculosis_31","Cpseudotuberculosis_AT…	0.39242	0.246403	1.62931	0.341835	0.246404	1.62931	3330	0
ERS451417_01718	1717.62.peg.1721	NA	NA	NA	0.9989	38	Cargentoratense_DSM44202,"Catypicum_R2070","Caurimucosum_ATCC700975","Cbelfantii_FRC0043","Ccallunae_DSM20147","Ccamporealensis_DSM44610","Cdeserti_GIMN1010","Cdiphtheriae_NCTC11397","Cdoosanense_DSM45436","Cefficiens_YS314","Cepidermidicanis_DSM45586","Cfalsenii_DSM44353","Cglutamicum_ATCC13032","Cglycinophilum_AJ3170","Chalotolerans_YIM70093","Chumireducens_DSM45392","Cimitans_DSM44264","Cjeike…	0.210831	0.210831	1.53517	0.210831	0.210831	1.53517	258	0
ERS451417_01892	1717.62.peg.1891	NA	NA	NA	0.9989	17	Cargentoratense_DSM44202,"Cbelfantii_FRC0043","Ccallunae_DSM20147","Cdiphtheriae_NCTC11397","Cefficiens_YS314","Cepidermidicanis_DSM45586","Cglutamicum_ATCC13032","Ckroppenstedtii_DSM44385","Ckutscheri_DSM20755","Clactis_RW25","Cmustelae_DSM45274","Cpseudotuberculosis_31","Cpseudotuberculosis_ATCC19410","Csilvaticum_KL0182","Culcerans_NCTC12077","Culcerans_NCTC7910","Cvitaeruminis_DSM20294"	0.494888	0.157843	2.41809	0.277724	0.157833	2.41809	258	0
ERS451417_02222	1717.62.peg.2247	NA	NA	NA	0.9989	36	Cargentoratense_DSM44202,"Catypicum_R2070","Caurimucosum_ATCC700975","Cbelfantii_FRC0043","Ccallunae_DSM20147","Ccamporealensis_DSM44610","Cdeserti_GIMN1010","Cdiphtheriae_NCTC11397","Cdoosanense_DSM45436","Cefficiens_YS314","Cepidermidicanis_DSM45586","Cfalsenii_DSM44353","Cglutamicum_ATCC13032","Cglycinophilum_AJ3170","Chalotolerans_YIM70093","Chumireducens_DSM45392","Cimitans_DSM44264","Cjeike…	0.0879819	0.0879819	1.82631	0.0879819	0.0879819	1.82631	258	0
ERS451417_00256	1717.62.peg.251	NA	NA	NA	0.9989	39	Cargentoratense_DSM44202,"Catypicum_R2070","Caurimucosum_ATCC700975","Cbelfantii_FRC0043","Ccallunae_DSM20147","Ccamporealensis_DSM44610","Cdeserti_GIMN1010","Cdiphtheriae_NCTC11397","Cdoosanense_DSM45436","Cefficiens_YS314","Cepidermidicanis_DSM45586","Cfalsenii_DSM44353","Cglutamicum_ATCC13032","Cglycinophilum_AJ3170","Chalotolerans_YIM70093","Chumireducens_DSM45392","Cimitans_DSM44264","Cjeike…	0.132014	0.132014	1.77325	0.132014	0.132014	1.77325	258	0
ERS451417_01865	1717.62.peg.1867	NA	NA	NA	0.9989	38	Cargentoratense_DSM44202,"Catypicum_R2070","Caurimucosum_ATCC700975","Cbelfantii_FRC0043","Ccallunae_DSM20147","Ccamporealensis_DSM44610","Cdeserti_GIMN1010","Cdiphtheriae_NCTC11397","Cdoosanense_DSM45436","Cefficiens_YS314","Cepidermidicanis_DSM45586","Cfalsenii_DSM44353","Cglutamicum_ATCC13032","Cglycinophilum_AJ3170","Chalotolerans_YIM70093","Chumireducens_DSM45392","Cimitans_DSM44264","Cjeike…	0.0653431	0.0653431	1.40241	0.0653431	0.0653431	1.40241	1282	0
ERS451417_02320	1717.62.peg.2347	NA	NA	NA	0.9989	28	Cargentoratense_DSM44202,"Catypicum_R2070","Cbelfantii_FRC0043","Ccallunae_DSM20147","Cdeserti_GIMN1010","Cdiphtheriae_NCTC11397","Cdoosanense_DSM45436","Cefficiens_YS314","Cepidermidicanis_DSM45586","Cglutamicum_ATCC13032","Chalotolerans_YIM70093","Chumireducens_DSM45392","Cimitans_DSM44264","Cjeikeium_K41","Ckutscheri_DSM20755","Cmarinum_DSM44953","Cmaris_DSM45190","Cmustelae_DSM45274","Cpseudo…	0.159553	0.159544	1.64561	0.159995	0.159544	1.64561	1282	0
ERS451417_02017	1717.62.peg.2022	NA	NA	NA	0.9989	38	Cargentoratense_DSM44202,"Catypicum_R2070","Caurimucosum_ATCC700975","Cbelfantii_FRC0043","Ccallunae_DSM20147","Ccamporealensis_DSM44610","Cdeserti_GIMN1010","Cdiphtheriae_NCTC11397","Cdoosanense_DSM45436","Cefficiens_YS314","Cepidermidicanis_DSM45586","Cfalsenii_DSM44353","Cglutamicum_ATCC13032","Cglycinophilum_AJ3170","Chalotolerans_YIM70093","Chumireducens_DSM45392","Cimitans_DSM44264","Cjeike…	0.115966	0.115966	2.02032	0.115966	0.115966	2.02032	258	0
ERS451417_00566	1717.62.peg.569	NA	NA	NA	0.9989	6	Cbelfantii_FRC0043,"Cdiphtheriae_NCTC11397","Cpseudotuberculosis_31","Cpseudotuberculosis_ATCC19410","Crouxii_FRC0190","Csilvaticum_KL0182"	0.478987	0.478987	3.40585	0.596007	0.478977	3.40585	258	0
ERS451417_01995	1717.62.peg.1998	NA	NA	NA	0.9989	38	Cargentoratense_DSM44202,"Catypicum_R2070","Caurimucosum_ATCC700975","Cbelfantii_FRC0043","Ccallunae_DSM20147","Ccamporealensis_DSM44610","Cdeserti_GIMN1010","Cdiphtheriae_NCTC11397","Cdoosanense_DSM45436","Cefficiens_YS314","Cepidermidicanis_DSM45586","Cfalsenii_DSM44353","Cglutamicum_ATCC13032","Cglycinophilum_AJ3170","Chalotolerans_YIM70093","Chumireducens_DSM45392","Cimitans_DSM44264","Cjeike…	0.110589	0.110589	1.98756	0.110589	0.110589	1.98757	3330	0
ERS451417_01010	1717.62.peg.1021	NA	NA	NA	0.9989	39	Cargentoratense_DSM44202,"Catypicum_R2070","Caurimucosum_ATCC700975","Cbelfantii_FRC0043","Ccallunae_DSM20147","Ccamporealensis_DSM44610","Cdeserti_GIMN1010","Cdiphtheriae_NCTC11397","Cdoosanense_DSM45436","Cefficiens_YS314","Cepidermidicanis_DSM45586","Cfalsenii_DSM44353","Cglutamicum_ATCC13032","Cglycinophilum_AJ3170","Chalotolerans_YIM70093","Chumireducens_DSM45392","Cimitans_DSM44264","Cjeike…	0.201184	0.201184	1.88524	0.201184	0.201184	1.88524	258	0
ERS451417_00349	1717.62.peg.352	NA	NA	NA	0.9989	13	Cbelfantii_FRC0043,"Cdiphtheriae_NCTC11397","Cepidermidicanis_DSM45586","Ckroppenstedtii_DSM44385","Clactis_RW25","Cpseudotuberculosis_31","Cpseudotuberculosis_ATCC19410","Crouxii_FRC0190","Csilvaticum_KL0182","Csimulans_PES1","Ctestudinoris_DSM44614","Culcerans_NCTC12077","Culcerans_NCTC7910"	0.111449	0.111449	1.89179	0.111449	0.111449	1.89179	258	0
ERS451417_02226	1717.62.peg.2251	NA	NA	NA	0.9989	6	Cbelfantii_FRC0043,"Cdiphtheriae_NCTC11397","Cpseudotuberculosis_31","Cpseudotuberculosis_ATCC19410","Culcerans_NCTC12077","Culcerans_NCTC7910"	0.148691	0.148691	2.61824	0.153894	0.148691	2.61824	258	0
ERS451417_00645	1717.62.peg.649	NA	NA	NA	1	8	Cbelfantii_FRC0043,"Cdiphtheriae_NCTC11397","Ckutscheri_DSM20755","Cpseudotuberculosis_ATCC19410","Crouxii_FRC0190","Csilvaticum_KL0182","Culcerans_NCTC7910","Cvitaeruminis_DSM20294"	0.01305	0.01305	2.86053	0.01305	0.01305	2.86053	4354	0
ERS451417_02374	1717.62.peg.2404	NA	NA	NA	1	12	Cbelfantii_FRC0043,"Cdiphtheriae_NCTC11397","Cdoosanense_DSM45436","Chalotolerans_YIM70093","Chumireducens_DSM45392","Cmarinum_DSM44953","Cmaris_DSM45190","Cpseudotuberculosis_ATCC19410","Csilvaticum_KL0182","Culcerans_NCTC12077","Culcerans_NCTC7910","Cvitaeruminis_DSM20294"	0.195813	0.195813	2.10312	0.195813	0.195813	2.10313	7170	2	1. 0.45458;2. 13;3. 37;4. 28;5. 14;6. 40;7. 16;8. 46;9. 10;10. A;11. GCG	1. 0.52111;2. 45;3. 133;4. 60;5. 46;6. 136;7. 48;8. 142;9. 106;10. S;11. TCT
ERS451417_00467	1717.62.peg.471	NA	NA	NA	1	10	Cbelfantii_FRC0043,"Cdiphtheriae_NCTC11397","Ckutscheri_DSM20755","Cpseudotuberculosis_31","Cpseudotuberculosis_ATCC19410","Crouxii_FRC0190","Csilvaticum_KL0182","Culcerans_NCTC12077","Culcerans_NCTC7910","Cvitaeruminis_DSM20294"	0.0987386	0.0987386	1.81921	0.0987386	0.0987386	1.81921	258	0
ERS451417_01186	1717.62.peg.1195	NA	NA	NA	1	10	Cbelfantii_FRC0043,"Cdiphtheriae_NCTC11397","Cmustelae_DSM45274","Cpseudotuberculosis_31","Cpseudotuberculosis_ATCC19410","Crouxii_FRC0190","Csilvaticum_KL0182","Culcerans_NCTC12077","Culcerans_NCTC7910","Cvitaeruminis_DSM20294"	0.123748	0.123748	3.98983	0.123748	0.123748	3.98983	258	0
ERS451417_01348	1717.62.peg.1356	NA	NA	NA	1	38	Cargentoratense_DSM44202,"Catypicum_R2070","Caurimucosum_ATCC700975","Cbelfantii_FRC0043","Ccallunae_DSM20147","Ccamporealensis_DSM44610","Cdeserti_GIMN1010","Cdiphtheriae_NCTC11397","Cdoosanense_DSM45436","Cefficiens_YS314","Cepidermidicanis_DSM45586","Cfalsenii_DSM44353","Cglutamicum_ATCC13032","Cglycinophilum_AJ3170","Chalotolerans_YIM70093","Chumireducens_DSM45392","Cimitans_DSM44264","Cjeike…	1	0.179137	1.49508	0.996228	0.179118	1.49506	3072	1	1. 0.91105;2. 190;3. 568;4. 234;5. 234;6. 700;7. 343;8. 1027;9. 316;10. V;11. GTT
ERS451417_01883	1717.62.peg.1884	NA	NA	NA	1	35	Cargentoratense_DSM44202,"Catypicum_R2070","Caurimucosum_ATCC700975","Cbelfantii_FRC0043","Ccallunae_DSM20147","Ccamporealensis_DSM44610","Cdeserti_GIMN1010","Cdiphtheriae_NCTC11397","Cdoosanense_DSM45436","Cefficiens_YS314","Cepidermidicanis_DSM45586","Cfalsenii_DSM44353","Cglutamicum_ATCC13032","Chalotolerans_YIM70093","Chumireducens_DSM45392","Cimitans_DSM44264","Cjeikeium_K41","Ckroppenstedti…	0.160793	0.151229	1.87764	0.160793	0.151229	1.87764	2	1	1. 0.60424;2. 473;3. 1417;4. 514;5. 514;6. 1540;7. 534;8. 1600;9. 1258;10. T;11. ACT
ERS451417_00772	1717.62.peg.777	NA	NA	NA	1	11	Cbelfantii_FRC0043,"Cdiphtheriae_NCTC11397","Cefficiens_YS314","Cmustelae_DSM45274","Cpseudotuberculosis_31","Cpseudotuberculosis_ATCC19410","Crouxii_FRC0190","Csilvaticum_KL0182","Culcerans_NCTC12077","Culcerans_NCTC7910","Cvitaeruminis_DSM20294"	0.165163	0.165163	2.58451	0.165163	0.165163	2.58453	258	0
ERS451417_01549	1717.62.peg.1558	NA	NA	NA	1	23	Cargentoratense_DSM44202,"Caurimucosum_ATCC700975","Cbelfantii_FRC0043","Ccallunae_DSM20147","Ccamporealensis_DSM44610","Cdeserti_GIMN1010","Cdiphtheriae_NCTC11397","Cefficiens_YS314","Cglutamicum_ATCC13032","Chalotolerans_YIM70093","Chumireducens_DSM45392","Ckutscheri_DSM20755","Cmarinum_DSM44953","Cpseudotuberculosis_31","Cpseudotuberculosis_ATCC19410","Csilvaticum_KL0182","Csimulans_PES1","Csi…	0.202805	0.128093	1.63855	0.226083	0.127841	1.6425	2050	2	1. 0.81788;2. 169;3. 505;4. 210;5. 210;6. 628;7. 222;8. 664;9. 364;10. D;11. GAT	1. 0.82391;2. 183;3. 547;4. 224;5. 224;6. 670;7. 236;8. 706;9. 406;10. D;11. GAC
ERS451417_01651	1717.62.peg.1658	NA	NA	NA	1	37	Cargentoratense_DSM44202,"Catypicum_R2070","Caurimucosum_ATCC700975","Cbelfantii_FRC0043","Ccallunae_DSM20147","Ccamporealensis_DSM44610","Cdeserti_GIMN1010","Cdiphtheriae_NCTC11397","Cdoosanense_DSM45436","Cepidermidicanis_DSM45586","Cfalsenii_DSM44353","Cglutamicum_ATCC13032","Cglycinophilum_AJ3170","Chalotolerans_YIM70093","Chumireducens_DSM45392","Cimitans_DSM44264","Cjeikeium_K41","Ckroppens…	2.71094	0.178025	1.56731	0.999925	0.178025	1.56731	2304	0
ERS451417_00996	1717.62.peg.1007	NA	NA	NA	1	13	Cargentoratense_DSM44202,"Cbelfantii_FRC0043","Cdiphtheriae_NCTC11397","Cepidermidicanis_DSM45586","Ckroppenstedtii_DSM44385","Ckutscheri_DSM20755","Clactis_RW25","Cmustelae_DSM45274","Cpseudotuberculosis_31","Cpseudotuberculosis_ATCC19410","Crouxii_FRC0190","Culcerans_NCTC12077","Culcerans_NCTC7910"	0.158536	0.156882	2.39155	0.158498	0.156882	2.39155	3330	0
ERS451417_00718	1717.62.peg.723	NA	NA	NA	1	29	Cargentoratense_DSM44202,"Caurimucosum_ATCC700975","Cbelfantii_FRC0043","Ccallunae_DSM20147","Ccamporealensis_DSM44610","Cdeserti_GIMN1010","Cdiphtheriae_NCTC11397","Cdoosanense_DSM45436","Cefficiens_YS314","Cepidermidicanis_DSM45586","Cglutamicum_ATCC13032","Chalotolerans_YIM70093","Chumireducens_DSM45392","Cimitans_DSM44264","Cmarinum_DSM44953","Cmaris_DSM45190","Cmustelae_DSM45274","Cpseudotub…	0.633853	0.283196	1.72486	0.412269	0.283205	1.72486	2306	0
ERS451417_00590	1717.62.peg.593	NA	NA	NA	1	14	Cbelfantii_FRC0043,"Ccallunae_DSM20147","Cdeserti_GIMN1010","Cdiphtheriae_NCTC11397","Cefficiens_YS314","Cglutamicum_ATCC13032","Chalotolerans_YIM70093","Cmustelae_DSM45274","Cpseudotuberculosis_ATCC19410","Crouxii_FRC0190","Csilvaticum_KL0182","Culcerans_NCTC12077","Culcerans_NCTC7910","Cvitaeruminis_DSM20294"	0.0727111	0.0727111	2.20081	0.0727111	0.0727111	2.20081	4354	0
ERS451417_02203	1717.62.peg.2229	NA	NA	NA	1	21	Catypicum_R2070,"Caurimucosum_ATCC700975","Cbelfantii_FRC0043","Ccallunae_DSM20147","Ccamporealensis_DSM44610","Cdeserti_GIMN1010","Cdiphtheriae_NCTC11397","Cdoosanense_DSM45436","Cepidermidicanis_DSM45586","Cglutamicum_ATCC13032","Chalotolerans_YIM70093","Ckutscheri_DSM20755","Cmaris_DSM45190","Cpseudotuberculosis_31","Cpseudotuberculosis_ATCC19410","Csilvaticum_KL0182","Csimulans_PES1","Csingul…	0.111504	0.111494	2.00442	0.111504	0.111494	2.00442	258	0
ERS451417_00208	1717.62.peg.205	NA	NA	NA	1	37	Cargentoratense_DSM44202,"Catypicum_R2070","Caurimucosum_ATCC700975","Cbelfantii_FRC0043","Ccallunae_DSM20147","Ccamporealensis_DSM44610","Cdeserti_GIMN1010","Cdiphtheriae_NCTC11397","Cdoosanense_DSM45436","Cefficiens_YS314","Cepidermidicanis_DSM45586","Cfalsenii_DSM44353","Cglutamicum_ATCC13032","Cglycinophilum_AJ3170","Chalotolerans_YIM70093","Chumireducens_DSM45392","Cimitans_DSM44264","Cjeike…	0.145366	0.145366	1.72383	0.145366	0.145366	1.72383	1282	0
ERS451417_00215	1717.62.peg.212	NA	NA	NA	1	11	Cbelfantii_FRC0043,"Ccallunae_DSM20147","Cdiphtheriae_NCTC11397","Ckutscheri_DSM20755","Cmustelae_DSM45274","Cpseudotuberculosis_ATCC19410","Crouxii_FRC0190","Csilvaticum_KL0182","Culcerans_NCTC12077","Culcerans_NCTC7910","Cvitaeruminis_DSM20294"	0.0761721	0.0761721	2.36404	0.118671	0.0739595	2.39383	4098	1	1. 0.44245;2. 84;3. 250;4. 114;5. 85;6. 253;7. 85;8. 253;9. 250;10. V;11. GTT
ERS451417_01948	1717.62.peg.1948	NA	NA	NA	1	38	Cargentoratense_DSM44202,"Catypicum_R2070","Caurimucosum_ATCC700975","Cbelfantii_FRC0043","Ccallunae_DSM20147","Ccamporealensis_DSM44610","Cdeserti_GIMN1010","Cdiphtheriae_NCTC11397","Cdoosanense_DSM45436","Cefficiens_YS314","Cepidermidicanis_DSM45586","Cfalsenii_DSM44353","Cglutamicum_ATCC13032","Cglycinophilum_AJ3170","Chalotolerans_YIM70093","Chumireducens_DSM45392","Cimitans_DSM44264","Cjeike…	0.149578	0.149578	1.57413	0.149578	0.149578	1.57413	3330	0
ERS451417_00826	1717.62.peg.830	NA	NA	NA	1	14	Cbelfantii_FRC0043,"Ccallunae_DSM20147","Cdeserti_GIMN1010","Cdiphtheriae_NCTC11397","Cefficiens_YS314","Cglutamicum_ATCC13032","Ckutscheri_DSM20755","Cmustelae_DSM45274","Cpseudotuberculosis_31","Cpseudotuberculosis_ATCC19410","Crouxii_FRC0190","Csilvaticum_KL0182","Culcerans_NCTC12077","Culcerans_NCTC7910"	0.160245	0.160245	2.14047	0.160245	0.160245	2.14047	3330	0
ERS451417_00294	1717.62.peg.295	NA	NA	NA	1	39	Cargentoratense_DSM44202,"Catypicum_R2070","Caurimucosum_ATCC700975","Cbelfantii_FRC0043","Ccallunae_DSM20147","Ccamporealensis_DSM44610","Cdeserti_GIMN1010","Cdiphtheriae_NCTC11397","Cdoosanense_DSM45436","Cefficiens_YS314","Cepidermidicanis_DSM45586","Cfalsenii_DSM44353","Cglutamicum_ATCC13032","Cglycinophilum_AJ3170","Chalotolerans_YIM70093","Chumireducens_DSM45392","Cimitans_DSM44264","Cjeike…	0.13933	0.13933	1.67232	0.13933	0.13933	1.67232	258	0
ERS451417_02143	1717.62.peg.2165	NA	NA	NA	1	38	Cargentoratense_DSM44202,"Catypicum_R2070","Caurimucosum_ATCC700975","Cbelfantii_FRC0043","Ccallunae_DSM20147","Ccamporealensis_DSM44610","Cdeserti_GIMN1010","Cdiphtheriae_NCTC11397","Cdoosanense_DSM45436","Cefficiens_YS314","Cepidermidicanis_DSM45586","Cfalsenii_DSM44353","Cglutamicum_ATCC13032","Cglycinophilum_AJ3170","Chalotolerans_YIM70093","Chumireducens_DSM45392","Cimitans_DSM44264","Cjeike…	0.235067	0.115033	1.55971	0.235067	0.115033	1.55971	3074	1	1. 0.85215;2. 239;3. 715;4. 287;5. 287;6. 859;7. 379;8. 1135;9. 487;10. R;11. CGC
ERS451417_01458	1717.62.peg.1468	NA	NA	NA	1	35	Cargentoratense_DSM44202,"Catypicum_R2070","Caurimucosum_ATCC700975","Cbelfantii_FRC0043","Ccallunae_DSM20147","Ccamporealensis_DSM44610","Cdeserti_GIMN1010","Cdiphtheriae_NCTC11397","Cdoosanense_DSM45436","Cefficiens_YS314","Cepidermidicanis_DSM45586","Cglutamicum_ATCC13032","Cglycinophilum_AJ3170","Chalotolerans_YIM70093","Chumireducens_DSM45392","Cimitans_DSM44264","Ckroppenstedtii_DSM44385","…	0.198182	0.0549619	1.22586	0.110712	0.0551294	1.25269	258	0
ERS451417_02124	1717.62.peg.2139	NA	NA	NA	1	7	Cbelfantii_FRC0043,"Cdiphtheriae_NCTC11397","Cpseudotuberculosis_31","Cpseudotuberculosis_ATCC19410","Csilvaticum_KL0182","Culcerans_NCTC12077","Culcerans_NCTC7910"	0.999829	0.0833437	3.1299	0.0836116	0.0836116	3.12085	256	0
ERS451417_00317	1717.62.peg.319	NA	NA	NA	1	39	Cargentoratense_DSM44202,"Catypicum_R2070","Caurimucosum_ATCC700975","Cbelfantii_FRC0043","Ccallunae_DSM20147","Ccamporealensis_DSM44610","Cdeserti_GIMN1010","Cdiphtheriae_NCTC11397","Cdoosanense_DSM45436","Cefficiens_YS314","Cepidermidicanis_DSM45586","Cfalsenii_DSM44353","Cglutamicum_ATCC13032","Cglycinophilum_AJ3170","Chalotolerans_YIM70093","Chumireducens_DSM45392","Cimitans_DSM44264","Cjeike…	0.174083	0.174083	1.5986	0.174083	0.174083	1.5986	3330	0
ERS451417_01331	1717.62.peg.1339	NA	NA	NA	1	38	Cargentoratense_DSM44202,"Catypicum_R2070","Caurimucosum_ATCC700975","Cbelfantii_FRC0043","Ccallunae_DSM20147","Ccamporealensis_DSM44610","Cdeserti_GIMN1010","Cdiphtheriae_NCTC11397","Cdoosanense_DSM45436","Cefficiens_YS314","Cepidermidicanis_DSM45586","Cfalsenii_DSM44353","Cglutamicum_ATCC13032","Cglycinophilum_AJ3170","Chalotolerans_YIM70093","Chumireducens_DSM45392","Cimitans_DSM44264","Cjeike…	0.184588	0.121432	1.7721	0.184598	0.121432	1.7721	2	1	1. 0.80109;2. 195;3. 583;4. 195;5. 195;6. 583;7. 195;8. 583;9. 574;10. R;11. CGA
ERS451417_01308	1717.62.peg.1316	NA	NA	NA	1	38	Cargentoratense_DSM44202,"Catypicum_R2070","Caurimucosum_ATCC700975","Cbelfantii_FRC0043","Ccallunae_DSM20147","Ccamporealensis_DSM44610","Cdeserti_GIMN1010","Cdiphtheriae_NCTC11397","Cdoosanense_DSM45436","Cefficiens_YS314","Cepidermidicanis_DSM45586","Cfalsenii_DSM44353","Cglutamicum_ATCC13032","Cglycinophilum_AJ3170","Chalotolerans_YIM70093","Chumireducens_DSM45392","Cimitans_DSM44264","Cjeike…	0.182421	0.146888	1.58982	0.182402	0.146888	1.58982	2	1	1. 0.46377;2. 108;3. 322;4. 121;5. 121;6. 361;7. 134;8. 400;9. 316;10. G;11. GGC
ERS451417_00029	1717.62.peg.26	NA	NA	NA	1	39	Cargentoratense_DSM44202,"Catypicum_R2070","Caurimucosum_ATCC700975","Cbelfantii_FRC0043","Ccallunae_DSM20147","Ccamporealensis_DSM44610","Cdeserti_GIMN1010","Cdiphtheriae_NCTC11397","Cdoosanense_DSM45436","Cefficiens_YS314","Cepidermidicanis_DSM45586","Cfalsenii_DSM44353","Cglutamicum_ATCC13032","Cglycinophilum_AJ3170","Chalotolerans_YIM70093","Chumireducens_DSM45392","Cimitans_DSM44264","Cjeike…	0.309309	0.234301	2.05407	0.309299	0.234291	2.05406	2	1	1. 0.75788;2. 43;3. 127;4. 53;5. 53;6. 157;7. 73;8. 217;9. 79;10. A;11. GCA
ERS451417_01823	1717.62.peg.1828	NA	NA	NA	1	6	Cbelfantii_FRC0043,"Cdiphtheriae_NCTC11397","Cpseudotuberculosis_ATCC19410","Csilvaticum_KL0182","Culcerans_NCTC12077","Culcerans_NCTC7910"	0.304548	0.304548	4.32953	0.304548	0.304548	4.32955	4354	0
ERS451417_01357	1717.62.peg.1365	NA	NA	NA	1	17	Catypicum_R2070,"Cbelfantii_FRC0043","Cdiphtheriae_NCTC11397","Cdoosanense_DSM45436","Cepidermidicanis_DSM45586","Cglutamicum_ATCC13032","Chalotolerans_YIM70093","Chumireducens_DSM45392","Cimitans_DSM44264","Cmustelae_DSM45274","Cpseudotuberculosis_31","Cpseudotuberculosis_ATCC19410","Csilvaticum_KL0182","Ctestudinoris_DSM44614","Culcerans_NCTC12077","Culcerans_NCTC7910","Cvitaeruminis_DSM20294"	0.280606	0.280606	1.83178	0.280606	0.280606	1.83178	3330	0
ERS451417_00005	1717.62.peg.6	NA	NA	NA	1	39	Cargentoratense_DSM44202,"Catypicum_R2070","Caurimucosum_ATCC700975","Cbelfantii_FRC0043","Ccallunae_DSM20147","Ccamporealensis_DSM44610","Cdeserti_GIMN1010","Cdiphtheriae_NCTC11397","Cdoosanense_DSM45436","Cefficiens_YS314","Cepidermidicanis_DSM45586","Cfalsenii_DSM44353","Cglutamicum_ATCC13032","Cglycinophilum_AJ3170","Chalotolerans_YIM70093","Chumireducens_DSM45392","Cimitans_DSM44264","Cjeike…	0.122071	0.122071	1.93327	0.122071	0.122071	1.93328	258	0
ERS451417_00872	1717.62.peg.878	NA	NA	NA	1	39	Cargentoratense_DSM44202,"Catypicum_R2070","Caurimucosum_ATCC700975","Cbelfantii_FRC0043","Ccallunae_DSM20147","Ccamporealensis_DSM44610","Cdeserti_GIMN1010","Cdiphtheriae_NCTC11397","Cdoosanense_DSM45436","Cefficiens_YS314","Cepidermidicanis_DSM45586","Cfalsenii_DSM44353","Cglutamicum_ATCC13032","Cglycinophilum_AJ3170","Chalotolerans_YIM70093","Chumireducens_DSM45392","Cimitans_DSM44264","Cjeike…	0.135525	0.135525	1.92009	0.135525	0.135525	1.92009	258	0
ERS451417_00131	1717.62.peg.130	NA	NA	NA	1	8	Cbelfantii_FRC0043,"Cdiphtheriae_NCTC11397","Cpseudotuberculosis_31","Cpseudotuberculosis_ATCC19410","Crouxii_FRC0190","Csilvaticum_KL0182","Culcerans_NCTC12077","Culcerans_NCTC7910"	0.334453	0.334453	5.26145	0.334453	0.334453	5.26146	258	0
ERS451417_02120	1717.62.peg.2135	NA	NA	NA	1	36	Cargentoratense_DSM44202,"Catypicum_R2070","Caurimucosum_ATCC700975","Cbelfantii_FRC0043","Ccallunae_DSM20147","Ccamporealensis_DSM44610","Cdeserti_GIMN1010","Cdiphtheriae_NCTC11397","Cdoosanense_DSM45436","Cefficiens_YS314","Cepidermidicanis_DSM45586","Cfalsenii_DSM44353","Cglutamicum_ATCC13032","Cglycinophilum_AJ3170","Chalotolerans_YIM70093","Chumireducens_DSM45392","Cimitans_DSM44264","Cjeike…	0.127168	0.127168	1.78105	0.127168	0.127168	1.78105	258	0
ERS451417_01504	1717.62.peg.1512	NA	NA	NA	1	38	Cargentoratense_DSM44202,"Catypicum_R2070","Caurimucosum_ATCC700975","Cbelfantii_FRC0043","Ccallunae_DSM20147","Ccamporealensis_DSM44610","Cdeserti_GIMN1010","Cdiphtheriae_NCTC11397","Cdoosanense_DSM45436","Cefficiens_YS314","Cepidermidicanis_DSM45586","Cfalsenii_DSM44353","Cglutamicum_ATCC13032","Cglycinophilum_AJ3170","Chalotolerans_YIM70093","Chumireducens_DSM45392","Cimitans_DSM44264","Cjeike…	0.421583	0.170171	1.7607	0.421583	0.170171	1.7607	2	1	1. 0.82373;2. 165;3. 493;4. 172;5. 172;6. 514;7. 187;8. 559;9. 391;10. D;11. GAT
ERS451417_01189	1717.62.peg.1198	NA	NA	NA	1	24	Cargentoratense_DSM44202,"Cbelfantii_FRC0043","Cdiphtheriae_NCTC11397","Cefficiens_YS314","Cepidermidicanis_DSM45586","Cfalsenii_DSM44353","Cglutamicum_ATCC13032","Cglycinophilum_AJ3170","Chumireducens_DSM45392","Cimitans_DSM44264","Ckroppenstedtii_DSM44385","Ckutscheri_DSM20755","Clactis_RW25","Cpseudotuberculosis_31","Cpseudotuberculosis_ATCC19410","CriegeliiPUDD83A45","Crouxii_FRC0190","Csilva…	0.485851	0.255108	1.6861	0.485856	0.255116	1.6861	3074	3	1. 0.8542;2. 39;3. 115;4. 68;5. 68;6. 202;7. 132;8. 394;9. 10;10. T;11. ACT	1. 0.84055;2. 318;3. 952;4. 377;5. 377;6. 1129;7. 448;8. 1342;9. 652;10. M;11. ATG	1. 0.84055;2. 407;3. 1219;4. 473;5. 473;6. 1417;7. 548;8. 1642;9. 856;10. M;11. ATG
ERS451417_00969	1717.62.peg.977	NA	NA	NA	1	13	Caurimucosum_ATCC700975,"Cbelfantii_FRC0043","Cdiphtheriae_NCTC11397","Cepidermidicanis_DSM45586","Ckutscheri_DSM20755","Clactis_RW25","Cpseudotuberculosis_31","Cpseudotuberculosis_ATCC19410","Crouxii_FRC0190","Csilvaticum_KL0182","Ctestudinoris_DSM44614","Culcerans_NCTC12077","Culcerans_NCTC7910"	0.208992	0.208992	2.59384	0.208992	0.208992	2.59384	2306	0
ERS451417_00672	1717.62.peg.679	NA	NA	NA	1	15	Cargentoratense_DSM44202,"Cbelfantii_FRC0043","Cdiphtheriae_NCTC11397","Cefficiens_YS314","Cepidermidicanis_DSM45586","Ckutscheri_DSM20755","Clactis_RW25","Cmustelae_DSM45274","Cpseudotuberculosis_31","Cpseudotuberculosis_ATCC19410","Crouxii_FRC0190","Csilvaticum_KL0182","Culcerans_NCTC12077","Culcerans_NCTC7910","Cvitaeruminis_DSM20294"	0.21193	0.21193	2.17225	0.21193	0.21193	2.17225	258	0
ERS451417_02224	1717.62.peg.2249	NA	NA	NA	1	36	Cargentoratense_DSM44202,"Catypicum_R2070","Caurimucosum_ATCC700975","Cbelfantii_FRC0043","Ccallunae_DSM20147","Ccamporealensis_DSM44610","Cdeserti_GIMN1010","Cdiphtheriae_NCTC11397","Cdoosanense_DSM45436","Cefficiens_YS314","Cepidermidicanis_DSM45586","Cfalsenii_DSM44353","Cglutamicum_ATCC13032","Cglycinophilum_AJ3170","Chalotolerans_YIM70093","Chumireducens_DSM45392","Cimitans_DSM44264","Cjeike…	0.277676	0.234074	1.59568	0.277676	0.234074	1.59568	2	1	1. 0.82441;2. 500;3. 1498;4. 566;5. 566;6. 1696;7. 633;8. 1897;9. 1198;10. A;11. GCG
ERS451417_02052	1717.62.peg.2064	NA	NA	NA	1	15	Cbelfantii_FRC0043,"Ccallunae_DSM20147","Cdeserti_GIMN1010","Cdiphtheriae_NCTC11397","Cefficiens_YS314","Cglutamicum_ATCC13032","Chalotolerans_YIM70093","Cmustelae_DSM45274","Cpseudotuberculosis_31","Cpseudotuberculosis_ATCC19410","Csilvaticum_KL0182","Ctestudinoris_DSM44614","Culcerans_NCTC12077","Culcerans_NCTC7910","Cvitaeruminis_DSM20294"	0.0791164	0.0791164	1.70838	0.0791164	0.0791164	1.70838	258	0
ERS451417_00143	1717.62.peg.142	NA	NA	NA	1	39	Cargentoratense_DSM44202,"Catypicum_R2070","Caurimucosum_ATCC700975","Cbelfantii_FRC0043","Ccallunae_DSM20147","Ccamporealensis_DSM44610","Cdeserti_GIMN1010","Cdiphtheriae_NCTC11397","Cdoosanense_DSM45436","Cefficiens_YS314","Cepidermidicanis_DSM45586","Cfalsenii_DSM44353","Cglutamicum_ATCC13032","Cglycinophilum_AJ3170","Chalotolerans_YIM70093","Chumireducens_DSM45392","Cimitans_DSM44264","Cjeike…	0.241051	0.131037	1.69175	0.241051	0.131037	1.69175	1026	2	1. 0.80817;2. 56;3. 166;4. 82;5. 82;6. 244;7. 144;8. 430;9. 94;10. E;11. GAG	1. 0.81093;2. 290;3. 868;4. 354;5. 354;6. 1060;7. 428;8. 1282;9. 700;10. L;11. CTC
ERS451417_00759	1717.62.peg.764	NA	NA	NA	1	36	Cargentoratense_DSM44202,"Caurimucosum_ATCC700975","Cbelfantii_FRC0043","Ccallunae_DSM20147","Ccamporealensis_DSM44610","Cdeserti_GIMN1010","Cdiphtheriae_NCTC11397","Cdoosanense_DSM45436","Cefficiens_YS314","Cepidermidicanis_DSM45586","Cfalsenii_DSM44353","Cglutamicum_ATCC13032","Cglycinophilum_AJ3170","Chalotolerans_YIM70093","Chumireducens_DSM45392","Cimitans_DSM44264","Cjeikeium_K41","Ckutsche…	0.537337	0.142299	1.78418	0.253477	0.142299	1.78418	3330	0
ERS451417_00199	1717.62.peg.196	NA	NA	NA	1	39	Cargentoratense_DSM44202,"Catypicum_R2070","Caurimucosum_ATCC700975","Cbelfantii_FRC0043","Ccallunae_DSM20147","Ccamporealensis_DSM44610","Cdeserti_GIMN1010","Cdiphtheriae_NCTC11397","Cdoosanense_DSM45436","Cefficiens_YS314","Cepidermidicanis_DSM45586","Cfalsenii_DSM44353","Cglutamicum_ATCC13032","Cglycinophilum_AJ3170","Chalotolerans_YIM70093","Chumireducens_DSM45392","Cimitans_DSM44264","Cjeike…	1.83691	0.118864	2.06567	0.118854	0.118854	2.06443	256	0
ERS451417_01989	1717.62.peg.1990	NA	NA	NA	1	7	Cbelfantii_FRC0043,"Cdiphtheriae_NCTC11397","Cpseudotuberculosis_31","Cpseudotuberculosis_ATCC19410","Csilvaticum_KL0182","Culcerans_NCTC12077","Culcerans_NCTC7910"	0.0936937	0.0936937	3.25252	0.0936937	0.0936937	3.25252	258	0
ERS451417_01760	1717.62.peg.1763	NA	NA	NA	1	29	Cargentoratense_DSM44202,"Caurimucosum_ATCC700975","Cbelfantii_FRC0043","Ccallunae_DSM20147","Ccamporealensis_DSM44610","Cdeserti_GIMN1010","Cdiphtheriae_NCTC11397","Cdoosanense_DSM45436","Cefficiens_YS314","Cepidermidicanis_DSM45586","Cglutamicum_ATCC13032","Chalotolerans_YIM70093","Chumireducens_DSM45392","Cimitans_DSM44264","Ckutscheri_DSM20755","Cmarinum_DSM44953","Cmaris_DSM45190","Cmustelae…	0.0946561	0.0946561	1.69553	0.0946561	0.0946561	1.69554	7170	1	1. 0.5487;2. 142;3. 424;4. 192;5. 160;6. 478;7. 201;8. 601;9. 310;10. S;11. AGT
ERS451417_01295	1717.62.peg.1303	NA	NA	NA	1	38	Cargentoratense_DSM44202,"Catypicum_R2070","Caurimucosum_ATCC700975","Cbelfantii_FRC0043","Ccallunae_DSM20147","Ccamporealensis_DSM44610","Cdeserti_GIMN1010","Cdiphtheriae_NCTC11397","Cdoosanense_DSM45436","Cefficiens_YS314","Cepidermidicanis_DSM45586","Cfalsenii_DSM44353","Cglutamicum_ATCC13032","Cglycinophilum_AJ3170","Chalotolerans_YIM70093","Chumireducens_DSM45392","Cimitans_DSM44264","Cjeike…	0.139473	0.076432	1.62496	0.139483	0.0764323	1.62496	2	1	1. 0.72057;2. 432;3. 1294;4. 444;5. 444;6. 1330;7. 507;8. 1519;9. 1210;10. E;11. GAG
ERS451417_01977	1717.62.peg.1977	NA	NA	NA	1	38	Cargentoratense_DSM44202,"Catypicum_R2070","Caurimucosum_ATCC700975","Cbelfantii_FRC0043","Ccallunae_DSM20147","Ccamporealensis_DSM44610","Cdeserti_GIMN1010","Cdiphtheriae_NCTC11397","Cdoosanense_DSM45436","Cefficiens_YS314","Cepidermidicanis_DSM45586","Cfalsenii_DSM44353","Cglutamicum_ATCC13032","Cglycinophilum_AJ3170","Chalotolerans_YIM70093","Chumireducens_DSM45392","Cimitans_DSM44264","Cjeike…	0.335094	0.101116	2.20184	0.203587	0.101115	2.20185	3330	0
ERS451417_00309	1717.62.peg.310	NA	NA	NA	1	27	Cargentoratense_DSM44202,"Catypicum_R2070","Cbelfantii_FRC0043","Ccallunae_DSM20147","Cdeserti_GIMN1010","Cdiphtheriae_NCTC11397","Cdoosanense_DSM45436","Cefficiens_YS314","Cfalsenii_DSM44353","Cglutamicum_ATCC13032","Cglycinophilum_AJ3170","Chumireducens_DSM45392","Cjeikeium_K41","Ckutscheri_DSM20755","Clactis_RW25","Cmarinum_DSM44953","Cmaris_DSM45190","Cmustelae_DSM45274","Cpseudotuberculosis_…	0.148898	0.134584	1.87386	0.148898	0.134584	1.87386	2	1	1. 0.77137;2. 214;3. 640;4. 264;5. 264;6. 790;7. 287;8. 859;9. 562;10. K;11. AAA
ERS451417_02277	1717.62.peg.2306	NA	NA	NA	1	36	Cargentoratense_DSM44202,"Catypicum_R2070","Caurimucosum_ATCC700975","Cbelfantii_FRC0043","Ccallunae_DSM20147","Ccamporealensis_DSM44610","Cdeserti_GIMN1010","Cdiphtheriae_NCTC11397","Cdoosanense_DSM45436","Cefficiens_YS314","Cepidermidicanis_DSM45586","Cfalsenii_DSM44353","Cglutamicum_ATCC13032","Cglycinophilum_AJ3170","Chalotolerans_YIM70093","Chumireducens_DSM45392","Cimitans_DSM44264","Cjeike…	0.112626	0.112626	1.89282	0.112626	0.112626	1.89282	258	0
ERS451417_00732	1717.62.peg.735	NA	NA	NA	1	39	Cargentoratense_DSM44202,"Catypicum_R2070","Caurimucosum_ATCC700975","Cbelfantii_FRC0043","Ccallunae_DSM20147","Ccamporealensis_DSM44610","Cdeserti_GIMN1010","Cdiphtheriae_NCTC11397","Cdoosanense_DSM45436","Cefficiens_YS314","Cepidermidicanis_DSM45586","Cfalsenii_DSM44353","Cglutamicum_ATCC13032","Cglycinophilum_AJ3170","Chalotolerans_YIM70093","Chumireducens_DSM45392","Cimitans_DSM44264","Cjeike…	0.177882	0.177882	1.71981	0.177882	0.177882	1.71981	258	0
ERS451417_01962	1717.62.peg.1962	NA	NA	NA	1	16	Catypicum_R2070,"Caurimucosum_ATCC700975","Cbelfantii_FRC0043","Ccallunae_DSM20147","Cdeserti_GIMN1010","Cdiphtheriae_NCTC11397","Cefficiens_YS314","Cglutamicum_ATCC13032","Cglycinophilum_AJ3170","Ckutscheri_DSM20755","Cpseudotuberculosis_31","Cpseudotuberculosis_ATCC19410","Csingulare_IBSB52218","Culcerans_NCTC12077","Culcerans_NCTC7910","Cvitaeruminis_DSM20294"	0.245513	0.124032	2.55202	0.245513	0.124032	2.55202	2050	2	1. 0.81069;2. 47;3. 139;4. 91;5. 87;6. 259;7. 101;8. 301;9. 103;10. D;11. GAT	1. 0.81837;2. 181;3. 541;4. 231;5. 221;6. 661;7. 235;8. 703;9. 463;10. F;11. TTT
ERS451417_02323	1717.62.peg.2350	NA	NA	NA	1	18	Catypicum_R2070,"Cbelfantii_FRC0043","Ccallunae_DSM20147","Cdiphtheriae_NCTC11397","Chalotolerans_YIM70093","Chumireducens_DSM45392","Ckutscheri_DSM20755","Cmarinum_DSM44953","Cmustelae_DSM45274","Cpseudotuberculosis_31","Cpseudotuberculosis_ATCC19410","CriegeliiPUDD83A45","Csilvaticum_KL0182","Ctestudinoris_DSM44614","Culcerans_NCTC12077","Culcerans_NCTC7910","Cureicelerivorans_IMMIBRIV2301","Cv…	0.573792	0.301974	1.32826	0.410084	0.301974	1.32826	3330	0
ERS451417_01009	1717.62.peg.1020	NA	NA	NA	1	39	Cargentoratense_DSM44202,"Catypicum_R2070","Caurimucosum_ATCC700975","Cbelfantii_FRC0043","Ccallunae_DSM20147","Ccamporealensis_DSM44610","Cdeserti_GIMN1010","Cdiphtheriae_NCTC11397","Cdoosanense_DSM45436","Cefficiens_YS314","Cepidermidicanis_DSM45586","Cfalsenii_DSM44353","Cglutamicum_ATCC13032","Cglycinophilum_AJ3170","Chalotolerans_YIM70093","Chumireducens_DSM45392","Cimitans_DSM44264","Cjeike…	0.113809	0.113809	1.44042	0.113809	0.113809	1.44041	258	0
ERS451417_00588	1717.62.peg.592	NA	NA	NA	1	31	Cargentoratense_DSM44202,"Catypicum_R2070","Caurimucosum_ATCC700975","Cbelfantii_FRC0043","Ccallunae_DSM20147","Ccamporealensis_DSM44610","Cdeserti_GIMN1010","Cdiphtheriae_NCTC11397","Cdoosanense_DSM45436","Cefficiens_YS314","Cglutamicum_ATCC13032","Chalotolerans_YIM70093","Chumireducens_DSM45392","Cimitans_DSM44264","Ckutscheri_DSM20755","Cmarinum_DSM44953","Cmaris_DSM45190","Cmustelae_DSM45274"…	0.642144	0.305256	1.63773	0.642144	0.305256	1.63773	1026	1	1. 0.89579;2. 8;3. 22;4. 60;5. 38;6. 112;7. 90;8. 268;9. 4;10. V;11. GTT
ERS451417_00804	1717.62.peg.811	NA	NA	NA	1	39	Cargentoratense_DSM44202,"Catypicum_R2070","Caurimucosum_ATCC700975","Cbelfantii_FRC0043","Ccallunae_DSM20147","Ccamporealensis_DSM44610","Cdeserti_GIMN1010","Cdiphtheriae_NCTC11397","Cdoosanense_DSM45436","Cefficiens_YS314","Cepidermidicanis_DSM45586","Cfalsenii_DSM44353","Cglutamicum_ATCC13032","Cglycinophilum_AJ3170","Chalotolerans_YIM70093","Chumireducens_DSM45392","Cimitans_DSM44264","Cjeike…	0.345313	0.204233	1.78158	0.345332	0.204223	1.78158	3074	1	1. 0.83004;2. 265;3. 793;4. 296;5. 296;6. 886;7. 379;8. 1135;9. 481;10. I;11. ATC
ERS451417_00158	1717.62.peg.156	NA	NA	NA	1	12	Cdiphtheriae_NCTC11397,"Cmustelae_DSM45274","Cpseudotuberculosis_31","Cpseudotuberculosis_ATCC19410","Crouxii_FRC0190","Csilvaticum_KL0182","Csimulans_PES1","Csingulare_IBSB52218","Culcerans_NCTC12077","Culcerans_NCTC7910","Curealyticum_DSM7109","Cvitaeruminis_DSM20294"	0.327706	0.204633	2.28038	0.327706	0.204633	2.28038	3074	1	1. 0.81346;2. 120;3. 358;4. 138;5. 126;6. 376;7. 172;8. 514;9. 250;10. I;11. ATT
ERS451417_01273	1717.62.peg.1281	NA	NA	NA	1	17	Cargentoratense_DSM44202,"Cbelfantii_FRC0043","Cdiphtheriae_NCTC11397","Cefficiens_YS314","Cepidermidicanis_DSM45586","Cglutamicum_ATCC13032","Ckroppenstedtii_DSM44385","Ckutscheri_DSM20755","Clactis_RW25","Cmustelae_DSM45274","Cpseudotuberculosis_31","Cpseudotuberculosis_ATCC19410","Crouxii_FRC0190","Csilvaticum_KL0182","Culcerans_NCTC12077","Culcerans_NCTC7910","Cvitaeruminis_DSM20294"	0.0973196	0.0973196	2.21868	0.0973098	0.0973098	2.21868	258	0
ERS451417_02065	1717.62.peg.2077	NA	NA	NA	1	7	Cbelfantii_FRC0043,"Cdiphtheriae_NCTC11397","Cpseudotuberculosis_31","Cpseudotuberculosis_ATCC19410","Csilvaticum_KL0182","Culcerans_NCTC12077","Culcerans_NCTC7910"	0.436242	0.118868	2.20552	0.247163	0.118868	2.20552	258	0
ERS451417_00514	1717.62.peg.518	NA	NA	NA	1	39	Cargentoratense_DSM44202,"Catypicum_R2070","Caurimucosum_ATCC700975","Cbelfantii_FRC0043","Ccallunae_DSM20147","Ccamporealensis_DSM44610","Cdeserti_GIMN1010","Cdiphtheriae_NCTC11397","Cdoosanense_DSM45436","Cefficiens_YS314","Cepidermidicanis_DSM45586","Cfalsenii_DSM44353","Cglutamicum_ATCC13032","Cglycinophilum_AJ3170","Chalotolerans_YIM70093","Chumireducens_DSM45392","Cimitans_DSM44264","Cjeike…	0.115303	0.115303	1.80298	0.115303	0.115303	1.80298	258	0
ERS451417_00572	1717.62.peg.575	NA	NA	NA	1	38	Cargentoratense_DSM44202,"Catypicum_R2070","Caurimucosum_ATCC700975","Cbelfantii_FRC0043","Ccallunae_DSM20147","Ccamporealensis_DSM44610","Cdeserti_GIMN1010","Cdiphtheriae_NCTC11397","Cdoosanense_DSM45436","Cefficiens_YS314","Cepidermidicanis_DSM45586","Cfalsenii_DSM44353","Cglutamicum_ATCC13032","Cglycinophilum_AJ3170","Chalotolerans_YIM70093","Chumireducens_DSM45392","Cimitans_DSM44264","Cjeike…	0.14858	0.14858	1.47854	0.14858	0.14858	1.47854	3330	0
ERS451417_01498	1717.62.peg.1506	NA	NA	NA	1	34	Cargentoratense_DSM44202,"Catypicum_R2070","Caurimucosum_ATCC700975","Cbelfantii_FRC0043","Ccallunae_DSM20147","Ccamporealensis_DSM44610","Cdeserti_GIMN1010","Cdiphtheriae_NCTC11397","Cdoosanense_DSM45436","Cefficiens_YS314","Cepidermidicanis_DSM45586","Cglutamicum_ATCC13032","Cglycinophilum_AJ3170","Chalotolerans_YIM70093","Chumireducens_DSM45392","Cimitans_DSM44264","Cjeikeium_K41","Ckutscheri_…	0.220012	0.202084	1.74735	0.220012	0.202084	1.74735	1026	1	1. 0.7037;2. 215;3. 643;4. 266;5. 266;6. 796;7. 284;8. 850;9. 598;10. S;11. AGC
ERS451417_01202	1717.62.peg.1210	NA	NA	NA	1	39	Cargentoratense_DSM44202,"Catypicum_R2070","Caurimucosum_ATCC700975","Cbelfantii_FRC0043","Ccallunae_DSM20147","Ccamporealensis_DSM44610","Cdeserti_GIMN1010","Cdiphtheriae_NCTC11397","Cdoosanense_DSM45436","Cefficiens_YS314","Cepidermidicanis_DSM45586","Cfalsenii_DSM44353","Cglutamicum_ATCC13032","Cglycinophilum_AJ3170","Chalotolerans_YIM70093","Chumireducens_DSM45392","Cimitans_DSM44264","Cjeike…	0.193251	0.149861	1.58809	0.193251	0.149861	1.58809	3074	1	1. 0.76072;2. 701;3. 2101;4. 810;5. 810;6. 2428;7. 893;8. 2677;9. 1549;10. K;11. AAA
ERS451417_02051	1717.62.peg.2062	NA	NA	NA	1	37	Cargentoratense_DSM44202,"Catypicum_R2070","Caurimucosum_ATCC700975","Cbelfantii_FRC0043","Ccallunae_DSM20147","Ccamporealensis_DSM44610","Cdeserti_GIMN1010","Cdiphtheriae_NCTC11397","Cdoosanense_DSM45436","Cefficiens_YS314","Cepidermidicanis_DSM45586","Cfalsenii_DSM44353","Cglutamicum_ATCC13032","Cglycinophilum_AJ3170","Chalotolerans_YIM70093","Chumireducens_DSM45392","Cimitans_DSM44264","Cjeike…	0.158649	0.158649	1.72794	0.158649	0.158649	1.72794	1026	1	1. 0.56128;2. 428;3. 1282;4. 510;5. 510;6. 1528;7. 725;8. 2173;9. 1078;10. T;11. ACG
ERS451417_02388	1717.62.peg.2420	NA	NA	NA	1	28	Catypicum_R2070,"Cbelfantii_FRC0043","Ccallunae_DSM20147","Ccamporealensis_DSM44610","Cdeserti_GIMN1010","Cdiphtheriae_NCTC11397","Cdoosanense_DSM45436","Cefficiens_YS314","Cglutamicum_ATCC13032","Cglycinophilum_AJ3170","Chalotolerans_YIM70093","Chumireducens_DSM45392","Cimitans_DSM44264","Ckutscheri_DSM20755","Cmarinum_DSM44953","Cmaris_DSM45190","Cpseudotuberculosis_31","Cpseudotuberculosis_ATC…	0.330154	0.330154	1.97601	0.330154	0.330154	1.97601	258	0
ERS451417_00343	1717.62.peg.346	NA	NA	NA	1	39	Cargentoratense_DSM44202,"Catypicum_R2070","Caurimucosum_ATCC700975","Cbelfantii_FRC0043","Ccallunae_DSM20147","Ccamporealensis_DSM44610","Cdeserti_GIMN1010","Cdiphtheriae_NCTC11397","Cdoosanense_DSM45436","Cefficiens_YS314","Cepidermidicanis_DSM45586","Cfalsenii_DSM44353","Cglutamicum_ATCC13032","Cglycinophilum_AJ3170","Chalotolerans_YIM70093","Chumireducens_DSM45392","Cimitans_DSM44264","Cjeike…	0.0714526	0.0714526	2.23024	0.0714526	0.0714526	2.23023	1282	0
ERS451417_00596	1717.62.peg.600	NA	NA	NA	1	30	Cargentoratense_DSM44202,"Caurimucosum_ATCC700975","Cbelfantii_FRC0043","Ccallunae_DSM20147","Ccamporealensis_DSM44610","Cdeserti_GIMN1010","Cdiphtheriae_NCTC11397","Cdoosanense_DSM45436","Cefficiens_YS314","Cepidermidicanis_DSM45586","Cglutamicum_ATCC13032","Chalotolerans_YIM70093","Chumireducens_DSM45392","Cimitans_DSM44264","Ckutscheri_DSM20755","Clactis_RW25","Cmarinum_DSM44953","Cmaris_DSM45…	0.0845361	0.0790113	2.12246	0.0845361	0.0790113	2.12246	2	1	1. 0.53269;2. 378;3. 1132;4. 403;5. 403;6. 1207;7. 473;8. 1417;9. 901;10. I;11. ATC
ERS451417_00496	1717.62.peg.499	NA	NA	NA	1	39	Cargentoratense_DSM44202,"Catypicum_R2070","Caurimucosum_ATCC700975","Cbelfantii_FRC0043","Ccallunae_DSM20147","Ccamporealensis_DSM44610","Cdeserti_GIMN1010","Cdiphtheriae_NCTC11397","Cdoosanense_DSM45436","Cefficiens_YS314","Cepidermidicanis_DSM45586","Cfalsenii_DSM44353","Cglutamicum_ATCC13032","Cglycinophilum_AJ3170","Chalotolerans_YIM70093","Chumireducens_DSM45392","Cimitans_DSM44264","Cjeike…	0.192375	0.192375	1.66789	0.192375	0.192375	1.66788	3330	0
ERS451417_01476	1717.62.peg.1486	NA	NA	NA	1	37	Cargentoratense_DSM44202,"Catypicum_R2070","Caurimucosum_ATCC700975","Cbelfantii_FRC0043","Ccallunae_DSM20147","Ccamporealensis_DSM44610","Cdeserti_GIMN1010","Cdiphtheriae_NCTC11397","Cdoosanense_DSM45436","Cefficiens_YS314","Cepidermidicanis_DSM45586","Cglutamicum_ATCC13032","Cglycinophilum_AJ3170","Chalotolerans_YIM70093","Chumireducens_DSM45392","Cimitans_DSM44264","Cjeikeium_K41","Ckroppenste…	0.263916	0.263916	1.69658	0.263916	0.263916	1.69658	3330	0
ERS451417_00887	1717.62.peg.893	NA	NA	NA	1	30	Catypicum_R2070,"Caurimucosum_ATCC700975","Cbelfantii_FRC0043","Ccallunae_DSM20147","Ccamporealensis_DSM44610","Cdeserti_GIMN1010","Cdiphtheriae_NCTC11397","Cdoosanense_DSM45436","Cefficiens_YS314","Cglutamicum_ATCC13032","Chalotolerans_YIM70093","Chumireducens_DSM45392","Cimitans_DSM44264","Ckroppenstedtii_DSM44385","Ckutscheri_DSM20755","Clactis_RW25","Cmarinum_DSM44953","Cmaris_DSM45190","Cmus…	0.18867	0.18867	1.99382	0.18867	0.18867	1.99382	258	0
ERS451417_01449	1717.62.peg.1456	NA	NA	NA	1	35	Cargentoratense_DSM44202,"Catypicum_R2070","Caurimucosum_ATCC700975","Cbelfantii_FRC0043","Ccallunae_DSM20147","Ccamporealensis_DSM44610","Cdeserti_GIMN1010","Cdiphtheriae_NCTC11397","Cdoosanense_DSM45436","Cefficiens_YS314","Cepidermidicanis_DSM45586","Cfalsenii_DSM44353","Cglutamicum_ATCC13032","Cglycinophilum_AJ3170","Chalotolerans_YIM70093","Chumireducens_DSM45392","Cimitans_DSM44264","Cjeike…	0.0800615	0.0800615	1.58445	0.0800615	0.0800615	1.58445	3330	0
ERS451417_01325	1717.62.peg.1333	NA	NA	NA	1	38	Cargentoratense_DSM44202,"Catypicum_R2070","Caurimucosum_ATCC700975","Cbelfantii_FRC0043","Ccallunae_DSM20147","Ccamporealensis_DSM44610","Cdeserti_GIMN1010","Cdiphtheriae_NCTC11397","Cdoosanense_DSM45436","Cefficiens_YS314","Cepidermidicanis_DSM45586","Cfalsenii_DSM44353","Cglutamicum_ATCC13032","Cglycinophilum_AJ3170","Chalotolerans_YIM70093","Chumireducens_DSM45392","Cimitans_DSM44264","Cjeike…	0.153535	0.153535	1.82583	0.153535	0.153535	1.82584	258	0
ERS451417_01437	1717.62.peg.1444	NA	NA	NA	1	37	Cargentoratense_DSM44202,"Catypicum_R2070","Caurimucosum_ATCC700975","Cbelfantii_FRC0043","Ccallunae_DSM20147","Ccamporealensis_DSM44610","Cdeserti_GIMN1010","Cdiphtheriae_NCTC11397","Cdoosanense_DSM45436","Cefficiens_YS314","Cepidermidicanis_DSM45586","Cfalsenii_DSM44353","Cglutamicum_ATCC13032","Cglycinophilum_AJ3170","Chalotolerans_YIM70093","Chumireducens_DSM45392","Cimitans_DSM44264","Cjeike…	0.173916	0.173916	1.59377	0.173916	0.173916	1.59377	258	0
ERS451417_01056	1717.62.peg.1067	NA	NA	NA	1	38	Cargentoratense_DSM44202,"Catypicum_R2070","Caurimucosum_ATCC700975","Cbelfantii_FRC0043","Ccallunae_DSM20147","Ccamporealensis_DSM44610","Cdeserti_GIMN1010","Cdiphtheriae_NCTC11397","Cdoosanense_DSM45436","Cefficiens_YS314","Cepidermidicanis_DSM45586","Cfalsenii_DSM44353","Cglutamicum_ATCC13032","Cglycinophilum_AJ3170","Chalotolerans_YIM70093","Chumireducens_DSM45392","Cimitans_DSM44264","Cjeike…	0.121326	0.121326	1.79194	0.121326	0.121326	1.79194	1282	0
ERS451417_00123	1717.62.peg.121	NA	NA	NA	1	11	Cbelfantii_FRC0043,"Cdiphtheriae_NCTC11397","Chumireducens_DSM45392","Cmarinum_DSM44953","Cpseudotuberculosis_31","Cpseudotuberculosis_ATCC19410","Crouxii_FRC0190","Csilvaticum_KL0182","Ctestudinoris_DSM44614","Culcerans_NCTC12077","Culcerans_NCTC7910"	0.127266	0.127266	1.96691	0.127266	0.127266	1.96691	2306	0
ERS451417_01587	1717.62.peg.1596	NA	NA	NA	1	36	Cargentoratense_DSM44202,"Caurimucosum_ATCC700975","Cbelfantii_FRC0043","Ccallunae_DSM20147","Ccamporealensis_DSM44610","Cdeserti_GIMN1010","Cdiphtheriae_NCTC11397","Cdoosanense_DSM45436","Cefficiens_YS314","Cepidermidicanis_DSM45586","Cfalsenii_DSM44353","Cglutamicum_ATCC13032","Cglycinophilum_AJ3170","Chalotolerans_YIM70093","Chumireducens_DSM45392","Cimitans_DSM44264","Cjeikeium_K41","Ckroppen…	0.530443	0.254366	1.61851	0.530424	0.254356	1.61851	2	2	1. 0.74766;2. 138;3. 412;4. 164;5. 164;6. 490;7. 218;8. 652;9. 385;10. I;11. ATT	1. 0.86771;2. 254;3. 760;4. 287;5. 287;6. 859;7. 347;8. 1039;9. 700;10. R;11. CGA
ERS451417_02135	1717.62.peg.2155	NA	NA	NA	1	7	Cbelfantii_FRC0043,"Cdiphtheriae_NCTC11397","Cpseudotuberculosis_31","Cpseudotuberculosis_ATCC19410","Csilvaticum_KL0182","Culcerans_NCTC12077","Culcerans_NCTC7910"	0.0965614	0.0965614	2.79045	0.0965614	0.0965614	2.79045	258	0
ERS451417_01654	1717.62.peg.1661	NA	NA	NA	1	38	Cargentoratense_DSM44202,"Catypicum_R2070","Caurimucosum_ATCC700975","Cbelfantii_FRC0043","Ccallunae_DSM20147","Ccamporealensis_DSM44610","Cdeserti_GIMN1010","Cdiphtheriae_NCTC11397","Cdoosanense_DSM45436","Cefficiens_YS314","Cepidermidicanis_DSM45586","Cfalsenii_DSM44353","Cglutamicum_ATCC13032","Cglycinophilum_AJ3170","Chalotolerans_YIM70093","Chumireducens_DSM45392","Cimitans_DSM44264","Cjeike…	0.137604	0.137604	1.73597	0.137614	0.137614	1.73597	258	0
ERS451417_00994	1717.62.peg.1005	NA	NA	NA	1	17	Cargentoratense_DSM44202,"Catypicum_R2070","Cbelfantii_FRC0043","Ccallunae_DSM20147","Cdeserti_GIMN1010","Cdiphtheriae_NCTC11397","Cefficiens_YS314","Cglutamicum_ATCC13032","Cglycinophilum_AJ3170","Ckutscheri_DSM20755","Cmustelae_DSM45274","Cpseudotuberculosis_31","Cpseudotuberculosis_ATCC19410","Crouxii_FRC0190","Csilvaticum_KL0182","Cterpenotabidum_Y11","Culcerans_NCTC7910"	50.7094	0.0963956	2.10047	0.0970702	0.0970702	2.09325	256	0
ERS451417_00475	1717.62.peg.478	NA	NA	NA	1	39	Cargentoratense_DSM44202,"Catypicum_R2070","Caurimucosum_ATCC700975","Cbelfantii_FRC0043","Ccallunae_DSM20147","Ccamporealensis_DSM44610","Cdeserti_GIMN1010","Cdiphtheriae_NCTC11397","Cdoosanense_DSM45436","Cefficiens_YS314","Cepidermidicanis_DSM45586","Cfalsenii_DSM44353","Cglutamicum_ATCC13032","Cglycinophilum_AJ3170","Chalotolerans_YIM70093","Chumireducens_DSM45392","Cimitans_DSM44264","Cjeike…	0.611096	0.183923	1.8814	0.302755	0.183924	1.8814	2306	0
ERS451417_01001	1717.62.peg.1012	NA	NA	NA	1	19	Cbelfantii_FRC0043,"Ccamporealensis_DSM44610","Cdiphtheriae_NCTC11397","Cefficiens_YS314","Cepidermidicanis_DSM45586","Chalotolerans_YIM70093","Chumireducens_DSM45392","Ckutscheri_DSM20755","Cmarinum_DSM44953","Cmustelae_DSM45274","Cpseudotuberculosis_31","Cpseudotuberculosis_ATCC19410","Crouxii_FRC0190","Csilvaticum_KL0182","Csimulans_PES1","Csingulare_IBSB52218","Ctestudinoris_DSM44614","Culcer…	0.124047	0.124047	2.19459	0.124047	0.124047	2.19459	3330	0
ERS451417_01658	1717.62.peg.1665	NA	NA	NA	1	24	Cargentoratense_DSM44202,"Cbelfantii_FRC0043","Ccallunae_DSM20147","Cdeserti_GIMN1010","Cdiphtheriae_NCTC11397","Cdoosanense_DSM45436","Cefficiens_YS314","Cepidermidicanis_DSM45586","Cglutamicum_ATCC13032","Chalotolerans_YIM70093","Chumireducens_DSM45392","Ckroppenstedtii_DSM44385","Ckutscheri_DSM20755","Clactis_RW25","Cmarinum_DSM44953","Cmaris_DSM45190","Cmustelae_DSM45274","Cpseudotuberculosis…	0.191627	0.191627	1.70529	0.191627	0.191627	1.70529	1282	0
ERS451417_01178	1717.62.peg.1187	NA	NA	NA	1	39	Cargentoratense_DSM44202,"Catypicum_R2070","Caurimucosum_ATCC700975","Cbelfantii_FRC0043","Ccallunae_DSM20147","Ccamporealensis_DSM44610","Cdeserti_GIMN1010","Cdiphtheriae_NCTC11397","Cdoosanense_DSM45436","Cefficiens_YS314","Cepidermidicanis_DSM45586","Cfalsenii_DSM44353","Cglutamicum_ATCC13032","Cglycinophilum_AJ3170","Chalotolerans_YIM70093","Chumireducens_DSM45392","Cimitans_DSM44264","Cjeike…	0.172472	0.172301	1.65519	0.17251	0.172291	1.65519	1282	0
ERS451417_01320	1717.62.peg.1328	NA	NA	NA	1	37	Cargentoratense_DSM44202,"Catypicum_R2070","Caurimucosum_ATCC700975","Cbelfantii_FRC0043","Ccallunae_DSM20147","Ccamporealensis_DSM44610","Cdeserti_GIMN1010","Cdiphtheriae_NCTC11397","Cdoosanense_DSM45436","Cefficiens_YS314","Cepidermidicanis_DSM45586","Cfalsenii_DSM44353","Cglutamicum_ATCC13032","Cglycinophilum_AJ3170","Chalotolerans_YIM70093","Chumireducens_DSM45392","Cimitans_DSM44264","Cjeike…	5.37022	0.26223	1.57718	0.262248	0.262248	1.57685	3328	0
ERS451417_00495	1717.62.peg.498	NA	NA	NA	1	39	Cargentoratense_DSM44202,"Catypicum_R2070","Caurimucosum_ATCC700975","Cbelfantii_FRC0043","Ccallunae_DSM20147","Ccamporealensis_DSM44610","Cdeserti_GIMN1010","Cdiphtheriae_NCTC11397","Cdoosanense_DSM45436","Cefficiens_YS314","Cepidermidicanis_DSM45586","Cfalsenii_DSM44353","Cglutamicum_ATCC13032","Cglycinophilum_AJ3170","Chalotolerans_YIM70093","Chumireducens_DSM45392","Cimitans_DSM44264","Cjeike…	0.147202	0.147202	2.07607	0.147202	0.147202	2.07607	258	0
ERS451417_00303	1717.62.peg.304	NA	NA	NA	1	22	Catypicum_R2070,"Caurimucosum_ATCC700975","Cbelfantii_FRC0043","Ccamporealensis_DSM44610","Cdiphtheriae_NCTC11397","Cepidermidicanis_DSM45586","Chumireducens_DSM45392","Cimitans_DSM44264","Cmarinum_DSM44953","Cmustelae_DSM45274","Cpseudotuberculosis_31","Cpseudotuberculosis_ATCC19410","CriegeliiPUDD83A45","Crouxii_FRC0190","Csilvaticum_KL0182","Csimulans_PES1","Csingulare_IBSB52218","Ctestudinori…	0.486619	0.134565	1.09414	0.258763	0.134555	1.09414	258	0
ERS451417_01495	1717.62.peg.1503	NA	NA	NA	1	37	Cargentoratense_DSM44202,"Catypicum_R2070","Caurimucosum_ATCC700975","Cbelfantii_FRC0043","Ccallunae_DSM20147","Ccamporealensis_DSM44610","Cdeserti_GIMN1010","Cdiphtheriae_NCTC11397","Cdoosanense_DSM45436","Cefficiens_YS314","Cepidermidicanis_DSM45586","Cfalsenii_DSM44353","Cglutamicum_ATCC13032","Cglycinophilum_AJ3170","Chalotolerans_YIM70093","Chumireducens_DSM45392","Cimitans_DSM44264","Cjeike…	0.25083	0.25083	1.62826	0.25083	0.25083	1.62826	3330	0
ERS451417_01630	1717.62.peg.1637	NA	NA	NA	1	37	Cargentoratense_DSM44202,"Catypicum_R2070","Caurimucosum_ATCC700975","Cbelfantii_FRC0043","Ccallunae_DSM20147","Ccamporealensis_DSM44610","Cdeserti_GIMN1010","Cdiphtheriae_NCTC11397","Cdoosanense_DSM45436","Cefficiens_YS314","Cepidermidicanis_DSM45586","Cfalsenii_DSM44353","Cglutamicum_ATCC13032","Cglycinophilum_AJ3170","Chalotolerans_YIM70093","Cimitans_DSM44264","Cjeikeium_K41","Ckroppenstedtii…	0.265505	0.0523978	1.72669	0.119346	0.0523978	1.72669	258	0
ERS451417_00328	1717.62.peg.330	NA	NA	NA	1	23	Cbelfantii_FRC0043,"Ccallunae_DSM20147","Cdeserti_GIMN1010","Cdiphtheriae_NCTC11397","Cdoosanense_DSM45436","Cefficiens_YS314","Cepidermidicanis_DSM45586","Cglutamicum_ATCC13032","Chalotolerans_YIM70093","Chumireducens_DSM45392","Cimitans_DSM44264","Ckutscheri_DSM20755","Cmarinum_DSM44953","Cmustelae_DSM45274","Cpseudotuberculosis_31","Cpseudotuberculosis_ATCC19410","Crouxii_FRC0190","Csilvaticum…	0.194566	0.194566	1.58283	0.194566	0.194566	1.58283	3330	0
ERS451417_00977	1717.62.peg.987	NA	NA	NA	1	28	Catypicum_R2070,"Caurimucosum_ATCC700975","Cbelfantii_FRC0043","Ccallunae_DSM20147","Ccamporealensis_DSM44610","Cdeserti_GIMN1010","Cdiphtheriae_NCTC11397","Cdoosanense_DSM45436","Cefficiens_YS314","Cglutamicum_ATCC13032","Chumireducens_DSM45392","Cimitans_DSM44264","Ckutscheri_DSM20755","Cmarinum_DSM44953","Cmaris_DSM45190","Cmustelae_DSM45274","Cpseudotuberculosis_31","Cpseudotuberculosis_ATCC1…	0.212826	0.212826	1.79348	0.212826	0.212826	1.79348	3330	0
ERS451417_00655	1717.62.peg.660	NA	NA	NA	1	39	Cargentoratense_DSM44202,"Catypicum_R2070","Caurimucosum_ATCC700975","Cbelfantii_FRC0043","Ccallunae_DSM20147","Ccamporealensis_DSM44610","Cdeserti_GIMN1010","Cdiphtheriae_NCTC11397","Cdoosanense_DSM45436","Cefficiens_YS314","Cepidermidicanis_DSM45586","Cfalsenii_DSM44353","Cglutamicum_ATCC13032","Cglycinophilum_AJ3170","Chalotolerans_YIM70093","Chumireducens_DSM45392","Cimitans_DSM44264","Cjeike…	0.148002	0.130194	1.82358	0.148012	0.130194	1.82358	2	1	1. 0.74833;2. 346;3. 1036;4. 364;5. 364;6. 1090;7. 379;8. 1135;9. 964;10. G;11. GGT
ERS451417_02066	1717.62.peg.2078	NA	NA	NA	1	38	Cargentoratense_DSM44202,"Catypicum_R2070","Caurimucosum_ATCC700975","Cbelfantii_FRC0043","Ccallunae_DSM20147","Ccamporealensis_DSM44610","Cdeserti_GIMN1010","Cdiphtheriae_NCTC11397","Cdoosanense_DSM45436","Cefficiens_YS314","Cepidermidicanis_DSM45586","Cfalsenii_DSM44353","Cglutamicum_ATCC13032","Cglycinophilum_AJ3170","Chalotolerans_YIM70093","Chumireducens_DSM45392","Cimitans_DSM44264","Cjeike…	0.0917871	0.0917871	2.21558	0.0917871	0.0917871	2.21558	258	0
ERS451417_00559	1717.62.peg.563	NA	NA	NA	1	22	Cargentoratense_DSM44202,"Caurimucosum_ATCC700975","Cbelfantii_FRC0043","Cdeserti_GIMN1010","Cdiphtheriae_NCTC11397","Cglutamicum_ATCC13032","Cglycinophilum_AJ3170","Cimitans_DSM44264","Cjeikeium_K41","Ckutscheri_DSM20755","Cmustelae_DSM45274","Cpseudotuberculosis_31","Cpseudotuberculosis_ATCC19410","CriegeliiPUDD83A45","Crouxii_FRC0190","Csilvaticum_KL0182","Csimulans_PES1","Csingulare_IBSB52218…	0.154424	0.154424	2.73359	0.154424	0.154424	2.73359	3330	0
ERS451417_02025	1717.62.peg.2030	NA	NA	NA	1	29	Caurimucosum_ATCC700975,"Cbelfantii_FRC0043","Ccallunae_DSM20147","Ccamporealensis_DSM44610","Cdeserti_GIMN1010","Cdiphtheriae_NCTC11397","Cdoosanense_DSM45436","Cefficiens_YS314","Cepidermidicanis_DSM45586","Cfalsenii_DSM44353","Cglutamicum_ATCC13032","Chalotolerans_YIM70093","Chumireducens_DSM45392","Cjeikeium_K41","Clactis_RW25","Cmarinum_DSM44953","Cmaris_DSM45190","Cmustelae_DSM45274","Cpseu…	0.149395	0.149376	2.05969	0.149727	0.149376	2.0597	3074	3	1. 0.44952;2. 292;3. 874;4. 828;5. 352;6. 1054;7. 526;8. 1576;9. 637;10. A;11. GCT	1. 0.56246;2. 467;3. 1399;4. 1021;5. 537;6. 1609;7. 722;8. 2164;9. 1021;10. T;11. ACG	1. 0.53087;2. 804;3. 2410;4. 1537;5. 906;6. 2716;7. 1175;8. 3523;9. 1810;10. P;11. CCC
ERS451417_00659	1717.62.peg.663	NA	NA	NA	1	28	Catypicum_R2070,"Caurimucosum_ATCC700975","Cbelfantii_FRC0043","Ccallunae_DSM20147","Ccamporealensis_DSM44610","Cdeserti_GIMN1010","Cdiphtheriae_NCTC11397","Cdoosanense_DSM45436","Cepidermidicanis_DSM45586","Cglutamicum_ATCC13032","Chalotolerans_YIM70093","Chumireducens_DSM45392","Cimitans_DSM44264","Cmarinum_DSM44953","Cmaris_DSM45190","Cmustelae_DSM45274","Cpseudotuberculosis_31","Cpseudotuberc…	0.349313	0.269686	1.59186	0.349313	0.269686	1.59186	3074	1	1. 0.76077;2. 29;3. 85;4. 57;5. 34;6. 100;7. 67;8. 199;9. 16;10. G;11. GGT
ERS451417_01162	1717.62.peg.1173	NA	NA	NA	1	37	Cargentoratense_DSM44202,"Catypicum_R2070","Caurimucosum_ATCC700975","Cbelfantii_FRC0043","Ccallunae_DSM20147","Ccamporealensis_DSM44610","Cdeserti_GIMN1010","Cdiphtheriae_NCTC11397","Cdoosanense_DSM45436","Cefficiens_YS314","Cepidermidicanis_DSM45586","Cfalsenii_DSM44353","Cglutamicum_ATCC13032","Cglycinophilum_AJ3170","Chalotolerans_YIM70093","Chumireducens_DSM45392","Cimitans_DSM44264","Cjeike…	0.121344	0.121334	1.94995	0.121344	0.121344	1.94936	1282	0
ERS451417_01489	1717.62.peg.1497	NA	NA	NA	1	38	Cargentoratense_DSM44202,"Catypicum_R2070","Caurimucosum_ATCC700975","Cbelfantii_FRC0043","Ccallunae_DSM20147","Ccamporealensis_DSM44610","Cdeserti_GIMN1010","Cdiphtheriae_NCTC11397","Cdoosanense_DSM45436","Cefficiens_YS314","Cepidermidicanis_DSM45586","Cfalsenii_DSM44353","Cglutamicum_ATCC13032","Cglycinophilum_AJ3170","Chalotolerans_YIM70093","Chumireducens_DSM45392","Cimitans_DSM44264","Cjeike…	0.224119	0.224119	1.69925	0.224119	0.224119	1.69925	258	0
ERS451417_01531	1717.62.peg.1540	NA	NA	NA	1	38	Cargentoratense_DSM44202,"Catypicum_R2070","Caurimucosum_ATCC700975","Cbelfantii_FRC0043","Ccallunae_DSM20147","Ccamporealensis_DSM44610","Cdeserti_GIMN1010","Cdiphtheriae_NCTC11397","Cdoosanense_DSM45436","Cefficiens_YS314","Cepidermidicanis_DSM45586","Cfalsenii_DSM44353","Cglutamicum_ATCC13032","Cglycinophilum_AJ3170","Chalotolerans_YIM70093","Chumireducens_DSM45392","Cimitans_DSM44264","Cjeike…	0.119429	0.119429	1.88061	0.119429	0.119429	1.88061	258	0
ERS451417_00027	1717.62.peg.24	NA	NA	NA	1	32	Cargentoratense_DSM44202,"Catypicum_R2070","Caurimucosum_ATCC700975","Cbelfantii_FRC0043","Ccallunae_DSM20147","Cdeserti_GIMN1010","Cdiphtheriae_NCTC11397","Cdoosanense_DSM45436","Cefficiens_YS314","Cfalsenii_DSM44353","Cglutamicum_ATCC13032","Cglycinophilum_AJ3170","Chalotolerans_YIM70093","Cjeikeium_K41","Ckroppenstedtii_DSM44385","Ckutscheri_DSM20755","Cmustelae_DSM45274","Cpseudotuberculosis_…	0.472881	0.205466	1.94186	0.472881	0.205466	1.94186	2	2	1. 0.8663;2. 75;3. 223;4. 122;5. 122;6. 364;7. 179;8. 535;9. 208;10. D;11. GAT	1. 0.85198;2. 179;3. 535;4. 232;5. 232;6. 694;7. 289;8. 865;9. 493;10. G;11. GGT
ERS451417_00968	1717.62.peg.976	NA	NA	NA	1	16	Cbelfantii_FRC0043,"Ccallunae_DSM20147","Cdeserti_GIMN1010","Cdiphtheriae_NCTC11397","Cepidermidicanis_DSM45586","Cglutamicum_ATCC13032","Cglycinophilum_AJ3170","Ckutscheri_DSM20755","Clactis_RW25","Cpseudotuberculosis_31","Cpseudotuberculosis_ATCC19410","Crouxii_FRC0190","Csilvaticum_KL0182","Ctestudinoris_DSM44614","Culcerans_NCTC12077","Culcerans_NCTC7910"	0.118535	0.118535	2.28176	0.118525	0.118525	2.28177	3330	0
ERS451417_01668	1717.62.peg.1675	NA	NA	NA	1	38	Cargentoratense_DSM44202,"Catypicum_R2070","Caurimucosum_ATCC700975","Cbelfantii_FRC0043","Ccallunae_DSM20147","Ccamporealensis_DSM44610","Cdeserti_GIMN1010","Cdiphtheriae_NCTC11397","Cdoosanense_DSM45436","Cefficiens_YS314","Cepidermidicanis_DSM45586","Cfalsenii_DSM44353","Cglutamicum_ATCC13032","Cglycinophilum_AJ3170","Chalotolerans_YIM70093","Chumireducens_DSM45392","Cimitans_DSM44264","Cjeike…	0.140312	0.140312	1.70384	0.140312	0.140312	1.70384	258	0
ERS451417_00405	1717.62.peg.405	NA	NA	NA	1	39	Cargentoratense_DSM44202,"Catypicum_R2070","Caurimucosum_ATCC700975","Cbelfantii_FRC0043","Ccallunae_DSM20147","Ccamporealensis_DSM44610","Cdeserti_GIMN1010","Cdiphtheriae_NCTC11397","Cdoosanense_DSM45436","Cefficiens_YS314","Cepidermidicanis_DSM45586","Cfalsenii_DSM44353","Cglutamicum_ATCC13032","Cglycinophilum_AJ3170","Chalotolerans_YIM70093","Chumireducens_DSM45392","Cimitans_DSM44264","Cjeike…	0.447932	0.156666	2.80993	0.263916	0.156667	2.80993	258	0
ERS451417_00931	1717.62.peg.938	NA	NA	NA	1	36	Catypicum_R2070,"Caurimucosum_ATCC700975","Cbelfantii_FRC0043","Ccallunae_DSM20147","Ccamporealensis_DSM44610","Cdeserti_GIMN1010","Cdiphtheriae_NCTC11397","Cdoosanense_DSM45436","Cefficiens_YS314","Cepidermidicanis_DSM45586","Cfalsenii_DSM44353","Cglutamicum_ATCC13032","Cglycinophilum_AJ3170","Chalotolerans_YIM70093","Chumireducens_DSM45392","Cjeikeium_K41","Ckroppenstedtii_DSM44385","Ckutscheri…	0.296931	0.21705	1.49699	0.296921	0.21705	1.49699	3074	1	1. 0.80492;2. 65;3. 193;4. 87;5. 87;6. 259;7. 109;8. 325;9. 118;10. R;11. CGT
ERS451417_02173	1717.62.peg.2199	NA	NA	NA	1	38	Cargentoratense_DSM44202,"Catypicum_R2070","Caurimucosum_ATCC700975","Cbelfantii_FRC0043","Ccallunae_DSM20147","Ccamporealensis_DSM44610","Cdeserti_GIMN1010","Cdiphtheriae_NCTC11397","Cdoosanense_DSM45436","Cefficiens_YS314","Cepidermidicanis_DSM45586","Cfalsenii_DSM44353","Cglutamicum_ATCC13032","Cglycinophilum_AJ3170","Chalotolerans_YIM70093","Chumireducens_DSM45392","Cimitans_DSM44264","Cjeike…	0.296661	0.0672504	1.84666	0.296662	0.0672507	1.84666	1026	1	1. 0.79949;2. 317;3. 949;4. 396;5. 396;6. 1186;7. 555;8. 1663;9. 877;10. D;11. GAT
ERS451417_02007	1717.62.peg.2012	NA	NA	NA	1	14	Cbelfantii_FRC0043,"Cdeserti_GIMN1010","Cdiphtheriae_NCTC11397","Cefficiens_YS314","Cglutamicum_ATCC13032","Cglycinophilum_AJ3170","Chalotolerans_YIM70093","Ckutscheri_DSM20755","Cpseudotuberculosis_31","Cpseudotuberculosis_ATCC19410","Csilvaticum_KL0182","Ctestudinoris_DSM44614","Culcerans_NCTC12077","Culcerans_NCTC7910"	0.0349	0.0349	3.14965	0.0349	0.0349	3.14965	3330	0
ERS451417_00971	1717.62.peg.979	NA	NA	NA	1	14	Cbelfantii_FRC0043,"Cdeserti_GIMN1010","Cdiphtheriae_NCTC11397","Cepidermidicanis_DSM45586","Cglutamicum_ATCC13032","Ckutscheri_DSM20755","Clactis_RW25","Cpseudotuberculosis_31","Cpseudotuberculosis_ATCC19410","Crouxii_FRC0190","Csilvaticum_KL0182","Ctestudinoris_DSM44614","Culcerans_NCTC12077","Culcerans_NCTC7910"	0.14914	0.14914	2.76726	0.14914	0.14914	2.76726	258	0
ERS451417_00946	1717.62.peg.953	NA	NA	NA	1	39	Cargentoratense_DSM44202,"Catypicum_R2070","Caurimucosum_ATCC700975","Cbelfantii_FRC0043","Ccallunae_DSM20147","Ccamporealensis_DSM44610","Cdeserti_GIMN1010","Cdiphtheriae_NCTC11397","Cdoosanense_DSM45436","Cefficiens_YS314","Cepidermidicanis_DSM45586","Cfalsenii_DSM44353","Cglutamicum_ATCC13032","Cglycinophilum_AJ3170","Chalotolerans_YIM70093","Chumireducens_DSM45392","Cimitans_DSM44264","Cjeike…	0.148584	0.148584	1.83161	0.148584	0.148584	1.83161	258	0
ERS451417_00504	1717.62.peg.508	NA	NA	NA	1	22	Caurimucosum_ATCC700975,"Cbelfantii_FRC0043","Ccallunae_DSM20147","Cdeserti_GIMN1010","Cdiphtheriae_NCTC11397","Cefficiens_YS314","Cglutamicum_ATCC13032","Chumireducens_DSM45392","Cjeikeium_K41","Ckutscheri_DSM20755","Cmarinum_DSM44953","Cmaris_DSM45190","Cpseudotuberculosis_31","Cpseudotuberculosis_ATCC19410","Crouxii_FRC0190","Csilvaticum_KL0182","Csingulare_IBSB52218","Ctestudinoris_DSM44614",…	0.121931	0.121931	1.95684	0.121931	0.121931	1.95684	258	0
ERS451417_00716	1717.62.peg.721	NA	NA	NA	1	31	Cargentoratense_DSM44202,"Caurimucosum_ATCC700975","Cbelfantii_FRC0043","Ccallunae_DSM20147","Ccamporealensis_DSM44610","Cdeserti_GIMN1010","Cdiphtheriae_NCTC11397","Cefficiens_YS314","Cepidermidicanis_DSM45586","Cfalsenii_DSM44353","Cglycinophilum_AJ3170","Chalotolerans_YIM70093","Chumireducens_DSM45392","Cimitans_DSM44264","Cjeikeium_K41","Cmarinum_DSM44953","Cmaris_DSM45190","Cmustelae_DSM4527…	0.193409	0.176408	1.69658	0.193409	0.176408	1.69658	3074	1	1. 0.74593;2. 36;3. 106;4. 62;5. 54;6. 160;7. 161;8. 481;9. 55;10. D;11. GAT
ERS451417_00947	1717.62.peg.954	NA	NA	NA	1	39	Cargentoratense_DSM44202,"Catypicum_R2070","Caurimucosum_ATCC700975","Cbelfantii_FRC0043","Ccallunae_DSM20147","Ccamporealensis_DSM44610","Cdeserti_GIMN1010","Cdiphtheriae_NCTC11397","Cdoosanense_DSM45436","Cefficiens_YS314","Cepidermidicanis_DSM45586","Cfalsenii_DSM44353","Cglutamicum_ATCC13032","Cglycinophilum_AJ3170","Chalotolerans_YIM70093","Chumireducens_DSM45392","Cimitans_DSM44264","Cjeike…	0.157254	0.157254	1.79401	0.157254	0.157254	1.79401	258	0
ERS451417_02012	1717.62.peg.2017	NA	NA	NA	1	25	Cargentoratense_DSM44202,"Caurimucosum_ATCC700975","Cbelfantii_FRC0043","Ccallunae_DSM20147","Ccamporealensis_DSM44610","Cdeserti_GIMN1010","Cdiphtheriae_NCTC11397","Cefficiens_YS314","Cepidermidicanis_DSM45586","Cglutamicum_ATCC13032","Chalotolerans_YIM70093","Chumireducens_DSM45392","Cimitans_DSM44264","Cmarinum_DSM44953","Cmaris_DSM45190","Cmustelae_DSM45274","Cpseudotuberculosis_ATCC19410","C…	0.113764	0.113764	1.71521	0.113764	0.113764	1.71521	6146	1	1. 0.7084;2. 141;3. 421;4. 156;5. 151;6. 451;7. 152;8. 454;9. 334;10. K;11. AAG
ERS451417_00877	1717.62.peg.883	NA	NA	NA	1	39	Cargentoratense_DSM44202,"Catypicum_R2070","Caurimucosum_ATCC700975","Cbelfantii_FRC0043","Ccallunae_DSM20147","Ccamporealensis_DSM44610","Cdeserti_GIMN1010","Cdiphtheriae_NCTC11397","Cdoosanense_DSM45436","Cefficiens_YS314","Cepidermidicanis_DSM45586","Cfalsenii_DSM44353","Cglutamicum_ATCC13032","Cglycinophilum_AJ3170","Chalotolerans_YIM70093","Chumireducens_DSM45392","Cimitans_DSM44264","Cjeike…	0.159929	0.159929	1.74737	0.159929	0.159929	1.74737	3330	0
ERS451417_01287	1717.62.peg.1295	NA	NA	NA	1	34	Catypicum_R2070,"Caurimucosum_ATCC700975","Cbelfantii_FRC0043","Ccallunae_DSM20147","Ccamporealensis_DSM44610","Cdiphtheriae_NCTC11397","Cdoosanense_DSM45436","Cefficiens_YS314","Cepidermidicanis_DSM45586","Cfalsenii_DSM44353","Cglutamicum_ATCC13032","Cglycinophilum_AJ3170","Chalotolerans_YIM70093","Cimitans_DSM44264","Cjeikeium_K41","Ckroppenstedtii_DSM44385","Ckutscheri_DSM20755","Clactis_RW25"…	0.2105	0.154743	1.92362	0.2105	0.154743	1.92362	2	1	1. 0.77183;2. 252;3. 754;4. 277;5. 277;6. 829;7. 299;8. 895;9. 694;10. I;11. ATT
ERS451417_01591	1717.62.peg.1600	NA	NA	NA	1	7	Cbelfantii_FRC0043,"Cdiphtheriae_NCTC11397","Cpseudotuberculosis_31","Cpseudotuberculosis_ATCC19410","Csilvaticum_KL0182","Culcerans_NCTC12077","Culcerans_NCTC7910"	0.110737	0.110737	2.26623	0.110737	0.110737	2.26623	258	0
ERS451417_01602	1717.62.peg.1611	NA	NA	NA	1	38	Cargentoratense_DSM44202,"Catypicum_R2070","Caurimucosum_ATCC700975","Cbelfantii_FRC0043","Ccallunae_DSM20147","Ccamporealensis_DSM44610","Cdeserti_GIMN1010","Cdiphtheriae_NCTC11397","Cdoosanense_DSM45436","Cefficiens_YS314","Cepidermidicanis_DSM45586","Cfalsenii_DSM44353","Cglutamicum_ATCC13032","Cglycinophilum_AJ3170","Chalotolerans_YIM70093","Chumireducens_DSM45392","Cimitans_DSM44264","Cjeike…	0.100926	0.100917	1.59036	0.100927	0.100927	1.59036	258	0
ERS451417_00221	1717.62.peg.218	NA	NA	NA	1	10	Cbelfantii_FRC0043,"Cdiphtheriae_NCTC11397","Ckutscheri_DSM20755","Cpseudotuberculosis_31","Cpseudotuberculosis_ATCC19410","Crouxii_FRC0190","Csilvaticum_KL0182","Culcerans_NCTC12077","Culcerans_NCTC7910","Cvitaeruminis_DSM20294"	0.0883921	0.0841235	2.4105	0.0883921	0.0841235	2.4105	2050	1	1. 0.56192;2. 121;3. 361;4. 168;5. 135;6. 403;7. 136;8. 406;9. 316;10. Q;11. CAA
ERS451417_01676	1717.62.peg.1683	NA	NA	NA	1	33	Catypicum_R2070,"Caurimucosum_ATCC700975","Cbelfantii_FRC0043","Ccallunae_DSM20147","Ccamporealensis_DSM44610","Cdeserti_GIMN1010","Cdiphtheriae_NCTC11397","Cdoosanense_DSM45436","Cefficiens_YS314","Cglutamicum_ATCC13032","Chalotolerans_YIM70093","Chumireducens_DSM45392","Cimitans_DSM44264","Ckroppenstedtii_DSM44385","Ckutscheri_DSM20755","Clactis_RW25","Cmarinum_DSM44953","Cmaris_DSM45190","Cmus…	0.221644	0.196759	1.64522	0.221644	0.19676	1.64522	1026	1	1. 0.63998;2. 338;3. 1012;4. 391;5. 388;6. 1162;7. 430;8. 1288;9. 874;10. A;11. GCA
ERS451417_00237	1717.62.peg.233	NA	NA	NA	1	13	Caurimucosum_ATCC700975,"Cbelfantii_FRC0043","Cdiphtheriae_NCTC11397","Chalotolerans_YIM70093","Chumireducens_DSM45392","Cmarinum_DSM44953","Cmaris_DSM45190","Cpseudotuberculosis_31","Cpseudotuberculosis_ATCC19410","Crouxii_FRC0190","Csingulare_IBSB52218","Culcerans_NCTC12077","Culcerans_NCTC7910"	1.26639	0.271347	2.0166	0.271783	0.271783	2.01704	2304	0
ERS451417_00769	1717.62.peg.774	NA	NA	NA	1	30	Catypicum_R2070,"Caurimucosum_ATCC700975","Cbelfantii_FRC0043","Ccamporealensis_DSM44610","Cdeserti_GIMN1010","Cdiphtheriae_NCTC11397","Cdoosanense_DSM45436","Cefficiens_YS314","Cepidermidicanis_DSM45586","Cglutamicum_ATCC13032","Chalotolerans_YIM70093","Chumireducens_DSM45392","Cimitans_DSM44264","Ckutscheri_DSM20755","Cmarinum_DSM44953","Cmaris_DSM45190","Cmustelae_DSM45274","Cpseudotuberculosi…	0.371	0.323745	1.59185	0.396482	0.322868	1.59608	3074	1	1. 0.77447;2. 161;3. 481;4. 179;5. 171;6. 511;7. 207;8. 619;9. 334;10. V;11. GTG
ERS451417_00509	1717.62.peg.513	NA	NA	NA	1	39	Cargentoratense_DSM44202,"Catypicum_R2070","Caurimucosum_ATCC700975","Cbelfantii_FRC0043","Ccallunae_DSM20147","Ccamporealensis_DSM44610","Cdeserti_GIMN1010","Cdiphtheriae_NCTC11397","Cdoosanense_DSM45436","Cefficiens_YS314","Cepidermidicanis_DSM45586","Cfalsenii_DSM44353","Cglutamicum_ATCC13032","Cglycinophilum_AJ3170","Chalotolerans_YIM70093","Chumireducens_DSM45392","Cimitans_DSM44264","Cjeike…	0.101692	0.101692	2.4538	0.101692	0.101692	2.45381	258	0
ERS451417_01944	1717.62.peg.1942	NA	NA	NA	1	16	Catypicum_R2070,"Caurimucosum_ATCC700975","Cbelfantii_FRC0043","Cdiphtheriae_NCTC11397","Cjeikeium_K41","Ckroppenstedtii_DSM44385","Clactis_RW25","Cpseudotuberculosis_31","Cpseudotuberculosis_ATCC19410","CriegeliiPUDD83A45","Csilvaticum_KL0182","Csimulans_PES1","Culcerans_NCTC12077","Culcerans_NCTC7910","Curealyticum_DSM7109","Cuterequi_DSM45634"	0.110201	0.110201	2.16023	0.110201	0.110201	2.16025	2050	1	1. 0.41507;2. 131;3. 391;4. 148;5. 148;6. 442;7. 167;8. 499;9. 169;10. T;11. ACT
ERS451417_01959	1717.62.peg.1959	NA	NA	NA	1	37	Cargentoratense_DSM44202,"Catypicum_R2070","Caurimucosum_ATCC700975","Cbelfantii_FRC0043","Ccallunae_DSM20147","Ccamporealensis_DSM44610","Cdeserti_GIMN1010","Cdiphtheriae_NCTC11397","Cdoosanense_DSM45436","Cefficiens_YS314","Cepidermidicanis_DSM45586","Cfalsenii_DSM44353","Cglutamicum_ATCC13032","Cglycinophilum_AJ3170","Chalotolerans_YIM70093","Chumireducens_DSM45392","Cimitans_DSM44264","Cjeike…	0.102142	0.102122	1.86959	0.102122	0.102122	1.86959	258	0
ERS451417_02004	1717.62.peg.2008	NA	NA	NA	1	7	Cbelfantii_FRC0043,"Cdiphtheriae_NCTC11397","Cpseudotuberculosis_31","Cpseudotuberculosis_ATCC19410","Csilvaticum_KL0182","Culcerans_NCTC12077","Culcerans_NCTC7910"	0.100403	0.100403	6.00841	0.100403	0.100403	6.00844	2	1	1. 0.50765;2. 133;3. 397;4. 167;5. 133;6. 397;7. 133;8. 397;9. 397;10. A;11. GCT
ERS451417_01047	1717.62.peg.1057	NA	NA	NA	1	22	Cbelfantii_FRC0043,"Ccallunae_DSM20147","Ccamporealensis_DSM44610","Cdeserti_GIMN1010","Cdiphtheriae_NCTC11397","Cefficiens_YS314","Cepidermidicanis_DSM45586","Chalotolerans_YIM70093","Chumireducens_DSM45392","Cimitans_DSM44264","Cmarinum_DSM44953","Cmaris_DSM45190","Cmustelae_DSM45274","Cpseudotuberculosis_31","Cpseudotuberculosis_ATCC19410","Crouxii_FRC0190","Csilvaticum_KL0182","Csingulare_IBS…	0.331769	0.331769	1.67116	0.33177	0.33177	1.67116	3330	0
ERS451417_01851	1717.62.peg.1853	NA	NA	NA	1	38	Cargentoratense_DSM44202,"Catypicum_R2070","Caurimucosum_ATCC700975","Cbelfantii_FRC0043","Ccallunae_DSM20147","Ccamporealensis_DSM44610","Cdeserti_GIMN1010","Cdiphtheriae_NCTC11397","Cdoosanense_DSM45436","Cefficiens_YS314","Cepidermidicanis_DSM45586","Cfalsenii_DSM44353","Cglutamicum_ATCC13032","Cglycinophilum_AJ3170","Chalotolerans_YIM70093","Chumireducens_DSM45392","Cimitans_DSM44264","Cjeike…	0.16089	0.16089	1.77805	0.16089	0.16089	1.77805	258	0
ERS451417_00577	1717.62.peg.580	NA	NA	NA	1	38	Cargentoratense_DSM44202,"Catypicum_R2070","Caurimucosum_ATCC700975","Cbelfantii_FRC0043","Ccallunae_DSM20147","Ccamporealensis_DSM44610","Cdeserti_GIMN1010","Cdiphtheriae_NCTC11397","Cdoosanense_DSM45436","Cefficiens_YS314","Cepidermidicanis_DSM45586","Cfalsenii_DSM44353","Cglutamicum_ATCC13032","Cglycinophilum_AJ3170","Chalotolerans_YIM70093","Chumireducens_DSM45392","Cimitans_DSM44264","Cjeike…	0.182469	0.175632	1.67583	0.182469	0.175632	1.67583	3074	1	1. 0.64707;2. 313;3. 937;4. 368;5. 368;6. 1102;7. 455;8. 1363;9. 730;10. A;11. GCG
ERS451417_00795	1717.62.peg.801	NA	NA	NA	1	30	Caurimucosum_ATCC700975,"Cbelfantii_FRC0043","Ccallunae_DSM20147","Cdeserti_GIMN1010","Cdiphtheriae_NCTC11397","Cdoosanense_DSM45436","Cepidermidicanis_DSM45586","Cglutamicum_ATCC13032","Cglycinophilum_AJ3170","Chalotolerans_YIM70093","Chumireducens_DSM45392","Cimitans_DSM44264","Ckutscheri_DSM20755","Cmarinum_DSM44953","Cmaris_DSM45190","Cmustelae_DSM45274","Cpseudotuberculosis_31","Cpseudotuber…	0.712272	0.279357	1.92638	0.387893	0.279358	1.92638	258	0
ERS451417_01745	1717.62.peg.1748	NA	NA	NA	1	33	Cargentoratense_DSM44202,"Caurimucosum_ATCC700975","Cbelfantii_FRC0043","Ccallunae_DSM20147","Cdeserti_GIMN1010","Cdiphtheriae_NCTC11397","Cefficiens_YS314","Cepidermidicanis_DSM45586","Cfalsenii_DSM44353","Cglutamicum_ATCC13032","Cglycinophilum_AJ3170","Chalotolerans_YIM70093","Chumireducens_DSM45392","Cimitans_DSM44264","Cjeikeium_K41","Ckutscheri_DSM20755","Clactis_RW25","Cmarinum_DSM44953","C…	0.1734	0.1734	1.41783	0.1734	0.1734	1.41783	3330	0
ERS451417_00296	1717.62.peg.297	NA	NA	NA	1	14	Cbelfantii_FRC0043,"Cdiphtheriae_NCTC11397","Cepidermidicanis_DSM45586","Chalotolerans_YIM70093","Chumireducens_DSM45392","Ckutscheri_DSM20755","Cmustelae_DSM45274","Cpseudotuberculosis_31","Cpseudotuberculosis_ATCC19410","Crouxii_FRC0190","Csilvaticum_KL0182","Culcerans_NCTC12077","Culcerans_NCTC7910","Cvitaeruminis_DSM20294"	0.737278	0.30003	2.10166	0.438248	0.30002	2.10166	3330	0
ERS451417_02064	1717.62.peg.2076	NA	NA	NA	1	7	Cbelfantii_FRC0043,"Cdiphtheriae_NCTC11397","Cpseudotuberculosis_31","Cpseudotuberculosis_ATCC19410","Csilvaticum_KL0182","Culcerans_NCTC12077","Culcerans_NCTC7910"	0.255853	0.0748024	3.26939	0.0753623	0.0753623	3.25061	258	0
ERS451417_01258	1717.62.peg.1266	NA	NA	NA	1	18	Cargentoratense_DSM44202,"Cbelfantii_FRC0043","Ccallunae_DSM20147","Cdeserti_GIMN1010","Cdiphtheriae_NCTC11397","Cdoosanense_DSM45436","Cepidermidicanis_DSM45586","Cglutamicum_ATCC13032","Chalotolerans_YIM70093","Chumireducens_DSM45392","Ckutscheri_DSM20755","Cmarinum_DSM44953","Cpseudotuberculosis_ATCC19410","Crouxii_FRC0190","Ctestudinoris_DSM44614","Culcerans_NCTC12077","Culcerans_NCTC7910","C…	0.312479	0.312479	1.37126	0.312479	0.312479	1.37126	6146	2	1. 0.43092;2. 134;3. 400;4. 152;5. 137;6. 409;7. 149;8. 445;9. 274;10. V;11. GTA	1. 0.47362;2. 219;3. 655;4. 242;5. 222;6. 664;7. 241;8. 721;9. 490;10. I;11. ATT
ERS451417_00860	1717.62.peg.865	NA	NA	NA	1	27	Cargentoratense_DSM44202,"Catypicum_R2070","Caurimucosum_ATCC700975","Cbelfantii_FRC0043","Ccallunae_DSM20147","Ccamporealensis_DSM44610","Cdeserti_GIMN1010","Cdiphtheriae_NCTC11397","Cdoosanense_DSM45436","Cefficiens_YS314","Cfalsenii_DSM44353","Cglutamicum_ATCC13032","Chumireducens_DSM45392","Cimitans_DSM44264","Ckroppenstedtii_DSM44385","Ckutscheri_DSM20755","Cmarinum_DSM44953","Cmustelae_DSM4…	0.153922	0.153922	1.49225	0.153922	0.153922	1.49226	2	1	1. 0.66492;2. 475;3. 1423;4. 552;5. 506;6. 1516;7. 551;8. 1651;9. 1210;10. E;11. GAA
ERS451417_01292	1717.62.peg.1300	NA	NA	NA	1	38	Cargentoratense_DSM44202,"Catypicum_R2070","Caurimucosum_ATCC700975","Cbelfantii_FRC0043","Ccallunae_DSM20147","Ccamporealensis_DSM44610","Cdeserti_GIMN1010","Cdiphtheriae_NCTC11397","Cdoosanense_DSM45436","Cefficiens_YS314","Cepidermidicanis_DSM45586","Cfalsenii_DSM44353","Cglutamicum_ATCC13032","Cglycinophilum_AJ3170","Chalotolerans_YIM70093","Chumireducens_DSM45392","Cimitans_DSM44264","Cjeike…	0.261659	0.179004	1.67166	0.261669	0.178994	1.67166	2050	1	1. 0.75133;2. 293;3. 877;4. 315;5. 315;6. 943;7. 331;8. 991;9. 628;10. S;11. AGT
ERS451417_00225	1717.62.peg.221	NA	NA	NA	1	32	Cargentoratense_DSM44202,"Catypicum_R2070","Caurimucosum_ATCC700975","Cbelfantii_FRC0043","Ccallunae_DSM20147","Ccamporealensis_DSM44610","Cdeserti_GIMN1010","Cdiphtheriae_NCTC11397","Cefficiens_YS314","Cepidermidicanis_DSM45586","Cglutamicum_ATCC13032","Chalotolerans_YIM70093","Chumireducens_DSM45392","Cimitans_DSM44264","Ckroppenstedtii_DSM44385","Ckutscheri_DSM20755","Clactis_RW25","Cmarinum_D…	0.160702	0.160702	1.74336	0.160702	0.160702	1.74336	1282	0
ERS451417_00848	1717.62.peg.853	NA	NA	NA	1	6	Cbelfantii_FRC0043,"Cdiphtheriae_NCTC11397","Cpseudotuberculosis_ATCC19410","Crouxii_FRC0190","Csilvaticum_KL0182","Culcerans_NCTC7910"	0.05855	0.05855	2.13026	0.0841551	0.0841455	2.19537	6402	0
ERS451417_01417	1717.62.peg.1423	NA	NA	NA	1	38	Cargentoratense_DSM44202,"Catypicum_R2070","Caurimucosum_ATCC700975","Cbelfantii_FRC0043","Ccallunae_DSM20147","Ccamporealensis_DSM44610","Cdeserti_GIMN1010","Cdiphtheriae_NCTC11397","Cdoosanense_DSM45436","Cefficiens_YS314","Cepidermidicanis_DSM45586","Cfalsenii_DSM44353","Cglutamicum_ATCC13032","Cglycinophilum_AJ3170","Chalotolerans_YIM70093","Chumireducens_DSM45392","Cimitans_DSM44264","Cjeike…	0.15288	0.15288	1.55687	0.15288	0.15288	1.55687	1026	1	1. 0.55742;2. 23;3. 67;4. 57;5. 57;6. 169;7. 103;8. 307;9. 22;10. R;11. CGT
ERS451417_01991	1717.62.peg.1992	NA	NA	NA	1	20	Catypicum_R2070,"Caurimucosum_ATCC700975","Cbelfantii_FRC0043","Cdiphtheriae_NCTC11397","Cfalsenii_DSM44353","Chumireducens_DSM45392","Ckroppenstedtii_DSM44385","Ckutscheri_DSM20755","Clactis_RW25","Cmustelae_DSM45274","Cpseudotuberculosis_31","Cpseudotuberculosis_ATCC19410","CriegeliiPUDD83A45","Csilvaticum_KL0182","Cterpenotabidum_Y11","Ctestudinoris_DSM44614","Culcerans_NCTC12077","Culcerans_N…	0.324416	0.243129	1.82169	0.324416	0.243129	1.82169	2	1	1. 0.81861;2. 233;3. 697;4. 249;5. 249;6. 745;7. 269;8. 805;9. 670;10. G;11. GGC
ERS451417_00917	1717.62.peg.924	NA	NA	NA	1	18	Catypicum_R2070,"Cbelfantii_FRC0043","Ccamporealensis_DSM44610","Cdiphtheriae_NCTC11397","Cepidermidicanis_DSM45586","Cfalsenii_DSM44353","Cglycinophilum_AJ3170","Cjeikeium_K41","Ckroppenstedtii_DSM44385","Cpseudotuberculosis_31","Cpseudotuberculosis_ATCC19410","Crouxii_FRC0190","Csilvaticum_KL0182","Csimulans_PES1","Culcerans_NCTC12077","Culcerans_NCTC7910","Cuterequi_DSM45634","Cvitaeruminis_DS…	0.172417	0.172417	1.71215	0.172417	0.172417	1.71215	2306	0
ERS451417_01293	1717.62.peg.1301	NA	NA	NA	1	38	Cargentoratense_DSM44202,"Catypicum_R2070","Caurimucosum_ATCC700975","Cbelfantii_FRC0043","Ccallunae_DSM20147","Ccamporealensis_DSM44610","Cdeserti_GIMN1010","Cdiphtheriae_NCTC11397","Cdoosanense_DSM45436","Cefficiens_YS314","Cepidermidicanis_DSM45586","Cfalsenii_DSM44353","Cglutamicum_ATCC13032","Cglycinophilum_AJ3170","Chalotolerans_YIM70093","Chumireducens_DSM45392","Cimitans_DSM44264","Cjeike…	0.0834898	0.0834708	1.52103	0.0834803	0.0834708	1.52102	258	0
ERS451417_01472	1717.62.peg.1482	NA	NA	NA	1	31	Catypicum_R2070,"Caurimucosum_ATCC700975","Cbelfantii_FRC0043","Ccallunae_DSM20147","Ccamporealensis_DSM44610","Cdeserti_GIMN1010","Cdiphtheriae_NCTC11397","Cdoosanense_DSM45436","Cefficiens_YS314","Cepidermidicanis_DSM45586","Cglutamicum_ATCC13032","Chalotolerans_YIM70093","Chumireducens_DSM45392","Cimitans_DSM44264","Ckutscheri_DSM20755","Clactis_RW25","Cmarinum_DSM44953","Cmaris_DSM45190","Cmu…	0.299102	0.299102	1.60153	0.299102	0.299102	1.60153	3330	0
ERS451417_00073	1717.62.peg.70	NA	NA	NA	1	16	Caurimucosum_ATCC700975,"Cbelfantii_FRC0043","Cdiphtheriae_NCTC11397","Cepidermidicanis_DSM45586","Cjeikeium_K41","Ckutscheri_DSM20755","Clactis_RW25","Cmustelae_DSM45274","Cpseudotuberculosis_31","Cpseudotuberculosis_ATCC19410","CriegeliiPUDD83A45","Crouxii_FRC0190","Csilvaticum_KL0182","Culcerans_NCTC12077","Culcerans_NCTC7910","Cvitaeruminis_DSM20294"	0.282344	0.282344	3.33246	0.282344	0.282344	3.33247	2306	0
ERS451417_00979	1717.62.peg.989	NA	NA	NA	1	36	Cargentoratense_DSM44202,"Catypicum_R2070","Caurimucosum_ATCC700975","Cbelfantii_FRC0043","Ccallunae_DSM20147","Ccamporealensis_DSM44610","Cdeserti_GIMN1010","Cdiphtheriae_NCTC11397","Cdoosanense_DSM45436","Cefficiens_YS314","Cepidermidicanis_DSM45586","Cfalsenii_DSM44353","Cglutamicum_ATCC13032","Cglycinophilum_AJ3170","Chalotolerans_YIM70093","Chumireducens_DSM45392","Cjeikeium_K41","Ckroppenst…	0.168962	0.168962	1.53882	0.168962	0.168962	1.53882	2306	0
ERS451417_00881	1717.62.peg.887	NA	NA	NA	1	17	Caurimucosum_ATCC700975,"Cbelfantii_FRC0043","Ccamporealensis_DSM44610","Cdiphtheriae_NCTC11397","Cepidermidicanis_DSM45586","Cjeikeium_K41","Ckutscheri_DSM20755","Clactis_RW25","Cpseudotuberculosis_31","Cpseudotuberculosis_ATCC19410","Crouxii_FRC0190","Csilvaticum_KL0182","Csimulans_PES1","Csingulare_IBSB52218","Culcerans_NCTC12077","Culcerans_NCTC7910","Cuterequi_DSM45634"	0.146211	0.146211	2.66257	0.146211	0.146211	2.66258	258	0
ERS451417_01858	1717.62.peg.1860	NA	NA	NA	1	38	Cargentoratense_DSM44202,"Catypicum_R2070","Caurimucosum_ATCC700975","Cbelfantii_FRC0043","Ccallunae_DSM20147","Ccamporealensis_DSM44610","Cdeserti_GIMN1010","Cdiphtheriae_NCTC11397","Cdoosanense_DSM45436","Cefficiens_YS314","Cepidermidicanis_DSM45586","Cfalsenii_DSM44353","Cglutamicum_ATCC13032","Cglycinophilum_AJ3170","Chalotolerans_YIM70093","Chumireducens_DSM45392","Cimitans_DSM44264","Cjeike…	0.172167	0.172167	1.8841	0.172167	0.172167	1.8841	1282	0
ERS451417_00446	1717.62.peg.449	NA	NA	NA	1	19	Caurimucosum_ATCC700975,"Cbelfantii_FRC0043","Ccallunae_DSM20147","Ccamporealensis_DSM44610","Cdeserti_GIMN1010","Cdiphtheriae_NCTC11397","Cepidermidicanis_DSM45586","Cglutamicum_ATCC13032","Ckroppenstedtii_DSM44385","Ckutscheri_DSM20755","Cmustelae_DSM45274","Cpseudotuberculosis_31","Cpseudotuberculosis_ATCC19410","Crouxii_FRC0190","Csilvaticum_KL0182","Ctestudinoris_DSM44614","Culcerans_NCTC120…	0.348681	0.237384	2.05604	0.348681	0.237384	2.05604	2050	1	1. 0.82978;2. 143;3. 427;4. 148;5. 148;6. 442;7. 148;8. 442;9. 394;10. H;11. CAC
ERS451417_00843	1717.62.peg.848	NA	NA	NA	1	39	Cargentoratense_DSM44202,"Catypicum_R2070","Caurimucosum_ATCC700975","Cbelfantii_FRC0043","Ccallunae_DSM20147","Ccamporealensis_DSM44610","Cdeserti_GIMN1010","Cdiphtheriae_NCTC11397","Cdoosanense_DSM45436","Cefficiens_YS314","Cepidermidicanis_DSM45586","Cfalsenii_DSM44353","Cglutamicum_ATCC13032","Cglycinophilum_AJ3170","Chalotolerans_YIM70093","Chumireducens_DSM45392","Cimitans_DSM44264","Cjeike…	0.145812	0.145812	1.8183	0.145812	0.145812	1.81831	258	0
ERS451417_00771	1717.62.peg.776	NA	NA	NA	1	38	Cargentoratense_DSM44202,"Catypicum_R2070","Caurimucosum_ATCC700975","Cbelfantii_FRC0043","Ccallunae_DSM20147","Ccamporealensis_DSM44610","Cdeserti_GIMN1010","Cdiphtheriae_NCTC11397","Cdoosanense_DSM45436","Cefficiens_YS314","Cepidermidicanis_DSM45586","Cfalsenii_DSM44353","Cglutamicum_ATCC13032","Cglycinophilum_AJ3170","Chalotolerans_YIM70093","Chumireducens_DSM45392","Cimitans_DSM44264","Cjeike…	0.13339	0.13339	2.30416	0.13339	0.13339	2.30416	6402	0
ERS451417_00986	1717.62.peg.997	NA	NA	NA	1	39	Cargentoratense_DSM44202,"Catypicum_R2070","Caurimucosum_ATCC700975","Cbelfantii_FRC0043","Ccallunae_DSM20147","Ccamporealensis_DSM44610","Cdeserti_GIMN1010","Cdiphtheriae_NCTC11397","Cdoosanense_DSM45436","Cefficiens_YS314","Cepidermidicanis_DSM45586","Cfalsenii_DSM44353","Cglutamicum_ATCC13032","Cglycinophilum_AJ3170","Chalotolerans_YIM70093","Chumireducens_DSM45392","Cimitans_DSM44264","Cjeike…	9.02904	0.182644	1.64154	0.182682	0.182682	1.64048	1280	0
ERS451417_01272	1717.62.peg.1280	NA	NA	NA	1	17	Cargentoratense_DSM44202,"Cbelfantii_FRC0043","Cdiphtheriae_NCTC11397","Cefficiens_YS314","Cepidermidicanis_DSM45586","Cglutamicum_ATCC13032","Ckroppenstedtii_DSM44385","Ckutscheri_DSM20755","Clactis_RW25","Cmustelae_DSM45274","Cpseudotuberculosis_31","Cpseudotuberculosis_ATCC19410","Crouxii_FRC0190","Csilvaticum_KL0182","Culcerans_NCTC12077","Culcerans_NCTC7910","Cvitaeruminis_DSM20294"	0.0719204	0.0719204	2.12246	0.0719204	0.0719204	2.12246	258	0
ERS451417_00261	1717.62.peg.255	NA	NA	NA	1	8	Cbelfantii_FRC0043,"Cdiphtheriae_NCTC11397","Cepidermidicanis_DSM45586","Cpseudotuberculosis_31","Cpseudotuberculosis_ATCC19410","Crouxii_FRC0190","Culcerans_NCTC12077","Culcerans_NCTC7910"	0.632128	0.276095	3.50805	0.632128	0.276095	3.50805	2	1	1. 0.84786;2. 57;3. 169;4. 76;5. 64;6. 190;7. 67;8. 199;9. 133;10. A;11. GCA
ERS451417_01986	1717.62.peg.1986	NA	NA	NA	1	26	Cargentoratense_DSM44202,"Caurimucosum_ATCC700975","Cbelfantii_FRC0043","Ccallunae_DSM20147","Ccamporealensis_DSM44610","Cdeserti_GIMN1010","Cdiphtheriae_NCTC11397","Cdoosanense_DSM45436","Cepidermidicanis_DSM45586","Chalotolerans_YIM70093","Chumireducens_DSM45392","Clactis_RW25","Cmarinum_DSM44953","Cmustelae_DSM45274","Cpseudotuberculosis_31","Cpseudotuberculosis_ATCC19410","CriegeliiPUDD83A45"…	0.04915	0.04915	1.36268	0.04915	0.04915	1.36268	258	0
ERS451417_00468	1717.62.peg.472	NA	NA	NA	1	12	Cbelfantii_FRC0043,"Cdiphtheriae_NCTC11397","Ckutscheri_DSM20755","Cmustelae_DSM45274","Cpseudotuberculosis_31","Cpseudotuberculosis_ATCC19410","Crouxii_FRC0190","Csilvaticum_KL0182","Culcerans_NCTC12077","Culcerans_NCTC7910","Cuterequi_DSM45634","Cvitaeruminis_DSM20294"	0.162765	0.162765	3.17346	0.162765	0.162765	3.17346	258	0
ERS451417_01830	1717.62.peg.1834	NA	NA	NA	1	36	Cargentoratense_DSM44202,"Catypicum_R2070","Caurimucosum_ATCC700975","Cbelfantii_FRC0043","Ccallunae_DSM20147","Ccamporealensis_DSM44610","Cdeserti_GIMN1010","Cdiphtheriae_NCTC11397","Cdoosanense_DSM45436","Cefficiens_YS314","Cepidermidicanis_DSM45586","Cfalsenii_DSM44353","Cglutamicum_ATCC13032","Cglycinophilum_AJ3170","Chalotolerans_YIM70093","Chumireducens_DSM45392","Cimitans_DSM44264","Cjeike…	0.172574	0.172574	1.66684	0.172574	0.172574	1.66684	3330	0
ERS451417_01643	1717.62.peg.1650	NA	NA	NA	1	38	Cargentoratense_DSM44202,"Catypicum_R2070","Caurimucosum_ATCC700975","Cbelfantii_FRC0043","Ccallunae_DSM20147","Ccamporealensis_DSM44610","Cdeserti_GIMN1010","Cdiphtheriae_NCTC11397","Cdoosanense_DSM45436","Cefficiens_YS314","Cepidermidicanis_DSM45586","Cfalsenii_DSM44353","Cglutamicum_ATCC13032","Cglycinophilum_AJ3170","Chalotolerans_YIM70093","Chumireducens_DSM45392","Cimitans_DSM44264","Cjeike…	0.263018	0.263018	1.5811	0.263018	0.263018	1.5811	1282	0
ERS451417_00025	1717.62.peg.22	NA	NA	NA	1	32	Cargentoratense_DSM44202,"Catypicum_R2070","Caurimucosum_ATCC700975","Cbelfantii_FRC0043","Ccallunae_DSM20147","Cdeserti_GIMN1010","Cdiphtheriae_NCTC11397","Cdoosanense_DSM45436","Cefficiens_YS314","Cfalsenii_DSM44353","Cglutamicum_ATCC13032","Cglycinophilum_AJ3170","Chalotolerans_YIM70093","Cjeikeium_K41","Ckroppenstedtii_DSM44385","Ckutscheri_DSM20755","Cmustelae_DSM45274","Cpseudotuberculosis_…	0.191052	0.191052	1.48543	0.191061	0.191061	1.48543	3330	0
ERS451417_00830	1717.62.peg.834	NA	NA	NA	1	9	Cbelfantii_FRC0043,"Cdiphtheriae_NCTC11397","Ckutscheri_DSM20755","Cpseudotuberculosis_31","Cpseudotuberculosis_ATCC19410","Crouxii_FRC0190","Culcerans_NCTC12077","Culcerans_NCTC7910","Cvitaeruminis_DSM20294"	11.791	0.14902	2.29466	0.149296	0.149296	2.29511	2304	0
ERS451417_00548	1717.62.peg.552	NA	NA	NA	1	13	Cargentoratense_DSM44202,"Cbelfantii_FRC0043","Cdiphtheriae_NCTC11397","Ckutscheri_DSM20755","Clactis_RW25","Cmustelae_DSM45274","Cpseudotuberculosis_31","Cpseudotuberculosis_ATCC19410","Crouxii_FRC0190","Csilvaticum_KL0182","Culcerans_NCTC12077","Culcerans_NCTC7910","Curealyticum_DSM7109"	0.0993446	0.0993446	2.39992	0.0993348	0.0993348	2.39993	258	0
ERS451417_00318	1717.62.peg.320	NA	NA	NA	1	39	Cargentoratense_DSM44202,"Catypicum_R2070","Caurimucosum_ATCC700975","Cbelfantii_FRC0043","Ccallunae_DSM20147","Ccamporealensis_DSM44610","Cdeserti_GIMN1010","Cdiphtheriae_NCTC11397","Cdoosanense_DSM45436","Cefficiens_YS314","Cepidermidicanis_DSM45586","Cfalsenii_DSM44353","Cglutamicum_ATCC13032","Cglycinophilum_AJ3170","Chalotolerans_YIM70093","Chumireducens_DSM45392","Cimitans_DSM44264","Cjeike…	0.02542	0.02542	1.63754	0.02542	0.02542	1.63754	258	0
ERS451417_02151	1717.62.peg.2173	NA	NA	NA	1	8	Cbelfantii_FRC0043,"Cdiphtheriae_NCTC11397","Clactis_RW25","Cpseudotuberculosis_31","Cpseudotuberculosis_ATCC19410","Csilvaticum_KL0182","Culcerans_NCTC12077","Culcerans_NCTC7910"	0.77857	0.0989193	2.52402	0.778599	0.0989193	2.52402	2	2	1. 0.91495;2. 153;3. 457;4. 184;5. 168;6. 502;7. 188;8. 562;9. 271;10. H;11. CAC	1. 0.91196;2. 339;3. 1015;4. 405;5. 355;6. 1063;7. 375;8. 1123;9. 826;10. D;11. GAC
ERS451417_00858	1717.62.peg.863	NA	NA	NA	1	35	Cargentoratense_DSM44202,"Catypicum_R2070","Caurimucosum_ATCC700975","Cbelfantii_FRC0043","Ccallunae_DSM20147","Ccamporealensis_DSM44610","Cdeserti_GIMN1010","Cdiphtheriae_NCTC11397","Cdoosanense_DSM45436","Cefficiens_YS314","Cepidermidicanis_DSM45586","Cfalsenii_DSM44353","Cglutamicum_ATCC13032","Chalotolerans_YIM70093","Chumireducens_DSM45392","Cimitans_DSM44264","Ckroppenstedtii_DSM44385","Cku…	0.125762	0.0878722	1.60808	0.125762	0.0878722	1.60808	2	1	1. 0.69559;2. 227;3. 679;4. 269;5. 269;6. 805;7. 291;8. 871;9. 601;10. L;11. CTG
ERS451417_00755	1717.62.peg.760	NA	NA	NA	1	39	Cargentoratense_DSM44202,"Catypicum_R2070","Caurimucosum_ATCC700975","Cbelfantii_FRC0043","Ccallunae_DSM20147","Ccamporealensis_DSM44610","Cdeserti_GIMN1010","Cdiphtheriae_NCTC11397","Cdoosanense_DSM45436","Cefficiens_YS314","Cepidermidicanis_DSM45586","Cfalsenii_DSM44353","Cglutamicum_ATCC13032","Cglycinophilum_AJ3170","Chalotolerans_YIM70093","Chumireducens_DSM45392","Cimitans_DSM44264","Cjeike…	0.371578	0.106177	2.23575	0.218842	0.105512	2.27288	258	0
ERS451417_00182	1717.62.peg.178	NA	NA	NA	1	36	Cargentoratense_DSM44202,"Catypicum_R2070","Caurimucosum_ATCC700975","Cbelfantii_FRC0043","Ccallunae_DSM20147","Ccamporealensis_DSM44610","Cdeserti_GIMN1010","Cdiphtheriae_NCTC11397","Cdoosanense_DSM45436","Cefficiens_YS314","Cepidermidicanis_DSM45586","Cfalsenii_DSM44353","Cglutamicum_ATCC13032","Cglycinophilum_AJ3170","Chalotolerans_YIM70093","Chumireducens_DSM45392","Cjeikeium_K41","Ckroppenst…	0.250914	0.250914	1.32227	0.250914	0.250914	1.32227	1282	0
ERS451417_02043	1717.62.peg.2053	NA	NA	NA	1	38	Cargentoratense_DSM44202,"Catypicum_R2070","Caurimucosum_ATCC700975","Cbelfantii_FRC0043","Ccallunae_DSM20147","Ccamporealensis_DSM44610","Cdeserti_GIMN1010","Cdiphtheriae_NCTC11397","Cdoosanense_DSM45436","Cefficiens_YS314","Cepidermidicanis_DSM45586","Cfalsenii_DSM44353","Cglutamicum_ATCC13032","Cglycinophilum_AJ3170","Chalotolerans_YIM70093","Chumireducens_DSM45392","Cimitans_DSM44264","Cjeike…	0.244542	0.244542	1.7384	0.244542	0.244542	1.7384	3330	0
ERS451417_01000	1717.62.peg.1011	NA	NA	NA	1	24	Cbelfantii_FRC0043,"Ccallunae_DSM20147","Cdeserti_GIMN1010","Cdiphtheriae_NCTC11397","Cdoosanense_DSM45436","Cefficiens_YS314","Cglutamicum_ATCC13032","Cglycinophilum_AJ3170","Chalotolerans_YIM70093","Chumireducens_DSM45392","Ckroppenstedtii_DSM44385","Clactis_RW25","Cmarinum_DSM44953","Cmaris_DSM45190","Cpseudotuberculosis_31","Cpseudotuberculosis_ATCC19410","Crouxii_FRC0190","Csilvaticum_KL0182…	0.148208	0.148208	1.65394	0.148208	0.148208	1.65394	258	0
ERS451417_01582	1717.62.peg.1591	NA	NA	NA	1	37	Cargentoratense_DSM44202,"Catypicum_R2070","Caurimucosum_ATCC700975","Cbelfantii_FRC0043","Ccallunae_DSM20147","Ccamporealensis_DSM44610","Cdeserti_GIMN1010","Cdiphtheriae_NCTC11397","Cdoosanense_DSM45436","Cefficiens_YS314","Cepidermidicanis_DSM45586","Cfalsenii_DSM44353","Cglutamicum_ATCC13032","Cglycinophilum_AJ3170","Chalotolerans_YIM70093","Chumireducens_DSM45392","Cimitans_DSM44264","Cjeike…	1	0.144605	1.63452	1	0.144605	1.63453	1024	1	1. 0.95666;2. 181;3. 541;4. 188;5. 188;6. 562;7. 193;8. 577;9. 505;10. S;11. TCT
ERS451417_00829	1717.62.peg.833	NA	NA	NA	1	39	Cargentoratense_DSM44202,"Catypicum_R2070","Caurimucosum_ATCC700975","Cbelfantii_FRC0043","Ccallunae_DSM20147","Ccamporealensis_DSM44610","Cdeserti_GIMN1010","Cdiphtheriae_NCTC11397","Cdoosanense_DSM45436","Cefficiens_YS314","Cepidermidicanis_DSM45586","Cfalsenii_DSM44353","Cglutamicum_ATCC13032","Cglycinophilum_AJ3170","Chalotolerans_YIM70093","Chumireducens_DSM45392","Cimitans_DSM44264","Cjeike…	0.0871977	0.0871977	1.58477	0.0871977	0.0871977	1.58477	258	0
ERS451417_00373	1717.62.peg.372	NA	NA	NA	1	4	Cdiphtheriae_NCTC11397,"Cpseudotuberculosis_ATCC19410","Crouxii_FRC0190","Culcerans_NCTC12077"	0.302	0.302	3.53079	0.302	0.302	3.53079	4098	1	1. 0.73124;2. 226;3. 676;4. 250;5. 248;6. 742;7. 250;8. 748;9. 649;10. E;11. GAA
ERS451417_00681	1717.62.peg.688	NA	NA	NA	1	39	Cargentoratense_DSM44202,"Catypicum_R2070","Caurimucosum_ATCC700975","Cbelfantii_FRC0043","Ccallunae_DSM20147","Ccamporealensis_DSM44610","Cdeserti_GIMN1010","Cdiphtheriae_NCTC11397","Cdoosanense_DSM45436","Cefficiens_YS314","Cepidermidicanis_DSM45586","Cfalsenii_DSM44353","Cglutamicum_ATCC13032","Cglycinophilum_AJ3170","Chalotolerans_YIM70093","Chumireducens_DSM45392","Cimitans_DSM44264","Cjeike…	0.146942	0.137168	1.71342	0.146942	0.137168	1.71342	2	1	1. 0.7563;2. 228;3. 682;4. 231;5. 231;6. 691;7. 236;8. 706;9. 631;10. M;11. ATG
ERS451417_01044	1717.62.peg.1054	NA	NA	NA	1	34	Cargentoratense_DSM44202,"Catypicum_R2070","Caurimucosum_ATCC700975","Cbelfantii_FRC0043","Ccallunae_DSM20147","Ccamporealensis_DSM44610","Cdeserti_GIMN1010","Cdiphtheriae_NCTC11397","Cdoosanense_DSM45436","Cefficiens_YS314","Cepidermidicanis_DSM45586","Cfalsenii_DSM44353","Cglutamicum_ATCC13032","Cglycinophilum_AJ3170","Chalotolerans_YIM70093","Chumireducens_DSM45392","Cimitans_DSM44264","Cjeike…	0.199034	0.199034	1.94231	0.199034	0.199034	1.94233	7426	0
ERS451417_00175	1717.62.peg.173	NA	NA	NA	1	8	Cbelfantii_FRC0043,"Cdiphtheriae_NCTC11397","Ckutscheri_DSM20755","Cpseudotuberculosis_31","Cpseudotuberculosis_ATCC19410","Csilvaticum_KL0182","Culcerans_NCTC12077","Culcerans_NCTC7910"	0.168332	0.168332	4.53908	0.168332	0.168332	4.53909	258	0
ERS451417_00447	1717.62.peg.450	NA	NA	NA	1	17	Cbelfantii_FRC0043,"Ccallunae_DSM20147","Ccamporealensis_DSM44610","Cdeserti_GIMN1010","Cdiphtheriae_NCTC11397","Cepidermidicanis_DSM45586","Cglutamicum_ATCC13032","Ckutscheri_DSM20755","Cmustelae_DSM45274","Cpseudotuberculosis_31","Cpseudotuberculosis_ATCC19410","Crouxii_FRC0190","Csilvaticum_KL0182","Ctestudinoris_DSM44614","Culcerans_NCTC12077","Culcerans_NCTC7910","Cuterequi_DSM45634"	0.104145	0.104135	2.18488	0.104154	0.104135	2.18487	258	0
ERS451417_00282	1717.62.peg.283	NA	NA	NA	1	24	Caurimucosum_ATCC700975,"Cbelfantii_FRC0043","Ccamporealensis_DSM44610","Cdiphtheriae_NCTC11397","Cdoosanense_DSM45436","Cfalsenii_DSM44353","Chalotolerans_YIM70093","Chumireducens_DSM45392","Cimitans_DSM44264","Cmarinum_DSM44953","Cmaris_DSM45190","Cmustelae_DSM45274","Cpseudotuberculosis_31","Cpseudotuberculosis_ATCC19410","CriegeliiPUDD83A45","Csilvaticum_KL0182","Csimulans_PES1","Csingulare_I…	0.435542	0.157683	1.63814	0.271718	0.157683	1.63814	3330	0
ERS451417_01569	1717.62.peg.1578	NA	NA	NA	1	38	Cargentoratense_DSM44202,"Catypicum_R2070","Caurimucosum_ATCC700975","Cbelfantii_FRC0043","Ccallunae_DSM20147","Ccamporealensis_DSM44610","Cdeserti_GIMN1010","Cdiphtheriae_NCTC11397","Cdoosanense_DSM45436","Cefficiens_YS314","Cepidermidicanis_DSM45586","Cfalsenii_DSM44353","Cglutamicum_ATCC13032","Cglycinophilum_AJ3170","Chalotolerans_YIM70093","Chumireducens_DSM45392","Cimitans_DSM44264","Cjeike…	0.213094	0.125731	1.92955	0.213094	0.125731	1.92955	2	1	1. 0.83509;2. 279;3. 835;4. 321;5. 321;6. 961;7. 322;8. 964;9. 823;10. V;11. GTC
ERS451417_00859	1717.62.peg.864	NA	NA	NA	1	20	Cbelfantii_FRC0043,"Ccallunae_DSM20147","Cdeserti_GIMN1010","Cdiphtheriae_NCTC11397","Cdoosanense_DSM45436","Cefficiens_YS314","Cepidermidicanis_DSM45586","Chalotolerans_YIM70093","Chumireducens_DSM45392","Cimitans_DSM44264","Cmarinum_DSM44953","Cmaris_DSM45190","Cpseudotuberculosis_31","Cpseudotuberculosis_ATCC19410","Crouxii_FRC0190","Csilvaticum_KL0182","Ctestudinoris_DSM44614","Culcerans_NCTC…	0.819814	0.345567	1.4967	0.819814	0.345567	1.4967	2	1	1. 0.91686;2. 124;3. 370;4. 221;5. 139;6. 415;7. 148;8. 442;9. 337;10. Y;11. TAT
ERS451417_00510	1717.62.peg.514	NA	NA	NA	1	39	Cargentoratense_DSM44202,"Catypicum_R2070","Caurimucosum_ATCC700975","Cbelfantii_FRC0043","Ccallunae_DSM20147","Ccamporealensis_DSM44610","Cdeserti_GIMN1010","Cdiphtheriae_NCTC11397","Cdoosanense_DSM45436","Cefficiens_YS314","Cepidermidicanis_DSM45586","Cfalsenii_DSM44353","Cglutamicum_ATCC13032","Cglycinophilum_AJ3170","Chalotolerans_YIM70093","Chumireducens_DSM45392","Cimitans_DSM44264","Cjeike…	0.158306	0.158306	1.85962	0.158306	0.158306	1.85963	2306	0
ERS451417_01243	1717.62.peg.1251	NA	NA	NA	1	8	Cbelfantii_FRC0043,"Cdiphtheriae_NCTC11397","Cmustelae_DSM45274","Cpseudotuberculosis_ATCC19410","Crouxii_FRC0190","Csilvaticum_KL0182","Culcerans_NCTC12077","Culcerans_NCTC7910"	0.219553	0.219553	2.67854	0.219553	0.219553	2.67854	4098	3	1. 0.85928;2. 181;3. 541;4. 255;5. 220;6. 658;7. 221;8. 661;9. 505;10. L;11. TTG	1. 0.67247;2. 221;3. 661;4. 297;5. 260;6. 778;7. 261;8. 781;9. 610;10. L;11. CTC	1. 0.7966;2. 234;3. 700;4. 319;5. 273;6. 817;7. 274;8. 820;9. 649;10. H;11. CAC
ERS451417_00657	1717.62.peg.662	NA	NA	NA	1	39	Cargentoratense_DSM44202,"Catypicum_R2070","Caurimucosum_ATCC700975","Cbelfantii_FRC0043","Ccallunae_DSM20147","Ccamporealensis_DSM44610","Cdeserti_GIMN1010","Cdiphtheriae_NCTC11397","Cdoosanense_DSM45436","Cefficiens_YS314","Cepidermidicanis_DSM45586","Cfalsenii_DSM44353","Cglutamicum_ATCC13032","Cglycinophilum_AJ3170","Chalotolerans_YIM70093","Chumireducens_DSM45392","Cimitans_DSM44264","Cjeike…	0.151984	0.151984	1.67051	0.151984	0.151984	1.67051	3330	0
ERS451417_00466	1717.62.peg.470	NA	NA	NA	1	12	Cbelfantii_FRC0043,"Cdiphtheriae_NCTC11397","Ckutscheri_DSM20755","Cmustelae_DSM45274","Cpseudotuberculosis_31","Cpseudotuberculosis_ATCC19410","Crouxii_FRC0190","Csilvaticum_KL0182","Culcerans_NCTC12077","Culcerans_NCTC7910","Cuterequi_DSM45634","Cvitaeruminis_DSM20294"	0.232035	0.232035	1.85534	0.232035	0.232035	1.85534	3330	0
ERS451417_01881	1717.62.peg.1882	NA	NA	NA	1	16	Cargentoratense_DSM44202,"Cbelfantii_FRC0043","Cdiphtheriae_NCTC11397","Cepidermidicanis_DSM45586","Chalotolerans_YIM70093","Chumireducens_DSM45392","Cmarinum_DSM44953","Cmustelae_DSM45274","Cpseudotuberculosis_31","Cpseudotuberculosis_ATCC19410","Csilvaticum_KL0182","Csingulare_IBSB52218","Ctestudinoris_DSM44614","Culcerans_NCTC12077","Culcerans_NCTC7910","Cvitaeruminis_DSM20294"	0.232585	0.232585	1.57109	0.232585	0.232585	1.57109	258	0
ERS451417_00754	1717.62.peg.759	NA	NA	NA	1	39	Cargentoratense_DSM44202,"Catypicum_R2070","Caurimucosum_ATCC700975","Cbelfantii_FRC0043","Ccallunae_DSM20147","Ccamporealensis_DSM44610","Cdeserti_GIMN1010","Cdiphtheriae_NCTC11397","Cdoosanense_DSM45436","Cefficiens_YS314","Cepidermidicanis_DSM45586","Cfalsenii_DSM44353","Cglutamicum_ATCC13032","Cglycinophilum_AJ3170","Chalotolerans_YIM70093","Chumireducens_DSM45392","Cimitans_DSM44264","Cjeike…	0.131443	0.131443	2.08625	0.131443	0.131443	2.08624	258	0
ERS451417_01490	1717.62.peg.1498	NA	NA	NA	1	36	Cargentoratense_DSM44202,"Catypicum_R2070","Caurimucosum_ATCC700975","Cbelfantii_FRC0043","Ccallunae_DSM20147","Ccamporealensis_DSM44610","Cdeserti_GIMN1010","Cdiphtheriae_NCTC11397","Cdoosanense_DSM45436","Cefficiens_YS314","Cepidermidicanis_DSM45586","Cfalsenii_DSM44353","Cglutamicum_ATCC13032","Cglycinophilum_AJ3170","Chalotolerans_YIM70093","Chumireducens_DSM45392","Cimitans_DSM44264","Cjeike…	0.179392	0.179392	1.70349	0.179392	0.179392	1.70349	6146	1	1. 0.42698;2. 176;3. 526;4. 182;5. 182;6. 544;7. 203;8. 607;9. 382;10. I;11. ATA
ERS451417_00335	1717.62.peg.337	NA	NA	NA	1	36	Cargentoratense_DSM44202,"Catypicum_R2070","Caurimucosum_ATCC700975","Cbelfantii_FRC0043","Ccallunae_DSM20147","Ccamporealensis_DSM44610","Cdeserti_GIMN1010","Cdiphtheriae_NCTC11397","Cdoosanense_DSM45436","Cefficiens_YS314","Cepidermidicanis_DSM45586","Cglutamicum_ATCC13032","Cglycinophilum_AJ3170","Chalotolerans_YIM70093","Chumireducens_DSM45392","Cimitans_DSM44264","Cjeikeium_K41","Ckroppenste…	0.128455	0.128455	2.30679	0.128455	0.128455	2.30678	3330	0
ERS451417_01566	1717.62.peg.1575	NA	NA	NA	1	39	Cargentoratense_DSM44202,"Catypicum_R2070","Caurimucosum_ATCC700975","Cbelfantii_FRC0043","Ccallunae_DSM20147","Ccamporealensis_DSM44610","Cdeserti_GIMN1010","Cdiphtheriae_NCTC11397","Cdoosanense_DSM45436","Cefficiens_YS314","Cepidermidicanis_DSM45586","Cfalsenii_DSM44353","Cglutamicum_ATCC13032","Cglycinophilum_AJ3170","Chalotolerans_YIM70093","Chumireducens_DSM45392","Cimitans_DSM44264","Cjeike…	0.464532	0.140457	2.54742	0.262876	0.140447	2.54742	258	0
ERS451417_00457	1717.62.peg.461	NA	NA	NA	1	39	Cargentoratense_DSM44202,"Catypicum_R2070","Caurimucosum_ATCC700975","Cbelfantii_FRC0043","Ccallunae_DSM20147","Ccamporealensis_DSM44610","Cdeserti_GIMN1010","Cdiphtheriae_NCTC11397","Cdoosanense_DSM45436","Cefficiens_YS314","Cepidermidicanis_DSM45586","Cfalsenii_DSM44353","Cglutamicum_ATCC13032","Cglycinophilum_AJ3170","Chalotolerans_YIM70093","Chumireducens_DSM45392","Cimitans_DSM44264","Cjeike…	0.202454	0.202454	1.97889	0.202454	0.202454	1.97889	2	1	1. 0.55262;2. 21;3. 61;4. 21;5. 21;6. 61;7. 21;8. 61;9. 55;10. H;11. CAC
ERS451417_01725	1717.62.peg.1728	NA	NA	NA	1	6	Cbelfantii_FRC0043,"Cdiphtheriae_NCTC11397","Cpseudotuberculosis_ATCC19410","Csilvaticum_KL0182","Culcerans_NCTC12077","Culcerans_NCTC7910"	0.274842	0.268943	3.23681	0.268943	0.268933	3.2368	6402	0
ERS451417_00214	1717.62.peg.211	NA	NA	NA	1	6	Cbelfantii_FRC0043,"Cdiphtheriae_NCTC11397","Cmustelae_DSM45274","Cpseudotuberculosis_31","Cpseudotuberculosis_ATCC19410","Crouxii_FRC0190"	0.0990123	0.0989926	3.39092	0.106586	0.0990634	3.3935	2	1	1. 0.53936;2. 93;3. 277;4. 709;5. 95;6. 283;7. 96;8. 286;9. 256;10. A;11. GCA
ERS451417_00519	1717.62.peg.523	NA	NA	NA	1	8	Cbelfantii_FRC0043,"Cdiphtheriae_NCTC11397","Clactis_RW25","Cpseudotuberculosis_31","Cpseudotuberculosis_ATCC19410","Csilvaticum_KL0182","Culcerans_NCTC12077","Culcerans_NCTC7910"	0.1541	0.1541	3.46471	0.1541	0.1541	3.46469	258	0
ERS451417_00216	1717.62.peg.213	NA	NA	NA	1	23	Catypicum_R2070,"Cbelfantii_FRC0043","Ccallunae_DSM20147","Ccamporealensis_DSM44610","Cdeserti_GIMN1010","Cdiphtheriae_NCTC11397","Cdoosanense_DSM45436","Cglutamicum_ATCC13032","Chumireducens_DSM45392","Cimitans_DSM44264","Ckutscheri_DSM20755","Cmarinum_DSM44953","Cmustelae_DSM45274","Cpseudotuberculosis_31","Cpseudotuberculosis_ATCC19410","CriegeliiPUDD83A45","Crouxii_FRC0190","Csilvaticum_KL018…	0.207767	0.207749	1.33601	0.208011	0.207749	1.33601	258	0
ERS451417_00970	1717.62.peg.978	NA	NA	NA	1	11	Cbelfantii_FRC0043,"Cdiphtheriae_NCTC11397","Cepidermidicanis_DSM45586","Ckutscheri_DSM20755","Cpseudotuberculosis_31","Cpseudotuberculosis_ATCC19410","Crouxii_FRC0190","Csilvaticum_KL0182","Ctestudinoris_DSM44614","Culcerans_NCTC12077","Culcerans_NCTC7910"	0.156849	0.156849	3.06408	0.156849	0.156849	3.06408	258	0
ERS451417_00889	1717.62.peg.895	NA	NA	NA	1	6	Cbelfantii_FRC0043,"Cdiphtheriae_NCTC11397","Cpseudotuberculosis_ATCC19410","Crouxii_FRC0190","Csilvaticum_KL0182","Culcerans_NCTC12077"	0.222111	0.216867	2.91284	0.222111	0.216867	2.91284	4354	0
ERS451417_01961	1717.62.peg.1961	NA	NA	NA	1	6	Cbelfantii_FRC0043,"Cdiphtheriae_NCTC11397","Cpseudotuberculosis_31","Cpseudotuberculosis_ATCC19410","Culcerans_NCTC12077","Culcerans_NCTC7910"	0.158645	0.158645	2.17123	0.158645	0.158645	2.17123	2	1	1. 0.52866;2. 157;3. 469;4. 172;5. 157;6. 469;7. 157;8. 469;9. 457;10. T;11. ACG
ERS451417_00715	1717.62.peg.720	NA	NA	NA	1	16	Cargentoratense_DSM44202,"Cbelfantii_FRC0043","Cdeserti_GIMN1010","Cdiphtheriae_NCTC11397","Cefficiens_YS314","Cepidermidicanis_DSM45586","Cglutamicum_ATCC13032","Ckroppenstedtii_DSM44385","Clactis_RW25","Cmustelae_DSM45274","Cpseudotuberculosis_31","Cpseudotuberculosis_ATCC19410","Crouxii_FRC0190","Culcerans_NCTC12077","Culcerans_NCTC7910","Cvitaeruminis_DSM20294"	0.163115	0.163115	2.1137	0.163115	0.163115	2.1137	2306	0
ERS451417_01797	1717.62.peg.1802	NA	NA	NA	1	38	Cargentoratense_DSM44202,"Catypicum_R2070","Caurimucosum_ATCC700975","Cbelfantii_FRC0043","Ccallunae_DSM20147","Ccamporealensis_DSM44610","Cdeserti_GIMN1010","Cdiphtheriae_NCTC11397","Cdoosanense_DSM45436","Cefficiens_YS314","Cepidermidicanis_DSM45586","Cfalsenii_DSM44353","Cglutamicum_ATCC13032","Cglycinophilum_AJ3170","Chalotolerans_YIM70093","Chumireducens_DSM45392","Cimitans_DSM44264","Cjeike…	0.63305	0.247837	1.68349	0.367468	0.247837	1.68349	258	0
ERS451417_01604	1717.62.peg.1613	NA	NA	NA	1	7	Cbelfantii_FRC0043,"Cdiphtheriae_NCTC11397","Cpseudotuberculosis_31","Cpseudotuberculosis_ATCC19410","Csilvaticum_KL0182","Culcerans_NCTC12077","Culcerans_NCTC7910"	0.372327	0.372327	4.94009	0.372327	0.372327	4.94008	258	0
ERS451417_00336	1717.62.peg.338	NA	NA	NA	1	39	Cargentoratense_DSM44202,"Catypicum_R2070","Caurimucosum_ATCC700975","Cbelfantii_FRC0043","Ccallunae_DSM20147","Ccamporealensis_DSM44610","Cdeserti_GIMN1010","Cdiphtheriae_NCTC11397","Cdoosanense_DSM45436","Cefficiens_YS314","Cepidermidicanis_DSM45586","Cfalsenii_DSM44353","Cglutamicum_ATCC13032","Cglycinophilum_AJ3170","Chalotolerans_YIM70093","Chumireducens_DSM45392","Cimitans_DSM44264","Cjeike…	0.141156	0.141156	1.57295	0.141156	0.141156	1.57295	1026	1	1. 0.7031;2. 406;3. 1216;4. 446;5. 446;6. 1336;7. 507;8. 1519;9. 1033;10. V;11. GTG
ERS451417_01950	1717.62.peg.1950	NA	NA	NA	1	38	Cargentoratense_DSM44202,"Catypicum_R2070","Caurimucosum_ATCC700975","Cbelfantii_FRC0043","Ccallunae_DSM20147","Ccamporealensis_DSM44610","Cdeserti_GIMN1010","Cdiphtheriae_NCTC11397","Cdoosanense_DSM45436","Cefficiens_YS314","Cepidermidicanis_DSM45586","Cfalsenii_DSM44353","Cglutamicum_ATCC13032","Cglycinophilum_AJ3170","Chalotolerans_YIM70093","Chumireducens_DSM45392","Cimitans_DSM44264","Cjeike…	0.343006	0.149066	1.60019	0.342997	0.149066	1.60019	2	1	1. 0.87457;2. 299;3. 895;4. 303;5. 303;6. 907;7. 315;8. 943;9. 742;10. R;11. CGC
ERS451417_02293	1717.62.peg.2322	NA	NA	NA	1	30	Cargentoratense_DSM44202,"Catypicum_R2070","Caurimucosum_ATCC700975","Cbelfantii_FRC0043","Ccallunae_DSM20147","Ccamporealensis_DSM44610","Cdeserti_GIMN1010","Cdiphtheriae_NCTC11397","Cefficiens_YS314","Cepidermidicanis_DSM45586","Cfalsenii_DSM44353","Cglutamicum_ATCC13032","Chumireducens_DSM45392","Cimitans_DSM44264","Ckroppenstedtii_DSM44385","Ckutscheri_DSM20755","Clactis_RW25","Cmarinum_DSM44…	0.17009	0.17009	1.72518	0.17009	0.17009	1.72518	258	0
ERS451417_00152	1717.62.peg.149	NA	NA	NA	1	38	Cargentoratense_DSM44202,"Catypicum_R2070","Caurimucosum_ATCC700975","Cbelfantii_FRC0043","Ccallunae_DSM20147","Ccamporealensis_DSM44610","Cdeserti_GIMN1010","Cdiphtheriae_NCTC11397","Cdoosanense_DSM45436","Cefficiens_YS314","Cepidermidicanis_DSM45586","Cfalsenii_DSM44353","Cglutamicum_ATCC13032","Cglycinophilum_AJ3170","Chalotolerans_YIM70093","Chumireducens_DSM45392","Cimitans_DSM44264","Cjeike…	0.121218	0.121218	2.07237	0.121218	0.121218	2.07237	1282	0
ERS451417_02395	1717.62.peg.2427	NA	NA	NA	1	5	Cbelfantii_FRC0043,"Cdiphtheriae_NCTC11397","Cpseudotuberculosis_ATCC19410","Csilvaticum_KL0182","Culcerans_NCTC12077"	0.720315	0.0984485	3.06325	0.433455	0.0958762	3.12759	4098	1	1. 0.97435;2. 138;3. 412;4. 250;5. 184;6. 550;7. 221;8. 661;9. 331;10. S;11. TCC
ERS451417_01214	1717.62.peg.1222	NA	NA	NA	1	26	Cargentoratense_DSM44202,"Caurimucosum_ATCC700975","Ccamporealensis_DSM44610","Cdiphtheriae_NCTC11397","Cdoosanense_DSM45436","Cepidermidicanis_DSM45586","Chalotolerans_YIM70093","Chumireducens_DSM45392","Cimitans_DSM44264","Cjeikeium_K41","Cmarinum_DSM44953","Cmaris_DSM45190","Cmustelae_DSM45274","Cpseudotuberculosis_31","Cpseudotuberculosis_ATCC19410","CriegeliiPUDD83A45","Crouxii_FRC0190","Csi…	1	0.227189	1.67242	1	0.227189	1.67242	3072	1	1. 0.94851;2. 329;3. 985;4. 396;5. 354;6. 1060;7. 483;8. 1447;9. 751;10. E;11. GAA
ERS451417_00462	1717.62.peg.466	NA	NA	NA	1	39	Cargentoratense_DSM44202,"Catypicum_R2070","Caurimucosum_ATCC700975","Cbelfantii_FRC0043","Ccallunae_DSM20147","Ccamporealensis_DSM44610","Cdeserti_GIMN1010","Cdiphtheriae_NCTC11397","Cdoosanense_DSM45436","Cefficiens_YS314","Cepidermidicanis_DSM45586","Cfalsenii_DSM44353","Cglutamicum_ATCC13032","Cglycinophilum_AJ3170","Chalotolerans_YIM70093","Chumireducens_DSM45392","Cimitans_DSM44264","Cjeike…	0.17386	0.17386	1.33348	0.17386	0.17386	1.33348	258	0
ERS451417_00883	1717.62.peg.889	NA	NA	NA	1	38	Cargentoratense_DSM44202,"Catypicum_R2070","Caurimucosum_ATCC700975","Cbelfantii_FRC0043","Ccallunae_DSM20147","Ccamporealensis_DSM44610","Cdeserti_GIMN1010","Cdiphtheriae_NCTC11397","Cdoosanense_DSM45436","Cefficiens_YS314","Cepidermidicanis_DSM45586","Cfalsenii_DSM44353","Cglutamicum_ATCC13032","Cglycinophilum_AJ3170","Chalotolerans_YIM70093","Chumireducens_DSM45392","Cimitans_DSM44264","Cjeike…	0.163223	0.163223	1.67793	0.163223	0.163223	1.67794	3330	0
ERS451417_01252	1717.62.peg.1260	NA	NA	NA	1	8	Cbelfantii_FRC0043,"Cdiphtheriae_NCTC11397","Cpseudotuberculosis_31","Cpseudotuberculosis_ATCC19410","Crouxii_FRC0190","Csilvaticum_KL0182","Culcerans_NCTC12077","Culcerans_NCTC7910"	0.06166	0.06166	4.11545	0.06166	0.06166	4.11546	1282	0
ERS451417_00301	1717.62.peg.302	NA	NA	NA	1	8	Cbelfantii_FRC0043,"Cdiphtheriae_NCTC11397","Cpseudotuberculosis_31","Cpseudotuberculosis_ATCC19410","Crouxii_FRC0190","Csilvaticum_KL0182","Culcerans_NCTC12077","Culcerans_NCTC7910"	0.276044	0.139119	2.63477	0.276044	0.139119	2.63477	2	3	1. 0.78596;2. 20;3. 58;4. 111;5. 20;6. 58;7. 22;8. 64;9. 49;10. A;11. GCC	1. 0.68411;2. 68;3. 202;4. 174;5. 73;6. 217;7. 75;8. 223;9. 184;10. L;11. CTA	1. 0.68484;2. 102;3. 304;4. 227;5. 122;6. 364;7. 124;8. 370;9. 283;10. E;11. GAG
ERS451417_01473	1717.62.peg.1483	NA	NA	NA	1	38	Cargentoratense_DSM44202,"Catypicum_R2070","Caurimucosum_ATCC700975","Cbelfantii_FRC0043","Ccallunae_DSM20147","Ccamporealensis_DSM44610","Cdeserti_GIMN1010","Cdiphtheriae_NCTC11397","Cdoosanense_DSM45436","Cefficiens_YS314","Cepidermidicanis_DSM45586","Cfalsenii_DSM44353","Cglutamicum_ATCC13032","Cglycinophilum_AJ3170","Chalotolerans_YIM70093","Chumireducens_DSM45392","Cimitans_DSM44264","Cjeike…	0.0558929	0.0558929	1.98945	0.0558929	0.0558929	1.98945	1282	0
ERS451417_02273	1717.62.peg.2302	NA	NA	NA	1	15	Caurimucosum_ATCC700975,"Ccamporealensis_DSM44610","Cdiphtheriae_NCTC11397","Ckutscheri_DSM20755","Cmustelae_DSM45274","Cpseudotuberculosis_31","Cpseudotuberculosis_ATCC19410","CriegeliiPUDD83A45","Csilvaticum_KL0182","Csimulans_PES1","Csingulare_IBSB52218","Culcerans_NCTC12077","Culcerans_NCTC7910","Cureicelerivorans_IMMIBRIV2301","Cvitaeruminis_DSM20294"	0.14479	0.14479	1.98714	0.14479	0.14479	1.98714	3330	0
ERS451417_01141	1717.62.peg.1152	NA	NA	NA	1	39	Cargentoratense_DSM44202,"Catypicum_R2070","Caurimucosum_ATCC700975","Cbelfantii_FRC0043","Ccallunae_DSM20147","Ccamporealensis_DSM44610","Cdeserti_GIMN1010","Cdiphtheriae_NCTC11397","Cdoosanense_DSM45436","Cefficiens_YS314","Cepidermidicanis_DSM45586","Cfalsenii_DSM44353","Cglutamicum_ATCC13032","Cglycinophilum_AJ3170","Chalotolerans_YIM70093","Chumireducens_DSM45392","Cimitans_DSM44264","Cjeike…	0.0818391	0.0818391	2.0128	0.0818391	0.0818391	2.01279	258	0
ERS451417_00854	1717.62.peg.859	NA	NA	NA	1	18	Ccallunae_DSM20147,"Cdeserti_GIMN1010","Cdiphtheriae_NCTC11397","Cefficiens_YS314","Cglutamicum_ATCC13032","Chalotolerans_YIM70093","Chumireducens_DSM45392","Clactis_RW25","Cmarinum_DSM44953","Cmaris_DSM45190","Cmustelae_DSM45274","Cpseudotuberculosis_31","Cpseudotuberculosis_ATCC19410","Crouxii_FRC0190","Ctestudinoris_DSM44614","Culcerans_NCTC12077","Culcerans_NCTC7910","Cvitaeruminis_DSM20294"	0.257071	0.257071	1.65811	0.257071	0.257071	1.65812	2306	0
ERS451417_01233	1717.62.peg.1241	NA	NA	NA	1	14	Cargentoratense_DSM44202,"Cbelfantii_FRC0043","Cdiphtheriae_NCTC11397","Cepidermidicanis_DSM45586","Ckutscheri_DSM20755","Clactis_RW25","Cmustelae_DSM45274","Cpseudotuberculosis_31","Cpseudotuberculosis_ATCC19410","Crouxii_FRC0190","Csilvaticum_KL0182","Culcerans_NCTC12077","Culcerans_NCTC7910","Cvitaeruminis_DSM20294"	0.256731	0.152534	2.85762	0.256731	0.152534	2.85762	2	2	1. 0.78535;2. 304;3. 910;4. 353;5. 353;6. 1057;7. 455;8. 1363;9. 712;10. S;11. TCT	1. 0.77589;2. 461;3. 1381;4. 510;5. 510;6. 1528;7. 612;8. 1834;9. 1183;10. D;11. GAC
ERS451417_00942	1717.62.peg.949	NA	NA	NA	1	30	Cargentoratense_DSM44202,"Catypicum_R2070","Caurimucosum_ATCC700975","Cbelfantii_FRC0043","Ccamporealensis_DSM44610","Cdiphtheriae_NCTC11397","Cdoosanense_DSM45436","Cepidermidicanis_DSM45586","Cglycinophilum_AJ3170","Chalotolerans_YIM70093","Chumireducens_DSM45392","Cimitans_DSM44264","Ckroppenstedtii_DSM44385","Ckutscheri_DSM20755","Clactis_RW25","Cmarinum_DSM44953","Cmustelae_DSM45274","Cpseud…	0.122431	0.122431	1.76125	0.122431	0.122431	1.76125	258	0
ERS451417_01975	1717.62.peg.1975	NA	NA	NA	1	35	Cargentoratense_DSM44202,"Catypicum_R2070","Caurimucosum_ATCC700975","Cbelfantii_FRC0043","Ccallunae_DSM20147","Ccamporealensis_DSM44610","Cdeserti_GIMN1010","Cdiphtheriae_NCTC11397","Cdoosanense_DSM45436","Cefficiens_YS314","Cepidermidicanis_DSM45586","Cfalsenii_DSM44353","Cglutamicum_ATCC13032","Cglycinophilum_AJ3170","Chalotolerans_YIM70093","Chumireducens_DSM45392","Cimitans_DSM44264","Cjeike…	0.316791	0.108593	1.72099	0.316791	0.108593	1.72099	3074	1	1. 0.87086;2. 89;3. 265;4. 102;5. 102;6. 304;7. 124;8. 370;9. 157;10. E;11. GAG
ERS451417_02387	1717.62.peg.2419	NA	NA	NA	1	18	Caurimucosum_ATCC700975,"Cbelfantii_FRC0043","Ccamporealensis_DSM44610","Cdiphtheriae_NCTC11397","Cdoosanense_DSM45436","Chalotolerans_YIM70093","Chumireducens_DSM45392","Cmarinum_DSM44953","Cmaris_DSM45190","Cmustelae_DSM45274","Cpseudotuberculosis_31","Cpseudotuberculosis_ATCC19410","Csilvaticum_KL0182","Csimulans_PES1","Csingulare_IBSB52218","Ctestudinoris_DSM44614","Culcerans_NCTC7910","Cvita…	0.245565	0.245565	1.98425	0.245565	0.245565	1.98425	258	0
ERS451417_01891	1717.62.peg.1890	NA	NA	NA	1	38	Cargentoratense_DSM44202,"Catypicum_R2070","Caurimucosum_ATCC700975","Cbelfantii_FRC0043","Ccallunae_DSM20147","Ccamporealensis_DSM44610","Cdeserti_GIMN1010","Cdiphtheriae_NCTC11397","Cdoosanense_DSM45436","Cefficiens_YS314","Cepidermidicanis_DSM45586","Cfalsenii_DSM44353","Cglutamicum_ATCC13032","Cglycinophilum_AJ3170","Chalotolerans_YIM70093","Chumireducens_DSM45392","Cimitans_DSM44264","Cjeike…	0.261532	0.16442	2.04457	0.261561	0.16442	2.04457	2	1	1. 0.76028;2. 243;3. 727;4. 247;5. 247;6. 739;7. 257;8. 769;9. 535;10. A;11. GCA
ERS451417_01042	1717.62.peg.1052	NA	NA	NA	1	39	Cargentoratense_DSM44202,"Catypicum_R2070","Caurimucosum_ATCC700975","Cbelfantii_FRC0043","Ccallunae_DSM20147","Ccamporealensis_DSM44610","Cdeserti_GIMN1010","Cdiphtheriae_NCTC11397","Cdoosanense_DSM45436","Cefficiens_YS314","Cepidermidicanis_DSM45586","Cfalsenii_DSM44353","Cglutamicum_ATCC13032","Cglycinophilum_AJ3170","Chalotolerans_YIM70093","Chumireducens_DSM45392","Cimitans_DSM44264","Cjeike…	0.689788	0.130615	1.91317	0.689721	0.130615	1.91317	2	2	1. 0.93378;2. 204;3. 610;4. 230;5. 230;6. 688;7. 296;8. 886;9. 568;10. T;11. ACC	1. 0.9356;2. 440;3. 1318;4. 466;5. 466;6. 1396;7. 533;8. 1597;9. 1246;10. S;11. TCC
ERS451417_01783	1717.62.peg.1788	NA	NA	NA	1	19	Cbelfantii_FRC0043,"Ccallunae_DSM20147","Ccamporealensis_DSM44610","Cdiphtheriae_NCTC11397","Cdoosanense_DSM45436","Cglutamicum_ATCC13032","Ckutscheri_DSM20755","Cmarinum_DSM44953","Cmaris_DSM45190","Cpseudotuberculosis_31","Cpseudotuberculosis_ATCC19410","Csilvaticum_KL0182","Csimulans_PES1","Csingulare_IBSB52218","Ctestudinoris_DSM44614","Culcerans_NCTC12077","Culcerans_NCTC7910","Cuterequi_DSM…	0.197819	0.197819	1.67477	0.197829	0.197819	1.67477	258	0
ERS451417_02276	1717.62.peg.2305	NA	NA	NA	1	23	Catypicum_R2070,"Caurimucosum_ATCC700975","Cbelfantii_FRC0043","Ccallunae_DSM20147","Ccamporealensis_DSM44610","Cdeserti_GIMN1010","Cdiphtheriae_NCTC11397","Cdoosanense_DSM45436","Cglutamicum_ATCC13032","Chalotolerans_YIM70093","Chumireducens_DSM45392","Cmarinum_DSM44953","Cmaris_DSM45190","Cmustelae_DSM45274","Cpseudotuberculosis_31","Cpseudotuberculosis_ATCC19410","Csilvaticum_KL0182","Csimulan…	0.17423	0.17423	1.56583	0.17423	0.17423	1.56583	3330	0
ERS451417_01954	1717.62.peg.1954	NA	NA	NA	1	26	Cargentoratense_DSM44202,"Catypicum_R2070","Caurimucosum_ATCC700975","Cbelfantii_FRC0043","Ccallunae_DSM20147","Cdiphtheriae_NCTC11397","Cepidermidicanis_DSM45586","Cfalsenii_DSM44353","Cglycinophilum_AJ3170","Cimitans_DSM44264","Cjeikeium_K41","Ckroppenstedtii_DSM44385","Clactis_RW25","Cmarinum_DSM44953","Cpseudotuberculosis_31","Cpseudotuberculosis_ATCC19410","CriegeliiPUDD83A45","Csilvaticum_K…	0.282402	0.282402	1.65257	0.282402	0.282402	1.65257	3330	0
ERS451417_00661	1717.62.peg.665	NA	NA	NA	1	36	Catypicum_R2070,"Caurimucosum_ATCC700975","Cbelfantii_FRC0043","Ccallunae_DSM20147","Ccamporealensis_DSM44610","Cdeserti_GIMN1010","Cdiphtheriae_NCTC11397","Cdoosanense_DSM45436","Cefficiens_YS314","Cepidermidicanis_DSM45586","Cfalsenii_DSM44353","Cglutamicum_ATCC13032","Chalotolerans_YIM70093","Chumireducens_DSM45392","Cimitans_DSM44264","Cjeikeium_K41","Ckroppenstedtii_DSM44385","Ckutscheri_DSM…	0.248735	0.248735	1.556	0.248735	0.248735	1.556	3330	0
ERS451417_01951	1717.62.peg.1951	NA	NA	NA	1	38	Cargentoratense_DSM44202,"Catypicum_R2070","Caurimucosum_ATCC700975","Cbelfantii_FRC0043","Ccallunae_DSM20147","Ccamporealensis_DSM44610","Cdeserti_GIMN1010","Cdiphtheriae_NCTC11397","Cdoosanense_DSM45436","Cefficiens_YS314","Cepidermidicanis_DSM45586","Cfalsenii_DSM44353","Cglutamicum_ATCC13032","Cglycinophilum_AJ3170","Chalotolerans_YIM70093","Chumireducens_DSM45392","Cimitans_DSM44264","Cjeike…	0.127699	0.127699	1.85499	0.127699	0.127699	1.85499	258	0
ERS451417_00400	1717.62.peg.400	NA	NA	NA	1	39	Cargentoratense_DSM44202,"Catypicum_R2070","Caurimucosum_ATCC700975","Cbelfantii_FRC0043","Ccallunae_DSM20147","Ccamporealensis_DSM44610","Cdeserti_GIMN1010","Cdiphtheriae_NCTC11397","Cdoosanense_DSM45436","Cefficiens_YS314","Cepidermidicanis_DSM45586","Cfalsenii_DSM44353","Cglutamicum_ATCC13032","Cglycinophilum_AJ3170","Chalotolerans_YIM70093","Chumireducens_DSM45392","Cimitans_DSM44264","Cjeike…	0.32119	0.0674612	2.85346	0.160862	0.0674612	2.85346	258	0
ERS451417_01585	1717.62.peg.1594	NA	NA	NA	1	6	Cdiphtheriae_NCTC11397,"Cpseudotuberculosis_31","Cpseudotuberculosis_ATCC19410","Culcerans_NCTC12077","Culcerans_NCTC7910","Cvitaeruminis_DSM20294"	0.281519	0.06388	3.13855	0.281519	0.06388	3.13855	2050	1	1. 0.82836;2. 24;3. 70;4. 34;5. 24;6. 70;7. 29;8. 85;9. 22;10. V;11. GTG
1717.62.peg.556	1717.62.peg.556	NA	NA	NA	1	25	Caurimucosum_ATCC700975,"Cbelfantii_FRC0043","Ccallunae_DSM20147","Ccamporealensis_DSM44610","Cdiphtheriae_NCTC11397","Cdoosanense_DSM45436","Cefficiens_YS314","Cglutamicum_ATCC13032","Chalotolerans_YIM70093","Cimitans_DSM44264","Ckutscheri_DSM20755","Cmarinum_DSM44953","Cmaris_DSM45190","Cmustelae_DSM45274","Cpseudotuberculosis_ATCC19410","CriegeliiPUDD83A45","Crouxii_FRC0190","Csilvaticum_KL018…	0.426922	0.426922	1.49229	0.426922	0.426922	1.49229	5378	0
ERS451417_01177	1717.62.peg.1186	NA	NA	NA	1	39	Cargentoratense_DSM44202,"Catypicum_R2070","Caurimucosum_ATCC700975","Cbelfantii_FRC0043","Ccallunae_DSM20147","Ccamporealensis_DSM44610","Cdeserti_GIMN1010","Cdiphtheriae_NCTC11397","Cdoosanense_DSM45436","Cefficiens_YS314","Cepidermidicanis_DSM45586","Cfalsenii_DSM44353","Cglutamicum_ATCC13032","Cglycinophilum_AJ3170","Chalotolerans_YIM70093","Chumireducens_DSM45392","Cimitans_DSM44264","Cjeike…	0.228173	0.228173	1.87052	0.228173	0.228173	1.87053	3330	0
ERS451417_00365	1717.62.peg.364	NA	NA	NA	1	22	Catypicum_R2070,"Caurimucosum_ATCC700975","Cbelfantii_FRC0043","Ccamporealensis_DSM44610","Cdiphtheriae_NCTC11397","Cepidermidicanis_DSM45586","Cimitans_DSM44264","Cjeikeium_K41","Ckutscheri_DSM20755","Clactis_RW25","Cmustelae_DSM45274","Cpseudotuberculosis_31","Cpseudotuberculosis_ATCC19410","CriegeliiPUDD83A45","Crouxii_FRC0190","Csilvaticum_KL0182","Csimulans_PES1","Csingulare_IBSB52218","Ctes…	0.566667	0.171432	2.01204	0.566667	0.171432	2.01204	1026	1	1. 0.87984;2. 162;3. 484;4. 179;5. 168;6. 502;7. 169;8. 505;9. 448;10. L;11. CTT
ERS451417_01045	1717.62.peg.1055	NA	NA	NA	1	39	Cargentoratense_DSM44202,"Catypicum_R2070","Caurimucosum_ATCC700975","Cbelfantii_FRC0043","Ccallunae_DSM20147","Ccamporealensis_DSM44610","Cdeserti_GIMN1010","Cdiphtheriae_NCTC11397","Cdoosanense_DSM45436","Cefficiens_YS314","Cepidermidicanis_DSM45586","Cfalsenii_DSM44353","Cglutamicum_ATCC13032","Cglycinophilum_AJ3170","Chalotolerans_YIM70093","Chumireducens_DSM45392","Cimitans_DSM44264","Cjeike…	0.299111	0.242625	1.54525	0.299111	0.242625	1.54525	2	1	1. 0.79705;2. 43;3. 127;4. 104;5. 104;6. 310;7. 145;8. 433;9. 85;10. H;11. CAC
ERS451417_01782	1717.62.peg.1787	NA	NA	NA	1	38	Cargentoratense_DSM44202,"Catypicum_R2070","Caurimucosum_ATCC700975","Cbelfantii_FRC0043","Ccallunae_DSM20147","Ccamporealensis_DSM44610","Cdeserti_GIMN1010","Cdiphtheriae_NCTC11397","Cdoosanense_DSM45436","Cefficiens_YS314","Cepidermidicanis_DSM45586","Cfalsenii_DSM44353","Cglutamicum_ATCC13032","Cglycinophilum_AJ3170","Chalotolerans_YIM70093","Chumireducens_DSM45392","Cimitans_DSM44264","Cjeike…	0.656134	0.231982	1.39496	0.365021	0.231982	1.39496	258	0
ERS451417_00796	1717.62.peg.802	NA	NA	NA	1	39	Cargentoratense_DSM44202,"Catypicum_R2070","Caurimucosum_ATCC700975","Cbelfantii_FRC0043","Ccallunae_DSM20147","Ccamporealensis_DSM44610","Cdeserti_GIMN1010","Cdiphtheriae_NCTC11397","Cdoosanense_DSM45436","Cefficiens_YS314","Cepidermidicanis_DSM45586","Cfalsenii_DSM44353","Cglutamicum_ATCC13032","Cglycinophilum_AJ3170","Chalotolerans_YIM70093","Chumireducens_DSM45392","Cimitans_DSM44264","Cjeike…	0.135826	0.0981736	1.96475	0.135816	0.0981733	1.96475	2	1	1. 0.6901;2. 146;3. 436;4. 160;5. 160;6. 478;7. 181;8. 541;9. 391;10. I;11. ATC
ERS451417_00095	1717.62.peg.93	NA	NA	NA	1	11	Cbelfantii_FRC0043,"Cdiphtheriae_NCTC11397","Cglutamicum_ATCC13032","Cglycinophilum_AJ3170","Cpseudotuberculosis_31","Cpseudotuberculosis_ATCC19410","Crouxii_FRC0190","Csilvaticum_KL0182","Cterpenotabidum_Y11","Culcerans_NCTC12077","Culcerans_NCTC7910"	0.119403	0.0739478	1.93997	0.119403	0.0739478	1.93997	2050	1	1. 0.70255;2. 249;3. 745;4. 286;5. 277;6. 829;7. 293;8. 877;9. 598;10. T;11. ACT
ERS451417_00122	1717.62.peg.120	NA	NA	NA	1	8	Cbelfantii_FRC0043,"Cdiphtheriae_NCTC11397","Cpseudotuberculosis_31","Cpseudotuberculosis_ATCC19410","Crouxii_FRC0190","Csilvaticum_KL0182","Culcerans_NCTC12077","Culcerans_NCTC7910"	0.203829	0.203829	3.86098	0.203829	0.203829	3.86097	2306	0
ERS451417_00870	1717.62.peg.875	NA	NA	NA	1	32	Cargentoratense_DSM44202,"Catypicum_R2070","Caurimucosum_ATCC700975","Cbelfantii_FRC0043","Ccallunae_DSM20147","Ccamporealensis_DSM44610","Cdeserti_GIMN1010","Cdiphtheriae_NCTC11397","Cdoosanense_DSM45436","Cefficiens_YS314","Cepidermidicanis_DSM45586","Cglutamicum_ATCC13032","Chalotolerans_YIM70093","Chumireducens_DSM45392","Cimitans_DSM44264","Ckutscheri_DSM20755","Cmarinum_DSM44953","Cmaris_DS…	0.0986036	0.0986036	1.82729	0.0986036	0.0986036	1.82729	2306	0
ERS451417_02370	1717.62.peg.2400	NA	NA	NA	1	8	Caurimucosum_ATCC700975,"Cbelfantii_FRC0043","Cdiphtheriae_NCTC11397","Cpseudotuberculosis_31","Cpseudotuberculosis_ATCC19410","Csilvaticum_KL0182","Culcerans_NCTC12077","Culcerans_NCTC7910"	0.182633	0.182633	2.49044	0.182633	0.182633	2.49044	2306	0
ERS451417_00735	1717.62.peg.738	NA	NA	NA	1	9	Catypicum_R2070,"Cbelfantii_FRC0043","Cdiphtheriae_NCTC11397","Cpseudotuberculosis_31","Cpseudotuberculosis_ATCC19410","Crouxii_FRC0190","Csilvaticum_KL0182","Culcerans_NCTC12077","Culcerans_NCTC7910"	0.198245	0.198245	2.77054	0.198245	0.198245	2.77054	258	0
ERS451417_01037	1717.62.peg.1047	NA	NA	NA	1	32	Caurimucosum_ATCC700975,"Cbelfantii_FRC0043","Ccallunae_DSM20147","Ccamporealensis_DSM44610","Cdeserti_GIMN1010","Cdiphtheriae_NCTC11397","Cdoosanense_DSM45436","Cefficiens_YS314","Cfalsenii_DSM44353","Cglutamicum_ATCC13032","Cglycinophilum_AJ3170","Chalotolerans_YIM70093","Chumireducens_DSM45392","Cimitans_DSM44264","Cjeikeium_K41","Ckutscheri_DSM20755","Clactis_RW25","Cmarinum_DSM44953","Cmaris…	0.244615	0.244615	1.62319	0.244615	0.244615	1.62319	3330	0
ERS451417_02128	1717.62.peg.2146	NA	NA	NA	1	38	Cargentoratense_DSM44202,"Catypicum_R2070","Caurimucosum_ATCC700975","Cbelfantii_FRC0043","Ccallunae_DSM20147","Ccamporealensis_DSM44610","Cdeserti_GIMN1010","Cdiphtheriae_NCTC11397","Cdoosanense_DSM45436","Cefficiens_YS314","Cepidermidicanis_DSM45586","Cfalsenii_DSM44353","Cglutamicum_ATCC13032","Cglycinophilum_AJ3170","Chalotolerans_YIM70093","Chumireducens_DSM45392","Cimitans_DSM44264","Cjeike…	0.13147	0.119837	1.88465	0.13147	0.119837	1.88465	2	2	1. 0.66588;2. 750;3. 2248;4. 756;5. 756;6. 2266;7. 776;8. 2326;9. 2185;10. V;11. GTG	1. 0.66875;2. 789;3. 2365;4. 795;5. 795;6. 2383;7. 815;8. 2443;9. 2281;10. K;11. AAG
ERS451417_00846	1717.62.peg.851	NA	NA	NA	1	39	Cargentoratense_DSM44202,"Catypicum_R2070","Caurimucosum_ATCC700975","Cbelfantii_FRC0043","Ccallunae_DSM20147","Ccamporealensis_DSM44610","Cdeserti_GIMN1010","Cdiphtheriae_NCTC11397","Cdoosanense_DSM45436","Cefficiens_YS314","Cepidermidicanis_DSM45586","Cfalsenii_DSM44353","Cglutamicum_ATCC13032","Cglycinophilum_AJ3170","Chalotolerans_YIM70093","Chumireducens_DSM45392","Cimitans_DSM44264","Cjeike…	0.189714	0.189714	1.77796	0.189714	0.189714	1.77796	258	0
ERS451417_01822	1717.62.peg.1827	NA	NA	NA	1	38	Cargentoratense_DSM44202,"Catypicum_R2070","Caurimucosum_ATCC700975","Cbelfantii_FRC0043","Ccallunae_DSM20147","Ccamporealensis_DSM44610","Cdeserti_GIMN1010","Cdiphtheriae_NCTC11397","Cdoosanense_DSM45436","Cefficiens_YS314","Cepidermidicanis_DSM45586","Cfalsenii_DSM44353","Cglutamicum_ATCC13032","Cglycinophilum_AJ3170","Chalotolerans_YIM70093","Chumireducens_DSM45392","Cimitans_DSM44264","Cjeike…	1.0046	0.0910538	1.87733	0.973051	0.0910538	1.87733	256	0
ERS451417_01697	1717.62.peg.1704	NA	NA	NA	1	15	Cargentoratense_DSM44202,"Cbelfantii_FRC0043","Cdiphtheriae_NCTC11397","Cefficiens_YS314","Cepidermidicanis_DSM45586","Ckroppenstedtii_DSM44385","Ckutscheri_DSM20755","Clactis_RW25","Cmustelae_DSM45274","Cpseudotuberculosis_31","Cpseudotuberculosis_ATCC19410","Csilvaticum_KL0182","Culcerans_NCTC12077","Culcerans_NCTC7910","Cvitaeruminis_DSM20294"	3.75691	0.328326	2.1569	0.986072	0.328326	2.1569	3328	0
ERS451417_00458	1717.62.peg.462	NA	NA	NA	1	39	Cargentoratense_DSM44202,"Catypicum_R2070","Caurimucosum_ATCC700975","Cbelfantii_FRC0043","Ccallunae_DSM20147","Ccamporealensis_DSM44610","Cdeserti_GIMN1010","Cdiphtheriae_NCTC11397","Cdoosanense_DSM45436","Cefficiens_YS314","Cepidermidicanis_DSM45586","Cfalsenii_DSM44353","Cglutamicum_ATCC13032","Cglycinophilum_AJ3170","Chalotolerans_YIM70093","Chumireducens_DSM45392","Cimitans_DSM44264","Cjeike…	0.199433	0.199433	1.86961	0.199423	0.199423	1.86962	258	0
ERS451417_01316	1717.62.peg.1324	NA	NA	NA	1	36	Catypicum_R2070,"Caurimucosum_ATCC700975","Cbelfantii_FRC0043","Ccallunae_DSM20147","Ccamporealensis_DSM44610","Cdeserti_GIMN1010","Cdiphtheriae_NCTC11397","Cdoosanense_DSM45436","Cefficiens_YS314","Cepidermidicanis_DSM45586","Cfalsenii_DSM44353","Cglutamicum_ATCC13032","Cglycinophilum_AJ3170","Chalotolerans_YIM70093","Chumireducens_DSM45392","Cimitans_DSM44264","Cjeikeium_K41","Ckroppenstedtii_D…	0.881511	0.215787	1.63792	0.881557	0.215787	1.63792	1024	1	1. 0.92674;2. 72;3. 214;4. 78;5. 78;6. 232;7. 84;8. 250;9. 169;10. D;11. GAT
ERS451417_00740	1717.62.peg.743	NA	NA	NA	1	34	Cargentoratense_DSM44202,"Catypicum_R2070","Caurimucosum_ATCC700975","Cbelfantii_FRC0043","Ccamporealensis_DSM44610","Cdeserti_GIMN1010","Cdiphtheriae_NCTC11397","Cdoosanense_DSM45436","Cefficiens_YS314","Cepidermidicanis_DSM45586","Cfalsenii_DSM44353","Cglutamicum_ATCC13032","Cglycinophilum_AJ3170","Chalotolerans_YIM70093","Chumireducens_DSM45392","Cimitans_DSM44264","Cjeikeium_K41","Clactis_RW2…	0.362849	0.362849	1.75061	0.362849	0.362849	1.75061	3330	0
ERS451417_01513	1717.62.peg.1521	NA	NA	NA	1	14	Cargentoratense_DSM44202,"Cbelfantii_FRC0043","Cdiphtheriae_NCTC11397","Cepidermidicanis_DSM45586","Ckroppenstedtii_DSM44385","Ckutscheri_DSM20755","Clactis_RW25","Cmustelae_DSM45274","Cpseudotuberculosis_31","Cpseudotuberculosis_ATCC19410","Csilvaticum_KL0182","Culcerans_NCTC12077","Culcerans_NCTC7910","Cvitaeruminis_DSM20294"	0.152982	0.152982	2.21958	0.152982	0.152982	2.21958	3330	0
ERS451417_01274	1717.62.peg.1282	NA	NA	NA	1	17	Cargentoratense_DSM44202,"Cbelfantii_FRC0043","Cdiphtheriae_NCTC11397","Cefficiens_YS314","Cepidermidicanis_DSM45586","Cglutamicum_ATCC13032","Ckroppenstedtii_DSM44385","Ckutscheri_DSM20755","Clactis_RW25","Cmustelae_DSM45274","Cpseudotuberculosis_31","Cpseudotuberculosis_ATCC19410","Crouxii_FRC0190","Csilvaticum_KL0182","Culcerans_NCTC12077","Culcerans_NCTC7910","Cvitaeruminis_DSM20294"	1	0.237384	2.08753	1	0.237384	2.08753	2048	1	1. 0.93124;2. 512;3. 1534;4. 541;5. 541;6. 1621;7. 633;8. 1897;9. 1198;10. T;11. ACA
ERS451417_00483	1717.62.peg.486	NA	NA	NA	1	39	Cargentoratense_DSM44202,"Catypicum_R2070","Caurimucosum_ATCC700975","Cbelfantii_FRC0043","Ccallunae_DSM20147","Ccamporealensis_DSM44610","Cdeserti_GIMN1010","Cdiphtheriae_NCTC11397","Cdoosanense_DSM45436","Cefficiens_YS314","Cepidermidicanis_DSM45586","Cfalsenii_DSM44353","Cglutamicum_ATCC13032","Cglycinophilum_AJ3170","Chalotolerans_YIM70093","Chumireducens_DSM45392","Cimitans_DSM44264","Cjeike…	0.094854	0.094854	1.99015	0.094854	0.094854	1.99015	258	0
ERS451417_01363	1717.62.peg.1371	NA	NA	NA	1	30	Cargentoratense_DSM44202,"Caurimucosum_ATCC700975","Cbelfantii_FRC0043","Ccallunae_DSM20147","Ccamporealensis_DSM44610","Cdeserti_GIMN1010","Cdiphtheriae_NCTC11397","Cdoosanense_DSM45436","Cefficiens_YS314","Cglutamicum_ATCC13032","Cglycinophilum_AJ3170","Chalotolerans_YIM70093","Chumireducens_DSM45392","Cimitans_DSM44264","Ckutscheri_DSM20755","Clactis_RW25","Cmarinum_DSM44953","Cmaris_DSM45190"…	0.257277	0.257277	1.65495	0.257277	0.257277	1.65495	258	0
ERS451417_01052	1717.62.peg.1062	NA	NA	NA	1	27	Cargentoratense_DSM44202,"Catypicum_R2070","Cbelfantii_FRC0043","Ccallunae_DSM20147","Cdeserti_GIMN1010","Cdiphtheriae_NCTC11397","Cefficiens_YS314","Cepidermidicanis_DSM45586","Cfalsenii_DSM44353","Cglutamicum_ATCC13032","Cglycinophilum_AJ3170","Chalotolerans_YIM70093","Chumireducens_DSM45392","Cjeikeium_K41","Cmarinum_DSM44953","Cmaris_DSM45190","Cmustelae_DSM45274","Cpseudotuberculosis_31","Cp…	0.340781	0.340781	1.66812	0.340781	0.340781	1.66812	258	0
ERS451417_02356	1717.62.peg.2384	NA	NA	NA	1	9	Cbelfantii_FRC0043,"Cdiphtheriae_NCTC11397","Ckutscheri_DSM20755","Cpseudotuberculosis_31","Cpseudotuberculosis_ATCC19410","Csilvaticum_KL0182","Culcerans_NCTC12077","Culcerans_NCTC7910","Cvitaeruminis_DSM20294"	0.0853589	0.0853589	2.86551	0.0853589	0.0853589	2.86555	258	0
ERS451417_00778	1717.62.peg.785	NA	NA	NA	1	39	Cargentoratense_DSM44202,"Catypicum_R2070","Caurimucosum_ATCC700975","Cbelfantii_FRC0043","Ccallunae_DSM20147","Ccamporealensis_DSM44610","Cdeserti_GIMN1010","Cdiphtheriae_NCTC11397","Cdoosanense_DSM45436","Cefficiens_YS314","Cepidermidicanis_DSM45586","Cfalsenii_DSM44353","Cglutamicum_ATCC13032","Cglycinophilum_AJ3170","Chalotolerans_YIM70093","Chumireducens_DSM45392","Cimitans_DSM44264","Cjeike…	0.310014	0.1907	1.82928	0.310014	0.1907	1.82928	3074	1	1. 0.76101;2. 187;3. 559;4. 232;5. 232;6. 694;7. 264;8. 790;9. 385;10. K;11. AAG
ERS451417_02287	1717.62.peg.2316	NA	NA	NA	1	26	Catypicum_R2070,"Caurimucosum_ATCC700975","Cbelfantii_FRC0043","Ccallunae_DSM20147","Ccamporealensis_DSM44610","Cdeserti_GIMN1010","Cdiphtheriae_NCTC11397","Cdoosanense_DSM45436","Cefficiens_YS314","Cepidermidicanis_DSM45586","Cglutamicum_ATCC13032","Chalotolerans_YIM70093","Chumireducens_DSM45392","Ckutscheri_DSM20755","Cmarinum_DSM44953","Cmaris_DSM45190","Cpseudotuberculosis_31","Cpseudotuberc…	0.0469233	0.0469233	1.80952	0.0894193	0.046617	1.81028	2	1	1. 0.69422;2. 86;3. 256;4. 140;5. 86;6. 256;7. 86;8. 256;9. 235;10. V;11. GTC
ERS451417_01809	1717.62.peg.1815	NA	NA	NA	1	38	Cargentoratense_DSM44202,"Catypicum_R2070","Caurimucosum_ATCC700975","Cbelfantii_FRC0043","Ccallunae_DSM20147","Ccamporealensis_DSM44610","Cdeserti_GIMN1010","Cdiphtheriae_NCTC11397","Cdoosanense_DSM45436","Cefficiens_YS314","Cepidermidicanis_DSM45586","Cfalsenii_DSM44353","Cglutamicum_ATCC13032","Cglycinophilum_AJ3170","Chalotolerans_YIM70093","Chumireducens_DSM45392","Cimitans_DSM44264","Cjeike…	0.241448	0.241448	1.57669	0.241448	0.241448	1.5767	1282	0
ERS451417_00086	1717.62.peg.83	NA	NA	NA	1	26	Cbelfantii_FRC0043,"Ccallunae_DSM20147","Ccamporealensis_DSM44610","Cdeserti_GIMN1010","Cdiphtheriae_NCTC11397","Cefficiens_YS314","Cepidermidicanis_DSM45586","Cfalsenii_DSM44353","Cglutamicum_ATCC13032","Cglycinophilum_AJ3170","Chalotolerans_YIM70093","Chumireducens_DSM45392","Cjeikeium_K41","Ckroppenstedtii_DSM44385","Clactis_RW25","Cmarinum_DSM44953","Cmaris_DSM45190","Cpseudotuberculosis_31",…	0.219715	0.143445	1.55137	0.219705	0.143445	1.55137	2	1	1. 0.80832;2. 293;3. 877;4. 316;5. 316;6. 946;7. 341;8. 1021;9. 733;10. K;11. AAG
ERS451417_01285	1717.62.peg.1293	NA	NA	NA	1	20	Cargentoratense_DSM44202,"Catypicum_R2070","Cbelfantii_FRC0043","Ccallunae_DSM20147","Cdeserti_GIMN1010","Cdiphtheriae_NCTC11397","Cglutamicum_ATCC13032","Chalotolerans_YIM70093","Chumireducens_DSM45392","Cimitans_DSM44264","Ckutscheri_DSM20755","Cmarinum_DSM44953","Cpseudotuberculosis_ATCC19410","CriegeliiPUDD83A45","Csilvaticum_KL0182","Ctestudinoris_DSM44614","Culcerans_NCTC12077","Culcerans_N…	0.273482	0.273482	1.66495	0.273482	0.273482	1.66495	6146	1	1. 0.94992;2. 144;3. 430;4. 153;5. 148;6. 442;7. 158;8. 472;9. 292;10. T;11. ACA
ERS451417_01571	1717.62.peg.1580	NA	NA	NA	1	4	Cbelfantii_FRC0043,"Cdiphtheriae_NCTC11397","Cpseudotuberculosis_ATCC19410","Culcerans_NCTC12077"	0.371223	0.371223	4.49608	0.371223	0.371223	4.49602	6146	1	1. 0.49077;2. 63;3. 187;4. 67;5. 64;6. 190;7. 80;8. 238;9. 136;10. D;11. GAT
ERS451417_01741	1717.62.peg.1745	NA	NA	NA	1	38	Cargentoratense_DSM44202,"Catypicum_R2070","Caurimucosum_ATCC700975","Cbelfantii_FRC0043","Ccallunae_DSM20147","Ccamporealensis_DSM44610","Cdeserti_GIMN1010","Cdiphtheriae_NCTC11397","Cdoosanense_DSM45436","Cefficiens_YS314","Cepidermidicanis_DSM45586","Cfalsenii_DSM44353","Cglutamicum_ATCC13032","Cglycinophilum_AJ3170","Chalotolerans_YIM70093","Chumireducens_DSM45392","Cimitans_DSM44264","Cjeike…	0.103661	0.103661	1.47178	0.103661	0.103661	1.47178	258	0
ERS451417_01302	1717.62.peg.1310	NA	NA	NA	1	38	Cargentoratense_DSM44202,"Catypicum_R2070","Caurimucosum_ATCC700975","Cbelfantii_FRC0043","Ccallunae_DSM20147","Ccamporealensis_DSM44610","Cdeserti_GIMN1010","Cdiphtheriae_NCTC11397","Cdoosanense_DSM45436","Cefficiens_YS314","Cepidermidicanis_DSM45586","Cfalsenii_DSM44353","Cglutamicum_ATCC13032","Cglycinophilum_AJ3170","Chalotolerans_YIM70093","Chumireducens_DSM45392","Cimitans_DSM44264","Cjeike…	0.295011	0.172878	1.59604	0.29503	0.172878	1.59604	2	1	1. 0.7468;2. 213;3. 637;4. 229;5. 229;6. 685;7. 254;8. 760;9. 595;10. E;11. GAA
ERS451417_00194	1717.62.peg.191	NA	NA	NA	1	19	Catypicum_R2070,"Cbelfantii_FRC0043","Ccamporealensis_DSM44610","Cdiphtheriae_NCTC11397","Cfalsenii_DSM44353","Ckroppenstedtii_DSM44385","Ckutscheri_DSM20755","Clactis_RW25","Cpseudotuberculosis_31","Cpseudotuberculosis_ATCC19410","CriegeliiPUDD83A45","Crouxii_FRC0190","Csilvaticum_KL0182","Csimulans_PES1","Ctestudinoris_DSM44614","Culcerans_NCTC12077","Culcerans_NCTC7910","Cuterequi_DSM45634","C…	0.178517	0.178517	1.98012	0.178517	0.178517	1.98012	258	0
ERS451417_00961	1717.62.peg.968	NA	NA	NA	1	39	Cargentoratense_DSM44202,"Catypicum_R2070","Caurimucosum_ATCC700975","Cbelfantii_FRC0043","Ccallunae_DSM20147","Ccamporealensis_DSM44610","Cdeserti_GIMN1010","Cdiphtheriae_NCTC11397","Cdoosanense_DSM45436","Cefficiens_YS314","Cepidermidicanis_DSM45586","Cfalsenii_DSM44353","Cglutamicum_ATCC13032","Cglycinophilum_AJ3170","Chalotolerans_YIM70093","Chumireducens_DSM45392","Cimitans_DSM44264","Cjeike…	0.153876	0.153876	1.47423	0.153876	0.153876	1.47423	258	0
ERS451417_02265	1717.62.peg.2294	NA	NA	NA	1	36	Cargentoratense_DSM44202,"Catypicum_R2070","Caurimucosum_ATCC700975","Cbelfantii_FRC0043","Ccallunae_DSM20147","Ccamporealensis_DSM44610","Cdeserti_GIMN1010","Cdiphtheriae_NCTC11397","Cdoosanense_DSM45436","Cefficiens_YS314","Cepidermidicanis_DSM45586","Cfalsenii_DSM44353","Cglutamicum_ATCC13032","Cglycinophilum_AJ3170","Chalotolerans_YIM70093","Chumireducens_DSM45392","Cimitans_DSM44264","Cjeike…	0.262359	0.0950065	1.24404	0.173069	0.0950171	1.24404	258	0
ERS451417_01323	1717.62.peg.1331	NA	NA	NA	1	37	Cargentoratense_DSM44202,"Caurimucosum_ATCC700975","Cbelfantii_FRC0043","Ccallunae_DSM20147","Ccamporealensis_DSM44610","Cdeserti_GIMN1010","Cdiphtheriae_NCTC11397","Cdoosanense_DSM45436","Cefficiens_YS314","Cepidermidicanis_DSM45586","Cfalsenii_DSM44353","Cglutamicum_ATCC13032","Cglycinophilum_AJ3170","Chalotolerans_YIM70093","Chumireducens_DSM45392","Cimitans_DSM44264","Cjeikeium_K41","Ckroppen…	0.990959	0.289351	1.51193	0.289355	0.289355	1.51096	3328	0
ERS451417_02005	1717.62.peg.2009	NA	NA	NA	1	13	Caurimucosum_ATCC700975,"Cbelfantii_FRC0043","Cdiphtheriae_NCTC11397","Cglycinophilum_AJ3170","Cjeikeium_K41","Cpseudotuberculosis_31","Cpseudotuberculosis_ATCC19410","Csilvaticum_KL0182","Csimulans_PES1","Csingulare_IBSB52218","Culcerans_NCTC12077","Culcerans_NCTC7910","Curealyticum_DSM7109"	0.143748	0.143748	1.98858	0.143748	0.143748	1.98858	3330	0
ERS451417_02398	1717.62.peg.2430	NA	NA	NA	1	38	Cargentoratense_DSM44202,"Catypicum_R2070","Caurimucosum_ATCC700975","Cbelfantii_FRC0043","Ccallunae_DSM20147","Ccamporealensis_DSM44610","Cdeserti_GIMN1010","Cdiphtheriae_NCTC11397","Cdoosanense_DSM45436","Cefficiens_YS314","Cepidermidicanis_DSM45586","Cfalsenii_DSM44353","Cglutamicum_ATCC13032","Cglycinophilum_AJ3170","Chalotolerans_YIM70093","Chumireducens_DSM45392","Cimitans_DSM44264","Cjeike…	0.202853	0.202853	1.62287	0.202853	0.202853	1.62287	258	0
ERS451417_01720	1717.62.peg.1723	NA	NA	NA	1	20	Caurimucosum_ATCC700975,"Cbelfantii_FRC0043","Ccallunae_DSM20147","Cdeserti_GIMN1010","Cdiphtheriae_NCTC11397","Cdoosanense_DSM45436","Cefficiens_YS314","Cepidermidicanis_DSM45586","Cglutamicum_ATCC13032","Chalotolerans_YIM70093","Chumireducens_DSM45392","Cmarinum_DSM44953","Cpseudotuberculosis_31","Cpseudotuberculosis_ATCC19410","Csilvaticum_KL0182","Csingulare_IBSB52218","Ctestudinoris_DSM44614…	0.493805	0.247789	1.58063	0.493805	0.247789	1.58063	3074	3	1. 0.65319;2. 85;3. 253;4. 129;5. 117;6. 349;7. 195;8. 583;9. 76;10. E;11. GAA	1. 0.64667;2. 234;3. 700;4. 301;5. 277;6. 829;7. 384;8. 1150;9. 301;10. D;11. GAT	1. 0.6378;2. 534;3. 1600;4. 636;5. 580;6. 1738;7. 686;8. 2056;9. 1198;10. A;11. GCA
ERS451417_01159	1717.62.peg.1170	NA	NA	NA	1	39	Cargentoratense_DSM44202,"Catypicum_R2070","Caurimucosum_ATCC700975","Cbelfantii_FRC0043","Ccallunae_DSM20147","Ccamporealensis_DSM44610","Cdeserti_GIMN1010","Cdiphtheriae_NCTC11397","Cdoosanense_DSM45436","Cefficiens_YS314","Cepidermidicanis_DSM45586","Cfalsenii_DSM44353","Cglutamicum_ATCC13032","Cglycinophilum_AJ3170","Chalotolerans_YIM70093","Chumireducens_DSM45392","Cimitans_DSM44264","Cjeike…	3.73381	0.21895	1.7477	0.219125	0.219125	1.74687	256	0
ERS451417_00474	1717.62.peg.477	NA	NA	NA	1	39	Cargentoratense_DSM44202,"Catypicum_R2070","Caurimucosum_ATCC700975","Cbelfantii_FRC0043","Ccallunae_DSM20147","Ccamporealensis_DSM44610","Cdeserti_GIMN1010","Cdiphtheriae_NCTC11397","Cdoosanense_DSM45436","Cefficiens_YS314","Cepidermidicanis_DSM45586","Cfalsenii_DSM44353","Cglutamicum_ATCC13032","Cglycinophilum_AJ3170","Chalotolerans_YIM70093","Chumireducens_DSM45392","Cimitans_DSM44264","Cjeike…	0.111791	0.111791	1.89618	0.111791	0.111791	1.89618	258	0
ERS451417_00209	1717.62.peg.206	NA	NA	NA	1	6	Cbelfantii_FRC0043,"Cdiphtheriae_NCTC11397","Cmustelae_DSM45274","Cpseudotuberculosis_31","Cpseudotuberculosis_ATCC19410","Crouxii_FRC0190"	0.112753	0.112753	2.86058	0.1594	0.110269	2.8738	2	2	1. 0.65664;2. 16;3. 46;4. 16;5. 16;6. 46;7. 16;8. 46;9. 46;10. A;11. GCG	1. 0.68112;2. 342;3. 1024;4. 342;5. 342;6. 1024;7. 342;8. 1024;9. 1024;10. P;11. CCC
ERS451417_00852	1717.62.peg.857	NA	NA	NA	1	39	Cargentoratense_DSM44202,"Catypicum_R2070","Caurimucosum_ATCC700975","Cbelfantii_FRC0043","Ccallunae_DSM20147","Ccamporealensis_DSM44610","Cdeserti_GIMN1010","Cdiphtheriae_NCTC11397","Cdoosanense_DSM45436","Cefficiens_YS314","Cepidermidicanis_DSM45586","Cfalsenii_DSM44353","Cglutamicum_ATCC13032","Cglycinophilum_AJ3170","Chalotolerans_YIM70093","Chumireducens_DSM45392","Cimitans_DSM44264","Cjeike…	0.125867	0.125867	1.79511	0.125867	0.125867	1.79512	258	0
ERS451417_01985	1717.62.peg.1985	NA	NA	NA	1	13	Catypicum_R2070,"Caurimucosum_ATCC700975","Cbelfantii_FRC0043","Cdiphtheriae_NCTC11397","Cimitans_DSM44264","Ckutscheri_DSM20755","Cpseudotuberculosis_ATCC19410","Csilvaticum_KL0182","Csimulans_PES1","Csingulare_IBSB52218","Culcerans_NCTC12077","Culcerans_NCTC7910","Cvitaeruminis_DSM20294"	0.304252	0.134185	2.47221	0.304252	0.134185	2.47221	4098	43	1. 0.73092;2. 2;3. 4;4. 19;5. 19;6. 55;7. 30;8. 88;9. 1;10. G;11. GGC	1. 0.44344;2. 3;3. 7;4. 20;5. 20;6. 58;7. 31;8. 91;9. 4;10. V;11. GTA	1. 0.52446;2. 13;3. 37;4. 30;5. 30;6. 88;7. 41;8. 121;9. 34;10. M;11. ATG	1. 0.6346;2. 17;3. 49;4. 34;5. 34;6. 100;7. 45;8. 133;9. 46;10. G;11. GGC	1. 0.48148;2. 26;3. 76;4. 43;5. 43;6. 127;7. 54;8. 160;9. 73;10. I;11. ATC	1. 0.75711;2. 31;3. 91;4. 48;5. 48;6. 142;7. 59;8. 175;9. 88;10. R;11. CGC	1. 0.58057;2. 47;3. 139;4. 64;5. 64;6. 190;7. 75;8. 223;9. 136;10. V;11. GTC	1. 0.68346;2. 67;3. 199;4. 84;5. 84;6. 250;7. 95;8. 283;9. 196;10. S;11. TCC	1. 0.74575;2. 85;3. 253;4. 102;5. 102;6. 304;7. 113;8. 337;9. 250;10. H;11. CAC	1. 0.5473;2. 88;3. 262;4. 106;5. 106;6. 316;7. 117;8. 349;9. 256;10. H;11. CAT	1. 0.48579;2. 90;3. 268;4. 108;5. 108;6. 322;7. 119;8. 355;9. 262;10. R;11. CGC	1. 0.64738;2. 98;3. 292;4. 116;5. 116;6. 346;7. 127;8. 379;9. 286;10. A;11. GCT	1. 0.6199;2. 105;3. 313;4. 123;5. 123;6. 367;7. 134;8. 400;9. 307;10. F;11. TTC	1. 0.98444;2. 109;3. 325;4. 127;5. 127;6. 379;7. 138;8. 412;9. 319;10. K;11. AAA	1. 0.41796;2. 114;3. 340;4. 132;5. 132;6. 394;7. 143;8. 427;9. 334;10. I;11. ATC	1. 0.72512;2. 120;3. 358;4. 138;5. 138;6. 412;7. 149;8. 445;9. 352;10. A;11. GCA	1. 0.65639;2. 129;3. 385;4. 147;5. 147;6. 439;7. 158;8. 472;9. 379;10. V;11. GTA	1. 0.78795;2. 138;3. 412;4. 156;5. 156;6. 466;7. 167;8. 499;9. 406;10. A;11. GCC	1. 0.66391;2. 139;3. 415;4. 157;5. 157;6. 469;7. 168;8. 502;9. 409;10. G;11. GGC	1. 0.74786;2. 156;3. 466;4. 174;5. 174;6. 520;7. 185;8. 553;9. 460;10. H;11. CAC	1. 0.57968;2. 159;3. 475;4. 177;5. 177;6. 529;7. 188;8. 562;9. 469;10. R;11. CGC	1. 0.51618;2. 160;3. 478;4. 178;5. 178;6. 532;7. 189;8. 565;9. 472;10. M;11. ATG	1. 0.96927;2. 171;3. 511;4. 189;5. 189;6. 565;7. 200;8. 598;9. 505;10. T;11. ACG	1. 0.48397;2. 238;3. 712;4. 257;5. 256;6. 766;7. 277;8. 829;9. 646;10. I;11. ATT	1. 0.66688;2. 250;3. 748;4. 269;5. 268;6. 802;7. 289;8. 865;9. 682;10. W;11. TGG	1. 0.86347;2. 272;3. 814;4. 294;5. 293;6. 877;7. 318;8. 952;9. 700;10. G;11. GGT	1. 0.55356;2. 277;3. 829;4. 299;5. 298;6. 892;7. 323;8. 967;9. 715;10. V;11. GTG	1. 0.58451;2. 284;3. 850;4. 306;5. 305;6. 913;7. 330;8. 988;9. 736;10. F;11. TTC	1. 0.61862;2. 307;3. 919;4. 329;5. 328;6. 982;7. 353;8. 1057;9. 805;10. R;11. CGC	1. 0.97352;2. 314;3. 940;4. 336;5. 335;6. 1003;7. 360;8. 1078;9. 826;10. G;11. GGA	1. 0.61268;2. 319;3. 955;4. 342;5. 340;6. 1018;7. 365;8. 1093;9. 841;10. F;11. TTC	1. 0.7612;2. 320;3. 958;4. 343;5. 341;6. 1021;7. 366;8. 1096;9. 844;10. A;11. GCG	1. 0.66899;2. 324;3. 970;4. 347;5. 345;6. 1033;7. 370;8. 1108;9. 856;10. G;11. GGC	1. 0.56307;2. 328;3. 982;4. 351;5. 349;6. 1045;7. 374;8. 1120;9. 868;10. I;11. ATC
ERS451417_00863	1717.62.peg.868	NA	NA	NA	1	33	Cargentoratense_DSM44202,"Catypicum_R2070","Caurimucosum_ATCC700975","Cbelfantii_FRC0043","Ccallunae_DSM20147","Ccamporealensis_DSM44610","Cdeserti_GIMN1010","Cdiphtheriae_NCTC11397","Cdoosanense_DSM45436","Cefficiens_YS314","Cepidermidicanis_DSM45586","Cfalsenii_DSM44353","Cglutamicum_ATCC13032","Cglycinophilum_AJ3170","Chumireducens_DSM45392","Cimitans_DSM44264","Ckroppenstedtii_DSM44385","Ckut…	0.155654	0.155654	2.16708	0.155654	0.155654	2.16708	3330	0
ERS451417_00332	1717.62.peg.334	NA	NA	NA	1	39	Cargentoratense_DSM44202,"Catypicum_R2070","Caurimucosum_ATCC700975","Cbelfantii_FRC0043","Ccallunae_DSM20147","Ccamporealensis_DSM44610","Cdeserti_GIMN1010","Cdiphtheriae_NCTC11397","Cdoosanense_DSM45436","Cefficiens_YS314","Cepidermidicanis_DSM45586","Cfalsenii_DSM44353","Cglutamicum_ATCC13032","Cglycinophilum_AJ3170","Chalotolerans_YIM70093","Chumireducens_DSM45392","Cimitans_DSM44264","Cjeike…	0.186547	0.186547	1.77437	0.186547	0.186547	1.77437	1282	0
ERS451417_01494	1717.62.peg.1502	NA	NA	NA	1	30	Catypicum_R2070,"Caurimucosum_ATCC700975","Cbelfantii_FRC0043","Ccallunae_DSM20147","Ccamporealensis_DSM44610","Cdeserti_GIMN1010","Cdiphtheriae_NCTC11397","Cdoosanense_DSM45436","Cefficiens_YS314","Cglutamicum_ATCC13032","Chalotolerans_YIM70093","Chumireducens_DSM45392","Cimitans_DSM44264","Ckutscheri_DSM20755","Clactis_RW25","Cmarinum_DSM44953","Cmaris_DSM45190","Cmustelae_DSM45274","Cpseudotub…	0.172567	0.144235	1.73385	0.172567	0.144235	1.73385	2050	1	1. 0.69199;2. 178;3. 532;4. 191;5. 182;6. 544;7. 187;8. 559;9. 373;10. D;11. GAT
ERS451417_01442	1717.62.peg.1449	NA	NA	NA	1	28	Cargentoratense_DSM44202,"Caurimucosum_ATCC700975","Cbelfantii_FRC0043","Cdiphtheriae_NCTC11397","Cepidermidicanis_DSM45586","Cglycinophilum_AJ3170","Chalotolerans_YIM70093","Chumireducens_DSM45392","Cimitans_DSM44264","Ckroppenstedtii_DSM44385","Ckutscheri_DSM20755","Clactis_RW25","Cmarinum_DSM44953","Cmaris_DSM45190","Cmustelae_DSM45274","Cpseudotuberculosis_31","Cpseudotuberculosis_ATCC19410",…	0.266637	0.109246	1.94151	0.266637	0.109246	1.94151	2	1	1. 0.85006;2. 38;3. 112;4. 42;5. 42;6. 124;7. 42;8. 124;9. 109;10. V;11. GTT
ERS451417_01500	1717.62.peg.1508	NA	NA	NA	1	12	Cdiphtheriae_NCTC11397,"Cefficiens_YS314","Cglutamicum_ATCC13032","Chalotolerans_YIM70093","Chumireducens_DSM45392","Cpseudotuberculosis_31","Cpseudotuberculosis_ATCC19410","Csilvaticum_KL0182","Ctestudinoris_DSM44614","Culcerans_NCTC12077","Culcerans_NCTC7910","Cvitaeruminis_DSM20294"	0.46115	0.311056	1.8036	0.46115	0.311056	1.8036	2	1	1. 0.84512;2. 259;3. 775;4. 290;5. 274;6. 820;7. 293;8. 877;9. 664;10. G;11. GGT
ERS451417_00911	1717.62.peg.918	NA	NA	NA	1	9	Cbelfantii_FRC0043,"Cdiphtheriae_NCTC11397","Ckutscheri_DSM20755","Cpseudotuberculosis_ATCC19410","Crouxii_FRC0190","Csilvaticum_KL0182","Culcerans_NCTC12077","Culcerans_NCTC7910","Cvitaeruminis_DSM20294"	0.268241	0.268232	2.20461	0.26824	0.268231	2.20461	6146	1	1. 0.44428;2. 245;3. 733;4. 294;5. 278;6. 832;7. 297;8. 889;9. 538;10. G;11. GGT
ERS451417_01803	1717.62.peg.1809	NA	NA	NA	1	38	Cargentoratense_DSM44202,"Catypicum_R2070","Caurimucosum_ATCC700975","Cbelfantii_FRC0043","Ccallunae_DSM20147","Ccamporealensis_DSM44610","Cdeserti_GIMN1010","Cdiphtheriae_NCTC11397","Cdoosanense_DSM45436","Cefficiens_YS314","Cepidermidicanis_DSM45586","Cfalsenii_DSM44353","Cglutamicum_ATCC13032","Cglycinophilum_AJ3170","Chalotolerans_YIM70093","Chumireducens_DSM45392","Cimitans_DSM44264","Cjeike…	0.178795	0.178795	1.80236	0.178795	0.178795	1.80236	258	0
ERS451417_00480	1717.62.peg.483	NA	NA	NA	1	39	Cargentoratense_DSM44202,"Catypicum_R2070","Caurimucosum_ATCC700975","Cbelfantii_FRC0043","Ccallunae_DSM20147","Ccamporealensis_DSM44610","Cdeserti_GIMN1010","Cdiphtheriae_NCTC11397","Cdoosanense_DSM45436","Cefficiens_YS314","Cepidermidicanis_DSM45586","Cfalsenii_DSM44353","Cglutamicum_ATCC13032","Cglycinophilum_AJ3170","Chalotolerans_YIM70093","Chumireducens_DSM45392","Cimitans_DSM44264","Cjeike…	0.639913	0.157506	2.21941	0.286223	0.157516	2.21941	258	0
ERS451417_01463	1717.62.peg.1473	NA	NA	NA	1	30	Cargentoratense_DSM44202,"Catypicum_R2070","Caurimucosum_ATCC700975","Cbelfantii_FRC0043","Ccallunae_DSM20147","Ccamporealensis_DSM44610","Cdeserti_GIMN1010","Cdiphtheriae_NCTC11397","Cdoosanense_DSM45436","Cefficiens_YS314","Cepidermidicanis_DSM45586","Cglutamicum_ATCC13032","Chalotolerans_YIM70093","Chumireducens_DSM45392","Cimitans_DSM44264","Ckutscheri_DSM20755","Cmarinum_DSM44953","Cmaris_DS…	0.05828	0.05828	1.25301	0.05828	0.05828	1.25301	3330	0
ERS451417_01825	1717.62.peg.1830	NA	NA	NA	1	17	Cbelfantii_FRC0043,"Ccallunae_DSM20147","Cdeserti_GIMN1010","Cdiphtheriae_NCTC11397","Cdoosanense_DSM45436","Cepidermidicanis_DSM45586","Cglutamicum_ATCC13032","Ckutscheri_DSM20755","Clactis_RW25","Cpseudotuberculosis_31","Cpseudotuberculosis_ATCC19410","Csilvaticum_KL0182","Csimulans_PES1","Culcerans_NCTC12077","Culcerans_NCTC7910","Cuterequi_DSM45634","Cvitaeruminis_DSM20294"	1.84925	0.155635	1.96586	0.155859	0.155859	1.96353	256	0
ERS451417_00844	1717.62.peg.849	NA	NA	NA	1	13	Cbelfantii_FRC0043,"Cdiphtheriae_NCTC11397","Cefficiens_YS314","Cglutamicum_ATCC13032","Cimitans_DSM44264","Ckutscheri_DSM20755","Cpseudotuberculosis_31","Cpseudotuberculosis_ATCC19410","Crouxii_FRC0190","Csilvaticum_KL0182","Culcerans_NCTC7910","Cureicelerivorans_IMMIBRIV2301","Cvitaeruminis_DSM20294"	0.14264	0.14264	2.1795	0.142649	0.14264	2.1795	258	0
ERS451417_00964	1717.62.peg.971	NA	NA	NA	1	8	Cbelfantii_FRC0043,"Cdiphtheriae_NCTC11397","Cpseudotuberculosis_31","Cpseudotuberculosis_ATCC19410","Crouxii_FRC0190","Csilvaticum_KL0182","Culcerans_NCTC12077","Culcerans_NCTC7910"	0.04377	0.04377	2.54765	0.04377	0.04377	2.54765	258	0
ERS451417_01814	1717.62.peg.1819	NA	NA	NA	1	38	Cargentoratense_DSM44202,"Catypicum_R2070","Caurimucosum_ATCC700975","Cbelfantii_FRC0043","Ccallunae_DSM20147","Ccamporealensis_DSM44610","Cdeserti_GIMN1010","Cdiphtheriae_NCTC11397","Cdoosanense_DSM45436","Cefficiens_YS314","Cepidermidicanis_DSM45586","Cfalsenii_DSM44353","Cglutamicum_ATCC13032","Cglycinophilum_AJ3170","Chalotolerans_YIM70093","Chumireducens_DSM45392","Cimitans_DSM44264","Cjeike…	0.141722	0.141722	1.90399	0.141722	0.141722	1.904	258	0
ERS451417_01573	1717.62.peg.1582	NA	NA	NA	1	38	Cargentoratense_DSM44202,"Catypicum_R2070","Caurimucosum_ATCC700975","Cbelfantii_FRC0043","Ccallunae_DSM20147","Ccamporealensis_DSM44610","Cdeserti_GIMN1010","Cdiphtheriae_NCTC11397","Cdoosanense_DSM45436","Cefficiens_YS314","Cepidermidicanis_DSM45586","Cfalsenii_DSM44353","Cglutamicum_ATCC13032","Cglycinophilum_AJ3170","Chalotolerans_YIM70093","Chumireducens_DSM45392","Cimitans_DSM44264","Cjeike…	0.23656	0.23656	1.58785	0.23656	0.23656	1.58785	3330	0
ERS451417_01501	1717.62.peg.1509	NA	NA	NA	1	38	Cargentoratense_DSM44202,"Catypicum_R2070","Caurimucosum_ATCC700975","Cbelfantii_FRC0043","Ccallunae_DSM20147","Ccamporealensis_DSM44610","Cdeserti_GIMN1010","Cdiphtheriae_NCTC11397","Cdoosanense_DSM45436","Cefficiens_YS314","Cepidermidicanis_DSM45586","Cfalsenii_DSM44353","Cglutamicum_ATCC13032","Cglycinophilum_AJ3170","Chalotolerans_YIM70093","Chumireducens_DSM45392","Cimitans_DSM44264","Cjeike…	0.0768264	0.0768264	1.36872	0.0768264	0.0768264	1.36872	1282	0
ERS451417_00173	1717.62.peg.171	NA	NA	NA	1	23	Catypicum_R2070,"Caurimucosum_ATCC700975","Cbelfantii_FRC0043","Ccallunae_DSM20147","Cdeserti_GIMN1010","Cdiphtheriae_NCTC11397","Cdoosanense_DSM45436","Cefficiens_YS314","Cepidermidicanis_DSM45586","Cfalsenii_DSM44353","Cglutamicum_ATCC13032","Chalotolerans_YIM70093","Ckroppenstedtii_DSM44385","Ckutscheri_DSM20755","Cmarinum_DSM44953","Cmaris_DSM45190","Cpseudotuberculosis_31","Cpseudotuberculos…	0.327739	0.327739	1.54899	0.327739	0.327739	1.54899	3330	0
ERS451417_01929	1717.62.peg.1926	NA	NA	NA	1	26	Catypicum_R2070,"Caurimucosum_ATCC700975","Cbelfantii_FRC0043","Ccallunae_DSM20147","Ccamporealensis_DSM44610","Cdeserti_GIMN1010","Cdiphtheriae_NCTC11397","Cdoosanense_DSM45436","Cefficiens_YS314","Cepidermidicanis_DSM45586","Cglutamicum_ATCC13032","Cglycinophilum_AJ3170","Chalotolerans_YIM70093","Chumireducens_DSM45392","Ckroppenstedtii_DSM44385","Clactis_RW25","Cmarinum_DSM44953","Cmaris_DSM45…	0.512349	0.179406	1.67005	0.29895	0.179416	1.67004	3330	0
ERS451417_00633	1717.62.peg.637	NA	NA	NA	1	39	Cargentoratense_DSM44202,"Catypicum_R2070","Caurimucosum_ATCC700975","Cbelfantii_FRC0043","Ccallunae_DSM20147","Ccamporealensis_DSM44610","Cdeserti_GIMN1010","Cdiphtheriae_NCTC11397","Cdoosanense_DSM45436","Cefficiens_YS314","Cepidermidicanis_DSM45586","Cfalsenii_DSM44353","Cglutamicum_ATCC13032","Cglycinophilum_AJ3170","Chalotolerans_YIM70093","Chumireducens_DSM45392","Cimitans_DSM44264","Cjeike…	0.352186	0.116902	1.60465	0.206582	0.116902	1.60465	3330	0
ERS451417_00497	1717.62.peg.501	NA	NA	NA	1	39	Cargentoratense_DSM44202,"Catypicum_R2070","Caurimucosum_ATCC700975","Cbelfantii_FRC0043","Ccallunae_DSM20147","Ccamporealensis_DSM44610","Cdeserti_GIMN1010","Cdiphtheriae_NCTC11397","Cdoosanense_DSM45436","Cefficiens_YS314","Cepidermidicanis_DSM45586","Cfalsenii_DSM44353","Cglutamicum_ATCC13032","Cglycinophilum_AJ3170","Chalotolerans_YIM70093","Chumireducens_DSM45392","Cimitans_DSM44264","Cjeike…	0.38027	0.197085	1.72675	0.38024	0.197075	1.72675	2	2	1. 0.81858;2. 58;3. 172;4. 81;5. 81;6. 241;7. 118;8. 352;9. 121;10. V;11. GTA	1. 0.81992;2. 201;3. 601;4. 224;5. 224;6. 670;7. 261;8. 781;9. 550;10. A;11. GCC
ERS451417_00310	1717.62.peg.311	NA	NA	NA	1	39	Cargentoratense_DSM44202,"Catypicum_R2070","Caurimucosum_ATCC700975","Cbelfantii_FRC0043","Ccallunae_DSM20147","Ccamporealensis_DSM44610","Cdeserti_GIMN1010","Cdiphtheriae_NCTC11397","Cdoosanense_DSM45436","Cefficiens_YS314","Cepidermidicanis_DSM45586","Cfalsenii_DSM44353","Cglutamicum_ATCC13032","Cglycinophilum_AJ3170","Chalotolerans_YIM70093","Chumireducens_DSM45392","Cimitans_DSM44264","Cjeike…	0.167804	0.167804	1.95441	0.167804	0.167804	1.95441	1282	0
ERS451417_02321	1717.62.peg.2348	NA	NA	NA	1	22	Catypicum_R2070,"Cbelfantii_FRC0043","Ccamporealensis_DSM44610","Cdeserti_GIMN1010","Cdiphtheriae_NCTC11397","Cefficiens_YS314","Cepidermidicanis_DSM45586","Cglutamicum_ATCC13032","Chalotolerans_YIM70093","Chumireducens_DSM45392","Cmarinum_DSM44953","Cmaris_DSM45190","Cmustelae_DSM45274","Cpseudotuberculosis_31","Cpseudotuberculosis_ATCC19410","Csilvaticum_KL0182","Csimulans_PES1","Csingulare_IBS…	0.154601	0.154601	1.68188	0.154601	0.154601	1.68188	3330	0
ERS451417_01731	1717.62.peg.1735	NA	NA	NA	1	26	Catypicum_R2070,"Caurimucosum_ATCC700975","Cbelfantii_FRC0043","Ccamporealensis_DSM44610","Cdiphtheriae_NCTC11397","Cdoosanense_DSM45436","Chalotolerans_YIM70093","Chumireducens_DSM45392","Cimitans_DSM44264","Ckutscheri_DSM20755","Clactis_RW25","Cmarinum_DSM44953","Cmaris_DSM45190","Cmustelae_DSM45274","Cpseudotuberculosis_31","Cpseudotuberculosis_ATCC19410","CriegeliiPUDD83A45","Csilvaticum_KL01…	0.196741	0.196741	1.73185	0.196741	0.196741	1.73185	258	0
ERS451417_00521	1717.62.peg.525	NA	NA	NA	1	7	Cbelfantii_FRC0043,"Cdiphtheriae_NCTC11397","Cpseudotuberculosis_31","Cpseudotuberculosis_ATCC19410","Csilvaticum_KL0182","Culcerans_NCTC12077","Culcerans_NCTC7910"	0.226055	0.226055	4.07486	0.226055	0.226055	4.07485	2	1	1. 0.60846;2. 313;3. 937;4. 364;5. 344;6. 1030;7. 353;8. 1057;9. 823;10. G;11. GGT
ERS451417_01893	1717.62.peg.1892	NA	NA	NA	1	38	Cargentoratense_DSM44202,"Catypicum_R2070","Caurimucosum_ATCC700975","Cbelfantii_FRC0043","Ccallunae_DSM20147","Ccamporealensis_DSM44610","Cdeserti_GIMN1010","Cdiphtheriae_NCTC11397","Cdoosanense_DSM45436","Cefficiens_YS314","Cepidermidicanis_DSM45586","Cfalsenii_DSM44353","Cglutamicum_ATCC13032","Cglycinophilum_AJ3170","Chalotolerans_YIM70093","Chumireducens_DSM45392","Cimitans_DSM44264","Cjeike…	0.100403	0.100403	2.22324	0.100403	0.100403	2.22324	2306	0
ERS451417_01558	1717.62.peg.1567	NA	NA	NA	1	38	Cargentoratense_DSM44202,"Catypicum_R2070","Caurimucosum_ATCC700975","Cbelfantii_FRC0043","Ccallunae_DSM20147","Ccamporealensis_DSM44610","Cdeserti_GIMN1010","Cdiphtheriae_NCTC11397","Cdoosanense_DSM45436","Cefficiens_YS314","Cepidermidicanis_DSM45586","Cfalsenii_DSM44353","Cglutamicum_ATCC13032","Cglycinophilum_AJ3170","Chalotolerans_YIM70093","Chumireducens_DSM45392","Cimitans_DSM44264","Cjeike…	0.218104	0.218104	1.5827	0.218104	0.218104	1.5827	1282	0
ERS451417_01532	1717.62.peg.1541	NA	NA	NA	1	38	Cargentoratense_DSM44202,"Catypicum_R2070","Caurimucosum_ATCC700975","Cbelfantii_FRC0043","Ccallunae_DSM20147","Ccamporealensis_DSM44610","Cdeserti_GIMN1010","Cdiphtheriae_NCTC11397","Cdoosanense_DSM45436","Cefficiens_YS314","Cepidermidicanis_DSM45586","Cfalsenii_DSM44353","Cglutamicum_ATCC13032","Cglycinophilum_AJ3170","Chalotolerans_YIM70093","Chumireducens_DSM45392","Cimitans_DSM44264","Cjeike…	0.195633	0.195633	1.46506	0.195633	0.195633	1.46506	258	0
ERS451417_01253	1717.62.peg.1261	NA	NA	NA	1	31	Catypicum_R2070,"Caurimucosum_ATCC700975","Cbelfantii_FRC0043","Ccamporealensis_DSM44610","Cdiphtheriae_NCTC11397","Cdoosanense_DSM45436","Cepidermidicanis_DSM45586","Cfalsenii_DSM44353","Chalotolerans_YIM70093","Chumireducens_DSM45392","Cimitans_DSM44264","Cjeikeium_K41","Ckroppenstedtii_DSM44385","Ckutscheri_DSM20755","Cmarinum_DSM44953","Cmaris_DSM45190","Cmustelae_DSM45274","Cpseudotuberculos…	0.205432	0.205432	1.65521	0.205432	0.205432	1.65521	258	0
ERS451417_00584	1717.62.peg.588	NA	NA	NA	1	33	Cargentoratense_DSM44202,"Caurimucosum_ATCC700975","Cbelfantii_FRC0043","Ccallunae_DSM20147","Ccamporealensis_DSM44610","Cdeserti_GIMN1010","Cdiphtheriae_NCTC11397","Cefficiens_YS314","Cepidermidicanis_DSM45586","Cfalsenii_DSM44353","Cglutamicum_ATCC13032","Chalotolerans_YIM70093","Chumireducens_DSM45392","Cimitans_DSM44264","Cjeikeium_K41","Ckroppenstedtii_DSM44385","Ckutscheri_DSM20755","Clacti…	0.0907226	0.0907226	2.28508	0.0907226	0.0907226	2.28509	3330	0
ERS451417_02030	1717.62.peg.2035	NA	NA	NA	1	38	Cargentoratense_DSM44202,"Catypicum_R2070","Caurimucosum_ATCC700975","Cbelfantii_FRC0043","Ccallunae_DSM20147","Ccamporealensis_DSM44610","Cdeserti_GIMN1010","Cdiphtheriae_NCTC11397","Cdoosanense_DSM45436","Cefficiens_YS314","Cepidermidicanis_DSM45586","Cfalsenii_DSM44353","Cglutamicum_ATCC13032","Cglycinophilum_AJ3170","Chalotolerans_YIM70093","Chumireducens_DSM45392","Cimitans_DSM44264","Cjeike…	0.0738367	0.0738367	1.60277	0.0738367	0.0738367	1.60276	258	0
ERS451417_02390	1717.62.peg.2422	NA	NA	NA	1	30	Catypicum_R2070,"Caurimucosum_ATCC700975","Cbelfantii_FRC0043","Ccallunae_DSM20147","Ccamporealensis_DSM44610","Cdeserti_GIMN1010","Cdiphtheriae_NCTC11397","Cdoosanense_DSM45436","Cefficiens_YS314","Cglutamicum_ATCC13032","Chalotolerans_YIM70093","Chumireducens_DSM45392","Ckroppenstedtii_DSM44385","Ckutscheri_DSM20755","Clactis_RW25","Cmarinum_DSM44953","Cmaris_DSM45190","Cmustelae_DSM45274","Cps…	0.120993	0.120993	1.65303	0.120993	0.120993	1.65303	258	0
ERS451417_00389	1717.62.peg.389	NA	NA	NA	1	6	Cbelfantii_FRC0043,"Cdiphtheriae_NCTC11397","Cpseudotuberculosis_31","Cpseudotuberculosis_ATCC19410","Crouxii_FRC0190","Culcerans_NCTC12077"	0.117007	0.116997	4.2385	0.117016	0.117006	4.2385	258	0
ERS451417_02234	1717.62.peg.2259	NA	NA	NA	1	6	Cbelfantii_FRC0043,"Cdiphtheriae_NCTC11397","Cpseudotuberculosis_31","Cpseudotuberculosis_ATCC19410","Culcerans_NCTC12077","Culcerans_NCTC7910"	0.84745	0.402881	4.03752	0.40296	0.402881	4.03748	258	0
ERS451417_01376	1717.62.peg.1385	NA	NA	NA	1	38	Cargentoratense_DSM44202,"Catypicum_R2070","Caurimucosum_ATCC700975","Cbelfantii_FRC0043","Ccallunae_DSM20147","Ccamporealensis_DSM44610","Cdeserti_GIMN1010","Cdiphtheriae_NCTC11397","Cdoosanense_DSM45436","Cefficiens_YS314","Cepidermidicanis_DSM45586","Cfalsenii_DSM44353","Cglutamicum_ATCC13032","Cglycinophilum_AJ3170","Chalotolerans_YIM70093","Chumireducens_DSM45392","Cimitans_DSM44264","Cjeike…	0.179437	0.179437	1.57769	0.179437	0.179437	1.57768	258	0
ERS451417_01048	1717.62.peg.1058	NA	NA	NA	1	39	Cargentoratense_DSM44202,"Catypicum_R2070","Caurimucosum_ATCC700975","Cbelfantii_FRC0043","Ccallunae_DSM20147","Ccamporealensis_DSM44610","Cdeserti_GIMN1010","Cdiphtheriae_NCTC11397","Cdoosanense_DSM45436","Cefficiens_YS314","Cepidermidicanis_DSM45586","Cfalsenii_DSM44353","Cglutamicum_ATCC13032","Cglycinophilum_AJ3170","Chalotolerans_YIM70093","Chumireducens_DSM45392","Cimitans_DSM44264","Cjeike…	0.214985	0.214985	1.54556	0.214985	0.214985	1.54556	3330	0
ERS451417_00463	1717.62.peg.467	NA	NA	NA	1	20	Catypicum_R2070,"Caurimucosum_ATCC700975","Cbelfantii_FRC0043","Ccamporealensis_DSM44610","Cdiphtheriae_NCTC11397","Cdoosanense_DSM45436","Cfalsenii_DSM44353","Chalotolerans_YIM70093","Chumireducens_DSM45392","Cimitans_DSM44264","Cmaris_DSM45190","Cmustelae_DSM45274","Cpseudotuberculosis_ATCC19410","Crouxii_FRC0190","Csilvaticum_KL0182","Csimulans_PES1","Csingulare_IBSB52218","Culcerans_NCTC12077…	0.230464	0.209803	1.80092	0.230464	0.209803	1.80092	4098	6	1. 0.57305;2. 9;3. 25;4. 21;5. 19;6. 55;7. 24;8. 70;9. 1;10. N;11. AAC	1. 0.48762;2. 10;3. 28;4. 22;5. 20;6. 58;7. 25;8. 73;9. 4;10. D;11. GAC	1. 0.43162;2. 102;3. 304;4. 118;5. 114;6. 340;7. 119;8. 355;9. 259;10. I;11. ATC	1. 0.41377;2. 110;3. 328;4. 126;5. 122;6. 364;7. 127;8. 379;9. 283;10. M;11. ATG	1. 0.4187;2. 134;3. 400;4. 150;5. 146;6. 436;7. 151;8. 451;9. 355;10. A;11. GCC	1. 0.46541;2. 169;3. 505;4. 187;5. 181;6. 541;7. 186;8. 556;9. 448;10. V;11. GTG
ERS451417_00096	1717.62.peg.94	NA	NA	NA	1	11	Cbelfantii_FRC0043,"Cdiphtheriae_NCTC11397","Chalotolerans_YIM70093","Cmustelae_DSM45274","Cpseudotuberculosis_31","Cpseudotuberculosis_ATCC19410","Crouxii_FRC0190","Csilvaticum_KL0182","Culcerans_NCTC12077","Culcerans_NCTC7910","Cvitaeruminis_DSM20294"	0.374773	0.131963	2.50141	0.374773	0.131963	2.50141	2	1	1. 0.89262;2. 211;3. 631;4. 273;5. 261;6. 781;7. 288;8. 862;9. 511;10. G;11. GGT
ERS451417_00701	1717.62.peg.705	NA	NA	NA	1	14	Cbelfantii_FRC0043,"Cdeserti_GIMN1010","Cdiphtheriae_NCTC11397","Chalotolerans_YIM70093","Chumireducens_DSM45392","Cmarinum_DSM44953","Cmustelae_DSM45274","Cpseudotuberculosis_31","Cpseudotuberculosis_ATCC19410","Crouxii_FRC0190","Csilvaticum_KL0182","Ctestudinoris_DSM44614","Culcerans_NCTC12077","Culcerans_NCTC7910"	0.403805	0.224217	1.75536	0.403805	0.224217	1.75536	3074	2	1. 0.86419;2. 142;3. 424;4. 219;5. 142;6. 424;7. 172;8. 514;9. 238;10. M;11. ATG	1. 0.86842;2. 262;3. 784;4. 396;5. 270;6. 808;7. 325;8. 973;9. 496;10. A;11. GCA
ERS451417_00636	1717.62.peg.640	NA	NA	NA	1	38	Cargentoratense_DSM44202,"Catypicum_R2070","Caurimucosum_ATCC700975","Cbelfantii_FRC0043","Ccallunae_DSM20147","Ccamporealensis_DSM44610","Cdeserti_GIMN1010","Cdiphtheriae_NCTC11397","Cdoosanense_DSM45436","Cefficiens_YS314","Cepidermidicanis_DSM45586","Cglutamicum_ATCC13032","Cglycinophilum_AJ3170","Chalotolerans_YIM70093","Chumireducens_DSM45392","Cimitans_DSM44264","Cjeikeium_K41","Ckroppenste…	0.0456018	0.0456018	1.59033	0.0456018	0.0456018	1.59034	258	0
ERS451417_01461	1717.62.peg.1471	NA	NA	NA	1	37	Cargentoratense_DSM44202,"Catypicum_R2070","Caurimucosum_ATCC700975","Cbelfantii_FRC0043","Ccallunae_DSM20147","Ccamporealensis_DSM44610","Cdeserti_GIMN1010","Cdiphtheriae_NCTC11397","Cdoosanense_DSM45436","Cefficiens_YS314","Cepidermidicanis_DSM45586","Cfalsenii_DSM44353","Cglutamicum_ATCC13032","Cglycinophilum_AJ3170","Chalotolerans_YIM70093","Chumireducens_DSM45392","Cimitans_DSM44264","Ckropp…	0.153172	0.153172	1.87181	0.153172	0.153172	1.87181	258	0
ERS451417_00386	1717.62.peg.386	NA	NA	NA	1	11	Cargentoratense_DSM44202,"Catypicum_R2070","Cbelfantii_FRC0043","Cdiphtheriae_NCTC11397","Cpseudotuberculosis_31","Cpseudotuberculosis_ATCC19410","Crouxii_FRC0190","Csilvaticum_KL0182","Culcerans_NCTC12077","Culcerans_NCTC7910","Cuterequi_DSM45634"	0.201503	0.201503	2.59492	0.201503	0.201503	2.59492	258	0
ERS451417_00516	1717.62.peg.520	NA	NA	NA	1	10	Cbelfantii_FRC0043,"Cdiphtheriae_NCTC11397","Cjeikeium_K41","Clactis_RW25","Cpseudotuberculosis_31","Cpseudotuberculosis_ATCC19410","Crouxii_FRC0190","Csilvaticum_KL0182","Culcerans_NCTC12077","Culcerans_NCTC7910"	0.0432524	0.0432524	2.39988	0.0432524	0.0432524	2.39989	2306	0
ERS451417_02148	1717.62.peg.2170	NA	NA	NA	1	8	Cbelfantii_FRC0043,"Cdiphtheriae_NCTC11397","Clactis_RW25","Cpseudotuberculosis_31","Cpseudotuberculosis_ATCC19410","Csilvaticum_KL0182","Culcerans_NCTC12077","Culcerans_NCTC7910"	0.10901	0.10901	2.4176	0.10901	0.10901	2.4176	3330	0
ERS451417_00558	1717.62.peg.562	NA	NA	NA	1	22	Cargentoratense_DSM44202,"Caurimucosum_ATCC700975","Cbelfantii_FRC0043","Cdeserti_GIMN1010","Cdiphtheriae_NCTC11397","Cglutamicum_ATCC13032","Cglycinophilum_AJ3170","Cimitans_DSM44264","Cjeikeium_K41","Ckutscheri_DSM20755","Cmustelae_DSM45274","Cpseudotuberculosis_31","Cpseudotuberculosis_ATCC19410","CriegeliiPUDD83A45","Crouxii_FRC0190","Csilvaticum_KL0182","Csimulans_PES1","Csingulare_IBSB52218…	0.0796608	0.0796608	1.7328	0.0796704	0.0796608	1.7328	3330	0
ERS451417_00634	1717.62.peg.638	NA	NA	NA	1	39	Cargentoratense_DSM44202,"Catypicum_R2070","Caurimucosum_ATCC700975","Cbelfantii_FRC0043","Ccallunae_DSM20147","Ccamporealensis_DSM44610","Cdeserti_GIMN1010","Cdiphtheriae_NCTC11397","Cdoosanense_DSM45436","Cefficiens_YS314","Cepidermidicanis_DSM45586","Cfalsenii_DSM44353","Cglutamicum_ATCC13032","Cglycinophilum_AJ3170","Chalotolerans_YIM70093","Chumireducens_DSM45392","Cimitans_DSM44264","Cjeike…	0.145398	0.120161	1.67335	0.145398	0.120161	1.67335	2	1	1. 0.75658;2. 545;3. 1633;4. 579;5. 579;6. 1735;7. 599;8. 1795;9. 1525;10. E;11. GAA
ERS451417_01379	1717.62.peg.1388	NA	NA	NA	1	7	Cbelfantii_FRC0043,"Cdiphtheriae_NCTC11397","Cpseudotuberculosis_31","Cpseudotuberculosis_ATCC19410","Csilvaticum_KL0182","Culcerans_NCTC12077","Culcerans_NCTC7910"	0.503557	0.168129	3.15832	0.498281	0.1678	3.1552	2	1	1. 0.88719;2. 274;3. 820;4. 411;5. 291;6. 871;7. 297;8. 889;9. 739;10. G;11. GGT
ERS451417_00254	1717.62.peg.249	NA	NA	NA	1	8	Cargentoratense_DSM44202,"Cbelfantii_FRC0043","Cdiphtheriae_NCTC11397","Cmustelae_DSM45274","Cpseudotuberculosis_ATCC19410","Crouxii_FRC0190","Culcerans_NCTC12077","Culcerans_NCTC7910"	0.114997	0.114997	2.7537	0.114997	0.114997	2.7537	4098	5	1. 0.43692;2. 27;3. 79;4. 41;5. 41;6. 121;7. 45;8. 133;9. 7;10. A;11. GCA	1. 0.43533;2. 104;3. 310;4. 118;5. 118;6. 352;7. 122;8. 364;9. 220;10. L;11. TTA	1. 0.47275;2. 278;3. 832;4. 292;5. 292;6. 874;7. 296;8. 886;9. 721;10. N;11. AAT	1. 0.40702;2. 301;3. 901;4. 315;5. 315;6. 943;7. 319;8. 955;9. 790;10. V;11. GTG	1. 0.40206;2. 446;3. 1336;4. 462;5. 462;6. 1384;7. 473;8. 1417;9. 1144;10. T;11. ACC
ERS451417_01230	1717.62.peg.1238	NA	NA	NA	1	15	Cargentoratense_DSM44202,"Cbelfantii_FRC0043","Cdiphtheriae_NCTC11397","Cepidermidicanis_DSM45586","Ckroppenstedtii_DSM44385","Ckutscheri_DSM20755","Clactis_RW25","Cmustelae_DSM45274","Cpseudotuberculosis_31","Cpseudotuberculosis_ATCC19410","Crouxii_FRC0190","Csilvaticum_KL0182","Culcerans_NCTC12077","Culcerans_NCTC7910","Cvitaeruminis_DSM20294"	0.138761	0.138761	2.18536	0.138761	0.138761	2.18536	258	0
ERS451417_02139	1717.62.peg.2159	NA	NA	NA	1	21	Cbelfantii_FRC0043,"Ccallunae_DSM20147","Cdeserti_GIMN1010","Cdiphtheriae_NCTC11397","Cdoosanense_DSM45436","Cefficiens_YS314","Cglutamicum_ATCC13032","Chumireducens_DSM45392","Ckutscheri_DSM20755","Clactis_RW25","Cmarinum_DSM44953","Cmustelae_DSM45274","Cpseudotuberculosis_31","Cpseudotuberculosis_ATCC19410","Csilvaticum_KL0182","Cterpenotabidum_Y11","Ctestudinoris_DSM44614","Culcerans_NCTC12077…	0.13179	0.13179	2.15774	0.13179	0.13179	2.15775	258	0
ERS451417_00779	1717.62.peg.786	NA	NA	NA	1	34	Cargentoratense_DSM44202,"Catypicum_R2070","Caurimucosum_ATCC700975","Cbelfantii_FRC0043","Ccallunae_DSM20147","Ccamporealensis_DSM44610","Cdeserti_GIMN1010","Cdiphtheriae_NCTC11397","Cdoosanense_DSM45436","Cefficiens_YS314","Cepidermidicanis_DSM45586","Cfalsenii_DSM44353","Cglutamicum_ATCC13032","Chalotolerans_YIM70093","Chumireducens_DSM45392","Cimitans_DSM44264","Cjeikeium_K41","Ckutscheri_DSM…	0.410258	0.410258	1.5524	0.410258	0.410258	1.5524	3330	0
ERS451417_01627	1717.62.peg.1635	NA	NA	NA	1	5	Cbelfantii_FRC0043,"Cdiphtheriae_NCTC11397","Cpseudotuberculosis_ATCC19410","Csilvaticum_KL0182","Culcerans_NCTC7910"	0.99996	0.131984	4.15235	0.99997	0.131974	4.15227	4352	0
ERS451417_02353	1717.62.peg.2381	NA	NA	NA	1	12	Cbelfantii_FRC0043,"Ccamporealensis_DSM44610","Cdiphtheriae_NCTC11397","Chalotolerans_YIM70093","Chumireducens_DSM45392","Cmarinum_DSM44953","Cpseudotuberculosis_31","Cpseudotuberculosis_ATCC19410","Csilvaticum_KL0182","Culcerans_NCTC12077","Culcerans_NCTC7910","Cvitaeruminis_DSM20294"	0.363419	0.237143	2.52319	0.363419	0.237143	2.52319	3074	1	1. 0.82644;2. 148;3. 442;4. 217;5. 164;6. 490;7. 235;8. 703;9. 163;10. W;11. TGG
ERS451417_01645	1717.62.peg.1652	NA	NA	NA	1	20	Cargentoratense_DSM44202,"Catypicum_R2070","Cbelfantii_FRC0043","Ccallunae_DSM20147","Cdeserti_GIMN1010","Cdiphtheriae_NCTC11397","Cefficiens_YS314","Cglutamicum_ATCC13032","Chalotolerans_YIM70093","Chumireducens_DSM45392","Cimitans_DSM44264","Ckutscheri_DSM20755","Cmarinum_DSM44953","Cmaris_DSM45190","Cmustelae_DSM45274","Cpseudotuberculosis_ATCC19410","Csilvaticum_KL0182","Ctestudinoris_DSM4461…	0.242999	0.242999	1.52895	0.242999	0.242999	1.52895	6402	0
ERS451417_01022	1717.62.peg.1035	NA	NA	NA	1	39	Cargentoratense_DSM44202,"Catypicum_R2070","Caurimucosum_ATCC700975","Cbelfantii_FRC0043","Ccallunae_DSM20147","Ccamporealensis_DSM44610","Cdeserti_GIMN1010","Cdiphtheriae_NCTC11397","Cdoosanense_DSM45436","Cefficiens_YS314","Cepidermidicanis_DSM45586","Cfalsenii_DSM44353","Cglutamicum_ATCC13032","Cglycinophilum_AJ3170","Chalotolerans_YIM70093","Chumireducens_DSM45392","Cimitans_DSM44264","Cjeike…	0.0863729	0.0863729	1.82305	0.0863729	0.0863729	1.82305	2306	0
ERS451417_02071	1717.62.peg.2083	NA	NA	NA	1	17	Cargentoratense_DSM44202,"Catypicum_R2070","Cbelfantii_FRC0043","Ccamporealensis_DSM44610","Cdeserti_GIMN1010","Cdiphtheriae_NCTC11397","Cefficiens_YS314","Cepidermidicanis_DSM45586","Cjeikeium_K41","Ckutscheri_DSM20755","Cmustelae_DSM45274","Cpseudotuberculosis_31","Cpseudotuberculosis_ATCC19410","Csilvaticum_KL0182","Culcerans_NCTC12077","Culcerans_NCTC7910","Cvitaeruminis_DSM20294"	0.158556	0.158556	1.66834	0.158556	0.158556	1.66834	2	1	1. 0.64119;2. 120;3. 358;4. 168;5. 130;6. 388;7. 189;8. 565;9. 277;10. T;11. ACG
ERS451417_00304	1717.62.peg.305	NA	NA	NA	1	22	Catypicum_R2070,"Caurimucosum_ATCC700975","Cbelfantii_FRC0043","Ccamporealensis_DSM44610","Cdiphtheriae_NCTC11397","Cepidermidicanis_DSM45586","Chumireducens_DSM45392","Cimitans_DSM44264","Cmarinum_DSM44953","Cmustelae_DSM45274","Cpseudotuberculosis_31","Cpseudotuberculosis_ATCC19410","CriegeliiPUDD83A45","Crouxii_FRC0190","Csilvaticum_KL0182","Csimulans_PES1","Csingulare_IBSB52218","Ctestudinori…	0.163973	0.115801	1.98692	0.163973	0.115801	1.98692	2	1	1. 0.76729;2. 563;3. 1687;4. 565;5. 565;6. 1693;7. 575;8. 1723;9. 1417;10. V;11. GTG
ERS451417_00010	1717.62.peg.11	NA	NA	NA	1	27	Catypicum_R2070,"Caurimucosum_ATCC700975","Cbelfantii_FRC0043","Ccallunae_DSM20147","Ccamporealensis_DSM44610","Cdeserti_GIMN1010","Cdiphtheriae_NCTC11397","Cdoosanense_DSM45436","Cefficiens_YS314","Cepidermidicanis_DSM45586","Cglutamicum_ATCC13032","Chalotolerans_YIM70093","Chumireducens_DSM45392","Ckutscheri_DSM20755","Cmarinum_DSM44953","Cmaris_DSM45190","Cmustelae_DSM45274","Cpseudotuberculos…	0.160567	0.160567	1.96705	0.160567	0.160567	1.96705	258	0
ERS451417_00991	1717.62.peg.1002	NA	NA	NA	1	28	Cargentoratense_DSM44202,"Cbelfantii_FRC0043","Cdeserti_GIMN1010","Cdiphtheriae_NCTC11397","Cefficiens_YS314","Cepidermidicanis_DSM45586","Cfalsenii_DSM44353","Cglutamicum_ATCC13032","Cglycinophilum_AJ3170","Chalotolerans_YIM70093","Chumireducens_DSM45392","Cjeikeium_K41","Ckroppenstedtii_DSM44385","Ckutscheri_DSM20755","Cmarinum_DSM44953","Cmaris_DSM45190","Cmustelae_DSM45274","Cpseudotuberculos…	0.188286	0.188286	1.70293	0.188286	0.188286	1.70293	3074	1	1. 0.71191;2. 214;3. 640;4. 237;5. 237;6. 709;7. 286;8. 856;9. 535;10. M;11. ATG
ERS451417_00311	1717.62.peg.312	NA	NA	NA	1	39	Cargentoratense_DSM44202,"Catypicum_R2070","Caurimucosum_ATCC700975","Cbelfantii_FRC0043","Ccallunae_DSM20147","Ccamporealensis_DSM44610","Cdeserti_GIMN1010","Cdiphtheriae_NCTC11397","Cdoosanense_DSM45436","Cefficiens_YS314","Cepidermidicanis_DSM45586","Cfalsenii_DSM44353","Cglutamicum_ATCC13032","Cglycinophilum_AJ3170","Chalotolerans_YIM70093","Chumireducens_DSM45392","Cimitans_DSM44264","Cjeike…	0.212654	0.212654	1.93981	0.212654	0.212654	1.93983	258	0
ERS451417_01216	1717.62.peg.1224	NA	NA	NA	1	39	Cargentoratense_DSM44202,"Catypicum_R2070","Caurimucosum_ATCC700975","Cbelfantii_FRC0043","Ccallunae_DSM20147","Ccamporealensis_DSM44610","Cdeserti_GIMN1010","Cdiphtheriae_NCTC11397","Cdoosanense_DSM45436","Cefficiens_YS314","Cepidermidicanis_DSM45586","Cfalsenii_DSM44353","Cglutamicum_ATCC13032","Cglycinophilum_AJ3170","Chalotolerans_YIM70093","Chumireducens_DSM45392","Cimitans_DSM44264","Cjeike…	0.214116	0.214116	1.79625	0.214116	0.214116	1.79624	1282	0
ERS451417_01012	1717.62.peg.1023	NA	NA	NA	1	30	Cargentoratense_DSM44202,"Caurimucosum_ATCC700975","Cbelfantii_FRC0043","Ccallunae_DSM20147","Ccamporealensis_DSM44610","Cdeserti_GIMN1010","Cdiphtheriae_NCTC11397","Cdoosanense_DSM45436","Cefficiens_YS314","Cglutamicum_ATCC13032","Chalotolerans_YIM70093","Chumireducens_DSM45392","Cimitans_DSM44264","Ckutscheri_DSM20755","Cmarinum_DSM44953","Cmaris_DSM45190","Cmustelae_DSM45274","Cpseudotuberculo…	0.163569	0.143857	1.54695	0.163569	0.143857	1.54695	2050	1	1. 0.77361;2. 459;3. 1375;4. 550;5. 499;6. 1495;7. 548;8. 1642;9. 1033;10. A;11. GCC
ERS451417_01419	1717.62.peg.1425	NA	NA	NA	1	17	Cbelfantii_FRC0043,"Ccallunae_DSM20147","Cdeserti_GIMN1010","Cdiphtheriae_NCTC11397","Cdoosanense_DSM45436","Cefficiens_YS314","Cglutamicum_ATCC13032","Chalotolerans_YIM70093","Chumireducens_DSM45392","Cmarinum_DSM44953","Cmaris_DSM45190","Cpseudotuberculosis_31","Cpseudotuberculosis_ATCC19410","Csilvaticum_KL0182","Ctestudinoris_DSM44614","Culcerans_NCTC12077","Culcerans_NCTC7910"	19.5818	0.30139	1.72533	1	0.30139	1.72533	256	0
ERS451417_01517	1717.62.peg.1525	NA	NA	NA	1	38	Cargentoratense_DSM44202,"Catypicum_R2070","Caurimucosum_ATCC700975","Cbelfantii_FRC0043","Ccallunae_DSM20147","Ccamporealensis_DSM44610","Cdeserti_GIMN1010","Cdiphtheriae_NCTC11397","Cdoosanense_DSM45436","Cefficiens_YS314","Cepidermidicanis_DSM45586","Cfalsenii_DSM44353","Cglutamicum_ATCC13032","Cglycinophilum_AJ3170","Chalotolerans_YIM70093","Chumireducens_DSM45392","Cimitans_DSM44264","Cjeike…	0.224165	0.224165	1.70277	0.224165	0.224165	1.70277	258	0
ERS451417_00298	1717.62.peg.299	NA	NA	NA	1	38	Cargentoratense_DSM44202,"Catypicum_R2070","Caurimucosum_ATCC700975","Cbelfantii_FRC0043","Ccallunae_DSM20147","Ccamporealensis_DSM44610","Cdeserti_GIMN1010","Cdiphtheriae_NCTC11397","Cdoosanense_DSM45436","Cefficiens_YS314","Cepidermidicanis_DSM45586","Cfalsenii_DSM44353","Cglutamicum_ATCC13032","Cglycinophilum_AJ3170","Chalotolerans_YIM70093","Chumireducens_DSM45392","Cimitans_DSM44264","Cjeike…	0.438439	0.200524	1.73513	0.438439	0.200524	1.73513	1026	2	1. 0.86385;2. 237;3. 709;4. 292;5. 291;6. 871;7. 512;8. 1534;9. 535;10. E;11. GAG	1. 0.8679;2. 348;3. 1042;4. 403;5. 402;6. 1204;7. 624;8. 1870;9. 841;10. D;11. GAT
ERS451417_00635	1717.62.peg.639	NA	NA	NA	1	7	Cbelfantii_FRC0043,"Cdiphtheriae_NCTC11397","Cpseudotuberculosis_31","Cpseudotuberculosis_ATCC19410","Crouxii_FRC0190","Culcerans_NCTC12077","Culcerans_NCTC7910"	0.487641	0.187812	2.83538	0.301336	0.187813	2.83538	258	0
ERS451417_01665	1717.62.peg.1672	NA	NA	NA	1	38	Cargentoratense_DSM44202,"Catypicum_R2070","Caurimucosum_ATCC700975","Cbelfantii_FRC0043","Ccallunae_DSM20147","Ccamporealensis_DSM44610","Cdeserti_GIMN1010","Cdiphtheriae_NCTC11397","Cdoosanense_DSM45436","Cefficiens_YS314","Cepidermidicanis_DSM45586","Cfalsenii_DSM44353","Cglutamicum_ATCC13032","Cglycinophilum_AJ3170","Chalotolerans_YIM70093","Chumireducens_DSM45392","Cimitans_DSM44264","Cjeike…	0.106786	0.106786	1.8165	0.106786	0.106786	1.8165	258	0
ERS451417_02123	1717.62.peg.2138	NA	NA	NA	1	38	Cargentoratense_DSM44202,"Catypicum_R2070","Caurimucosum_ATCC700975","Cbelfantii_FRC0043","Ccallunae_DSM20147","Ccamporealensis_DSM44610","Cdeserti_GIMN1010","Cdiphtheriae_NCTC11397","Cdoosanense_DSM45436","Cefficiens_YS314","Cepidermidicanis_DSM45586","Cfalsenii_DSM44353","Cglutamicum_ATCC13032","Cglycinophilum_AJ3170","Chalotolerans_YIM70093","Chumireducens_DSM45392","Cimitans_DSM44264","Cjeike…	0.131968	0.0604004	2.12394	0.131969	0.0604007	2.12394	2	1	1. 0.69044;2. 62;3. 184;4. 84;5. 84;6. 250;7. 123;8. 367;9. 163;10. V;11. GTG
ERS451417_00285	1717.62.peg.286	NA	NA	NA	1	29	Cargentoratense_DSM44202,"Caurimucosum_ATCC700975","Cbelfantii_FRC0043","Ccallunae_DSM20147","Ccamporealensis_DSM44610","Cdeserti_GIMN1010","Cdiphtheriae_NCTC11397","Cdoosanense_DSM45436","Cefficiens_YS314","Cglutamicum_ATCC13032","Chumireducens_DSM45392","Cimitans_DSM44264","Ckutscheri_DSM20755","Cmarinum_DSM44953","Cmaris_DSM45190","Cmustelae_DSM45274","Cpseudotuberculosis_31","Cpseudotuberculo…	1	0.24619	1.78201	1	0.24619	1.78202	3072	2	1. 0.94429;2. 189;3. 565;4. 219;5. 207;6. 619;7. 230;8. 688;9. 382;10. A;11. GCG	1. 0.94349;2. 333;3. 997;4. 408;5. 366;6. 1096;7. 395;8. 1183;9. 733;10. G;11. GGG
ERS451417_02313	1717.62.peg.2340	NA	NA	NA	1	38	Cargentoratense_DSM44202,"Catypicum_R2070","Caurimucosum_ATCC700975","Cbelfantii_FRC0043","Ccallunae_DSM20147","Ccamporealensis_DSM44610","Cdeserti_GIMN1010","Cdiphtheriae_NCTC11397","Cdoosanense_DSM45436","Cefficiens_YS314","Cepidermidicanis_DSM45586","Cfalsenii_DSM44353","Cglutamicum_ATCC13032","Cglycinophilum_AJ3170","Chalotolerans_YIM70093","Chumireducens_DSM45392","Cimitans_DSM44264","Cjeike…	0.758114	0.263034	1.64845	0.359857	0.263034	1.64845	258	0
ERS451417_01231	1717.62.peg.1239	NA	NA	NA	1	13	Cargentoratense_DSM44202,"Cbelfantii_FRC0043","Cdiphtheriae_NCTC11397","Cepidermidicanis_DSM45586","Ckutscheri_DSM20755","Cmustelae_DSM45274","Cpseudotuberculosis_31","Cpseudotuberculosis_ATCC19410","Crouxii_FRC0190","Csilvaticum_KL0182","Culcerans_NCTC12077","Culcerans_NCTC7910","Cvitaeruminis_DSM20294"	0.183996	0.183996	2.33671	0.183996	0.183996	2.33671	3330	0
ERS451417_01055	1717.62.peg.1066	NA	NA	NA	1	39	Cargentoratense_DSM44202,"Catypicum_R2070","Caurimucosum_ATCC700975","Cbelfantii_FRC0043","Ccallunae_DSM20147","Ccamporealensis_DSM44610","Cdeserti_GIMN1010","Cdiphtheriae_NCTC11397","Cdoosanense_DSM45436","Cefficiens_YS314","Cepidermidicanis_DSM45586","Cfalsenii_DSM44353","Cglutamicum_ATCC13032","Cglycinophilum_AJ3170","Chalotolerans_YIM70093","Chumireducens_DSM45392","Cimitans_DSM44264","Cjeike…	0.426349	0.142506	1.8109	0.2563	0.142506	1.8109	258	0
ERS451417_00262	1717.62.peg.256	NA	NA	NA	1	39	Cargentoratense_DSM44202,"Catypicum_R2070","Caurimucosum_ATCC700975","Cbelfantii_FRC0043","Ccallunae_DSM20147","Ccamporealensis_DSM44610","Cdeserti_GIMN1010","Cdiphtheriae_NCTC11397","Cdoosanense_DSM45436","Cefficiens_YS314","Cepidermidicanis_DSM45586","Cfalsenii_DSM44353","Cglutamicum_ATCC13032","Cglycinophilum_AJ3170","Chalotolerans_YIM70093","Chumireducens_DSM45392","Cimitans_DSM44264","Cjeike…	0.167893	0.167893	2.26494	0.167902	0.167902	2.26494	2306	0
ERS451417_01278	1717.62.peg.1286	NA	NA	NA	1	23	Catypicum_R2070,"Ccallunae_DSM20147","Cdeserti_GIMN1010","Cdiphtheriae_NCTC11397","Cdoosanense_DSM45436","Cefficiens_YS314","Cglutamicum_ATCC13032","Chalotolerans_YIM70093","Chumireducens_DSM45392","Ckutscheri_DSM20755","Cmarinum_DSM44953","Cmaris_DSM45190","Cmustelae_DSM45274","Cpseudotuberculosis_31","Cpseudotuberculosis_ATCC19410","CriegeliiPUDD83A45","Crouxii_FRC0190","Csilvaticum_KL0182","Ct…	0.660516	0.260918	1.7622	0.365571	0.260918	1.7622	258	0
ERS451417_00517	1717.62.peg.521	NA	NA	NA	1	9	Cbelfantii_FRC0043,"Cdiphtheriae_NCTC11397","Cjeikeium_K41","Clactis_RW25","Cpseudotuberculosis_31","Cpseudotuberculosis_ATCC19410","Csilvaticum_KL0182","Culcerans_NCTC12077","Culcerans_NCTC7910"	0.282327	0.132363	2.59913	0.282327	0.132363	2.59913	2	1	1. 0.85422;2. 307;3. 919;4. 320;5. 320;6. 958;7. 327;8. 979;9. 868;10. I;11. ATT
ERS451417_02001	1717.62.peg.2005	NA	NA	NA	1	7	Cbelfantii_FRC0043,"Cdiphtheriae_NCTC11397","Cpseudotuberculosis_31","Cpseudotuberculosis_ATCC19410","Csilvaticum_KL0182","Culcerans_NCTC12077","Culcerans_NCTC7910"	0.231554	0.231554	3.02133	0.231554	0.231554	3.02133	258	0
ERS451417_00713	1717.62.peg.718	NA	NA	NA	1	39	Cargentoratense_DSM44202,"Catypicum_R2070","Caurimucosum_ATCC700975","Cbelfantii_FRC0043","Ccallunae_DSM20147","Ccamporealensis_DSM44610","Cdeserti_GIMN1010","Cdiphtheriae_NCTC11397","Cdoosanense_DSM45436","Cefficiens_YS314","Cepidermidicanis_DSM45586","Cfalsenii_DSM44353","Cglutamicum_ATCC13032","Cglycinophilum_AJ3170","Chalotolerans_YIM70093","Chumireducens_DSM45392","Cimitans_DSM44264","Cjeike…	0.11197	0.11197	1.88591	0.11197	0.11197	1.88591	258	0
ERS451417_01054	1717.62.peg.1064	NA	NA	NA	1	39	Cargentoratense_DSM44202,"Catypicum_R2070","Caurimucosum_ATCC700975","Cbelfantii_FRC0043","Ccallunae_DSM20147","Ccamporealensis_DSM44610","Cdeserti_GIMN1010","Cdiphtheriae_NCTC11397","Cdoosanense_DSM45436","Cefficiens_YS314","Cepidermidicanis_DSM45586","Cfalsenii_DSM44353","Cglutamicum_ATCC13032","Cglycinophilum_AJ3170","Chalotolerans_YIM70093","Chumireducens_DSM45392","Cimitans_DSM44264","Cjeike…	0.145253	0.145148	1.41519	0.145167	0.145148	1.4152	3330	0
ERS451417_00632	1717.62.peg.636	NA	NA	NA	1	9	Cbelfantii_FRC0043,"Cdiphtheriae_NCTC11397","Cpseudotuberculosis_31","Cpseudotuberculosis_ATCC19410","Crouxii_FRC0190","Csilvaticum_KL0182","Culcerans_NCTC12077","Culcerans_NCTC7910","Cvitaeruminis_DSM20294"	2.94086	0.112459	2.78089	0.112965	0.11246	2.7809	256	0
ERS451417_02210	1717.62.peg.2234	NA	NA	NA	1	38	Cargentoratense_DSM44202,"Catypicum_R2070","Caurimucosum_ATCC700975","Cbelfantii_FRC0043","Ccallunae_DSM20147","Ccamporealensis_DSM44610","Cdeserti_GIMN1010","Cdiphtheriae_NCTC11397","Cdoosanense_DSM45436","Cefficiens_YS314","Cepidermidicanis_DSM45586","Cfalsenii_DSM44353","Cglutamicum_ATCC13032","Cglycinophilum_AJ3170","Chalotolerans_YIM70093","Chumireducens_DSM45392","Cimitans_DSM44264","Cjeike…	0.206511	0.185235	1.73167	0.206511	0.185235	1.73167	2	1	1. 0.67559;2. 402;3. 1204;4. 439;5. 439;6. 1315;7. 478;8. 1432;9. 1147;10. E;11. GAA
ERS451417_00118	1717.62.peg.116	NA	NA	NA	1	11	Cbelfantii_FRC0043,"Cdiphtheriae_NCTC11397","Cdoosanense_DSM45436","Chalotolerans_YIM70093","Cmarinum_DSM44953","Cpseudotuberculosis_31","Cpseudotuberculosis_ATCC19410","Csilvaticum_KL0182","Ctestudinoris_DSM44614","Culcerans_NCTC7910","Cvitaeruminis_DSM20294"	0.357215	0.357215	1.70418	0.357215	0.357215	1.70418	3330	0
ERS451417_00172	1717.62.peg.170	NA	NA	NA	1	17	Caurimucosum_ATCC700975,"Cbelfantii_FRC0043","Ccallunae_DSM20147","Cdeserti_GIMN1010","Cdiphtheriae_NCTC11397","Cefficiens_YS314","Cfalsenii_DSM44353","Cglutamicum_ATCC13032","Chalotolerans_YIM70093","Ckutscheri_DSM20755","Cmaris_DSM45190","Cpseudotuberculosis_31","Cpseudotuberculosis_ATCC19410","Csilvaticum_KL0182","Csimulans_PES1","Culcerans_NCTC12077","Culcerans_NCTC7910"	0.124034	0.124034	2.37411	0.124034	0.124034	2.37411	258	0
ERS451417_00880	1717.62.peg.886	NA	NA	NA	1	8	Cbelfantii_FRC0043,"Cdiphtheriae_NCTC11397","Cpseudotuberculosis_31","Cpseudotuberculosis_ATCC19410","Crouxii_FRC0190","Csilvaticum_KL0182","Culcerans_NCTC12077","Culcerans_NCTC7910"	0.112112	0.112112	2.30803	0.112112	0.112112	2.30803	258	0
ERS451417_01790	1717.62.peg.1795	NA	NA	NA	1	37	Cargentoratense_DSM44202,"Catypicum_R2070","Caurimucosum_ATCC700975","Cbelfantii_FRC0043","Ccallunae_DSM20147","Ccamporealensis_DSM44610","Cdeserti_GIMN1010","Cdiphtheriae_NCTC11397","Cdoosanense_DSM45436","Cefficiens_YS314","Cepidermidicanis_DSM45586","Cfalsenii_DSM44353","Cglutamicum_ATCC13032","Cglycinophilum_AJ3170","Chalotolerans_YIM70093","Chumireducens_DSM45392","Cimitans_DSM44264","Cjeike…	0.167679	0.167679	1.6195	0.167679	0.167679	1.6195	3330	0
ERS451417_02360	1717.62.peg.2389	NA	NA	NA	1	12	Caurimucosum_ATCC700975,"Cbelfantii_FRC0043","Cdiphtheriae_NCTC11397","Ckroppenstedtii_DSM44385","Cpseudotuberculosis_31","Cpseudotuberculosis_ATCC19410","Csilvaticum_KL0182","Csimulans_PES1","Csingulare_IBSB52218","Culcerans_NCTC12077","Culcerans_NCTC7910","Cuterequi_DSM45634"	0.801283	0.116502	2.41971	0.801273	0.116502	2.41971	2	2	1. 0.93067;2. 11;3. 31;4. 32;5. 23;6. 67;7. 24;8. 70;9. 28;10. V;11. GTG	1. 0.92952;2. 170;3. 508;4. 214;5. 186;6. 556;7. 187;8. 559;9. 472;10. A;11. GCG
ERS451417_01226	1717.62.peg.1234	NA	NA	NA	1	39	Cargentoratense_DSM44202,"Catypicum_R2070","Caurimucosum_ATCC700975","Cbelfantii_FRC0043","Ccallunae_DSM20147","Ccamporealensis_DSM44610","Cdeserti_GIMN1010","Cdiphtheriae_NCTC11397","Cdoosanense_DSM45436","Cefficiens_YS314","Cepidermidicanis_DSM45586","Cfalsenii_DSM44353","Cglutamicum_ATCC13032","Cglycinophilum_AJ3170","Chalotolerans_YIM70093","Chumireducens_DSM45392","Cimitans_DSM44264","Cjeike…	0.152826	0.152826	2.06803	0.152826	0.152826	2.06803	2306	0
ERS451417_02316	1717.62.peg.2343	NA	NA	NA	1	17	Cbelfantii_FRC0043,"Ccallunae_DSM20147","Cdeserti_GIMN1010","Cdiphtheriae_NCTC11397","Cefficiens_YS314","Cfalsenii_DSM44353","Cglutamicum_ATCC13032","Cjeikeium_K41","Ckroppenstedtii_DSM44385","Ckutscheri_DSM20755","Cmustelae_DSM45274","Cpseudotuberculosis_31","Cpseudotuberculosis_ATCC19410","Csilvaticum_KL0182","Culcerans_NCTC12077","Culcerans_NCTC7910","Cvitaeruminis_DSM20294"	0.173551	0.173551	2.23746	0.173551	0.173551	2.23746	2306	0
ERS451417_00015	1717.62.peg.15	NA	NA	NA	1	7	Cdiphtheriae_NCTC11397,"Cpseudotuberculosis_31","Cpseudotuberculosis_ATCC19410","Crouxii_FRC0190","Csilvaticum_KL0182","Culcerans_NCTC12077","Culcerans_NCTC7910"	0.869539	0.246437	4.64482	0.246828	0.246828	4.63999	3328	0
ERS451417_00766	1717.62.peg.771	NA	NA	NA	1	9	Cbelfantii_FRC0043,"Cdiphtheriae_NCTC11397","Cpseudotuberculosis_31","Cpseudotuberculosis_ATCC19410","Crouxii_FRC0190","Csilvaticum_KL0182","Culcerans_NCTC12077","Culcerans_NCTC7910","Cvitaeruminis_DSM20294"	0.347273	0.342106	3.02834	0.347273	0.342106	3.02834	2	1	1. 0.55731;2. 99;3. 295;4. 191;5. 109;6. 325;7. 112;8. 334;9. 268;10. D;11. GAT
ERS451417_01684	1717.62.peg.1691	NA	NA	NA	1	9	Cbelfantii_FRC0043,"Cdiphtheriae_NCTC11397","Ckutscheri_DSM20755","Cpseudotuberculosis_31","Cpseudotuberculosis_ATCC19410","Csilvaticum_KL0182","Culcerans_NCTC12077","Culcerans_NCTC7910","Cvitaeruminis_DSM20294"	0.21604	0.21604	2.8195	0.21604	0.21604	2.8195	258	0
ERS451417_00068	1717.62.peg.64	NA	NA	NA	1	16	Cbelfantii_FRC0043,"Ccallunae_DSM20147","Cdiphtheriae_NCTC11397","Cdoosanense_DSM45436","Chalotolerans_YIM70093","Chumireducens_DSM45392","Cmarinum_DSM44953","Cmaris_DSM45190","Cpseudotuberculosis_31","Cpseudotuberculosis_ATCC19410","Crouxii_FRC0190","Csilvaticum_KL0182","Ctestudinoris_DSM44614","Culcerans_NCTC12077","Culcerans_NCTC7910","Cvitaeruminis_DSM20294"	0.149034	0.149034	1.63664	0.149034	0.149034	1.63664	258	0
ERS451417_00788	1717.62.peg.795	NA	NA	NA	1	20	Cbelfantii_FRC0043,"Ccallunae_DSM20147","Cdeserti_GIMN1010","Cdiphtheriae_NCTC11397","Cefficiens_YS314","Cepidermidicanis_DSM45586","Cfalsenii_DSM44353","Cglutamicum_ATCC13032","Cglycinophilum_AJ3170","Cjeikeium_K41","Ckroppenstedtii_DSM44385","Clactis_RW25","Cmustelae_DSM45274","Cpseudotuberculosis_31","Cpseudotuberculosis_ATCC19410","Crouxii_FRC0190","Csilvaticum_KL0182","Cterpenotabidum_Y11","…	0.127163	0.127163	2.44797	0.127172	0.127172	2.44797	3330	0
ERS451417_00782	1717.62.peg.789	NA	NA	NA	1	39	Cargentoratense_DSM44202,"Catypicum_R2070","Caurimucosum_ATCC700975","Cbelfantii_FRC0043","Ccallunae_DSM20147","Ccamporealensis_DSM44610","Cdeserti_GIMN1010","Cdiphtheriae_NCTC11397","Cdoosanense_DSM45436","Cefficiens_YS314","Cepidermidicanis_DSM45586","Cfalsenii_DSM44353","Cglutamicum_ATCC13032","Cglycinophilum_AJ3170","Chalotolerans_YIM70093","Chumireducens_DSM45392","Cimitans_DSM44264","Cjeike…	0.124443	0.124443	1.80057	0.124443	0.124443	1.80057	1282	0
ERS451417_00505	1717.62.peg.509	NA	NA	NA	1	8	Cbelfantii_FRC0043,"Cdiphtheriae_NCTC11397","Cpseudotuberculosis_31","Cpseudotuberculosis_ATCC19410","Crouxii_FRC0190","Csilvaticum_KL0182","Culcerans_NCTC12077","Culcerans_NCTC7910"	11.4616	0.0704887	3.63625	0.0709624	0.0709624	3.73243	256	0
ERS451417_02149	1717.62.peg.2171	NA	NA	NA	1	7	Cbelfantii_FRC0043,"Cdiphtheriae_NCTC11397","Clactis_RW25","Cpseudotuberculosis_ATCC19410","Csilvaticum_KL0182","Culcerans_NCTC12077","Culcerans_NCTC7910"	0.0764101	0.0764101	2.66259	0.0764101	0.0764101	2.66258	6146	1	1. 0.40461;2. 182;3. 544;4. 191;5. 189;6. 565;7. 204;8. 610;9. 328;10. K;11. AAA
ERS451417_01795	1717.62.peg.1800	NA	NA	NA	1	38	Cargentoratense_DSM44202,"Catypicum_R2070","Caurimucosum_ATCC700975","Cbelfantii_FRC0043","Ccallunae_DSM20147","Ccamporealensis_DSM44610","Cdeserti_GIMN1010","Cdiphtheriae_NCTC11397","Cdoosanense_DSM45436","Cefficiens_YS314","Cepidermidicanis_DSM45586","Cfalsenii_DSM44353","Cglutamicum_ATCC13032","Cglycinophilum_AJ3170","Chalotolerans_YIM70093","Chumireducens_DSM45392","Cimitans_DSM44264","Cjeike…	1.03271	0.134204	1.98456	0.134338	0.134338	1.9841	2304	0
ERS451417_00213	1717.62.peg.210	NA	NA	NA	1	6	Cbelfantii_FRC0043,"Cdiphtheriae_NCTC11397","Cmustelae_DSM45274","Cpseudotuberculosis_31","Cpseudotuberculosis_ATCC19410","Crouxii_FRC0190"	0.233214	0.0876718	4.07947	0.233214	0.0876718	4.07946	2	2	1. 0.77322;2. 222;3. 664;4. 222;5. 222;6. 664;7. 224;8. 670;9. 643;10. A;11. GCG	1. 0.74398;2. 231;3. 691;4. 231;5. 231;6. 691;7. 233;8. 697;9. 670;10. Q;11. CAG
ERS451417_00671	1717.62.peg.678	NA	NA	NA	1	16	Cargentoratense_DSM44202,"Cbelfantii_FRC0043","Cdiphtheriae_NCTC11397","Cefficiens_YS314","Cepidermidicanis_DSM45586","Ckroppenstedtii_DSM44385","Ckutscheri_DSM20755","Clactis_RW25","Cmustelae_DSM45274","Cpseudotuberculosis_31","Cpseudotuberculosis_ATCC19410","Crouxii_FRC0190","Csilvaticum_KL0182","Culcerans_NCTC12077","Culcerans_NCTC7910","Cvitaeruminis_DSM20294"	0.0908722	0.0908722	2.74175	0.0908722	0.0908722	2.74176	258	0
ERS451417_00739	1717.62.peg.742	NA	NA	NA	1	39	Cargentoratense_DSM44202,"Catypicum_R2070","Caurimucosum_ATCC700975","Cbelfantii_FRC0043","Ccallunae_DSM20147","Ccamporealensis_DSM44610","Cdeserti_GIMN1010","Cdiphtheriae_NCTC11397","Cdoosanense_DSM45436","Cefficiens_YS314","Cepidermidicanis_DSM45586","Cfalsenii_DSM44353","Cglutamicum_ATCC13032","Cglycinophilum_AJ3170","Chalotolerans_YIM70093","Chumireducens_DSM45392","Cimitans_DSM44264","Cjeike…	6.85937	0.17744	1.79375	0.177449	0.177449	1.79294	256	0
ERS451417_00393	1717.62.peg.393	NA	NA	NA	1	39	Cargentoratense_DSM44202,"Catypicum_R2070","Caurimucosum_ATCC700975","Cbelfantii_FRC0043","Ccallunae_DSM20147","Ccamporealensis_DSM44610","Cdeserti_GIMN1010","Cdiphtheriae_NCTC11397","Cdoosanense_DSM45436","Cefficiens_YS314","Cepidermidicanis_DSM45586","Cfalsenii_DSM44353","Cglutamicum_ATCC13032","Cglycinophilum_AJ3170","Chalotolerans_YIM70093","Chumireducens_DSM45392","Cimitans_DSM44264","Cjeike…	0.487216	0.145812	1.81737	0.295279	0.145812	1.81737	258	0
ERS451417_00954	1717.62.peg.961	NA	NA	NA	1	39	Cargentoratense_DSM44202,"Catypicum_R2070","Caurimucosum_ATCC700975","Cbelfantii_FRC0043","Ccallunae_DSM20147","Ccamporealensis_DSM44610","Cdeserti_GIMN1010","Cdiphtheriae_NCTC11397","Cdoosanense_DSM45436","Cefficiens_YS314","Cepidermidicanis_DSM45586","Cfalsenii_DSM44353","Cglutamicum_ATCC13032","Cglycinophilum_AJ3170","Chalotolerans_YIM70093","Chumireducens_DSM45392","Cimitans_DSM44264","Cjeike…	0.370231	0.0836912	1.75975	0.370251	0.0836912	1.75976	1026	1	1. 0.85679;2. 349;3. 1045;4. 388;5. 388;6. 1162;7. 403;8. 1207;9. 997;10. I;11. ATT
ERS451417_01310	1717.62.peg.1318	NA	NA	NA	1	38	Cargentoratense_DSM44202,"Catypicum_R2070","Caurimucosum_ATCC700975","Cbelfantii_FRC0043","Ccallunae_DSM20147","Ccamporealensis_DSM44610","Cdeserti_GIMN1010","Cdiphtheriae_NCTC11397","Cdoosanense_DSM45436","Cefficiens_YS314","Cepidermidicanis_DSM45586","Cfalsenii_DSM44353","Cglutamicum_ATCC13032","Cglycinophilum_AJ3170","Chalotolerans_YIM70093","Chumireducens_DSM45392","Cimitans_DSM44264","Cjeike…	8.57303	0.159366	1.52094	0.159422	0.159422	1.52248	256	0
ERS451417_00598	1717.62.peg.602	NA	NA	NA	1	12	Cdiphtheriae_NCTC11397,"Chalotolerans_YIM70093","Chumireducens_DSM45392","Cmarinum_DSM44953","Cpseudotuberculosis_31","Cpseudotuberculosis_ATCC19410","Crouxii_FRC0190","Csilvaticum_KL0182","Csimulans_PES1","Ctestudinoris_DSM44614","Culcerans_NCTC12077","Culcerans_NCTC7910"	0.206389	0.206389	2.77373	0.206389	0.206389	2.77372	2306	0
ERS451417_00360	1717.62.peg.359	NA	NA	NA	1	39	Cargentoratense_DSM44202,"Catypicum_R2070","Caurimucosum_ATCC700975","Cbelfantii_FRC0043","Ccallunae_DSM20147","Ccamporealensis_DSM44610","Cdeserti_GIMN1010","Cdiphtheriae_NCTC11397","Cdoosanense_DSM45436","Cefficiens_YS314","Cepidermidicanis_DSM45586","Cfalsenii_DSM44353","Cglutamicum_ATCC13032","Cglycinophilum_AJ3170","Chalotolerans_YIM70093","Chumireducens_DSM45392","Cimitans_DSM44264","Cjeike…	0.257651	0.257651	1.65203	0.257651	0.257651	1.65203	258	0
ERS451417_01928	1717.62.peg.1925	NA	NA	NA	1	38	Cargentoratense_DSM44202,"Catypicum_R2070","Caurimucosum_ATCC700975","Cbelfantii_FRC0043","Ccallunae_DSM20147","Ccamporealensis_DSM44610","Cdeserti_GIMN1010","Cdiphtheriae_NCTC11397","Cdoosanense_DSM45436","Cefficiens_YS314","Cepidermidicanis_DSM45586","Cfalsenii_DSM44353","Cglutamicum_ATCC13032","Cglycinophilum_AJ3170","Chalotolerans_YIM70093","Chumireducens_DSM45392","Cimitans_DSM44264","Cjeike…	0.775504	0.106125	1.67541	0.775542	0.106125	1.67541	1026	1	1. 0.93439;2. 313;3. 937;4. 384;5. 384;6. 1150;7. 492;8. 1474;9. 853;10. E;11. GAA
ERS451417_01575	1717.62.peg.1584	NA	NA	NA	1	38	Cargentoratense_DSM44202,"Catypicum_R2070","Caurimucosum_ATCC700975","Cbelfantii_FRC0043","Ccallunae_DSM20147","Ccamporealensis_DSM44610","Cdeserti_GIMN1010","Cdiphtheriae_NCTC11397","Cdoosanense_DSM45436","Cefficiens_YS314","Cepidermidicanis_DSM45586","Cfalsenii_DSM44353","Cglutamicum_ATCC13032","Cglycinophilum_AJ3170","Chalotolerans_YIM70093","Chumireducens_DSM45392","Cimitans_DSM44264","Cjeike…	0.79747	0.130383	1.83871	0.130401	0.130401	1.83645	258	0
ERS451417_01971	1717.62.peg.1971	NA	NA	NA	1	15	Caurimucosum_ATCC700975,"Cbelfantii_FRC0043","Ccamporealensis_DSM44610","Cdiphtheriae_NCTC11397","Ckutscheri_DSM20755","Cmustelae_DSM45274","Cpseudotuberculosis_31","Cpseudotuberculosis_ATCC19410","Csilvaticum_KL0182","Csimulans_PES1","Csingulare_IBSB52218","Ctestudinoris_DSM44614","Culcerans_NCTC12077","Culcerans_NCTC7910","Cvitaeruminis_DSM20294"	0.208628	0.208628	1.84893	0.208628	0.208628	1.84893	258	0
ERS451417_00263	1717.62.peg.257	NA	NA	NA	1	32	Cargentoratense_DSM44202,"Catypicum_R2070","Cbelfantii_FRC0043","Ccallunae_DSM20147","Ccamporealensis_DSM44610","Cdeserti_GIMN1010","Cdiphtheriae_NCTC11397","Cdoosanense_DSM45436","Cefficiens_YS314","Cepidermidicanis_DSM45586","Cfalsenii_DSM44353","Cglutamicum_ATCC13032","Cglycinophilum_AJ3170","Chalotolerans_YIM70093","Chumireducens_DSM45392","Cimitans_DSM44264","Cjeikeium_K41","Cmarinum_DSM4495…	0.301685	0.233379	1.88793	0.303177	0.23337	1.88772	1026	1	1. 0.81333;2. 36;3. 106;4. 124;5. 116;6. 346;7. 233;8. 697;9. 22;10. P;11. CCA
ERS451417_00807	1717.62.peg.814	NA	NA	NA	1	23	Catypicum_R2070,"Caurimucosum_ATCC700975","Cbelfantii_FRC0043","Ccallunae_DSM20147","Ccamporealensis_DSM44610","Cdeserti_GIMN1010","Cdiphtheriae_NCTC11397","Cdoosanense_DSM45436","Cefficiens_YS314","Cepidermidicanis_DSM45586","Cglutamicum_ATCC13032","Chalotolerans_YIM70093","Chumireducens_DSM45392","Cmarinum_DSM44953","Cmaris_DSM45190","Cpseudotuberculosis_ATCC19410","Crouxii_FRC0190","Csilvaticu…	0.393633	0.370596	1.9262	0.393633	0.370596	1.9262	6402	0
ERS451417_02289	1717.62.peg.2318	NA	NA	NA	1	37	Cargentoratense_DSM44202,"Catypicum_R2070","Caurimucosum_ATCC700975","Cbelfantii_FRC0043","Ccallunae_DSM20147","Ccamporealensis_DSM44610","Cdeserti_GIMN1010","Cdiphtheriae_NCTC11397","Cdoosanense_DSM45436","Cefficiens_YS314","Cepidermidicanis_DSM45586","Cfalsenii_DSM44353","Cglutamicum_ATCC13032","Cglycinophilum_AJ3170","Chalotolerans_YIM70093","Chumireducens_DSM45392","Cimitans_DSM44264","Cjeike…	0.0532333	0.0532333	1.79155	0.0532333	0.0532333	1.79156	3330	0
ERS451417_02384	1717.62.peg.2416	NA	NA	NA	1	37	Cargentoratense_DSM44202,"Catypicum_R2070","Caurimucosum_ATCC700975","Cbelfantii_FRC0043","Ccallunae_DSM20147","Ccamporealensis_DSM44610","Cdeserti_GIMN1010","Cdiphtheriae_NCTC11397","Cdoosanense_DSM45436","Cefficiens_YS314","Cepidermidicanis_DSM45586","Cfalsenii_DSM44353","Cglutamicum_ATCC13032","Cglycinophilum_AJ3170","Chalotolerans_YIM70093","Chumireducens_DSM45392","Cimitans_DSM44264","Cjeike…	0.215028	0.0653527	1.79404	0.215028	0.0653527	1.79404	1026	1	1. 0.76604;2. 43;3. 127;4. 74;5. 74;6. 220;7. 135;8. 403;9. 61;10. R;11. AGA
ERS451417_01441	1717.62.peg.1448	NA	NA	NA	1	28	Cargentoratense_DSM44202,"Caurimucosum_ATCC700975","Cbelfantii_FRC0043","Cdiphtheriae_NCTC11397","Cepidermidicanis_DSM45586","Cglycinophilum_AJ3170","Chalotolerans_YIM70093","Chumireducens_DSM45392","Cimitans_DSM44264","Ckroppenstedtii_DSM44385","Ckutscheri_DSM20755","Clactis_RW25","Cmarinum_DSM44953","Cmaris_DSM45190","Cmustelae_DSM45274","Cpseudotuberculosis_31","Cpseudotuberculosis_ATCC19410",…	0.213237	0.213237	1.58226	0.213237	0.213237	1.58226	258	0
ERS451417_00189	1717.62.peg.185	NA	NA	NA	1	22	Catypicum_R2070,"Caurimucosum_ATCC700975","Cbelfantii_FRC0043","Ccamporealensis_DSM44610","Cdiphtheriae_NCTC11397","Cepidermidicanis_DSM45586","Cfalsenii_DSM44353","Ckroppenstedtii_DSM44385","Ckutscheri_DSM20755","Clactis_RW25","Cmustelae_DSM45274","Cpseudotuberculosis_31","Cpseudotuberculosis_ATCC19410","CriegeliiPUDD83A45","Crouxii_FRC0190","Csilvaticum_KL0182","Csimulans_PES1","Ctestudinoris_D…	0.390592	0.390592	2.2253	0.390592	0.390592	2.2253	2306	0
ERS451417_01805	1717.62.peg.1811	NA	NA	NA	1	38	Cargentoratense_DSM44202,"Catypicum_R2070","Caurimucosum_ATCC700975","Cbelfantii_FRC0043","Ccallunae_DSM20147","Ccamporealensis_DSM44610","Cdeserti_GIMN1010","Cdiphtheriae_NCTC11397","Cdoosanense_DSM45436","Cefficiens_YS314","Cepidermidicanis_DSM45586","Cfalsenii_DSM44353","Cglutamicum_ATCC13032","Cglycinophilum_AJ3170","Chalotolerans_YIM70093","Chumireducens_DSM45392","Cimitans_DSM44264","Cjeike…	0.0831572	0.0831572	1.59638	0.0831572	0.0831572	1.59638	1282	0
ERS451417_00699	1717.62.peg.703	NA	NA	NA	1	25	Catypicum_R2070,"Caurimucosum_ATCC700975","Cbelfantii_FRC0043","Ccallunae_DSM20147","Ccamporealensis_DSM44610","Cdeserti_GIMN1010","Cdiphtheriae_NCTC11397","Cefficiens_YS314","Cepidermidicanis_DSM45586","Cglutamicum_ATCC13032","Cglycinophilum_AJ3170","Chalotolerans_YIM70093","Chumireducens_DSM45392","Cmarinum_DSM44953","Cmustelae_DSM45274","Cpseudotuberculosis_31","Cpseudotuberculosis_ATCC19410",…	0.127102	0.127084	1.67277	0.127093	0.127084	1.67277	258	0
ERS451417_01046	1717.62.peg.1056	NA	NA	NA	1	39	Cargentoratense_DSM44202,"Catypicum_R2070","Caurimucosum_ATCC700975","Cbelfantii_FRC0043","Ccallunae_DSM20147","Ccamporealensis_DSM44610","Cdeserti_GIMN1010","Cdiphtheriae_NCTC11397","Cdoosanense_DSM45436","Cefficiens_YS314","Cepidermidicanis_DSM45586","Cfalsenii_DSM44353","Cglutamicum_ATCC13032","Cglycinophilum_AJ3170","Chalotolerans_YIM70093","Chumireducens_DSM45392","Cimitans_DSM44264","Cjeike…	0.229826	0.209124	1.70041	0.229826	0.209124	1.70041	3074	1	1. 0.73931;2. 331;3. 991;4. 380;5. 380;6. 1138;7. 459;8. 1375;9. 700;10. M;11. ATG
ERS451417_01947	1717.62.peg.1947	NA	NA	NA	1	19	Cbelfantii_FRC0043,"Ccallunae_DSM20147","Cdeserti_GIMN1010","Cdiphtheriae_NCTC11397","Cefficiens_YS314","Cepidermidicanis_DSM45586","Cglutamicum_ATCC13032","Chalotolerans_YIM70093","Ckroppenstedtii_DSM44385","Clactis_RW25","Cmarinum_DSM44953","Cmaris_DSM45190","Cmustelae_DSM45274","Cpseudotuberculosis_31","Cpseudotuberculosis_ATCC19410","Ctestudinoris_DSM44614","Culcerans_NCTC12077","Culcerans_NC…	0.747801	0.195673	1.48582	0.747791	0.195672	1.48582	2	2	1. 0.74488;2. 73;3. 217;4. 86;5. 78;6. 232;7. 81;8. 241;9. 190;10. K;11. AAG	1. 0.79394;2. 127;3. 379;4. 146;5. 138;6. 412;7. 141;8. 421;9. 343;10. P;11. CCC
ERS451417_00567	1717.62.peg.570	NA	NA	NA	1	39	Cargentoratense_DSM44202,"Catypicum_R2070","Caurimucosum_ATCC700975","Cbelfantii_FRC0043","Ccallunae_DSM20147","Ccamporealensis_DSM44610","Cdeserti_GIMN1010","Cdiphtheriae_NCTC11397","Cdoosanense_DSM45436","Cefficiens_YS314","Cepidermidicanis_DSM45586","Cfalsenii_DSM44353","Cglutamicum_ATCC13032","Cglycinophilum_AJ3170","Chalotolerans_YIM70093","Chumireducens_DSM45392","Cimitans_DSM44264","Cjeike…	0.0844004	0.0844004	1.5447	0.0844004	0.0844004	1.5447	258	0
ERS451417_00302	1717.62.peg.303	NA	NA	NA	1	22	Catypicum_R2070,"Caurimucosum_ATCC700975","Cbelfantii_FRC0043","Ccamporealensis_DSM44610","Cdiphtheriae_NCTC11397","Cepidermidicanis_DSM45586","Chumireducens_DSM45392","Cimitans_DSM44264","Cmarinum_DSM44953","Cmustelae_DSM45274","Cpseudotuberculosis_31","Cpseudotuberculosis_ATCC19410","CriegeliiPUDD83A45","Crouxii_FRC0190","Csilvaticum_KL0182","Csimulans_PES1","Csingulare_IBSB52218","Ctestudinori…	0.105787	0.105787	2.07503	0.105787	0.105787	2.07503	258	0
ERS451417_00750	1717.62.peg.755	NA	NA	NA	1	22	Cargentoratense_DSM44202,"Cbelfantii_FRC0043","Ccallunae_DSM20147","Cdeserti_GIMN1010","Cdiphtheriae_NCTC11397","Cefficiens_YS314","Cepidermidicanis_DSM45586","Cglutamicum_ATCC13032","Chalotolerans_YIM70093","Chumireducens_DSM45392","Ckroppenstedtii_DSM44385","Ckutscheri_DSM20755","Clactis_RW25","Cmarinum_DSM44953","Cmustelae_DSM45274","Cpseudotuberculosis_31","Cpseudotuberculosis_ATCC19410","Cro…	0.194273	0.194273	1.70844	0.194273	0.194273	1.70844	258	0
ERS451417_00403	1717.62.peg.403	NA	NA	NA	1	38	Cargentoratense_DSM44202,"Catypicum_R2070","Caurimucosum_ATCC700975","Cbelfantii_FRC0043","Ccallunae_DSM20147","Ccamporealensis_DSM44610","Cdeserti_GIMN1010","Cdiphtheriae_NCTC11397","Cdoosanense_DSM45436","Cefficiens_YS314","Cepidermidicanis_DSM45586","Cfalsenii_DSM44353","Cglutamicum_ATCC13032","Cglycinophilum_AJ3170","Chalotolerans_YIM70093","Chumireducens_DSM45392","Cimitans_DSM44264","Cjeike…	0.0943873	0.0943873	1.92006	0.0943873	0.0943873	1.92006	4354	0
ERS451417_00230	1717.62.peg.226	NA	NA	NA	1	38	Cargentoratense_DSM44202,"Catypicum_R2070","Caurimucosum_ATCC700975","Cbelfantii_FRC0043","Ccallunae_DSM20147","Ccamporealensis_DSM44610","Cdeserti_GIMN1010","Cdiphtheriae_NCTC11397","Cdoosanense_DSM45436","Cefficiens_YS314","Cepidermidicanis_DSM45586","Cfalsenii_DSM44353","Cglutamicum_ATCC13032","Cglycinophilum_AJ3170","Chalotolerans_YIM70093","Chumireducens_DSM45392","Cimitans_DSM44264","Cjeike…	0.184775	0.184775	1.97092	0.184775	0.184775	1.97091	7426	0
ERS451417_01420	1717.62.peg.1426	NA	NA	NA	1	36	Cargentoratense_DSM44202,"Catypicum_R2070","Caurimucosum_ATCC700975","Cbelfantii_FRC0043","Ccallunae_DSM20147","Ccamporealensis_DSM44610","Cdeserti_GIMN1010","Cdiphtheriae_NCTC11397","Cdoosanense_DSM45436","Cefficiens_YS314","Cepidermidicanis_DSM45586","Cfalsenii_DSM44353","Cglutamicum_ATCC13032","Cglycinophilum_AJ3170","Chalotolerans_YIM70093","Chumireducens_DSM45392","Cimitans_DSM44264","Cjeike…	0.314474	0.157793	1.68614	0.314474	0.157792	1.68614	3074	2	1. 0.79662;2. 347;3. 1039;4. 373;5. 373;6. 1117;7. 391;8. 1171;9. 748;10. P;11. CCG	1. 0.78595;2. 579;3. 1735;4. 617;5. 617;6. 1849;7. 709;8. 2125;9. 1261;10. A;11. GCG
ERS451417_01544	1717.62.peg.1553	NA	NA	NA	1	16	Cbelfantii_FRC0043,"Ccallunae_DSM20147","Cdeserti_GIMN1010","Cdiphtheriae_NCTC11397","Cefficiens_YS314","Cglutamicum_ATCC13032","Chalotolerans_YIM70093","Chumireducens_DSM45392","Cmarinum_DSM44953","Cpseudotuberculosis_31","Cpseudotuberculosis_ATCC19410","Csilvaticum_KL0182","Ctestudinoris_DSM44614","Culcerans_NCTC12077","Culcerans_NCTC7910","Cvitaeruminis_DSM20294"	0.338699	0.338699	1.70214	0.338699	0.338699	1.70214	258	0
ERS451417_00639	1717.62.peg.643	NA	NA	NA	1	19	Cargentoratense_DSM44202,"Cbelfantii_FRC0043","Cdiphtheriae_NCTC11397","Cepidermidicanis_DSM45586","Cfalsenii_DSM44353","Cglycinophilum_AJ3170","Chalotolerans_YIM70093","Chumireducens_DSM45392","Clactis_RW25","Cmarinum_DSM44953","Cmustelae_DSM45274","Cpseudotuberculosis_31","Cpseudotuberculosis_ATCC19410","Crouxii_FRC0190","Csilvaticum_KL0182","Ctestudinoris_DSM44614","Culcerans_NCTC12077","Culce…	0.137672	0.137672	1.69543	0.137672	0.137672	1.69543	258	0
ERS451417_02229	1717.62.peg.2254	NA	NA	NA	1	28	Catypicum_R2070,"Caurimucosum_ATCC700975","Cbelfantii_FRC0043","Ccallunae_DSM20147","Ccamporealensis_DSM44610","Cdeserti_GIMN1010","Cdiphtheriae_NCTC11397","Cdoosanense_DSM45436","Cepidermidicanis_DSM45586","Cfalsenii_DSM44353","Cglutamicum_ATCC13032","Chalotolerans_YIM70093","Chumireducens_DSM45392","Cimitans_DSM44264","Ckutscheri_DSM20755","Cmarinum_DSM44953","Cmaris_DSM45190","Cmustelae_DSM452…	0.243522	0.243522	1.62309	0.243522	0.243522	1.62309	2306	0
ERS451417_02285	1717.62.peg.2314	NA	NA	NA	1	7	Cbelfantii_FRC0043,"Cdiphtheriae_NCTC11397","Cpseudotuberculosis_31","Cpseudotuberculosis_ATCC19410","Csilvaticum_KL0182","Culcerans_NCTC12077","Culcerans_NCTC7910"	0.140414	0.140414	3.06453	0.140414	0.140414	3.06452	2	1	1. 0.46504;2. 155;3. 463;4. 231;5. 185;6. 553;7. 185;8. 553;9. 412;10. A;11. GCC
ERS451417_00518	1717.62.peg.522	NA	NA	NA	1	9	Cbelfantii_FRC0043,"Cdiphtheriae_NCTC11397","Cjeikeium_K41","Clactis_RW25","Cpseudotuberculosis_31","Cpseudotuberculosis_ATCC19410","Csilvaticum_KL0182","Culcerans_NCTC12077","Culcerans_NCTC7910"	0.0857075	0.0857075	3.44601	0.0857075	0.0857075	3.44598	258	0
ERS451417_00818	1717.62.peg.824	NA	NA	NA	1	39	Cargentoratense_DSM44202,"Catypicum_R2070","Caurimucosum_ATCC700975","Cbelfantii_FRC0043","Ccallunae_DSM20147","Ccamporealensis_DSM44610","Cdeserti_GIMN1010","Cdiphtheriae_NCTC11397","Cdoosanense_DSM45436","Cefficiens_YS314","Cepidermidicanis_DSM45586","Cfalsenii_DSM44353","Cglutamicum_ATCC13032","Cglycinophilum_AJ3170","Chalotolerans_YIM70093","Chumireducens_DSM45392","Cimitans_DSM44264","Cjeike…	0.20858	0.20858	1.88024	0.20858	0.20858	1.88025	258	0
ERS451417_01015	1717.62.peg.1026	NA	NA	NA	1	39	Cargentoratense_DSM44202,"Catypicum_R2070","Caurimucosum_ATCC700975","Cbelfantii_FRC0043","Ccallunae_DSM20147","Ccamporealensis_DSM44610","Cdeserti_GIMN1010","Cdiphtheriae_NCTC11397","Cdoosanense_DSM45436","Cefficiens_YS314","Cepidermidicanis_DSM45586","Cfalsenii_DSM44353","Cglutamicum_ATCC13032","Cglycinophilum_AJ3170","Chalotolerans_YIM70093","Chumireducens_DSM45392","Cimitans_DSM44264","Cjeike…	0.115991	0.115991	1.70758	0.115991	0.115991	1.70758	258	0
ERS451417_02171	1717.62.peg.2197	NA	NA	NA	1	8	Cbelfantii_FRC0043,"Cdiphtheriae_NCTC11397","Ckutscheri_DSM20755","Cpseudotuberculosis_31","Cpseudotuberculosis_ATCC19410","Csilvaticum_KL0182","Culcerans_NCTC12077","Culcerans_NCTC7910"	0.0904623	0.0904623	1.66305	0.0904623	0.0904623	1.66305	258	0
ERS451417_02070	1717.62.peg.2082	NA	NA	NA	1	7	Cbelfantii_FRC0043,"Cdiphtheriae_NCTC11397","Cpseudotuberculosis_31","Cpseudotuberculosis_ATCC19410","Csilvaticum_KL0182","Culcerans_NCTC12077","Culcerans_NCTC7910"	8.46192	0.115752	2.40918	0.956376	0.115742	2.40918	2304	0
ERS451417_00893	1717.62.peg.899	NA	NA	NA	1	23	Catypicum_R2070,"Caurimucosum_ATCC700975","Cbelfantii_FRC0043","Cdiphtheriae_NCTC11397","Cfalsenii_DSM44353","Cglycinophilum_AJ3170","Cimitans_DSM44264","Cjeikeium_K41","Ckroppenstedtii_DSM44385","Ckutscheri_DSM20755","Clactis_RW25","Cpseudotuberculosis_31","Cpseudotuberculosis_ATCC19410","CriegeliiPUDD83A45","Crouxii_FRC0190","Csilvaticum_KL0182","Csimulans_PES1","Csingulare_IBSB52218","Cterpeno…	0.184114	0.184114	1.91418	0.184114	0.184114	1.91418	258	0
ERS451417_00288	1717.62.peg.289	NA	NA	NA	1	25	Catypicum_R2070,"Cbelfantii_FRC0043","Ccallunae_DSM20147","Cdeserti_GIMN1010","Cdiphtheriae_NCTC11397","Cefficiens_YS314","Cepidermidicanis_DSM45586","Cglutamicum_ATCC13032","Chalotolerans_YIM70093","Chumireducens_DSM45392","Cimitans_DSM44264","Ckutscheri_DSM20755","Clactis_RW25","Cmarinum_DSM44953","Cmaris_DSM45190","Cmustelae_DSM45274","Cpseudotuberculosis_31","Cpseudotuberculosis_ATCC19410","C…	0.23493	0.23493	1.59449	0.257015	0.234951	1.59461	3074	1	1. 0.75139;2. 413;3. 1237;4. 468;5. 468;6. 1402;7. 570;8. 1708;9. 817;10. T;11. ACG
ERS451417_00803	1717.62.peg.810	NA	NA	NA	1	39	Cargentoratense_DSM44202,"Catypicum_R2070","Caurimucosum_ATCC700975","Cbelfantii_FRC0043","Ccallunae_DSM20147","Ccamporealensis_DSM44610","Cdeserti_GIMN1010","Cdiphtheriae_NCTC11397","Cdoosanense_DSM45436","Cefficiens_YS314","Cepidermidicanis_DSM45586","Cfalsenii_DSM44353","Cglutamicum_ATCC13032","Cglycinophilum_AJ3170","Chalotolerans_YIM70093","Chumireducens_DSM45392","Cimitans_DSM44264","Cjeike…	0.0776435	0.0776435	2.08109	0.0776435	0.0776435	2.08109	258	0
ERS451417_02259	1717.62.peg.2288	NA	NA	NA	1	14	Caurimucosum_ATCC700975,"Cbelfantii_FRC0043","Ccamporealensis_DSM44610","Cdiphtheriae_NCTC11397","Ckroppenstedtii_DSM44385","Clactis_RW25","Cmustelae_DSM45274","Cpseudotuberculosis_31","Cpseudotuberculosis_ATCC19410","Csilvaticum_KL0182","Csimulans_PES1","Csingulare_IBSB52218","Culcerans_NCTC12077","Culcerans_NCTC7910"	0.151046	0.151046	2.51315	0.151046	0.151046	2.51315	258	0
ERS451417_01700	1717.62.peg.1706	NA	NA	NA	1	38	Cargentoratense_DSM44202,"Catypicum_R2070","Caurimucosum_ATCC700975","Cbelfantii_FRC0043","Ccallunae_DSM20147","Ccamporealensis_DSM44610","Cdeserti_GIMN1010","Cdiphtheriae_NCTC11397","Cdoosanense_DSM45436","Cefficiens_YS314","Cepidermidicanis_DSM45586","Cfalsenii_DSM44353","Cglutamicum_ATCC13032","Cglycinophilum_AJ3170","Chalotolerans_YIM70093","Chumireducens_DSM45392","Cimitans_DSM44264","Cjeike…	0.124964	0.124964	1.71433	0.124964	0.124964	1.71433	258	0
ERS451417_00783	1717.62.peg.790	NA	NA	NA	1	36	Cargentoratense_DSM44202,"Catypicum_R2070","Caurimucosum_ATCC700975","Cbelfantii_FRC0043","Ccallunae_DSM20147","Ccamporealensis_DSM44610","Cdeserti_GIMN1010","Cdiphtheriae_NCTC11397","Cdoosanense_DSM45436","Cefficiens_YS314","Cepidermidicanis_DSM45586","Cfalsenii_DSM44353","Cglutamicum_ATCC13032","Cglycinophilum_AJ3170","Chalotolerans_YIM70093","Chumireducens_DSM45392","Cimitans_DSM44264","Cjeike…	0.188543	0.188543	1.09089	0.188543	0.188543	1.09089	258	0
ERS451417_00963	1717.62.peg.970	NA	NA	NA	1	39	Cargentoratense_DSM44202,"Catypicum_R2070","Caurimucosum_ATCC700975","Cbelfantii_FRC0043","Ccallunae_DSM20147","Ccamporealensis_DSM44610","Cdeserti_GIMN1010","Cdiphtheriae_NCTC11397","Cdoosanense_DSM45436","Cefficiens_YS314","Cepidermidicanis_DSM45586","Cfalsenii_DSM44353","Cglutamicum_ATCC13032","Cglycinophilum_AJ3170","Chalotolerans_YIM70093","Chumireducens_DSM45392","Cimitans_DSM44264","Cjeike…	0.524669	0.225287	2.1397	0.343575	0.225287	2.1397	2306	0
ERS451417_00953	1717.62.peg.960	NA	NA	NA	1	39	Cargentoratense_DSM44202,"Catypicum_R2070","Caurimucosum_ATCC700975","Cbelfantii_FRC0043","Ccallunae_DSM20147","Ccamporealensis_DSM44610","Cdeserti_GIMN1010","Cdiphtheriae_NCTC11397","Cdoosanense_DSM45436","Cefficiens_YS314","Cepidermidicanis_DSM45586","Cfalsenii_DSM44353","Cglutamicum_ATCC13032","Cglycinophilum_AJ3170","Chalotolerans_YIM70093","Chumireducens_DSM45392","Cimitans_DSM44264","Cjeike…	0.174732	0.174732	1.76809	0.174732	0.174732	1.76809	258	0
ERS451417_02177	1717.62.peg.2203	NA	NA	NA	1	6	Cdiphtheriae_NCTC11397,"Cpseudotuberculosis_31","Cpseudotuberculosis_ATCC19410","Csilvaticum_KL0182","Culcerans_NCTC12077","Culcerans_NCTC7910"	0.16481	0.16481	2.86899	0.16481	0.16481	2.86899	258	0
ERS451417_01964	1717.62.peg.1964	NA	NA	NA	1	30	Cargentoratense_DSM44202,"Catypicum_R2070","Caurimucosum_ATCC700975","Cbelfantii_FRC0043","Ccallunae_DSM20147","Cdeserti_GIMN1010","Cdiphtheriae_NCTC11397","Cdoosanense_DSM45436","Cepidermidicanis_DSM45586","Cfalsenii_DSM44353","Cglutamicum_ATCC13032","Cglycinophilum_AJ3170","Chalotolerans_YIM70093","Chumireducens_DSM45392","Cimitans_DSM44264","Cjeikeium_K41","Ckroppenstedtii_DSM44385","Clactis_R…	0.163353	0.163353	1.67946	0.163353	0.163353	1.67945	258	0
ERS451417_00293	1717.62.peg.294	NA	NA	NA	1	38	Cargentoratense_DSM44202,"Catypicum_R2070","Caurimucosum_ATCC700975","Cbelfantii_FRC0043","Ccallunae_DSM20147","Ccamporealensis_DSM44610","Cdeserti_GIMN1010","Cdiphtheriae_NCTC11397","Cdoosanense_DSM45436","Cefficiens_YS314","Cepidermidicanis_DSM45586","Cfalsenii_DSM44353","Cglutamicum_ATCC13032","Cglycinophilum_AJ3170","Chalotolerans_YIM70093","Chumireducens_DSM45392","Cimitans_DSM44264","Cjeike…	0.163054	0.163054	1.97969	0.163054	0.163054	1.97972	3330	0
ERS451417_00890	1717.62.peg.896	NA	NA	NA	1	34	Cargentoratense_DSM44202,"Catypicum_R2070","Caurimucosum_ATCC700975","Cbelfantii_FRC0043","Ccallunae_DSM20147","Ccamporealensis_DSM44610","Cdeserti_GIMN1010","Cdiphtheriae_NCTC11397","Cdoosanense_DSM45436","Cefficiens_YS314","Cepidermidicanis_DSM45586","Cglutamicum_ATCC13032","Chalotolerans_YIM70093","Chumireducens_DSM45392","Cimitans_DSM44264","Ckroppenstedtii_DSM44385","Ckutscheri_DSM20755","Cl…	0.0558295	0.0558295	1.59	0.0558295	0.0558295	1.59	2306	0
ERS451417_00236	1717.62.peg.232	NA	NA	NA	1	33	Catypicum_R2070,"Caurimucosum_ATCC700975","Cbelfantii_FRC0043","Ccamporealensis_DSM44610","Cdeserti_GIMN1010","Cdiphtheriae_NCTC11397","Cdoosanense_DSM45436","Cefficiens_YS314","Cepidermidicanis_DSM45586","Cglutamicum_ATCC13032","Cglycinophilum_AJ3170","Chalotolerans_YIM70093","Chumireducens_DSM45392","Cimitans_DSM44264","Ckroppenstedtii_DSM44385","Ckutscheri_DSM20755","Cmarinum_DSM44953","Cmaris…	0.999981	0.233274	1.83856	0.549766	0.23322	1.83845	2048	1	1. 0.936;2. 115;3. 343;4. 130;5. 125;6. 373;7. 132;8. 394;9. 253;10. V;11. GTA
ERS451417_00461	1717.62.peg.465	NA	NA	NA	1	39	Cargentoratense_DSM44202,"Catypicum_R2070","Caurimucosum_ATCC700975","Cbelfantii_FRC0043","Ccallunae_DSM20147","Ccamporealensis_DSM44610","Cdeserti_GIMN1010","Cdiphtheriae_NCTC11397","Cdoosanense_DSM45436","Cefficiens_YS314","Cepidermidicanis_DSM45586","Cfalsenii_DSM44353","Cglutamicum_ATCC13032","Cglycinophilum_AJ3170","Chalotolerans_YIM70093","Chumireducens_DSM45392","Cimitans_DSM44264","Cjeike…	0.926897	0.432091	1.73657	0.540419	0.432082	1.73657	256	0
ERS451417_01970	1717.62.peg.1970	NA	NA	NA	1	7	Cbelfantii_FRC0043,"Cdiphtheriae_NCTC11397","Cpseudotuberculosis_31","Cpseudotuberculosis_ATCC19410","Csilvaticum_KL0182","Culcerans_NCTC12077","Culcerans_NCTC7910"	0.354271	0.354271	3.83851	0.354271	0.354271	3.83852	258	0
ERS451417_00629	1717.62.peg.633	NA	NA	NA	1	38	Cargentoratense_DSM44202,"Caurimucosum_ATCC700975","Cbelfantii_FRC0043","Ccallunae_DSM20147","Ccamporealensis_DSM44610","Cdeserti_GIMN1010","Cdiphtheriae_NCTC11397","Cdoosanense_DSM45436","Cefficiens_YS314","Cepidermidicanis_DSM45586","Cfalsenii_DSM44353","Cglutamicum_ATCC13032","Cglycinophilum_AJ3170","Chalotolerans_YIM70093","Chumireducens_DSM45392","Cimitans_DSM44264","Cjeikeium_K41","Ckroppen…	0.102614	0.0979496	1.92658	0.0979692	0.0979692	1.92261	258	0
ERS451417_02295	1717.62.peg.2324	NA	NA	NA	1	8	Cbelfantii_FRC0043,"Cdiphtheriae_NCTC11397","Cpseudotuberculosis_31","Cpseudotuberculosis_ATCC19410","Csilvaticum_KL0182","Culcerans_NCTC12077","Culcerans_NCTC7910","Cvitaeruminis_DSM20294"	0.133326	0.133326	3.06856	0.133326	0.133326	3.06856	2306	0
ERS451417_01588	1717.62.peg.1597	NA	NA	NA	1	36	Cargentoratense_DSM44202,"Caurimucosum_ATCC700975","Cbelfantii_FRC0043","Ccallunae_DSM20147","Ccamporealensis_DSM44610","Cdeserti_GIMN1010","Cdiphtheriae_NCTC11397","Cdoosanense_DSM45436","Cefficiens_YS314","Cepidermidicanis_DSM45586","Cfalsenii_DSM44353","Cglutamicum_ATCC13032","Cglycinophilum_AJ3170","Chalotolerans_YIM70093","Chumireducens_DSM45392","Cimitans_DSM44264","Cjeikeium_K41","Ckroppen…	0.223229	0.223229	1.61054	0.223229	0.223229	1.61054	258	0
ERS451417_01894	1717.62.peg.1893	NA	NA	NA	1	38	Cargentoratense_DSM44202,"Catypicum_R2070","Caurimucosum_ATCC700975","Cbelfantii_FRC0043","Ccallunae_DSM20147","Ccamporealensis_DSM44610","Cdeserti_GIMN1010","Cdiphtheriae_NCTC11397","Cdoosanense_DSM45436","Cefficiens_YS314","Cepidermidicanis_DSM45586","Cfalsenii_DSM44353","Cglutamicum_ATCC13032","Cglycinophilum_AJ3170","Chalotolerans_YIM70093","Chumireducens_DSM45392","Cimitans_DSM44264","Cjeike…	0.159625	0.159625	1.94092	0.159625	0.159625	1.94091	258	0
ERS451417_01040	1717.62.peg.1050	NA	NA	NA	1	20	Cbelfantii_FRC0043,"Ccallunae_DSM20147","Cdeserti_GIMN1010","Cdiphtheriae_NCTC11397","Cefficiens_YS314","Cglutamicum_ATCC13032","Chalotolerans_YIM70093","Chumireducens_DSM45392","Cjeikeium_K41","Cmarinum_DSM44953","Cmustelae_DSM45274","Cpseudotuberculosis_31","Cpseudotuberculosis_ATCC19410","CriegeliiPUDD83A45","Crouxii_FRC0190","Csilvaticum_KL0182","Culcerans_NCTC12077","Culcerans_NCTC7910","Cur…	0.303307	0.303307	1.7069	0.303307	0.303307	1.7069	258	0
ERS451417_01574	1717.62.peg.1583	NA	NA	NA	1	29	Cargentoratense_DSM44202,"Caurimucosum_ATCC700975","Cbelfantii_FRC0043","Ccallunae_DSM20147","Ccamporealensis_DSM44610","Cdeserti_GIMN1010","Cdiphtheriae_NCTC11397","Cdoosanense_DSM45436","Cglutamicum_ATCC13032","Chumireducens_DSM45392","Cimitans_DSM44264","Cjeikeium_K41","Ckutscheri_DSM20755","Clactis_RW25","Cmarinum_DSM44953","Cmaris_DSM45190","Cmustelae_DSM45274","Cpseudotuberculosis_31","Cpse…	0.270228	0.233667	1.78362	0.270218	0.233666	1.78363	2	1	1. 0.78926;2. 101;3. 301;4. 129;5. 105;6. 313;7. 126;8. 376;9. 214;10. V;11. GTC
ERS451417_00385	1717.62.peg.385	NA	NA	NA	1	7	Cbelfantii_FRC0043,"Cdiphtheriae_NCTC11397","Cpseudotuberculosis_ATCC19410","Crouxii_FRC0190","Csilvaticum_KL0182","Culcerans_NCTC12077","Culcerans_NCTC7910"	0.310519	0.310519	3.27018	0.310519	0.310519	3.27018	4098	1	1. 0.41734;2. 121;3. 361;4. 158;5. 138;6. 412;7. 144;8. 430;9. 232;10. M;11. ATG
ERS451417_01324	1717.62.peg.1332	NA	NA	NA	1	37	Cargentoratense_DSM44202,"Catypicum_R2070","Caurimucosum_ATCC700975","Cbelfantii_FRC0043","Ccallunae_DSM20147","Ccamporealensis_DSM44610","Cdeserti_GIMN1010","Cdiphtheriae_NCTC11397","Cdoosanense_DSM45436","Cefficiens_YS314","Cepidermidicanis_DSM45586","Cfalsenii_DSM44353","Cglutamicum_ATCC13032","Cglycinophilum_AJ3170","Chalotolerans_YIM70093","Chumireducens_DSM45392","Cimitans_DSM44264","Cjeike…	0.305398	0.207656	1.7788	0.305398	0.207656	1.7788	3074	1	1. 0.84315;2. 544;3. 1630;4. 636;5. 614;6. 1840;7. 758;8. 2272;9. 1246;10. A;11. GCA
ERS451417_00974	1717.62.peg.984	NA	NA	NA	1	36	Cargentoratense_DSM44202,"Catypicum_R2070","Caurimucosum_ATCC700975","Cbelfantii_FRC0043","Ccallunae_DSM20147","Ccamporealensis_DSM44610","Cdeserti_GIMN1010","Cdiphtheriae_NCTC11397","Cdoosanense_DSM45436","Cefficiens_YS314","Cepidermidicanis_DSM45586","Cfalsenii_DSM44353","Cglutamicum_ATCC13032","Chalotolerans_YIM70093","Chumireducens_DSM45392","Cimitans_DSM44264","Cjeikeium_K41","Ckroppenstedti…	0.207884	0.185644	1.60753	0.207875	0.185644	1.60753	2050	1	1. 0.63886;2. 126;3. 376;4. 138;5. 131;6. 391;7. 195;8. 583;9. 130;10. E;11. GAA
ERS451417_00576	1717.62.peg.579	NA	NA	NA	1	8	Cbelfantii_FRC0043,"Cdiphtheriae_NCTC11397","Cpseudotuberculosis_31","Cpseudotuberculosis_ATCC19410","Crouxii_FRC0190","Csilvaticum_KL0182","Culcerans_NCTC12077","Culcerans_NCTC7910"	0.0597445	0.0597445	2.9576	0.0597445	0.0597445	2.95763	2306	0
ERS451417_01739	1717.62.peg.1743	NA	NA	NA	1	31	Cargentoratense_DSM44202,"Catypicum_R2070","Caurimucosum_ATCC700975","Cbelfantii_FRC0043","Ccallunae_DSM20147","Ccamporealensis_DSM44610","Cdeserti_GIMN1010","Cdiphtheriae_NCTC11397","Cdoosanense_DSM45436","Cefficiens_YS314","Cepidermidicanis_DSM45586","Cglutamicum_ATCC13032","Chalotolerans_YIM70093","Chumireducens_DSM45392","Cimitans_DSM44264","Ckutscheri_DSM20755","Cmarinum_DSM44953","Cmaris_DS…	0.202356	0.202356	2.09829	0.202356	0.202356	2.09829	2306	0
ERS451417_00579	1717.62.peg.582	NA	NA	NA	1	33	Cargentoratense_DSM44202,"Catypicum_R2070","Caurimucosum_ATCC700975","Cbelfantii_FRC0043","Ccallunae_DSM20147","Ccamporealensis_DSM44610","Cdeserti_GIMN1010","Cdiphtheriae_NCTC11397","Cdoosanense_DSM45436","Cefficiens_YS314","Cepidermidicanis_DSM45586","Cglutamicum_ATCC13032","Cglycinophilum_AJ3170","Chalotolerans_YIM70093","Chumireducens_DSM45392","Cimitans_DSM44264","Ckroppenstedtii_DSM44385","…	0.158205	0.158205	2.07866	0.158205	0.158205	2.07866	258	0
ERS451417_00453	1717.62.peg.457	NA	NA	NA	1	17	Cbelfantii_FRC0043,"Ccallunae_DSM20147","Ccamporealensis_DSM44610","Cdeserti_GIMN1010","Cdiphtheriae_NCTC11397","Cepidermidicanis_DSM45586","Cglutamicum_ATCC13032","Ckroppenstedtii_DSM44385","Ckutscheri_DSM20755","Cpseudotuberculosis_31","Cpseudotuberculosis_ATCC19410","Crouxii_FRC0190","Csilvaticum_KL0182","Ctestudinoris_DSM44614","Culcerans_NCTC12077","Culcerans_NCTC7910","Cuterequi_DSM45634"	0.165536	0.165536	2.16577	0.165536	0.165536	2.16577	2306	0
ERS451417_01904	1717.62.peg.1899	NA	NA	NA	1	6	Cbelfantii_FRC0043,"Cdiphtheriae_NCTC11397","Ckutscheri_DSM20755","Cpseudotuberculosis_31","Cpseudotuberculosis_ATCC19410","Culcerans_NCTC7910"	0.126554	0.126554	2.7732	0.126554	0.126554	2.7732	2	1	1. 0.62539;2. 311;3. 931;4. 320;5. 320;6. 958;7. 346;8. 1036;9. 757;10. S;11. AGT
ERS451417_00284	1717.62.peg.285	NA	NA	NA	1	39	Cargentoratense_DSM44202,"Catypicum_R2070","Caurimucosum_ATCC700975","Cbelfantii_FRC0043","Ccallunae_DSM20147","Ccamporealensis_DSM44610","Cdeserti_GIMN1010","Cdiphtheriae_NCTC11397","Cdoosanense_DSM45436","Cefficiens_YS314","Cepidermidicanis_DSM45586","Cfalsenii_DSM44353","Cglutamicum_ATCC13032","Cglycinophilum_AJ3170","Chalotolerans_YIM70093","Chumireducens_DSM45392","Cimitans_DSM44264","Cjeike…	0.209542	0.209542	1.85161	0.209542	0.209542	1.85161	258	0
ERS451417_00640	1717.62.peg.644	NA	NA	NA	1	39	Cargentoratense_DSM44202,"Catypicum_R2070","Caurimucosum_ATCC700975","Cbelfantii_FRC0043","Ccallunae_DSM20147","Ccamporealensis_DSM44610","Cdeserti_GIMN1010","Cdiphtheriae_NCTC11397","Cdoosanense_DSM45436","Cefficiens_YS314","Cepidermidicanis_DSM45586","Cfalsenii_DSM44353","Cglutamicum_ATCC13032","Cglycinophilum_AJ3170","Chalotolerans_YIM70093","Chumireducens_DSM45392","Cimitans_DSM44264","Cjeike…	0.707064	0.131749	1.74495	0.243267	0.131749	1.74495	3330	0
ERS451417_00348	1717.62.peg.351	NA	NA	NA	1	39	Cargentoratense_DSM44202,"Catypicum_R2070","Caurimucosum_ATCC700975","Cbelfantii_FRC0043","Ccallunae_DSM20147","Ccamporealensis_DSM44610","Cdeserti_GIMN1010","Cdiphtheriae_NCTC11397","Cdoosanense_DSM45436","Cefficiens_YS314","Cepidermidicanis_DSM45586","Cfalsenii_DSM44353","Cglutamicum_ATCC13032","Cglycinophilum_AJ3170","Chalotolerans_YIM70093","Chumireducens_DSM45392","Cimitans_DSM44264","Cjeike…	0.100548	0.100548	1.80109	0.100548	0.100548	1.80108	258	0
ERS451417_00842	1717.62.peg.847	NA	NA	NA	1	39	Cargentoratense_DSM44202,"Catypicum_R2070","Caurimucosum_ATCC700975","Cbelfantii_FRC0043","Ccallunae_DSM20147","Ccamporealensis_DSM44610","Cdeserti_GIMN1010","Cdiphtheriae_NCTC11397","Cdoosanense_DSM45436","Cefficiens_YS314","Cepidermidicanis_DSM45586","Cfalsenii_DSM44353","Cglutamicum_ATCC13032","Cglycinophilum_AJ3170","Chalotolerans_YIM70093","Chumireducens_DSM45392","Cimitans_DSM44264","Cjeike…	0.165255	0.105128	1.80795	0.165323	0.105128	1.80786	2	1	1. 0.79731;2. 93;3. 277;4. 96;5. 96;6. 286;7. 96;8. 286;9. 262;10. I;11. ATC
ERS451417_00455	1717.62.peg.459	NA	NA	NA	1	30	Caurimucosum_ATCC700975,"Cbelfantii_FRC0043","Ccallunae_DSM20147","Ccamporealensis_DSM44610","Cdeserti_GIMN1010","Cdiphtheriae_NCTC11397","Cefficiens_YS314","Cepidermidicanis_DSM45586","Cglutamicum_ATCC13032","Cglycinophilum_AJ3170","Chalotolerans_YIM70093","Chumireducens_DSM45392","Ckroppenstedtii_DSM44385","Ckutscheri_DSM20755","Cmarinum_DSM44953","Cmaris_DSM45190","Cmustelae_DSM45274","Cpseudo…	0.229024	0.229024	1.92479	0.229024	0.229024	1.9248	3330	0
ERS451417_01715	1717.62.peg.1718	NA	NA	NA	1	38	Cargentoratense_DSM44202,"Catypicum_R2070","Caurimucosum_ATCC700975","Cbelfantii_FRC0043","Ccallunae_DSM20147","Ccamporealensis_DSM44610","Cdeserti_GIMN1010","Cdiphtheriae_NCTC11397","Cdoosanense_DSM45436","Cefficiens_YS314","Cepidermidicanis_DSM45586","Cfalsenii_DSM44353","Cglutamicum_ATCC13032","Cglycinophilum_AJ3170","Chalotolerans_YIM70093","Chumireducens_DSM45392","Cimitans_DSM44264","Cjeike…	0.111617	0.111617	1.78562	0.111617	0.111617	1.78562	258	0
ERS451417_00794	1717.62.peg.800	NA	NA	NA	1	36	Cargentoratense_DSM44202,"Caurimucosum_ATCC700975","Cbelfantii_FRC0043","Ccallunae_DSM20147","Ccamporealensis_DSM44610","Cdeserti_GIMN1010","Cdiphtheriae_NCTC11397","Cdoosanense_DSM45436","Cefficiens_YS314","Cepidermidicanis_DSM45586","Cfalsenii_DSM44353","Cglutamicum_ATCC13032","Cglycinophilum_AJ3170","Chalotolerans_YIM70093","Chumireducens_DSM45392","Cimitans_DSM44264","Cjeikeium_K41","Ckutsche…	0.244495	0.152983	1.99426	0.244496	0.152984	1.99426	2	1	1. 0.78387;2. 207;3. 619;4. 316;5. 316;6. 946;7. 355;8. 1063;9. 475;10. A;11. GCC
ERS451417_01925	1717.62.peg.1922	NA	NA	NA	1	11	Cbelfantii_FRC0043,"Cdiphtheriae_NCTC11397","Chalotolerans_YIM70093","Chumireducens_DSM45392","Cmaris_DSM45190","Cpseudotuberculosis_31","Cpseudotuberculosis_ATCC19410","Csilvaticum_KL0182","Culcerans_NCTC12077","Culcerans_NCTC7910","Cvitaeruminis_DSM20294"	0.373358	0.238644	2.0922	0.373358	0.238644	2.09221	2050	2	1. 0.80602;2. 113;3. 337;4. 147;5. 127;6. 379;7. 140;8. 418;9. 130;10. R;11. CGA	1. 0.79299;2. 185;3. 553;4. 219;5. 199;6. 595;7. 212;8. 634;9. 322;10. Q;11. CAA
ERS451417_02402	1717.62.peg.2434	NA	NA	NA	1	35	Cargentoratense_DSM44202,"Catypicum_R2070","Caurimucosum_ATCC700975","Cbelfantii_FRC0043","Ccallunae_DSM20147","Ccamporealensis_DSM44610","Cdeserti_GIMN1010","Cdiphtheriae_NCTC11397","Cefficiens_YS314","Cepidermidicanis_DSM45586","Cfalsenii_DSM44353","Cglutamicum_ATCC13032","Cglycinophilum_AJ3170","Chalotolerans_YIM70093","Chumireducens_DSM45392","Cimitans_DSM44264","Cjeikeium_K41","Ckroppenstedt…	0.106226	0.106226	1.64778	0.106226	0.106226	1.64778	3330	0
ERS451417_00188	1717.62.peg.184	NA	NA	NA	1	39	Cargentoratense_DSM44202,"Catypicum_R2070","Caurimucosum_ATCC700975","Cbelfantii_FRC0043","Ccallunae_DSM20147","Ccamporealensis_DSM44610","Cdeserti_GIMN1010","Cdiphtheriae_NCTC11397","Cdoosanense_DSM45436","Cefficiens_YS314","Cepidermidicanis_DSM45586","Cfalsenii_DSM44353","Cglutamicum_ATCC13032","Cglycinophilum_AJ3170","Chalotolerans_YIM70093","Chumireducens_DSM45392","Cimitans_DSM44264","Cjeike…	0.436248	0.147368	1.86544	0.436239	0.147378	1.86545	2	2	1. 0.90681;2. 223;3. 667;4. 243;5. 243;6. 727;7. 259;8. 775;9. 595;10. A;11. GCC	1. 0.90653;2. 511;3. 1531;4. 539;5. 539;6. 1615;7. 579;8. 1735;9. 1366;10. A;11. GCT
ERS451417_00998	1717.62.peg.1009	NA	NA	NA	1	39	Cargentoratense_DSM44202,"Catypicum_R2070","Caurimucosum_ATCC700975","Cbelfantii_FRC0043","Ccallunae_DSM20147","Ccamporealensis_DSM44610","Cdeserti_GIMN1010","Cdiphtheriae_NCTC11397","Cdoosanense_DSM45436","Cefficiens_YS314","Cepidermidicanis_DSM45586","Cfalsenii_DSM44353","Cglutamicum_ATCC13032","Cglycinophilum_AJ3170","Chalotolerans_YIM70093","Chumireducens_DSM45392","Cimitans_DSM44264","Cjeike…	0.114196	0.114196	1.79323	0.114205	0.114205	1.79323	258	0
ERS451417_00965	1717.62.peg.972	NA	NA	NA	1	39	Cargentoratense_DSM44202,"Catypicum_R2070","Caurimucosum_ATCC700975","Cbelfantii_FRC0043","Ccallunae_DSM20147","Ccamporealensis_DSM44610","Cdeserti_GIMN1010","Cdiphtheriae_NCTC11397","Cdoosanense_DSM45436","Cefficiens_YS314","Cepidermidicanis_DSM45586","Cfalsenii_DSM44353","Cglutamicum_ATCC13032","Cglycinophilum_AJ3170","Chalotolerans_YIM70093","Chumireducens_DSM45392","Cimitans_DSM44264","Cjeike…	0.44852	0.122718	1.70762	0.122756	0.122717	1.70761	3330	0
ERS451417_00868	1717.62.peg.873	NA	NA	NA	1	8	Cbelfantii_FRC0043,"Cdiphtheriae_NCTC11397","Cpseudotuberculosis_31","Cpseudotuberculosis_ATCC19410","Crouxii_FRC0190","Csilvaticum_KL0182","Culcerans_NCTC12077","Culcerans_NCTC7910"	0.121436	0.121436	2.99993	0.121436	0.121436	2.99993	258	0
ERS451417_00647	1717.62.peg.652	NA	NA	NA	1	16	Cbelfantii_FRC0043,"Ccallunae_DSM20147","Cdeserti_GIMN1010","Cdiphtheriae_NCTC11397","Cefficiens_YS314","Cglutamicum_ATCC13032","Chalotolerans_YIM70093","Ckutscheri_DSM20755","Cmustelae_DSM45274","Cpseudotuberculosis_31","Cpseudotuberculosis_ATCC19410","Crouxii_FRC0190","Csilvaticum_KL0182","Culcerans_NCTC12077","Culcerans_NCTC7910","Cvitaeruminis_DSM20294"	0.112985	0.112985	2.14912	0.112985	0.112985	2.14912	258	0
ERS451417_00944	1717.62.peg.951	NA	NA	NA	1	39	Cargentoratense_DSM44202,"Catypicum_R2070","Caurimucosum_ATCC700975","Cbelfantii_FRC0043","Ccallunae_DSM20147","Ccamporealensis_DSM44610","Cdeserti_GIMN1010","Cdiphtheriae_NCTC11397","Cdoosanense_DSM45436","Cefficiens_YS314","Cepidermidicanis_DSM45586","Cfalsenii_DSM44353","Cglutamicum_ATCC13032","Cglycinophilum_AJ3170","Chalotolerans_YIM70093","Chumireducens_DSM45392","Cimitans_DSM44264","Cjeike…	0.163295	0.163295	1.64797	0.163295	0.163295	1.64798	258	0
ERS451417_01701	1717.62.peg.1707	NA	NA	NA	1	8	Cbelfantii_FRC0043,"Cdiphtheriae_NCTC11397","Clactis_RW25","Cmustelae_DSM45274","Cpseudotuberculosis_ATCC19410","Csilvaticum_KL0182","Culcerans_NCTC12077","Culcerans_NCTC7910"	0.0738805	0.0738805	1.73753	0.0744552	0.0738805	1.73753	7426	0
ERS451417_01309	1717.62.peg.1317	NA	NA	NA	1	38	Cargentoratense_DSM44202,"Catypicum_R2070","Caurimucosum_ATCC700975","Cbelfantii_FRC0043","Ccallunae_DSM20147","Ccamporealensis_DSM44610","Cdeserti_GIMN1010","Cdiphtheriae_NCTC11397","Cdoosanense_DSM45436","Cefficiens_YS314","Cepidermidicanis_DSM45586","Cfalsenii_DSM44353","Cglutamicum_ATCC13032","Cglycinophilum_AJ3170","Chalotolerans_YIM70093","Chumireducens_DSM45392","Cimitans_DSM44264","Cjeike…	0.245589	0.122107	1.56158	0.245599	0.122107	1.56158	2	1	1. 0.84639;2. 102;3. 304;4. 127;5. 127;6. 379;7. 129;8. 385;9. 289;10. D;11. GAT
ERS451417_02396	1717.62.peg.2428	NA	NA	NA	1	38	Cargentoratense_DSM44202,"Catypicum_R2070","Caurimucosum_ATCC700975","Cbelfantii_FRC0043","Ccallunae_DSM20147","Ccamporealensis_DSM44610","Cdeserti_GIMN1010","Cdiphtheriae_NCTC11397","Cdoosanense_DSM45436","Cefficiens_YS314","Cepidermidicanis_DSM45586","Cfalsenii_DSM44353","Cglutamicum_ATCC13032","Cglycinophilum_AJ3170","Chalotolerans_YIM70093","Chumireducens_DSM45392","Cimitans_DSM44264","Cjeike…	0.181101	0.181101	1.81568	0.181101	0.181101	1.81569	1282	0
ERS451417_00768	1717.62.peg.773	NA	NA	NA	1	39	Cargentoratense_DSM44202,"Catypicum_R2070","Caurimucosum_ATCC700975","Cbelfantii_FRC0043","Ccallunae_DSM20147","Ccamporealensis_DSM44610","Cdeserti_GIMN1010","Cdiphtheriae_NCTC11397","Cdoosanense_DSM45436","Cefficiens_YS314","Cepidermidicanis_DSM45586","Cfalsenii_DSM44353","Cglutamicum_ATCC13032","Cglycinophilum_AJ3170","Chalotolerans_YIM70093","Chumireducens_DSM45392","Cimitans_DSM44264","Cjeike…	0.0685201	0.0685201	2.05437	0.0685201	0.0685201	2.05437	1282	0
ERS451417_00799	1717.62.peg.805	NA	NA	NA	1	7	Cbelfantii_FRC0043,"Cdiphtheriae_NCTC11397","Cpseudotuberculosis_31","Cpseudotuberculosis_ATCC19410","Crouxii_FRC0190","Culcerans_NCTC12077","Culcerans_NCTC7910"	0.0913189	0.0913189	2.21481	0.0913189	0.0913189	2.21481	258	0
ERS451417_01833	1717.62.peg.1836	NA	NA	NA	1	8	Cbelfantii_FRC0043,"Cdiphtheriae_NCTC11397","Ckutscheri_DSM20755","Cpseudotuberculosis_31","Cpseudotuberculosis_ATCC19410","Csilvaticum_KL0182","Culcerans_NCTC12077","Culcerans_NCTC7910"	0.112696	0.112696	2.38381	0.112696	0.112696	2.3838	258	0
ERS451417_02361	1717.62.peg.2390	NA	NA	NA	1	12	Caurimucosum_ATCC700975,"Cbelfantii_FRC0043","Cdiphtheriae_NCTC11397","Ckroppenstedtii_DSM44385","Cpseudotuberculosis_31","Cpseudotuberculosis_ATCC19410","Csilvaticum_KL0182","Csimulans_PES1","Csingulare_IBSB52218","Culcerans_NCTC12077","Culcerans_NCTC7910","Cuterequi_DSM45634"	0.291177	0.194968	2.73657	0.291177	0.194968	2.73657	2	1	1. 0.74846;2. 32;3. 94;4. 36;5. 36;6. 106;7. 36;8. 106;9. 85;10. A;11. GCG
ERS451417_00631	1717.62.peg.635	NA	NA	NA	1	14	Cargentoratense_DSM44202,"Cbelfantii_FRC0043","Ccallunae_DSM20147","Cdiphtheriae_NCTC11397","Cefficiens_YS314","Chalotolerans_YIM70093","Ckutscheri_DSM20755","Cmustelae_DSM45274","Cpseudotuberculosis_ATCC19410","Crouxii_FRC0190","Csilvaticum_KL0182","Ctestudinoris_DSM44614","Culcerans_NCTC7910","Cvitaeruminis_DSM20294"	0.0828317	0.0828317	1.78211	0.0828317	0.0828317	1.78211	6402	0
ERS451417_02267	1717.62.peg.2296	NA	NA	NA	1	11	Cbelfantii_FRC0043,"Cdiphtheriae_NCTC11397","Cepidermidicanis_DSM45586","Ckutscheri_DSM20755","Cpseudotuberculosis_31","Cpseudotuberculosis_ATCC19410","Csilvaticum_KL0182","Ctestudinoris_DSM44614","Culcerans_NCTC12077","Culcerans_NCTC7910","Cvitaeruminis_DSM20294"	0.241501	0.241501	2.23914	0.241501	0.241501	2.23914	258	0
ERS451417_02386	1717.62.peg.2418	NA	NA	NA	1	38	Cargentoratense_DSM44202,"Catypicum_R2070","Caurimucosum_ATCC700975","Cbelfantii_FRC0043","Ccallunae_DSM20147","Ccamporealensis_DSM44610","Cdeserti_GIMN1010","Cdiphtheriae_NCTC11397","Cdoosanense_DSM45436","Cefficiens_YS314","Cepidermidicanis_DSM45586","Cfalsenii_DSM44353","Cglutamicum_ATCC13032","Cglycinophilum_AJ3170","Chalotolerans_YIM70093","Chumireducens_DSM45392","Cimitans_DSM44264","Cjeike…	0.26335	0.188993	1.58683	0.1941	0.188993	1.58683	1282	0
ERS451417_01682	1717.62.peg.1689	NA	NA	NA	1	11	Ccamporealensis_DSM44610,"Cdiphtheriae_NCTC11397","Cmaris_DSM45190","Cmustelae_DSM45274","Cpseudotuberculosis_31","Cpseudotuberculosis_ATCC19410","Culcerans_NCTC12077","Culcerans_NCTC7910","Cureicelerivorans_IMMIBRIV2301","Cuterequi_DSM45634","Cvitaeruminis_DSM20294"	0.343493	0.343493	1.75867	0.343493	0.343493	1.75867	258	0
ERS451417_02371	1717.62.peg.2401	NA	NA	NA	1	33	Cargentoratense_DSM44202,"Catypicum_R2070","Caurimucosum_ATCC700975","Cbelfantii_FRC0043","Ccallunae_DSM20147","Ccamporealensis_DSM44610","Cdeserti_GIMN1010","Cdiphtheriae_NCTC11397","Cdoosanense_DSM45436","Cefficiens_YS314","Cepidermidicanis_DSM45586","Cglutamicum_ATCC13032","Chalotolerans_YIM70093","Chumireducens_DSM45392","Cimitans_DSM44264","Ckutscheri_DSM20755","Clactis_RW25","Cmarinum_DSM44…	0.158952	0.146994	1.72621	0.158952	0.146994	1.72621	2	1	1. 0.70479;2. 351;3. 1051;4. 358;5. 358;6. 1072;7. 361;8. 1081;9. 928;10. R;11. CGT
ERS451417_00291	1717.62.peg.292	NA	NA	NA	1	39	Cargentoratense_DSM44202,"Catypicum_R2070","Caurimucosum_ATCC700975","Cbelfantii_FRC0043","Ccallunae_DSM20147","Ccamporealensis_DSM44610","Cdeserti_GIMN1010","Cdiphtheriae_NCTC11397","Cdoosanense_DSM45436","Cefficiens_YS314","Cepidermidicanis_DSM45586","Cfalsenii_DSM44353","Cglutamicum_ATCC13032","Cglycinophilum_AJ3170","Chalotolerans_YIM70093","Chumireducens_DSM45392","Cimitans_DSM44264","Cjeike…	0.0989458	0.0989458	1.76154	0.0989458	0.0989458	1.76154	258	0
ERS451417_00627	1717.62.peg.631	NA	NA	NA	1	27	Cargentoratense_DSM44202,"Catypicum_R2070","Cbelfantii_FRC0043","Ccallunae_DSM20147","Cdeserti_GIMN1010","Cdiphtheriae_NCTC11397","Cdoosanense_DSM45436","Cefficiens_YS314","Cfalsenii_DSM44353","Cglutamicum_ATCC13032","Cglycinophilum_AJ3170","Chalotolerans_YIM70093","Cjeikeium_K41","Ckutscheri_DSM20755","Clactis_RW25","Cmaris_DSM45190","Cmustelae_DSM45274","Cpseudotuberculosis_31","Cpseudotubercul…	0.147485	0.147485	1.66684	0.147485	0.147485	1.66684	258	0
ERS451417_01623	1717.62.peg.1631	NA	NA	NA	1	38	Cargentoratense_DSM44202,"Catypicum_R2070","Caurimucosum_ATCC700975","Cbelfantii_FRC0043","Ccallunae_DSM20147","Ccamporealensis_DSM44610","Cdeserti_GIMN1010","Cdiphtheriae_NCTC11397","Cdoosanense_DSM45436","Cefficiens_YS314","Cepidermidicanis_DSM45586","Cfalsenii_DSM44353","Cglutamicum_ATCC13032","Cglycinophilum_AJ3170","Chalotolerans_YIM70093","Chumireducens_DSM45392","Cimitans_DSM44264","Cjeike…	0.114367	0.114367	1.63105	0.114367	0.114367	1.63105	2	1	1. 0.53079;2. 67;3. 199;4. 76;5. 76;6. 226;7. 76;8. 226;9. 196;10. V;11. GTC
ERS451417_01425	1717.62.peg.1431	NA	NA	NA	1	37	Cargentoratense_DSM44202,"Catypicum_R2070","Caurimucosum_ATCC700975","Cbelfantii_FRC0043","Ccallunae_DSM20147","Ccamporealensis_DSM44610","Cdeserti_GIMN1010","Cdiphtheriae_NCTC11397","Cdoosanense_DSM45436","Cefficiens_YS314","Cepidermidicanis_DSM45586","Cfalsenii_DSM44353","Cglutamicum_ATCC13032","Cglycinophilum_AJ3170","Chalotolerans_YIM70093","Chumireducens_DSM45392","Cimitans_DSM44264","Cjeike…	0.185407	0.185407	1.41522	0.185407	0.185407	1.41522	258	0
ERS451417_01166	1717.62.peg.1177	NA	NA	NA	1	39	Cargentoratense_DSM44202,"Catypicum_R2070","Caurimucosum_ATCC700975","Cbelfantii_FRC0043","Ccallunae_DSM20147","Ccamporealensis_DSM44610","Cdeserti_GIMN1010","Cdiphtheriae_NCTC11397","Cdoosanense_DSM45436","Cefficiens_YS314","Cepidermidicanis_DSM45586","Cfalsenii_DSM44353","Cglutamicum_ATCC13032","Cglycinophilum_AJ3170","Chalotolerans_YIM70093","Chumireducens_DSM45392","Cimitans_DSM44264","Cjeike…	0.104388	0.104388	1.84297	0.104388	0.104388	1.84297	258	0
ERS451417_01799	1717.62.peg.1804	NA	NA	NA	1	38	Cargentoratense_DSM44202,"Catypicum_R2070","Caurimucosum_ATCC700975","Cbelfantii_FRC0043","Ccallunae_DSM20147","Ccamporealensis_DSM44610","Cdeserti_GIMN1010","Cdiphtheriae_NCTC11397","Cdoosanense_DSM45436","Cefficiens_YS314","Cepidermidicanis_DSM45586","Cfalsenii_DSM44353","Cglutamicum_ATCC13032","Cglycinophilum_AJ3170","Chalotolerans_YIM70093","Chumireducens_DSM45392","Cimitans_DSM44264","Cjeike…	0.156473	0.156473	2.08717	0.156473	0.156473	2.08717	258	0
ERS451417_00915	1717.62.peg.922	NA	NA	NA	1	19	Catypicum_R2070,"Cbelfantii_FRC0043","Ccamporealensis_DSM44610","Cdiphtheriae_NCTC11397","Cepidermidicanis_DSM45586","Cfalsenii_DSM44353","Cglycinophilum_AJ3170","Cjeikeium_K41","Ckroppenstedtii_DSM44385","Clactis_RW25","Cpseudotuberculosis_31","Cpseudotuberculosis_ATCC19410","Crouxii_FRC0190","Csilvaticum_KL0182","Csimulans_PES1","Culcerans_NCTC12077","Culcerans_NCTC7910","Cuterequi_DSM45634","C…	0.286475	0.161807	1.77583	0.286475	0.161807	1.77583	2050	1	1. 0.81737;2. 166;3. 496;4. 175;5. 172;6. 514;7. 179;8. 535;9. 106;10. A;11. GCC
ERS451417_00200	1717.62.peg.197	NA	NA	NA	1	39	Cargentoratense_DSM44202,"Catypicum_R2070","Caurimucosum_ATCC700975","Cbelfantii_FRC0043","Ccallunae_DSM20147","Ccamporealensis_DSM44610","Cdeserti_GIMN1010","Cdiphtheriae_NCTC11397","Cdoosanense_DSM45436","Cefficiens_YS314","Cepidermidicanis_DSM45586","Cfalsenii_DSM44353","Cglutamicum_ATCC13032","Cglycinophilum_AJ3170","Chalotolerans_YIM70093","Chumireducens_DSM45392","Cimitans_DSM44264","Cjeike…	1.51372	0.194175	2.03351	0.194221	0.194221	2.03233	256	0
ERS451417_01511	1717.62.peg.1519	NA	NA	NA	1	19	Caurimucosum_ATCC700975,"Cbelfantii_FRC0043","Ccallunae_DSM20147","Cdiphtheriae_NCTC11397","Cepidermidicanis_DSM45586","Cfalsenii_DSM44353","Cglutamicum_ATCC13032","Cglycinophilum_AJ3170","Chumireducens_DSM45392","Cjeikeium_K41","Ckroppenstedtii_DSM44385","Clactis_RW25","Cpseudotuberculosis_31","Cpseudotuberculosis_ATCC19410","Csilvaticum_KL0182","Csimulans_PES1","Culcerans_NCTC12077","Culcerans_…	0.208038	0.208038	1.87274	0.208038	0.208038	1.87274	1282	0
ERS451417_00542	1717.62.peg.546	NA	NA	NA	1	38	Cargentoratense_DSM44202,"Catypicum_R2070","Caurimucosum_ATCC700975","Cbelfantii_FRC0043","Ccallunae_DSM20147","Ccamporealensis_DSM44610","Cdeserti_GIMN1010","Cdiphtheriae_NCTC11397","Cdoosanense_DSM45436","Cefficiens_YS314","Cepidermidicanis_DSM45586","Cfalsenii_DSM44353","Cglutamicum_ATCC13032","Chalotolerans_YIM70093","Chumireducens_DSM45392","Cimitans_DSM44264","Cjeikeium_K41","Ckroppenstedti…	0.302889	0.302889	1.59949	0.302889	0.302889	1.59949	3330	0
ERS451417_00450	1717.62.peg.453	NA	NA	NA	1	15	Cbelfantii_FRC0043,"Ccallunae_DSM20147","Cdeserti_GIMN1010","Cdiphtheriae_NCTC11397","Cepidermidicanis_DSM45586","Cglutamicum_ATCC13032","Ckutscheri_DSM20755","Cmustelae_DSM45274","Cpseudotuberculosis_31","Cpseudotuberculosis_ATCC19410","Crouxii_FRC0190","Csilvaticum_KL0182","Ctestudinoris_DSM44614","Culcerans_NCTC12077","Culcerans_NCTC7910"	0.170372	0.122287	1.87623	0.170382	0.122297	1.87623	2	2	1. 0.80714;2. 76;3. 226;4. 79;5. 79;6. 235;7. 97;8. 289;9. 124;10. S;11. TCT	1. 0.48741;2. 473;3. 1417;4. 484;5. 478;6. 1432;7. 501;8. 1501;9. 1246;10. V;11. GTT
ERS451417_00729	1717.62.peg.732	NA	NA	NA	1	15	Cargentoratense_DSM44202,"Cbelfantii_FRC0043","Cdiphtheriae_NCTC11397","Cepidermidicanis_DSM45586","Ckroppenstedtii_DSM44385","Ckutscheri_DSM20755","Clactis_RW25","Cmustelae_DSM45274","Cpseudotuberculosis_31","Cpseudotuberculosis_ATCC19410","Crouxii_FRC0190","Csilvaticum_KL0182","Culcerans_NCTC12077","Culcerans_NCTC7910","Cvitaeruminis_DSM20294"	0.16175	0.16175	2.45347	0.16175	0.16175	2.45347	3330	0
ERS451417_00581	1717.62.peg.584	NA	NA	NA	1	9	Cargentoratense_DSM44202,"Cbelfantii_FRC0043","Ccallunae_DSM20147","Cdiphtheriae_NCTC11397","Cglutamicum_ATCC13032","Ckutscheri_DSM20755","Cpseudotuberculosis_ATCC19410","Crouxii_FRC0190","Cvitaeruminis_DSM20294"	0.144562	0.144562	1.61183	0.144552	0.144552	1.61183	6402	0
ERS451417_01680	1717.62.peg.1687	NA	NA	NA	1	38	Cargentoratense_DSM44202,"Catypicum_R2070","Caurimucosum_ATCC700975","Cbelfantii_FRC0043","Ccallunae_DSM20147","Ccamporealensis_DSM44610","Cdeserti_GIMN1010","Cdiphtheriae_NCTC11397","Cdoosanense_DSM45436","Cefficiens_YS314","Cepidermidicanis_DSM45586","Cfalsenii_DSM44353","Cglutamicum_ATCC13032","Cglycinophilum_AJ3170","Chalotolerans_YIM70093","Chumireducens_DSM45392","Cimitans_DSM44264","Cjeike…	0.29937	0.208433	1.64964	0.29937	0.208433	1.64964	3074	5	1. 0.74921;2. 264;3. 790;4. 412;5. 412;6. 1234;7. 617;8. 1849;9. 250;10. A;11. GCG	1. 0.76182;2. 444;3. 1330;4. 593;5. 593;6. 1777;7. 798;8. 2392;9. 784;10. I;11. ATT	1. 0.74751;2. 694;3. 2080;4. 849;5. 849;6. 2545;7. 1054;8. 3160;9. 1489;10. D;11. GAT	1. 0.68739;2. 892;3. 2674;4. 1109;5. 1109;6. 3325;7. 1346;8. 4036;9. 1990;10. V;11. GTG	1. 0.43846;2. 961;3. 2881;4. 1178;5. 1178;6. 3532;7. 1415;8. 4243;9. 2191;10. V;11. GTG
ERS451417_01235	1717.62.peg.1243	NA	NA	NA	1	15	Cargentoratense_DSM44202,"Cbelfantii_FRC0043","Cdiphtheriae_NCTC11397","Cepidermidicanis_DSM45586","Ckroppenstedtii_DSM44385","Ckutscheri_DSM20755","Clactis_RW25","Cmustelae_DSM45274","Cpseudotuberculosis_31","Cpseudotuberculosis_ATCC19410","Crouxii_FRC0190","Csilvaticum_KL0182","Culcerans_NCTC12077","Culcerans_NCTC7910","Cvitaeruminis_DSM20294"	0.145788	0.145788	2.60643	0.265329	0.145878	2.61488	2050	1	1. 0.80278;2. 248;3. 742;4. 248;5. 248;6. 742;7. 248;8. 742;9. 574;10. E;11. GAG
ERS451417_02122	1717.62.peg.2137	NA	NA	NA	1	38	Cargentoratense_DSM44202,"Catypicum_R2070","Caurimucosum_ATCC700975","Cbelfantii_FRC0043","Ccallunae_DSM20147","Ccamporealensis_DSM44610","Cdeserti_GIMN1010","Cdiphtheriae_NCTC11397","Cdoosanense_DSM45436","Cefficiens_YS314","Cepidermidicanis_DSM45586","Cfalsenii_DSM44353","Cglutamicum_ATCC13032","Cglycinophilum_AJ3170","Chalotolerans_YIM70093","Chumireducens_DSM45392","Cimitans_DSM44264","Cjeike…	0.219128	0.160369	1.82738	0.219128	0.160369	1.82738	1026	1	1. 0.67131;2. 210;3. 628;4. 239;5. 239;6. 715;7. 342;8. 1024;9. 517;10. A;11. GCG
ERS451417_02308	1717.62.peg.2335	NA	NA	NA	1	38	Cargentoratense_DSM44202,"Catypicum_R2070","Caurimucosum_ATCC700975","Cbelfantii_FRC0043","Ccallunae_DSM20147","Ccamporealensis_DSM44610","Cdeserti_GIMN1010","Cdiphtheriae_NCTC11397","Cdoosanense_DSM45436","Cefficiens_YS314","Cepidermidicanis_DSM45586","Cfalsenii_DSM44353","Cglutamicum_ATCC13032","Cglycinophilum_AJ3170","Chalotolerans_YIM70093","Chumireducens_DSM45392","Cimitans_DSM44264","Cjeike…	0.315042	0.107086	1.63465	0.201451	0.107076	1.63465	3330	0
ERS451417_00541	1717.62.peg.545	NA	NA	NA	1	9	Cbelfantii_FRC0043,"Cdiphtheriae_NCTC11397","Cglycinophilum_AJ3170","Cpseudotuberculosis_31","Cpseudotuberculosis_ATCC19410","Crouxii_FRC0190","Csilvaticum_KL0182","Culcerans_NCTC12077","Culcerans_NCTC7910"	0.0742911	0.0742911	2.51625	0.0742911	0.0742911	2.51627	258	0
ERS451417_01161	1717.62.peg.1172	NA	NA	NA	1	37	Cargentoratense_DSM44202,"Caurimucosum_ATCC700975","Cbelfantii_FRC0043","Ccallunae_DSM20147","Ccamporealensis_DSM44610","Cdeserti_GIMN1010","Cdiphtheriae_NCTC11397","Cdoosanense_DSM45436","Cefficiens_YS314","Cepidermidicanis_DSM45586","Cfalsenii_DSM44353","Cglutamicum_ATCC13032","Cglycinophilum_AJ3170","Chalotolerans_YIM70093","Chumireducens_DSM45392","Cimitans_DSM44264","Cjeikeium_K41","Ckroppen…	0.298794	0.221526	1.37843	0.298784	0.221516	1.37843	1026	1	1. 0.8171;2. 127;3. 379;4. 166;5. 166;6. 496;7. 245;8. 733;9. 286;10. G;11. GGC
ERS451417_00388	1717.62.peg.388	NA	NA	NA	1	18	Cbelfantii_FRC0043,"Cdiphtheriae_NCTC11397","Cepidermidicanis_DSM45586","Chumireducens_DSM45392","Ckutscheri_DSM20755","Clactis_RW25","Cmarinum_DSM44953","Cmustelae_DSM45274","Cpseudotuberculosis_31","Cpseudotuberculosis_ATCC19410","Crouxii_FRC0190","Csilvaticum_KL0182","Csimulans_PES1","Ctestudinoris_DSM44614","Culcerans_NCTC12077","Culcerans_NCTC7910","Curealyticum_DSM7109","Cvitaeruminis_DSM20…	0.141457	0.141457	1.78785	0.141457	0.141457	1.78785	258	0
ERS451417_02309	1717.62.peg.2336	NA	NA	NA	1	31	Catypicum_R2070,"Caurimucosum_ATCC700975","Cbelfantii_FRC0043","Ccallunae_DSM20147","Ccamporealensis_DSM44610","Cdeserti_GIMN1010","Cdiphtheriae_NCTC11397","Cdoosanense_DSM45436","Cefficiens_YS314","Cepidermidicanis_DSM45586","Cglutamicum_ATCC13032","Cglycinophilum_AJ3170","Chalotolerans_YIM70093","Chumireducens_DSM45392","Ckutscheri_DSM20755","Cmarinum_DSM44953","Cmaris_DSM45190","Cmustelae_DSM4…	0.471882	0.471882	1.65752	0.471882	0.471882	1.65752	2306	0
ERS451417_02145	1717.62.peg.2167	NA	NA	NA	1	38	Cargentoratense_DSM44202,"Catypicum_R2070","Caurimucosum_ATCC700975","Cbelfantii_FRC0043","Ccallunae_DSM20147","Ccamporealensis_DSM44610","Cdeserti_GIMN1010","Cdiphtheriae_NCTC11397","Cdoosanense_DSM45436","Cefficiens_YS314","Cepidermidicanis_DSM45586","Cfalsenii_DSM44353","Cglutamicum_ATCC13032","Cglycinophilum_AJ3170","Chalotolerans_YIM70093","Chumireducens_DSM45392","Cimitans_DSM44264","Cjeike…	0.156193	0.114189	1.69458	0.156232	0.114189	1.69464	2	1	1. 0.76881;2. 241;3. 721;4. 243;5. 243;6. 727;7. 243;8. 727;9. 685;10. A;11. GCA
ERS451417_01864	1717.62.peg.1866	NA	NA	NA	1	38	Cargentoratense_DSM44202,"Catypicum_R2070","Caurimucosum_ATCC700975","Cbelfantii_FRC0043","Ccallunae_DSM20147","Ccamporealensis_DSM44610","Cdeserti_GIMN1010","Cdiphtheriae_NCTC11397","Cdoosanense_DSM45436","Cefficiens_YS314","Cepidermidicanis_DSM45586","Cfalsenii_DSM44353","Cglutamicum_ATCC13032","Cglycinophilum_AJ3170","Chalotolerans_YIM70093","Chumireducens_DSM45392","Cimitans_DSM44264","Cjeike…	0.0995232	0.0995232	1.91486	0.0995232	0.0995232	1.91486	3330	0
ERS451417_00129	1717.62.peg.127	NA	NA	NA	1	39	Cargentoratense_DSM44202,"Catypicum_R2070","Caurimucosum_ATCC700975","Cbelfantii_FRC0043","Ccallunae_DSM20147","Ccamporealensis_DSM44610","Cdeserti_GIMN1010","Cdiphtheriae_NCTC11397","Cdoosanense_DSM45436","Cefficiens_YS314","Cepidermidicanis_DSM45586","Cfalsenii_DSM44353","Cglutamicum_ATCC13032","Cglycinophilum_AJ3170","Chalotolerans_YIM70093","Chumireducens_DSM45392","Cimitans_DSM44264","Cjeike…	0.24747	0.0977819	1.95439	0.254492	0.0977632	1.95451	2	1	1. 0.85578;2. 460;3. 1378;4. 475;5. 475;6. 1423;7. 533;8. 1597;9. 1117;10. G;11. GGT
ERS451417_01635	1717.62.peg.1642	NA	NA	NA	1	22	Cargentoratense_DSM44202,"Cbelfantii_FRC0043","Ccallunae_DSM20147","Cdeserti_GIMN1010","Cdiphtheriae_NCTC11397","Cefficiens_YS314","Cepidermidicanis_DSM45586","Cfalsenii_DSM44353","Cglutamicum_ATCC13032","Cglycinophilum_AJ3170","Cjeikeium_K41","Ckroppenstedtii_DSM44385","Clactis_RW25","Cmustelae_DSM45274","Cpseudotuberculosis_31","Cpseudotuberculosis_ATCC19410","Csilvaticum_KL0182","Cterpenotabid…	0.151513	0.151513	1.91827	0.151513	0.151513	1.91827	3330	0
ERS451417_01965	1717.62.peg.1965	NA	NA	NA	1	10	Cbelfantii_FRC0043,"Cdiphtheriae_NCTC11397","Ckutscheri_DSM20755","Cmustelae_DSM45274","Cpseudotuberculosis_31","Cpseudotuberculosis_ATCC19410","Csilvaticum_KL0182","Culcerans_NCTC12077","Culcerans_NCTC7910","Cvitaeruminis_DSM20294"	0.072002	0.072002	2.3075	0.072002	0.072002	2.30749	2	2	1. 0.51292;2. 185;3. 553;4. 185;5. 185;6. 553;7. 186;8. 556;9. 433;10. I;11. ATC	1. 0.46999;2. 457;3. 1369;4. 457;5. 457;6. 1369;7. 458;8. 1372;9. 1249;10. L;11. TTA
ERS451417_01249	1717.62.peg.1257	NA	NA	NA	1	39	Cargentoratense_DSM44202,"Catypicum_R2070","Caurimucosum_ATCC700975","Cbelfantii_FRC0043","Ccallunae_DSM20147","Ccamporealensis_DSM44610","Cdeserti_GIMN1010","Cdiphtheriae_NCTC11397","Cdoosanense_DSM45436","Cefficiens_YS314","Cepidermidicanis_DSM45586","Cfalsenii_DSM44353","Cglutamicum_ATCC13032","Cglycinophilum_AJ3170","Chalotolerans_YIM70093","Chumireducens_DSM45392","Cimitans_DSM44264","Cjeike…	0.437675	0.13802	1.78102	0.253627	0.13802	1.78102	258	0
ERS451417_01539	1717.62.peg.1548	NA	NA	NA	1	38	Cargentoratense_DSM44202,"Catypicum_R2070","Caurimucosum_ATCC700975","Cbelfantii_FRC0043","Ccallunae_DSM20147","Ccamporealensis_DSM44610","Cdeserti_GIMN1010","Cdiphtheriae_NCTC11397","Cdoosanense_DSM45436","Cefficiens_YS314","Cepidermidicanis_DSM45586","Cfalsenii_DSM44353","Cglutamicum_ATCC13032","Cglycinophilum_AJ3170","Chalotolerans_YIM70093","Chumireducens_DSM45392","Cimitans_DSM44264","Cjeike…	0.0418777	0.0418777	1.38684	0.0418777	0.0418777	1.38684	258	0
ERS451417_01843	1717.62.peg.1846	NA	NA	NA	1	25	Cargentoratense_DSM44202,"Caurimucosum_ATCC700975","Cbelfantii_FRC0043","Ccallunae_DSM20147","Ccamporealensis_DSM44610","Cdeserti_GIMN1010","Cdiphtheriae_NCTC11397","Cefficiens_YS314","Cepidermidicanis_DSM45586","Cglutamicum_ATCC13032","Chalotolerans_YIM70093","Chumireducens_DSM45392","Ckutscheri_DSM20755","Clactis_RW25","Cmarinum_DSM44953","Cmaris_DSM45190","Cmustelae_DSM45274","Cpseudotuberculo…	0.113898	0.113898	1.67464	0.113898	0.113898	1.67464	3330	0
ERS451417_01934	1717.62.peg.1931	NA	NA	NA	1	22	Catypicum_R2070,"Caurimucosum_ATCC700975","Cbelfantii_FRC0043","Ccallunae_DSM20147","Ccamporealensis_DSM44610","Cdeserti_GIMN1010","Cdiphtheriae_NCTC11397","Cefficiens_YS314","Cglutamicum_ATCC13032","Chalotolerans_YIM70093","Chumireducens_DSM45392","Ckutscheri_DSM20755","Cmustelae_DSM45274","Cpseudotuberculosis_31","Cpseudotuberculosis_ATCC19410","Csilvaticum_KL0182","Csimulans_PES1","Csingulare_…	0.308946	0.308946	2.51963	0.308946	0.308946	2.51963	3330	0
ERS451417_00673	1717.62.peg.680	NA	NA	NA	1	16	Cargentoratense_DSM44202,"Cbelfantii_FRC0043","Cdiphtheriae_NCTC11397","Cefficiens_YS314","Cepidermidicanis_DSM45586","Ckroppenstedtii_DSM44385","Ckutscheri_DSM20755","Clactis_RW25","Cmustelae_DSM45274","Cpseudotuberculosis_31","Cpseudotuberculosis_ATCC19410","Crouxii_FRC0190","Csilvaticum_KL0182","Culcerans_NCTC12077","Culcerans_NCTC7910","Cvitaeruminis_DSM20294"	0.199114	0.199114	1.88923	0.199114	0.199114	1.88923	258	0
ERS451417_01209	1717.62.peg.1217	NA	NA	NA	1	32	Cargentoratense_DSM44202,"Catypicum_R2070","Cbelfantii_FRC0043","Ccallunae_DSM20147","Cdeserti_GIMN1010","Cdiphtheriae_NCTC11397","Cefficiens_YS314","Cepidermidicanis_DSM45586","Cfalsenii_DSM44353","Cglutamicum_ATCC13032","Cglycinophilum_AJ3170","Chalotolerans_YIM70093","Chumireducens_DSM45392","Cimitans_DSM44264","Cjeikeium_K41","Ckroppenstedtii_DSM44385","Ckutscheri_DSM20755","Clactis_RW25","Cm…	0.212171	0.212171	1.50112	0.212171	0.212171	1.50112	3330	0
ERS451417_02054	1717.62.peg.2066	NA	NA	NA	1	10	Cbelfantii_FRC0043,"Cdiphtheriae_NCTC11397","Cepidermidicanis_DSM45586","Cmustelae_DSM45274","Cpseudotuberculosis_31","Cpseudotuberculosis_ATCC19410","Csilvaticum_KL0182","Culcerans_NCTC12077","Culcerans_NCTC7910","Cvitaeruminis_DSM20294"	69.7899	0.0646657	2.28434	0.0654106	0.0654106	2.26801	256	0
ERS451417_01607	1717.62.peg.1616	NA	NA	NA	1	5	Cbelfantii_FRC0043,"Cdiphtheriae_NCTC11397","Cpseudotuberculosis_ATCC19410","Culcerans_NCTC12077","Culcerans_NCTC7910"	0.25914	0.25914	3.001	0.25914	0.25914	3.00101	4354	0
ERS451417_00136	1717.62.peg.135	NA	NA	NA	1	12	Cbelfantii_FRC0043,"Cdiphtheriae_NCTC11397","Chumireducens_DSM45392","Cmaris_DSM45190","Cmustelae_DSM45274","Cpseudotuberculosis_31","Cpseudotuberculosis_ATCC19410","Crouxii_FRC0190","Culcerans_NCTC12077","Culcerans_NCTC7910","Cuterequi_DSM45634","Cvitaeruminis_DSM20294"	0.12105	0.12105	2.12568	0.12105	0.12105	2.12567	2306	0
ERS451417_00097	1717.62.peg.95	NA	NA	NA	1	31	Catypicum_R2070,"Caurimucosum_ATCC700975","Cbelfantii_FRC0043","Ccallunae_DSM20147","Ccamporealensis_DSM44610","Cdeserti_GIMN1010","Cdiphtheriae_NCTC11397","Cdoosanense_DSM45436","Cefficiens_YS314","Cepidermidicanis_DSM45586","Cglutamicum_ATCC13032","Chalotolerans_YIM70093","Chumireducens_DSM45392","Cimitans_DSM44264","Ckutscheri_DSM20755","Cmarinum_DSM44953","Cmaris_DSM45190","Cmustelae_DSM45274…	0.178981	0.143551	1.40675	0.178962	0.143551	1.40675	2050	1	1. 0.73526;2. 278;3. 832;4. 338;5. 326;6. 976;7. 353;8. 1057;9. 592;10. E;11. GAG
ERS451417_00140	1717.62.peg.139	NA	NA	NA	1	39	Cargentoratense_DSM44202,"Catypicum_R2070","Caurimucosum_ATCC700975","Cbelfantii_FRC0043","Ccallunae_DSM20147","Ccamporealensis_DSM44610","Cdeserti_GIMN1010","Cdiphtheriae_NCTC11397","Cdoosanense_DSM45436","Cefficiens_YS314","Cepidermidicanis_DSM45586","Cfalsenii_DSM44353","Cglutamicum_ATCC13032","Cglycinophilum_AJ3170","Chalotolerans_YIM70093","Chumireducens_DSM45392","Cimitans_DSM44264","Cjeike…	0.0568337	0.0568239	2.22647	0.0568828	0.0568239	2.22648	1282	0
ERS451417_01491	1717.62.peg.1499	NA	NA	NA	1	38	Cargentoratense_DSM44202,"Catypicum_R2070","Caurimucosum_ATCC700975","Cbelfantii_FRC0043","Ccallunae_DSM20147","Ccamporealensis_DSM44610","Cdeserti_GIMN1010","Cdiphtheriae_NCTC11397","Cdoosanense_DSM45436","Cefficiens_YS314","Cepidermidicanis_DSM45586","Cfalsenii_DSM44353","Cglutamicum_ATCC13032","Cglycinophilum_AJ3170","Chalotolerans_YIM70093","Chumireducens_DSM45392","Cimitans_DSM44264","Cjeike…	0.214228	0.214228	1.79328	0.214228	0.214228	1.7933	2306	0
ERS451417_01785	1717.62.peg.1790	NA	NA	NA	1	34	Catypicum_R2070,"Caurimucosum_ATCC700975","Cbelfantii_FRC0043","Ccallunae_DSM20147","Cdeserti_GIMN1010","Cdiphtheriae_NCTC11397","Cdoosanense_DSM45436","Cefficiens_YS314","Cepidermidicanis_DSM45586","Cfalsenii_DSM44353","Cglutamicum_ATCC13032","Cglycinophilum_AJ3170","Chalotolerans_YIM70093","Chumireducens_DSM45392","Cimitans_DSM44264","Cjeikeium_K41","Ckutscheri_DSM20755","Clactis_RW25","Cmarinu…	0.126944	0.126944	1.52337	0.126944	0.126944	1.52337	2306	0
ERS451417_00907	1717.62.peg.913	NA	NA	NA	1	20	Cargentoratense_DSM44202,"Cbelfantii_FRC0043","Ccallunae_DSM20147","Cdeserti_GIMN1010","Cdiphtheriae_NCTC11397","Cefficiens_YS314","Cepidermidicanis_DSM45586","Cglutamicum_ATCC13032","Chalotolerans_YIM70093","Chumireducens_DSM45392","Cmarinum_DSM44953","Cmaris_DSM45190","Cpseudotuberculosis_31","Cpseudotuberculosis_ATCC19410","Crouxii_FRC0190","Csilvaticum_KL0182","Ctestudinoris_DSM44614","Culcer…	0.204194	0.204194	1.93498	0.204194	0.204194	1.93498	3330	0
ERS451417_02235	1717.62.peg.2260	NA	NA	NA	1	17	Caurimucosum_ATCC700975,"Cbelfantii_FRC0043","Ccamporealensis_DSM44610","Cdiphtheriae_NCTC11397","Cfalsenii_DSM44353","Cglycinophilum_AJ3170","Chalotolerans_YIM70093","Cjeikeium_K41","Ckroppenstedtii_DSM44385","Clactis_RW25","Cpseudotuberculosis_31","Cpseudotuberculosis_ATCC19410","Csimulans_PES1","Cterpenotabidum_Y11","Culcerans_NCTC12077","Culcerans_NCTC7910","Curealyticum_DSM7109"	0.162892	0.162892	1.93001	0.162892	0.162892	1.93002	258	0
ERS451417_00460	1717.62.peg.464	NA	NA	NA	1	39	Cargentoratense_DSM44202,"Catypicum_R2070","Caurimucosum_ATCC700975","Cbelfantii_FRC0043","Ccallunae_DSM20147","Ccamporealensis_DSM44610","Cdeserti_GIMN1010","Cdiphtheriae_NCTC11397","Cdoosanense_DSM45436","Cefficiens_YS314","Cepidermidicanis_DSM45586","Cfalsenii_DSM44353","Cglutamicum_ATCC13032","Cglycinophilum_AJ3170","Chalotolerans_YIM70093","Chumireducens_DSM45392","Cimitans_DSM44264","Cjeike…	0.0963654	0.0963654	1.78675	0.0963654	0.0963654	1.78676	1282	0
ERS451417_02233	1717.62.peg.2258	NA	NA	NA	1	38	Cargentoratense_DSM44202,"Catypicum_R2070","Caurimucosum_ATCC700975","Cbelfantii_FRC0043","Ccallunae_DSM20147","Ccamporealensis_DSM44610","Cdeserti_GIMN1010","Cdiphtheriae_NCTC11397","Cdoosanense_DSM45436","Cefficiens_YS314","Cepidermidicanis_DSM45586","Cfalsenii_DSM44353","Cglutamicum_ATCC13032","Cglycinophilum_AJ3170","Chalotolerans_YIM70093","Chumireducens_DSM45392","Cimitans_DSM44264","Cjeike…	0.157401	0.157401	1.6488	0.157401	0.157401	1.6488	1282	0
ERS451417_01232	1717.62.peg.1240	NA	NA	NA	1	15	Cargentoratense_DSM44202,"Cbelfantii_FRC0043","Cdiphtheriae_NCTC11397","Cepidermidicanis_DSM45586","Ckroppenstedtii_DSM44385","Ckutscheri_DSM20755","Clactis_RW25","Cmustelae_DSM45274","Cpseudotuberculosis_31","Cpseudotuberculosis_ATCC19410","Crouxii_FRC0190","Csilvaticum_KL0182","Culcerans_NCTC12077","Culcerans_NCTC7910","Cvitaeruminis_DSM20294"	0.226714	0.226714	2.17415	0.226714	0.226714	2.17416	258	0
ERS451417_00847	1717.62.peg.852	NA	NA	NA	1	36	Cargentoratense_DSM44202,"Catypicum_R2070","Caurimucosum_ATCC700975","Cbelfantii_FRC0043","Ccallunae_DSM20147","Ccamporealensis_DSM44610","Cdeserti_GIMN1010","Cdiphtheriae_NCTC11397","Cdoosanense_DSM45436","Cefficiens_YS314","Cepidermidicanis_DSM45586","Cfalsenii_DSM44353","Cglutamicum_ATCC13032","Cglycinophilum_AJ3170","Chalotolerans_YIM70093","Chumireducens_DSM45392","Cimitans_DSM44264","Cjeike…	0.116338	0.116338	1.74858	0.116338	0.116338	1.74858	1282	0
ERS451417_02002	1717.62.peg.2006	NA	NA	NA	1	6	Cbelfantii_FRC0043,"Cdiphtheriae_NCTC11397","Cpseudotuberculosis_ATCC19410","Csilvaticum_KL0182","Culcerans_NCTC12077","Culcerans_NCTC7910"	0.142799	0.0971785	4.72175	0.142799	0.0971785	4.72175	4098	1	1. 0.51002;2. 18;3. 52;4. 18;5. 18;6. 52;7. 18;8. 52;9. 52;10. A;11. GCA
ERS451417_01351	1717.62.peg.1359	NA	NA	NA	1	38	Cargentoratense_DSM44202,"Catypicum_R2070","Caurimucosum_ATCC700975","Cbelfantii_FRC0043","Ccallunae_DSM20147","Ccamporealensis_DSM44610","Cdeserti_GIMN1010","Cdiphtheriae_NCTC11397","Cdoosanense_DSM45436","Cefficiens_YS314","Cepidermidicanis_DSM45586","Cfalsenii_DSM44353","Cglutamicum_ATCC13032","Cglycinophilum_AJ3170","Chalotolerans_YIM70093","Chumireducens_DSM45392","Cimitans_DSM44264","Cjeike…	0.496471	0.139634	1.55488	0.139832	0.139832	1.555	1282	0
ERS451417_01806	1717.62.peg.1812	NA	NA	NA	1	9	Caurimucosum_ATCC700975,"Cbelfantii_FRC0043","Cdiphtheriae_NCTC11397","Cpseudotuberculosis_31","Cpseudotuberculosis_ATCC19410","Csilvaticum_KL0182","Culcerans_NCTC12077","Culcerans_NCTC7910","Cvitaeruminis_DSM20294"	0.355328	0.260843	2.78308	0.355328	0.260843	2.78308	2050	2	1. 0.63912;2. 513;3. 1537;4. 757;5. 585;6. 1753;7. 687;8. 2059;9. 1150;10. I;11. ATC	1. 0.71178;2. 585;3. 1753;4. 835;5. 657;6. 1969;7. 759;8. 2275;9. 1366;10. I;11. ATC
ERS451417_00371	1717.62.peg.370	NA	NA	NA	1	39	Cargentoratense_DSM44202,"Catypicum_R2070","Caurimucosum_ATCC700975","Cbelfantii_FRC0043","Ccallunae_DSM20147","Ccamporealensis_DSM44610","Cdeserti_GIMN1010","Cdiphtheriae_NCTC11397","Cdoosanense_DSM45436","Cefficiens_YS314","Cepidermidicanis_DSM45586","Cfalsenii_DSM44353","Cglutamicum_ATCC13032","Cglycinophilum_AJ3170","Chalotolerans_YIM70093","Chumireducens_DSM45392","Cimitans_DSM44264","Cjeike…	0.106818	0.106818	1.86334	0.106818	0.106818	1.86334	2050	1	1. 0.68296;2. 1194;3. 3580;4. 1229;5. 1229;6. 3685;7. 1299;8. 3895;9. 2677;10. S;11. TCC
ERS451417_00139	1717.62.peg.138	NA	NA	NA	1	9	Cbelfantii_FRC0043,"Cdiphtheriae_NCTC11397","Cpseudotuberculosis_31","Cpseudotuberculosis_ATCC19410","Crouxii_FRC0190","Csilvaticum_KL0182","Culcerans_NCTC12077","Culcerans_NCTC7910","Cvitaeruminis_DSM20294"	1	0.0884846	2.62504	1	0.0884846	2.62505	2048	1	1. 0.91422;2. 219;3. 655;4. 248;5. 234;6. 700;7. 255;8. 763;9. 340;10. K;11. AAG
ERS451417_01514	1717.62.peg.1522	NA	NA	NA	1	14	Cargentoratense_DSM44202,"Cbelfantii_FRC0043","Cdiphtheriae_NCTC11397","Cepidermidicanis_DSM45586","Ckroppenstedtii_DSM44385","Ckutscheri_DSM20755","Clactis_RW25","Cmustelae_DSM45274","Cpseudotuberculosis_31","Cpseudotuberculosis_ATCC19410","Csilvaticum_KL0182","Culcerans_NCTC12077","Culcerans_NCTC7910","Cvitaeruminis_DSM20294"	0.443604	0.0946845	1.84423	0.443604	0.0946842	1.84423	2	1	1. 0.88417;2. 151;3. 451;4. 165;5. 165;6. 493;7. 165;8. 493;9. 424;10. N;11. AAC
ERS451417_01255	1717.62.peg.1263	NA	NA	NA	1	29	Cargentoratense_DSM44202,"Catypicum_R2070","Caurimucosum_ATCC700975","Cbelfantii_FRC0043","Ccamporealensis_DSM44610","Cdiphtheriae_NCTC11397","Cdoosanense_DSM45436","Cepidermidicanis_DSM45586","Chumireducens_DSM45392","Cimitans_DSM44264","Ckroppenstedtii_DSM44385","Ckutscheri_DSM20755","Clactis_RW25","Cmarinum_DSM44953","Cmaris_DSM45190","Cmustelae_DSM45274","Cpseudotuberculosis_31","Cpseudotuber…	0.191377	0.191377	1.82543	0.191377	0.191377	1.82544	258	0
ERS451417_01450	1717.62.peg.1457	NA	NA	NA	1	33	Cargentoratense_DSM44202,"Catypicum_R2070","Caurimucosum_ATCC700975","Cbelfantii_FRC0043","Ccallunae_DSM20147","Ccamporealensis_DSM44610","Cdeserti_GIMN1010","Cdiphtheriae_NCTC11397","Cdoosanense_DSM45436","Cefficiens_YS314","Cepidermidicanis_DSM45586","Cglutamicum_ATCC13032","Cglycinophilum_AJ3170","Chalotolerans_YIM70093","Chumireducens_DSM45392","Cimitans_DSM44264","Ckroppenstedtii_DSM44385","…	0.192274	0.18461	2.02346	0.192274	0.18461	2.02346	2	1	1. 0.65553;2. 310;3. 928;4. 373;5. 357;6. 1069;7. 412;8. 1234;9. 673;10. A;11. GCG
ERS451417_00449	1717.62.peg.452	NA	NA	NA	1	17	Cbelfantii_FRC0043,"Ccallunae_DSM20147","Ccamporealensis_DSM44610","Cdeserti_GIMN1010","Cdiphtheriae_NCTC11397","Cepidermidicanis_DSM45586","Cglutamicum_ATCC13032","Ckutscheri_DSM20755","Cmustelae_DSM45274","Cpseudotuberculosis_31","Cpseudotuberculosis_ATCC19410","Crouxii_FRC0190","Csilvaticum_KL0182","Ctestudinoris_DSM44614","Culcerans_NCTC12077","Culcerans_NCTC7910","Cuterequi_DSM45634"	0.075994	0.075994	2.07353	0.075994	0.075994	2.07354	258	0
ERS451417_01866	1717.62.peg.1868	NA	NA	NA	1	31	Cargentoratense_DSM44202,"Caurimucosum_ATCC700975","Cbelfantii_FRC0043","Ccallunae_DSM20147","Ccamporealensis_DSM44610","Cdeserti_GIMN1010","Cdiphtheriae_NCTC11397","Cdoosanense_DSM45436","Cefficiens_YS314","Cepidermidicanis_DSM45586","Cfalsenii_DSM44353","Cglutamicum_ATCC13032","Cglycinophilum_AJ3170","Chalotolerans_YIM70093","Chumireducens_DSM45392","Cjeikeium_K41","Ckroppenstedtii_DSM44385","C…	0.177294	0.177294	1.47205	0.177294	0.177294	1.47206	4354	0
ERS451417_01808	1717.62.peg.1814	NA	NA	NA	1	38	Cargentoratense_DSM44202,"Catypicum_R2070","Caurimucosum_ATCC700975","Cbelfantii_FRC0043","Ccallunae_DSM20147","Ccamporealensis_DSM44610","Cdeserti_GIMN1010","Cdiphtheriae_NCTC11397","Cdoosanense_DSM45436","Cefficiens_YS314","Cepidermidicanis_DSM45586","Cfalsenii_DSM44353","Cglutamicum_ATCC13032","Cglycinophilum_AJ3170","Chalotolerans_YIM70093","Chumireducens_DSM45392","Cimitans_DSM44264","Cjeike…	0.0414766	0.0414766	1.52519	0.0414766	0.0414766	1.52517	3330	0
ERS451417_01158	1717.62.peg.1169	NA	NA	NA	1	39	Cargentoratense_DSM44202,"Catypicum_R2070","Caurimucosum_ATCC700975","Cbelfantii_FRC0043","Ccallunae_DSM20147","Ccamporealensis_DSM44610","Cdeserti_GIMN1010","Cdiphtheriae_NCTC11397","Cdoosanense_DSM45436","Cefficiens_YS314","Cepidermidicanis_DSM45586","Cfalsenii_DSM44353","Cglutamicum_ATCC13032","Cglycinophilum_AJ3170","Chalotolerans_YIM70093","Chumireducens_DSM45392","Cimitans_DSM44264","Cjeike…	0.151354	0.151354	1.74644	0.151354	0.151354	1.74644	258	0
ERS451417_00575	1717.62.peg.578	NA	NA	NA	1	39	Cargentoratense_DSM44202,"Catypicum_R2070","Caurimucosum_ATCC700975","Cbelfantii_FRC0043","Ccallunae_DSM20147","Ccamporealensis_DSM44610","Cdeserti_GIMN1010","Cdiphtheriae_NCTC11397","Cdoosanense_DSM45436","Cefficiens_YS314","Cepidermidicanis_DSM45586","Cfalsenii_DSM44353","Cglutamicum_ATCC13032","Cglycinophilum_AJ3170","Chalotolerans_YIM70093","Chumireducens_DSM45392","Cimitans_DSM44264","Cjeike…	0.126743	0.126743	2.27787	0.126743	0.126743	2.27788	258	0
ERS451417_01581	1717.62.peg.1590	NA	NA	NA	1	29	Catypicum_R2070,"Caurimucosum_ATCC700975","Cbelfantii_FRC0043","Ccallunae_DSM20147","Ccamporealensis_DSM44610","Cdeserti_GIMN1010","Cdiphtheriae_NCTC11397","Cdoosanense_DSM45436","Cefficiens_YS314","Cepidermidicanis_DSM45586","Cglutamicum_ATCC13032","Chalotolerans_YIM70093","Chumireducens_DSM45392","Ckutscheri_DSM20755","Cmarinum_DSM44953","Cmaris_DSM45190","Cmustelae_DSM45274","Cpseudotuberculos…	0.223501	0.223501	1.63239	0.223501	0.223501	1.63239	3330	0
ERS451417_02023	1717.62.peg.2028	NA	NA	NA	1	33	Caurimucosum_ATCC700975,"Cbelfantii_FRC0043","Ccallunae_DSM20147","Ccamporealensis_DSM44610","Cdeserti_GIMN1010","Cdiphtheriae_NCTC11397","Cdoosanense_DSM45436","Cefficiens_YS314","Cepidermidicanis_DSM45586","Cglutamicum_ATCC13032","Cglycinophilum_AJ3170","Chalotolerans_YIM70093","Chumireducens_DSM45392","Cimitans_DSM44264","Cjeikeium_K41","Ckroppenstedtii_DSM44385","Ckutscheri_DSM20755","Clactis…	0.328936	0.328936	1.75808	0.328937	0.328937	1.75808	3330	0
ERS451417_00980	1717.62.peg.990	NA	NA	NA	1	35	Cargentoratense_DSM44202,"Catypicum_R2070","Caurimucosum_ATCC700975","Cbelfantii_FRC0043","Ccallunae_DSM20147","Ccamporealensis_DSM44610","Cdeserti_GIMN1010","Cdiphtheriae_NCTC11397","Cdoosanense_DSM45436","Cefficiens_YS314","Cepidermidicanis_DSM45586","Cfalsenii_DSM44353","Cglutamicum_ATCC13032","Cglycinophilum_AJ3170","Chalotolerans_YIM70093","Chumireducens_DSM45392","Cjeikeium_K41","Ckroppenst…	0.156758	0.156758	1.63846	0.156758	0.156758	1.63846	6146	2	1. 0.42754;2. 71;3. 211;4. 80;5. 76;6. 226;7. 90;8. 268;9. 64;10. V;11. GTT	1. 0.54049;2. 259;3. 775;4. 275;5. 267;6. 799;7. 282;8. 844;9. 550;10. I;11. ATC
ERS451417_00414	1717.62.peg.414	NA	NA	NA	1	11	Catypicum_R2070,"Cbelfantii_FRC0043","Cdiphtheriae_NCTC11397","Cepidermidicanis_DSM45586","Ckutscheri_DSM20755","Cpseudotuberculosis_31","Cpseudotuberculosis_ATCC19410","Crouxii_FRC0190","Csilvaticum_KL0182","Culcerans_NCTC12077","Culcerans_NCTC7910"	0.153926	0.120316	2.34192	0.153926	0.120316	2.34193	2	1	1. 0.68155;2. 336;3. 1006;4. 376;5. 359;6. 1075;7. 383;8. 1147;9. 835;10. T;11. ACA
ERS451417_01236	1717.62.peg.1244	NA	NA	NA	1	13	Cbelfantii_FRC0043,"Cdiphtheriae_NCTC11397","Cepidermidicanis_DSM45586","Ckroppenstedtii_DSM44385","Ckutscheri_DSM20755","Cmustelae_DSM45274","Cpseudotuberculosis_31","Cpseudotuberculosis_ATCC19410","Crouxii_FRC0190","Csilvaticum_KL0182","Culcerans_NCTC12077","Culcerans_NCTC7910","Cvitaeruminis_DSM20294"	0.212243	0.212243	1.72785	0.212243	0.212243	1.72785	2306	0
ERS451417_01397	1717.62.peg.1410	NA	NA	NA	1	7	Cbelfantii_FRC0043,"Cdiphtheriae_NCTC11397","Cpseudotuberculosis_31","Cpseudotuberculosis_ATCC19410","Csilvaticum_KL0182","Culcerans_NCTC12077","Culcerans_NCTC7910"	0.26253	0.26253	3.2528	0.26253	0.26253	3.2528	2050	1	1. 0.4428;2. 37;3. 109;4. 50;5. 45;6. 133;7. 55;8. 163;9. 1;10. Y;11. TAT
ERS451417_00387	1717.62.peg.387	NA	NA	NA	1	11	Cbelfantii_FRC0043,"Cdiphtheriae_NCTC11397","Cepidermidicanis_DSM45586","Cmarinum_DSM44953","Cpseudotuberculosis_31","Cpseudotuberculosis_ATCC19410","Crouxii_FRC0190","Csilvaticum_KL0182","Ctestudinoris_DSM44614","Culcerans_NCTC12077","Culcerans_NCTC7910"	0.442119	0.281025	1.7359	0.442119	0.281025	1.7359	1026	2	1. 0.80417;2. 125;3. 373;4. 235;5. 168;6. 502;7. 175;8. 523;9. 349;10. I;11. ATC	1. 0.70023;2. 126;3. 376;4. 236;5. 169;6. 505;7. 176;8. 526;9. 352;10. E;11. GAG
ERS451417_01459	1717.62.peg.1469	NA	NA	NA	1	30	Caurimucosum_ATCC700975,"Ccallunae_DSM20147","Ccamporealensis_DSM44610","Cdeserti_GIMN1010","Cdiphtheriae_NCTC11397","Cdoosanense_DSM45436","Cefficiens_YS314","Cepidermidicanis_DSM45586","Cfalsenii_DSM44353","Cglutamicum_ATCC13032","Cglycinophilum_AJ3170","Chalotolerans_YIM70093","Chumireducens_DSM45392","Cimitans_DSM44264","Ckroppenstedtii_DSM44385","Ckutscheri_DSM20755","Clactis_RW25","Cmarinum…	0.1731	0.1731	1.78302	0.1731	0.1731	1.78302	4098	1	1. 0.51265;2. 327;3. 979;4. 350;5. 328;6. 982;7. 328;8. 982;9. 967;10. Q;11. CAA
ERS451417_01869	1717.62.peg.1871	NA	NA	NA	1	38	Cargentoratense_DSM44202,"Catypicum_R2070","Caurimucosum_ATCC700975","Cbelfantii_FRC0043","Ccallunae_DSM20147","Ccamporealensis_DSM44610","Cdeserti_GIMN1010","Cdiphtheriae_NCTC11397","Cdoosanense_DSM45436","Cefficiens_YS314","Cepidermidicanis_DSM45586","Cfalsenii_DSM44353","Cglutamicum_ATCC13032","Cglycinophilum_AJ3170","Chalotolerans_YIM70093","Chumireducens_DSM45392","Cimitans_DSM44264","Cjeike…	0.152881	0.152881	1.34424	0.152881	0.152881	1.34424	2306	0
ERS451417_02000	1717.62.peg.2004	NA	NA	NA	1	7	Cbelfantii_FRC0043,"Cdiphtheriae_NCTC11397","Cpseudotuberculosis_31","Cpseudotuberculosis_ATCC19410","Csilvaticum_KL0182","Culcerans_NCTC12077","Culcerans_NCTC7910"	0.212752	0.193502	3.76921	0.212752	0.193502	3.76921	2	1	1. 0.60136;2. 289;3. 865;4. 289;5. 289;6. 865;7. 289;8. 865;9. 865;10. A;11. GCC
ERS451417_01736	1717.62.peg.1740	NA	NA	NA	1	38	Cargentoratense_DSM44202,"Catypicum_R2070","Caurimucosum_ATCC700975","Cbelfantii_FRC0043","Ccallunae_DSM20147","Ccamporealensis_DSM44610","Cdeserti_GIMN1010","Cdiphtheriae_NCTC11397","Cdoosanense_DSM45436","Cefficiens_YS314","Cepidermidicanis_DSM45586","Cfalsenii_DSM44353","Cglutamicum_ATCC13032","Cglycinophilum_AJ3170","Chalotolerans_YIM70093","Chumireducens_DSM45392","Cimitans_DSM44264","Cjeike…	0.184723	0.184723	1.78793	0.184723	0.184723	1.78793	2306	0
ERS451417_00398	1717.62.peg.398	NA	NA	NA	1	39	Cargentoratense_DSM44202,"Catypicum_R2070","Caurimucosum_ATCC700975","Cbelfantii_FRC0043","Ccallunae_DSM20147","Ccamporealensis_DSM44610","Cdeserti_GIMN1010","Cdiphtheriae_NCTC11397","Cdoosanense_DSM45436","Cefficiens_YS314","Cepidermidicanis_DSM45586","Cfalsenii_DSM44353","Cglutamicum_ATCC13032","Cglycinophilum_AJ3170","Chalotolerans_YIM70093","Chumireducens_DSM45392","Cimitans_DSM44264","Cjeike…	0.380687	0.131688	1.67139	0.24814	0.131678	1.67139	258	0
ERS451417_01681	1717.62.peg.1688	NA	NA	NA	1	38	Cargentoratense_DSM44202,"Catypicum_R2070","Caurimucosum_ATCC700975","Cbelfantii_FRC0043","Ccallunae_DSM20147","Ccamporealensis_DSM44610","Cdeserti_GIMN1010","Cdiphtheriae_NCTC11397","Cdoosanense_DSM45436","Cefficiens_YS314","Cepidermidicanis_DSM45586","Cfalsenii_DSM44353","Cglutamicum_ATCC13032","Cglycinophilum_AJ3170","Chalotolerans_YIM70093","Chumireducens_DSM45392","Cimitans_DSM44264","Cjeike…	0.120062	0.120062	1.57266	0.120062	0.120062	1.57268	3330	0
ERS451417_01505	1717.62.peg.1513	NA	NA	NA	1	26	Cargentoratense_DSM44202,"Caurimucosum_ATCC700975","Cbelfantii_FRC0043","Ccallunae_DSM20147","Ccamporealensis_DSM44610","Cdeserti_GIMN1010","Cdiphtheriae_NCTC11397","Cdoosanense_DSM45436","Cefficiens_YS314","Cepidermidicanis_DSM45586","Cglutamicum_ATCC13032","Chalotolerans_YIM70093","Chumireducens_DSM45392","Cimitans_DSM44264","Ckutscheri_DSM20755","Cmarinum_DSM44953","Cmaris_DSM45190","Cmustelae…	0.425415	0.381966	1.4883	0.425415	0.381966	1.4883	7170	1	1. 0.48876;2. 88;3. 262;4. 106;5. 102;6. 304;7. 105;8. 313;9. 262;10. L;11. TTA
ERS451417_01256	1717.62.peg.1264	NA	NA	NA	1	38	Cargentoratense_DSM44202,"Catypicum_R2070","Caurimucosum_ATCC700975","Cbelfantii_FRC0043","Ccallunae_DSM20147","Ccamporealensis_DSM44610","Cdeserti_GIMN1010","Cdiphtheriae_NCTC11397","Cdoosanense_DSM45436","Cefficiens_YS314","Cepidermidicanis_DSM45586","Cfalsenii_DSM44353","Cglutamicum_ATCC13032","Cglycinophilum_AJ3170","Chalotolerans_YIM70093","Chumireducens_DSM45392","Cimitans_DSM44264","Cjeike…	0.650187	0.243822	1.73847	0.379698	0.243822	1.73847	258	0
ERS451417_00984	1717.62.peg.995	NA	NA	NA	1	7	Cbelfantii_FRC0043,"Cdiphtheriae_NCTC11397","Cpseudotuberculosis_31","Cpseudotuberculosis_ATCC19410","Crouxii_FRC0190","Culcerans_NCTC12077","Culcerans_NCTC7910"	0.340255	0.307089	3.37342	0.340255	0.307089	3.37342	2	1	1. 0.73702;2. 187;3. 559;4. 215;5. 188;6. 562;7. 187;8. 559;9. 523;10. I;11. ATT
ERS451417_00077	1717.62.peg.74	NA	NA	NA	1	35	Cargentoratense_DSM44202,"Caurimucosum_ATCC700975","Cbelfantii_FRC0043","Ccallunae_DSM20147","Cdeserti_GIMN1010","Cdiphtheriae_NCTC11397","Cdoosanense_DSM45436","Cefficiens_YS314","Cepidermidicanis_DSM45586","Cfalsenii_DSM44353","Cglutamicum_ATCC13032","Cglycinophilum_AJ3170","Chalotolerans_YIM70093","Chumireducens_DSM45392","Cimitans_DSM44264","Cjeikeium_K41","Ckroppenstedtii_DSM44385","Ckutsche…	0.121519	0.121519	1.94987	0.121519	0.121519	1.94987	258	0
ERS451417_00212	1717.62.peg.209	NA	NA	NA	1	11	Cbelfantii_FRC0043,"Cdiphtheriae_NCTC11397","Ckroppenstedtii_DSM44385","Clactis_RW25","Cmustelae_DSM45274","Cpseudotuberculosis_31","Cpseudotuberculosis_ATCC19410","Crouxii_FRC0190","Csilvaticum_KL0182","Culcerans_NCTC12077","Culcerans_NCTC7910"	0.0428012	0.0428012	2.39381	0.0428012	0.0428012	2.39382	258	0
ERS451417_00951	1717.62.peg.958	NA	NA	NA	1	39	Cargentoratense_DSM44202,"Catypicum_R2070","Caurimucosum_ATCC700975","Cbelfantii_FRC0043","Ccallunae_DSM20147","Ccamporealensis_DSM44610","Cdeserti_GIMN1010","Cdiphtheriae_NCTC11397","Cdoosanense_DSM45436","Cefficiens_YS314","Cepidermidicanis_DSM45586","Cfalsenii_DSM44353","Cglutamicum_ATCC13032","Cglycinophilum_AJ3170","Chalotolerans_YIM70093","Chumireducens_DSM45392","Cimitans_DSM44264","Cjeike…	0.104202	0.104202	1.59654	0.104202	0.104202	1.59654	258	0
ERS451417_00578	1717.62.peg.581	NA	NA	NA	1	34	Cargentoratense_DSM44202,"Catypicum_R2070","Caurimucosum_ATCC700975","Cbelfantii_FRC0043","Ccallunae_DSM20147","Ccamporealensis_DSM44610","Cdeserti_GIMN1010","Cdiphtheriae_NCTC11397","Cdoosanense_DSM45436","Cefficiens_YS314","Cepidermidicanis_DSM45586","Cglutamicum_ATCC13032","Chalotolerans_YIM70093","Chumireducens_DSM45392","Cimitans_DSM44264","Ckroppenstedtii_DSM44385","Ckutscheri_DSM20755","Cl…	0.187414	0.1619	1.98703	0.187414	0.1619	1.98703	2	1	1. 0.66681;2. 271;3. 811;4. 293;5. 293;6. 877;7. 318;8. 952;9. 691;10. T;11. ACC
ERS451417_00680	1717.62.peg.687	NA	NA	NA	1	39	Cargentoratense_DSM44202,"Catypicum_R2070","Caurimucosum_ATCC700975","Cbelfantii_FRC0043","Ccallunae_DSM20147","Ccamporealensis_DSM44610","Cdeserti_GIMN1010","Cdiphtheriae_NCTC11397","Cdoosanense_DSM45436","Cefficiens_YS314","Cepidermidicanis_DSM45586","Cfalsenii_DSM44353","Cglutamicum_ATCC13032","Cglycinophilum_AJ3170","Chalotolerans_YIM70093","Chumireducens_DSM45392","Cimitans_DSM44264","Cjeike…	0.0691822	0.0596073	1.62965	0.0597715	0.0595976	1.62964	2306	0
ERS451417_00124	1717.62.peg.122	NA	NA	NA	1	14	Cbelfantii_FRC0043,"Ccallunae_DSM20147","Cdiphtheriae_NCTC11397","Cdoosanense_DSM45436","Cefficiens_YS314","Ckroppenstedtii_DSM44385","Ckutscheri_DSM20755","Cpseudotuberculosis_31","Cpseudotuberculosis_ATCC19410","Crouxii_FRC0190","Csilvaticum_KL0182","Culcerans_NCTC12077","Culcerans_NCTC7910","Cvitaeruminis_DSM20294"	0.141794	0.141794	2.17844	0.141794	0.141794	2.17843	3330	0
ERS451417_00975	1717.62.peg.985	NA	NA	NA	1	36	Cargentoratense_DSM44202,"Catypicum_R2070","Caurimucosum_ATCC700975","Cbelfantii_FRC0043","Ccallunae_DSM20147","Ccamporealensis_DSM44610","Cdeserti_GIMN1010","Cdiphtheriae_NCTC11397","Cdoosanense_DSM45436","Cefficiens_YS314","Cepidermidicanis_DSM45586","Cfalsenii_DSM44353","Cglutamicum_ATCC13032","Chalotolerans_YIM70093","Chumireducens_DSM45392","Cimitans_DSM44264","Cjeikeium_K41","Ckroppenstedti…	0.20581	0.20581	1.70547	0.20581	0.20581	1.70547	2306	0
ERS451417_02258	1717.62.peg.2287	NA	NA	NA	1	14	Caurimucosum_ATCC700975,"Cbelfantii_FRC0043","Ccamporealensis_DSM44610","Cdiphtheriae_NCTC11397","Ckroppenstedtii_DSM44385","Clactis_RW25","Cpseudotuberculosis_31","Cpseudotuberculosis_ATCC19410","Csilvaticum_KL0182","Csimulans_PES1","Csingulare_IBSB52218","Culcerans_NCTC12077","Culcerans_NCTC7910","Cuterequi_DSM45634"	0.501622	0.127165	1.94667	0.501622	0.127165	1.94667	2	1	1. 0.91958;2. 59;3. 175;4. 69;5. 62;6. 184;7. 62;8. 184;9. 172;10. S;11. AGC
ERS451417_01521	1717.62.peg.1530	NA	NA	NA	1	38	Cargentoratense_DSM44202,"Catypicum_R2070","Caurimucosum_ATCC700975","Cbelfantii_FRC0043","Ccallunae_DSM20147","Ccamporealensis_DSM44610","Cdeserti_GIMN1010","Cdiphtheriae_NCTC11397","Cdoosanense_DSM45436","Cefficiens_YS314","Cepidermidicanis_DSM45586","Cfalsenii_DSM44353","Cglutamicum_ATCC13032","Cglycinophilum_AJ3170","Chalotolerans_YIM70093","Chumireducens_DSM45392","Cimitans_DSM44264","Cjeike…	0.323239	0.102731	1.55553	0.212064	0.102721	1.55554	258	0
ERS451417_00966	1717.62.peg.974	NA	NA	NA	1	17	Cargentoratense_DSM44202,"Cbelfantii_FRC0043","Cdiphtheriae_NCTC11397","Cefficiens_YS314","Cepidermidicanis_DSM45586","Cglutamicum_ATCC13032","Ckroppenstedtii_DSM44385","Ckutscheri_DSM20755","Clactis_RW25","Cmustelae_DSM45274","Cpseudotuberculosis_31","Cpseudotuberculosis_ATCC19410","Crouxii_FRC0190","Csilvaticum_KL0182","Culcerans_NCTC12077","Culcerans_NCTC7910","Cvitaeruminis_DSM20294"	0.171036	0.171036	2.51283	0.171036	0.171036	2.51283	258	0
ERS451417_01160	1717.62.peg.1171	NA	NA	NA	1	37	Cargentoratense_DSM44202,"Caurimucosum_ATCC700975","Cbelfantii_FRC0043","Ccallunae_DSM20147","Ccamporealensis_DSM44610","Cdeserti_GIMN1010","Cdiphtheriae_NCTC11397","Cdoosanense_DSM45436","Cefficiens_YS314","Cepidermidicanis_DSM45586","Cfalsenii_DSM44353","Cglutamicum_ATCC13032","Cglycinophilum_AJ3170","Chalotolerans_YIM70093","Chumireducens_DSM45392","Cimitans_DSM44264","Cjeikeium_K41","Ckroppen…	0.186392	0.186392	1.64759	0.186392	0.186392	1.64759	3330	0
ERS451417_01638	1717.62.peg.1645	NA	NA	NA	1	26	Cargentoratense_DSM44202,"Catypicum_R2070","Caurimucosum_ATCC700975","Cbelfantii_FRC0043","Ccallunae_DSM20147","Ccamporealensis_DSM44610","Cdeserti_GIMN1010","Cdiphtheriae_NCTC11397","Cdoosanense_DSM45436","Cefficiens_YS314","Cepidermidicanis_DSM45586","Cglutamicum_ATCC13032","Chalotolerans_YIM70093","Cimitans_DSM44264","Ckutscheri_DSM20755","Cmustelae_DSM45274","Cpseudotuberculosis_31","Cpseudot…	0.162821	0.12864	1.67665	0.162821	0.12864	1.67665	3074	1	1. 0.71984;2. 27;3. 79;4. 52;5. 38;6. 112;7. 58;8. 172;9. 10;10. I;11. ATT
ERS451417_01148	1717.62.peg.1159	NA	NA	NA	1	38	Cargentoratense_DSM44202,"Catypicum_R2070","Caurimucosum_ATCC700975","Cbelfantii_FRC0043","Ccallunae_DSM20147","Ccamporealensis_DSM44610","Cdeserti_GIMN1010","Cdiphtheriae_NCTC11397","Cdoosanense_DSM45436","Cefficiens_YS314","Cepidermidicanis_DSM45586","Cfalsenii_DSM44353","Cglutamicum_ATCC13032","Cglycinophilum_AJ3170","Chalotolerans_YIM70093","Chumireducens_DSM45392","Cimitans_DSM44264","Ckropp…	0.696008	0.161262	1.67709	0.696027	0.161272	1.67709	2	1	1. 0.9183;2. 39;3. 115;4. 70;5. 70;6. 208;7. 83;8. 247;9. 106;10. C;11. TGT
ERS451417_01264	1717.62.peg.1272	NA	NA	NA	1	39	Cargentoratense_DSM44202,"Catypicum_R2070","Caurimucosum_ATCC700975","Cbelfantii_FRC0043","Ccallunae_DSM20147","Ccamporealensis_DSM44610","Cdeserti_GIMN1010","Cdiphtheriae_NCTC11397","Cdoosanense_DSM45436","Cefficiens_YS314","Cepidermidicanis_DSM45586","Cfalsenii_DSM44353","Cglutamicum_ATCC13032","Cglycinophilum_AJ3170","Chalotolerans_YIM70093","Chumireducens_DSM45392","Cimitans_DSM44264","Cjeike…	0.257484	0.257484	1.61868	0.257484	0.257484	1.61867	258	0
ERS451417_00902	1717.62.peg.908	NA	NA	NA	1	32	Cargentoratense_DSM44202,"Catypicum_R2070","Cbelfantii_FRC0043","Ccallunae_DSM20147","Cdeserti_GIMN1010","Cdiphtheriae_NCTC11397","Cdoosanense_DSM45436","Cefficiens_YS314","Cepidermidicanis_DSM45586","Cfalsenii_DSM44353","Cglutamicum_ATCC13032","Cglycinophilum_AJ3170","Chalotolerans_YIM70093","Chumireducens_DSM45392","Cjeikeium_K41","Ckroppenstedtii_DSM44385","Ckutscheri_DSM20755","Clactis_RW25",…	0.0964438	0.0964438	1.849	0.0964438	0.0964438	1.849	258	0
ERS451417_01353	1717.62.peg.1361	NA	NA	NA	1	38	Cargentoratense_DSM44202,"Catypicum_R2070","Caurimucosum_ATCC700975","Cbelfantii_FRC0043","Ccallunae_DSM20147","Ccamporealensis_DSM44610","Cdeserti_GIMN1010","Cdiphtheriae_NCTC11397","Cdoosanense_DSM45436","Cefficiens_YS314","Cepidermidicanis_DSM45586","Cfalsenii_DSM44353","Cglutamicum_ATCC13032","Cglycinophilum_AJ3170","Chalotolerans_YIM70093","Chumireducens_DSM45392","Cimitans_DSM44264","Cjeike…	0.308454	0.12778	1.8971	0.308454	0.12778	1.8971	2	1	1. 0.87643;2. 212;3. 634;4. 219;5. 219;6. 655;7. 224;8. 670;9. 541;10. R;11. CGC
ERS451417_00570	1717.62.peg.573	NA	NA	NA	1	7	Cbelfantii_FRC0043,"Cdiphtheriae_NCTC11397","Cpseudotuberculosis_31","Cpseudotuberculosis_ATCC19410","Crouxii_FRC0190","Csilvaticum_KL0182","Culcerans_NCTC7910"	18.2959	0.236778	2.59062	0.80088	0.23677	2.59061	256	0
ERS451417_01802	1717.62.peg.1808	NA	NA	NA	1	38	Cargentoratense_DSM44202,"Catypicum_R2070","Caurimucosum_ATCC700975","Cbelfantii_FRC0043","Ccallunae_DSM20147","Ccamporealensis_DSM44610","Cdeserti_GIMN1010","Cdiphtheriae_NCTC11397","Cdoosanense_DSM45436","Cefficiens_YS314","Cepidermidicanis_DSM45586","Cfalsenii_DSM44353","Cglutamicum_ATCC13032","Cglycinophilum_AJ3170","Chalotolerans_YIM70093","Chumireducens_DSM45392","Cimitans_DSM44264","Cjeike…	0.206416	0.135302	1.80729	0.206425	0.135302	1.80729	2	1	1. 0.84756;2. 714;3. 2140;4. 776;5. 776;6. 2326;7. 925;8. 2773;9. 1837;10. P;11. CCA
ERS451417_00250	1717.62.peg.245	NA	NA	NA	1	8	Cbelfantii_FRC0043,"Cdiphtheriae_NCTC11397","Cpseudotuberculosis_31","Cpseudotuberculosis_ATCC19410","Crouxii_FRC0190","Csilvaticum_KL0182","Culcerans_NCTC12077","Culcerans_NCTC7910"	0.165098	0.165098	5.21487	0.165098	0.165098	5.21488	2306	0
ERS451417_01014	1717.62.peg.1025	NA	NA	NA	1	38	Cargentoratense_DSM44202,"Catypicum_R2070","Caurimucosum_ATCC700975","Cbelfantii_FRC0043","Ccallunae_DSM20147","Ccamporealensis_DSM44610","Cdeserti_GIMN1010","Cdiphtheriae_NCTC11397","Cdoosanense_DSM45436","Cefficiens_YS314","Cepidermidicanis_DSM45586","Cfalsenii_DSM44353","Cglutamicum_ATCC13032","Cglycinophilum_AJ3170","Chalotolerans_YIM70093","Chumireducens_DSM45392","Cimitans_DSM44264","Cjeike…	0.207061	0.207061	1.80388	0.207061	0.207061	1.80388	258	0
ERS451417_00817	1717.62.peg.823	NA	NA	NA	1	35	Cargentoratense_DSM44202,"Catypicum_R2070","Caurimucosum_ATCC700975","Cbelfantii_FRC0043","Ccallunae_DSM20147","Ccamporealensis_DSM44610","Cdeserti_GIMN1010","Cdiphtheriae_NCTC11397","Cdoosanense_DSM45436","Cefficiens_YS314","Cepidermidicanis_DSM45586","Cglutamicum_ATCC13032","Chalotolerans_YIM70093","Chumireducens_DSM45392","Cimitans_DSM44264","Ckroppenstedtii_DSM44385","Ckutscheri_DSM20755","Cl…	0.466028	0.198947	1.55076	0.314488	0.198947	1.55076	3330	0
ERS451417_00252	1717.62.peg.247	NA	NA	NA	1	10	Cargentoratense_DSM44202,"Cbelfantii_FRC0043","Cdiphtheriae_NCTC11397","Ckutscheri_DSM20755","Cmustelae_DSM45274","Cpseudotuberculosis_ATCC19410","Crouxii_FRC0190","Csilvaticum_KL0182","Culcerans_NCTC12077","Culcerans_NCTC7910"	0.0915182	0.0915182	2.29055	0.0915182	0.0915182	2.29055	7170	2	1. 0.49579;2. 71;3. 211;4. 96;5. 85;6. 253;7. 101;8. 301;9. 193;10. F;11. TTT	1. 0.45535;2. 154;3. 460;4. 195;5. 168;6. 502;7. 185;8. 553;9. 412;10. T;11. ACC
ERS451417_01224	1717.62.peg.1232	NA	NA	NA	1	26	Catypicum_R2070,"Cbelfantii_FRC0043","Ccallunae_DSM20147","Cdeserti_GIMN1010","Cdiphtheriae_NCTC11397","Cdoosanense_DSM45436","Cefficiens_YS314","Cepidermidicanis_DSM45586","Cglutamicum_ATCC13032","Chalotolerans_YIM70093","Chumireducens_DSM45392","Cimitans_DSM44264","Ckutscheri_DSM20755","Cmarinum_DSM44953","Cmaris_DSM45190","Cmustelae_DSM45274","Cpseudotuberculosis_ATCC19410","CriegeliiPUDD83A45…	0.228747	0.228747	1.45753	0.228747	0.228747	1.45753	4354	0
ERS451417_01993	1717.62.peg.1994	NA	NA	NA	1	15	Caurimucosum_ATCC700975,"Cbelfantii_FRC0043","Cdiphtheriae_NCTC11397","Cfalsenii_DSM44353","Ckroppenstedtii_DSM44385","Ckutscheri_DSM20755","Clactis_RW25","Cmustelae_DSM45274","Cpseudotuberculosis_31","Cpseudotuberculosis_ATCC19410","Csilvaticum_KL0182","Ctestudinoris_DSM44614","Culcerans_NCTC12077","Cuterequi_DSM45634","Cvitaeruminis_DSM20294"	0.271345	0.172325	2.15499	0.271345	0.172325	2.15499	2050	1	1. 0.75217;2. 56;3. 166;4. 56;5. 56;6. 166;7. 56;8. 166;9. 64;10. L;11. CTC
[truncated: 66 more rows]
[truncated: 9 more columns]
