# Supplementary material for: Evidence of episodic positive selection in Corynebacterium diphtheriae complex of species and its implementations in identification of drug and vaccine targets
Source: PeerJ. 2022 Feb 16;10:e12662. doi: 10.7717/peerj.12662 (PMC8857904; doi:10.7717/peerj.12662)
Supplement: Supplemental Information 9 [file peerj-10-12662-s009.xlsx]

## Sheet: Cr
Gene	Transcript	Bonferroni	FDR	P-Value	P-Value raw	Number of species included	Species included	HA foreground omega	HA background omega	HA kappa	H0 foreground omega	H0 background omega	H0 kappa	Correction code	Number of Sites under positive Selection	Site under positve Selection 1(1. Probability to be under positive selection;2. Position in amino acid sequence of anchor species;3. Position in nucleotide sequence of anchor species;4.Position in main protein alignment:fastp.clustalw.aln;5. Position in protein clustal subalignment: .aln;6. Position in to codon backtranslated clustal subalignment: Codon_aln.fasta; 7. Position in prank alignment (…	Site under positve Selection 2	Site under positve Selection 3	Site under positve Selection 4	Site under positve Selection 5	Site under positve Selection 6	Site under positve Selection 7	Site under positve Selection 8	Site under positve Selection 9	Site under positve Selection 10	Site under positve Selection 11	Site under positve Selection 12	Site under positve Selection 13	Site under positve Selection 14	Site under positve Selection 15	Site under positve Selection 16	Site under positve Selection 17	Site under positve Selection 18	Site under positve Selection 19	Site under positve Selection 20	Site under positve Selection 21	Site under positve Selection 22	Site under positve Selection 23
ERS451417_00470	1717.62.peg.474	0.013896	0.013896	0.001737	0.001737	8	Cbelfantii_FRC0043,"Cdiphtheriae_NCTC11397","Cpseudotuberculosis_31","Cpseudotuberculosis_ATCC19410","Crouxii_FRC0190","Csilvaticum_KL0182","Culcerans_NCTC12077","Culcerans_NCTC7910"	21.2953	0.149688	3.07164	0.198394	0.154971	2.9916	0	4	1. 0.51226;2. 5;3. 13;4. 8;5. 7;6. 19;7. 7;8. 19;9. 13;10. R;11. CGT	1. 0.59443;2. 74;3. 220;4. 80;5. 76;6. 226;7. 76;8. 226;9. 220;10. G;11. GGG	1. 0.66185;2. 95;3. 283;4. 103;5. 99;6. 295;7. 101;8. 301;9. 259;10. V;11. GTA	1. 0.93828;2. 154;3. 460;4. 167;5. 160;6. 478;7. 162;8. 484;9. 436;10. T;11. ACA
ERS451417_02085	1717.62.peg.2099	0.20504	0.10252	0.02563	0.02563	4	Cbelfantii_FRC0043,"Cdiphtheriae_NCTC11397","Cmustelae_DSM45274","Crouxii_FRC0190"	64.341	0.144571	2.25277	0.378428	0.153971	2.19544	0	3	1. 0.81028;2. 29;3. 85;4. 38;5. 38;6. 112;7. 43;8. 127;9. 85;10. S;11. TCA	1. 0.92704;2. 44;3. 130;4. 53;5. 53;6. 157;7. 58;8. 172;9. 130;10. T;11. ACG	1. 0.92853;2. 45;3. 133;4. 54;5. 54;6. 160;7. 59;8. 175;9. 133;10. P;11. CCG
ERS451417_00452	1717.62.peg.456	0.8328	0.2776	0.1041	0.1041	10	Cbelfantii_FRC0043,"Cdiphtheriae_NCTC11397","Cepidermidicanis_DSM45586","Cmustelae_DSM45274","Cpseudotuberculosis_31","Cpseudotuberculosis_ATCC19410","Crouxii_FRC0190","Csilvaticum_KL0182","Culcerans_NCTC12077","Culcerans_NCTC7910"	7.31748	0.206081	2.28763	0.219861	0.205186	2.28943	0	1	1. 0.97068;2. 248;3. 742;4. 310;5. 267;6. 799;7. 271;8. 811;9. 631;10. D;11. GAC
ERS451417_01234	1717.62.peg.1242	1	1	0.668	0.668	15	Cargentoratense_DSM44202,"Cbelfantii_FRC0043","Cdiphtheriae_NCTC11397","Cepidermidicanis_DSM45586","Ckroppenstedtii_DSM44385","Ckutscheri_DSM20755","Clactis_RW25","Cmustelae_DSM45274","Cpseudotuberculosis_31","Cpseudotuberculosis_ATCC19410","Crouxii_FRC0190","Csilvaticum_KL0182","Culcerans_NCTC12077","Culcerans_NCTC7910","Cvitaeruminis_DSM20294"	19.2798	0.175628	2.39137	1	0.176085	2.38698	0	2	1. 0.93484;2. 44;3. 130;4. 46;5. 46;6. 136;7. 46;8. 136;9. 124;10. V;11. GTC	1. 0.93424;2. 123;3. 367;4. 125;5. 125;6. 373;7. 125;8. 373;9. 361;10. A;11. GCG
ERS451417_00104	1717.62.peg.102	1	1	0.9984	0.9984	12	Cbelfantii_FRC0043,"Cdeserti_GIMN1010","Cdiphtheriae_NCTC11397","Cefficiens_YS314","Chalotolerans_YIM70093","Cpseudotuberculosis_31","Cpseudotuberculosis_ATCC19410","Crouxii_FRC0190","Csilvaticum_KL0182","Culcerans_NCTC12077","Culcerans_NCTC7910","Cvitaeruminis_DSM20294"	1	0.214849	2.13452	0.999991	0.214849	2.13452	0	4	1. 0.57593;2. 40;3. 118;4. 86;5. 86;6. 256;7. 100;8. 298;9. 76;10. V;11. GTG	1. 0.9432;2. 120;3. 358;4. 168;5. 167;6. 499;7. 181;8. 541;9. 310;10. A;11. GCG	1. 0.94697;2. 121;3. 361;4. 169;5. 168;6. 502;7. 182;8. 544;9. 313;10. A;11. GCT	1. 0.94587;2. 129;3. 385;4. 177;5. 176;6. 526;7. 190;8. 568;9. 337;10. G;11. GGT
ERS451417_00786	1717.62.peg.793	1	1	1	1	4	Cbelfantii_FRC0043,"Cdiphtheriae_NCTC11397","Crouxii_FRC0190","Culcerans_NCTC12077"	1	0.27891	1.59308	1	0.27891	1.59308	0	23	1. 0.45616;2. 83;3. 247;4. 96;5. 95;6. 283;7. 101;8. 301;9. 175;10. L;11. CTC	1. 0.77169;2. 85;3. 253;4. 98;5. 97;6. 289;7. 103;8. 307;9. 181;10. T;11. ACC	1. 0.70535;2. 95;3. 283;4. 108;5. 107;6. 319;7. 113;8. 337;9. 211;10. V;11. GTA	1. 0.75913;2. 142;3. 424;4. 156;5. 154;6. 460;7. 161;8. 481;9. 349;10. V;11. GTA	1. 0.48235;2. 145;3. 433;4. 159;5. 157;6. 469;7. 164;8. 490;9. 358;10. S;11. AGT	1. 0.41234;2. 149;3. 445;4. 164;5. 162;6. 484;7. 168;8. 502;9. 370;10. D;11. GAT	1. 0.84561;2. 183;3. 547;4. 203;5. 196;6. 586;7. 202;8. 604;9. 469;10. R;11. CGC	1. 0.4519;2. 191;3. 571;4. 211;5. 204;6. 610;7. 210;8. 628;9. 490;10. E;11. GAA	1. 0.83329;2. 234;3. 700;4. 254;5. 247;6. 739;7. 254;8. 760;9. 598;10. Q;11. CAG	1. 0.42639;2. 247;3. 739;4. 269;5. 262;6. 784;7. 269;8. 805;9. 637;10. N;11. AAC	1. 0.82205;2. 250;3. 748;4. 276;5. 265;6. 793;7. 272;8. 814;9. 646;10. Q;11. CAG	1. 0.81142;2. 256;3. 766;4. 282;5. 271;6. 811;7. 278;8. 832;9. 664;10. L;11. CTG	1. 0.77112;2. 271;3. 811;4. 298;5. 286;6. 856;7. 293;8. 877;9. 709;10. G;11. GGT	1. 0.7213;2. 285;3. 853;4. 315;5. 300;6. 898;7. 307;8. 919;9. 751;10. V;11. GTG	1. 0.43865;2. 288;3. 862;4. 318;5. 303;6. 907;7. 310;8. 928;9. 760;10. N;11. AAT	1. 0.80952;2. 297;3. 889;4. 327;5. 312;6. 934;7. 319;8. 955;9. 787;10. S;11. TCT	1. 0.42022;2. 305;3. 913;4. 335;5. 320;6. 958;7. 327;8. 979;9. 811;10. H;11. CAC	1. 0.84274;2. 307;3. 919;4. 337;5. 322;6. 964;7. 329;8. 985;9. 817;10. I;11. ATT	1. 0.84694;2. 314;3. 940;4. 344;5. 329;6. 985;7. 336;8. 1006;9. 838;10. K;11. AAA	1. 0.50832;2. 317;3. 949;4. 347;5. 332;6. 994;7. 339;8. 1015;9. 847;10. D;11. GAT	1. 0.4519;2. 318;3. 952;4. 348;5. 333;6. 997;7. 340;8. 1018;9. 850;10. E;11. GAA	1. 0.8131;2. 323;3. 967;4. 353;5. 338;6. 1012;7. 345;8. 1033;9. 865;10. H;11. CAC	1. 0.6794;2. 349;3. 1045;4. 379;5. 364;6. 1090;7. 371;8. 1111;9. 943;10. A;11. GCC
ERS451417_00385	1717.62.peg.385	1	1	1	1	7	Cbelfantii_FRC0043,"Cdiphtheriae_NCTC11397","Cpseudotuberculosis_ATCC19410","Crouxii_FRC0190","Csilvaticum_KL0182","Culcerans_NCTC12077","Culcerans_NCTC7910"	0.99999	0.322576	3.39764	1	0.322586	3.39764	0	3	1. 0.8793;2. 170;3. 508;4. 226;5. 187;6. 559;7. 193;8. 577;9. 379;10. M;11. ATG	1. 0.57606;2. 182;3. 544;4. 252;5. 199;6. 595;7. 205;8. 613;9. 415;10. M;11. ATG	1. 0.82986;2. 206;3. 616;4. 280;5. 224;6. 670;7. 230;8. 688;9. 484;10. V;11. GTG
ERS451417_00085	1717.62.peg.82	1	1	1	1	6	Cbelfantii_FRC0043,"Cdiphtheriae_NCTC11397","Cimitans_DSM44264","Clactis_RW25","Cmustelae_DSM45274","Crouxii_FRC0190"	0.999862	0.128372	2.3574	0.144059	0.128605	2.33867	0	1	1. 0.50359;2. 109;3. 325;4. 135;5. 127;6. 379;7. 130;8. 388;9. 268;10. A;11. GCT
ERS451417_01265	1717.62.peg.1273	NA	NA	NA	0.0005896	3	Cbelfantii_FRC0043,"Cdiphtheriae_NCTC11397","Crouxii_FRC0190"	59.089	0.59228	9.99849	0.54108	0.54108	4.64148	128	7	1. 0.44499;2. 6;3. 16;4. 34;5. 6;6. 16;7. 6;8. 16;9. 13;10. A;11. GCC	1. 0.43488;2. 13;3. 37;4. 41;5. 13;6. 37;7. 13;8. 37;9. 34;10. V;11. GTC	1. 0.87973;2. 16;3. 46;4. 44;5. 16;6. 46;7. 16;8. 46;9. 43;10. D;11. GAC	1. 0.73355;2. 21;3. 61;4. 49;5. 21;6. 61;7. 21;8. 61;9. 58;10. G;11. GGG	1. 0.47021;2. 32;3. 94;4. 60;5. 32;6. 94;7. 32;8. 94;9. 91;10. L;11. TTG	1. 0.753;2. 55;3. 163;4. 83;5. 55;6. 163;7. 55;8. 163;9. 160;10. L;11. CTG	1. 0.48086;2. 63;3. 187;4. 91;5. 63;6. 187;7. 63;8. 187;9. 184;10. S;11. TCG
ERS451417_00150	1717.62.peg.147	NA	NA	NA	0.0007636	3	Cbelfantii_FRC0043,"Cdiphtheriae_NCTC11397","Crouxii_FRC0190"	9.47902	0.1296	3.2763	0.16986	0.131375	3.36418	128	8	1. 0.65732;2. 74;3. 220;4. 129;5. 129;6. 385;7. 143;8. 427;9. 220;10. M;11. ATG	1. 0.68369;2. 121;3. 361;4. 176;5. 176;6. 526;7. 190;8. 568;9. 361;10. D;11. GAT	1. 0.67142;2. 141;3. 421;4. 196;5. 196;6. 586;7. 210;8. 628;9. 421;10. N;11. AAT	1. 0.56542;2. 285;3. 853;4. 345;5. 340;6. 1018;7. 354;8. 1060;9. 853;10. S;11. TCG	1. 0.58249;2. 323;3. 967;4. 398;5. 378;6. 1132;7. 392;8. 1174;9. 967;10. R;11. AGG	1. 0.65632;2. 382;3. 1144;4. 459;5. 437;6. 1309;7. 451;8. 1351;9. 1144;10. K;11. AAG	1. 0.91594;2. 398;3. 1192;4. 475;5. 453;6. 1357;7. 467;8. 1399;9. 1192;10. L;11. CTC	1. 0.89935;2. 399;3. 1195;4. 476;5. 454;6. 1360;7. 468;8. 1402;9. 1195;10. T;11. ACT
ERS451417_00744	1717.62.peg.747	NA	NA	NA	0.00124	3	Cbelfantii_FRC0043,"Cdiphtheriae_NCTC11397","Crouxii_FRC0190"	9.31594	0.16663	5.36506	0.204325	0.183828	4.68404	128	4	1. 0.72372;2. 333;3. 997;4. 389;5. 333;6. 997;7. 333;8. 997;9. 997;10. P;11. CCA	1. 0.88163;2. 488;3. 1462;4. 604;5. 488;6. 1462;7. 488;8. 1462;9. 1450;10. H;11. CAT	1. 0.64634;2. 493;3. 1477;4. 609;5. 493;6. 1477;7. 493;8. 1477;9. 1462;10. T;11. ACA	1. 0.88184;2. 504;3. 1510;4. 622;5. 504;6. 1510;7. 504;8. 1510;9. 1495;10. E;11. GAA
ERS451417_01861	1717.62.peg.1863	NA	NA	NA	0.001484	3	Cbelfantii_FRC0043,"Cdiphtheriae_NCTC11397","Crouxii_FRC0190"	0.370973	0.0779609	4.72877	0.145431	0.0911244	4.39091	130	8	1. 0.93177;2. 147;3. 439;4. 166;5. 149;6. 445;7. 149;8. 445;9. 418;10. H;11. CAC	1. 0.74531;2. 198;3. 592;4. 229;5. 200;6. 598;7. 200;8. 598;9. 571;10. S;11. AGC	1. 0.94544;2. 237;3. 709;4. 277;5. 239;6. 715;7. 239;8. 715;9. 688;10. Q;11. CAG	1. 0.41482;2. 242;3. 724;4. 287;5. 244;6. 730;7. 244;8. 730;9. 703;10. P;11. CCT	1. 0.88609;2. 252;3. 754;4. 297;5. 254;6. 760;7. 254;8. 760;9. 733;10. V;11. GTG	1. 0.9356;2. 255;3. 763;4. 300;5. 257;6. 769;7. 257;8. 769;9. 742;10. S;11. TCG	1. 0.68811;2. 283;3. 847;4. 328;5. 285;6. 853;7. 285;8. 853;9. 826;10. P;11. CCA	1. 0.89414;2. 329;3. 985;4. 380;5. 331;6. 991;7. 331;8. 991;9. 964;10. G;11. GGT
ERS451417_00949	1717.62.peg.956	NA	NA	NA	0.001695	3	Cbelfantii_FRC0043,"Cdiphtheriae_NCTC11397","Crouxii_FRC0190"	28.9041	1	5.38589	0.99999	0.99999	3.84005	128	6	1. 0.46012;2. 13;3. 37;4. 13;5. 13;6. 37;7. 13;8. 37;9. 37;10. T;11. ACC	1. 0.79791;2. 35;3. 103;4. 35;5. 35;6. 103;7. 35;8. 103;9. 103;10. R;11. CGC	1. 0.48219;2. 36;3. 106;4. 36;5. 36;6. 106;7. 36;8. 106;9. 106;10. Y;11. TAC	1. 0.443;2. 38;3. 112;4. 38;5. 38;6. 112;7. 38;8. 112;9. 112;10. Y;11. TAT	1. 0.48649;2. 41;3. 121;4. 41;5. 41;6. 121;7. 41;8. 121;9. 121;10. R;11. CGG	1. 0.46757;2. 55;3. 163;4. 55;5. 55;6. 163;7. 55;8. 163;9. 163;10. F;11. TTT
ERS451417_00243	1717.62.peg.238	NA	NA	NA	0.004086	3	Cbelfantii_FRC0043,"Cdiphtheriae_NCTC11397","Crouxii_FRC0190"	3.8458	0.16922	5.11407	0.281838	0.141067	4.07418	128	5	1. 0.61044;2. 6;3. 16;4. 18;5. 6;6. 16;7. 6;8. 16;9. 16;10. F;11. TTC	1. 0.4748;2. 13;3. 37;4. 25;5. 13;6. 37;7. 13;8. 37;9. 37;10. V;11. GTT	1. 0.89841;2. 66;3. 196;4. 125;5. 66;6. 196;7. 66;8. 196;9. 196;10. R;11. CGC	1. 0.87844;2. 70;3. 208;4. 129;5. 70;6. 208;7. 70;8. 208;9. 208;10. A;11. GCT	1. 0.44681;2. 193;3. 577;4. 280;5. 193;6. 577;7. 193;8. 577;9. 577;10. V;11. GTG
ERS451417_00328	1717.62.peg.330	NA	NA	NA	0.004499	23	Cbelfantii_FRC0043,"Ccallunae_DSM20147","Cdeserti_GIMN1010","Cdiphtheriae_NCTC11397","Cdoosanense_DSM45436","Cefficiens_YS314","Cepidermidicanis_DSM45586","Cglutamicum_ATCC13032","Chalotolerans_YIM70093","Chumireducens_DSM45392","Cimitans_DSM44264","Ckutscheri_DSM20755","Cmarinum_DSM44953","Cmustelae_DSM45274","Cpseudotuberculosis_31","Cpseudotuberculosis_ATCC19410","Crouxii_FRC0190","Csilvaticum…	2.83098	0.194137	1.58484	0.19464	0.194567	1.58284	3072	1	1. 0.96029;2. 498;3. 1492;4. 627;5. 582;6. 1744;7. 816;8. 2446;9. 955;10. S;11. AGC
ERS451417_00580	1717.62.peg.583	NA	NA	NA	0.007338	3	Cbelfantii_FRC0043,"Cdiphtheriae_NCTC11397","Crouxii_FRC0190"	3.97867	0.22358	2.99995	0.337623	0.206048	2.65134	128	9	1. 0.49895;2. 132;3. 394;4. 132;5. 132;6. 394;7. 132;8. 394;9. 394;10. K;11. AAA	1. 0.82288;2. 141;3. 421;4. 142;5. 141;6. 421;7. 141;8. 421;9. 421;10. G;11. GGA	1. 0.41886;2. 154;3. 460;4. 155;5. 154;6. 460;7. 154;8. 460;9. 460;10. P;11. CCA	1. 0.6871;2. 186;3. 556;4. 187;5. 186;6. 556;7. 186;8. 556;9. 556;10. T;11. ACC	1. 0.8263;2. 188;3. 562;4. 189;5. 188;6. 562;7. 188;8. 562;9. 562;10. A;11. GCG	1. 0.67882;2. 200;3. 598;4. 201;5. 200;6. 598;7. 200;8. 598;9. 598;10. Q;11. CAA	1. 0.63939;2. 225;3. 673;4. 226;5. 225;6. 673;7. 225;8. 673;9. 673;10. K;11. AAA	1. 0.90859;2. 240;3. 718;4. 243;5. 240;6. 718;7. 240;8. 718;9. 718;10. S;11. TCG	1. 0.60151;2. 248;3. 742;4. 251;5. 248;6. 742;7. 248;8. 742;9. 742;10. T;11. ACC
ERS451417_00466	1717.62.peg.470	NA	NA	NA	0.01295	12	Cbelfantii_FRC0043,"Cdiphtheriae_NCTC11397","Ckutscheri_DSM20755","Cmustelae_DSM45274","Cpseudotuberculosis_31","Cpseudotuberculosis_ATCC19410","Crouxii_FRC0190","Csilvaticum_KL0182","Culcerans_NCTC12077","Culcerans_NCTC7910","Cuterequi_DSM45634","Cvitaeruminis_DSM20294"	3.75794	0.232294	1.85933	0.245295	0.232124	1.85738	3072	2	1. 0.6;2. 83;3. 247;4. 201;5. 100;6. 298;7. 116;8. 346;9. 223;10. T;11. ACC	1. 0.88624;2. 372;3. 1114;4. 527;5. 396;6. 1186;7. 412;8. 1234;9. 1030;10. P;11. CCC
ERS451417_00213	1717.62.peg.210	NA	NA	NA	0.021	6	Cbelfantii_FRC0043,"Cdiphtheriae_NCTC11397","Cmustelae_DSM45274","Cpseudotuberculosis_31","Cpseudotuberculosis_ATCC19410","Crouxii_FRC0190"	0.427712	0.0890981	3.99439	0.11492	0.0890159	3.92368	2	1	1. 0.9397;2. 38;3. 112;4. 38;5. 38;6. 112;7. 38;8. 112;9. 112;10. K;11. AAG
ERS451417_00510	1717.62.peg.514	NA	NA	NA	0.02918	39	Cargentoratense_DSM44202,"Catypicum_R2070","Caurimucosum_ATCC700975","Cbelfantii_FRC0043","Ccallunae_DSM20147","Ccamporealensis_DSM44610","Cdeserti_GIMN1010","Cdiphtheriae_NCTC11397","Cdoosanense_DSM45436","Cefficiens_YS314","Cepidermidicanis_DSM45586","Cfalsenii_DSM44353","Cglutamicum_ATCC13032","Cglycinophilum_AJ3170","Chalotolerans_YIM70093","Chumireducens_DSM45392","Cimitans_DSM44264","Cjeike…	2.79526	0.158322	1.85925	0.166145	0.158067	1.84837	2048	1	1. 0.97037;2. 334;3. 1000;4. 334;5. 334;6. 1000;7. 334;8. 1000;9. 661;10. A;11. GCT
ERS451417_00095	1717.62.peg.93	NA	NA	NA	0.03211	11	Cbelfantii_FRC0043,"Cdiphtheriae_NCTC11397","Cglutamicum_ATCC13032","Cglycinophilum_AJ3170","Cpseudotuberculosis_31","Cpseudotuberculosis_ATCC19410","Crouxii_FRC0190","Csilvaticum_KL0182","Cterpenotabidum_Y11","Culcerans_NCTC12077","Culcerans_NCTC7910"	2.31371	0.069576	1.95325	0.133115	0.0644949	1.93019	2048	5	1. 0.98354;2. 110;3. 328;4. 138;5. 131;6. 391;7. 146;8. 436;9. 193;10. T;11. ACC	1. 0.98864;2. 118;3. 352;4. 147;5. 139;6. 415;7. 154;8. 460;9. 217;10. A;11. GCA	1. 0.58282;2. 242;3. 724;4. 279;5. 270;6. 808;7. 286;8. 856;9. 577;10. V;11. GTA	1. 0.50068;2. 329;3. 985;4. 385;5. 363;6. 1087;7. 396;8. 1186;9. 727;10. L;11. CTC	1. 0.48181;2. 430;3. 1288;4. 494;5. 472;6. 1414;7. 515;8. 1543;9. 952;10. A;11. GCC
ERS451417_00025	1717.62.peg.22	NA	NA	NA	0.03294	32	Cargentoratense_DSM44202,"Catypicum_R2070","Caurimucosum_ATCC700975","Cbelfantii_FRC0043","Ccallunae_DSM20147","Cdeserti_GIMN1010","Cdiphtheriae_NCTC11397","Cdoosanense_DSM45436","Cefficiens_YS314","Cfalsenii_DSM44353","Cglutamicum_ATCC13032","Cglycinophilum_AJ3170","Chalotolerans_YIM70093","Cjeikeium_K41","Ckroppenstedtii_DSM44385","Ckutscheri_DSM20755","Cmustelae_DSM45274","Cpseudotuberculosis_…	0.191317	0.191062	1.48543	1	0.1914	1.48745	3074	1	1. 0.64725;2. 216;3. 646;4. 234;5. 234;6. 700;7. 383;8. 1147;9. 457;10. S;11. TCG
ERS451417_00367	1717.62.peg.366	NA	NA	NA	0.04599	8	Cbelfantii_FRC0043,"Cdiphtheriae_NCTC11397","Cpseudotuberculosis_31","Cpseudotuberculosis_ATCC19410","Crouxii_FRC0190","Csilvaticum_KL0182","Culcerans_NCTC12077","Culcerans_NCTC7910"	0.372461	0.0694337	2.33796	0.150809	0.0706432	2.30216	2	10	1. 0.94036;2. 25;3. 73;4. 48;5. 34;6. 100;7. 43;8. 127;9. 10;10. W;11. TGG	1. 0.93277;2. 46;3. 136;4. 70;5. 55;6. 163;7. 64;8. 190;9. 73;10. G;11. GGT	1. 0.85895;2. 49;3. 145;4. 73;5. 58;6. 172;7. 67;8. 199;9. 82;10. K;11. AAG	1. 0.93152;2. 62;3. 184;4. 86;5. 71;6. 211;7. 80;8. 238;9. 121;10. L;11. CTT	1. 0.65146;2. 66;3. 196;4. 90;5. 75;6. 223;7. 84;8. 250;9. 133;10. Q;11. CAG	1. 0.49794;2. 69;3. 205;4. 93;5. 78;6. 232;7. 87;8. 259;9. 142;10. I;11. ATA	1. 0.76544;2. 71;3. 211;4. 95;5. 80;6. 238;7. 89;8. 265;9. 148;10. K;11. AAA	1. 0.62718;2. 90;3. 268;4. 114;5. 99;6. 295;7. 108;8. 322;9. 205;10. S;11. TCT	1. 0.54662;2. 210;3. 628;4. 456;5. 219;6. 655;7. 228;8. 682;9. 565;10. N;11. AAT	1. 0.93678;2. 230;3. 688;4. 492;5. 255;6. 763;7. 272;8. 814;9. 604;10. S;11. TCG
ERS451417_00100	1717.62.peg.98	NA	NA	NA	0.04613	3	Cbelfantii_FRC0043,"Cdiphtheriae_NCTC11397","Crouxii_FRC0190"	1.26301	0.183477	5.79216	0.25794	0.18899	5.05032	128	6	1. 0.47724;2. 12;3. 34;4. 44;5. 38;6. 112;7. 38;8. 112;9. 34;10. F;11. TTT	1. 0.49135;2. 14;3. 40;4. 46;5. 40;6. 118;7. 40;8. 118;9. 40;10. G;11. GGC	1. 0.8815;2. 95;3. 283;4. 142;5. 121;6. 361;7. 121;8. 361;9. 271;10. R;11. CGA	1. 0.87251;2. 136;3. 406;4. 184;5. 162;6. 484;7. 162;8. 484;9. 394;10. T;11. ACG	1. 0.50952;2. 137;3. 409;4. 185;5. 163;6. 487;7. 163;8. 487;9. 397;10. I;11. ATC	1. 0.50701;2. 139;3. 415;4. 187;5. 165;6. 493;7. 165;8. 493;9. 403;10. T;11. ACC
ERS451417_00729	1717.62.peg.732	NA	NA	NA	0.06018	15	Cargentoratense_DSM44202,"Cbelfantii_FRC0043","Cdiphtheriae_NCTC11397","Cepidermidicanis_DSM45586","Ckroppenstedtii_DSM44385","Ckutscheri_DSM20755","Clactis_RW25","Cmustelae_DSM45274","Cpseudotuberculosis_31","Cpseudotuberculosis_ATCC19410","Crouxii_FRC0190","Csilvaticum_KL0182","Culcerans_NCTC12077","Culcerans_NCTC7910","Cvitaeruminis_DSM20294"	31.4005	0.156667	2.45221	0.542977	0.156535	2.44061	3072	3	1. 0.94383;2. 80;3. 238;4. 116;5. 116;6. 346;7. 116;8. 346;9. 217;10. R;11. CGC	1. 0.9931;2. 81;3. 241;4. 117;5. 117;6. 349;7. 117;8. 349;9. 220;10. R;11. CGG	1. 0.99058;2. 228;3. 682;4. 276;5. 276;6. 826;7. 283;8. 847;9. 535;10. E;11. GAA
ERS451417_00917	1717.62.peg.924	NA	NA	NA	0.06416	18	Catypicum_R2070,"Cbelfantii_FRC0043","Ccamporealensis_DSM44610","Cdiphtheriae_NCTC11397","Cepidermidicanis_DSM45586","Cfalsenii_DSM44353","Cglycinophilum_AJ3170","Cjeikeium_K41","Ckroppenstedtii_DSM44385","Cpseudotuberculosis_31","Cpseudotuberculosis_ATCC19410","Crouxii_FRC0190","Csilvaticum_KL0182","Csimulans_PES1","Culcerans_NCTC12077","Culcerans_NCTC7910","Cuterequi_DSM45634","Cvitaeruminis_DS…	1.78442	0.169916	1.71589	0.176161	0.171108	1.71103	2048	1	1. 0.93809;2. 169;3. 505;4. 210;5. 210;6. 628;7. 249;8. 745;9. 403;10. A;11. GCC
ERS451417_00954	1717.62.peg.961	NA	NA	NA	0.06765	39	Cargentoratense_DSM44202,"Catypicum_R2070","Caurimucosum_ATCC700975","Cbelfantii_FRC0043","Ccallunae_DSM20147","Ccamporealensis_DSM44610","Cdeserti_GIMN1010","Cdiphtheriae_NCTC11397","Cdoosanense_DSM45436","Cefficiens_YS314","Cepidermidicanis_DSM45586","Cfalsenii_DSM44353","Cglutamicum_ATCC13032","Cglycinophilum_AJ3170","Chalotolerans_YIM70093","Chumireducens_DSM45392","Cimitans_DSM44264","Cjeike…	0.237315	0.0837399	1.75897	0.0964109	0.0837395	1.759	1026	2	1. 0.89379;2. 148;3. 442;4. 187;5. 187;6. 559;7. 202;8. 604;9. 394;10. S;11. TCG	1. 0.5134;2. 286;3. 856;4. 325;5. 325;6. 973;7. 340;8. 1018;9. 808;10. V;11. GTC
ERS451417_00991	1717.62.peg.1002	NA	NA	NA	0.06952	28	Cargentoratense_DSM44202,"Cbelfantii_FRC0043","Cdeserti_GIMN1010","Cdiphtheriae_NCTC11397","Cefficiens_YS314","Cepidermidicanis_DSM45586","Cfalsenii_DSM44353","Cglutamicum_ATCC13032","Cglycinophilum_AJ3170","Chalotolerans_YIM70093","Chumireducens_DSM45392","Cjeikeium_K41","Ckroppenstedtii_DSM44385","Ckutscheri_DSM20755","Cmarinum_DSM44953","Cmaris_DSM45190","Cmustelae_DSM45274","Cpseudotuberculos…	3.87353	0.187917	1.70575	0.191667	0.1881	1.70341	3072	2	1. 0.45946;2. 191;3. 571;4. 214;5. 214;6. 640;7. 263;8. 787;9. 466;10. S;11. TCT	1. 0.97475;2. 235;3. 703;4. 258;5. 258;6. 772;7. 307;8. 919;9. 598;10. G;11. GGC
ERS451417_00913	1717.62.peg.920	NA	NA	NA	0.0746	3	Cbelfantii_FRC0043,"Cdiphtheriae_NCTC11397","Crouxii_FRC0190"	6.37531	0.0921734	3.03467	0.0973671	0.0973671	2.75825	128	1	1. 0.80173;2. 121;3. 361;4. 156;5. 121;6. 361;7. 129;8. 385;9. 334;10. N;11. AAC
ERS451417_00814	1717.62.peg.820	NA	NA	NA	0.1304	3	Cbelfantii_FRC0043,"Cdiphtheriae_NCTC11397","Crouxii_FRC0190"	7.32517	0.135475	4.7132	0.175827	0.175827	4.16115	128	6	1. 0.40125;2. 9;3. 25;4. 9;5. 9;6. 25;7. 9;8. 25;9. 25;10. E;11. GAA	1. 0.71435;2. 18;3. 52;4. 18;5. 18;6. 52;7. 18;8. 52;9. 52;10. Y;11. TAC	1. 0.53247;2. 121;3. 361;4. 121;5. 121;6. 361;7. 121;8. 361;9. 361;10. S;11. AGC	1. 0.87725;2. 132;3. 394;4. 132;5. 132;6. 394;7. 132;8. 394;9. 394;10. A;11. GCT	1. 0.63168;2. 136;3. 406;4. 136;5. 136;6. 406;7. 136;8. 406;9. 406;10. F;11. TTT	1. 0.6542;2. 156;3. 466;4. 156;5. 156;6. 466;7. 156;8. 466;9. 466;10. Q;11. CAA
ERS451417_00661	1717.62.peg.665	NA	NA	NA	0.146	36	Catypicum_R2070,"Caurimucosum_ATCC700975","Cbelfantii_FRC0043","Ccallunae_DSM20147","Ccamporealensis_DSM44610","Cdeserti_GIMN1010","Cdiphtheriae_NCTC11397","Cdoosanense_DSM45436","Cefficiens_YS314","Cepidermidicanis_DSM45586","Cfalsenii_DSM44353","Cglutamicum_ATCC13032","Chalotolerans_YIM70093","Chumireducens_DSM45392","Cimitans_DSM44264","Cjeikeium_K41","Ckroppenstedtii_DSM44385","Ckutscheri_DSM…	0.248735	0.248735	1.556	1	0.248303	1.55701	3074	1	1. 0.65535;2. 88;3. 262;4. 123;5. 120;6. 358;7. 161;8. 481;9. 151;10. Q;11. CAA
ERS451417_01180	1717.62.peg.1189	NA	NA	NA	0.1483	39	Cargentoratense_DSM44202,"Catypicum_R2070","Caurimucosum_ATCC700975","Cbelfantii_FRC0043","Ccallunae_DSM20147","Ccamporealensis_DSM44610","Cdeserti_GIMN1010","Cdiphtheriae_NCTC11397","Cdoosanense_DSM45436","Cefficiens_YS314","Cepidermidicanis_DSM45586","Cfalsenii_DSM44353","Cglutamicum_ATCC13032","Cglycinophilum_AJ3170","Chalotolerans_YIM70093","Chumireducens_DSM45392","Cimitans_DSM44264","Cjeike…	0.363754	0.221503	1.71999	0.22682	0.221507	1.71909	2050	1	1. 0.91501;2. 220;3. 658;4. 234;5. 234;6. 700;7. 261;8. 781;9. 466;10. L;11. TTG
ERS451417_01013	1717.62.peg.1024	NA	NA	NA	0.1927	3	Cbelfantii_FRC0043,"Cdiphtheriae_NCTC11397","Crouxii_FRC0190"	0.393655	0.215769	5.29609	0.237699	0.237699	5.24073	130	2	1. 0.52392;2. 35;3. 103;4. 83;5. 42;6. 124;7. 42;8. 124;9. 103;10. L;11. TTG	1. 0.74431;2. 404;3. 1210;4. 497;5. 411;6. 1231;7. 411;8. 1231;9. 1210;10. H;11. CAC
ERS451417_01184	1717.62.peg.1193	NA	NA	NA	0.2016	39	Cargentoratense_DSM44202,"Catypicum_R2070","Caurimucosum_ATCC700975","Cbelfantii_FRC0043","Ccallunae_DSM20147","Ccamporealensis_DSM44610","Cdeserti_GIMN1010","Cdiphtheriae_NCTC11397","Cdoosanense_DSM45436","Cefficiens_YS314","Cepidermidicanis_DSM45586","Cfalsenii_DSM44353","Cglutamicum_ATCC13032","Cglycinophilum_AJ3170","Chalotolerans_YIM70093","Chumireducens_DSM45392","Cimitans_DSM44264","Cjeike…	0.0981577	0.0981577	1.50781	0.204258	0.0980232	1.51207	258	0
ERS451417_00740	1717.62.peg.743	NA	NA	NA	0.257	34	Cargentoratense_DSM44202,"Catypicum_R2070","Caurimucosum_ATCC700975","Cbelfantii_FRC0043","Ccamporealensis_DSM44610","Cdeserti_GIMN1010","Cdiphtheriae_NCTC11397","Cdoosanense_DSM45436","Cefficiens_YS314","Cepidermidicanis_DSM45586","Cfalsenii_DSM44353","Cglutamicum_ATCC13032","Cglycinophilum_AJ3170","Chalotolerans_YIM70093","Chumireducens_DSM45392","Cimitans_DSM44264","Cjeikeium_K41","Clactis_RW2…	0.403683	0.363441	1.75179	0.371865	0.362989	1.75106	3074	2	1. 0.95172;2. 159;3. 475;4. 175;5. 175;6. 523;7. 304;8. 910;9. 208;10. P;11. CCC	1. 0.45657;2. 274;3. 820;4. 299;5. 299;6. 895;7. 444;8. 1330;9. 511;10. V;11. GTC
ERS451417_00997	1717.62.peg.1008	NA	NA	NA	0.2732	3	Cbelfantii_FRC0043,"Cdiphtheriae_NCTC11397","Crouxii_FRC0190"	0.806284	0.339217	4.15167	0.657417	0.332642	3.86783	130	17	1. 0.67783;2. 5;3. 13;4. 5;5. 5;6. 13;7. 5;8. 13;9. 13;10. S;11. AGC	1. 0.40894;2. 15;3. 43;4. 15;5. 15;6. 43;7. 15;8. 43;9. 43;10. L;11. CTA	1. 0.64873;2. 20;3. 58;4. 20;5. 20;6. 58;7. 20;8. 58;9. 58;10. A;11. GCT	1. 0.41615;2. 22;3. 64;4. 22;5. 22;6. 64;7. 22;8. 64;9. 64;10. R;11. CGC	1. 0.46672;2. 23;3. 67;4. 23;5. 23;6. 67;7. 23;8. 67;9. 67;10. T;11. ACT	1. 0.52132;2. 41;3. 121;4. 41;5. 41;6. 121;7. 41;8. 121;9. 121;10. Y;11. TAT	1. 0.57857;2. 49;3. 145;4. 49;5. 49;6. 145;7. 49;8. 145;9. 145;10. W;11. TGG	1. 0.76061;2. 59;3. 175;4. 59;5. 59;6. 175;7. 59;8. 175;9. 175;10. K;11. AAA	1. 0.74008;2. 70;3. 208;4. 70;5. 70;6. 208;7. 70;8. 208;9. 208;10. V;11. GTA	1. 0.66381;2. 83;3. 247;4. 91;5. 91;6. 271;7. 91;8. 271;9. 247;10. K;11. AAA	1. 0.57029;2. 85;3. 253;4. 93;5. 93;6. 277;7. 93;8. 277;9. 253;10. F;11. TTC	1. 0.44901;2. 87;3. 259;4. 95;5. 95;6. 283;7. 95;8. 283;9. 259;10. G;11. GGC	1. 0.58396;2. 120;3. 358;4. 128;5. 128;6. 382;7. 128;8. 382;9. 358;10. F;11. TTC	1. 0.72836;2. 127;3. 379;4. 135;5. 135;6. 403;7. 135;8. 403;9. 379;10. G;11. GGA	1. 0.74737;2. 138;3. 412;4. 146;5. 146;6. 436;7. 146;8. 436;9. 412;10. G;11. GGT	1. 0.80378;2. 143;3. 427;4. 151;5. 151;6. 451;7. 151;8. 451;9. 427;10. C;11. TGC	1. 0.76878;2. 219;3. 655;4. 231;5. 227;6. 679;7. 227;8. 679;9. 655;10. E;11. GAG
ERS451417_00716	1717.62.peg.721	NA	NA	NA	0.305	31	Cargentoratense_DSM44202,"Caurimucosum_ATCC700975","Cbelfantii_FRC0043","Ccallunae_DSM20147","Ccamporealensis_DSM44610","Cdeserti_GIMN1010","Cdiphtheriae_NCTC11397","Cefficiens_YS314","Cepidermidicanis_DSM45586","Cfalsenii_DSM44353","Cglycinophilum_AJ3170","Chalotolerans_YIM70093","Chumireducens_DSM45392","Cimitans_DSM44264","Cjeikeium_K41","Cmarinum_DSM44953","Cmaris_DSM45190","Cmustelae_DSM4527…	0.234097	0.175392	1.69702	0.204928	0.175491	1.69658	3074	3	1. 0.97424;2. 35;3. 103;4. 61;5. 53;6. 157;7. 160;8. 478;9. 52;10. Q;11. CAA	1. 0.42637;2. 80;3. 238;4. 106;5. 98;6. 292;7. 205;8. 613;9. 187;10. D;11. GAC	1. 0.59121;2. 193;3. 577;4. 223;5. 211;6. 631;7. 318;8. 952;9. 478;10. G;11. GGA
ERS451417_01035	1717.62.peg.1046	NA	NA	NA	0.307	3	Cbelfantii_FRC0043,"Cdiphtheriae_NCTC11397","Crouxii_FRC0190"	2.72594	1	2.78097	1	1	2.51938	128	7	1. 0.71191;2. 14;3. 40;4. 14;5. 14;6. 40;7. 14;8. 40;9. 40;10. T;11. ACA	1. 0.72977;2. 15;3. 43;4. 15;5. 15;6. 43;7. 15;8. 43;9. 43;10. R;11. CGC	1. 0.7119;2. 18;3. 52;4. 18;5. 18;6. 52;7. 18;8. 52;9. 52;10. S;11. AGT	1. 0.69717;2. 23;3. 67;4. 23;5. 23;6. 67;7. 23;8. 67;9. 67;10. V;11. GTC	1. 0.68202;2. 26;3. 76;4. 26;5. 26;6. 76;7. 26;8. 76;9. 76;10. D;11. GAC	1. 0.65151;2. 42;3. 124;4. 42;5. 42;6. 124;7. 42;8. 124;9. 124;10. L;11. TTA	1. 0.73877;2. 44;3. 130;4. 44;5. 44;6. 130;7. 44;8. 130;9. 130;10. A;11. GCG
ERS451417_00072	1717.62.peg.68	NA	NA	NA	0.3117	3	Cbelfantii_FRC0043,"Cdiphtheriae_NCTC11397","Crouxii_FRC0190"	1.08807	0.05779		0.10185	0.10185		128	5	1. 0.4369;2. 36;3. 106;4. 36;5. 36;6. 106;7. 36;8. 106;9. 106;10. T;11. ACA	1. 0.42337;2. 46;3. 136;4. 46;5. 46;6. 136;7. 46;8. 136;9. 136;10. T;11. ACG	1. 0.50088;2. 68;3. 202;4. 80;5. 80;6. 238;7. 80;8. 238;9. 163;10. D;11. GAT	1. 0.49986;2. 77;3. 229;4. 89;5. 89;6. 265;7. 89;8. 265;9. 190;10. D;11. GAC	1. 0.64671;2. 78;3. 232;4. 90;5. 90;6. 268;7. 90;8. 268;9. 193;10. A;11. GCA
ERS451417_00705	1717.62.peg.710	NA	NA	NA	0.364	18	Catypicum_R2070,"Cbelfantii_FRC0043","Ccallunae_DSM20147","Cdeserti_GIMN1010","Cdiphtheriae_NCTC11397","Cdoosanense_DSM45436","Cefficiens_YS314","Cepidermidicanis_DSM45586","Cglutamicum_ATCC13032","Chalotolerans_YIM70093","Cmarinum_DSM44953","Cmaris_DSM45190","Cmustelae_DSM45274","Crouxii_FRC0190","Csingulare_IBSB52218","Ctestudinoris_DSM44614","Culcerans_NCTC12077","Cvitaeruminis_DSM20294"	0.179241	0.0976318	1.50783	0.0992292	0.0992292	1.50385	3074	3	1. 0.66784;2. 37;3. 109;4. 77;5. 41;6. 121;7. 41;8. 121;9. 82;10. N;11. AAC	1. 0.69706;2. 78;3. 232;4. 123;5. 82;6. 244;7. 82;8. 244;9. 205;10. S;11. AGT	1. 0.64039;2. 158;3. 472;4. 211;5. 165;6. 493;7. 179;8. 535;9. 376;10. D;11. GAC
ERS451417_01256	1717.62.peg.1264	NA	NA	NA	0.3761	38	Cargentoratense_DSM44202,"Catypicum_R2070","Caurimucosum_ATCC700975","Cbelfantii_FRC0043","Ccallunae_DSM20147","Ccamporealensis_DSM44610","Cdeserti_GIMN1010","Cdiphtheriae_NCTC11397","Cdoosanense_DSM45436","Cefficiens_YS314","Cepidermidicanis_DSM45586","Cfalsenii_DSM44353","Cglutamicum_ATCC13032","Cglycinophilum_AJ3170","Chalotolerans_YIM70093","Chumireducens_DSM45392","Cimitans_DSM44264","Cjeike…	0.295053	0.243784	1.73921	0.263338	0.243804	1.7392	2	2	1. 0.5468;2. 169;3. 505;4. 194;5. 194;6. 580;7. 214;8. 640;9. 484;10. T;11. ACT	1. 0.85344;2. 186;3. 556;4. 211;5. 211;6. 631;7. 231;8. 691;9. 535;10. G;11. GGT
ERS451417_00576	1717.62.peg.579	NA	NA	NA	0.4112	8	Cbelfantii_FRC0043,"Cdiphtheriae_NCTC11397","Cpseudotuberculosis_31","Cpseudotuberculosis_ATCC19410","Crouxii_FRC0190","Csilvaticum_KL0182","Culcerans_NCTC12077","Culcerans_NCTC7910"	0.085554	0.0506507	2.92924	0.0597445	0.0597445	2.95761	2050	2	1. 0.93516;2. 102;3. 304;4. 113;5. 109;6. 325;7. 115;8. 343;9. 286;10. S;11. AGT	1. 0.63335;2. 158;3. 472;4. 169;5. 165;6. 493;7. 171;8. 511;9. 397;10. E;11. GAA
ERS451417_00386	1717.62.peg.386	NA	NA	NA	0.4515	11	Cargentoratense_DSM44202,"Catypicum_R2070","Cbelfantii_FRC0043","Cdiphtheriae_NCTC11397","Cpseudotuberculosis_31","Cpseudotuberculosis_ATCC19410","Crouxii_FRC0190","Csilvaticum_KL0182","Culcerans_NCTC12077","Culcerans_NCTC7910","Cuterequi_DSM45634"	0.263359	0.196942	2.59049	0.247417	0.195766	2.59034	2	3	1. 0.97923;2. 50;3. 148;4. 76;5. 76;6. 226;7. 82;8. 244;9. 31;10. I;11. ATC	1. 0.49604;2. 135;3. 403;4. 162;5. 162;6. 484;7. 168;8. 502;9. 283;10. P;11. CCC	1. 0.51111;2. 148;3. 442;4. 175;5. 175;6. 523;7. 181;8. 541;9. 322;10. A;11. GCG
ERS451417_00813	1717.62.peg.819	NA	NA	NA	0.4652	3	Cbelfantii_FRC0043,"Cdiphtheriae_NCTC11397","Crouxii_FRC0190"	0.220646	0.11251	8.25634	0.15341	0.15341	7.65852	130	4	1. 0.73578;2. 82;3. 244;4. 94;5. 82;6. 244;7. 82;8. 244;9. 244;10. I;11. ATC	1. 0.71101;2. 100;3. 298;4. 112;5. 100;6. 298;7. 100;8. 298;9. 298;10. H;11. CAT	1. 0.62381;2. 127;3. 379;4. 139;5. 127;6. 379;7. 127;8. 379;9. 379;10. A;11. GCA	1. 0.56862;2. 131;3. 391;4. 143;5. 131;6. 391;7. 131;8. 391;9. 391;10. V;11. GTG
ERS451417_01023	1717.62.peg.1036	NA	NA	NA	0.4809	3	Cbelfantii_FRC0043,"Cdiphtheriae_NCTC11397","Crouxii_FRC0190"	0.182114	0.12886	3.79413	0.163149	0.14348	3.76984	130	1	1. 0.67542;2. 56;3. 166;4. 145;5. 134;6. 400;7. 134;8. 400;9. 166;10. A;11. GCT
ERS451417_01043	1717.62.peg.1053	NA	NA	NA	0.4932	39	Cargentoratense_DSM44202,"Catypicum_R2070","Caurimucosum_ATCC700975","Cbelfantii_FRC0043","Ccallunae_DSM20147","Ccamporealensis_DSM44610","Cdeserti_GIMN1010","Cdiphtheriae_NCTC11397","Cdoosanense_DSM45436","Cefficiens_YS314","Cepidermidicanis_DSM45586","Cfalsenii_DSM44353","Cglutamicum_ATCC13032","Cglycinophilum_AJ3170","Chalotolerans_YIM70093","Chumireducens_DSM45392","Cimitans_DSM44264","Cjeike…	0.147755	0.147755	1.47935	0.251331	0.147647	1.48141	258	0
ERS451417_00276	1717.62.peg.273	NA	NA	NA	0.5009	3	Cdiphtheriae_NCTC11397,"Ckutscheri_DSM20755","Crouxii_FRC0190"	999	0.483285	4.00914	1	0.489165	3.99995	388	0
ERS451417_01235	1717.62.peg.1243	NA	NA	NA	0.5547	15	Cargentoratense_DSM44202,"Cbelfantii_FRC0043","Cdiphtheriae_NCTC11397","Cepidermidicanis_DSM45586","Ckroppenstedtii_DSM44385","Ckutscheri_DSM20755","Clactis_RW25","Cmustelae_DSM45274","Cpseudotuberculosis_31","Cpseudotuberculosis_ATCC19410","Crouxii_FRC0190","Csilvaticum_KL0182","Culcerans_NCTC12077","Culcerans_NCTC7910","Cvitaeruminis_DSM20294"	999	0.146824	2.63429	1	0.148221	2.638	2308	0
ERS451417_00534	1717.62.peg.538	NA	NA	NA	0.5945	3	Cbelfantii_FRC0043,"Cdiphtheriae_NCTC11397","Crouxii_FRC0190"	0.741972	0.297183	7.1581	0.5761	0.29892	6.78477	2178	12	1. 0.40113;2. 36;3. 106;4. 105;5. 36;6. 106;7. 36;8. 106;9. 67;10. I;11. ATT	1. 0.70704;2. 42;3. 124;4. 111;5. 42;6. 124;7. 42;8. 124;9. 85;10. P;11. CCA	1. 0.4727;2. 48;3. 142;4. 117;5. 48;6. 142;7. 48;8. 142;9. 103;10. P;11. CCG	1. 0.46879;2. 63;3. 187;4. 132;5. 63;6. 187;7. 63;8. 187;9. 148;10. A;11. GCC	1. 0.50569;2. 72;3. 214;4. 141;5. 72;6. 214;7. 72;8. 214;9. 175;10. A;11. GCA	1. 0.48618;2. 76;3. 226;4. 145;5. 76;6. 226;7. 76;8. 226;9. 187;10. G;11. GGT	1. 0.47783;2. 85;3. 253;4. 154;5. 85;6. 253;7. 85;8. 253;9. 214;10. G;11. GGC	1. 0.45132;2. 98;3. 292;4. 167;5. 98;6. 292;7. 98;8. 292;9. 253;10. G;11. GGA	1. 0.48685;2. 99;3. 295;4. 168;5. 99;6. 295;7. 99;8. 295;9. 256;10. G;11. GGG	1. 0.47883;2. 109;3. 325;4. 178;5. 109;6. 325;7. 109;8. 325;9. 286;10. Q;11. CAG	1. 0.4428;2. 119;3. 355;4. 197;5. 119;6. 355;7. 119;8. 355;9. 316;10. T;11. ACA	1. 0.44582;2. 181;3. 541;4. 268;5. 181;6. 541;7. 181;8. 541;9. 502;10. G;11. GGG
ERS451417_00065	1717.62.peg.61	NA	NA	NA	0.6006	4	Cbelfantii_FRC0043,"Cdiphtheriae_NCTC11397","Crouxii_FRC0190","Csimulans_PES1"	1	0.427639	4.87959	0.431384	0.431384	4.89249	256	0
ERS451417_00915	1717.62.peg.922	NA	NA	NA	0.625	19	Catypicum_R2070,"Cbelfantii_FRC0043","Ccamporealensis_DSM44610","Cdiphtheriae_NCTC11397","Cepidermidicanis_DSM45586","Cfalsenii_DSM44353","Cglycinophilum_AJ3170","Cjeikeium_K41","Ckroppenstedtii_DSM44385","Clactis_RW25","Cpseudotuberculosis_31","Cpseudotuberculosis_ATCC19410","Crouxii_FRC0190","Csilvaticum_KL0182","Csimulans_PES1","Culcerans_NCTC12077","Culcerans_NCTC7910","Cuterequi_DSM45634","C…	0.161301	0.161301	1.77439	0.165046	0.165046	1.77658	2306	0
ERS451417_00538	1717.62.peg.542	NA	NA	NA	0.628	4	Cbelfantii_FRC0043,"Cdiphtheriae_NCTC11397","Cepidermidicanis_DSM45586","Crouxii_FRC0190"	0.191147	0.157304	2.37807	0.159638	0.159609	2.3804	2	6	1. 0.51626;2. 10;3. 28;4. 48;5. 10;6. 28;7. 10;8. 28;9. 28;10. T;11. ACG	1. 0.50391;2. 34;3. 100;4. 72;5. 34;6. 100;7. 34;8. 100;9. 100;10. I;11. ATC	1. 0.62515;2. 206;3. 616;4. 247;5. 206;6. 616;7. 206;8. 616;9. 616;10. A;11. GCA	1. 0.53695;2. 208;3. 622;4. 249;5. 208;6. 622;7. 208;8. 622;9. 622;10. H;11. CAC	1. 0.44307;2. 459;3. 1375;4. 798;5. 471;6. 1411;7. 497;8. 1489;9. 1171;10. L;11. CTA	1. 0.65623;2. 469;3. 1405;4. 808;5. 481;6. 1441;7. 509;8. 1525;9. 1201;10. T;11. ACT
ERS451417_00010	1717.62.peg.11	NA	NA	NA	0.6603	27	Catypicum_R2070,"Caurimucosum_ATCC700975","Cbelfantii_FRC0043","Ccallunae_DSM20147","Ccamporealensis_DSM44610","Cdeserti_GIMN1010","Cdiphtheriae_NCTC11397","Cdoosanense_DSM45436","Cefficiens_YS314","Cepidermidicanis_DSM45586","Cglutamicum_ATCC13032","Chalotolerans_YIM70093","Chumireducens_DSM45392","Ckutscheri_DSM20755","Cmarinum_DSM44953","Cmaris_DSM45190","Cmustelae_DSM45274","Cpseudotuberculos…	0.330445	0.158928	1.96879	0.160567	0.160567	1.96705	2	1	1. 0.69873;2. 14;3. 40;4. 151;5. 15;6. 43;7. 15;8. 43;9. 16;10. V;11. GTC
ERS451417_00013	1717.62.peg.12	NA	NA	NA	0.7066	8	Cbelfantii_FRC0043,"Cdiphtheriae_NCTC11397","Chalotolerans_YIM70093","Chumireducens_DSM45392","Cmarinum_DSM44953","Crouxii_FRC0190","Ctestudinoris_DSM44614","Cvitaeruminis_DSM20294"	0.293958	0.241091	2.01607	0.24227	0.242242	2.01715	2	1	1. 0.69917;2. 48;3. 142;4. 56;5. 48;6. 142;7. 48;8. 142;9. 124;10. V;11. GTA
ERS451417_00130	1717.62.peg.129	NA	NA	NA	0.7104	3	Cbelfantii_FRC0043,"Cdiphtheriae_NCTC11397","Crouxii_FRC0190"	0.341509	0.26489	4.91874	0.28961	0.2818	4.88407	130	2	1. 0.6241;2. 125;3. 373;4. 222;5. 179;6. 535;7. 179;8. 535;9. 373;10. A;11. GCA	1. 0.41774;2. 132;3. 394;4. 229;5. 186;6. 556;7. 186;8. 556;9. 394;10. S;11. TCA
ERS451417_00625	1717.62.peg.629	NA	NA	NA	0.7115	3	Cbelfantii_FRC0043,"Cdiphtheriae_NCTC11397","Crouxii_FRC0190"	1.25262	0.416472	5.14771	1	0.423838	5.14745	128	19	1. 0.73573;2. 5;3. 13;4. 10;5. 5;6. 13;7. 5;8. 13;9. 7;10. N;11. AAC	1. 0.42044;2. 60;3. 178;4. 65;5. 60;6. 178;7. 60;8. 178;9. 172;10. A;11. GCT	1. 0.76286;2. 62;3. 184;4. 67;5. 62;6. 184;7. 62;8. 184;9. 178;10. S;11. AGC	1. 0.78765;2. 67;3. 199;4. 72;5. 67;6. 199;7. 67;8. 199;9. 193;10. K;11. AAA	1. 0.61435;2. 69;3. 205;4. 74;5. 69;6. 205;7. 69;8. 205;9. 199;10. A;11. GCC	1. 0.46387;2. 102;3. 304;4. 107;5. 102;6. 304;7. 102;8. 304;9. 298;10. R;11. CGG	1. 0.7461;2. 110;3. 328;4. 115;5. 110;6. 328;7. 110;8. 328;9. 322;10. Q;11. CAG	1. 0.78063;2. 151;3. 451;4. 190;5. 151;6. 451;7. 151;8. 451;9. 445;10. S;11. AGC	1. 0.682;2. 153;3. 457;4. 192;5. 153;6. 457;7. 153;8. 457;9. 451;10. P;11. CCT	1. 0.73465;2. 158;3. 472;4. 197;5. 158;6. 472;7. 158;8. 472;9. 466;10. T;11. ACG	1. 0.75862;2. 163;3. 487;4. 202;5. 163;6. 487;7. 163;8. 487;9. 481;10. G;11. GGA	1. 0.77132;2. 186;3. 556;4. 225;5. 186;6. 556;7. 186;8. 556;9. 550;10. A;11. GCT	1. 0.68958;2. 215;3. 643;4. 254;5. 215;6. 643;7. 215;8. 643;9. 637;10. A;11. GCT	1. 0.68131;2. 217;3. 649;4. 259;5. 217;6. 649;7. 217;8. 649;9. 643;10. A;11. GCA	1. 0.75862;2. 243;3. 727;4. 285;5. 243;6. 727;7. 243;8. 727;9. 721;10. G;11. GGA	1. 0.69276;2. 251;3. 751;4. 293;5. 251;6. 751;7. 251;8. 751;9. 745;10. A;11. GCT	1. 0.72789;2. 252;3. 754;4. 294;5. 252;6. 754;7. 252;8. 754;9. 748;10. E;11. GAA	1. 0.73282;2. 259;3. 775;4. 303;5. 261;6. 781;7. 261;8. 781;9. 769;10. D;11. GAT	1. 0.69609;2. 282;3. 844;4. 326;5. 284;6. 850;7. 284;8. 850;9. 838;10. A;11. GCG
ERS451417_00889	1717.62.peg.895	NA	NA	NA	0.7531	6	Cbelfantii_FRC0043,"Cdiphtheriae_NCTC11397","Cpseudotuberculosis_ATCC19410","Crouxii_FRC0190","Csilvaticum_KL0182","Culcerans_NCTC12077"	999	0.211722	2.92688	0.329637	0.218661	2.90726	260	0
ERS451417_00373	1717.62.peg.372	NA	NA	NA	0.7724	4	Cdiphtheriae_NCTC11397,"Cpseudotuberculosis_ATCC19410","Crouxii_FRC0190","Culcerans_NCTC12077"	0.437332	0.301436	3.57885	0.36879	0.301092	3.53354	2	1	1. 0.75422;2. 284;3. 850;4. 311;5. 307;6. 919;7. 313;8. 937;9. 799;10. A;11. GCG
ERS451417_00379	1717.62.peg.379	NA	NA	NA	0.8049	3	Cdiphtheriae_NCTC11397,"Crouxii_FRC0190","Csimulans_PES1"	0.583396	0.310414	5.4366	0.401337	0.309279	5.26262	130	1	1. 0.68724;2. 74;3. 220;4. 74;5. 74;6. 220;7. 74;8. 220;9. 220;10. E;11. GAA
ERS451417_00972	1717.62.peg.980	NA	NA	NA	0.817	4	Cbelfantii_FRC0043,"Cdiphtheriae_NCTC11397","Clactis_RW25","Crouxii_FRC0190"	57.1235	0.0808354	3.41349	1	0.0818993	3.40482	256	0
ERS451417_01244	1717.62.peg.1252	NA	NA	NA	0.8477	16	Cbelfantii_FRC0043,"Ccallunae_DSM20147","Cdeserti_GIMN1010","Cdiphtheriae_NCTC11397","Cefficiens_YS314","Cglutamicum_ATCC13032","Chalotolerans_YIM70093","Chumireducens_DSM45392","Cmarinum_DSM44953","Cpseudotuberculosis_31","Cpseudotuberculosis_ATCC19410","Crouxii_FRC0190","Csilvaticum_KL0182","Culcerans_NCTC12077","Culcerans_NCTC7910","Cvitaeruminis_DSM20294"	0.74365	0.325807	1.6845	0.975554	0.325624	1.68438	2	4	1. 0.74952;2. 154;3. 460;4. 194;5. 164;6. 490;7. 170;8. 508;9. 355;10. A;11. GCC	1. 0.78357;2. 257;3. 769;4. 318;5. 274;6. 820;7. 284;8. 850;9. 616;10. A;11. GCA	1. 0.56213;2. 263;3. 787;4. 324;5. 280;6. 838;7. 290;8. 868;9. 634;10. P;11. CCA	1. 0.40878;2. 264;3. 790;4. 325;5. 281;6. 841;7. 291;8. 871;9. 637;10. D;11. GAC
ERS451417_00498	1717.62.peg.502	NA	NA	NA	0.9368	3	Cbelfantii_FRC0043,"Cdiphtheriae_NCTC11397","Crouxii_FRC0190"	0.158827	0.08864		0.145158	0.08882		130	1	1. 0.5961;2. 38;3. 112;4. 66;5. 38;6. 112;7. 38;8. 112;9. 112;10. P;11. CCA
ERS451417_00579	1717.62.peg.582	NA	NA	NA	0.9641	33	Cargentoratense_DSM44202,"Catypicum_R2070","Caurimucosum_ATCC700975","Cbelfantii_FRC0043","Ccallunae_DSM20147","Ccamporealensis_DSM44610","Cdeserti_GIMN1010","Cdiphtheriae_NCTC11397","Cdoosanense_DSM45436","Cefficiens_YS314","Cepidermidicanis_DSM45586","Cglutamicum_ATCC13032","Cglycinophilum_AJ3170","Chalotolerans_YIM70093","Chumireducens_DSM45392","Cimitans_DSM44264","Ckroppenstedtii_DSM44385","…	0.159291	0.158197	2.0787	0.158205	0.158205	2.07867	2	4	1. 0.46992;2. 123;3. 367;4. 129;5. 129;6. 385;7. 172;8. 514;9. 316;10. S;11. TCA	1. 0.43115;2. 159;3. 475;4. 165;5. 165;6. 493;7. 208;8. 622;9. 424;10. A;11. GCA	1. 0.50981;2. 672;3. 2014;4. 694;5. 694;6. 2080;7. 752;8. 2254;9. 1903;10. T;11. ACC	1. 0.46582;2. 1120;3. 3358;4. 1151;5. 1151;6. 3451;7. 1230;8. 3688;9. 3109;10. I;11. ATC
ERS451417_00866	1717.62.peg.871	NA	NA	NA	0.9844	3	Cdiphtheriae_NCTC11397,"Crouxii_FRC0190","Culcerans_NCTC12077"	0.248273	0.248154	2.42763	0.473499	0.24803	2.42784	386	0
ERS451417_00766	1717.62.peg.771	NA	NA	NA	0.986	9	Cbelfantii_FRC0043,"Cdiphtheriae_NCTC11397","Cpseudotuberculosis_31","Cpseudotuberculosis_ATCC19410","Crouxii_FRC0190","Csilvaticum_KL0182","Culcerans_NCTC12077","Culcerans_NCTC7910","Cvitaeruminis_DSM20294"	0.342685	0.342666	3.0315	0.342666	0.342657	3.0315	2	1	1. 0.45267;2. 107;3. 319;4. 199;5. 117;6. 349;7. 120;8. 358;9. 292;10. G;11. GGA
ERS451417_00875	1717.62.peg.881	NA	NA	NA	0.9897	24	Catypicum_R2070,"Cbelfantii_FRC0043","Ccallunae_DSM20147","Ccamporealensis_DSM44610","Cdeserti_GIMN1010","Cdiphtheriae_NCTC11397","Cdoosanense_DSM45436","Cefficiens_YS314","Cepidermidicanis_DSM45586","Chalotolerans_YIM70093","Chumireducens_DSM45392","Cimitans_DSM44264","Ckutscheri_DSM20755","Cmarinum_DSM44953","Cmaris_DSM45190","Cmustelae_DSM45274","Cpseudotuberculosis_31","Cpseudotuberculosis_AT…	0.362968	0.246678	1.631	0.360557	0.246696	1.63099	3074	1	1. 0.80063;2. 17;3. 49;4. 42;5. 27;6. 79;7. 57;8. 169;9. 16;10. A;11. GCG
ERS451417_00027	1717.62.peg.24	NA	NA	NA	0.9908	32	Cargentoratense_DSM44202,"Catypicum_R2070","Caurimucosum_ATCC700975","Cbelfantii_FRC0043","Ccallunae_DSM20147","Cdeserti_GIMN1010","Cdiphtheriae_NCTC11397","Cdoosanense_DSM45436","Cefficiens_YS314","Cfalsenii_DSM44353","Cglutamicum_ATCC13032","Cglycinophilum_AJ3170","Chalotolerans_YIM70093","Cjeikeium_K41","Ckroppenstedtii_DSM44385","Ckutscheri_DSM20755","Cmustelae_DSM45274","Cpseudotuberculosis_…	0.205182	0.205182	1.94021	0.205191	0.205182	1.94021	258	0
ERS451417_01169	1717.62.peg.1180	NA	NA	NA	0.9909	39	Cargentoratense_DSM44202,"Catypicum_R2070","Caurimucosum_ATCC700975","Cbelfantii_FRC0043","Ccallunae_DSM20147","Ccamporealensis_DSM44610","Cdeserti_GIMN1010","Cdiphtheriae_NCTC11397","Cdoosanense_DSM45436","Cefficiens_YS314","Cepidermidicanis_DSM45586","Cfalsenii_DSM44353","Cglutamicum_ATCC13032","Cglycinophilum_AJ3170","Chalotolerans_YIM70093","Chumireducens_DSM45392","Cimitans_DSM44264","Cjeike…	0.184102	0.184093	1.52001	0.184112	0.184093	1.51999	2	2	1. 0.48985;2. 18;3. 52;4. 67;5. 67;6. 199;7. 99;8. 295;9. 43;10. D;11. GAC	1. 0.5579;2. 207;3. 619;4. 267;5. 267;6. 799;7. 317;8. 949;9. 583;10. V;11. GTA
ERS451417_00236	1717.62.peg.232	NA	NA	NA	0.9919	33	Catypicum_R2070,"Caurimucosum_ATCC700975","Cbelfantii_FRC0043","Ccamporealensis_DSM44610","Cdeserti_GIMN1010","Cdiphtheriae_NCTC11397","Cdoosanense_DSM45436","Cefficiens_YS314","Cepidermidicanis_DSM45586","Cglutamicum_ATCC13032","Cglycinophilum_AJ3170","Chalotolerans_YIM70093","Chumireducens_DSM45392","Cimitans_DSM44264","Ckroppenstedtii_DSM44385","Ckutscheri_DSM20755","Cmarinum_DSM44953","Cmaris…	0.233221	0.233221	1.83787	0.233221	0.233221	1.83787	2050	1	1. 0.55164;2. 65;3. 193;4. 80;5. 75;6. 223;7. 82;8. 244;9. 151;10. V;11. GTG
ERS451417_00947	1717.62.peg.954	NA	NA	NA	0.9919	39	Cargentoratense_DSM44202,"Catypicum_R2070","Caurimucosum_ATCC700975","Cbelfantii_FRC0043","Ccallunae_DSM20147","Ccamporealensis_DSM44610","Cdeserti_GIMN1010","Cdiphtheriae_NCTC11397","Cdoosanense_DSM45436","Cefficiens_YS314","Cepidermidicanis_DSM45586","Cfalsenii_DSM44353","Cglutamicum_ATCC13032","Cglycinophilum_AJ3170","Chalotolerans_YIM70093","Chumireducens_DSM45392","Cimitans_DSM44264","Cjeike…	0.157254	0.157254	1.79401	0.157244	0.157244	1.794	2	3	1. 0.40467;2. 40;3. 118;4. 54;5. 54;6. 160;7. 59;8. 175;9. 103;10. E;11. GAA	1. 0.44584;2. 130;3. 388;4. 152;5. 152;6. 454;7. 157;8. 469;9. 361;10. L;11. CTT	1. 0.46287;2. 275;3. 823;4. 297;5. 297;6. 889;7. 302;8. 904;9. 772;10. T;11. ACT
ERS451417_00988	1717.62.peg.999	NA	NA	NA	0.9922	39	Cargentoratense_DSM44202,"Catypicum_R2070","Caurimucosum_ATCC700975","Cbelfantii_FRC0043","Ccallunae_DSM20147","Ccamporealensis_DSM44610","Cdeserti_GIMN1010","Cdiphtheriae_NCTC11397","Cdoosanense_DSM45436","Cefficiens_YS314","Cepidermidicanis_DSM45586","Cfalsenii_DSM44353","Cglutamicum_ATCC13032","Cglycinophilum_AJ3170","Chalotolerans_YIM70093","Chumireducens_DSM45392","Cimitans_DSM44264","Cjeike…	0.215249	0.215222	1.60315	0.33258	0.215222	1.60315	258	0
ERS451417_00804	1717.62.peg.811	NA	NA	NA	0.993	39	Cargentoratense_DSM44202,"Catypicum_R2070","Caurimucosum_ATCC700975","Cbelfantii_FRC0043","Ccallunae_DSM20147","Ccamporealensis_DSM44610","Cdeserti_GIMN1010","Cdiphtheriae_NCTC11397","Cdoosanense_DSM45436","Cefficiens_YS314","Cepidermidicanis_DSM45586","Cfalsenii_DSM44353","Cglutamicum_ATCC13032","Cglycinophilum_AJ3170","Chalotolerans_YIM70093","Chumireducens_DSM45392","Cimitans_DSM44264","Cjeike…	0.204195	0.204195	1.78088	0.204195	0.204195	1.78089	3074	1	1. 0.46813;2. 317;3. 949;4. 348;5. 348;6. 1042;7. 431;8. 1291;9. 637;10. D;11. GAC
ERS451417_00951	1717.62.peg.958	NA	NA	NA	0.993	39	Cargentoratense_DSM44202,"Catypicum_R2070","Caurimucosum_ATCC700975","Cbelfantii_FRC0043","Ccallunae_DSM20147","Ccamporealensis_DSM44610","Cdeserti_GIMN1010","Cdiphtheriae_NCTC11397","Cdoosanense_DSM45436","Cefficiens_YS314","Cepidermidicanis_DSM45586","Cfalsenii_DSM44353","Cglutamicum_ATCC13032","Cglycinophilum_AJ3170","Chalotolerans_YIM70093","Chumireducens_DSM45392","Cimitans_DSM44264","Cjeike…	0.104202	0.104202	1.59653	0.104202	0.104202	1.59654	258	0
ERS451417_00482	1717.62.peg.485	NA	NA	NA	0.9931	39	Cargentoratense_DSM44202,"Catypicum_R2070","Caurimucosum_ATCC700975","Cbelfantii_FRC0043","Ccallunae_DSM20147","Ccamporealensis_DSM44610","Cdeserti_GIMN1010","Cdiphtheriae_NCTC11397","Cdoosanense_DSM45436","Cefficiens_YS314","Cepidermidicanis_DSM45586","Cfalsenii_DSM44353","Cglutamicum_ATCC13032","Cglycinophilum_AJ3170","Chalotolerans_YIM70093","Chumireducens_DSM45392","Cimitans_DSM44264","Cjeike…	0.542299	0.200867	2.12316	1	0.200867	2.12429	2306	0
ERS451417_00739	1717.62.peg.742	NA	NA	NA	0.9937	39	Cargentoratense_DSM44202,"Catypicum_R2070","Caurimucosum_ATCC700975","Cbelfantii_FRC0043","Ccallunae_DSM20147","Ccamporealensis_DSM44610","Cdeserti_GIMN1010","Cdiphtheriae_NCTC11397","Cdoosanense_DSM45436","Cefficiens_YS314","Cepidermidicanis_DSM45586","Cfalsenii_DSM44353","Cglutamicum_ATCC13032","Cglycinophilum_AJ3170","Chalotolerans_YIM70093","Chumireducens_DSM45392","Cimitans_DSM44264","Cjeike…	0.177449	0.177449	1.79294	0.177449	0.177449	1.79294	258	0
ERS451417_00891	1717.62.peg.897	NA	NA	NA	0.9961	38	Cargentoratense_DSM44202,"Catypicum_R2070","Caurimucosum_ATCC700975","Cbelfantii_FRC0043","Ccallunae_DSM20147","Ccamporealensis_DSM44610","Cdeserti_GIMN1010","Cdiphtheriae_NCTC11397","Cdoosanense_DSM45436","Cefficiens_YS314","Cepidermidicanis_DSM45586","Cfalsenii_DSM44353","Cglutamicum_ATCC13032","Cglycinophilum_AJ3170","Chalotolerans_YIM70093","Chumireducens_DSM45392","Cimitans_DSM44264","Cjeike…	0.217167	0.217167	1.97147	0.217167	0.217167	1.97147	2050	1	1. 0.4916;2. 180;3. 538;4. 192;5. 192;6. 574;7. 204;8. 610;9. 319;10. V;11. GTG
ERS451417_01201	1717.62.peg.1209	NA	NA	NA	0.9961	26	Caurimucosum_ATCC700975,"Cbelfantii_FRC0043","Ccallunae_DSM20147","Ccamporealensis_DSM44610","Cdeserti_GIMN1010","Cdiphtheriae_NCTC11397","Cefficiens_YS314","Cepidermidicanis_DSM45586","Cglutamicum_ATCC13032","Chalotolerans_YIM70093","Chumireducens_DSM45392","Cimitans_DSM44264","Cmarinum_DSM44953","Cmaris_DSM45190","Cmustelae_DSM45274","Cpseudotuberculosis_31","Cpseudotuberculosis_ATCC19410","Cri…	0.13699	0.13699	1.70632	0.13699	0.13699	1.70632	3330	0
ERS451417_00285	1717.62.peg.286	NA	NA	NA	0.9964	29	Cargentoratense_DSM44202,"Caurimucosum_ATCC700975","Cbelfantii_FRC0043","Ccallunae_DSM20147","Ccamporealensis_DSM44610","Cdeserti_GIMN1010","Cdiphtheriae_NCTC11397","Cdoosanense_DSM45436","Cefficiens_YS314","Cglutamicum_ATCC13032","Chumireducens_DSM45392","Cimitans_DSM44264","Ckutscheri_DSM20755","Cmarinum_DSM44953","Cmaris_DSM45190","Cmustelae_DSM45274","Cpseudotuberculosis_31","Cpseudotuberculo…	0.246034	0.246034	1.78089	0.246034	0.246034	1.78089	3074	4	1. 0.50864;2. 19;3. 55;4. 32;5. 26;6. 76;7. 42;8. 124;9. 31;10. H;11. CAT	1. 0.5033;2. 54;3. 160;4. 72;5. 66;6. 196;7. 88;8. 262;9. 97;10. A;11. GCT	1. 0.45287;2. 85;3. 253;4. 107;5. 97;6. 289;7. 119;8. 355;9. 190;10. L;11. CTG	1. 0.54802;2. 174;3. 520;4. 204;5. 192;6. 574;7. 215;8. 643;9. 337;10. P;11. CCG
ERS451417_00627	1717.62.peg.631	NA	NA	NA	0.9968	27	Cargentoratense_DSM44202,"Catypicum_R2070","Cbelfantii_FRC0043","Ccallunae_DSM20147","Cdeserti_GIMN1010","Cdiphtheriae_NCTC11397","Cdoosanense_DSM45436","Cefficiens_YS314","Cfalsenii_DSM44353","Cglutamicum_ATCC13032","Cglycinophilum_AJ3170","Chalotolerans_YIM70093","Cjeikeium_K41","Ckutscheri_DSM20755","Clactis_RW25","Cmaris_DSM45190","Cmustelae_DSM45274","Cpseudotuberculosis_31","Cpseudotubercul…	0.147485	0.147485	1.66684	0.147475	0.147475	1.66684	258	0
ERS451417_01243	1717.62.peg.1251	NA	NA	NA	0.9968	8	Cbelfantii_FRC0043,"Cdiphtheriae_NCTC11397","Cmustelae_DSM45274","Cpseudotuberculosis_ATCC19410","Crouxii_FRC0190","Csilvaticum_KL0182","Culcerans_NCTC12077","Culcerans_NCTC7910"	0.467905	0.219553	2.67854	0.223589	0.219563	2.67854	258	0
ERS451417_00214	1717.62.peg.211	NA	NA	NA	0.997	6	Cbelfantii_FRC0043,"Cdiphtheriae_NCTC11397","Cmustelae_DSM45274","Cpseudotuberculosis_31","Cpseudotuberculosis_ATCC19410","Crouxii_FRC0190"	0.0989836	0.0989836	3.39093	0.0989836	0.0989836	3.39092	2	1	1. 0.51285;2. 27;3. 79;4. 514;5. 27;6. 79;7. 27;8. 79;9. 79;10. R;11. CGC
ERS451417_01039	1717.62.peg.1049	NA	NA	NA	0.9972	8	Cbelfantii_FRC0043,"Cdiphtheriae_NCTC11397","Cpseudotuberculosis_31","Cpseudotuberculosis_ATCC19410","Crouxii_FRC0190","Csilvaticum_KL0182","Culcerans_NCTC12077","Culcerans_NCTC7910"	0.112107	0.112107	3.34995	0.114268	0.112107	3.34994	258	0
ERS451417_00187	1717.62.peg.183	NA	NA	NA	0.9972	10	Cbelfantii_FRC0043,"Cdiphtheriae_NCTC11397","Cepidermidicanis_DSM45586","Cimitans_DSM44264","Cjeikeium_K41","Cmaris_DSM45190","Crouxii_FRC0190","Csilvaticum_KL0182","Culcerans_NCTC12077","Culcerans_NCTC7910"	0.142907	0.142907	2.22376	0.142907	0.142907	2.22386	2050	1	1. 0.49671;2. 70;3. 208;4. 101;5. 75;6. 223;7. 110;8. 328;9. 106;10. V;11. GTA
ERS451417_01007	1717.62.peg.1018	NA	NA	NA	0.9975	13	Caurimucosum_ATCC700975,"Cbelfantii_FRC0043","Ccallunae_DSM20147","Cdiphtheriae_NCTC11397","Chalotolerans_YIM70093","Cmarinum_DSM44953","Cpseudotuberculosis_31","Cpseudotuberculosis_ATCC19410","Crouxii_FRC0190","Csilvaticum_KL0182","Csingulare_IBSB52218","Culcerans_NCTC12077","Culcerans_NCTC7910"	0.317674	0.113402	2.20936	0.317684	0.113402	2.20936	1026	4	1. 0.75574;2. 43;3. 127;4. 71;5. 70;6. 208;7. 85;8. 253;9. 103;10. I;11. ATC	1. 0.81587;2. 83;3. 247;4. 111;5. 110;6. 328;7. 125;8. 373;9. 223;10. V;11. GTG	1. 0.83145;2. 88;3. 262;4. 117;5. 115;6. 343;7. 130;8. 388;9. 238;10. S;11. TCA	1. 0.79737;2. 115;3. 343;4. 144;5. 142;6. 424;7. 157;8. 469;9. 316;10. T;11. ACT
ERS451417_00064	1717.62.peg.60	NA	NA	NA	0.9975	10	Cbelfantii_FRC0043,"Cdiphtheriae_NCTC11397","Cimitans_DSM44264","Crouxii_FRC0190","Csilvaticum_KL0182","Csimulans_PES1","Csingulare_IBSB52218","Culcerans_NCTC12077","Culcerans_NCTC7910","Cureicelerivorans_IMMIBRIV2301"	0.268724	0.267943	1.78608	0.273685	0.267943	1.78617	258	0
ERS451417_01000	1717.62.peg.1011	NA	NA	NA	0.9977	24	Cbelfantii_FRC0043,"Ccallunae_DSM20147","Cdeserti_GIMN1010","Cdiphtheriae_NCTC11397","Cdoosanense_DSM45436","Cefficiens_YS314","Cglutamicum_ATCC13032","Cglycinophilum_AJ3170","Chalotolerans_YIM70093","Chumireducens_DSM45392","Ckroppenstedtii_DSM44385","Clactis_RW25","Cmarinum_DSM44953","Cmaris_DSM45190","Cpseudotuberculosis_31","Cpseudotuberculosis_ATCC19410","Crouxii_FRC0190","Csilvaticum_KL0182…	0.148208	0.148208	1.65394	0.148208	0.148208	1.65394	2	3	1. 0.44138;2. 65;3. 193;4. 121;5. 117;6. 349;7. 167;8. 499;9. 130;10. I;11. ATT	1. 0.55772;2. 135;3. 403;4. 193;5. 187;6. 559;7. 237;8. 709;9. 340;10. L;11. CTA	1. 0.47391;2. 260;3. 778;4. 332;5. 321;6. 961;7. 377;8. 1129;9. 685;10. G;11. GGG
ERS451417_00715	1717.62.peg.720	NA	NA	NA	0.9977	16	Cargentoratense_DSM44202,"Cbelfantii_FRC0043","Cdeserti_GIMN1010","Cdiphtheriae_NCTC11397","Cefficiens_YS314","Cepidermidicanis_DSM45586","Cglutamicum_ATCC13032","Ckroppenstedtii_DSM44385","Clactis_RW25","Cmustelae_DSM45274","Cpseudotuberculosis_31","Cpseudotuberculosis_ATCC19410","Crouxii_FRC0190","Culcerans_NCTC12077","Culcerans_NCTC7910","Cvitaeruminis_DSM20294"	0.163115	0.163115	2.1137	0.163115	0.163115	2.1137	2306	0
ERS451417_00735	1717.62.peg.738	NA	NA	NA	0.9977	9	Catypicum_R2070,"Cbelfantii_FRC0043","Cdiphtheriae_NCTC11397","Cpseudotuberculosis_31","Cpseudotuberculosis_ATCC19410","Crouxii_FRC0190","Csilvaticum_KL0182","Culcerans_NCTC12077","Culcerans_NCTC7910"	0.198245	0.198245	2.77053	0.198245	0.198245	2.77054	258	0
ERS451417_00818	1717.62.peg.824	NA	NA	NA	0.9977	39	Cargentoratense_DSM44202,"Catypicum_R2070","Caurimucosum_ATCC700975","Cbelfantii_FRC0043","Ccallunae_DSM20147","Ccamporealensis_DSM44610","Cdeserti_GIMN1010","Cdiphtheriae_NCTC11397","Cdoosanense_DSM45436","Cefficiens_YS314","Cepidermidicanis_DSM45586","Cfalsenii_DSM44353","Cglutamicum_ATCC13032","Cglycinophilum_AJ3170","Chalotolerans_YIM70093","Chumireducens_DSM45392","Cimitans_DSM44264","Cjeike…	0.20859	0.20859	1.88026	0.20858	0.20858	1.88025	258	0
ERS451417_00989	1717.62.peg.1000	NA	NA	NA	0.998	39	Cargentoratense_DSM44202,"Catypicum_R2070","Caurimucosum_ATCC700975","Cbelfantii_FRC0043","Ccallunae_DSM20147","Ccamporealensis_DSM44610","Cdeserti_GIMN1010","Cdiphtheriae_NCTC11397","Cdoosanense_DSM45436","Cefficiens_YS314","Cepidermidicanis_DSM45586","Cfalsenii_DSM44353","Cglutamicum_ATCC13032","Cglycinophilum_AJ3170","Chalotolerans_YIM70093","Chumireducens_DSM45392","Cimitans_DSM44264","Cjeike…	0.12504	0.12504	1.73471	0.12504	0.12504	1.73471	2	2	1. 0.49941;2. 351;3. 1051;4. 361;5. 361;6. 1081;7. 402;8. 1204;9. 961;10. T;11. ACG	1. 0.47261;2. 434;3. 1300;4. 444;5. 444;6. 1330;7. 485;8. 1453;9. 1210;10. L;11. TTG
ERS451417_00457	1717.62.peg.461	NA	NA	NA	0.998	39	Cargentoratense_DSM44202,"Catypicum_R2070","Caurimucosum_ATCC700975","Cbelfantii_FRC0043","Ccallunae_DSM20147","Ccamporealensis_DSM44610","Cdeserti_GIMN1010","Cdiphtheriae_NCTC11397","Cdoosanense_DSM45436","Cefficiens_YS314","Cepidermidicanis_DSM45586","Cfalsenii_DSM44353","Cglutamicum_ATCC13032","Cglycinophilum_AJ3170","Chalotolerans_YIM70093","Chumireducens_DSM45392","Cimitans_DSM44264","Cjeike…	0.534954	0.202454	1.97889	0.339256	0.202454	1.97889	258	0
ERS451417_00309	1717.62.peg.310	NA	NA	NA	0.998	27	Cargentoratense_DSM44202,"Catypicum_R2070","Cbelfantii_FRC0043","Ccallunae_DSM20147","Cdeserti_GIMN1010","Cdiphtheriae_NCTC11397","Cdoosanense_DSM45436","Cefficiens_YS314","Cfalsenii_DSM44353","Cglutamicum_ATCC13032","Cglycinophilum_AJ3170","Chumireducens_DSM45392","Cjeikeium_K41","Ckutscheri_DSM20755","Clactis_RW25","Cmarinum_DSM44953","Cmaris_DSM45190","Cmustelae_DSM45274","Cpseudotuberculosis_…	0.134592	0.134592	1.87366	0.134592	0.134592	1.87367	2	1	1. 0.54129;2. 205;3. 613;4. 255;5. 255;6. 763;7. 278;8. 832;9. 538;10. I;11. ATC
ERS451417_00865	1717.62.peg.870	NA	NA	NA	0.9984	3	Cdiphtheriae_NCTC11397,"Crouxii_FRC0190","Csimulans_PES1"	0.291567	0.291567	1.7198	0.291567	0.291567	1.7198	386	0
ERS451417_00526	1717.62.peg.529	NA	NA	NA	0.9984	39	Cargentoratense_DSM44202,"Catypicum_R2070","Caurimucosum_ATCC700975","Cbelfantii_FRC0043","Ccallunae_DSM20147","Ccamporealensis_DSM44610","Cdeserti_GIMN1010","Cdiphtheriae_NCTC11397","Cdoosanense_DSM45436","Cefficiens_YS314","Cepidermidicanis_DSM45586","Cfalsenii_DSM44353","Cglutamicum_ATCC13032","Cglycinophilum_AJ3170","Chalotolerans_YIM70093","Chumireducens_DSM45392","Cimitans_DSM44264","Cjeike…	0.126173	0.126173	2.41436	0.126173	0.126173	2.41435	258	0
ERS451417_00129	1717.62.peg.127	NA	NA	NA	0.9984	39	Cargentoratense_DSM44202,"Catypicum_R2070","Caurimucosum_ATCC700975","Cbelfantii_FRC0043","Ccallunae_DSM20147","Ccamporealensis_DSM44610","Cdeserti_GIMN1010","Cdiphtheriae_NCTC11397","Cdoosanense_DSM45436","Cefficiens_YS314","Cepidermidicanis_DSM45586","Cfalsenii_DSM44353","Cglutamicum_ATCC13032","Cglycinophilum_AJ3170","Chalotolerans_YIM70093","Chumireducens_DSM45392","Cimitans_DSM44264","Cjeike…	0.0977509	0.0977509	1.95401	0.0977509	0.0977509	1.95402	258	0
ERS451417_00986	1717.62.peg.997	NA	NA	NA	0.9984	39	Cargentoratense_DSM44202,"Catypicum_R2070","Caurimucosum_ATCC700975","Cbelfantii_FRC0043","Ccallunae_DSM20147","Ccamporealensis_DSM44610","Cdeserti_GIMN1010","Cdiphtheriae_NCTC11397","Cdoosanense_DSM45436","Cefficiens_YS314","Cepidermidicanis_DSM45586","Cfalsenii_DSM44353","Cglutamicum_ATCC13032","Cglycinophilum_AJ3170","Chalotolerans_YIM70093","Chumireducens_DSM45392","Cimitans_DSM44264","Cjeike…	0.182682	0.182682	1.64048	0.182682	0.182682	1.64048	1026	3	1. 0.40116;2. 17;3. 49;4. 63;5. 63;6. 187;7. 265;8. 793;9. 16;10. E;11. GAA	1. 0.401;2. 294;3. 880;4. 356;5. 356;6. 1066;7. 578;8. 1732;9. 739;10. A;11. GCA	1. 0.45241;2. 391;3. 1171;4. 453;5. 453;6. 1357;7. 675;8. 2023;9. 1030;10. V;11. GTT
ERS451417_00316	1717.62.peg.318	NA	NA	NA	0.9984	4	Cbelfantii_FRC0043,"Cdiphtheriae_NCTC11397","Ckutscheri_DSM20755","Crouxii_FRC0190"	0.237075	0.237075	2.43236	0.237075	0.237075	2.43236	2	1	1. 0.46558;2. 80;3. 238;4. 381;5. 118;6. 352;7. 118;8. 352;9. 226;10. D;11. GAC
ERS451417_00844	1717.62.peg.849	NA	NA	NA	0.9984	13	Cbelfantii_FRC0043,"Cdiphtheriae_NCTC11397","Cefficiens_YS314","Cglutamicum_ATCC13032","Cimitans_DSM44264","Ckutscheri_DSM20755","Cpseudotuberculosis_31","Cpseudotuberculosis_ATCC19410","Crouxii_FRC0190","Csilvaticum_KL0182","Culcerans_NCTC7910","Cureicelerivorans_IMMIBRIV2301","Cvitaeruminis_DSM20294"	0.14264	0.14264	2.1795	0.14264	0.14264	2.1795	258	0
ERS451417_01205	1717.62.peg.1213	NA	NA	NA	0.9989	8	Cbelfantii_FRC0043,"Cdiphtheriae_NCTC11397","Cpseudotuberculosis_31","Cpseudotuberculosis_ATCC19410","Crouxii_FRC0190","Culcerans_NCTC12077","Culcerans_NCTC7910","Cvitaeruminis_DSM20294"	0.11194	0.111911	2.50382	0.113879	0.111911	2.50382	258	0
ERS451417_00758	1717.62.peg.763	NA	NA	NA	0.9989	39	Cargentoratense_DSM44202,"Catypicum_R2070","Caurimucosum_ATCC700975","Cbelfantii_FRC0043","Ccallunae_DSM20147","Ccamporealensis_DSM44610","Cdeserti_GIMN1010","Cdiphtheriae_NCTC11397","Cdoosanense_DSM45436","Cefficiens_YS314","Cepidermidicanis_DSM45586","Cfalsenii_DSM44353","Cglutamicum_ATCC13032","Cglycinophilum_AJ3170","Chalotolerans_YIM70093","Chumireducens_DSM45392","Cimitans_DSM44264","Cjeike…	0.354168	0.117595	2.72259	0.210506	0.117585	2.72259	2306	0
ERS451417_00197	1717.62.peg.194	NA	NA	NA	0.9989	5	Cbelfantii_FRC0043,"Cdiphtheriae_NCTC11397","Crouxii_FRC0190","Culcerans_NCTC12077","Culcerans_NCTC7910"	0.411529	0.411335	3.79573	0.413093	0.411335	3.79573	258	0
ERS451417_00392	1717.62.peg.392	NA	NA	NA	0.9989	39	Cargentoratense_DSM44202,"Catypicum_R2070","Caurimucosum_ATCC700975","Cbelfantii_FRC0043","Ccallunae_DSM20147","Ccamporealensis_DSM44610","Cdeserti_GIMN1010","Cdiphtheriae_NCTC11397","Cdoosanense_DSM45436","Cefficiens_YS314","Cepidermidicanis_DSM45586","Cfalsenii_DSM44353","Cglutamicum_ATCC13032","Cglycinophilum_AJ3170","Chalotolerans_YIM70093","Chumireducens_DSM45392","Cimitans_DSM44264","Cjeike…	0.180765	0.180765	1.70134	0.180765	0.180765	1.70135	258	0
ERS451417_00850	1717.62.peg.855	NA	NA	NA	0.9989	17	Cargentoratense_DSM44202,"Cbelfantii_FRC0043","Ccallunae_DSM20147","Cdeserti_GIMN1010","Cdiphtheriae_NCTC11397","Cefficiens_YS314","Cfalsenii_DSM44353","Cglycinophilum_AJ3170","Chumireducens_DSM45392","Ckroppenstedtii_DSM44385","Ckutscheri_DSM20755","Clactis_RW25","Cmarinum_DSM44953","Crouxii_FRC0190","Cterpenotabidum_Y11","Ctestudinoris_DSM44614","Curealyticum_DSM7109"	0.413074	0.411516	1.47975	0.413844	0.411516	1.47975	258	0
ERS451417_00657	1717.62.peg.662	NA	NA	NA	0.9989	39	Cargentoratense_DSM44202,"Catypicum_R2070","Caurimucosum_ATCC700975","Cbelfantii_FRC0043","Ccallunae_DSM20147","Ccamporealensis_DSM44610","Cdeserti_GIMN1010","Cdiphtheriae_NCTC11397","Cdoosanense_DSM45436","Cefficiens_YS314","Cepidermidicanis_DSM45586","Cfalsenii_DSM44353","Cglutamicum_ATCC13032","Cglycinophilum_AJ3170","Chalotolerans_YIM70093","Chumireducens_DSM45392","Cimitans_DSM44264","Cjeike…	0.151984	0.151984	1.67051	0.151984	0.151984	1.67051	3074	3	1. 0.40811;2. 102;3. 304;4. 117;5. 117;6. 349;7. 189;8. 565;9. 247;10. N;11. AAT	1. 0.46515;2. 180;3. 538;4. 199;5. 199;6. 595;7. 272;8. 814;9. 439;10. T;11. ACA	1. 0.41131;2. 347;3. 1039;4. 369;5. 369;6. 1105;7. 444;8. 1330;9. 904;10. V;11. GTT
ERS451417_00474	1717.62.peg.477	NA	NA	NA	0.9989	39	Cargentoratense_DSM44202,"Catypicum_R2070","Caurimucosum_ATCC700975","Cbelfantii_FRC0043","Ccallunae_DSM20147","Ccamporealensis_DSM44610","Cdeserti_GIMN1010","Cdiphtheriae_NCTC11397","Cdoosanense_DSM45436","Cefficiens_YS314","Cepidermidicanis_DSM45586","Cfalsenii_DSM44353","Cglutamicum_ATCC13032","Cglycinophilum_AJ3170","Chalotolerans_YIM70093","Chumireducens_DSM45392","Cimitans_DSM44264","Cjeike…	0.111791	0.111791	1.89618	0.111791	0.111791	1.89617	258	0
ERS451417_00188	1717.62.peg.184	NA	NA	NA	0.9989	39	Cargentoratense_DSM44202,"Catypicum_R2070","Caurimucosum_ATCC700975","Cbelfantii_FRC0043","Ccallunae_DSM20147","Ccamporealensis_DSM44610","Cdeserti_GIMN1010","Cdiphtheriae_NCTC11397","Cdoosanense_DSM45436","Cefficiens_YS314","Cepidermidicanis_DSM45586","Cfalsenii_DSM44353","Cglutamicum_ATCC13032","Cglycinophilum_AJ3170","Chalotolerans_YIM70093","Chumireducens_DSM45392","Cimitans_DSM44264","Cjeike…	0.147253	0.147253	1.86435	0.147253	0.147253	1.86435	2	1	1. 0.43851;2. 470;3. 1408;4. 497;5. 497;6. 1489;7. 537;8. 1609;9. 1267;10. E;11. GAG
ERS451417_00256	1717.62.peg.251	NA	NA	NA	0.9989	39	Cargentoratense_DSM44202,"Catypicum_R2070","Caurimucosum_ATCC700975","Cbelfantii_FRC0043","Ccallunae_DSM20147","Ccamporealensis_DSM44610","Cdeserti_GIMN1010","Cdiphtheriae_NCTC11397","Cdoosanense_DSM45436","Cefficiens_YS314","Cepidermidicanis_DSM45586","Cfalsenii_DSM44353","Cglutamicum_ATCC13032","Cglycinophilum_AJ3170","Chalotolerans_YIM70093","Chumireducens_DSM45392","Cimitans_DSM44264","Cjeike…	0.132014	0.132014	1.77325	0.132014	0.132014	1.77325	2	1	1. 0.65202;2. 819;3. 2455;4. 912;5. 912;6. 2734;7. 1078;8. 3232;9. 2086;10. E;11. GAA
ERS451417_00467	1717.62.peg.471	NA	NA	NA	0.9989	10	Cbelfantii_FRC0043,"Cdiphtheriae_NCTC11397","Ckutscheri_DSM20755","Cpseudotuberculosis_31","Cpseudotuberculosis_ATCC19410","Crouxii_FRC0190","Csilvaticum_KL0182","Culcerans_NCTC12077","Culcerans_NCTC7910","Cvitaeruminis_DSM20294"	0.0987386	0.0987386	1.8192	0.0987479	0.0987479	1.8192	2	2	1. 0.40642;2. 114;3. 340;4. 125;5. 124;6. 370;7. 141;8. 421;9. 250;10. S;11. TCT	1. 0.40659;2. 319;3. 955;4. 341;5. 329;6. 985;7. 346;8. 1036;9. 865;10. A;11. GCA
ERS451417_00900	1717.62.peg.906	NA	NA	NA	0.9989	39	Cargentoratense_DSM44202,"Catypicum_R2070","Caurimucosum_ATCC700975","Cbelfantii_FRC0043","Ccallunae_DSM20147","Ccamporealensis_DSM44610","Cdeserti_GIMN1010","Cdiphtheriae_NCTC11397","Cdoosanense_DSM45436","Cefficiens_YS314","Cepidermidicanis_DSM45586","Cfalsenii_DSM44353","Cglutamicum_ATCC13032","Cglycinophilum_AJ3170","Chalotolerans_YIM70093","Chumireducens_DSM45392","Cimitans_DSM44264","Cjeike…	0.144599	0.144599	1.71263	0.144599	0.144599	1.71263	2306	0
ERS451417_00336	1717.62.peg.338	NA	NA	NA	0.9989	39	Cargentoratense_DSM44202,"Catypicum_R2070","Caurimucosum_ATCC700975","Cbelfantii_FRC0043","Ccallunae_DSM20147","Ccamporealensis_DSM44610","Cdeserti_GIMN1010","Cdiphtheriae_NCTC11397","Cdoosanense_DSM45436","Cefficiens_YS314","Cepidermidicanis_DSM45586","Cfalsenii_DSM44353","Cglutamicum_ATCC13032","Cglycinophilum_AJ3170","Chalotolerans_YIM70093","Chumireducens_DSM45392","Cimitans_DSM44264","Cjeike…	0.141156	0.141156	1.57295	0.141156	0.141156	1.57295	1026	1	1. 0.44297;2. 362;3. 1084;4. 401;5. 401;6. 1201;7. 462;8. 1384;9. 904;10. E;11. GAG
ERS451417_00395	1717.62.peg.395	NA	NA	NA	0.9989	39	Cargentoratense_DSM44202,"Catypicum_R2070","Caurimucosum_ATCC700975","Cbelfantii_FRC0043","Ccallunae_DSM20147","Ccamporealensis_DSM44610","Cdeserti_GIMN1010","Cdiphtheriae_NCTC11397","Cdoosanense_DSM45436","Cefficiens_YS314","Cepidermidicanis_DSM45586","Cfalsenii_DSM44353","Cglutamicum_ATCC13032","Cglycinophilum_AJ3170","Chalotolerans_YIM70093","Chumireducens_DSM45392","Cimitans_DSM44264","Cjeike…	0.107795	0.0172466	2.55815	0.0688315	0.0172466	2.55815	258	0
ERS451417_01141	1717.62.peg.1152	NA	NA	NA	0.9989	39	Cargentoratense_DSM44202,"Catypicum_R2070","Caurimucosum_ATCC700975","Cbelfantii_FRC0043","Ccallunae_DSM20147","Ccamporealensis_DSM44610","Cdeserti_GIMN1010","Cdiphtheriae_NCTC11397","Cdoosanense_DSM45436","Cefficiens_YS314","Cepidermidicanis_DSM45586","Cfalsenii_DSM44353","Cglutamicum_ATCC13032","Cglycinophilum_AJ3170","Chalotolerans_YIM70093","Chumireducens_DSM45392","Cimitans_DSM44264","Cjeike…	0.0818391	0.0818391	2.0128	0.0818294	0.0818294	2.01288	258	0
ERS451417_00199	1717.62.peg.196	NA	NA	NA	0.9989	39	Cargentoratense_DSM44202,"Catypicum_R2070","Caurimucosum_ATCC700975","Cbelfantii_FRC0043","Ccallunae_DSM20147","Ccamporealensis_DSM44610","Cdeserti_GIMN1010","Cdiphtheriae_NCTC11397","Cdoosanense_DSM45436","Cefficiens_YS314","Cepidermidicanis_DSM45586","Cfalsenii_DSM44353","Cglutamicum_ATCC13032","Cglycinophilum_AJ3170","Chalotolerans_YIM70093","Chumireducens_DSM45392","Cimitans_DSM44264","Cjeike…	0.118854	0.118854	2.06443	0.118854	0.118854	2.06443	258	0
ERS451417_00858	1717.62.peg.863	NA	NA	NA	1	35	Cargentoratense_DSM44202,"Catypicum_R2070","Caurimucosum_ATCC700975","Cbelfantii_FRC0043","Ccallunae_DSM20147","Ccamporealensis_DSM44610","Cdeserti_GIMN1010","Cdiphtheriae_NCTC11397","Cdoosanense_DSM45436","Cefficiens_YS314","Cepidermidicanis_DSM45586","Cfalsenii_DSM44353","Cglutamicum_ATCC13032","Chalotolerans_YIM70093","Chumireducens_DSM45392","Cimitans_DSM44264","Ckroppenstedtii_DSM44385","Cku…	0.0884933	0.0884933	1.60867	0.0884933	0.0884933	1.60867	258	0
ERS451417_00639	1717.62.peg.643	NA	NA	NA	1	19	Cargentoratense_DSM44202,"Cbelfantii_FRC0043","Cdiphtheriae_NCTC11397","Cepidermidicanis_DSM45586","Cfalsenii_DSM44353","Cglycinophilum_AJ3170","Chalotolerans_YIM70093","Chumireducens_DSM45392","Clactis_RW25","Cmarinum_DSM44953","Cmustelae_DSM45274","Cpseudotuberculosis_31","Cpseudotuberculosis_ATCC19410","Crouxii_FRC0190","Csilvaticum_KL0182","Ctestudinoris_DSM44614","Culcerans_NCTC12077","Culce…	0.137672	0.137672	1.69543	0.137672	0.137672	1.69543	258	0
ERS451417_00381	1717.62.peg.381	NA	NA	NA	1	9	Cbelfantii_FRC0043,"Cdiphtheriae_NCTC11397","Cglycinophilum_AJ3170","Cpseudotuberculosis_31","Cpseudotuberculosis_ATCC19410","Crouxii_FRC0190","Csilvaticum_KL0182","Culcerans_NCTC12077","Culcerans_NCTC7910"	0.216858	0.216858	3.57314	0.216858	0.216858	3.57314	1026	2	1. 0.42597;2. 244;3. 730;4. 333;5. 315;6. 943;7. 397;8. 1189;9. 553;10. H;11. CAC	1. 0.45163;2. 296;3. 886;4. 389;5. 367;6. 1099;7. 449;8. 1345;9. 709;10. M;11. ATG
ERS451417_00672	1717.62.peg.679	NA	NA	NA	1	15	Cargentoratense_DSM44202,"Cbelfantii_FRC0043","Cdiphtheriae_NCTC11397","Cefficiens_YS314","Cepidermidicanis_DSM45586","Ckutscheri_DSM20755","Clactis_RW25","Cmustelae_DSM45274","Cpseudotuberculosis_31","Cpseudotuberculosis_ATCC19410","Crouxii_FRC0190","Csilvaticum_KL0182","Culcerans_NCTC12077","Culcerans_NCTC7910","Cvitaeruminis_DSM20294"	0.21193	0.21193	2.17225	0.21193	0.21193	2.17225	258	0
ERS451417_01040	1717.62.peg.1050	NA	NA	NA	1	20	Cbelfantii_FRC0043,"Ccallunae_DSM20147","Cdeserti_GIMN1010","Cdiphtheriae_NCTC11397","Cefficiens_YS314","Cglutamicum_ATCC13032","Chalotolerans_YIM70093","Chumireducens_DSM45392","Cjeikeium_K41","Cmarinum_DSM44953","Cmustelae_DSM45274","Cpseudotuberculosis_31","Cpseudotuberculosis_ATCC19410","CriegeliiPUDD83A45","Crouxii_FRC0190","Csilvaticum_KL0182","Culcerans_NCTC12077","Culcerans_NCTC7910","Cur…	0.353884	0.303307	1.7069	0.306931	0.303307	1.70689	258	0
ERS451417_00296	1717.62.peg.297	NA	NA	NA	1	14	Cbelfantii_FRC0043,"Cdiphtheriae_NCTC11397","Cepidermidicanis_DSM45586","Chalotolerans_YIM70093","Chumireducens_DSM45392","Ckutscheri_DSM20755","Cmustelae_DSM45274","Cpseudotuberculosis_31","Cpseudotuberculosis_ATCC19410","Crouxii_FRC0190","Csilvaticum_KL0182","Culcerans_NCTC12077","Culcerans_NCTC7910","Cvitaeruminis_DSM20294"	0.30002	0.30002	2.10167	0.30002	0.30002	2.10166	3330	0
ERS451417_00645	1717.62.peg.649	NA	NA	NA	1	8	Cbelfantii_FRC0043,"Cdiphtheriae_NCTC11397","Ckutscheri_DSM20755","Cpseudotuberculosis_ATCC19410","Crouxii_FRC0190","Csilvaticum_KL0182","Culcerans_NCTC7910","Cvitaeruminis_DSM20294"	0.0161331	0.0130397	2.86091	0.01305	0.01305	2.86053	258	0
ERS451417_00600	1717.62.peg.604	NA	NA	NA	1	39	Cargentoratense_DSM44202,"Catypicum_R2070","Caurimucosum_ATCC700975","Cbelfantii_FRC0043","Ccallunae_DSM20147","Ccamporealensis_DSM44610","Cdeserti_GIMN1010","Cdiphtheriae_NCTC11397","Cdoosanense_DSM45436","Cefficiens_YS314","Cepidermidicanis_DSM45586","Cfalsenii_DSM44353","Cglutamicum_ATCC13032","Cglycinophilum_AJ3170","Chalotolerans_YIM70093","Chumireducens_DSM45392","Cimitans_DSM44264","Cjeike…	0.391148	0.0925962	1.96105	0.207109	0.103186	1.965	3330	0
ERS451417_00826	1717.62.peg.830	NA	NA	NA	1	14	Cbelfantii_FRC0043,"Ccallunae_DSM20147","Cdeserti_GIMN1010","Cdiphtheriae_NCTC11397","Cefficiens_YS314","Cglutamicum_ATCC13032","Ckutscheri_DSM20755","Cmustelae_DSM45274","Cpseudotuberculosis_31","Cpseudotuberculosis_ATCC19410","Crouxii_FRC0190","Csilvaticum_KL0182","Culcerans_NCTC12077","Culcerans_NCTC7910"	0.244254	0.159815	2.14374	0.244254	0.159815	2.14374	3074	1	1. 0.78598;2. 66;3. 196;4. 139;5. 109;6. 325;7. 124;8. 370;9. 70;10. E;11. GAA
ERS451417_00014	1717.62.peg.13	NA	NA	NA	1	18	Cargentoratense_DSM44202,"Caurimucosum_ATCC700975","Cbelfantii_FRC0043","Ccamporealensis_DSM44610","Cdiphtheriae_NCTC11397","Cglycinophilum_AJ3170","Chalotolerans_YIM70093","Chumireducens_DSM45392","Cimitans_DSM44264","Ckroppenstedtii_DSM44385","Cmustelae_DSM45274","CriegeliiPUDD83A45","Crouxii_FRC0190","Csimulans_PES1","Csingulare_IBSB52218","Ctestudinoris_DSM44614","Cureicelerivorans_IMMIBRIV23…	0.116419	0.116419	1.68638	0.116419	0.116419	1.68638	2	3	1. 0.64512;2. 220;3. 658;4. 253;5. 238;6. 712;7. 248;8. 742;9. 631;10. R;11. CGT	1. 0.67836;2. 275;3. 823;4. 315;5. 293;6. 877;7. 303;8. 907;9. 796;10. G;11. GGG	1. 0.59874;2. 455;3. 1363;4. 524;5. 498;6. 1492;7. 517;8. 1549;9. 1129;10. V;11. GTC
ERS451417_00541	1717.62.peg.545	NA	NA	NA	1	9	Cbelfantii_FRC0043,"Cdiphtheriae_NCTC11397","Cglycinophilum_AJ3170","Cpseudotuberculosis_31","Cpseudotuberculosis_ATCC19410","Crouxii_FRC0190","Csilvaticum_KL0182","Culcerans_NCTC12077","Culcerans_NCTC7910"	40.0186	0.0742911	2.51628	0.0742911	0.0742911	2.51627	256	0
ERS451417_01217	1717.62.peg.1225	NA	NA	NA	1	28	Catypicum_R2070,"Caurimucosum_ATCC700975","Cbelfantii_FRC0043","Ccallunae_DSM20147","Ccamporealensis_DSM44610","Cdeserti_GIMN1010","Cdiphtheriae_NCTC11397","Cdoosanense_DSM45436","Cefficiens_YS314","Cepidermidicanis_DSM45586","Cglutamicum_ATCC13032","Chalotolerans_YIM70093","Chumireducens_DSM45392","Ckutscheri_DSM20755","Cmarinum_DSM44953","Cmaris_DSM45190","Cmustelae_DSM45274","Cpseudotuberculos…	0.258655	0.258655	1.66087	0.258655	0.258655	1.66087	2306	0
ERS451417_00522	1717.62.peg.526	NA	NA	NA	1	3	Cbelfantii_FRC0043,"Cdiphtheriae_NCTC11397","Crouxii_FRC0190"	0.394786	0.394786	8.25579	0.394786	0.394786	8.25578	386	0
ERS451417_00830	1717.62.peg.834	NA	NA	NA	1	9	Cbelfantii_FRC0043,"Cdiphtheriae_NCTC11397","Ckutscheri_DSM20755","Cpseudotuberculosis_31","Cpseudotuberculosis_ATCC19410","Crouxii_FRC0190","Culcerans_NCTC12077","Culcerans_NCTC7910","Cvitaeruminis_DSM20294"	19.889	0.149296	2.29514	0.149365	0.149296	2.29514	2304	0
ERS451417_00753	1717.62.peg.758	NA	NA	NA	1	39	Cargentoratense_DSM44202,"Catypicum_R2070","Caurimucosum_ATCC700975","Cbelfantii_FRC0043","Ccallunae_DSM20147","Ccamporealensis_DSM44610","Cdeserti_GIMN1010","Cdiphtheriae_NCTC11397","Cdoosanense_DSM45436","Cefficiens_YS314","Cepidermidicanis_DSM45586","Cfalsenii_DSM44353","Cglutamicum_ATCC13032","Cglycinophilum_AJ3170","Chalotolerans_YIM70093","Chumireducens_DSM45392","Cimitans_DSM44264","Cjeike…	0.10568	0.10568	2.60467	0.10568	0.10568	2.60467	258	0
ERS451417_00593	1717.62.peg.597	NA	NA	NA	1	24	Cargentoratense_DSM44202,"Catypicum_R2070","Cbelfantii_FRC0043","Ccallunae_DSM20147","Cdeserti_GIMN1010","Cdiphtheriae_NCTC11397","Cefficiens_YS314","Cepidermidicanis_DSM45586","Cfalsenii_DSM44353","Cglutamicum_ATCC13032","Cglycinophilum_AJ3170","Ckroppenstedtii_DSM44385","Ckutscheri_DSM20755","Clactis_RW25","Cmustelae_DSM45274","Cpseudotuberculosis_31","Cpseudotuberculosis_ATCC19410","Crouxii_FR…	0.0390919	0.0390919	2.15437	0.0390919	0.0390919	2.15437	2050	1	1. 0.40919;2. 315;3. 943;4. 327;5. 327;6. 979;7. 367;8. 1099;9. 685;10. I;11. ATT
ERS451417_00733	1717.62.peg.736	NA	NA	NA	1	39	Cargentoratense_DSM44202,"Catypicum_R2070","Caurimucosum_ATCC700975","Cbelfantii_FRC0043","Ccallunae_DSM20147","Ccamporealensis_DSM44610","Cdeserti_GIMN1010","Cdiphtheriae_NCTC11397","Cdoosanense_DSM45436","Cefficiens_YS314","Cepidermidicanis_DSM45586","Cfalsenii_DSM44353","Cglutamicum_ATCC13032","Cglycinophilum_AJ3170","Chalotolerans_YIM70093","Chumireducens_DSM45392","Cimitans_DSM44264","Cjeike…	0.138076	0.138076	1.8105	0.138076	0.138076	1.8105	258	0
ERS451417_00880	1717.62.peg.886	NA	NA	NA	1	8	Cbelfantii_FRC0043,"Cdiphtheriae_NCTC11397","Cpseudotuberculosis_31","Cpseudotuberculosis_ATCC19410","Crouxii_FRC0190","Csilvaticum_KL0182","Culcerans_NCTC12077","Culcerans_NCTC7910"	0.112112	0.112112	2.30803	0.112122	0.112122	2.30803	2	2	1. 0.45222;2. 9;3. 25;4. 10;5. 9;6. 25;7. 9;8. 25;9. 25;10. F;11. TTC	1. 0.51075;2. 72;3. 214;4. 76;5. 75;6. 223;7. 75;8. 223;9. 196;10. K;11. AAG
ERS451417_01012	1717.62.peg.1023	NA	NA	NA	1	30	Cargentoratense_DSM44202,"Caurimucosum_ATCC700975","Cbelfantii_FRC0043","Ccallunae_DSM20147","Ccamporealensis_DSM44610","Cdeserti_GIMN1010","Cdiphtheriae_NCTC11397","Cdoosanense_DSM45436","Cefficiens_YS314","Cglutamicum_ATCC13032","Chalotolerans_YIM70093","Chumireducens_DSM45392","Cimitans_DSM44264","Ckutscheri_DSM20755","Cmarinum_DSM44953","Cmaris_DSM45190","Cmustelae_DSM45274","Cpseudotuberculo…	0.143885	0.143885	1.54686	0.143885	0.143885	1.54686	2050	1	1. 0.44138;2. 286;3. 856;4. 355;5. 309;6. 925;7. 339;8. 1015;9. 598;10. E;11. GAA
ERS451417_00928	1717.62.peg.935	NA	NA	NA	1	20	Caurimucosum_ATCC700975,"Cbelfantii_FRC0043","Ccamporealensis_DSM44610","Cdiphtheriae_NCTC11397","Cdoosanense_DSM45436","Chalotolerans_YIM70093","Chumireducens_DSM45392","Cmarinum_DSM44953","Cmaris_DSM45190","Cpseudotuberculosis_31","Cpseudotuberculosis_ATCC19410","Crouxii_FRC0190","Csilvaticum_KL0182","Csimulans_PES1","Csingulare_IBSB52218","Ctestudinoris_DSM44614","Culcerans_NCTC12077","Culcera…	0.201561	0.201561	1.5797	0.201561	0.201561	1.57969	3074	1	1. 0.57297;2. 123;3. 367;4. 189;5. 131;6. 391;7. 155;8. 463;9. 220;10. A;11. GCT
ERS451417_01259	1717.62.peg.1267	NA	NA	NA	1	18	Cargentoratense_DSM44202,"Cbelfantii_FRC0043","Ccallunae_DSM20147","Cdiphtheriae_NCTC11397","Cefficiens_YS314","Cepidermidicanis_DSM45586","Cglutamicum_ATCC13032","Ckroppenstedtii_DSM44385","Ckutscheri_DSM20755","Clactis_RW25","Cmustelae_DSM45274","Cpseudotuberculosis_31","Cpseudotuberculosis_ATCC19410","Crouxii_FRC0190","Csilvaticum_KL0182","Culcerans_NCTC12077","Culcerans_NCTC7910","Cvitaerumin…	0.145887	0.145887	1.99145	0.145887	0.145887	1.99145	2	6	1. 0.40157;2. 39;3. 115;4. 45;5. 45;6. 133;7. 67;8. 199;9. 58;10. D;11. GAT	1. 0.40973;2. 45;3. 133;4. 51;5. 51;6. 151;7. 73;8. 217;9. 76;10. L;11. CTC	1. 0.43778;2. 114;3. 340;4. 129;5. 120;6. 358;7. 142;8. 424;9. 283;10. L;11. CTG	1. 0.44479;2. 194;3. 580;4. 211;5. 200;6. 598;7. 222;8. 664;9. 496;10. L;11. CTT	1. 0.41084;2. 523;3. 1567;4. 565;5. 541;6. 1621;7. 589;8. 1765;9. 1411;10. I;11. ATT	1. 0.44571;2. 1059;3. 3175;4. 1131;5. 1107;6. 3319;7. 1198;8. 3592;9. 2875;10. V;11. GTA
ERS451417_00216	1717.62.peg.213	NA	NA	NA	1	23	Catypicum_R2070,"Cbelfantii_FRC0043","Ccallunae_DSM20147","Ccamporealensis_DSM44610","Cdeserti_GIMN1010","Cdiphtheriae_NCTC11397","Cdoosanense_DSM45436","Cglutamicum_ATCC13032","Chumireducens_DSM45392","Cimitans_DSM44264","Ckutscheri_DSM20755","Cmarinum_DSM44953","Cmustelae_DSM45274","Cpseudotuberculosis_31","Cpseudotuberculosis_ATCC19410","CriegeliiPUDD83A45","Crouxii_FRC0190","Csilvaticum_KL018…	0.207749	0.207749	1.33601	0.207749	0.207749	1.33601	258	0
ERS451417_00351	1717.62.peg.354	NA	NA	NA	1	39	Cargentoratense_DSM44202,"Catypicum_R2070","Caurimucosum_ATCC700975","Cbelfantii_FRC0043","Ccallunae_DSM20147","Ccamporealensis_DSM44610","Cdeserti_GIMN1010","Cdiphtheriae_NCTC11397","Cdoosanense_DSM45436","Cefficiens_YS314","Cepidermidicanis_DSM45586","Cfalsenii_DSM44353","Cglutamicum_ATCC13032","Cglycinophilum_AJ3170","Chalotolerans_YIM70093","Chumireducens_DSM45392","Cimitans_DSM44264","Cjeike…	0.250681	0.250681	1.77223	0.250681	0.250681	1.77223	1026	1	1. 0.43709;2. 273;3. 817;4. 320;5. 320;6. 958;7. 472;8. 1414;9. 685;10. A;11. GCC
ERS451417_00791	1717.62.peg.798	NA	NA	NA	1	3	Cbelfantii_FRC0043,"Cdiphtheriae_NCTC11397","Crouxii_FRC0190"	0.083	0.083	4.0174	0.083	0.083	4.0174	130	2	1. 0.53468;2. 134;3. 400;4. 198;5. 134;6. 400;7. 134;8. 400;9. 400;10. L;11. CTC	1. 0.46513;2. 301;3. 901;4. 385;5. 301;6. 901;7. 301;8. 901;9. 901;10. M;11. ATG
ERS451417_00468	1717.62.peg.472	NA	NA	NA	1	12	Cbelfantii_FRC0043,"Cdiphtheriae_NCTC11397","Ckutscheri_DSM20755","Cmustelae_DSM45274","Cpseudotuberculosis_31","Cpseudotuberculosis_ATCC19410","Crouxii_FRC0190","Csilvaticum_KL0182","Culcerans_NCTC12077","Culcerans_NCTC7910","Cuterequi_DSM45634","Cvitaeruminis_DSM20294"	0.162765	0.162765	3.17345	0.162765	0.162765	3.17346	2	1	1. 0.41213;2. 221;3. 661;4. 293;5. 231;6. 691;7. 271;8. 811;9. 568;10. G;11. GGT
ERS451417_00209	1717.62.peg.206	NA	NA	NA	1	6	Cbelfantii_FRC0043,"Cdiphtheriae_NCTC11397","Cmustelae_DSM45274","Cpseudotuberculosis_31","Cpseudotuberculosis_ATCC19410","Crouxii_FRC0190"	0.112753	0.112753	2.86058	0.112753	0.112753	2.86058	2	1	1. 0.58;2. 251;3. 751;4. 251;5. 251;6. 751;7. 251;8. 751;9. 751;10. G;11. GGC
ERS451417_00200	1717.62.peg.197	NA	NA	NA	1	39	Cargentoratense_DSM44202,"Catypicum_R2070","Caurimucosum_ATCC700975","Cbelfantii_FRC0043","Ccallunae_DSM20147","Ccamporealensis_DSM44610","Cdeserti_GIMN1010","Cdiphtheriae_NCTC11397","Cdoosanense_DSM45436","Cefficiens_YS314","Cepidermidicanis_DSM45586","Cfalsenii_DSM44353","Cglutamicum_ATCC13032","Cglycinophilum_AJ3170","Chalotolerans_YIM70093","Chumireducens_DSM45392","Cimitans_DSM44264","Cjeike…	0.229479	0.194271	2.03319	0.229479	0.194271	2.03319	2	5	1. 0.48328;2. 87;3. 259;4. 90;5. 90;6. 268;7. 90;8. 268;9. 238;10. A;11. GCC	1. 0.43526;2. 146;3. 436;4. 149;5. 149;6. 445;7. 149;8. 445;9. 415;10. A;11. GCC	1. 0.51654;2. 148;3. 442;4. 151;5. 151;6. 451;7. 151;8. 451;9. 421;10. G;11. GGC	1. 0.56425;2. 155;3. 463;4. 158;5. 158;6. 472;7. 158;8. 472;9. 442;10. S;11. TCC	1. 0.51877;2. 241;3. 721;4. 259;5. 259;6. 775;7. 295;8. 883;9. 628;10. D;11. GAC
ERS451417_00391	1717.62.peg.391	NA	NA	NA	1	39	Cargentoratense_DSM44202,"Catypicum_R2070","Caurimucosum_ATCC700975","Cbelfantii_FRC0043","Ccallunae_DSM20147","Ccamporealensis_DSM44610","Cdeserti_GIMN1010","Cdiphtheriae_NCTC11397","Cdoosanense_DSM45436","Cefficiens_YS314","Cepidermidicanis_DSM45586","Cfalsenii_DSM44353","Cglutamicum_ATCC13032","Cglycinophilum_AJ3170","Chalotolerans_YIM70093","Chumireducens_DSM45392","Cimitans_DSM44264","Cjeike…	0.0971543	0.0971543	1.7025	0.0971543	0.0971543	1.7025	258	0
ERS451417_00494	1717.62.peg.497	NA	NA	NA	1	38	Cargentoratense_DSM44202,"Catypicum_R2070","Caurimucosum_ATCC700975","Cbelfantii_FRC0043","Ccallunae_DSM20147","Ccamporealensis_DSM44610","Cdeserti_GIMN1010","Cdiphtheriae_NCTC11397","Cdoosanense_DSM45436","Cefficiens_YS314","Cepidermidicanis_DSM45586","Cfalsenii_DSM44353","Cglutamicum_ATCC13032","Cglycinophilum_AJ3170","Chalotolerans_YIM70093","Chumireducens_DSM45392","Cimitans_DSM44264","Cjeike…	0.311522	0.311522	1.26425	0.311522	0.311522	1.26425	258	0
ERS451417_00893	1717.62.peg.899	NA	NA	NA	1	23	Catypicum_R2070,"Caurimucosum_ATCC700975","Cbelfantii_FRC0043","Cdiphtheriae_NCTC11397","Cfalsenii_DSM44353","Cglycinophilum_AJ3170","Cimitans_DSM44264","Cjeikeium_K41","Ckroppenstedtii_DSM44385","Ckutscheri_DSM20755","Clactis_RW25","Cpseudotuberculosis_31","Cpseudotuberculosis_ATCC19410","CriegeliiPUDD83A45","Crouxii_FRC0190","Csilvaticum_KL0182","Csimulans_PES1","Csingulare_IBSB52218","Cterpeno…	0.184114	0.184114	1.91418	0.184114	0.184114	1.91418	258	0
ERS451417_00120	1717.62.peg.118	NA	NA	NA	1	13	Cbelfantii_FRC0043,"Ccallunae_DSM20147","Cdeserti_GIMN1010","Cdiphtheriae_NCTC11397","Cefficiens_YS314","Cglutamicum_ATCC13032","Chalotolerans_YIM70093","Chumireducens_DSM45392","Cmarinum_DSM44953","Cmaris_DSM45190","Crouxii_FRC0190","Ctestudinoris_DSM44614","Cvitaeruminis_DSM20294"	0.32087	0.32087	1.60851	0.32087	0.32087	1.60851	258	0
ERS451417_00577	1717.62.peg.580	NA	NA	NA	1	38	Cargentoratense_DSM44202,"Catypicum_R2070","Caurimucosum_ATCC700975","Cbelfantii_FRC0043","Ccallunae_DSM20147","Ccamporealensis_DSM44610","Cdeserti_GIMN1010","Cdiphtheriae_NCTC11397","Cdoosanense_DSM45436","Cefficiens_YS314","Cepidermidicanis_DSM45586","Cfalsenii_DSM44353","Cglutamicum_ATCC13032","Cglycinophilum_AJ3170","Chalotolerans_YIM70093","Chumireducens_DSM45392","Cimitans_DSM44264","Cjeike…	0.175632	0.175632	1.67578	0.175632	0.175632	1.67578	3330	0
ERS451417_01177	1717.62.peg.1186	NA	NA	NA	1	39	Cargentoratense_DSM44202,"Catypicum_R2070","Caurimucosum_ATCC700975","Cbelfantii_FRC0043","Ccallunae_DSM20147","Ccamporealensis_DSM44610","Cdeserti_GIMN1010","Cdiphtheriae_NCTC11397","Cdoosanense_DSM45436","Cefficiens_YS314","Cepidermidicanis_DSM45586","Cfalsenii_DSM44353","Cglutamicum_ATCC13032","Cglycinophilum_AJ3170","Chalotolerans_YIM70093","Chumireducens_DSM45392","Cimitans_DSM44264","Cjeike…	0.228173	0.228173	1.87053	0.228173	0.228173	1.87053	3330	0
ERS451417_00241	1717.62.peg.236	NA	NA	NA	1	7	Cbelfantii_FRC0043,"Cdiphtheriae_NCTC11397","Cpseudotuberculosis_31","Cpseudotuberculosis_ATCC19410","Crouxii_FRC0190","Culcerans_NCTC12077","Culcerans_NCTC7910"	0.270506	0.270506	3.30139	0.270506	0.270506	3.30139	2	1	1. 0.49598;2. 46;3. 136;4. 91;5. 46;6. 136;7. 46;8. 136;9. 115;10. H;11. CAT
ERS451417_01194	1717.62.peg.1203	NA	NA	NA	1	30	Caurimucosum_ATCC700975,"Cbelfantii_FRC0043","Ccallunae_DSM20147","Ccamporealensis_DSM44610","Cdeserti_GIMN1010","Cdiphtheriae_NCTC11397","Cdoosanense_DSM45436","Cefficiens_YS314","Cepidermidicanis_DSM45586","Cglutamicum_ATCC13032","Chalotolerans_YIM70093","Chumireducens_DSM45392","Cimitans_DSM44264","Ckutscheri_DSM20755","Cmarinum_DSM44953","Cmaris_DSM45190","Cmustelae_DSM45274","Cpseudotubercul…	0.207139	0.179017	1.67658	0.207139	0.179017	1.67658	2	3	1. 0.61018;2. 36;3. 106;4. 44;5. 44;6. 130;7. 53;8. 157;9. 61;10. I;11. ATT	1. 0.51265;2. 41;3. 121;4. 49;5. 49;6. 145;7. 58;8. 172;9. 76;10. G;11. GGG	1. 0.51664;2. 70;3. 208;4. 78;5. 78;6. 232;7. 87;8. 259;9. 163;10. A;11. GCG
ERS451417_00370	1717.62.peg.369	NA	NA	NA	1	39	Cargentoratense_DSM44202,"Catypicum_R2070","Caurimucosum_ATCC700975","Cbelfantii_FRC0043","Ccallunae_DSM20147","Ccamporealensis_DSM44610","Cdeserti_GIMN1010","Cdiphtheriae_NCTC11397","Cdoosanense_DSM45436","Cefficiens_YS314","Cepidermidicanis_DSM45586","Cfalsenii_DSM44353","Cglutamicum_ATCC13032","Cglycinophilum_AJ3170","Chalotolerans_YIM70093","Chumireducens_DSM45392","Cimitans_DSM44264","Cjeike…	0.103904	0.103904	2.02423	0.103904	0.103904	2.02422	2	1	1. 0.6026;2. 1159;3. 3475;4. 1180;5. 1180;6. 3538;7. 1211;8. 3631;9. 3301;10. A;11. GCC
ERS451417_00212	1717.62.peg.209	NA	NA	NA	1	11	Cbelfantii_FRC0043,"Cdiphtheriae_NCTC11397","Ckroppenstedtii_DSM44385","Clactis_RW25","Cmustelae_DSM45274","Cpseudotuberculosis_31","Cpseudotuberculosis_ATCC19410","Crouxii_FRC0190","Csilvaticum_KL0182","Culcerans_NCTC12077","Culcerans_NCTC7910"	0.0428012	0.0428012	2.39381	0.0428012	0.0428012	2.39382	258	0
ERS451417_01146	1717.62.peg.1157	NA	NA	NA	1	18	Catypicum_R2070,"Cbelfantii_FRC0043","Cdiphtheriae_NCTC11397","Cefficiens_YS314","Cepidermidicanis_DSM45586","Clactis_RW25","Cmarinum_DSM44953","Cmaris_DSM45190","Cpseudotuberculosis_31","Cpseudotuberculosis_ATCC19410","Crouxii_FRC0190","Csilvaticum_KL0182","Csimulans_PES1","Ctestudinoris_DSM44614","Culcerans_NCTC12077","Culcerans_NCTC7910","Cuterequi_DSM45634","Cvitaeruminis_DSM20294"	0.259044	0.259044	1.66286	0.259044	0.259044	1.66287	2	1	1. 0.54896;2. 127;3. 379;4. 129;5. 129;6. 385;7. 173;8. 517;9. 307;10. T;11. ACT
ERS451417_00073	1717.62.peg.70	NA	NA	NA	1	16	Caurimucosum_ATCC700975,"Cbelfantii_FRC0043","Cdiphtheriae_NCTC11397","Cepidermidicanis_DSM45586","Cjeikeium_K41","Ckutscheri_DSM20755","Clactis_RW25","Cmustelae_DSM45274","Cpseudotuberculosis_31","Cpseudotuberculosis_ATCC19410","CriegeliiPUDD83A45","Crouxii_FRC0190","Csilvaticum_KL0182","Culcerans_NCTC12077","Culcerans_NCTC7910","Cvitaeruminis_DSM20294"	0.282344	0.282344	3.33246	0.282344	0.282344	3.33246	2306	0
ERS451417_00358	1717.62.peg.357	NA	NA	NA	1	39	Cargentoratense_DSM44202,"Catypicum_R2070","Caurimucosum_ATCC700975","Cbelfantii_FRC0043","Ccallunae_DSM20147","Ccamporealensis_DSM44610","Cdeserti_GIMN1010","Cdiphtheriae_NCTC11397","Cdoosanense_DSM45436","Cefficiens_YS314","Cepidermidicanis_DSM45586","Cfalsenii_DSM44353","Cglutamicum_ATCC13032","Cglycinophilum_AJ3170","Chalotolerans_YIM70093","Chumireducens_DSM45392","Cimitans_DSM44264","Cjeike…	0.185403	0.185403	1.87576	0.185403	0.185403	1.87577	258	0
ERS451417_00508	1717.62.peg.512	NA	NA	NA	1	34	Cargentoratense_DSM44202,"Catypicum_R2070","Caurimucosum_ATCC700975","Cbelfantii_FRC0043","Ccallunae_DSM20147","Ccamporealensis_DSM44610","Cdeserti_GIMN1010","Cdiphtheriae_NCTC11397","Cdoosanense_DSM45436","Cefficiens_YS314","Cepidermidicanis_DSM45586","Cglutamicum_ATCC13032","Chalotolerans_YIM70093","Chumireducens_DSM45392","Cimitans_DSM44264","Ckroppenstedtii_DSM44385","Ckutscheri_DSM20755","Cl…	2.44884	0.125832	1.97851	0.125721	0.125721	1.97919	2304	0
ERS451417_00396	1717.62.peg.396	NA	NA	NA	1	39	Cargentoratense_DSM44202,"Catypicum_R2070","Caurimucosum_ATCC700975","Cbelfantii_FRC0043","Ccallunae_DSM20147","Ccamporealensis_DSM44610","Cdeserti_GIMN1010","Cdiphtheriae_NCTC11397","Cdoosanense_DSM45436","Cefficiens_YS314","Cepidermidicanis_DSM45586","Cfalsenii_DSM44353","Cglutamicum_ATCC13032","Cglycinophilum_AJ3170","Chalotolerans_YIM70093","Chumireducens_DSM45392","Cimitans_DSM44264","Cjeike…	0.175528	0.175528	1.808	0.175528	0.175528	1.80802	258	0
1717.62.peg.244	1717.62.peg.244	NA	NA	NA	1	39	Cargentoratense_DSM44202,"Catypicum_R2070","Caurimucosum_ATCC700975","Cbelfantii_FRC0043","Ccallunae_DSM20147","Ccamporealensis_DSM44610","Cdeserti_GIMN1010","Cdiphtheriae_NCTC11397","Cdoosanense_DSM45436","Cefficiens_YS314","Cepidermidicanis_DSM45586","Cfalsenii_DSM44353","Cglutamicum_ATCC13032","Cglycinophilum_AJ3170","Chalotolerans_YIM70093","Chumireducens_DSM45392","Cimitans_DSM44264","Cjeike…	0.155999	0.155999	1.4738	0.155999	0.155999	1.47382	258	0
ERS451417_00548	1717.62.peg.552	NA	NA	NA	1	13	Cargentoratense_DSM44202,"Cbelfantii_FRC0043","Cdiphtheriae_NCTC11397","Ckutscheri_DSM20755","Clactis_RW25","Cmustelae_DSM45274","Cpseudotuberculosis_31","Cpseudotuberculosis_ATCC19410","Crouxii_FRC0190","Csilvaticum_KL0182","Culcerans_NCTC12077","Culcerans_NCTC7910","Curealyticum_DSM7109"	0.0993446	0.0993446	2.39993	0.0993446	0.0993446	2.39994	258	0
ERS451417_00469	1717.62.peg.473	NA	NA	NA	1	12	Cbelfantii_FRC0043,"Cdiphtheriae_NCTC11397","Ckutscheri_DSM20755","Cmustelae_DSM45274","Cpseudotuberculosis_31","Cpseudotuberculosis_ATCC19410","Crouxii_FRC0190","Csilvaticum_KL0182","Culcerans_NCTC12077","Culcerans_NCTC7910","Cuterequi_DSM45634","Cvitaeruminis_DSM20294"	0.0688948	0.0688948	2.55342	0.0688948	0.0688948	2.55341	2	1	1. 0.51015;2. 72;3. 214;4. 88;5. 86;6. 256;7. 106;8. 316;9. 169;10. T;11. ACT
ERS451417_00123	1717.62.peg.121	NA	NA	NA	1	11	Cbelfantii_FRC0043,"Cdiphtheriae_NCTC11397","Chumireducens_DSM45392","Cmarinum_DSM44953","Cpseudotuberculosis_31","Cpseudotuberculosis_ATCC19410","Crouxii_FRC0190","Csilvaticum_KL0182","Ctestudinoris_DSM44614","Culcerans_NCTC12077","Culcerans_NCTC7910"	0.440401	0.122145	1.98001	0.127266	0.127266	1.96691	2306	0
ERS451417_00980	1717.62.peg.990	NA	NA	NA	1	35	Cargentoratense_DSM44202,"Catypicum_R2070","Caurimucosum_ATCC700975","Cbelfantii_FRC0043","Ccallunae_DSM20147","Ccamporealensis_DSM44610","Cdeserti_GIMN1010","Cdiphtheriae_NCTC11397","Cdoosanense_DSM45436","Cefficiens_YS314","Cepidermidicanis_DSM45586","Cfalsenii_DSM44353","Cglutamicum_ATCC13032","Cglycinophilum_AJ3170","Chalotolerans_YIM70093","Chumireducens_DSM45392","Cjeikeium_K41","Ckroppenst…	0.298613	0.156567	1.64069	0.298614	0.156568	1.64069	2050	6	1. 0.69327;2. 92;3. 274;4. 101;5. 97;6. 289;7. 111;8. 331;9. 127;10. D;11. GAC	1. 0.71246;2. 95;3. 283;4. 104;5. 100;6. 298;7. 114;8. 340;9. 136;10. A;11. GCT	1. 0.73668;2. 125;3. 373;4. 137;5. 130;6. 388;7. 144;8. 430;9. 226;10. A;11. GCT	1. 0.60797;2. 175;3. 523;4. 190;5. 183;6. 547;7. 198;8. 592;9. 325;10. V;11. GTC	1. 0.65538;2. 184;3. 550;4. 199;5. 192;6. 574;7. 207;8. 619;9. 352;10. T;11. ACC	1. 0.52087;2. 241;3. 721;4. 257;5. 249;6. 745;7. 264;8. 790;9. 496;10. P;11. CCA
ERS451417_00969	1717.62.peg.977	NA	NA	NA	1	13	Caurimucosum_ATCC700975,"Cbelfantii_FRC0043","Cdiphtheriae_NCTC11397","Cepidermidicanis_DSM45586","Ckutscheri_DSM20755","Clactis_RW25","Cpseudotuberculosis_31","Cpseudotuberculosis_ATCC19410","Crouxii_FRC0190","Csilvaticum_KL0182","Ctestudinoris_DSM44614","Culcerans_NCTC12077","Culcerans_NCTC7910"	0.252817	0.207654	2.59	0.252817	0.207654	2.59	2050	2	1. 0.66927;2. 203;3. 607;4. 281;5. 237;6. 709;7. 274;8. 820;9. 433;10. D;11. GAT	1. 0.66967;2. 229;3. 685;4. 307;5. 263;6. 787;7. 300;8. 898;9. 511;10. G;11. GGT
ERS451417_00558	1717.62.peg.562	NA	NA	NA	1	22	Cargentoratense_DSM44202,"Caurimucosum_ATCC700975","Cbelfantii_FRC0043","Cdeserti_GIMN1010","Cdiphtheriae_NCTC11397","Cglutamicum_ATCC13032","Cglycinophilum_AJ3170","Cimitans_DSM44264","Cjeikeium_K41","Ckutscheri_DSM20755","Cmustelae_DSM45274","Cpseudotuberculosis_31","Cpseudotuberculosis_ATCC19410","CriegeliiPUDD83A45","Crouxii_FRC0190","Csilvaticum_KL0182","Csimulans_PES1","Csingulare_IBSB52218…	0.0885938	0.0794788	1.73305	0.0796612	0.0796612	1.7328	3330	0
ERS451417_00509	1717.62.peg.513	NA	NA	NA	1	39	Cargentoratense_DSM44202,"Catypicum_R2070","Caurimucosum_ATCC700975","Cbelfantii_FRC0043","Ccallunae_DSM20147","Ccamporealensis_DSM44610","Cdeserti_GIMN1010","Cdiphtheriae_NCTC11397","Cdoosanense_DSM45436","Cefficiens_YS314","Cepidermidicanis_DSM45586","Cfalsenii_DSM44353","Cglutamicum_ATCC13032","Cglycinophilum_AJ3170","Chalotolerans_YIM70093","Chumireducens_DSM45392","Cimitans_DSM44264","Cjeike…	0.101692	0.101692	2.45381	0.101692	0.101692	2.45381	258	0
ERS451417_00237	1717.62.peg.233	NA	NA	NA	1	13	Caurimucosum_ATCC700975,"Cbelfantii_FRC0043","Cdiphtheriae_NCTC11397","Chalotolerans_YIM70093","Chumireducens_DSM45392","Cmarinum_DSM44953","Cmaris_DSM45190","Cpseudotuberculosis_31","Cpseudotuberculosis_ATCC19410","Crouxii_FRC0190","Csingulare_IBSB52218","Culcerans_NCTC12077","Culcerans_NCTC7910"	0.271783	0.271783	2.01704	0.271783	0.271783	2.01704	2050	1	1. 0.60001;2. 158;3. 472;4. 206;5. 160;6. 478;7. 168;8. 502;9. 367;10. M;11. ATG
ERS451417_01278	1717.62.peg.1286	NA	NA	NA	1	23	Catypicum_R2070,"Ccallunae_DSM20147","Cdeserti_GIMN1010","Cdiphtheriae_NCTC11397","Cdoosanense_DSM45436","Cefficiens_YS314","Cglutamicum_ATCC13032","Chalotolerans_YIM70093","Chumireducens_DSM45392","Ckutscheri_DSM20755","Cmarinum_DSM44953","Cmaris_DSM45190","Cmustelae_DSM45274","Cpseudotuberculosis_31","Cpseudotuberculosis_ATCC19410","CriegeliiPUDD83A45","Crouxii_FRC0190","Csilvaticum_KL0182","Ct…	0.349709	0.260941	1.76368	0.349719	0.260942	1.76368	2	2	1. 0.74253;2. 46;3. 136;4. 61;5. 54;6. 160;7. 65;8. 193;9. 97;10. A;11. GCA	1. 0.68773;2. 85;3. 253;4. 103;5. 93;6. 277;7. 104;8. 310;9. 214;10. I;11. ATC
ERS451417_01147	1717.62.peg.1158	NA	NA	NA	1	39	Cargentoratense_DSM44202,"Catypicum_R2070","Caurimucosum_ATCC700975","Cbelfantii_FRC0043","Ccallunae_DSM20147","Ccamporealensis_DSM44610","Cdeserti_GIMN1010","Cdiphtheriae_NCTC11397","Cdoosanense_DSM45436","Cefficiens_YS314","Cepidermidicanis_DSM45586","Cfalsenii_DSM44353","Cglutamicum_ATCC13032","Cglycinophilum_AJ3170","Chalotolerans_YIM70093","Chumireducens_DSM45392","Cimitans_DSM44264","Cjeike…	0.0744302	0.0744302	1.48462	0.0744302	0.0744302	1.48462	2	1	1. 0.41819;2. 234;3. 700;4. 244;5. 244;6. 730;7. 253;8. 757;9. 637;10. V;11. GTC
ERS451417_00675	1717.62.peg.682	NA	NA	NA	1	37	Cargentoratense_DSM44202,"Catypicum_R2070","Caurimucosum_ATCC700975","Cbelfantii_FRC0043","Ccallunae_DSM20147","Ccamporealensis_DSM44610","Cdeserti_GIMN1010","Cdiphtheriae_NCTC11397","Cdoosanense_DSM45436","Cefficiens_YS314","Cepidermidicanis_DSM45586","Cfalsenii_DSM44353","Cglutamicum_ATCC13032","Cglycinophilum_AJ3170","Chalotolerans_YIM70093","Chumireducens_DSM45392","Cimitans_DSM44264","Cjeike…	0.60964	0.186198	1.67137	0.185894	0.185894	1.66502	3330	0
ERS451417_01264	1717.62.peg.1272	NA	NA	NA	1	39	Cargentoratense_DSM44202,"Catypicum_R2070","Caurimucosum_ATCC700975","Cbelfantii_FRC0043","Ccallunae_DSM20147","Ccamporealensis_DSM44610","Cdeserti_GIMN1010","Cdiphtheriae_NCTC11397","Cdoosanense_DSM45436","Cefficiens_YS314","Cepidermidicanis_DSM45586","Cfalsenii_DSM44353","Cglutamicum_ATCC13032","Cglycinophilum_AJ3170","Chalotolerans_YIM70093","Chumireducens_DSM45392","Cimitans_DSM44264","Cjeike…	0.369276	0.257988	1.62317	0.369267	0.257998	1.62317	2	6	1. 0.73285;2. 182;3. 544;4. 195;5. 195;6. 583;7. 262;8. 784;9. 463;10. A;11. GCA	1. 0.67587;2. 232;3. 694;4. 246;5. 246;6. 736;7. 314;8. 940;9. 607;10. D;11. GAT	1. 0.60378;2. 316;3. 946;4. 333;5. 333;6. 997;7. 401;8. 1201;9. 838;10. E;11. GAG	1. 0.72607;2. 336;3. 1006;4. 353;5. 353;6. 1057;7. 421;8. 1261;9. 898;10. P;11. CCA	1. 0.7335;2. 347;3. 1039;4. 364;5. 364;6. 1090;7. 432;8. 1294;9. 931;10. A;11. GCA	1. 0.59972;2. 362;3. 1084;4. 379;5. 379;6. 1135;7. 447;8. 1339;9. 976;10. V;11. GTT
ERS451417_00851	1717.62.peg.856	NA	NA	NA	1	23	Cargentoratense_DSM44202,"Caurimucosum_ATCC700975","Cbelfantii_FRC0043","Ccallunae_DSM20147","Cdeserti_GIMN1010","Cdiphtheriae_NCTC11397","Cefficiens_YS314","Cfalsenii_DSM44353","Cglutamicum_ATCC13032","Cglycinophilum_AJ3170","Chumireducens_DSM45392","Cjeikeium_K41","Ckroppenstedtii_DSM44385","Ckutscheri_DSM20755","Clactis_RW25","Cmarinum_DSM44953","Cmustelae_DSM45274","Crouxii_FRC0190","Csingula…	0.201177	0.201177	1.81214	0.201177	0.201177	1.81214	1026	2	1. 0.43227;2. 159;3. 475;4. 191;5. 191;6. 571;7. 273;8. 817;9. 379;10. A;11. GCC	1. 0.43896;2. 185;3. 553;4. 217;5. 217;6. 649;7. 299;8. 895;9. 457;10. I;11. ATC
ERS451417_00944	1717.62.peg.951	NA	NA	NA	1	39	Cargentoratense_DSM44202,"Catypicum_R2070","Caurimucosum_ATCC700975","Cbelfantii_FRC0043","Ccallunae_DSM20147","Ccamporealensis_DSM44610","Cdeserti_GIMN1010","Cdiphtheriae_NCTC11397","Cdoosanense_DSM45436","Cefficiens_YS314","Cepidermidicanis_DSM45586","Cfalsenii_DSM44353","Cglutamicum_ATCC13032","Cglycinophilum_AJ3170","Chalotolerans_YIM70093","Chumireducens_DSM45392","Cimitans_DSM44264","Cjeike…	0.163295	0.163295	1.64797	0.163295	0.163295	1.64797	2	1	1. 0.43965;2. 208;3. 622;4. 232;5. 232;6. 694;7. 258;8. 772;9. 568;10. V;11. GTT
ERS451417_00293	1717.62.peg.294	NA	NA	NA	1	38	Cargentoratense_DSM44202,"Catypicum_R2070","Caurimucosum_ATCC700975","Cbelfantii_FRC0043","Ccallunae_DSM20147","Ccamporealensis_DSM44610","Cdeserti_GIMN1010","Cdiphtheriae_NCTC11397","Cdoosanense_DSM45436","Cefficiens_YS314","Cepidermidicanis_DSM45586","Cfalsenii_DSM44353","Cglutamicum_ATCC13032","Cglycinophilum_AJ3170","Chalotolerans_YIM70093","Chumireducens_DSM45392","Cimitans_DSM44264","Cjeike…	0.163054	0.163054	1.97969	0.163054	0.163054	1.97969	3330	0
ERS451417_00097	1717.62.peg.95	NA	NA	NA	1	31	Catypicum_R2070,"Caurimucosum_ATCC700975","Cbelfantii_FRC0043","Ccallunae_DSM20147","Ccamporealensis_DSM44610","Cdeserti_GIMN1010","Cdiphtheriae_NCTC11397","Cdoosanense_DSM45436","Cefficiens_YS314","Cepidermidicanis_DSM45586","Cglutamicum_ATCC13032","Chalotolerans_YIM70093","Chumireducens_DSM45392","Cimitans_DSM44264","Ckutscheri_DSM20755","Cmarinum_DSM44953","Cmaris_DSM45190","Cmustelae_DSM45274…	0.143541	0.143541	1.40658	0.143541	0.143541	1.40657	2306	0
ERS451417_00361	1717.62.peg.360	NA	NA	NA	1	39	Cargentoratense_DSM44202,"Catypicum_R2070","Caurimucosum_ATCC700975","Cbelfantii_FRC0043","Ccallunae_DSM20147","Ccamporealensis_DSM44610","Cdeserti_GIMN1010","Cdiphtheriae_NCTC11397","Cdoosanense_DSM45436","Cefficiens_YS314","Cepidermidicanis_DSM45586","Cfalsenii_DSM44353","Cglutamicum_ATCC13032","Cglycinophilum_AJ3170","Chalotolerans_YIM70093","Chumireducens_DSM45392","Cimitans_DSM44264","Cjeike…	0.160282	0.160282	1.65322	0.160282	0.160282	1.65322	258	0
ERS451417_01196	1717.62.peg.1205	NA	NA	NA	1	12	Caurimucosum_ATCC700975,"Ccamporealensis_DSM44610","Cdiphtheriae_NCTC11397","Cepidermidicanis_DSM45586","Cpseudotuberculosis_31","Cpseudotuberculosis_ATCC19410","Crouxii_FRC0190","Csilvaticum_KL0182","Csimulans_PES1","Csingulare_IBSB52218","Culcerans_NCTC12077","Culcerans_NCTC7910"	0.114294	0.114294	2.86489	0.114294	0.114294	2.8649	258	0
ERS451417_00789	1717.62.peg.796	NA	NA	NA	1	20	Catypicum_R2070,"Cbelfantii_FRC0043","Ccallunae_DSM20147","Cdeserti_GIMN1010","Cdiphtheriae_NCTC11397","Cdoosanense_DSM45436","Cefficiens_YS314","Cglutamicum_ATCC13032","Chalotolerans_YIM70093","Chumireducens_DSM45392","Ckutscheri_DSM20755","Cmarinum_DSM44953","Cmaris_DSM45190","Cmustelae_DSM45274","Crouxii_FRC0190","Csilvaticum_KL0182","Ctestudinoris_DSM44614","Culcerans_NCTC12077","Culcerans_NC…	0.326365	0.326365	1.50193	0.326365	0.326365	1.50193	2306	0
ERS451417_00318	1717.62.peg.320	NA	NA	NA	1	39	Cargentoratense_DSM44202,"Catypicum_R2070","Caurimucosum_ATCC700975","Cbelfantii_FRC0043","Ccallunae_DSM20147","Ccamporealensis_DSM44610","Cdeserti_GIMN1010","Cdiphtheriae_NCTC11397","Cdoosanense_DSM45436","Cefficiens_YS314","Cepidermidicanis_DSM45586","Cfalsenii_DSM44353","Cglutamicum_ATCC13032","Cglycinophilum_AJ3170","Chalotolerans_YIM70093","Chumireducens_DSM45392","Cimitans_DSM44264","Cjeike…	0.02542	0.02542	1.63754	0.02542	0.02542	1.63754	258	0
ERS451417_00572	1717.62.peg.575	NA	NA	NA	1	38	Cargentoratense_DSM44202,"Catypicum_R2070","Caurimucosum_ATCC700975","Cbelfantii_FRC0043","Ccallunae_DSM20147","Ccamporealensis_DSM44610","Cdeserti_GIMN1010","Cdiphtheriae_NCTC11397","Cdoosanense_DSM45436","Cefficiens_YS314","Cepidermidicanis_DSM45586","Cfalsenii_DSM44353","Cglutamicum_ATCC13032","Cglycinophilum_AJ3170","Chalotolerans_YIM70093","Chumireducens_DSM45392","Cimitans_DSM44264","Cjeike…	0.14858	0.14858	1.47854	0.14858	0.14858	1.47854	3330	0
ERS451417_01224	1717.62.peg.1232	NA	NA	NA	1	26	Catypicum_R2070,"Cbelfantii_FRC0043","Ccallunae_DSM20147","Cdeserti_GIMN1010","Cdiphtheriae_NCTC11397","Cdoosanense_DSM45436","Cefficiens_YS314","Cepidermidicanis_DSM45586","Cglutamicum_ATCC13032","Chalotolerans_YIM70093","Chumireducens_DSM45392","Cimitans_DSM44264","Ckutscheri_DSM20755","Cmarinum_DSM44953","Cmaris_DSM45190","Cmustelae_DSM45274","Cpseudotuberculosis_ATCC19410","CriegeliiPUDD83A45…	0.228747	0.228747	1.45753	0.228747	0.228747	1.45753	2	1	1. 0.43648;2. 137;3. 409;4. 181;5. 176;6. 526;7. 199;8. 595;9. 361;10. Y;11. TAT
ERS451417_00637	1717.62.peg.641	NA	NA	NA	1	38	Catypicum_R2070,"Caurimucosum_ATCC700975","Cbelfantii_FRC0043","Ccallunae_DSM20147","Ccamporealensis_DSM44610","Cdeserti_GIMN1010","Cdiphtheriae_NCTC11397","Cdoosanense_DSM45436","Cefficiens_YS314","Cepidermidicanis_DSM45586","Cfalsenii_DSM44353","Cglutamicum_ATCC13032","Cglycinophilum_AJ3170","Chalotolerans_YIM70093","Chumireducens_DSM45392","Cimitans_DSM44264","Cjeikeium_K41","Ckroppenstedtii_D…	0.141102	0.141102	1.30285	0.141102	0.141102	1.30285	2306	0
ERS451417_00842	1717.62.peg.847	NA	NA	NA	1	39	Cargentoratense_DSM44202,"Catypicum_R2070","Caurimucosum_ATCC700975","Cbelfantii_FRC0043","Ccallunae_DSM20147","Ccamporealensis_DSM44610","Cdeserti_GIMN1010","Cdiphtheriae_NCTC11397","Cdoosanense_DSM45436","Cefficiens_YS314","Cepidermidicanis_DSM45586","Cfalsenii_DSM44353","Cglutamicum_ATCC13032","Cglycinophilum_AJ3170","Chalotolerans_YIM70093","Chumireducens_DSM45392","Cimitans_DSM44264","Cjeike…	0.105136	0.105136	1.8076	0.105136	0.105136	1.80759	2	1	1. 0.42989;2. 243;3. 727;4. 246;5. 246;6. 736;7. 246;8. 736;9. 712;10. A;11. GCC
ERS451417_00722	1717.62.peg.727	NA	NA	NA	1	19	Caurimucosum_ATCC700975,"Cbelfantii_FRC0043","Ccamporealensis_DSM44610","Cdiphtheriae_NCTC11397","Cfalsenii_DSM44353","Cglycinophilum_AJ3170","Ckroppenstedtii_DSM44385","Ckutscheri_DSM20755","Cmustelae_DSM45274","Cpseudotuberculosis_31","Cpseudotuberculosis_ATCC19410","Crouxii_FRC0190","Csilvaticum_KL0182","Csimulans_PES1","Csingulare_IBSB52218","Cterpenotabidum_Y11","Culcerans_NCTC12077","Culcer…	0.0872101	0.0872101	2.02053	0.13099	0.0803766	1.99375	2	5	1. 0.45749;2. 17;3. 49;4. 43;5. 43;6. 127;7. 94;8. 280;9. 25;10. A;11. GCG	1. 0.4573;2. 44;3. 130;4. 70;5. 70;6. 208;7. 121;8. 361;9. 106;10. V;11. GTG	1. 0.53053;2. 176;3. 526;4. 202;5. 202;6. 604;7. 258;8. 772;9. 448;10. W;11. TGG	1. 0.50923;2. 231;3. 691;4. 257;5. 257;6. 769;7. 313;8. 937;9. 613;10. I;11. ATT	1. 0.5286;2. 250;3. 748;4. 276;5. 276;6. 826;7. 332;8. 994;9. 670;10. A;11. GCT
ERS451417_00998	1717.62.peg.1009	NA	NA	NA	1	39	Cargentoratense_DSM44202,"Catypicum_R2070","Caurimucosum_ATCC700975","Cbelfantii_FRC0043","Ccallunae_DSM20147","Ccamporealensis_DSM44610","Cdeserti_GIMN1010","Cdiphtheriae_NCTC11397","Cdoosanense_DSM45436","Cefficiens_YS314","Cepidermidicanis_DSM45586","Cfalsenii_DSM44353","Cglutamicum_ATCC13032","Cglycinophilum_AJ3170","Chalotolerans_YIM70093","Chumireducens_DSM45392","Cimitans_DSM44264","Cjeike…	0.114205	0.114205	1.79325	0.114205	0.114205	1.79323	258	0
ERS451417_00294	1717.62.peg.295	NA	NA	NA	1	39	Cargentoratense_DSM44202,"Catypicum_R2070","Caurimucosum_ATCC700975","Cbelfantii_FRC0043","Ccallunae_DSM20147","Ccamporealensis_DSM44610","Cdeserti_GIMN1010","Cdiphtheriae_NCTC11397","Cdoosanense_DSM45436","Cefficiens_YS314","Cepidermidicanis_DSM45586","Cfalsenii_DSM44353","Cglutamicum_ATCC13032","Cglycinophilum_AJ3170","Chalotolerans_YIM70093","Chumireducens_DSM45392","Cimitans_DSM44264","Cjeike…	0.13933	0.13933	1.67232	0.13933	0.13933	1.67232	2	2	1. 0.55589;2. 394;3. 1180;4. 452;5. 452;6. 1354;7. 495;8. 1483;9. 1087;10. G;11. GGC	1. 0.43074;2. 625;3. 1873;4. 687;5. 687;6. 2059;7. 737;8. 2209;9. 1675;10. E;11. GAA
ERS451417_00870	1717.62.peg.875	NA	NA	NA	1	32	Cargentoratense_DSM44202,"Catypicum_R2070","Caurimucosum_ATCC700975","Cbelfantii_FRC0043","Ccallunae_DSM20147","Ccamporealensis_DSM44610","Cdeserti_GIMN1010","Cdiphtheriae_NCTC11397","Cdoosanense_DSM45436","Cefficiens_YS314","Cepidermidicanis_DSM45586","Cglutamicum_ATCC13032","Chalotolerans_YIM70093","Chumireducens_DSM45392","Cimitans_DSM44264","Ckutscheri_DSM20755","Cmarinum_DSM44953","Cmaris_DS…	0.098594	0.098594	1.82729	0.0986036	0.0986036	1.82729	2306	0
ERS451417_00873	1717.62.peg.879	NA	NA	NA	1	8	Cbelfantii_FRC0043,"Cdiphtheriae_NCTC11397","Cpseudotuberculosis_31","Cpseudotuberculosis_ATCC19410","Crouxii_FRC0190","Csilvaticum_KL0182","Culcerans_NCTC12077","Culcerans_NCTC7910"	0.0963069	0.0963069	2.55894	0.0963069	0.0963069	2.55894	2	1	1. 0.44385;2. 373;3. 1117;4. 522;5. 409;6. 1225;7. 411;8. 1231;9. 1048;10. A;11. GCG
ERS451417_01226	1717.62.peg.1234	NA	NA	NA	1	39	Cargentoratense_DSM44202,"Catypicum_R2070","Caurimucosum_ATCC700975","Cbelfantii_FRC0043","Ccallunae_DSM20147","Ccamporealensis_DSM44610","Cdeserti_GIMN1010","Cdiphtheriae_NCTC11397","Cdoosanense_DSM45436","Cefficiens_YS314","Cepidermidicanis_DSM45586","Cfalsenii_DSM44353","Cglutamicum_ATCC13032","Cglycinophilum_AJ3170","Chalotolerans_YIM70093","Chumireducens_DSM45392","Cimitans_DSM44264","Cjeike…	0.152826	0.152826	2.06802	0.152826	0.152826	2.06803	2306	0
ERS451417_00215	1717.62.peg.212	NA	NA	NA	1	11	Cbelfantii_FRC0043,"Ccallunae_DSM20147","Cdiphtheriae_NCTC11397","Ckutscheri_DSM20755","Cmustelae_DSM45274","Cpseudotuberculosis_ATCC19410","Crouxii_FRC0190","Csilvaticum_KL0182","Culcerans_NCTC12077","Culcerans_NCTC7910","Cvitaeruminis_DSM20294"	0.0761721	0.0761721	2.36404	0.0761721	0.0761721	2.36404	258	0
ERS451417_00143	1717.62.peg.142	NA	NA	NA	1	39	Cargentoratense_DSM44202,"Catypicum_R2070","Caurimucosum_ATCC700975","Cbelfantii_FRC0043","Ccallunae_DSM20147","Ccamporealensis_DSM44610","Cdeserti_GIMN1010","Cdiphtheriae_NCTC11397","Cdoosanense_DSM45436","Cefficiens_YS314","Cepidermidicanis_DSM45586","Cfalsenii_DSM44353","Cglutamicum_ATCC13032","Cglycinophilum_AJ3170","Chalotolerans_YIM70093","Chumireducens_DSM45392","Cimitans_DSM44264","Cjeike…	0.131056	0.131056	1.69089	0.131056	0.131056	1.69089	1026	5	1. 0.4236;2. 31;3. 91;4. 57;5. 57;6. 169;7. 119;8. 355;9. 19;10. V;11. GTC	1. 0.40573;2. 120;3. 358;4. 168;5. 168;6. 502;7. 235;8. 703;9. 253;10. A;11. GCC	1. 0.57854;2. 157;3. 469;4. 219;5. 219;6. 655;7. 293;8. 877;9. 319;10. H;11. CAT	1. 0.44772;2. 304;3. 910;4. 368;5. 368;6. 1102;7. 442;8. 1324;9. 742;10. N;11. AAT	1. 0.44511;2. 311;3. 931;4. 375;5. 375;6. 1123;7. 449;8. 1345;9. 763;10. L;11. CTC
ERS451417_00872	1717.62.peg.878	NA	NA	NA	1	39	Cargentoratense_DSM44202,"Catypicum_R2070","Caurimucosum_ATCC700975","Cbelfantii_FRC0043","Ccallunae_DSM20147","Ccamporealensis_DSM44610","Cdeserti_GIMN1010","Cdiphtheriae_NCTC11397","Cdoosanense_DSM45436","Cefficiens_YS314","Cepidermidicanis_DSM45586","Cfalsenii_DSM44353","Cglutamicum_ATCC13032","Cglycinophilum_AJ3170","Chalotolerans_YIM70093","Chumireducens_DSM45392","Cimitans_DSM44264","Cjeike…	0.135516	0.135516	1.92009	0.135525	0.135525	1.92009	258	0
ERS451417_00460	1717.62.peg.464	NA	NA	NA	1	39	Cargentoratense_DSM44202,"Catypicum_R2070","Caurimucosum_ATCC700975","Cbelfantii_FRC0043","Ccallunae_DSM20147","Ccamporealensis_DSM44610","Cdeserti_GIMN1010","Cdiphtheriae_NCTC11397","Cdoosanense_DSM45436","Cefficiens_YS314","Cepidermidicanis_DSM45586","Cfalsenii_DSM44353","Cglutamicum_ATCC13032","Cglycinophilum_AJ3170","Chalotolerans_YIM70093","Chumireducens_DSM45392","Cimitans_DSM44264","Cjeike…	0.0963654	0.0963654	1.78677	0.0963654	0.0963654	1.78677	1282	0
ERS451417_00801	1717.62.peg.808	NA	NA	NA	1	37	Cargentoratense_DSM44202,"Catypicum_R2070","Caurimucosum_ATCC700975","Cbelfantii_FRC0043","Ccallunae_DSM20147","Ccamporealensis_DSM44610","Cdeserti_GIMN1010","Cdiphtheriae_NCTC11397","Cdoosanense_DSM45436","Cepidermidicanis_DSM45586","Cfalsenii_DSM44353","Cglutamicum_ATCC13032","Cglycinophilum_AJ3170","Chalotolerans_YIM70093","Chumireducens_DSM45392","Cimitans_DSM44264","Cjeikeium_K41","Ckroppens…	0.354584	0.354584	1.56269	0.354584	0.354584	1.56269	1282	0
ERS451417_00487	1717.62.peg.490	NA	NA	NA	1	17	Cbelfantii_FRC0043,"Ccallunae_DSM20147","Cdeserti_GIMN1010","Cdiphtheriae_NCTC11397","Cglutamicum_ATCC13032","Chalotolerans_YIM70093","Chumireducens_DSM45392","Cmarinum_DSM44953","Cmaris_DSM45190","Cpseudotuberculosis_31","Cpseudotuberculosis_ATCC19410","Crouxii_FRC0190","Csilvaticum_KL0182","Ctestudinoris_DSM44614","Culcerans_NCTC12077","Culcerans_NCTC7910","Cvitaeruminis_DSM20294"	0.331227	0.313049	2.44981	0.331227	0.313049	2.44981	2	2	1. 0.47877;2. 37;3. 109;4. 59;5. 38;6. 112;7. 38;8. 112;9. 88;10. T;11. ACC	1. 0.56009;2. 52;3. 154;4. 74;5. 53;6. 157;7. 53;8. 157;9. 133;10. F;11. TTC
ERS451417_00778	1717.62.peg.785	NA	NA	NA	1	39	Cargentoratense_DSM44202,"Catypicum_R2070","Caurimucosum_ATCC700975","Cbelfantii_FRC0043","Ccallunae_DSM20147","Ccamporealensis_DSM44610","Cdeserti_GIMN1010","Cdiphtheriae_NCTC11397","Cdoosanense_DSM45436","Cefficiens_YS314","Cepidermidicanis_DSM45586","Cfalsenii_DSM44353","Cglutamicum_ATCC13032","Cglycinophilum_AJ3170","Chalotolerans_YIM70093","Chumireducens_DSM45392","Cimitans_DSM44264","Cjeike…	0.192409	0.19139	1.82957	0.158157	0.158157	1.75716	3074	3	1. 0.46549;2. 129;3. 385;4. 174;5. 174;6. 520;7. 203;8. 607;9. 238;10. L;11. CTT	1. 0.43738;2. 239;3. 715;4. 284;5. 284;6. 850;7. 317;8. 949;9. 526;10. A;11. GCA	1. 0.4948;2. 255;3. 763;4. 300;5. 300;6. 898;7. 333;8. 997;9. 574;10. S;11. TCC
ERS451417_01202	1717.62.peg.1210	NA	NA	NA	1	39	Cargentoratense_DSM44202,"Catypicum_R2070","Caurimucosum_ATCC700975","Cbelfantii_FRC0043","Ccallunae_DSM20147","Ccamporealensis_DSM44610","Cdeserti_GIMN1010","Cdiphtheriae_NCTC11397","Cdoosanense_DSM45436","Cefficiens_YS314","Cepidermidicanis_DSM45586","Cfalsenii_DSM44353","Cglutamicum_ATCC13032","Cglycinophilum_AJ3170","Chalotolerans_YIM70093","Chumireducens_DSM45392","Cimitans_DSM44264","Cjeike…	0.149859	0.149859	1.5879	0.155179	0.149851	1.58798	3074	3	1. 0.51613;2. 231;3. 691;4. 272;5. 272;6. 814;7. 293;8. 877;9. 277;10. A;11. GCT	1. 0.43781;2. 451;3. 1351;4. 532;5. 532;6. 1594;7. 588;8. 1762;9. 916;10. D;11. GAC	1. 0.50515;2. 666;3. 1996;4. 775;5. 775;6. 2323;7. 858;8. 2572;9. 1444;10. D;11. GAT
ERS451417_00809	1717.62.peg.816	NA	NA	NA	1	18	Cargentoratense_DSM44202,"Caurimucosum_ATCC700975","Cbelfantii_FRC0043","Cdeserti_GIMN1010","Cdiphtheriae_NCTC11397","Cefficiens_YS314","Cepidermidicanis_DSM45586","Cfalsenii_DSM44353","Cglutamicum_ATCC13032","Cjeikeium_K41","Ckutscheri_DSM20755","Cmustelae_DSM45274","CriegeliiPUDD83A45","Crouxii_FRC0190","Csimulans_PES1","Csingulare_IBSB52218","Ctestudinoris_DSM44614","Curealyticum_DSM7109"	0.69746	0.310326	1.97542	0.313286	0.313286	1.97924	2306	0
ERS451417_00380	1717.62.peg.380	NA	NA	NA	1	3	Cdiphtheriae_NCTC11397,"Crouxii_FRC0190","Csimulans_PES1"	0.287524	0.287524	3.17859	0.287524	0.287524	3.17859	386	0
ERS451417_01167	1717.62.peg.1178	NA	NA	NA	1	39	Cargentoratense_DSM44202,"Catypicum_R2070","Caurimucosum_ATCC700975","Cbelfantii_FRC0043","Ccallunae_DSM20147","Ccamporealensis_DSM44610","Cdeserti_GIMN1010","Cdiphtheriae_NCTC11397","Cdoosanense_DSM45436","Cefficiens_YS314","Cepidermidicanis_DSM45586","Cfalsenii_DSM44353","Cglutamicum_ATCC13032","Cglycinophilum_AJ3170","Chalotolerans_YIM70093","Chumireducens_DSM45392","Cimitans_DSM44264","Cjeike…	0.144585	0.135219	1.88221	0.144585	0.135219	1.88221	2	2	1. 0.669;2. 347;3. 1039;4. 358;5. 358;6. 1072;7. 397;8. 1189;9. 1027;10. L;11. CTT	1. 0.63183;2. 412;3. 1234;4. 424;5. 424;6. 1270;7. 463;8. 1387;9. 1219;10. E;11. GAG
ERS451417_00894	1717.62.peg.900	NA	NA	NA	1	36	Cargentoratense_DSM44202,"Catypicum_R2070","Caurimucosum_ATCC700975","Cbelfantii_FRC0043","Ccallunae_DSM20147","Ccamporealensis_DSM44610","Cdeserti_GIMN1010","Cdiphtheriae_NCTC11397","Cdoosanense_DSM45436","Cefficiens_YS314","Cepidermidicanis_DSM45586","Cfalsenii_DSM44353","Cglutamicum_ATCC13032","Chalotolerans_YIM70093","Chumireducens_DSM45392","Cimitans_DSM44264","Cjeikeium_K41","Ckroppenstedti…	0.119738	0.119738	1.8978	0.119738	0.119738	1.8978	2	1	1. 0.61848;2. 372;3. 1114;4. 404;5. 404;6. 1210;7. 423;8. 1267;9. 901;10. D;11. GAC
ERS451417_00882	1717.62.peg.888	NA	NA	NA	1	36	Cargentoratense_DSM44202,"Catypicum_R2070","Caurimucosum_ATCC700975","Cbelfantii_FRC0043","Ccallunae_DSM20147","Ccamporealensis_DSM44610","Cdeserti_GIMN1010","Cdiphtheriae_NCTC11397","Cdoosanense_DSM45436","Cefficiens_YS314","Cfalsenii_DSM44353","Cglutamicum_ATCC13032","Cglycinophilum_AJ3170","Chalotolerans_YIM70093","Chumireducens_DSM45392","Cimitans_DSM44264","Cjeikeium_K41","Ckroppenstedtii_DS…	0.147577	0.147577	2.08102	0.147577	0.147577	2.08102	3330	0
ERS451417_00495	1717.62.peg.498	NA	NA	NA	1	39	Cargentoratense_DSM44202,"Catypicum_R2070","Caurimucosum_ATCC700975","Cbelfantii_FRC0043","Ccallunae_DSM20147","Ccamporealensis_DSM44610","Cdeserti_GIMN1010","Cdiphtheriae_NCTC11397","Cdoosanense_DSM45436","Cefficiens_YS314","Cepidermidicanis_DSM45586","Cfalsenii_DSM44353","Cglutamicum_ATCC13032","Cglycinophilum_AJ3170","Chalotolerans_YIM70093","Chumireducens_DSM45392","Cimitans_DSM44264","Cjeike…	0.147202	0.147202	2.07607	0.147202	0.147202	2.07607	258	0
ERS451417_00728	1717.62.peg.731	NA	NA	NA	1	14	Cbelfantii_FRC0043,"Ccallunae_DSM20147","Cdeserti_GIMN1010","Cdiphtheriae_NCTC11397","Cefficiens_YS314","Cglutamicum_ATCC13032","Ckutscheri_DSM20755","Cpseudotuberculosis_31","Cpseudotuberculosis_ATCC19410","Crouxii_FRC0190","Csilvaticum_KL0182","Culcerans_NCTC12077","Culcerans_NCTC7910","Cvitaeruminis_DSM20294"	0.0872764	0.0872472	1.82291	0.0872472	0.0872472	1.82291	258	0
ERS451417_00516	1717.62.peg.520	NA	NA	NA	1	10	Cbelfantii_FRC0043,"Cdiphtheriae_NCTC11397","Cjeikeium_K41","Clactis_RW25","Cpseudotuberculosis_31","Cpseudotuberculosis_ATCC19410","Crouxii_FRC0190","Csilvaticum_KL0182","Culcerans_NCTC12077","Culcerans_NCTC7910"	0.0933435	0.0416843	2.45362	0.0933435	0.0416843	2.45362	2050	4	1. 0.47497;2. 82;3. 244;4. 87;5. 87;6. 259;7. 108;8. 322;9. 85;10. S;11. TCC	1. 0.40437;2. 179;3. 535;4. 191;5. 184;6. 550;7. 205;8. 613;9. 376;10. A;11. GCG	1. 0.47141;2. 194;3. 580;4. 206;5. 199;6. 595;7. 220;8. 658;9. 421;10. W;11. TGG	1. 0.48558;2. 217;3. 649;4. 231;5. 222;6. 664;7. 243;8. 727;9. 490;10. Y;11. TAT
ERS451417_00028	1717.62.peg.25	NA	NA	NA	1	8	Cbelfantii_FRC0043,"Cdiphtheriae_NCTC11397","Cpseudotuberculosis_31","Cpseudotuberculosis_ATCC19410","Crouxii_FRC0190","Csilvaticum_KL0182","Culcerans_NCTC12077","Culcerans_NCTC7910"	0.91261	0.14862	3.37214	0.148972	0.148638	3.37214	256	0
ERS451417_00582	1717.62.peg.585	NA	NA	NA	1	39	Cargentoratense_DSM44202,"Catypicum_R2070","Caurimucosum_ATCC700975","Cbelfantii_FRC0043","Ccallunae_DSM20147","Ccamporealensis_DSM44610","Cdeserti_GIMN1010","Cdiphtheriae_NCTC11397","Cdoosanense_DSM45436","Cefficiens_YS314","Cepidermidicanis_DSM45586","Cfalsenii_DSM44353","Cglutamicum_ATCC13032","Cglycinophilum_AJ3170","Chalotolerans_YIM70093","Chumireducens_DSM45392","Cimitans_DSM44264","Cjeike…	0.115185	0.115185	2.04015	0.115185	0.115185	2.04014	258	0
ERS451417_00263	1717.62.peg.257	NA	NA	NA	1	32	Cargentoratense_DSM44202,"Catypicum_R2070","Cbelfantii_FRC0043","Ccallunae_DSM20147","Ccamporealensis_DSM44610","Cdeserti_GIMN1010","Cdiphtheriae_NCTC11397","Cdoosanense_DSM45436","Cefficiens_YS314","Cepidermidicanis_DSM45586","Cfalsenii_DSM44353","Cglutamicum_ATCC13032","Cglycinophilum_AJ3170","Chalotolerans_YIM70093","Chumireducens_DSM45392","Cimitans_DSM44264","Cjeikeium_K41","Cmarinum_DSM4495…	0.233373	0.233373	1.88734	0.233373	0.233373	1.88734	1026	1	1. 0.4932;2. 69;3. 205;4. 160;5. 152;6. 454;7. 273;8. 817;9. 100;10. R;11. CGC
ERS451417_00194	1717.62.peg.191	NA	NA	NA	1	19	Catypicum_R2070,"Cbelfantii_FRC0043","Ccamporealensis_DSM44610","Cdiphtheriae_NCTC11397","Cfalsenii_DSM44353","Ckroppenstedtii_DSM44385","Ckutscheri_DSM20755","Clactis_RW25","Cpseudotuberculosis_31","Cpseudotuberculosis_ATCC19410","CriegeliiPUDD83A45","Crouxii_FRC0190","Csilvaticum_KL0182","Csimulans_PES1","Ctestudinoris_DSM44614","Culcerans_NCTC12077","Culcerans_NCTC7910","Cuterequi_DSM45634","C…	0.178517	0.178517	1.98012	0.178517	0.178517	1.98012	2	2	1. 0.46854;2. 181;3. 541;4. 193;5. 193;6. 577;7. 222;8. 664;9. 502;10. V;11. GTG	1. 0.4125;2. 234;3. 700;4. 251;5. 251;6. 751;7. 280;8. 838;9. 646;10. I;11. ATC
ERS451417_00222	1717.62.peg.219	NA	NA	NA	1	3	Cbelfantii_FRC0043,"Cdiphtheriae_NCTC11397","Crouxii_FRC0190"	0.16624	0.16624	4.24862	0.16624	0.16624	4.24862	2434	0
ERS451417_01001	1717.62.peg.1012	NA	NA	NA	1	19	Cbelfantii_FRC0043,"Ccamporealensis_DSM44610","Cdiphtheriae_NCTC11397","Cefficiens_YS314","Cepidermidicanis_DSM45586","Chalotolerans_YIM70093","Chumireducens_DSM45392","Ckutscheri_DSM20755","Cmarinum_DSM44953","Cmustelae_DSM45274","Cpseudotuberculosis_31","Cpseudotuberculosis_ATCC19410","Crouxii_FRC0190","Csilvaticum_KL0182","Csimulans_PES1","Csingulare_IBSB52218","Ctestudinoris_DSM44614","Culcer…	0.124047	0.124047	2.19459	0.124047	0.124047	2.19459	3074	1	1. 0.62193;2. 32;3. 94;4. 60;5. 60;6. 178;7. 63;8. 187;9. 94;10. R;11. CGC
ERS451417_00863	1717.62.peg.868	NA	NA	NA	1	33	Cargentoratense_DSM44202,"Catypicum_R2070","Caurimucosum_ATCC700975","Cbelfantii_FRC0043","Ccallunae_DSM20147","Ccamporealensis_DSM44610","Cdeserti_GIMN1010","Cdiphtheriae_NCTC11397","Cdoosanense_DSM45436","Cefficiens_YS314","Cepidermidicanis_DSM45586","Cfalsenii_DSM44353","Cglutamicum_ATCC13032","Cglycinophilum_AJ3170","Chumireducens_DSM45392","Cimitans_DSM44264","Ckroppenstedtii_DSM44385","Ckut…	0.155654	0.155654	2.16708	0.155654	0.155654	2.16708	3074	1	1. 0.56656;2. 344;3. 1030;4. 450;5. 417;6. 1249;7. 587;8. 1759;9. 706;10. S;11. TCC
ERS451417_00971	1717.62.peg.979	NA	NA	NA	1	14	Cbelfantii_FRC0043,"Cdeserti_GIMN1010","Cdiphtheriae_NCTC11397","Cepidermidicanis_DSM45586","Cglutamicum_ATCC13032","Ckutscheri_DSM20755","Clactis_RW25","Cpseudotuberculosis_31","Cpseudotuberculosis_ATCC19410","Crouxii_FRC0190","Csilvaticum_KL0182","Ctestudinoris_DSM44614","Culcerans_NCTC12077","Culcerans_NCTC7910"	0.149149	0.14914	2.76726	0.149149	0.14914	2.76726	258	0
ERS451417_00977	1717.62.peg.987	NA	NA	NA	1	28	Catypicum_R2070,"Caurimucosum_ATCC700975","Cbelfantii_FRC0043","Ccallunae_DSM20147","Ccamporealensis_DSM44610","Cdeserti_GIMN1010","Cdiphtheriae_NCTC11397","Cdoosanense_DSM45436","Cefficiens_YS314","Cglutamicum_ATCC13032","Chumireducens_DSM45392","Cimitans_DSM44264","Ckutscheri_DSM20755","Cmarinum_DSM44953","Cmaris_DSM45190","Cmustelae_DSM45274","Cpseudotuberculosis_31","Cpseudotuberculosis_ATCC1…	0.212826	0.212826	1.79348	0.212826	0.212826	1.79348	3074	1	1. 0.50234;2. 108;3. 322;4. 146;5. 140;6. 418;7. 172;8. 514;9. 169;10. T;11. ACC
ERS451417_00492	1717.62.peg.495	NA	NA	NA	1	3	Cbelfantii_FRC0043,"Cdiphtheriae_NCTC11397","Crouxii_FRC0190"	0.39874	0.309671	3.91923	0.39875	0.309671	3.91923	386	0
ERS451417_00015	1717.62.peg.15	NA	NA	NA	1	7	Cdiphtheriae_NCTC11397,"Cpseudotuberculosis_31","Cpseudotuberculosis_ATCC19410","Crouxii_FRC0190","Csilvaticum_KL0182","Culcerans_NCTC12077","Culcerans_NCTC7910"	0.246828	0.246828	4.63999	0.246828	0.246828	4.63999	3074	1	1. 0.6941;2. 58;3. 172;4. 870;5. 100;6. 298;7. 103;8. 307;9. 103;10. T;11. ACC
ERS451417_00083	1717.62.peg.80	NA	NA	NA	1	3	Cdiphtheriae_NCTC11397,"Clactis_RW25","Crouxii_FRC0190"	1	0.286233	3.57895	1	0.286233	3.57895	128	2	1. 0.43273;2. 31;3. 91;4. 31;5. 31;6. 91;7. 31;8. 91;9. 67;10. I;11. ATT	1. 0.56377;2. 113;3. 337;4. 118;5. 118;6. 352;7. 118;8. 352;9. 304;10. D;11. GAT
ERS451417_00673	1717.62.peg.680	NA	NA	NA	1	16	Cargentoratense_DSM44202,"Cbelfantii_FRC0043","Cdiphtheriae_NCTC11397","Cefficiens_YS314","Cepidermidicanis_DSM45586","Ckroppenstedtii_DSM44385","Ckutscheri_DSM20755","Clactis_RW25","Cmustelae_DSM45274","Cpseudotuberculosis_31","Cpseudotuberculosis_ATCC19410","Crouxii_FRC0190","Csilvaticum_KL0182","Culcerans_NCTC12077","Culcerans_NCTC7910","Cvitaeruminis_DSM20294"	0.199114	0.199114	1.88923	0.199114	0.199114	1.88924	258	0
ERS451417_01143	1717.62.peg.1154	NA	NA	NA	1	12	Caurimucosum_ATCC700975,"Cbelfantii_FRC0043","Ccamporealensis_DSM44610","Cdiphtheriae_NCTC11397","Cepidermidicanis_DSM45586","Cglycinophilum_AJ3170","Cimitans_DSM44264","Crouxii_FRC0190","Csimulans_PES1","Csingulare_IBSB52218","Ctestudinoris_DSM44614","Cvitaeruminis_DSM20294"	0.211843	0.211843	2.16702	0.211843	0.211843	2.16702	2050	1	1. 0.48673;2. 23;3. 67;4. 41;5. 26;6. 76;7. 26;8. 76;9. 58;10. V;11. GTG
ERS451417_01203	1717.62.peg.1211	NA	NA	NA	1	39	Cargentoratense_DSM44202,"Catypicum_R2070","Caurimucosum_ATCC700975","Cbelfantii_FRC0043","Ccallunae_DSM20147","Ccamporealensis_DSM44610","Cdeserti_GIMN1010","Cdiphtheriae_NCTC11397","Cdoosanense_DSM45436","Cefficiens_YS314","Cepidermidicanis_DSM45586","Cfalsenii_DSM44353","Cglutamicum_ATCC13032","Cglycinophilum_AJ3170","Chalotolerans_YIM70093","Chumireducens_DSM45392","Cimitans_DSM44264","Cjeike…	0.597463	0.15623	1.98992	0.277158	0.15623	1.98992	2306	0
ERS451417_00755	1717.62.peg.760	NA	NA	NA	1	39	Cargentoratense_DSM44202,"Catypicum_R2070","Caurimucosum_ATCC700975","Cbelfantii_FRC0043","Ccallunae_DSM20147","Ccamporealensis_DSM44610","Cdeserti_GIMN1010","Cdiphtheriae_NCTC11397","Cdoosanense_DSM45436","Cefficiens_YS314","Cepidermidicanis_DSM45586","Cfalsenii_DSM44353","Cglutamicum_ATCC13032","Cglycinophilum_AJ3170","Chalotolerans_YIM70093","Chumireducens_DSM45392","Cimitans_DSM44264","Cjeike…	0.106177	0.106177	2.23575	0.105512	0.105512	2.27289	258	0
ERS451417_00308	1717.62.peg.309	NA	NA	NA	1	16	Caurimucosum_ATCC700975,"Cbelfantii_FRC0043","Ccamporealensis_DSM44610","Cdiphtheriae_NCTC11397","Cepidermidicanis_DSM45586","Chalotolerans_YIM70093","Cimitans_DSM44264","Ckroppenstedtii_DSM44385","Ckutscheri_DSM20755","CriegeliiPUDD83A45","Crouxii_FRC0190","Csimulans_PES1","Csingulare_IBSB52218","Curealyticum_DSM7109","Cureicelerivorans_IMMIBRIV2301","Cuterequi_DSM45634"	0.156843	0.156843	1.9738	0.156843	0.156843	1.9738	2	3	1. 0.45749;2. 96;3. 286;4. 110;5. 110;6. 328;7. 133;8. 397;9. 250;10. I;11. ATC	1. 0.49643;2. 117;3. 349;4. 131;5. 131;6. 391;7. 154;8. 460;9. 313;10. G;11. GGC	1. 0.44463;2. 271;3. 811;4. 296;5. 296;6. 886;7. 336;8. 1006;9. 631;10. M;11. ATG
ERS451417_01014	1717.62.peg.1025	NA	NA	NA	1	38	Cargentoratense_DSM44202,"Catypicum_R2070","Caurimucosum_ATCC700975","Cbelfantii_FRC0043","Ccallunae_DSM20147","Ccamporealensis_DSM44610","Cdeserti_GIMN1010","Cdiphtheriae_NCTC11397","Cdoosanense_DSM45436","Cefficiens_YS314","Cepidermidicanis_DSM45586","Cfalsenii_DSM44353","Cglutamicum_ATCC13032","Cglycinophilum_AJ3170","Chalotolerans_YIM70093","Chumireducens_DSM45392","Cimitans_DSM44264","Cjeike…	0.288451	0.207031	1.80453	0.288451	0.207031	1.80453	2	1	1. 0.78047;2. 180;3. 538;4. 221;5. 221;6. 661;7. 237;8. 709;9. 253;10. A;11. GCG
ERS451417_00411	1717.62.peg.411	NA	NA	NA	1	36	Cargentoratense_DSM44202,"Catypicum_R2070","Cbelfantii_FRC0043","Ccallunae_DSM20147","Cdeserti_GIMN1010","Cdiphtheriae_NCTC11397","Cdoosanense_DSM45436","Cefficiens_YS314","Cepidermidicanis_DSM45586","Cfalsenii_DSM44353","Cglutamicum_ATCC13032","Cglycinophilum_AJ3170","Chalotolerans_YIM70093","Chumireducens_DSM45392","Cimitans_DSM44264","Cjeikeium_K41","Ckroppenstedtii_DSM44385","Ckutscheri_DSM20…	0.0853027	0.0853027	1.72804	0.0853027	0.0853027	1.72805	258	0
ERS451417_00208	1717.62.peg.205	NA	NA	NA	1	37	Cargentoratense_DSM44202,"Catypicum_R2070","Caurimucosum_ATCC700975","Cbelfantii_FRC0043","Ccallunae_DSM20147","Ccamporealensis_DSM44610","Cdeserti_GIMN1010","Cdiphtheriae_NCTC11397","Cdoosanense_DSM45436","Cefficiens_YS314","Cepidermidicanis_DSM45586","Cfalsenii_DSM44353","Cglutamicum_ATCC13032","Cglycinophilum_AJ3170","Chalotolerans_YIM70093","Chumireducens_DSM45392","Cimitans_DSM44264","Cjeike…	0.145366	0.145366	1.72383	0.145375	0.145375	1.72383	1026	2	1. 0.51666;2. 357;3. 1069;4. 427;5. 413;6. 1237;7. 497;8. 1489;9. 982;10. Y;11. TAC	1. 0.53738;2. 460;3. 1378;4. 605;5. 542;6. 1624;7. 668;8. 2002;9. 1150;10. E;11. GAG
ERS451417_00343	1717.62.peg.346	NA	NA	NA	1	39	Cargentoratense_DSM44202,"Catypicum_R2070","Caurimucosum_ATCC700975","Cbelfantii_FRC0043","Ccallunae_DSM20147","Ccamporealensis_DSM44610","Cdeserti_GIMN1010","Cdiphtheriae_NCTC11397","Cdoosanense_DSM45436","Cefficiens_YS314","Cepidermidicanis_DSM45586","Cfalsenii_DSM44353","Cglutamicum_ATCC13032","Cglycinophilum_AJ3170","Chalotolerans_YIM70093","Chumireducens_DSM45392","Cimitans_DSM44264","Cjeike…	0.458186	0.0713299	2.24581	0.0714526	0.0714526	2.23023	1282	0
ERS451417_00250	1717.62.peg.245	NA	NA	NA	1	8	Cbelfantii_FRC0043,"Cdiphtheriae_NCTC11397","Cpseudotuberculosis_31","Cpseudotuberculosis_ATCC19410","Crouxii_FRC0190","Csilvaticum_KL0182","Culcerans_NCTC12077","Culcerans_NCTC7910"	0.196967	0.164791	5.24421	0.196967	0.164791	5.24421	2050	2	1. 0.47655;2. 55;3. 163;4. 59;5. 59;6. 175;7. 59;8. 175;9. 25;10. A;11. GCG	1. 0.4645;2. 87;3. 259;4. 92;5. 91;6. 271;7. 91;8. 271;9. 121;10. V;11. GTG
ERS451417_00338	1717.62.peg.340	NA	NA	NA	1	5	Cdiphtheriae_NCTC11397,"Ckutscheri_DSM20755","Cmustelae_DSM45274","Crouxii_FRC0190","Cvitaeruminis_DSM20294"	1	0.118029	2.02585	0.259415	0.118029	2.02581	256	0
ERS451417_01054	1717.62.peg.1064	NA	NA	NA	1	39	Cargentoratense_DSM44202,"Catypicum_R2070","Caurimucosum_ATCC700975","Cbelfantii_FRC0043","Ccallunae_DSM20147","Ccamporealensis_DSM44610","Cdeserti_GIMN1010","Cdiphtheriae_NCTC11397","Cdoosanense_DSM45436","Cefficiens_YS314","Cepidermidicanis_DSM45586","Cfalsenii_DSM44353","Cglutamicum_ATCC13032","Cglycinophilum_AJ3170","Chalotolerans_YIM70093","Chumireducens_DSM45392","Cimitans_DSM44264","Cjeike…	1	0.14622	1.41524	0.99999	0.146219	1.41524	3072	1	1. 0.70183;2. 92;3. 274;4. 106;5. 106;6. 316;7. 128;8. 382;9. 193;10. T;11. ACG
ERS451417_01272	1717.62.peg.1280	NA	NA	NA	1	17	Cargentoratense_DSM44202,"Cbelfantii_FRC0043","Cdiphtheriae_NCTC11397","Cefficiens_YS314","Cepidermidicanis_DSM45586","Cglutamicum_ATCC13032","Ckroppenstedtii_DSM44385","Ckutscheri_DSM20755","Clactis_RW25","Cmustelae_DSM45274","Cpseudotuberculosis_31","Cpseudotuberculosis_ATCC19410","Crouxii_FRC0190","Csilvaticum_KL0182","Culcerans_NCTC12077","Culcerans_NCTC7910","Cvitaeruminis_DSM20294"	0.142957	0.0700096	2.10565	0.142957	0.0700096	2.10565	2	2	1. 0.60166;2. 74;3. 220;4. 79;5. 79;6. 235;7. 85;8. 253;9. 202;10. V;11. GTT	1. 0.62548;2. 109;3. 325;4. 114;5. 114;6. 340;7. 120;8. 358;9. 307;10. A;11. GCG
ERS451417_00079	1717.62.peg.76	NA	NA	NA	1	11	Cargentoratense_DSM44202,"Cbelfantii_FRC0043","Cdiphtheriae_NCTC11397","Cimitans_DSM44264","Cjeikeium_K41","Clactis_RW25","Cmustelae_DSM45274","CriegeliiPUDD83A45","Crouxii_FRC0190","Csimulans_PES1","Cureicelerivorans_IMMIBRIV2301"	0.142512	0.142512	1.57872	0.142512	0.142512	1.57872	2	3	1. 0.43024;2. 177;3. 529;4. 201;5. 201;6. 601;7. 220;8. 658;9. 403;10. T;11. ACC	1. 0.40757;2. 190;3. 568;4. 214;5. 214;6. 640;7. 233;8. 697;9. 442;10. Q;11. CAG	1. 0.49618;2. 197;3. 589;4. 221;5. 221;6. 661;7. 240;8. 718;9. 463;10. N;11. AAC
ERS451417_01152	1717.62.peg.1163	NA	NA	NA	1	39	Cargentoratense_DSM44202,"Catypicum_R2070","Caurimucosum_ATCC700975","Cbelfantii_FRC0043","Ccallunae_DSM20147","Ccamporealensis_DSM44610","Cdeserti_GIMN1010","Cdiphtheriae_NCTC11397","Cdoosanense_DSM45436","Cefficiens_YS314","Cepidermidicanis_DSM45586","Cfalsenii_DSM44353","Cglutamicum_ATCC13032","Cglycinophilum_AJ3170","Chalotolerans_YIM70093","Chumireducens_DSM45392","Cimitans_DSM44264","Cjeike…	0.113391	0.113391	1.56979	0.113391	0.113391	1.56979	2	3	1. 0.76181;2. 255;3. 763;4. 284;5. 284;6. 850;7. 295;8. 883;9. 706;10. M;11. ATG	1. 0.63915;2. 335;3. 1003;4. 364;5. 364;6. 1090;7. 375;8. 1123;9. 943;10. G;11. GGT	1. 0.6422;2. 347;3. 1039;4. 376;5. 376;6. 1126;7. 387;8. 1159;9. 979;10. E;11. GAG
ERS451417_00313	1717.62.peg.314	NA	NA	NA	1	38	Catypicum_R2070,"Caurimucosum_ATCC700975","Cbelfantii_FRC0043","Ccallunae_DSM20147","Ccamporealensis_DSM44610","Cdeserti_GIMN1010","Cdiphtheriae_NCTC11397","Cdoosanense_DSM45436","Cefficiens_YS314","Cepidermidicanis_DSM45586","Cfalsenii_DSM44353","Cglutamicum_ATCC13032","Cglycinophilum_AJ3170","Chalotolerans_YIM70093","Chumireducens_DSM45392","Cimitans_DSM44264","Cjeikeium_K41","Ckroppenstedtii_D…	0.126792	0.126792	2.10058	0.126792	0.126792	2.10058	2	1	1. 0.5386;2. 59;3. 175;4. 71;5. 71;6. 211;7. 75;8. 223;9. 139;10. S;11. TCG
ERS451417_00961	1717.62.peg.968	NA	NA	NA	1	39	Cargentoratense_DSM44202,"Catypicum_R2070","Caurimucosum_ATCC700975","Cbelfantii_FRC0043","Ccallunae_DSM20147","Ccamporealensis_DSM44610","Cdeserti_GIMN1010","Cdiphtheriae_NCTC11397","Cdoosanense_DSM45436","Cefficiens_YS314","Cepidermidicanis_DSM45586","Cfalsenii_DSM44353","Cglutamicum_ATCC13032","Cglycinophilum_AJ3170","Chalotolerans_YIM70093","Chumireducens_DSM45392","Cimitans_DSM44264","Cjeike…	0.153876	0.153876	1.47423	0.153876	0.153876	1.47423	258	0
ERS451417_00911	1717.62.peg.918	NA	NA	NA	1	9	Cbelfantii_FRC0043,"Cdiphtheriae_NCTC11397","Ckutscheri_DSM20755","Cpseudotuberculosis_ATCC19410","Crouxii_FRC0190","Csilvaticum_KL0182","Culcerans_NCTC12077","Culcerans_NCTC7910","Cvitaeruminis_DSM20294"	0.268241	0.268241	2.20461	0.314074	0.267495	2.20732	2050	2	1. 0.65;2. 154;3. 460;4. 184;5. 168;6. 502;7. 177;8. 529;9. 355;10. A;11. GCT	1. 0.49044;2. 161;3. 481;4. 191;5. 175;6. 523;7. 184;8. 550;9. 376;10. A;11. GCT
ERS451417_00488	1717.62.peg.491	NA	NA	NA	1	3	Cbelfantii_FRC0043,"Cdiphtheriae_NCTC11397","Crouxii_FRC0190"	0.13575	0.13575	4.90029	0.13575	0.13575	4.90028	386	0
ERS451417_00860	1717.62.peg.865	NA	NA	NA	1	27	Cargentoratense_DSM44202,"Catypicum_R2070","Caurimucosum_ATCC700975","Cbelfantii_FRC0043","Ccallunae_DSM20147","Ccamporealensis_DSM44610","Cdeserti_GIMN1010","Cdiphtheriae_NCTC11397","Cdoosanense_DSM45436","Cefficiens_YS314","Cfalsenii_DSM44353","Cglutamicum_ATCC13032","Chumireducens_DSM45392","Cimitans_DSM44264","Ckroppenstedtii_DSM44385","Ckutscheri_DSM20755","Cmarinum_DSM44953","Cmustelae_DSM4…	0.153922	0.153922	1.49225	0.153922	0.153922	1.49226	2	2	1. 0.57909;2. 77;3. 229;4. 129;5. 92;6. 274;7. 133;8. 397;9. 109;10. E;11. GAG	1. 0.52641;2. 494;3. 1480;4. 571;5. 525;6. 1573;7. 570;8. 1708;9. 1267;10. A;11. GCT
ERS451417_00096	1717.62.peg.94	NA	NA	NA	1	11	Cbelfantii_FRC0043,"Cdiphtheriae_NCTC11397","Chalotolerans_YIM70093","Cmustelae_DSM45274","Cpseudotuberculosis_31","Cpseudotuberculosis_ATCC19410","Crouxii_FRC0190","Csilvaticum_KL0182","Culcerans_NCTC12077","Culcerans_NCTC7910","Cvitaeruminis_DSM20294"	0.132466	0.132466	2.49272	0.132466	0.132466	2.49272	2	3	1. 0.5333;2. 41;3. 121;4. 85;5. 85;6. 253;7. 111;8. 331;9. 79;10. E;11. GAG	1. 0.45339;2. 107;3. 319;4. 157;5. 155;6. 463;7. 182;8. 544;9. 250;10. A;11. GCG	1. 0.60797;2. 149;3. 445;4. 209;5. 197;6. 589;7. 224;8. 670;9. 376;10. R;11. CGC
ERS451417_00965	1717.62.peg.972	NA	NA	NA	1	39	Cargentoratense_DSM44202,"Catypicum_R2070","Caurimucosum_ATCC700975","Cbelfantii_FRC0043","Ccallunae_DSM20147","Ccamporealensis_DSM44610","Cdeserti_GIMN1010","Cdiphtheriae_NCTC11397","Cdoosanense_DSM45436","Cefficiens_YS314","Cepidermidicanis_DSM45586","Cfalsenii_DSM44353","Cglutamicum_ATCC13032","Cglycinophilum_AJ3170","Chalotolerans_YIM70093","Chumireducens_DSM45392","Cimitans_DSM44264","Cjeike…	0.122718	0.122718	1.70761	0.122718	0.122718	1.70762	3074	1	1. 0.41479;2. 161;3. 481;4. 189;5. 189;6. 565;7. 236;8. 706;9. 265;10. R;11. CGT
ERS451417_00335	1717.62.peg.337	NA	NA	NA	1	36	Cargentoratense_DSM44202,"Catypicum_R2070","Caurimucosum_ATCC700975","Cbelfantii_FRC0043","Ccallunae_DSM20147","Ccamporealensis_DSM44610","Cdeserti_GIMN1010","Cdiphtheriae_NCTC11397","Cdoosanense_DSM45436","Cefficiens_YS314","Cepidermidicanis_DSM45586","Cglutamicum_ATCC13032","Cglycinophilum_AJ3170","Chalotolerans_YIM70093","Chumireducens_DSM45392","Cimitans_DSM44264","Cjeikeium_K41","Ckroppenste…	0.128455	0.128455	2.30679	0.128455	0.128455	2.30679	3330	0
ERS451417_00274	1717.62.peg.271	NA	NA	NA	1	6	Cdiphtheriae_NCTC11397,"Chumireducens_DSM45392","CriegeliiPUDD83A45","Crouxii_FRC0190","Csingulare_IBSB52218","Ctestudinoris_DSM44614"	0.315193	0.250749	1.67379	0.315193	0.250749	1.67379	2	3	1. 0.79702;2. 168;3. 502;4. 190;5. 184;6. 550;7. 204;8. 610;9. 403;10. G;11. GGT	1. 0.6542;2. 241;3. 721;4. 266;5. 257;6. 769;7. 277;8. 829;9. 622;10. E;11. GAA	1. 0.44395;2. 350;3. 1048;4. 388;5. 366;6. 1096;7. 386;8. 1156;9. 946;10. T;11. ACA
ERS451417_00451	1717.62.peg.455	NA	NA	NA	1	10	Cbelfantii_FRC0043,"Ccamporealensis_DSM44610","Cdiphtheriae_NCTC11397","Cepidermidicanis_DSM45586","Cpseudotuberculosis_31","Crouxii_FRC0190","Csilvaticum_KL0182","Ctestudinoris_DSM44614","Culcerans_NCTC12077","Culcerans_NCTC7910"	30.0949	0.162941	3.24014	0.16295	0.16295	3.23987	256	0
ERS451417_00262	1717.62.peg.256	NA	NA	NA	1	39	Cargentoratense_DSM44202,"Catypicum_R2070","Caurimucosum_ATCC700975","Cbelfantii_FRC0043","Ccallunae_DSM20147","Ccamporealensis_DSM44610","Cdeserti_GIMN1010","Cdiphtheriae_NCTC11397","Cdoosanense_DSM45436","Cefficiens_YS314","Cepidermidicanis_DSM45586","Cfalsenii_DSM44353","Cglutamicum_ATCC13032","Cglycinophilum_AJ3170","Chalotolerans_YIM70093","Chumireducens_DSM45392","Cimitans_DSM44264","Cjeike…	0.181351	0.167913	2.26526	0.181352	0.167914	2.26526	2050	2	1. 0.60193;2. 91;3. 271;4. 101;5. 101;6. 301;7. 136;8. 406;9. 82;10. D;11. GAT	1. 0.58444;2. 496;3. 1486;4. 520;5. 520;6. 1558;7. 560;8. 1678;9. 1159;10. L;11. CTT
ERS451417_01231	1717.62.peg.1239	NA	NA	NA	1	13	Cargentoratense_DSM44202,"Cbelfantii_FRC0043","Cdiphtheriae_NCTC11397","Cepidermidicanis_DSM45586","Ckutscheri_DSM20755","Cmustelae_DSM45274","Cpseudotuberculosis_31","Cpseudotuberculosis_ATCC19410","Crouxii_FRC0190","Csilvaticum_KL0182","Culcerans_NCTC12077","Culcerans_NCTC7910","Cvitaeruminis_DSM20294"	0.184044	0.183995	2.33671	0.184005	0.183996	2.33671	3330	0
ERS451417_00511	1717.62.peg.515	NA	NA	NA	1	33	Cargentoratense_DSM44202,"Catypicum_R2070","Caurimucosum_ATCC700975","Cbelfantii_FRC0043","Ccallunae_DSM20147","Ccamporealensis_DSM44610","Cdeserti_GIMN1010","Cdiphtheriae_NCTC11397","Cdoosanense_DSM45436","Cefficiens_YS314","Cepidermidicanis_DSM45586","Cglutamicum_ATCC13032","Cglycinophilum_AJ3170","Chalotolerans_YIM70093","Chumireducens_DSM45392","Cimitans_DSM44264","Ckutscheri_DSM20755","Cmari…	0.175446	0.175446	1.77006	0.175446	0.175446	1.77006	1026	1	1. 0.43393;2. 21;3. 61;4. 36;5. 36;6. 106;7. 68;8. 202;9. 28;10. T;11. ACC
ERS451417_00946	1717.62.peg.953	NA	NA	NA	1	39	Cargentoratense_DSM44202,"Catypicum_R2070","Caurimucosum_ATCC700975","Cbelfantii_FRC0043","Ccallunae_DSM20147","Ccamporealensis_DSM44610","Cdeserti_GIMN1010","Cdiphtheriae_NCTC11397","Cdoosanense_DSM45436","Cefficiens_YS314","Cepidermidicanis_DSM45586","Cfalsenii_DSM44353","Cglutamicum_ATCC13032","Cglycinophilum_AJ3170","Chalotolerans_YIM70093","Chumireducens_DSM45392","Cimitans_DSM44264","Cjeike…	0.148584	0.148584	1.83161	0.148584	0.148584	1.83161	258	0
ERS451417_01164	1717.62.peg.1175	NA	NA	NA	1	37	Cargentoratense_DSM44202,"Catypicum_R2070","Caurimucosum_ATCC700975","Cbelfantii_FRC0043","Ccallunae_DSM20147","Ccamporealensis_DSM44610","Cdeserti_GIMN1010","Cdiphtheriae_NCTC11397","Cdoosanense_DSM45436","Cefficiens_YS314","Cfalsenii_DSM44353","Cglutamicum_ATCC13032","Cglycinophilum_AJ3170","Chalotolerans_YIM70093","Chumireducens_DSM45392","Cimitans_DSM44264","Cjeikeium_K41","Ckroppenstedtii_DS…	0.855017	0.171217	1.61367	0.854902	0.171207	1.61367	3072	2	1. 0.53264;2. 108;3. 322;4. 130;5. 129;6. 385;7. 200;8. 598;9. 184;10. G;11. GGT	1. 0.89916;2. 233;3. 697;4. 256;5. 255;6. 763;7. 326;8. 976;9. 478;10. T;11. ACA
ERS451417_00966	1717.62.peg.974	NA	NA	NA	1	17	Cargentoratense_DSM44202,"Cbelfantii_FRC0043","Cdiphtheriae_NCTC11397","Cefficiens_YS314","Cepidermidicanis_DSM45586","Cglutamicum_ATCC13032","Ckroppenstedtii_DSM44385","Ckutscheri_DSM20755","Clactis_RW25","Cmustelae_DSM45274","Cpseudotuberculosis_31","Cpseudotuberculosis_ATCC19410","Crouxii_FRC0190","Csilvaticum_KL0182","Culcerans_NCTC12077","Culcerans_NCTC7910","Cvitaeruminis_DSM20294"	0.171036	0.171036	2.51283	0.171036	0.171036	2.51283	258	0
ERS451417_00584	1717.62.peg.588	NA	NA	NA	1	33	Cargentoratense_DSM44202,"Caurimucosum_ATCC700975","Cbelfantii_FRC0043","Ccallunae_DSM20147","Ccamporealensis_DSM44610","Cdeserti_GIMN1010","Cdiphtheriae_NCTC11397","Cefficiens_YS314","Cepidermidicanis_DSM45586","Cfalsenii_DSM44353","Cglutamicum_ATCC13032","Chalotolerans_YIM70093","Chumireducens_DSM45392","Cimitans_DSM44264","Cjeikeium_K41","Ckroppenstedtii_DSM44385","Ckutscheri_DSM20755","Clacti…	0.0907226	0.0907226	2.28508	0.0907226	0.0907226	2.28508	3330	0
ERS451417_00398	1717.62.peg.398	NA	NA	NA	1	39	Cargentoratense_DSM44202,"Catypicum_R2070","Caurimucosum_ATCC700975","Cbelfantii_FRC0043","Ccallunae_DSM20147","Ccamporealensis_DSM44610","Cdeserti_GIMN1010","Cdiphtheriae_NCTC11397","Cdoosanense_DSM45436","Cefficiens_YS314","Cepidermidicanis_DSM45586","Cfalsenii_DSM44353","Cglutamicum_ATCC13032","Cglycinophilum_AJ3170","Chalotolerans_YIM70093","Chumireducens_DSM45392","Cimitans_DSM44264","Cjeike…	0.131678	0.131678	1.67139	0.131678	0.131678	1.67139	258	0
ERS451417_01045	1717.62.peg.1055	NA	NA	NA	1	39	Cargentoratense_DSM44202,"Catypicum_R2070","Caurimucosum_ATCC700975","Cbelfantii_FRC0043","Ccallunae_DSM20147","Ccamporealensis_DSM44610","Cdeserti_GIMN1010","Cdiphtheriae_NCTC11397","Cdoosanense_DSM45436","Cefficiens_YS314","Cepidermidicanis_DSM45586","Cfalsenii_DSM44353","Cglutamicum_ATCC13032","Cglycinophilum_AJ3170","Chalotolerans_YIM70093","Chumireducens_DSM45392","Cimitans_DSM44264","Cjeike…	0.409364	0.242652	1.54586	0.409364	0.242652	1.54586	2	3	1. 0.51625;2. 47;3. 139;4. 108;5. 108;6. 322;7. 149;8. 445;9. 97;10. T;11. ACC	1. 0.77412;2. 125;3. 373;4. 186;5. 186;6. 556;7. 227;8. 679;9. 328;10. A;11. GCG	1. 0.8262;2. 228;3. 682;4. 289;5. 289;6. 865;7. 330;8. 988;9. 637;10. M;11. ATG
ERS451417_00930	1717.62.peg.937	NA	NA	NA	1	3	Cbelfantii_FRC0043,"Cdiphtheriae_NCTC11397","Crouxii_FRC0190"	0.168412	0.168412	3.50792	0.168412	0.168412	3.50792	130	2	1. 0.40675;2. 166;3. 496;4. 199;5. 166;6. 496;7. 166;8. 496;9. 496;10. N;11. AAC	1. 0.50495;2. 616;3. 1846;4. 816;5. 616;6. 1846;7. 616;8. 1846;9. 1846;10. N;11. AAC
ERS451417_00365	1717.62.peg.364	NA	NA	NA	1	22	Catypicum_R2070,"Caurimucosum_ATCC700975","Cbelfantii_FRC0043","Ccamporealensis_DSM44610","Cdiphtheriae_NCTC11397","Cepidermidicanis_DSM45586","Cimitans_DSM44264","Cjeikeium_K41","Ckutscheri_DSM20755","Clactis_RW25","Cmustelae_DSM45274","Cpseudotuberculosis_31","Cpseudotuberculosis_ATCC19410","CriegeliiPUDD83A45","Crouxii_FRC0190","Csilvaticum_KL0182","Csimulans_PES1","Csingulare_IBSB52218","Ctes…	0.171573	0.171573	2.00928	0.171573	0.171573	2.00928	1282	0
ERS451417_01159	1717.62.peg.1170	NA	NA	NA	1	39	Cargentoratense_DSM44202,"Catypicum_R2070","Caurimucosum_ATCC700975","Cbelfantii_FRC0043","Ccallunae_DSM20147","Ccamporealensis_DSM44610","Cdeserti_GIMN1010","Cdiphtheriae_NCTC11397","Cdoosanense_DSM45436","Cefficiens_YS314","Cepidermidicanis_DSM45586","Cfalsenii_DSM44353","Cglutamicum_ATCC13032","Cglycinophilum_AJ3170","Chalotolerans_YIM70093","Chumireducens_DSM45392","Cimitans_DSM44264","Cjeike…	0.219125	0.219125	1.74687	0.219125	0.219125	1.74687	2	1	1. 0.67464;2. 92;3. 274;4. 97;5. 97;6. 289;7. 106;8. 316;9. 244;10. R;11. CGT
ERS451417_00575	1717.62.peg.578	NA	NA	NA	1	39	Cargentoratense_DSM44202,"Catypicum_R2070","Caurimucosum_ATCC700975","Cbelfantii_FRC0043","Ccallunae_DSM20147","Ccamporealensis_DSM44610","Cdeserti_GIMN1010","Cdiphtheriae_NCTC11397","Cdoosanense_DSM45436","Cefficiens_YS314","Cepidermidicanis_DSM45586","Cfalsenii_DSM44353","Cglutamicum_ATCC13032","Cglycinophilum_AJ3170","Chalotolerans_YIM70093","Chumireducens_DSM45392","Cimitans_DSM44264","Cjeike…	0.951157	0.126743	2.27788	0.253603	0.126743	2.27788	256	0
ERS451417_00732	1717.62.peg.735	NA	NA	NA	1	39	Cargentoratense_DSM44202,"Catypicum_R2070","Caurimucosum_ATCC700975","Cbelfantii_FRC0043","Ccallunae_DSM20147","Ccamporealensis_DSM44610","Cdeserti_GIMN1010","Cdiphtheriae_NCTC11397","Cdoosanense_DSM45436","Cefficiens_YS314","Cepidermidicanis_DSM45586","Cfalsenii_DSM44353","Cglutamicum_ATCC13032","Cglycinophilum_AJ3170","Chalotolerans_YIM70093","Chumireducens_DSM45392","Cimitans_DSM44264","Cjeike…	0.177882	0.177882	1.71981	0.177882	0.177882	1.71981	2	2	1. 0.44513;2. 94;3. 280;4. 106;5. 106;6. 316;7. 157;8. 469;9. 250;10. E;11. GAA	1. 0.54529;2. 204;3. 610;4. 216;5. 216;6. 646;7. 267;8. 799;9. 580;10. G;11. GGC
ERS451417_00596	1717.62.peg.600	NA	NA	NA	1	30	Cargentoratense_DSM44202,"Caurimucosum_ATCC700975","Cbelfantii_FRC0043","Ccallunae_DSM20147","Ccamporealensis_DSM44610","Cdeserti_GIMN1010","Cdiphtheriae_NCTC11397","Cdoosanense_DSM45436","Cefficiens_YS314","Cepidermidicanis_DSM45586","Cglutamicum_ATCC13032","Chalotolerans_YIM70093","Chumireducens_DSM45392","Cimitans_DSM44264","Ckutscheri_DSM20755","Clactis_RW25","Cmarinum_DSM44953","Cmaris_DSM45…	0.0790109	0.0790109	2.1223	0.0790109	0.0790109	2.1223	2	2	1. 0.42663;2. 250;3. 748;4. 275;5. 275;6. 823;7. 302;8. 904;9. 604;10. E;11. GAA	1. 0.46041;2. 488;3. 1462;4. 516;5. 516;6. 1546;7. 600;8. 1798;9. 1186;10. Q;11. CAA
ERS451417_00471	1717.62.peg.475	NA	NA	NA	1	15	Caurimucosum_ATCC700975,"Cbelfantii_FRC0043","Ccallunae_DSM20147","Cdiphtheriae_NCTC11397","Cglutamicum_ATCC13032","Cimitans_DSM44264","Ckutscheri_DSM20755","Clactis_RW25","Cpseudotuberculosis_31","CriegeliiPUDD83A45","Crouxii_FRC0190","Csilvaticum_KL0182","Culcerans_NCTC12077","Culcerans_NCTC7910","Cvitaeruminis_DSM20294"	0.237135	0.237135	2.41778	0.237135	0.237135	2.41778	2	1	1. 0.44737;2. 289;3. 865;4. 294;5. 294;6. 880;7. 295;8. 883;9. 670;10. M;11. ATG
ERS451417_00504	1717.62.peg.508	NA	NA	NA	1	22	Caurimucosum_ATCC700975,"Cbelfantii_FRC0043","Ccallunae_DSM20147","Cdeserti_GIMN1010","Cdiphtheriae_NCTC11397","Cefficiens_YS314","Cglutamicum_ATCC13032","Chumireducens_DSM45392","Cjeikeium_K41","Ckutscheri_DSM20755","Cmarinum_DSM44953","Cmaris_DSM45190","Cpseudotuberculosis_31","Cpseudotuberculosis_ATCC19410","Crouxii_FRC0190","Csilvaticum_KL0182","Csingulare_IBSB52218","Ctestudinoris_DSM44614",…	0.121931	0.121931	1.95684	0.121931	0.121931	1.95684	2	1	1. 0.59898;2. 516;3. 1546;4. 555;5. 555;6. 1663;7. 563;8. 1687;9. 1333;10. T;11. ACC
ERS451417_00125	1717.62.peg.123	NA	NA	NA	1	3	Cbelfantii_FRC0043,"Cdiphtheriae_NCTC11397","Crouxii_FRC0190"	0.262648	0.03288	5.19436	0.262648	0.03288	5.19436	130	10	1. 0.41245;2. 22;3. 64;4. 22;5. 22;6. 64;7. 22;8. 64;9. 64;10. I;11. ATA	1. 0.46277;2. 30;3. 88;4. 30;5. 30;6. 88;7. 30;8. 88;9. 88;10. S;11. TCG	1. 0.48198;2. 32;3. 94;4. 32;5. 32;6. 94;7. 32;8. 94;9. 94;10. H;11. CAC	1. 0.50458;2. 46;3. 136;4. 46;5. 46;6. 136;7. 46;8. 136;9. 136;10. R;11. CGC	1. 0.40351;2. 51;3. 151;4. 51;5. 51;6. 151;7. 51;8. 151;9. 151;10. D;11. GAT	1. 0.51976;2. 56;3. 166;4. 56;5. 56;6. 166;7. 56;8. 166;9. 166;10. E;11. GAA	1. 0.62453;2. 66;3. 196;4. 66;5. 66;6. 196;7. 66;8. 196;9. 196;10. D;11. GAT	1. 0.42249;2. 81;3. 241;4. 81;5. 81;6. 241;7. 81;8. 241;9. 241;10. G;11. GGC	1. 0.42591;2. 126;3. 376;4. 126;5. 126;6. 376;7. 126;8. 376;9. 376;10. L;11. TTG	1. 0.42133;2. 127;3. 379;4. 127;5. 127;6. 379;7. 127;8. 379;9. 379;10. S;11. AGC
ERS451417_00861	1717.62.peg.866	NA	NA	NA	1	31	Cargentoratense_DSM44202,"Catypicum_R2070","Caurimucosum_ATCC700975","Cbelfantii_FRC0043","Ccallunae_DSM20147","Ccamporealensis_DSM44610","Cdeserti_GIMN1010","Cdiphtheriae_NCTC11397","Cdoosanense_DSM45436","Cefficiens_YS314","Cepidermidicanis_DSM45586","Cfalsenii_DSM44353","Cglutamicum_ATCC13032","Cglycinophilum_AJ3170","Chumireducens_DSM45392","Cimitans_DSM44264","Ckroppenstedtii_DSM44385","Ckut…	0.113855	0.105418	1.88734	0.113855	0.105418	1.88734	2	3	1. 0.48008;2. 45;3. 133;4. 48;5. 47;6. 139;7. 47;8. 139;9. 130;10. T;11. ACC	1. 0.50094;2. 127;3. 379;4. 131;5. 129;6. 385;7. 129;8. 385;9. 376;10. I;11. ATA	1. 0.45489;2. 153;3. 457;4. 157;5. 155;6. 463;7. 155;8. 463;9. 454;10. F;11. TTC
ERS451417_00677	1717.62.peg.684	NA	NA	NA	1	39	Cargentoratense_DSM44202,"Catypicum_R2070","Caurimucosum_ATCC700975","Cbelfantii_FRC0043","Ccallunae_DSM20147","Ccamporealensis_DSM44610","Cdeserti_GIMN1010","Cdiphtheriae_NCTC11397","Cdoosanense_DSM45436","Cefficiens_YS314","Cepidermidicanis_DSM45586","Cfalsenii_DSM44353","Cglutamicum_ATCC13032","Cglycinophilum_AJ3170","Chalotolerans_YIM70093","Chumireducens_DSM45392","Cimitans_DSM44264","Cjeike…	0.0765887	0.0765887	1.66885	0.0765887	0.0765887	1.66885	258	0
ERS451417_00902	1717.62.peg.908	NA	NA	NA	1	32	Cargentoratense_DSM44202,"Catypicum_R2070","Cbelfantii_FRC0043","Ccallunae_DSM20147","Cdeserti_GIMN1010","Cdiphtheriae_NCTC11397","Cdoosanense_DSM45436","Cefficiens_YS314","Cepidermidicanis_DSM45586","Cfalsenii_DSM44353","Cglutamicum_ATCC13032","Cglycinophilum_AJ3170","Chalotolerans_YIM70093","Chumireducens_DSM45392","Cjeikeium_K41","Ckroppenstedtii_DSM44385","Ckutscheri_DSM20755","Clactis_RW25",…	0.0964438	0.0964438	1.849	0.0964438	0.0964438	1.849	258	0
ERS451417_00631	1717.62.peg.635	NA	NA	NA	1	14	Cargentoratense_DSM44202,"Cbelfantii_FRC0043","Ccallunae_DSM20147","Cdiphtheriae_NCTC11397","Cefficiens_YS314","Chalotolerans_YIM70093","Ckutscheri_DSM20755","Cmustelae_DSM45274","Cpseudotuberculosis_ATCC19410","Crouxii_FRC0190","Csilvaticum_KL0182","Ctestudinoris_DSM44614","Culcerans_NCTC7910","Cvitaeruminis_DSM20294"	0.0828317	0.0828317	1.78211	0.0828317	0.0828317	1.78211	2050	2	1. 0.45527;2. 174;3. 520;4. 210;5. 196;6. 586;7. 223;8. 667;9. 352;10. Q;11. CAA	1. 0.43326;2. 218;3. 652;4. 254;5. 240;6. 718;7. 267;8. 799;9. 457;10. S;11. TCG
ERS451417_00399	1717.62.peg.399	NA	NA	NA	1	39	Cargentoratense_DSM44202,"Catypicum_R2070","Caurimucosum_ATCC700975","Cbelfantii_FRC0043","Ccallunae_DSM20147","Ccamporealensis_DSM44610","Cdeserti_GIMN1010","Cdiphtheriae_NCTC11397","Cdoosanense_DSM45436","Cefficiens_YS314","Cepidermidicanis_DSM45586","Cfalsenii_DSM44353","Cglutamicum_ATCC13032","Cglycinophilum_AJ3170","Chalotolerans_YIM70093","Chumireducens_DSM45392","Cimitans_DSM44264","Cjeike…	0.521664	0.151152	1.86006	0.151	0.151	1.85769	258	0
ERS451417_00071	1717.62.peg.67	NA	NA	NA	1	15	Caurimucosum_ATCC700975,"Cbelfantii_FRC0043","Cdiphtheriae_NCTC11397","Cepidermidicanis_DSM45586","Ckutscheri_DSM20755","Clactis_RW25","Cmustelae_DSM45274","Cpseudotuberculosis_31","Cpseudotuberculosis_ATCC19410","CriegeliiPUDD83A45","Crouxii_FRC0190","Csilvaticum_KL0182","Culcerans_NCTC12077","Culcerans_NCTC7910","Cvitaeruminis_DSM20294"	0.31722	0.31722	2.41704	0.31722	0.31722	2.41704	2	1	1. 0.59614;2. 46;3. 136;4. 67;5. 67;6. 199;7. 90;8. 268;9. 118;10. V;11. GTA
ERS451417_01044	1717.62.peg.1054	NA	NA	NA	1	34	Cargentoratense_DSM44202,"Catypicum_R2070","Caurimucosum_ATCC700975","Cbelfantii_FRC0043","Ccallunae_DSM20147","Ccamporealensis_DSM44610","Cdeserti_GIMN1010","Cdiphtheriae_NCTC11397","Cdoosanense_DSM45436","Cefficiens_YS314","Cepidermidicanis_DSM45586","Cfalsenii_DSM44353","Cglutamicum_ATCC13032","Cglycinophilum_AJ3170","Chalotolerans_YIM70093","Chumireducens_DSM45392","Cimitans_DSM44264","Cjeike…	0.529715	0.198792	1.94329	0.199034	0.199034	1.94232	3330	0
ERS451417_00890	1717.62.peg.896	NA	NA	NA	1	34	Cargentoratense_DSM44202,"Catypicum_R2070","Caurimucosum_ATCC700975","Cbelfantii_FRC0043","Ccallunae_DSM20147","Ccamporealensis_DSM44610","Cdeserti_GIMN1010","Cdiphtheriae_NCTC11397","Cdoosanense_DSM45436","Cefficiens_YS314","Cepidermidicanis_DSM45586","Cglutamicum_ATCC13032","Chalotolerans_YIM70093","Chumireducens_DSM45392","Cimitans_DSM44264","Ckroppenstedtii_DSM44385","Ckutscheri_DSM20755","Cl…	0.224191	0.0558295	1.59	0.129155	0.0558295	1.59	2306	0
ERS451417_00633	1717.62.peg.637	NA	NA	NA	1	39	Cargentoratense_DSM44202,"Catypicum_R2070","Caurimucosum_ATCC700975","Cbelfantii_FRC0043","Ccallunae_DSM20147","Ccamporealensis_DSM44610","Cdeserti_GIMN1010","Cdiphtheriae_NCTC11397","Cdoosanense_DSM45436","Cefficiens_YS314","Cepidermidicanis_DSM45586","Cfalsenii_DSM44353","Cglutamicum_ATCC13032","Cglycinophilum_AJ3170","Chalotolerans_YIM70093","Chumireducens_DSM45392","Cimitans_DSM44264","Cjeike…	0.116902	0.116902	1.60465	0.116902	0.116902	1.60465	3330	0
ERS451417_00261	1717.62.peg.255	NA	NA	NA	1	8	Cbelfantii_FRC0043,"Cdiphtheriae_NCTC11397","Cepidermidicanis_DSM45586","Cpseudotuberculosis_31","Cpseudotuberculosis_ATCC19410","Crouxii_FRC0190","Culcerans_NCTC12077","Culcerans_NCTC7910"	0.279728	0.279728	3.50946	0.279728	0.279728	3.50947	2	1	1. 0.49326;2. 95;3. 283;4. 114;5. 102;6. 304;7. 105;8. 313;9. 247;10. I;11. ATC
ERS451417_01155	1717.62.peg.1166	NA	NA	NA	1	39	Cargentoratense_DSM44202,"Catypicum_R2070","Caurimucosum_ATCC700975","Cbelfantii_FRC0043","Ccallunae_DSM20147","Ccamporealensis_DSM44610","Cdeserti_GIMN1010","Cdiphtheriae_NCTC11397","Cdoosanense_DSM45436","Cefficiens_YS314","Cepidermidicanis_DSM45586","Cfalsenii_DSM44353","Cglutamicum_ATCC13032","Cglycinophilum_AJ3170","Chalotolerans_YIM70093","Chumireducens_DSM45392","Cimitans_DSM44264","Cjeike…	0.0658143	0.0658143	1.55708	0.0658143	0.0658143	1.55708	258	0
ERS451417_00402	1717.62.peg.402	NA	NA	NA	1	39	Cargentoratense_DSM44202,"Catypicum_R2070","Caurimucosum_ATCC700975","Cbelfantii_FRC0043","Ccallunae_DSM20147","Ccamporealensis_DSM44610","Cdeserti_GIMN1010","Cdiphtheriae_NCTC11397","Cdoosanense_DSM45436","Cefficiens_YS314","Cepidermidicanis_DSM45586","Cfalsenii_DSM44353","Cglutamicum_ATCC13032","Cglycinophilum_AJ3170","Chalotolerans_YIM70093","Chumireducens_DSM45392","Cimitans_DSM44264","Cjeike…	0.110053	0.110053	2.35319	0.110053	0.110053	2.35315	258	0
ERS451417_00253	1717.62.peg.248	NA	NA	NA	1	9	Cargentoratense_DSM44202,"Cbelfantii_FRC0043","Cdiphtheriae_NCTC11397","Ckroppenstedtii_DSM44385","Cmustelae_DSM45274","Crouxii_FRC0190","Csilvaticum_KL0182","Culcerans_NCTC12077","Culcerans_NCTC7910"	0.087225	0.087225	2.06636	0.087225	0.087225	2.06636	2	2	1. 0.42803;2. 147;3. 439;4. 158;5. 154;6. 460;7. 167;8. 499;9. 295;10. P;11. CCA	1. 0.5791;2. 439;3. 1315;4. 495;5. 474;6. 1420;7. 505;8. 1513;9. 1072;10. T;11. ACG
ERS451417_01230	1717.62.peg.1238	NA	NA	NA	1	15	Cargentoratense_DSM44202,"Cbelfantii_FRC0043","Cdiphtheriae_NCTC11397","Cepidermidicanis_DSM45586","Ckroppenstedtii_DSM44385","Ckutscheri_DSM20755","Clactis_RW25","Cmustelae_DSM45274","Cpseudotuberculosis_31","Cpseudotuberculosis_ATCC19410","Crouxii_FRC0190","Csilvaticum_KL0182","Culcerans_NCTC12077","Culcerans_NCTC7910","Cvitaeruminis_DSM20294"	0.138761	0.138761	2.18536	0.138761	0.138761	2.18535	2	2	1. 0.64195;2. 373;3. 1117;4. 464;5. 437;6. 1309;7. 458;8. 1372;9. 973;10. A;11. GCA	1. 0.60936;2. 1175;3. 3523;4. 1294;5. 1260;6. 3778;7. 1348;8. 4042;9. 3184;10. A;11. GCC
ERS451417_00075	1717.62.peg.72	NA	NA	NA	1	10	Cbelfantii_FRC0043,"Cdiphtheriae_NCTC11397","Cepidermidicanis_DSM45586","Clactis_RW25","Cpseudotuberculosis_31","Cpseudotuberculosis_ATCC19410","Crouxii_FRC0190","Csilvaticum_KL0182","Culcerans_NCTC12077","Culcerans_NCTC7910"	0.0931251	0.0931251	3.76119	0.0931251	0.0931251	3.76123	258	0
ERS451417_00349	1717.62.peg.352	NA	NA	NA	1	13	Cbelfantii_FRC0043,"Cdiphtheriae_NCTC11397","Cepidermidicanis_DSM45586","Ckroppenstedtii_DSM44385","Clactis_RW25","Cpseudotuberculosis_31","Cpseudotuberculosis_ATCC19410","Crouxii_FRC0190","Csilvaticum_KL0182","Csimulans_PES1","Ctestudinoris_DSM44614","Culcerans_NCTC12077","Culcerans_NCTC7910"	0.111449	0.111449	1.89179	0.111449	0.111449	1.89179	2	1	1. 0.4198;2. 72;3. 214;4. 77;5. 77;6. 229;7. 78;8. 232;9. 193;10. D;11. GAC
ERS451417_00390	1717.62.peg.390	NA	NA	NA	1	39	Cargentoratense_DSM44202,"Catypicum_R2070","Caurimucosum_ATCC700975","Cbelfantii_FRC0043","Ccallunae_DSM20147","Ccamporealensis_DSM44610","Cdeserti_GIMN1010","Cdiphtheriae_NCTC11397","Cdoosanense_DSM45436","Cefficiens_YS314","Cepidermidicanis_DSM45586","Cfalsenii_DSM44353","Cglutamicum_ATCC13032","Cglycinophilum_AJ3170","Chalotolerans_YIM70093","Chumireducens_DSM45392","Cimitans_DSM44264","Cjeike…	0.075161	0.075161	2.19362	0.075161	0.075161	2.19362	258	0
ERS451417_00210	1717.62.peg.207	NA	NA	NA	1	6	Cbelfantii_FRC0043,"Cdiphtheriae_NCTC11397","Cmustelae_DSM45274","Cpseudotuberculosis_31","Cpseudotuberculosis_ATCC19410","Crouxii_FRC0190"	0.182274	0.115256	4.36072	0.182274	0.115256	4.36072	2	7	1. 0.65616;2. 141;3. 421;4. 149;5. 149;6. 445;7. 155;8. 463;9. 256;10. S;11. TCG	1. 0.43715;2. 143;3. 427;4. 151;5. 151;6. 451;7. 157;8. 469;9. 262;10. R;11. CGT	1. 0.63032;2. 245;3. 733;4. 260;5. 260;6. 778;7. 266;8. 796;9. 565;10. L;11. CTT	1. 0.54392;2. 261;3. 781;4. 276;5. 276;6. 826;7. 282;8. 844;9. 613;10. A;11. GCG	1. 0.57408;2. 311;3. 931;4. 326;5. 326;6. 976;7. 332;8. 994;9. 763;10. V;11. GTG	1. 0.58456;2. 336;3. 1006;4. 351;5. 351;6. 1051;7. 357;8. 1069;9. 838;10. L;11. TTG	1. 0.61027;2. 351;3. 1051;4. 366;5. 366;6. 1096;7. 372;8. 1114;9. 883;10. L;11. TTG
ERS451417_00563	1717.62.peg.566	NA	NA	NA	1	39	Cargentoratense_DSM44202,"Catypicum_R2070","Caurimucosum_ATCC700975","Cbelfantii_FRC0043","Ccallunae_DSM20147","Ccamporealensis_DSM44610","Cdeserti_GIMN1010","Cdiphtheriae_NCTC11397","Cdoosanense_DSM45436","Cefficiens_YS314","Cepidermidicanis_DSM45586","Cfalsenii_DSM44353","Cglutamicum_ATCC13032","Cglycinophilum_AJ3170","Chalotolerans_YIM70093","Chumireducens_DSM45392","Cimitans_DSM44264","Cjeike…	0.152976	0.152976	1.67292	0.152976	0.152976	1.67293	2	3	1. 0.52054;2. 440;3. 1318;4. 447;5. 447;6. 1339;7. 455;8. 1363;9. 1147;10. A;11. GCA	1. 0.53606;2. 624;3. 1870;4. 638;5. 638;6. 1912;7. 646;8. 1936;9. 1660;10. V;11. GTA	1. 0.40095;2. 647;3. 1939;4. 661;5. 661;6. 1981;7. 669;8. 2005;9. 1729;10. A;11. GCT
ERS451417_01010	1717.62.peg.1021	NA	NA	NA	1	39	Cargentoratense_DSM44202,"Catypicum_R2070","Caurimucosum_ATCC700975","Cbelfantii_FRC0043","Ccallunae_DSM20147","Ccamporealensis_DSM44610","Cdeserti_GIMN1010","Cdiphtheriae_NCTC11397","Cdoosanense_DSM45436","Cefficiens_YS314","Cepidermidicanis_DSM45586","Cfalsenii_DSM44353","Cglutamicum_ATCC13032","Cglycinophilum_AJ3170","Chalotolerans_YIM70093","Chumireducens_DSM45392","Cimitans_DSM44264","Cjeike…	0.226972	0.201246	1.88581	0.226972	0.201246	1.88581	2	1	1. 0.72505;2. 277;3. 829;4. 277;5. 277;6. 829;7. 277;8. 829;9. 826;10. K;11. AAG
ERS451417_00158	1717.62.peg.156	NA	NA	NA	1	12	Cdiphtheriae_NCTC11397,"Cmustelae_DSM45274","Cpseudotuberculosis_31","Cpseudotuberculosis_ATCC19410","Crouxii_FRC0190","Csilvaticum_KL0182","Csimulans_PES1","Csingulare_IBSB52218","Culcerans_NCTC12077","Culcerans_NCTC7910","Curealyticum_DSM7109","Cvitaeruminis_DSM20294"	0.204881	0.204881	2.27267	0.204881	0.204881	2.27267	3074	2	1. 0.63625;2. 81;3. 241;4. 99;5. 87;6. 259;7. 133;8. 397;9. 133;10. D;11. GAC	1. 0.57884;2. 84;3. 250;4. 102;5. 90;6. 268;7. 136;8. 406;9. 142;10. S;11. TCC
ERS451417_00632	1717.62.peg.636	NA	NA	NA	1	9	Cbelfantii_FRC0043,"Cdiphtheriae_NCTC11397","Cpseudotuberculosis_31","Cpseudotuberculosis_ATCC19410","Crouxii_FRC0190","Csilvaticum_KL0182","Culcerans_NCTC12077","Culcerans_NCTC7910","Cvitaeruminis_DSM20294"	0.112459	0.112459	2.7809	0.112459	0.112459	2.78089	258	0
ERS451417_00559	1717.62.peg.563	NA	NA	NA	1	22	Cargentoratense_DSM44202,"Caurimucosum_ATCC700975","Cbelfantii_FRC0043","Cdeserti_GIMN1010","Cdiphtheriae_NCTC11397","Cglutamicum_ATCC13032","Cglycinophilum_AJ3170","Cimitans_DSM44264","Cjeikeium_K41","Ckutscheri_DSM20755","Cmustelae_DSM45274","Cpseudotuberculosis_31","Cpseudotuberculosis_ATCC19410","CriegeliiPUDD83A45","Crouxii_FRC0190","Csilvaticum_KL0182","Csimulans_PES1","Csingulare_IBSB52218…	0.154424	0.154424	2.73359	0.154424	0.154424	2.7336	3330	0
ERS451417_00750	1717.62.peg.755	NA	NA	NA	1	22	Cargentoratense_DSM44202,"Cbelfantii_FRC0043","Ccallunae_DSM20147","Cdeserti_GIMN1010","Cdiphtheriae_NCTC11397","Cefficiens_YS314","Cepidermidicanis_DSM45586","Cglutamicum_ATCC13032","Chalotolerans_YIM70093","Chumireducens_DSM45392","Ckroppenstedtii_DSM44385","Ckutscheri_DSM20755","Clactis_RW25","Cmarinum_DSM44953","Cmustelae_DSM45274","Cpseudotuberculosis_31","Cpseudotuberculosis_ATCC19410","Cro…	0.194273	0.194273	1.70844	0.194273	0.194273	1.70844	258	0
ERS451417_00489	1717.62.peg.492	NA	NA	NA	1	3	Cbelfantii_FRC0043,"Cdiphtheriae_NCTC11397","Crouxii_FRC0190"	0.245102	0.245102	4.20236	0.245102	0.245102	4.2024	386	0
ERS451417_00713	1717.62.peg.718	NA	NA	NA	1	39	Cargentoratense_DSM44202,"Catypicum_R2070","Caurimucosum_ATCC700975","Cbelfantii_FRC0043","Ccallunae_DSM20147","Ccamporealensis_DSM44610","Cdeserti_GIMN1010","Cdiphtheriae_NCTC11397","Cdoosanense_DSM45436","Cefficiens_YS314","Cepidermidicanis_DSM45586","Cfalsenii_DSM44353","Cglutamicum_ATCC13032","Cglycinophilum_AJ3170","Chalotolerans_YIM70093","Chumireducens_DSM45392","Cimitans_DSM44264","Cjeike…	0.11197	0.11197	1.88591	0.11197	0.11197	1.88591	258	0
ERS451417_00512	1717.62.peg.516	NA	NA	NA	1	8	Cbelfantii_FRC0043,"Cdiphtheriae_NCTC11397","Cpseudotuberculosis_31","Cpseudotuberculosis_ATCC19410","Crouxii_FRC0190","Csilvaticum_KL0182","Culcerans_NCTC12077","Culcerans_NCTC7910"	0.0801617	0.0801617	3.74579	0.0801617	0.0801617	3.74579	2306	0
ERS451417_00843	1717.62.peg.848	NA	NA	NA	1	39	Cargentoratense_DSM44202,"Catypicum_R2070","Caurimucosum_ATCC700975","Cbelfantii_FRC0043","Ccallunae_DSM20147","Ccamporealensis_DSM44610","Cdeserti_GIMN1010","Cdiphtheriae_NCTC11397","Cdoosanense_DSM45436","Cefficiens_YS314","Cepidermidicanis_DSM45586","Cfalsenii_DSM44353","Cglutamicum_ATCC13032","Cglycinophilum_AJ3170","Chalotolerans_YIM70093","Chumireducens_DSM45392","Cimitans_DSM44264","Cjeike…	0.145812	0.145812	1.8183	0.145812	0.145812	1.8183	258	0
ERS451417_00348	1717.62.peg.351	NA	NA	NA	1	39	Cargentoratense_DSM44202,"Catypicum_R2070","Caurimucosum_ATCC700975","Cbelfantii_FRC0043","Ccallunae_DSM20147","Ccamporealensis_DSM44610","Cdeserti_GIMN1010","Cdiphtheriae_NCTC11397","Cdoosanense_DSM45436","Cefficiens_YS314","Cepidermidicanis_DSM45586","Cfalsenii_DSM44353","Cglutamicum_ATCC13032","Cglycinophilum_AJ3170","Chalotolerans_YIM70093","Chumireducens_DSM45392","Cimitans_DSM44264","Cjeike…	0.100548	0.100548	1.80108	0.100548	0.100548	1.80108	258	0
ERS451417_00647	1717.62.peg.652	NA	NA	NA	1	16	Cbelfantii_FRC0043,"Ccallunae_DSM20147","Cdeserti_GIMN1010","Cdiphtheriae_NCTC11397","Cefficiens_YS314","Cglutamicum_ATCC13032","Chalotolerans_YIM70093","Ckutscheri_DSM20755","Cmustelae_DSM45274","Cpseudotuberculosis_31","Cpseudotuberculosis_ATCC19410","Crouxii_FRC0190","Csilvaticum_KL0182","Culcerans_NCTC12077","Culcerans_NCTC7910","Cvitaeruminis_DSM20294"	0.112985	0.112985	2.14912	0.112985	0.112985	2.14912	2	2	1. 0.5015;2. 44;3. 130;4. 74;5. 53;6. 157;7. 52;8. 154;9. 67;10. V;11. GTA	1. 0.45317;2. 72;3. 214;4. 103;5. 81;6. 241;7. 80;8. 238;9. 145;10. V;11. GTG
ERS451417_00807	1717.62.peg.814	NA	NA	NA	1	23	Catypicum_R2070,"Caurimucosum_ATCC700975","Cbelfantii_FRC0043","Ccallunae_DSM20147","Ccamporealensis_DSM44610","Cdeserti_GIMN1010","Cdiphtheriae_NCTC11397","Cdoosanense_DSM45436","Cefficiens_YS314","Cepidermidicanis_DSM45586","Cglutamicum_ATCC13032","Chalotolerans_YIM70093","Chumireducens_DSM45392","Cmarinum_DSM44953","Cmaris_DSM45190","Cpseudotuberculosis_ATCC19410","Crouxii_FRC0190","Csilvaticu…	0.371309	0.371309	1.9245	0.371316	0.371316	1.9245	2050	1	1. 0.62972;2. 232;3. 694;4. 263;5. 259;6. 775;7. 266;8. 796;9. 583;10. Q;11. CAA
ERS451417_00746	1717.62.peg.749	NA	NA	NA	1	39	Cargentoratense_DSM44202,"Catypicum_R2070","Caurimucosum_ATCC700975","Cbelfantii_FRC0043","Ccallunae_DSM20147","Ccamporealensis_DSM44610","Cdeserti_GIMN1010","Cdiphtheriae_NCTC11397","Cdoosanense_DSM45436","Cefficiens_YS314","Cepidermidicanis_DSM45586","Cfalsenii_DSM44353","Cglutamicum_ATCC13032","Cglycinophilum_AJ3170","Chalotolerans_YIM70093","Chumireducens_DSM45392","Cimitans_DSM44264","Cjeike…	0.210374	0.19963	1.67245	0.210375	0.19964	1.67245	2	1	1. 0.6332;2. 346;3. 1036;4. 392;5. 392;6. 1174;7. 474;8. 1420;9. 817;10. E;11. GAG
ERS451417_00765	1717.62.peg.770	NA	NA	NA	1	3	Cbelfantii_FRC0043,"Cdiphtheriae_NCTC11397","Crouxii_FRC0190"	0.208792	0.147471	4.04972	0.208792	0.147471	4.04972	130	4	1. 0.4173;2. 32;3. 94;4. 79;5. 32;6. 94;7. 32;8. 94;9. 91;10. L;11. CTA	1. 0.40678;2. 86;3. 256;4. 161;5. 86;6. 256;7. 86;8. 256;9. 253;10. A;11. GCA	1. 0.41632;2. 147;3. 439;4. 223;5. 147;6. 439;7. 147;8. 439;9. 436;10. V;11. GTG	1. 0.66808;2. 176;3. 526;4. 272;5. 176;6. 526;7. 176;8. 526;9. 523;10. A;11. GCC
ERS451417_01273	1717.62.peg.1281	NA	NA	NA	1	17	Cargentoratense_DSM44202,"Cbelfantii_FRC0043","Cdiphtheriae_NCTC11397","Cefficiens_YS314","Cepidermidicanis_DSM45586","Cglutamicum_ATCC13032","Ckroppenstedtii_DSM44385","Ckutscheri_DSM20755","Clactis_RW25","Cmustelae_DSM45274","Cpseudotuberculosis_31","Cpseudotuberculosis_ATCC19410","Crouxii_FRC0190","Csilvaticum_KL0182","Culcerans_NCTC12077","Culcerans_NCTC7910","Cvitaeruminis_DSM20294"	0.0973196	0.0973196	2.21867	0.0973196	0.0973196	2.21868	258	0
ERS451417_00590	1717.62.peg.593	NA	NA	NA	1	14	Cbelfantii_FRC0043,"Ccallunae_DSM20147","Cdeserti_GIMN1010","Cdiphtheriae_NCTC11397","Cefficiens_YS314","Cglutamicum_ATCC13032","Chalotolerans_YIM70093","Cmustelae_DSM45274","Cpseudotuberculosis_ATCC19410","Crouxii_FRC0190","Csilvaticum_KL0182","Culcerans_NCTC12077","Culcerans_NCTC7910","Cvitaeruminis_DSM20294"	0.0727111	0.0727111	2.20081	0.0727111	0.0727111	2.20081	2	1	1. 0.53376;2. 102;3. 304;4. 143;5. 102;6. 304;7. 127;8. 379;9. 229;10. S;11. TCA
ERS451417_00629	1717.62.peg.633	NA	NA	NA	1	38	Cargentoratense_DSM44202,"Caurimucosum_ATCC700975","Cbelfantii_FRC0043","Ccallunae_DSM20147","Ccamporealensis_DSM44610","Cdeserti_GIMN1010","Cdiphtheriae_NCTC11397","Cdoosanense_DSM45436","Cefficiens_YS314","Cepidermidicanis_DSM45586","Cfalsenii_DSM44353","Cglutamicum_ATCC13032","Cglycinophilum_AJ3170","Chalotolerans_YIM70093","Chumireducens_DSM45392","Cimitans_DSM44264","Cjeikeium_K41","Ckroppen…	0.0979692	0.0979692	1.92261	0.0979692	0.0979692	1.92261	258	0
ERS451417_00737	1717.62.peg.740	NA	NA	NA	1	13	Cbelfantii_FRC0043,"Ccallunae_DSM20147","Cdeserti_GIMN1010","Cdiphtheriae_NCTC11397","Cefficiens_YS314","Cepidermidicanis_DSM45586","Cglutamicum_ATCC13032","Chumireducens_DSM45392","Clactis_RW25","Cmarinum_DSM44953","Cmustelae_DSM45274","Crouxii_FRC0190","Ctestudinoris_DSM44614"	0.0927273	0.0927273	1.53685	0.0927273	0.0927273	1.53685	258	0
ERS451417_00246	1717.62.peg.241	NA	NA	NA	1	13	Cbelfantii_FRC0043,"Cdiphtheriae_NCTC11397","Cimitans_DSM44264","Cmarinum_DSM44953","Cmustelae_DSM45274","Cpseudotuberculosis_31","Cpseudotuberculosis_ATCC19410","CriegeliiPUDD83A45","Crouxii_FRC0190","Culcerans_NCTC12077","Culcerans_NCTC7910","Cureicelerivorans_IMMIBRIV2301","Cuterequi_DSM45634"	0.513714	0.361952	1.94427	0.513714	0.361952	1.94427	2	2	1. 0.72428;2. 59;3. 175;4. 90;5. 72;6. 214;7. 72;8. 214;9. 169;10. I;11. ATC	1. 0.77336;2. 61;3. 181;4. 92;5. 74;6. 220;7. 74;8. 220;9. 175;10. A;11. GCC
ERS451417_00094	1717.62.peg.92	NA	NA	NA	1	11	Cbelfantii_FRC0043,"Cdiphtheriae_NCTC11397","Ckutscheri_DSM20755","Cmustelae_DSM45274","Cpseudotuberculosis_31","Cpseudotuberculosis_ATCC19410","Crouxii_FRC0190","Csilvaticum_KL0182","Culcerans_NCTC12077","Culcerans_NCTC7910","Cvitaeruminis_DSM20294"	0.160424	0.135649	2.86857	0.160424	0.135649	2.86857	2050	2	1. 0.62112;2. 191;3. 571;4. 208;5. 206;6. 616;7. 206;8. 616;9. 475;10. V;11. GTC	1. 0.628;2. 195;3. 583;4. 212;5. 210;6. 628;7. 210;8. 628;9. 487;10. I;11. ATC
ERS451417_00859	1717.62.peg.864	NA	NA	NA	1	20	Cbelfantii_FRC0043,"Ccallunae_DSM20147","Cdeserti_GIMN1010","Cdiphtheriae_NCTC11397","Cdoosanense_DSM45436","Cefficiens_YS314","Cepidermidicanis_DSM45586","Chalotolerans_YIM70093","Chumireducens_DSM45392","Cimitans_DSM44264","Cmarinum_DSM44953","Cmaris_DSM45190","Cpseudotuberculosis_31","Cpseudotuberculosis_ATCC19410","Crouxii_FRC0190","Csilvaticum_KL0182","Ctestudinoris_DSM44614","Culcerans_NCTC…	0.344722	0.344722	1.49623	0.344722	0.344722	1.49623	2	1	1. 0.41647;2. 68;3. 202;4. 137;5. 82;6. 244;7. 91;8. 271;9. 172;10. M;11. ATG
ERS451417_00077	1717.62.peg.74	NA	NA	NA	1	35	Cargentoratense_DSM44202,"Caurimucosum_ATCC700975","Cbelfantii_FRC0043","Ccallunae_DSM20147","Cdeserti_GIMN1010","Cdiphtheriae_NCTC11397","Cdoosanense_DSM45436","Cefficiens_YS314","Cepidermidicanis_DSM45586","Cfalsenii_DSM44353","Cglutamicum_ATCC13032","Cglycinophilum_AJ3170","Chalotolerans_YIM70093","Chumireducens_DSM45392","Cimitans_DSM44264","Cjeikeium_K41","Ckroppenstedtii_DSM44385","Ckutsche…	0.13267	0.116408	1.92013	0.121519	0.121519	1.94987	258	0
ERS451417_00699	1717.62.peg.703	NA	NA	NA	1	25	Catypicum_R2070,"Caurimucosum_ATCC700975","Cbelfantii_FRC0043","Ccallunae_DSM20147","Ccamporealensis_DSM44610","Cdeserti_GIMN1010","Cdiphtheriae_NCTC11397","Cefficiens_YS314","Cepidermidicanis_DSM45586","Cglutamicum_ATCC13032","Cglycinophilum_AJ3170","Chalotolerans_YIM70093","Chumireducens_DSM45392","Cmarinum_DSM44953","Cmustelae_DSM45274","Cpseudotuberculosis_31","Cpseudotuberculosis_ATCC19410",…	0.127084	0.127084	1.67277	0.127094	0.127094	1.67277	258	0
ERS451417_00006	1717.62.peg.7	NA	NA	NA	1	16	Cbelfantii_FRC0043,"Ccamporealensis_DSM44610","Cdiphtheriae_NCTC11397","Chalotolerans_YIM70093","Chumireducens_DSM45392","Ckutscheri_DSM20755","Cmaris_DSM45190","Cpseudotuberculosis_31","Cpseudotuberculosis_ATCC19410","Crouxii_FRC0190","Csilvaticum_KL0182","Csimulans_PES1","Ctestudinoris_DSM44614","Culcerans_NCTC12077","Culcerans_NCTC7910","Cvitaeruminis_DSM20294"	0.149143	0.149143	1.92334	0.149143	0.149143	1.92334	258	0
ERS451417_01223	1717.62.peg.1231	NA	NA	NA	1	5	Ccallunae_DSM20147,"Cdiphtheriae_NCTC11397","Chalotolerans_YIM70093","Cpseudotuberculosis_ATCC19410","Crouxii_FRC0190"	0.536821	0.39033	1.49564	0.536821	0.39033	1.49564	2	2	1. 0.65036;2. 14;3. 40;4. 15;5. 15;6. 43;7. 15;8. 43;9. 40;10. I;11. ATC	1. 0.52205;2. 37;3. 109;4. 38;5. 38;6. 112;7. 38;8. 112;9. 109;10. V;11. GTA
ERS451417_00868	1717.62.peg.873	NA	NA	NA	1	8	Cbelfantii_FRC0043,"Cdiphtheriae_NCTC11397","Cpseudotuberculosis_31","Cpseudotuberculosis_ATCC19410","Crouxii_FRC0190","Csilvaticum_KL0182","Culcerans_NCTC12077","Culcerans_NCTC7910"	0.121436	0.121436	2.99994	0.121436	0.121436	2.99993	2	2	1. 0.62314;2. 42;3. 124;4. 62;5. 42;6. 124;7. 42;8. 124;9. 4;10. S;11. AGT	1. 0.4222;2. 181;3. 541;4. 231;5. 181;6. 541;7. 181;8. 541;9. 421;10. I;11. ATA
ERS451417_01212	1717.62.peg.1220	NA	NA	NA	1	39	Cargentoratense_DSM44202,"Catypicum_R2070","Caurimucosum_ATCC700975","Cbelfantii_FRC0043","Ccallunae_DSM20147","Ccamporealensis_DSM44610","Cdeserti_GIMN1010","Cdiphtheriae_NCTC11397","Cdoosanense_DSM45436","Cefficiens_YS314","Cepidermidicanis_DSM45586","Cfalsenii_DSM44353","Cglutamicum_ATCC13032","Cglycinophilum_AJ3170","Chalotolerans_YIM70093","Chumireducens_DSM45392","Cimitans_DSM44264","Cjeike…	0.141219	0.141219	1.91416	0.141219	0.141219	1.91416	2	1	1. 0.55288;2. 67;3. 199;4. 83;5. 83;6. 247;7. 153;8. 457;9. 178;10. A;11. GCT
ERS451417_01161	1717.62.peg.1172	NA	NA	NA	1	37	Cargentoratense_DSM44202,"Caurimucosum_ATCC700975","Cbelfantii_FRC0043","Ccallunae_DSM20147","Ccamporealensis_DSM44610","Cdeserti_GIMN1010","Cdiphtheriae_NCTC11397","Cdoosanense_DSM45436","Cefficiens_YS314","Cepidermidicanis_DSM45586","Cfalsenii_DSM44353","Cglutamicum_ATCC13032","Cglycinophilum_AJ3170","Chalotolerans_YIM70093","Chumireducens_DSM45392","Cimitans_DSM44264","Cjeikeium_K41","Ckroppen…	0.228929	0.221367	1.37826	0.228929	0.221367	1.37826	1026	2	1. 0.61819;2. 122;3. 364;4. 161;5. 161;6. 481;7. 240;8. 718;9. 271;10. T;11. ACC	1. 0.66572;2. 316;3. 946;4. 373;5. 373;6. 1117;7. 476;8. 1426;9. 784;10. A;11. GCT
ERS451417_00588	1717.62.peg.592	NA	NA	NA	1	31	Cargentoratense_DSM44202,"Catypicum_R2070","Caurimucosum_ATCC700975","Cbelfantii_FRC0043","Ccallunae_DSM20147","Ccamporealensis_DSM44610","Cdeserti_GIMN1010","Cdiphtheriae_NCTC11397","Cdoosanense_DSM45436","Cefficiens_YS314","Cglutamicum_ATCC13032","Chalotolerans_YIM70093","Chumireducens_DSM45392","Cimitans_DSM44264","Ckutscheri_DSM20755","Cmarinum_DSM44953","Cmaris_DSM45190","Cmustelae_DSM45274"…	0.30493	0.30493	1.63682	0.30493	0.30493	1.63682	1026	1	1. 0.44425;2. 29;3. 85;4. 81;5. 59;6. 175;7. 111;8. 331;9. 67;10. L;11. CTC
ERS451417_00996	1717.62.peg.1007	NA	NA	NA	1	13	Cargentoratense_DSM44202,"Cbelfantii_FRC0043","Cdiphtheriae_NCTC11397","Cepidermidicanis_DSM45586","Ckroppenstedtii_DSM44385","Ckutscheri_DSM20755","Clactis_RW25","Cmustelae_DSM45274","Cpseudotuberculosis_31","Cpseudotuberculosis_ATCC19410","Crouxii_FRC0190","Culcerans_NCTC12077","Culcerans_NCTC7910"	0.156882	0.156882	2.39155	0.156882	0.156882	2.39155	3074	3	1. 0.40362;2. 145;3. 433;4. 174;5. 173;6. 517;7. 232;8. 694;9. 259;10. S;11. TCC	1. 0.45648;2. 187;3. 559;4. 229;5. 227;6. 679;7. 287;8. 859;9. 367;10. D;11. GAC	1. 0.40589;2. 339;3. 1015;4. 395;5. 389;6. 1165;7. 449;8. 1345;9. 778;10. P;11. CCT
ERS451417_00643	1717.62.peg.647	NA	NA	NA	1	19	Cargentoratense_DSM44202,"Caurimucosum_ATCC700975","Cbelfantii_FRC0043","Cdiphtheriae_NCTC11397","Cepidermidicanis_DSM45586","Chalotolerans_YIM70093","Chumireducens_DSM45392","Ckutscheri_DSM20755","Cmustelae_DSM45274","Cpseudotuberculosis_31","Cpseudotuberculosis_ATCC19410","Crouxii_FRC0190","Csilvaticum_KL0182","Csimulans_PES1","Csingulare_IBSB52218","Ctestudinoris_DSM44614","Culcerans_NCTC12077…	0.0760268	0.0760268	1.51676	0.0760268	0.0760268	1.51676	258	0
ERS451417_00247	1717.62.peg.242	NA	NA	NA	1	8	Caurimucosum_ATCC700975,"Cbelfantii_FRC0043","Cdiphtheriae_NCTC11397","Cdoosanense_DSM45436","Crouxii_FRC0190","Culcerans_NCTC12077","Culcerans_NCTC7910","Cuterequi_DSM45634"	0.458388	0.440519	2.64747	0.440519	0.440519	2.64746	258	0
ERS451417_00195	1717.62.peg.192	NA	NA	NA	1	32	Cargentoratense_DSM44202,"Catypicum_R2070","Caurimucosum_ATCC700975","Cbelfantii_FRC0043","Ccallunae_DSM20147","Ccamporealensis_DSM44610","Cdeserti_GIMN1010","Cdiphtheriae_NCTC11397","Cefficiens_YS314","Cepidermidicanis_DSM45586","Cfalsenii_DSM44353","Cglutamicum_ATCC13032","Cglycinophilum_AJ3170","Chumireducens_DSM45392","Cjeikeium_K41","Ckutscheri_DSM20755","Clactis_RW25","Cmarinum_DSM44953","C…	0.28866	0.28866	1.73188	0.28866	0.28866	1.73188	3074	1	1. 0.57104;2. 134;3. 400;4. 163;5. 163;6. 487;7. 182;8. 544;9. 304;10. D;11. GAC
ERS451417_00310	1717.62.peg.311	NA	NA	NA	1	39	Cargentoratense_DSM44202,"Catypicum_R2070","Caurimucosum_ATCC700975","Cbelfantii_FRC0043","Ccallunae_DSM20147","Ccamporealensis_DSM44610","Cdeserti_GIMN1010","Cdiphtheriae_NCTC11397","Cdoosanense_DSM45436","Cefficiens_YS314","Cepidermidicanis_DSM45586","Cfalsenii_DSM44353","Cglutamicum_ATCC13032","Cglycinophilum_AJ3170","Chalotolerans_YIM70093","Chumireducens_DSM45392","Cimitans_DSM44264","Cjeike…	0.167804	0.167804	1.95441	0.167804	0.167804	1.95441	1282	0
ERS451417_01022	1717.62.peg.1035	NA	NA	NA	1	39	Cargentoratense_DSM44202,"Catypicum_R2070","Caurimucosum_ATCC700975","Cbelfantii_FRC0043","Ccallunae_DSM20147","Ccamporealensis_DSM44610","Cdeserti_GIMN1010","Cdiphtheriae_NCTC11397","Cdoosanense_DSM45436","Cefficiens_YS314","Cepidermidicanis_DSM45586","Cfalsenii_DSM44353","Cglutamicum_ATCC13032","Cglycinophilum_AJ3170","Chalotolerans_YIM70093","Chumireducens_DSM45392","Cimitans_DSM44264","Cjeike…	0.0863729	0.0863729	1.82305	0.0863729	0.0863729	1.82305	2306	0
ERS451417_00326	1717.62.peg.328	NA	NA	NA	1	39	Cargentoratense_DSM44202,"Catypicum_R2070","Caurimucosum_ATCC700975","Cbelfantii_FRC0043","Ccallunae_DSM20147","Ccamporealensis_DSM44610","Cdeserti_GIMN1010","Cdiphtheriae_NCTC11397","Cdoosanense_DSM45436","Cefficiens_YS314","Cepidermidicanis_DSM45586","Cfalsenii_DSM44353","Cglutamicum_ATCC13032","Cglycinophilum_AJ3170","Chalotolerans_YIM70093","Chumireducens_DSM45392","Cimitans_DSM44264","Cjeike…	0.207113	0.207113	1.67465	0.207113	0.207113	1.67464	1282	0
ERS451417_00291	1717.62.peg.292	NA	NA	NA	1	39	Cargentoratense_DSM44202,"Catypicum_R2070","Caurimucosum_ATCC700975","Cbelfantii_FRC0043","Ccallunae_DSM20147","Ccamporealensis_DSM44610","Cdeserti_GIMN1010","Cdiphtheriae_NCTC11397","Cdoosanense_DSM45436","Cefficiens_YS314","Cepidermidicanis_DSM45586","Cfalsenii_DSM44353","Cglutamicum_ATCC13032","Cglycinophilum_AJ3170","Chalotolerans_YIM70093","Chumireducens_DSM45392","Cimitans_DSM44264","Cjeike…	0.0989458	0.0989458	1.76154	0.0989458	0.0989458	1.76154	258	0
ERS451417_01263	1717.62.peg.1271	NA	NA	NA	1	3	Cbelfantii_FRC0043,"Cdiphtheriae_NCTC11397","Crouxii_FRC0190"	0.210241	0.210241	5.82639	0.210241	0.210241	5.82639	130	3	1. 0.64591;2. 61;3. 181;4. 90;5. 61;6. 181;7. 61;8. 181;9. 160;10. A;11. GCC	1. 0.61726;2. 183;3. 547;4. 257;5. 183;6. 547;7. 183;8. 547;9. 526;10. V;11. GTG	1. 0.54277;2. 287;3. 859;4. 372;5. 287;6. 859;7. 287;8. 859;9. 838;10. L;11. CTA
ERS451417_00942	1717.62.peg.949	NA	NA	NA	1	30	Cargentoratense_DSM44202,"Catypicum_R2070","Caurimucosum_ATCC700975","Cbelfantii_FRC0043","Ccamporealensis_DSM44610","Cdiphtheriae_NCTC11397","Cdoosanense_DSM45436","Cepidermidicanis_DSM45586","Cglycinophilum_AJ3170","Chalotolerans_YIM70093","Chumireducens_DSM45392","Cimitans_DSM44264","Ckroppenstedtii_DSM44385","Ckutscheri_DSM20755","Clactis_RW25","Cmarinum_DSM44953","Cmustelae_DSM45274","Cpseud…	0.122431	0.122431	1.76125	0.122431	0.122431	1.76125	258	0
ERS451417_00080	1717.62.peg.77	NA	NA	NA	1	16	Cargentoratense_DSM44202,"Caurimucosum_ATCC700975","Cbelfantii_FRC0043","Cdiphtheriae_NCTC11397","Cepidermidicanis_DSM45586","Cfalsenii_DSM44353","Cimitans_DSM44264","Cjeikeium_K41","Ckroppenstedtii_DSM44385","Clactis_RW25","Cmustelae_DSM45274","CriegeliiPUDD83A45","Crouxii_FRC0190","Csimulans_PES1","Csingulare_IBSB52218","Cureicelerivorans_IMMIBRIV2301"	0.159224	0.159224	1.84364	0.159224	0.159224	1.84364	2	1	1. 0.57628;2. 62;3. 184;4. 94;5. 94;6. 280;7. 213;8. 637;9. 79;10. T;11. ACT
ERS451417_00799	1717.62.peg.805	NA	NA	NA	1	7	Cbelfantii_FRC0043,"Cdiphtheriae_NCTC11397","Cpseudotuberculosis_31","Cpseudotuberculosis_ATCC19410","Crouxii_FRC0190","Culcerans_NCTC12077","Culcerans_NCTC7910"	0.999703	0.0913189	2.21481	0.0934338	0.0913189	2.21481	256	0
ERS451417_00815	1717.62.peg.821	NA	NA	NA	1	31	Catypicum_R2070,"Caurimucosum_ATCC700975","Cbelfantii_FRC0043","Ccallunae_DSM20147","Ccamporealensis_DSM44610","Cdeserti_GIMN1010","Cdiphtheriae_NCTC11397","Cefficiens_YS314","Cepidermidicanis_DSM45586","Cfalsenii_DSM44353","Cglutamicum_ATCC13032","Cglycinophilum_AJ3170","Chalotolerans_YIM70093","Chumireducens_DSM45392","Cimitans_DSM44264","Cjeikeium_K41","Cmarinum_DSM44953","Cmustelae_DSM45274",…	0.129117	0.129117	1.92415	0.129117	0.129117	1.92415	3074	2	1. 0.44831;2. 176;3. 526;4. 196;5. 196;6. 586;7. 327;8. 979;9. 331;10. V;11. GTC	1. 0.51822;2. 428;3. 1282;4. 456;5. 456;6. 1366;7. 602;8. 1804;9. 970;10. R;11. CGC
ERS451417_01056	1717.62.peg.1067	NA	NA	NA	1	38	Cargentoratense_DSM44202,"Catypicum_R2070","Caurimucosum_ATCC700975","Cbelfantii_FRC0043","Ccallunae_DSM20147","Ccamporealensis_DSM44610","Cdeserti_GIMN1010","Cdiphtheriae_NCTC11397","Cdoosanense_DSM45436","Cefficiens_YS314","Cepidermidicanis_DSM45586","Cfalsenii_DSM44353","Cglutamicum_ATCC13032","Cglycinophilum_AJ3170","Chalotolerans_YIM70093","Chumireducens_DSM45392","Cimitans_DSM44264","Cjeike…	0.121326	0.121326	1.79194	0.121326	0.121326	1.79194	1026	1	1. 0.6341;2. 75;3. 223;4. 95;5. 95;6. 283;7. 176;8. 526;9. 187;10. V;11. GTT
ERS451417_00754	1717.62.peg.759	NA	NA	NA	1	39	Cargentoratense_DSM44202,"Catypicum_R2070","Caurimucosum_ATCC700975","Cbelfantii_FRC0043","Ccallunae_DSM20147","Ccamporealensis_DSM44610","Cdeserti_GIMN1010","Cdiphtheriae_NCTC11397","Cdoosanense_DSM45436","Cefficiens_YS314","Cepidermidicanis_DSM45586","Cfalsenii_DSM44353","Cglutamicum_ATCC13032","Cglycinophilum_AJ3170","Chalotolerans_YIM70093","Chumireducens_DSM45392","Cimitans_DSM44264","Cjeike…	0.589373	0.131443	2.08624	0.271394	0.131443	2.08626	258	0
ERS451417_00803	1717.62.peg.810	NA	NA	NA	1	39	Cargentoratense_DSM44202,"Catypicum_R2070","Caurimucosum_ATCC700975","Cbelfantii_FRC0043","Ccallunae_DSM20147","Ccamporealensis_DSM44610","Cdeserti_GIMN1010","Cdiphtheriae_NCTC11397","Cdoosanense_DSM45436","Cefficiens_YS314","Cepidermidicanis_DSM45586","Cfalsenii_DSM44353","Cglutamicum_ATCC13032","Cglycinophilum_AJ3170","Chalotolerans_YIM70093","Chumireducens_DSM45392","Cimitans_DSM44264","Cjeike…	0.310279	0.0773848	2.10004	0.0776435	0.0776435	2.08108	258	0
ERS451417_00846	1717.62.peg.851	NA	NA	NA	1	39	Cargentoratense_DSM44202,"Catypicum_R2070","Caurimucosum_ATCC700975","Cbelfantii_FRC0043","Ccallunae_DSM20147","Ccamporealensis_DSM44610","Cdeserti_GIMN1010","Cdiphtheriae_NCTC11397","Cdoosanense_DSM45436","Cefficiens_YS314","Cepidermidicanis_DSM45586","Cfalsenii_DSM44353","Cglutamicum_ATCC13032","Cglycinophilum_AJ3170","Chalotolerans_YIM70093","Chumireducens_DSM45392","Cimitans_DSM44264","Cjeike…	0.189714	0.189714	1.77795	0.189714	0.189714	1.77796	2	1	1. 0.4117;2. 202;3. 604;4. 216;5. 216;6. 646;7. 270;8. 808;9. 517;10. V;11. GTG
ERS451417_00252	1717.62.peg.247	NA	NA	NA	1	10	Cargentoratense_DSM44202,"Cbelfantii_FRC0043","Cdiphtheriae_NCTC11397","Ckutscheri_DSM20755","Cmustelae_DSM45274","Cpseudotuberculosis_ATCC19410","Crouxii_FRC0190","Csilvaticum_KL0182","Culcerans_NCTC12077","Culcerans_NCTC7910"	0.10155	0.0903263	2.28926	0.10155	0.0903263	2.28926	3074	3	1. 0.51602;2. 145;3. 433;4. 186;5. 159;6. 475;7. 176;8. 526;9. 385;10. A;11. GCA	1. 0.45451;2. 239;3. 715;4. 281;5. 254;6. 760;7. 282;8. 844;9. 583;10. S;11. TCA	1. 0.59492;2. 271;3. 811;4. 313;5. 286;6. 856;7. 314;8. 940;9. 679;10. R;11. CGG
ERS451417_00393	1717.62.peg.393	NA	NA	NA	1	39	Cargentoratense_DSM44202,"Catypicum_R2070","Caurimucosum_ATCC700975","Cbelfantii_FRC0043","Ccallunae_DSM20147","Ccamporealensis_DSM44610","Cdeserti_GIMN1010","Cdiphtheriae_NCTC11397","Cdoosanense_DSM45436","Cefficiens_YS314","Cepidermidicanis_DSM45586","Cfalsenii_DSM44353","Cglutamicum_ATCC13032","Cglycinophilum_AJ3170","Chalotolerans_YIM70093","Chumireducens_DSM45392","Cimitans_DSM44264","Cjeike…	0.486621	0.145821	1.81739	0.326262	0.145812	1.81737	258	0
ERS451417_00447	1717.62.peg.450	NA	NA	NA	1	17	Cbelfantii_FRC0043,"Ccallunae_DSM20147","Ccamporealensis_DSM44610","Cdeserti_GIMN1010","Cdiphtheriae_NCTC11397","Cepidermidicanis_DSM45586","Cglutamicum_ATCC13032","Ckutscheri_DSM20755","Cmustelae_DSM45274","Cpseudotuberculosis_31","Cpseudotuberculosis_ATCC19410","Crouxii_FRC0190","Csilvaticum_KL0182","Ctestudinoris_DSM44614","Culcerans_NCTC12077","Culcerans_NCTC7910","Cuterequi_DSM45634"	0.104145	0.104135	2.18487	0.104145	0.104135	2.18488	258	0
ERS451417_00298	1717.62.peg.299	NA	NA	NA	1	38	Cargentoratense_DSM44202,"Catypicum_R2070","Caurimucosum_ATCC700975","Cbelfantii_FRC0043","Ccallunae_DSM20147","Ccamporealensis_DSM44610","Cdeserti_GIMN1010","Cdiphtheriae_NCTC11397","Cdoosanense_DSM45436","Cefficiens_YS314","Cepidermidicanis_DSM45586","Cfalsenii_DSM44353","Cglutamicum_ATCC13032","Cglycinophilum_AJ3170","Chalotolerans_YIM70093","Chumireducens_DSM45392","Cimitans_DSM44264","Cjeike…	0.200553	0.200553	1.73465	0.200553	0.200553	1.73465	1026	2	1. 0.53106;2. 155;3. 463;4. 210;5. 209;6. 625;7. 430;8. 1288;9. 289;10. D;11. GAT	1. 0.51602;2. 244;3. 730;4. 299;5. 298;6. 892;7. 519;8. 1555;9. 556;10. V;11. GTG
ERS451417_00983	1717.62.peg.994	NA	NA	NA	1	39	Cargentoratense_DSM44202,"Catypicum_R2070","Caurimucosum_ATCC700975","Cbelfantii_FRC0043","Ccallunae_DSM20147","Ccamporealensis_DSM44610","Cdeserti_GIMN1010","Cdiphtheriae_NCTC11397","Cdoosanense_DSM45436","Cefficiens_YS314","Cepidermidicanis_DSM45586","Cfalsenii_DSM44353","Cglutamicum_ATCC13032","Cglycinophilum_AJ3170","Chalotolerans_YIM70093","Chumireducens_DSM45392","Cimitans_DSM44264","Cjeike…	0.156352	0.156352	1.84752	0.156352	0.156352	1.84752	3074	2	1. 0.44133;2. 235;3. 703;4. 250;5. 250;6. 748;7. 250;8. 748;9. 628;10. A;11. GCC	1. 0.47432;2. 276;3. 826;4. 291;5. 291;6. 871;7. 291;8. 871;9. 751;10. E;11. GAG
ERS451417_00848	1717.62.peg.853	NA	NA	NA	1	6	Cbelfantii_FRC0043,"Cdiphtheriae_NCTC11397","Cpseudotuberculosis_ATCC19410","Crouxii_FRC0190","Csilvaticum_KL0182","Culcerans_NCTC7910"	0.05855	0.05855	2.13026	0.0850182	0.0841455	2.19541	2306	0
ERS451417_00099	1717.62.peg.97	NA	NA	NA	1	28	Cargentoratense_DSM44202,"Caurimucosum_ATCC700975","Cbelfantii_FRC0043","Ccallunae_DSM20147","Ccamporealensis_DSM44610","Cdeserti_GIMN1010","Cdiphtheriae_NCTC11397","Cdoosanense_DSM45436","Cefficiens_YS314","Cepidermidicanis_DSM45586","Cglutamicum_ATCC13032","Chalotolerans_YIM70093","Chumireducens_DSM45392","Cimitans_DSM44264","Cmarinum_DSM44953","Cmaris_DSM45190","Cpseudotuberculosis_31","Cpseud…	0.172147	0.172147	1.63296	0.172147	0.172147	1.63296	3074	2	1. 0.48103;2. 201;3. 601;4. 246;5. 232;6. 694;7. 319;8. 955;9. 427;10. L;11. CTT	1. 0.42496;2. 219;3. 655;4. 264;5. 250;6. 748;7. 337;8. 1009;9. 481;10. I;11. ATT
ERS451417_00968	1717.62.peg.976	NA	NA	NA	1	16	Cbelfantii_FRC0043,"Ccallunae_DSM20147","Cdeserti_GIMN1010","Cdiphtheriae_NCTC11397","Cepidermidicanis_DSM45586","Cglutamicum_ATCC13032","Cglycinophilum_AJ3170","Ckutscheri_DSM20755","Clactis_RW25","Cpseudotuberculosis_31","Cpseudotuberculosis_ATCC19410","Crouxii_FRC0190","Csilvaticum_KL0182","Ctestudinoris_DSM44614","Culcerans_NCTC12077","Culcerans_NCTC7910"	0.276513	0.105549	2.37788	0.276513	0.105549	2.37789	3074	3	1. 0.65677;2. 25;3. 73;4. 43;5. 43;6. 127;7. 86;8. 256;9. 34;10. D;11. GAT	1. 0.65962;2. 28;3. 82;4. 46;5. 46;6. 136;7. 89;8. 265;9. 43;10. V;11. GTC	1. 0.72004;2. 142;3. 424;4. 160;5. 160;6. 478;7. 203;8. 607;9. 385;10. T;11. ACT
ERS451417_00302	1717.62.peg.303	NA	NA	NA	1	22	Catypicum_R2070,"Caurimucosum_ATCC700975","Cbelfantii_FRC0043","Ccamporealensis_DSM44610","Cdiphtheriae_NCTC11397","Cepidermidicanis_DSM45586","Chumireducens_DSM45392","Cimitans_DSM44264","Cmarinum_DSM44953","Cmustelae_DSM45274","Cpseudotuberculosis_31","Cpseudotuberculosis_ATCC19410","CriegeliiPUDD83A45","Crouxii_FRC0190","Csilvaticum_KL0182","Csimulans_PES1","Csingulare_IBSB52218","Ctestudinori…	0.105787	0.105787	2.07503	0.105787	0.105787	2.07503	258	0
ERS451417_00680	1717.62.peg.687	NA	NA	NA	1	39	Cargentoratense_DSM44202,"Catypicum_R2070","Caurimucosum_ATCC700975","Cbelfantii_FRC0043","Ccallunae_DSM20147","Ccamporealensis_DSM44610","Cdeserti_GIMN1010","Cdiphtheriae_NCTC11397","Cdoosanense_DSM45436","Cefficiens_YS314","Cepidermidicanis_DSM45586","Cfalsenii_DSM44353","Cglutamicum_ATCC13032","Cglycinophilum_AJ3170","Chalotolerans_YIM70093","Chumireducens_DSM45392","Cimitans_DSM44264","Cjeike…	0.468626	0.0589179	1.64837	0.0596073	0.0596073	1.62964	2306	0
ERS451417_01233	1717.62.peg.1241	NA	NA	NA	1	14	Cargentoratense_DSM44202,"Cbelfantii_FRC0043","Cdiphtheriae_NCTC11397","Cepidermidicanis_DSM45586","Ckutscheri_DSM20755","Clactis_RW25","Cmustelae_DSM45274","Cpseudotuberculosis_31","Cpseudotuberculosis_ATCC19410","Crouxii_FRC0190","Csilvaticum_KL0182","Culcerans_NCTC12077","Culcerans_NCTC7910","Cvitaeruminis_DSM20294"	0.227287	0.152341	2.84755	0.227287	0.152351	2.84755	2	3	1. 0.73434;2. 10;3. 28;4. 33;5. 33;6. 97;7. 70;8. 208;9. 4;10. I;11. ATC	1. 0.74759;2. 291;3. 871;4. 340;5. 340;6. 1018;7. 442;8. 1324;9. 673;10. N;11. AAT	1. 0.54828;2. 465;3. 1393;4. 514;5. 514;6. 1540;7. 616;8. 1846;9. 1195;10. D;11. GAT
ERS451417_01048	1717.62.peg.1058	NA	NA	NA	1	39	Cargentoratense_DSM44202,"Catypicum_R2070","Caurimucosum_ATCC700975","Cbelfantii_FRC0043","Ccallunae_DSM20147","Ccamporealensis_DSM44610","Cdeserti_GIMN1010","Cdiphtheriae_NCTC11397","Cdoosanense_DSM45436","Cefficiens_YS314","Cepidermidicanis_DSM45586","Cfalsenii_DSM44353","Cglutamicum_ATCC13032","Cglycinophilum_AJ3170","Chalotolerans_YIM70093","Chumireducens_DSM45392","Cimitans_DSM44264","Cjeike…	0.214985	0.214985	1.54556	0.214985	0.214985	1.54556	3330	0
ERS451417_00138	1717.62.peg.137	NA	NA	NA	1	8	Cbelfantii_FRC0043,"Cdiphtheriae_NCTC11397","Cmustelae_DSM45274","Cpseudotuberculosis_31","Crouxii_FRC0190","Csilvaticum_KL0182","Csingulare_IBSB52218","Culcerans_NCTC7910"	0.0814127	0.0814127	2.73266	0.0814127	0.0814127	2.73266	2	1	1. 0.98806;2. 82;3. 244;4. 82;5. 82;6. 244;7. 82;8. 244;9. 244;10. K;11. AAG
ERS451417_00574	1717.62.peg.577	NA	NA	NA	1	3	Cbelfantii_FRC0043,"Cdiphtheriae_NCTC11397","Crouxii_FRC0190"	0.151	0.151	3.40724	0.151	0.151	3.40724	386	0
ERS451417_00389	1717.62.peg.389	NA	NA	NA	1	6	Cbelfantii_FRC0043,"Cdiphtheriae_NCTC11397","Cpseudotuberculosis_31","Cpseudotuberculosis_ATCC19410","Crouxii_FRC0190","Culcerans_NCTC12077"	0.117006	0.117006	4.2385	0.117006	0.117006	4.23844	2	2	1. 0.42794;2. 52;3. 154;4. 85;5. 52;6. 154;7. 52;8. 154;9. 154;10. T;11. ACA	1. 0.80441;2. 97;3. 289;4. 139;5. 106;6. 316;7. 107;8. 319;9. 274;10. V;11. GTG
ERS451417_00570	1717.62.peg.573	NA	NA	NA	1	7	Cbelfantii_FRC0043,"Cdiphtheriae_NCTC11397","Cpseudotuberculosis_31","Cpseudotuberculosis_ATCC19410","Crouxii_FRC0190","Csilvaticum_KL0182","Culcerans_NCTC7910"	0.237443	0.237443	2.59377	0.263416	0.239492	2.6214	2	5	1. 0.63211;2. 76;3. 226;4. 170;5. 76;6. 226;7. 76;8. 226;9. 226;10. I;11. ATT	1. 0.40353;2. 118;3. 352;4. 258;5. 118;6. 352;7. 118;8. 352;9. 352;10. F;11. TTC	1. 0.50335;2. 157;3. 469;4. 310;5. 157;6. 469;7. 157;8. 469;9. 469;10. A;11. GCG	1. 0.47785;2. 250;3. 748;4. 411;5. 250;6. 748;7. 250;8. 748;9. 748;10. F;11. TTC	1. 0.47523;2. 304;3. 910;4. 493;5. 305;6. 913;7. 320;8. 958;9. 763;10. E;11. GAG
ERS451417_01166	1717.62.peg.1177	NA	NA	NA	1	39	Cargentoratense_DSM44202,"Catypicum_R2070","Caurimucosum_ATCC700975","Cbelfantii_FRC0043","Ccallunae_DSM20147","Ccamporealensis_DSM44610","Cdeserti_GIMN1010","Cdiphtheriae_NCTC11397","Cdoosanense_DSM45436","Cefficiens_YS314","Cepidermidicanis_DSM45586","Cfalsenii_DSM44353","Cglutamicum_ATCC13032","Cglycinophilum_AJ3170","Chalotolerans_YIM70093","Chumireducens_DSM45392","Cimitans_DSM44264","Cjeike…	0.104388	0.104388	1.84297	0.104388	0.104388	1.84296	258	0
ERS451417_01255	1717.62.peg.1263	NA	NA	NA	1	29	Cargentoratense_DSM44202,"Catypicum_R2070","Caurimucosum_ATCC700975","Cbelfantii_FRC0043","Ccamporealensis_DSM44610","Cdiphtheriae_NCTC11397","Cdoosanense_DSM45436","Cepidermidicanis_DSM45586","Chumireducens_DSM45392","Cimitans_DSM44264","Ckroppenstedtii_DSM44385","Ckutscheri_DSM20755","Clactis_RW25","Cmarinum_DSM44953","Cmaris_DSM45190","Cmustelae_DSM45274","Cpseudotuberculosis_31","Cpseudotuber…	0.191377	0.191377	1.82543	0.191377	0.191377	1.82543	258	0
ERS451417_00994	1717.62.peg.1005	NA	NA	NA	1	17	Cargentoratense_DSM44202,"Catypicum_R2070","Cbelfantii_FRC0043","Ccallunae_DSM20147","Cdeserti_GIMN1010","Cdiphtheriae_NCTC11397","Cefficiens_YS314","Cglutamicum_ATCC13032","Cglycinophilum_AJ3170","Ckutscheri_DSM20755","Cmustelae_DSM45274","Cpseudotuberculosis_31","Cpseudotuberculosis_ATCC19410","Crouxii_FRC0190","Csilvaticum_KL0182","Cterpenotabidum_Y11","Culcerans_NCTC7910"	0.0970702	0.0970702	2.09324	0.0970702	0.0970702	2.09324	258	0
ERS451417_00963	1717.62.peg.970	NA	NA	NA	1	39	Cargentoratense_DSM44202,"Catypicum_R2070","Caurimucosum_ATCC700975","Cbelfantii_FRC0043","Ccallunae_DSM20147","Ccamporealensis_DSM44610","Cdeserti_GIMN1010","Cdiphtheriae_NCTC11397","Cdoosanense_DSM45436","Cefficiens_YS314","Cepidermidicanis_DSM45586","Cfalsenii_DSM44353","Cglutamicum_ATCC13032","Cglycinophilum_AJ3170","Chalotolerans_YIM70093","Chumireducens_DSM45392","Cimitans_DSM44264","Cjeike…	0.225287	0.225287	2.13972	0.225287	0.225287	2.1397	2306	0
ERS451417_01154	1717.62.peg.1165	NA	NA	NA	1	39	Cargentoratense_DSM44202,"Catypicum_R2070","Caurimucosum_ATCC700975","Cbelfantii_FRC0043","Ccallunae_DSM20147","Ccamporealensis_DSM44610","Cdeserti_GIMN1010","Cdiphtheriae_NCTC11397","Cdoosanense_DSM45436","Cefficiens_YS314","Cepidermidicanis_DSM45586","Cfalsenii_DSM44353","Cglutamicum_ATCC13032","Cglycinophilum_AJ3170","Chalotolerans_YIM70093","Chumireducens_DSM45392","Cimitans_DSM44264","Cjeike…	0.496525	0.13303	2.19008	0.25697	0.13304	2.19008	258	0
ERS451417_00752	1717.62.peg.757	NA	NA	NA	1	9	Cdeserti_GIMN1010,"Cdiphtheriae_NCTC11397","Ckutscheri_DSM20755","Cpseudotuberculosis_ATCC19410","Crouxii_FRC0190","Csilvaticum_KL0182","Culcerans_NCTC12077","Culcerans_NCTC7910","Cvitaeruminis_DSM20294"	5.43545	0.11273	2.2863	0.992223	0.11274	2.2863	256	0
ERS451417_00455	1717.62.peg.459	NA	NA	NA	1	30	Caurimucosum_ATCC700975,"Cbelfantii_FRC0043","Ccallunae_DSM20147","Ccamporealensis_DSM44610","Cdeserti_GIMN1010","Cdiphtheriae_NCTC11397","Cefficiens_YS314","Cepidermidicanis_DSM45586","Cglutamicum_ATCC13032","Cglycinophilum_AJ3170","Chalotolerans_YIM70093","Chumireducens_DSM45392","Ckroppenstedtii_DSM44385","Ckutscheri_DSM20755","Cmarinum_DSM44953","Cmaris_DSM45190","Cmustelae_DSM45274","Cpseudo…	0.229024	0.229024	1.9248	0.229024	0.229024	1.9248	3074	2	1. 0.62168;2. 126;3. 376;4. 134;5. 134;6. 400;7. 142;8. 424;9. 208;10. I;11. ATT	1. 0.42233;2. 237;3. 709;4. 245;5. 245;6. 733;7. 254;8. 760;9. 520;10. A;11. GCA
ERS451417_00401	1717.62.peg.401	NA	NA	NA	1	38	Cargentoratense_DSM44202,"Catypicum_R2070","Caurimucosum_ATCC700975","Cbelfantii_FRC0043","Ccallunae_DSM20147","Ccamporealensis_DSM44610","Cdeserti_GIMN1010","Cdiphtheriae_NCTC11397","Cdoosanense_DSM45436","Cefficiens_YS314","Cepidermidicanis_DSM45586","Cfalsenii_DSM44353","Cglutamicum_ATCC13032","Cglycinophilum_AJ3170","Chalotolerans_YIM70093","Chumireducens_DSM45392","Cimitans_DSM44264","Cjeike…	0.454982	0.109608	1.91682	0.212776	0.109608	1.91682	2306	0
ERS451417_00446	1717.62.peg.449	NA	NA	NA	1	19	Caurimucosum_ATCC700975,"Cbelfantii_FRC0043","Ccallunae_DSM20147","Ccamporealensis_DSM44610","Cdeserti_GIMN1010","Cdiphtheriae_NCTC11397","Cepidermidicanis_DSM45586","Cglutamicum_ATCC13032","Ckroppenstedtii_DSM44385","Ckutscheri_DSM20755","Cmustelae_DSM45274","Cpseudotuberculosis_31","Cpseudotuberculosis_ATCC19410","Crouxii_FRC0190","Csilvaticum_KL0182","Ctestudinoris_DSM44614","Culcerans_NCTC120…	0.237266	0.237266	2.05422	0.237266	0.237266	2.05422	2050	1	1. 0.6705;2. 128;3. 382;4. 132;5. 132;6. 394;7. 132;8. 394;9. 352;10. A;11. GCA
ERS451417_00812	1717.62.peg.818	NA	NA	NA	1	39	Cargentoratense_DSM44202,"Catypicum_R2070","Caurimucosum_ATCC700975","Cbelfantii_FRC0043","Ccallunae_DSM20147","Ccamporealensis_DSM44610","Cdeserti_GIMN1010","Cdiphtheriae_NCTC11397","Cdoosanense_DSM45436","Cefficiens_YS314","Cepidermidicanis_DSM45586","Cfalsenii_DSM44353","Cglutamicum_ATCC13032","Cglycinophilum_AJ3170","Chalotolerans_YIM70093","Chumireducens_DSM45392","Cimitans_DSM44264","Cjeike…	0.0902305	0.0902305	1.79278	0.0902305	0.0902305	1.79278	3330	0
ERS451417_01216	1717.62.peg.1224	NA	NA	NA	1	39	Cargentoratense_DSM44202,"Catypicum_R2070","Caurimucosum_ATCC700975","Cbelfantii_FRC0043","Ccallunae_DSM20147","Ccamporealensis_DSM44610","Cdeserti_GIMN1010","Cdiphtheriae_NCTC11397","Cdoosanense_DSM45436","Cefficiens_YS314","Cepidermidicanis_DSM45586","Cfalsenii_DSM44353","Cglutamicum_ATCC13032","Cglycinophilum_AJ3170","Chalotolerans_YIM70093","Chumireducens_DSM45392","Cimitans_DSM44264","Cjeike…	0.214125	0.214125	1.79625	0.214116	0.214116	1.79625	1026	1	1. 0.61919;2. 390;3. 1168;4. 407;5. 407;6. 1219;7. 426;8. 1276;9. 1006;10. I;11. ATT
ERS451417_01186	1717.62.peg.1195	NA	NA	NA	1	10	Cbelfantii_FRC0043,"Cdiphtheriae_NCTC11397","Cmustelae_DSM45274","Cpseudotuberculosis_31","Cpseudotuberculosis_ATCC19410","Crouxii_FRC0190","Csilvaticum_KL0182","Culcerans_NCTC12077","Culcerans_NCTC7910","Cvitaeruminis_DSM20294"	4.40246	0.123748	3.98981	0.136346	0.123748	3.98982	256	0
ERS451417_01232	1717.62.peg.1240	NA	NA	NA	1	15	Cargentoratense_DSM44202,"Cbelfantii_FRC0043","Cdiphtheriae_NCTC11397","Cepidermidicanis_DSM45586","Ckroppenstedtii_DSM44385","Ckutscheri_DSM20755","Clactis_RW25","Cmustelae_DSM45274","Cpseudotuberculosis_31","Cpseudotuberculosis_ATCC19410","Crouxii_FRC0190","Csilvaticum_KL0182","Culcerans_NCTC12077","Culcerans_NCTC7910","Cvitaeruminis_DSM20294"	0.287626	0.226888	2.17634	0.287626	0.226888	2.17634	2	2	1. 0.7083;2. 5;3. 13;4. 23;5. 23;6. 67;7. 31;8. 91;9. 1;10. Y;11. TAC	1. 0.66921;2. 92;3. 274;4. 110;5. 110;6. 328;7. 118;8. 352;9. 262;10. D;11. GAC
ERS451417_00260	1717.62.peg.254	NA	NA	NA	1	6	Cbelfantii_FRC0043,"Cdiphtheriae_NCTC11397","Cmustelae_DSM45274","Crouxii_FRC0190","Ctestudinoris_DSM44614","Cuterequi_DSM45634"	0.254289	0.254289	2.26256	0.254289	0.254289	2.26256	2050	3	1. 0.41632;2. 601;3. 1801;4. 736;5. 695;6. 2083;7. 751;8. 2251;9. 1336;10. I;11. ATC	1. 0.43848;2. 616;3. 1846;4. 751;5. 710;6. 2128;7. 766;8. 2296;9. 1381;10. V;11. GTG	1. 0.41433;2. 660;3. 1978;4. 795;5. 754;6. 2260;7. 810;8. 2428;9. 1513;10. Q;11. CAG
ERS451417_00403	1717.62.peg.403	NA	NA	NA	1	38	Cargentoratense_DSM44202,"Catypicum_R2070","Caurimucosum_ATCC700975","Cbelfantii_FRC0043","Ccallunae_DSM20147","Ccamporealensis_DSM44610","Cdeserti_GIMN1010","Cdiphtheriae_NCTC11397","Cdoosanense_DSM45436","Cefficiens_YS314","Cepidermidicanis_DSM45586","Cfalsenii_DSM44353","Cglutamicum_ATCC13032","Cglycinophilum_AJ3170","Chalotolerans_YIM70093","Chumireducens_DSM45392","Cimitans_DSM44264","Cjeike…	0.0943873	0.0943873	1.92004	0.0943873	0.0943873	1.92006	258	0
ERS451417_00007	1717.62.peg.8	NA	NA	NA	1	6	Cbelfantii_FRC0043,"Cdiphtheriae_NCTC11397","Cglutamicum_ATCC13032","Crouxii_FRC0190","Csilvaticum_KL0182","Culcerans_NCTC7910"	0.261274	0.261265	2.90752	0.261275	0.261275	2.90752	258	0
ERS451417_00059	1717.62.peg.54	NA	NA	NA	1	3	Cdiphtheriae_NCTC11397,"Cmaris_DSM45190","Crouxii_FRC0190"	0.99999	0.410354	5.11256	1	0.410354	5.11257	128	5	1. 0.59032;2. 33;3. 97;4. 49;5. 34;6. 100;7. 34;8. 100;9. 91;10. I;11. ATC	1. 0.41329;2. 38;3. 112;4. 54;5. 39;6. 115;7. 39;8. 115;9. 106;10. T;11. ACT	1. 0.47897;2. 41;3. 121;4. 57;5. 42;6. 124;7. 42;8. 124;9. 115;10. T;11. ACC	1. 0.59782;2. 73;3. 217;4. 95;5. 74;6. 220;7. 74;8. 220;9. 211;10. V;11. GTC	1. 0.66357;2. 126;3. 376;4. 148;5. 127;6. 379;7. 127;8. 379;9. 370;10. F;11. TTT
ERS451417_00719	1717.62.peg.724	NA	NA	NA	1	34	Cargentoratense_DSM44202,"Caurimucosum_ATCC700975","Cbelfantii_FRC0043","Ccallunae_DSM20147","Ccamporealensis_DSM44610","Cdeserti_GIMN1010","Cdiphtheriae_NCTC11397","Cdoosanense_DSM45436","Cefficiens_YS314","Cepidermidicanis_DSM45586","Cfalsenii_DSM44353","Cglutamicum_ATCC13032","Cglycinophilum_AJ3170","Chalotolerans_YIM70093","Chumireducens_DSM45392","Cimitans_DSM44264","Clactis_RW25","Cmarinum_…	0.145149	0.145149	1.72677	0.145149	0.145149	1.72678	258	0
ERS451417_01189	1717.62.peg.1198	NA	NA	NA	1	24	Cargentoratense_DSM44202,"Cbelfantii_FRC0043","Cdiphtheriae_NCTC11397","Cefficiens_YS314","Cepidermidicanis_DSM45586","Cfalsenii_DSM44353","Cglutamicum_ATCC13032","Cglycinophilum_AJ3170","Chumireducens_DSM45392","Cimitans_DSM44264","Ckroppenstedtii_DSM44385","Ckutscheri_DSM20755","Clactis_RW25","Cpseudotuberculosis_31","Cpseudotuberculosis_ATCC19410","CriegeliiPUDD83A45","Crouxii_FRC0190","Csilva…	0.255295	0.255295	1.68296	0.255295	0.255295	1.68296	3074	1	1. 0.60583;2. 245;3. 733;4. 304;5. 304;6. 910;7. 371;8. 1111;9. 481;10. G;11. GGA
ERS451417_00404	1717.62.peg.404	NA	NA	NA	1	39	Cargentoratense_DSM44202,"Catypicum_R2070","Caurimucosum_ATCC700975","Cbelfantii_FRC0043","Ccallunae_DSM20147","Ccamporealensis_DSM44610","Cdeserti_GIMN1010","Cdiphtheriae_NCTC11397","Cdoosanense_DSM45436","Cefficiens_YS314","Cepidermidicanis_DSM45586","Cfalsenii_DSM44353","Cglutamicum_ATCC13032","Cglycinophilum_AJ3170","Chalotolerans_YIM70093","Chumireducens_DSM45392","Cimitans_DSM44264","Cjeike…	0.560197	0.254509	2.34406	0.377088	0.254509	2.34406	258	0
ERS451417_00795	1717.62.peg.801	NA	NA	NA	1	30	Caurimucosum_ATCC700975,"Cbelfantii_FRC0043","Ccallunae_DSM20147","Cdeserti_GIMN1010","Cdiphtheriae_NCTC11397","Cdoosanense_DSM45436","Cepidermidicanis_DSM45586","Cglutamicum_ATCC13032","Cglycinophilum_AJ3170","Chalotolerans_YIM70093","Chumireducens_DSM45392","Cimitans_DSM44264","Ckutscheri_DSM20755","Cmarinum_DSM44953","Cmaris_DSM45190","Cmustelae_DSM45274","Cpseudotuberculosis_31","Cpseudotuber…	0.279357	0.279357	1.92638	0.279357	0.279357	1.92638	258	0
ERS451417_00701	1717.62.peg.705	NA	NA	NA	1	14	Cbelfantii_FRC0043,"Cdeserti_GIMN1010","Cdiphtheriae_NCTC11397","Chalotolerans_YIM70093","Chumireducens_DSM45392","Cmarinum_DSM44953","Cmustelae_DSM45274","Cpseudotuberculosis_31","Cpseudotuberculosis_ATCC19410","Crouxii_FRC0190","Csilvaticum_KL0182","Ctestudinoris_DSM44614","Culcerans_NCTC12077","Culcerans_NCTC7910"	0.224278	0.224259	1.7535	0.224268	0.224268	1.7535	3330	0
ERS451417_00062	1717.62.peg.58	NA	NA	NA	1	4	Cbelfantii_FRC0043,"Cdiphtheriae_NCTC11397","Crouxii_FRC0190","Csimulans_PES1"	0.534773	0.464584	7.88517	0.534773	0.464584	7.88517	2	3	1. 0.54197;2. 49;3. 145;4. 69;5. 50;6. 148;7. 50;8. 148;9. 142;10. M;11. ATG	1. 0.526;2. 85;3. 253;4. 105;5. 86;6. 256;7. 86;8. 256;9. 250;10. R;11. CGC	1. 0.43649;2. 317;3. 949;4. 374;5. 332;6. 994;7. 340;8. 1018;9. 856;10. I;11. ATA
ERS451417_00881	1717.62.peg.887	NA	NA	NA	1	17	Caurimucosum_ATCC700975,"Cbelfantii_FRC0043","Ccamporealensis_DSM44610","Cdiphtheriae_NCTC11397","Cepidermidicanis_DSM45586","Cjeikeium_K41","Ckutscheri_DSM20755","Clactis_RW25","Cpseudotuberculosis_31","Cpseudotuberculosis_ATCC19410","Crouxii_FRC0190","Csilvaticum_KL0182","Csimulans_PES1","Csingulare_IBSB52218","Culcerans_NCTC12077","Culcerans_NCTC7910","Cuterequi_DSM45634"	0.152662	0.146225	2.66341	0.152662	0.146225	2.66341	2	2	1. 0.56067;2. 126;3. 376;4. 146;5. 146;6. 436;7. 157;8. 469;9. 319;10. I;11. ATA	1. 0.50139;2. 366;3. 1096;4. 386;5. 386;6. 1156;7. 397;8. 1189;9. 1039;10. A;11. GCC
ERS451417_00834	1717.62.peg.838	NA	NA	NA	1	10	Cbelfantii_FRC0043,"Ccallunae_DSM20147","Cdiphtheriae_NCTC11397","Cefficiens_YS314","Ckutscheri_DSM20755","Cpseudotuberculosis_ATCC19410","Crouxii_FRC0190","Csilvaticum_KL0182","Culcerans_NCTC12077","Cvitaeruminis_DSM20294"	1	0.10956	2.25288	1	0.10956	2.25288	2048	3	1. 0.77525;2. 22;3. 64;4. 25;5. 24;6. 70;7. 25;8. 73;9. 52;10. R;11. CGC	1. 0.66495;2. 110;3. 328;4. 128;5. 122;6. 364;7. 130;8. 388;9. 220;10. A;11. GCA	1. 0.58466;2. 128;3. 382;4. 146;5. 140;6. 418;7. 148;8. 442;9. 274;10. M;11. ATG
ERS451417_01249	1717.62.peg.1257	NA	NA	NA	1	39	Cargentoratense_DSM44202,"Catypicum_R2070","Caurimucosum_ATCC700975","Cbelfantii_FRC0043","Ccallunae_DSM20147","Ccamporealensis_DSM44610","Cdeserti_GIMN1010","Cdiphtheriae_NCTC11397","Cdoosanense_DSM45436","Cefficiens_YS314","Cepidermidicanis_DSM45586","Cfalsenii_DSM44353","Cglutamicum_ATCC13032","Cglycinophilum_AJ3170","Chalotolerans_YIM70093","Chumireducens_DSM45392","Cimitans_DSM44264","Cjeike…	0.190937	0.136479	1.77804	0.190966	0.136479	1.77805	2	5	1. 0.63775;2. 33;3. 97;4. 33;5. 33;6. 97;7. 33;8. 97;9. 85;10. Y;11. TAT	1. 0.58834;2. 102;3. 304;4. 102;5. 102;6. 304;7. 102;8. 304;9. 292;10. R;11. CGG	1. 0.6073;2. 141;3. 421;4. 141;5. 141;6. 421;7. 141;8. 421;9. 409;10. E;11. GAA	1. 0.45126;2. 164;3. 490;4. 164;5. 164;6. 490;7. 164;8. 490;9. 478;10. D;11. GAT	1. 0.65391;2. 166;3. 496;4. 166;5. 166;6. 496;7. 166;8. 496;9. 484;10. T;11. ACT
ERS451417_00394	1717.62.peg.394	NA	NA	NA	1	19	Cbelfantii_FRC0043,"Ccamporealensis_DSM44610","Cdiphtheriae_NCTC11397","Chalotolerans_YIM70093","Chumireducens_DSM45392","Cjeikeium_K41","Ckutscheri_DSM20755","Cmarinum_DSM44953","Cmaris_DSM45190","Cmustelae_DSM45274","Crouxii_FRC0190","Csilvaticum_KL0182","Csimulans_PES1","Csingulare_IBSB52218","Ctestudinoris_DSM44614","Culcerans_NCTC12077","Culcerans_NCTC7910","Curealyticum_DSM7109","Cvitaerumi…	0.0739349	0.0739349	1.90295	0.0739349	0.0739349	1.90295	2	1	1. 0.48968;2. 172;3. 514;4. 186;5. 186;6. 556;7. 202;8. 604;9. 466;10. E;11. GAA
ERS451417_00671	1717.62.peg.678	NA	NA	NA	1	16	Cargentoratense_DSM44202,"Cbelfantii_FRC0043","Cdiphtheriae_NCTC11397","Cefficiens_YS314","Cepidermidicanis_DSM45586","Ckroppenstedtii_DSM44385","Ckutscheri_DSM20755","Clactis_RW25","Cmustelae_DSM45274","Cpseudotuberculosis_31","Cpseudotuberculosis_ATCC19410","Crouxii_FRC0190","Csilvaticum_KL0182","Culcerans_NCTC12077","Culcerans_NCTC7910","Cvitaeruminis_DSM20294"	0.0908722	0.0908722	2.74175	0.0908722	0.0908722	2.74175	258	0
ERS451417_00179	1717.62.peg.175	NA	NA	NA	1	39	Cargentoratense_DSM44202,"Catypicum_R2070","Caurimucosum_ATCC700975","Cbelfantii_FRC0043","Ccallunae_DSM20147","Ccamporealensis_DSM44610","Cdeserti_GIMN1010","Cdiphtheriae_NCTC11397","Cdoosanense_DSM45436","Cefficiens_YS314","Cepidermidicanis_DSM45586","Cfalsenii_DSM44353","Cglutamicum_ATCC13032","Cglycinophilum_AJ3170","Chalotolerans_YIM70093","Chumireducens_DSM45392","Cimitans_DSM44264","Cjeike…	0.230143	0.230143	1.61501	0.230152	0.230152	1.61502	2	1	1. 0.57566;2. 226;3. 676;4. 266;5. 266;6. 796;7. 282;8. 844;9. 601;10. D;11. GAC
ERS451417_00854	1717.62.peg.859	NA	NA	NA	1	18	Ccallunae_DSM20147,"Cdeserti_GIMN1010","Cdiphtheriae_NCTC11397","Cefficiens_YS314","Cglutamicum_ATCC13032","Chalotolerans_YIM70093","Chumireducens_DSM45392","Clactis_RW25","Cmarinum_DSM44953","Cmaris_DSM45190","Cmustelae_DSM45274","Cpseudotuberculosis_31","Cpseudotuberculosis_ATCC19410","Crouxii_FRC0190","Ctestudinoris_DSM44614","Culcerans_NCTC12077","Culcerans_NCTC7910","Cvitaeruminis_DSM20294"	0.257071	0.257071	1.65811	0.257071	0.257071	1.65811	2306	0
ERS451417_00413	1717.62.peg.413	NA	NA	NA	1	13	Catypicum_R2070,"Cbelfantii_FRC0043","Ccamporealensis_DSM44610","Cdiphtheriae_NCTC11397","Cepidermidicanis_DSM45586","Ckutscheri_DSM20755","Cpseudotuberculosis_31","Cpseudotuberculosis_ATCC19410","Crouxii_FRC0190","Csilvaticum_KL0182","Csimulans_PES1","Culcerans_NCTC12077","Culcerans_NCTC7910"	0.0876592	0.0876592	2.24697	0.0876691	0.0876691	2.24697	2	1	1. 0.40966;2. 301;3. 901;4. 302;5. 302;6. 904;7. 305;8. 913;9. 853;10. R;11. CGA
ERS451417_00397	1717.62.peg.397	NA	NA	NA	1	39	Cargentoratense_DSM44202,"Catypicum_R2070","Caurimucosum_ATCC700975","Cbelfantii_FRC0043","Ccallunae_DSM20147","Ccamporealensis_DSM44610","Cdeserti_GIMN1010","Cdiphtheriae_NCTC11397","Cdoosanense_DSM45436","Cefficiens_YS314","Cepidermidicanis_DSM45586","Cfalsenii_DSM44353","Cglutamicum_ATCC13032","Cglycinophilum_AJ3170","Chalotolerans_YIM70093","Chumireducens_DSM45392","Cimitans_DSM44264","Cjeike…	0.15823	0.15823	1.64249	0.15823	0.15823	1.64249	258	0
ERS451417_00284	1717.62.peg.285	NA	NA	NA	1	39	Cargentoratense_DSM44202,"Catypicum_R2070","Caurimucosum_ATCC700975","Cbelfantii_FRC0043","Ccallunae_DSM20147","Ccamporealensis_DSM44610","Cdeserti_GIMN1010","Cdiphtheriae_NCTC11397","Cdoosanense_DSM45436","Cefficiens_YS314","Cepidermidicanis_DSM45586","Cfalsenii_DSM44353","Cglutamicum_ATCC13032","Cglycinophilum_AJ3170","Chalotolerans_YIM70093","Chumireducens_DSM45392","Cimitans_DSM44264","Cjeike…	0.209542	0.209542	1.85161	0.209542	0.209542	1.85161	2	1	1. 0.5422;2. 99;3. 295;4. 107;5. 107;6. 319;7. 107;8. 319;9. 292;10. N;11. AAT
ERS451417_00757	1717.62.peg.762	NA	NA	NA	1	39	Cargentoratense_DSM44202,"Catypicum_R2070","Caurimucosum_ATCC700975","Cbelfantii_FRC0043","Ccallunae_DSM20147","Ccamporealensis_DSM44610","Cdeserti_GIMN1010","Cdiphtheriae_NCTC11397","Cdoosanense_DSM45436","Cefficiens_YS314","Cepidermidicanis_DSM45586","Cfalsenii_DSM44353","Cglutamicum_ATCC13032","Cglycinophilum_AJ3170","Chalotolerans_YIM70093","Chumireducens_DSM45392","Cimitans_DSM44264","Cjeike…	0.156833	0.156833	2.32821	0.156833	0.156833	2.32821	258	0
ERS451417_00907	1717.62.peg.913	NA	NA	NA	1	20	Cargentoratense_DSM44202,"Cbelfantii_FRC0043","Ccallunae_DSM20147","Cdeserti_GIMN1010","Cdiphtheriae_NCTC11397","Cefficiens_YS314","Cepidermidicanis_DSM45586","Cglutamicum_ATCC13032","Chalotolerans_YIM70093","Chumireducens_DSM45392","Cmarinum_DSM44953","Cmaris_DSM45190","Cpseudotuberculosis_31","Cpseudotuberculosis_ATCC19410","Crouxii_FRC0190","Csilvaticum_KL0182","Ctestudinoris_DSM44614","Culcer…	0.204194	0.204194	1.93498	0.204194	0.204194	1.93499	3074	1	1. 0.5725;2. 141;3. 421;4. 157;5. 141;6. 421;7. 173;8. 517;9. 340;10. L;11. TTG
ERS451417_00122	1717.62.peg.120	NA	NA	NA	1	8	Cbelfantii_FRC0043,"Cdiphtheriae_NCTC11397","Cpseudotuberculosis_31","Cpseudotuberculosis_ATCC19410","Crouxii_FRC0190","Csilvaticum_KL0182","Culcerans_NCTC12077","Culcerans_NCTC7910"	0.995182	0.196451	3.92805	1	0.196442	3.92805	2048	4	1. 0.87727;2. 19;3. 55;4. 84;5. 29;6. 85;7. 29;8. 85;9. 55;10. A;11. GCA	1. 0.62983;2. 34;3. 100;4. 99;5. 44;6. 130;7. 44;8. 130;9. 100;10. M;11. ATG	1. 0.83321;2. 58;3. 172;4. 123;5. 68;6. 202;7. 68;8. 202;9. 166;10. P;11. CCC	1. 0.55751;2. 84;3. 250;4. 151;5. 94;6. 280;7. 94;8. 280;9. 244;10. D;11. GAC
ERS451417_00712	1717.62.peg.717	NA	NA	NA	1	39	Cargentoratense_DSM44202,"Catypicum_R2070","Caurimucosum_ATCC700975","Cbelfantii_FRC0043","Ccallunae_DSM20147","Ccamporealensis_DSM44610","Cdeserti_GIMN1010","Cdiphtheriae_NCTC11397","Cdoosanense_DSM45436","Cefficiens_YS314","Cepidermidicanis_DSM45586","Cfalsenii_DSM44353","Cglutamicum_ATCC13032","Cglycinophilum_AJ3170","Chalotolerans_YIM70093","Chumireducens_DSM45392","Cimitans_DSM44264","Cjeike…	0.159182	0.159182	1.49291	0.159182	0.159182	1.49291	258	0
ERS451417_00329	1717.62.peg.331	NA	NA	NA	1	7	Cbelfantii_FRC0043,"Ccamporealensis_DSM44610","Cdiphtheriae_NCTC11397","Clactis_RW25","Cmarinum_DSM44953","Crouxii_FRC0190","Csimulans_PES1"	0.150526	0.134552	1.81871	0.159008	0.133617	1.82512	3074	1	1. 0.48623;2. 269;3. 805;4. 334;5. 311;6. 931;7. 352;8. 1054;9. 562;10. I;11. ATT
ERS451417_01015	1717.62.peg.1026	NA	NA	NA	1	39	Cargentoratense_DSM44202,"Catypicum_R2070","Caurimucosum_ATCC700975","Cbelfantii_FRC0043","Ccallunae_DSM20147","Ccamporealensis_DSM44610","Cdeserti_GIMN1010","Cdiphtheriae_NCTC11397","Cdoosanense_DSM45436","Cefficiens_YS314","Cepidermidicanis_DSM45586","Cfalsenii_DSM44353","Cglutamicum_ATCC13032","Cglycinophilum_AJ3170","Chalotolerans_YIM70093","Chumireducens_DSM45392","Cimitans_DSM44264","Cjeike…	0.115991	0.115991	1.70758	0.115991	0.115991	1.70758	2	1	1. 0.61493;2. 22;3. 64;4. 33;5. 33;6. 97;7. 39;8. 115;9. 61;10. V;11. GTG
ERS451417_00238	1717.62.peg.234	NA	NA	NA	1	37	Cargentoratense_DSM44202,"Catypicum_R2070","Caurimucosum_ATCC700975","Cbelfantii_FRC0043","Ccallunae_DSM20147","Ccamporealensis_DSM44610","Cdeserti_GIMN1010","Cdiphtheriae_NCTC11397","Cdoosanense_DSM45436","Cepidermidicanis_DSM45586","Cfalsenii_DSM44353","Cglutamicum_ATCC13032","Cglycinophilum_AJ3170","Chalotolerans_YIM70093","Chumireducens_DSM45392","Cimitans_DSM44264","Cjeikeium_K41","Ckroppens…	0.14966	0.14966	1.49498	0.14966	0.14966	1.49498	3330	0
ERS451417_00808	1717.62.peg.815	NA	NA	NA	1	6	Caurimucosum_ATCC700975,"Cbelfantii_FRC0043","Cdeserti_GIMN1010","Cdiphtheriae_NCTC11397","Cepidermidicanis_DSM45586","Crouxii_FRC0190"	0.172182	0.172182	1.87506	0.172203	0.172203	1.87519	2	4	1. 0.45155;2. 29;3. 85;4. 35;5. 35;6. 103;7. 39;8. 115;9. 40;10. V;11. GTT	1. 0.49341;2. 216;3. 646;4. 249;5. 224;6. 670;7. 230;8. 688;9. 538;10. T;11. ACA	1. 0.45367;2. 228;3. 682;4. 261;5. 236;6. 706;7. 242;8. 724;9. 574;10. E;11. GAG	1. 0.48786;2. 428;3. 1282;4. 531;5. 441;6. 1321;7. 456;8. 1366;9. 1108;10. Q;11. CAG
ERS451417_00182	1717.62.peg.178	NA	NA	NA	1	36	Cargentoratense_DSM44202,"Catypicum_R2070","Caurimucosum_ATCC700975","Cbelfantii_FRC0043","Ccallunae_DSM20147","Ccamporealensis_DSM44610","Cdeserti_GIMN1010","Cdiphtheriae_NCTC11397","Cdoosanense_DSM45436","Cefficiens_YS314","Cepidermidicanis_DSM45586","Cfalsenii_DSM44353","Cglutamicum_ATCC13032","Cglycinophilum_AJ3170","Chalotolerans_YIM70093","Chumireducens_DSM45392","Cjeikeium_K41","Ckroppenst…	0.250914	0.250914	1.32227	0.250914	0.250914	1.32227	1282	0
ERS451417_00533	1717.62.peg.537	NA	NA	NA	1	12	Cbelfantii_FRC0043,"Ccallunae_DSM20147","Cdeserti_GIMN1010","Cdiphtheriae_NCTC11397","Cefficiens_YS314","Cglutamicum_ATCC13032","Chalotolerans_YIM70093","Chumireducens_DSM45392","Cmarinum_DSM44953","Crouxii_FRC0190","Ctestudinoris_DSM44614","Cvitaeruminis_DSM20294"	0.436484	0.0962867	1.87802	0.436484	0.0962867	1.87802	3074	6	1. 0.7694;2. 36;3. 106;4. 52;5. 52;6. 154;7. 55;8. 163;9. 52;10. V;11. GTA	1. 0.7024;2. 83;3. 247;4. 99;5. 99;6. 295;7. 111;8. 331;9. 145;10. L;11. CTG	1. 0.82842;2. 112;3. 334;4. 128;5. 128;6. 382;7. 140;8. 418;9. 232;10. P;11. CCC	1. 0.87597;2. 115;3. 343;4. 131;5. 131;6. 391;7. 143;8. 427;9. 241;10. V;11. GTT	1. 0.88349;2. 119;3. 355;4. 135;5. 135;6. 403;7. 147;8. 439;9. 253;10. A;11. GCA	1. 0.68485;2. 121;3. 361;4. 137;5. 137;6. 409;7. 149;8. 445;9. 259;10. F;11. TTC
ERS451417_00135	1717.62.peg.134	NA	NA	NA	1	14	Caurimucosum_ATCC700975,"Cbelfantii_FRC0043","Ccamporealensis_DSM44610","Cdiphtheriae_NCTC11397","Chumireducens_DSM45392","Cmaris_DSM45190","Cmustelae_DSM45274","Cpseudotuberculosis_31","Crouxii_FRC0190","Csilvaticum_KL0182","Csingulare_IBSB52218","Culcerans_NCTC12077","Culcerans_NCTC7910","Cuterequi_DSM45634"	0.0922814	0.0538074	1.80098	0.0922814	0.0538074	1.80098	2050	3	1. 0.42286;2. 248;3. 742;4. 288;5. 266;6. 796;7. 305;8. 913;9. 520;10. K;11. AAG	1. 0.4422;2. 252;3. 754;4. 292;5. 270;6. 808;7. 309;8. 925;9. 532;10. E;11. GAG	1. 0.52619;2. 285;3. 853;4. 325;5. 303;6. 907;7. 342;8. 1024;9. 631;10. I;11. ATT
ERS451417_00098	1717.62.peg.96	NA	NA	NA	1	10	Cbelfantii_FRC0043,"Cdiphtheriae_NCTC11397","Cmustelae_DSM45274","Cpseudotuberculosis_31","Cpseudotuberculosis_ATCC19410","Crouxii_FRC0190","Csilvaticum_KL0182","Culcerans_NCTC12077","Culcerans_NCTC7910","Cvitaeruminis_DSM20294"	0.135917	0.135917	3.08098	0.135927	0.135917	3.081	258	0
ERS451417_00297	1717.62.peg.298	NA	NA	NA	1	3	Cbelfantii_FRC0043,"Cdiphtheriae_NCTC11397","Crouxii_FRC0190"	0.08395	0.08395		0.08395	0.08395		386	0
ERS451417_00371	1717.62.peg.370	NA	NA	NA	1	39	Cargentoratense_DSM44202,"Catypicum_R2070","Caurimucosum_ATCC700975","Cbelfantii_FRC0043","Ccallunae_DSM20147","Ccamporealensis_DSM44610","Cdeserti_GIMN1010","Cdiphtheriae_NCTC11397","Cdoosanense_DSM45436","Cefficiens_YS314","Cepidermidicanis_DSM45586","Cfalsenii_DSM44353","Cglutamicum_ATCC13032","Cglycinophilum_AJ3170","Chalotolerans_YIM70093","Chumireducens_DSM45392","Cimitans_DSM44264","Cjeike…	0.106818	0.106818	1.86334	0.106818	0.106818	1.86334	2306	0
ERS451417_00817	1717.62.peg.823	NA	NA	NA	1	35	Cargentoratense_DSM44202,"Catypicum_R2070","Caurimucosum_ATCC700975","Cbelfantii_FRC0043","Ccallunae_DSM20147","Ccamporealensis_DSM44610","Cdeserti_GIMN1010","Cdiphtheriae_NCTC11397","Cdoosanense_DSM45436","Cefficiens_YS314","Cepidermidicanis_DSM45586","Cglutamicum_ATCC13032","Chalotolerans_YIM70093","Chumireducens_DSM45392","Cimitans_DSM44264","Ckroppenstedtii_DSM44385","Ckutscheri_DSM20755","Cl…	0.198947	0.198947	1.55076	0.198947	0.198947	1.55076	3074	3	1. 0.40662;2. 66;3. 196;4. 114;5. 93;6. 277;7. 178;8. 532;9. 49;10. D;11. GAT	1. 0.45078;2. 90;3. 268;4. 138;5. 117;6. 349;7. 202;8. 604;9. 121;10. G;11. GGC	1. 0.41205;2. 162;3. 484;4. 210;5. 189;6. 565;7. 274;8. 820;9. 322;10. S;11. TCG
ERS451417_00449	1717.62.peg.452	NA	NA	NA	1	17	Cbelfantii_FRC0043,"Ccallunae_DSM20147","Ccamporealensis_DSM44610","Cdeserti_GIMN1010","Cdiphtheriae_NCTC11397","Cepidermidicanis_DSM45586","Cglutamicum_ATCC13032","Ckutscheri_DSM20755","Cmustelae_DSM45274","Cpseudotuberculosis_31","Cpseudotuberculosis_ATCC19410","Crouxii_FRC0190","Csilvaticum_KL0182","Ctestudinoris_DSM44614","Culcerans_NCTC12077","Culcerans_NCTC7910","Cuterequi_DSM45634"	0.075994	0.075994	2.07353	0.075994	0.075994	2.07354	258	0
ERS451417_01252	1717.62.peg.1260	NA	NA	NA	1	8	Cbelfantii_FRC0043,"Cdiphtheriae_NCTC11397","Cpseudotuberculosis_31","Cpseudotuberculosis_ATCC19410","Crouxii_FRC0190","Csilvaticum_KL0182","Culcerans_NCTC12077","Culcerans_NCTC7910"	0.06166	0.06166	4.11545	0.06166	0.06166	4.11546	1282	0
ERS451417_01037	1717.62.peg.1047	NA	NA	NA	1	32	Caurimucosum_ATCC700975,"Cbelfantii_FRC0043","Ccallunae_DSM20147","Ccamporealensis_DSM44610","Cdeserti_GIMN1010","Cdiphtheriae_NCTC11397","Cdoosanense_DSM45436","Cefficiens_YS314","Cfalsenii_DSM44353","Cglutamicum_ATCC13032","Cglycinophilum_AJ3170","Chalotolerans_YIM70093","Chumireducens_DSM45392","Cimitans_DSM44264","Cjeikeium_K41","Ckutscheri_DSM20755","Clactis_RW25","Cmarinum_DSM44953","Cmaris…	0.244615	0.244615	1.62319	0.244615	0.244615	1.62319	3074	1	1. 0.57915;2. 256;3. 766;4. 321;5. 321;6. 961;7. 515;8. 1543;9. 436;10. G;11. GGC
ERS451417_00029	1717.62.peg.26	NA	NA	NA	1	39	Cargentoratense_DSM44202,"Catypicum_R2070","Caurimucosum_ATCC700975","Cbelfantii_FRC0043","Ccallunae_DSM20147","Ccamporealensis_DSM44610","Cdeserti_GIMN1010","Cdiphtheriae_NCTC11397","Cdoosanense_DSM45436","Cefficiens_YS314","Cepidermidicanis_DSM45586","Cfalsenii_DSM44353","Cglutamicum_ATCC13032","Cglycinophilum_AJ3170","Chalotolerans_YIM70093","Chumireducens_DSM45392","Cimitans_DSM44264","Cjeike…	0.234253	0.234253	2.05298	0.234253	0.234253	2.05297	258	0
ERS451417_00635	1717.62.peg.639	NA	NA	NA	1	7	Cbelfantii_FRC0043,"Cdiphtheriae_NCTC11397","Cpseudotuberculosis_31","Cpseudotuberculosis_ATCC19410","Crouxii_FRC0190","Culcerans_NCTC12077","Culcerans_NCTC7910"	0.187813	0.187813	2.83538	0.187813	0.187813	2.83538	2	1	1. 0.46075;2. 9;3. 25;4. 9;5. 9;6. 25;7. 9;8. 25;9. 25;10. S;11. AGC
ERS451417_00360	1717.62.peg.359	NA	NA	NA	1	39	Cargentoratense_DSM44202,"Catypicum_R2070","Caurimucosum_ATCC700975","Cbelfantii_FRC0043","Ccallunae_DSM20147","Ccamporealensis_DSM44610","Cdeserti_GIMN1010","Cdiphtheriae_NCTC11397","Cdoosanense_DSM45436","Cefficiens_YS314","Cepidermidicanis_DSM45586","Cfalsenii_DSM44353","Cglutamicum_ATCC13032","Cglycinophilum_AJ3170","Chalotolerans_YIM70093","Chumireducens_DSM45392","Cimitans_DSM44264","Cjeike…	0.257651	0.257651	1.65203	0.257651	0.257651	1.65203	258	0
ERS451417_00459	1717.62.peg.463	NA	NA	NA	1	39	Cargentoratense_DSM44202,"Catypicum_R2070","Caurimucosum_ATCC700975","Cbelfantii_FRC0043","Ccallunae_DSM20147","Ccamporealensis_DSM44610","Cdeserti_GIMN1010","Cdiphtheriae_NCTC11397","Cdoosanense_DSM45436","Cefficiens_YS314","Cepidermidicanis_DSM45586","Cfalsenii_DSM44353","Cglutamicum_ATCC13032","Cglycinophilum_AJ3170","Chalotolerans_YIM70093","Chumireducens_DSM45392","Cimitans_DSM44264","Cjeike…	0.186482	0.186482	1.8279	0.186482	0.186482	1.8279	258	0
ERS451417_00999	1717.62.peg.1010	NA	NA	NA	1	39	Cargentoratense_DSM44202,"Catypicum_R2070","Caurimucosum_ATCC700975","Cbelfantii_FRC0043","Ccallunae_DSM20147","Ccamporealensis_DSM44610","Cdeserti_GIMN1010","Cdiphtheriae_NCTC11397","Cdoosanense_DSM45436","Cefficiens_YS314","Cepidermidicanis_DSM45586","Cfalsenii_DSM44353","Cglutamicum_ATCC13032","Cglycinophilum_AJ3170","Chalotolerans_YIM70093","Chumireducens_DSM45392","Cimitans_DSM44264","Cjeike…	0.0819722	0.0819722	1.65585	0.0819722	0.0819722	1.65585	258	0
ERS451417_00266	1717.62.peg.260	NA	NA	NA	1	3	Cdiphtheriae_NCTC11397,"Crouxii_FRC0190","Csilvaticum_KL0182"	0.76758	0.275218	2.42319	0.401455	0.275228	2.42321	2434	0
ERS451417_00566	1717.62.peg.569	NA	NA	NA	1	6	Cbelfantii_FRC0043,"Cdiphtheriae_NCTC11397","Cpseudotuberculosis_31","Cpseudotuberculosis_ATCC19410","Crouxii_FRC0190","Csilvaticum_KL0182"	0.649615	0.478987	3.40585	0.999825	0.478987	3.40584	258	0
ERS451417_00342	1717.62.peg.345	NA	NA	NA	1	33	Cargentoratense_DSM44202,"Catypicum_R2070","Caurimucosum_ATCC700975","Cbelfantii_FRC0043","Ccallunae_DSM20147","Ccamporealensis_DSM44610","Cdeserti_GIMN1010","Cdiphtheriae_NCTC11397","Cdoosanense_DSM45436","Cefficiens_YS314","Cepidermidicanis_DSM45586","Cglutamicum_ATCC13032","Chalotolerans_YIM70093","Chumireducens_DSM45392","Cimitans_DSM44264","Ckutscheri_DSM20755","Clactis_RW25","Cmarinum_DSM44…	0.241785	0.241785	1.68469	0.241785	0.241785	1.6847	3330	0
ERS451417_00962	1717.62.peg.969	NA	NA	NA	1	39	Cargentoratense_DSM44202,"Catypicum_R2070","Caurimucosum_ATCC700975","Cbelfantii_FRC0043","Ccallunae_DSM20147","Ccamporealensis_DSM44610","Cdeserti_GIMN1010","Cdiphtheriae_NCTC11397","Cdoosanense_DSM45436","Cefficiens_YS314","Cepidermidicanis_DSM45586","Cfalsenii_DSM44353","Cglutamicum_ATCC13032","Cglycinophilum_AJ3170","Chalotolerans_YIM70093","Chumireducens_DSM45392","Cimitans_DSM44264","Cjeike…	0.0783787	0.0783787	2.05642	0.0783787	0.0783787	2.05642	258	0
ERS451417_00953	1717.62.peg.960	NA	NA	NA	1	39	Cargentoratense_DSM44202,"Catypicum_R2070","Caurimucosum_ATCC700975","Cbelfantii_FRC0043","Ccallunae_DSM20147","Ccamporealensis_DSM44610","Cdeserti_GIMN1010","Cdiphtheriae_NCTC11397","Cdoosanense_DSM45436","Cefficiens_YS314","Cepidermidicanis_DSM45586","Cfalsenii_DSM44353","Cglutamicum_ATCC13032","Cglycinophilum_AJ3170","Chalotolerans_YIM70093","Chumireducens_DSM45392","Cimitans_DSM44264","Cjeike…	0.21325	0.17469	1.76848	0.21325	0.17469	1.76848	2	1	1. 0.69093;2. 129;3. 385;4. 148;5. 148;6. 442;7. 158;8. 472;9. 340;10. A;11. GCC
ERS451417_00450	1717.62.peg.453	NA	NA	NA	1	15	Cbelfantii_FRC0043,"Ccallunae_DSM20147","Cdeserti_GIMN1010","Cdiphtheriae_NCTC11397","Cepidermidicanis_DSM45586","Cglutamicum_ATCC13032","Ckutscheri_DSM20755","Cmustelae_DSM45274","Cpseudotuberculosis_31","Cpseudotuberculosis_ATCC19410","Crouxii_FRC0190","Csilvaticum_KL0182","Ctestudinoris_DSM44614","Culcerans_NCTC12077","Culcerans_NCTC7910"	0.122297	0.122297	1.87591	0.122297	0.122297	1.87591	2	2	1. 0.53536;2. 324;3. 970;4. 330;5. 329;6. 985;7. 351;8. 1051;9. 805;10. M;11. ATG	1. 0.51352;2. 488;3. 1462;4. 499;5. 493;6. 1477;7. 521;8. 1561;9. 1249;10. N;11. AAC
ERS451417_00970	1717.62.peg.978	NA	NA	NA	1	11	Cbelfantii_FRC0043,"Cdiphtheriae_NCTC11397","Cepidermidicanis_DSM45586","Ckutscheri_DSM20755","Cpseudotuberculosis_31","Cpseudotuberculosis_ATCC19410","Crouxii_FRC0190","Csilvaticum_KL0182","Ctestudinoris_DSM44614","Culcerans_NCTC12077","Culcerans_NCTC7910"	0.156849	0.156849	3.06407	0.183226	0.157121	3.0679	2	2	1. 0.711;2. 111;3. 331;4. 154;5. 136;6. 406;7. 140;8. 418;9. 223;10. I;11. ATA	1. 0.4455;2. 114;3. 340;4. 157;5. 139;6. 415;7. 143;8. 427;9. 232;10. A;11. GCT
ERS451417_00221	1717.62.peg.218	NA	NA	NA	1	10	Cbelfantii_FRC0043,"Cdiphtheriae_NCTC11397","Ckutscheri_DSM20755","Cpseudotuberculosis_31","Cpseudotuberculosis_ATCC19410","Crouxii_FRC0190","Csilvaticum_KL0182","Culcerans_NCTC12077","Culcerans_NCTC7910","Cvitaeruminis_DSM20294"	0.465721	0.0775122	2.42666	0.465721	0.0775122	2.42665	2050	8	1. 0.47756;2. 30;3. 88;4. 56;5. 30;6. 88;7. 30;8. 88;9. 67;10. N;11. AAC	1. 0.42652;2. 77;3. 229;4. 124;5. 91;6. 271;7. 92;8. 274;9. 184;10. T;11. ACC	1. 0.62539;2. 78;3. 232;4. 125;5. 92;6. 274;7. 93;8. 277;9. 187;10. T;11. ACC	1. 0.51486;2. 81;3. 241;4. 128;5. 95;6. 283;7. 96;8. 286;9. 196;10. V;11. GTC	1. 0.58055;2. 131;3. 391;4. 178;5. 145;6. 433;7. 146;8. 436;9. 346;10. V;11. GTC	1. 0.52756;2. 158;3. 472;4. 211;5. 178;6. 532;7. 179;8. 535;9. 409;10. D;11. GAC	1. 0.54764;2. 369;3. 1105;4. 443;5. 392;6. 1174;7. 399;8. 1195;9. 925;10. A;11. GCC	1. 0.62148;2. 380;3. 1138;4. 454;5. 403;6. 1207;7. 410;8. 1228;9. 958;10. S;11. TCC
ERS451417_00782	1717.62.peg.789	NA	NA	NA	1	39	Cargentoratense_DSM44202,"Catypicum_R2070","Caurimucosum_ATCC700975","Cbelfantii_FRC0043","Ccallunae_DSM20147","Ccamporealensis_DSM44610","Cdeserti_GIMN1010","Cdiphtheriae_NCTC11397","Cdoosanense_DSM45436","Cefficiens_YS314","Cepidermidicanis_DSM45586","Cfalsenii_DSM44353","Cglutamicum_ATCC13032","Cglycinophilum_AJ3170","Chalotolerans_YIM70093","Chumireducens_DSM45392","Cimitans_DSM44264","Cjeike…	0.124443	0.124443	1.80057	0.124443	0.124443	1.80057	1026	3	1. 0.4956;2. 218;3. 652;4. 240;5. 240;6. 718;7. 244;8. 730;9. 556;10. A;11. GCA	1. 0.58088;2. 279;3. 835;4. 301;5. 301;6. 901;7. 305;8. 913;9. 739;10. Q;11. CAG	1. 0.50853;2. 303;3. 907;4. 327;5. 327;6. 979;7. 331;8. 991;9. 811;10. D;11. GAC
ERS451417_01158	1717.62.peg.1169	NA	NA	NA	1	39	Cargentoratense_DSM44202,"Catypicum_R2070","Caurimucosum_ATCC700975","Cbelfantii_FRC0043","Ccallunae_DSM20147","Ccamporealensis_DSM44610","Cdeserti_GIMN1010","Cdiphtheriae_NCTC11397","Cdoosanense_DSM45436","Cefficiens_YS314","Cepidermidicanis_DSM45586","Cfalsenii_DSM44353","Cglutamicum_ATCC13032","Cglycinophilum_AJ3170","Chalotolerans_YIM70093","Chumireducens_DSM45392","Cimitans_DSM44264","Cjeike…	0.163562	0.151377	1.7466	0.163562	0.151377	1.7466	2	1	1. 0.57386;2. 201;3. 601;4. 219;5. 219;6. 655;7. 261;8. 781;9. 523;10. I;11. ATC
ERS451417_00363	1717.62.peg.362	NA	NA	NA	1	7	Caurimucosum_ATCC700975,"Cbelfantii_FRC0043","Cdiphtheriae_NCTC11397","Cepidermidicanis_DSM45586","Cimitans_DSM44264","Crouxii_FRC0190","Ctestudinoris_DSM44614"	1	0.140705	2.21579	0.140575	0.140575	2.21398	3328	0
ERS451417_01207	1717.62.peg.1215	NA	NA	NA	1	8	Cbelfantii_FRC0043,"Cdiphtheriae_NCTC11397","Cpseudotuberculosis_31","Cpseudotuberculosis_ATCC19410","Crouxii_FRC0190","Csilvaticum_KL0182","Culcerans_NCTC12077","Culcerans_NCTC7910"	0.350336	0.350336	3.50995	0.350336	0.350336	3.50995	2	4	1. 0.57161;2. 117;3. 349;4. 147;5. 122;6. 364;7. 122;8. 364;9. 346;10. P;11. CCG	1. 0.47305;2. 263;3. 787;4. 401;5. 271;6. 811;7. 273;8. 817;9. 754;10. A;11. GCA	1. 0.45956;2. 442;3. 1324;4. 605;5. 454;6. 1360;7. 467;8. 1399;9. 1213;10. A;11. GCG	1. 0.46099;2. 445;3. 1333;4. 608;5. 457;6. 1369;7. 470;8. 1408;9. 1222;10. A;11. GCA
ERS451417_00819	1717.62.peg.825	NA	NA	NA	1	8	Cbelfantii_FRC0043,"Cdiphtheriae_NCTC11397","Cpseudotuberculosis_31","Cpseudotuberculosis_ATCC19410","Crouxii_FRC0190","Csilvaticum_KL0182","Culcerans_NCTC12077","Culcerans_NCTC7910"	0.0606941	0.0606941	2.50404	0.0606941	0.0606941	2.50404	2	2	1. 0.40025;2. 63;3. 187;4. 103;5. 63;6. 187;7. 63;8. 187;9. 181;10. T;11. ACT	1. 0.47689;2. 154;3. 460;4. 201;5. 156;6. 466;7. 166;8. 496;9. 406;10. A;11. GCT
ERS451417_01176	1717.62.peg.1185	NA	NA	NA	1	8	Cbelfantii_FRC0043,"Cdiphtheriae_NCTC11397","Cpseudotuberculosis_31","Cpseudotuberculosis_ATCC19410","Crouxii_FRC0190","Csilvaticum_KL0182","Culcerans_NCTC12077","Culcerans_NCTC7910"	0.682751	0.682751	3.581	0.682751	0.682751	3.58099	2306	0
ERS451417_00152	1717.62.peg.149	NA	NA	NA	1	38	Cargentoratense_DSM44202,"Catypicum_R2070","Caurimucosum_ATCC700975","Cbelfantii_FRC0043","Ccallunae_DSM20147","Ccamporealensis_DSM44610","Cdeserti_GIMN1010","Cdiphtheriae_NCTC11397","Cdoosanense_DSM45436","Cefficiens_YS314","Cepidermidicanis_DSM45586","Cfalsenii_DSM44353","Cglutamicum_ATCC13032","Cglycinophilum_AJ3170","Chalotolerans_YIM70093","Chumireducens_DSM45392","Cimitans_DSM44264","Cjeike…	0.849701	0.121102	2.07222	0.121218	0.121218	2.07237	1282	0
ERS451417_01046	1717.62.peg.1056	NA	NA	NA	1	39	Cargentoratense_DSM44202,"Catypicum_R2070","Caurimucosum_ATCC700975","Cbelfantii_FRC0043","Ccallunae_DSM20147","Ccamporealensis_DSM44610","Cdeserti_GIMN1010","Cdiphtheriae_NCTC11397","Cdoosanense_DSM45436","Cefficiens_YS314","Cepidermidicanis_DSM45586","Cfalsenii_DSM44353","Cglutamicum_ATCC13032","Cglycinophilum_AJ3170","Chalotolerans_YIM70093","Chumireducens_DSM45392","Cimitans_DSM44264","Cjeike…	0.209131	0.209131	1.70027	0.209131	0.209131	1.70027	3330	0
ERS451417_00634	1717.62.peg.638	NA	NA	NA	1	39	Cargentoratense_DSM44202,"Catypicum_R2070","Caurimucosum_ATCC700975","Cbelfantii_FRC0043","Ccallunae_DSM20147","Ccamporealensis_DSM44610","Cdeserti_GIMN1010","Cdiphtheriae_NCTC11397","Cdoosanense_DSM45436","Cefficiens_YS314","Cepidermidicanis_DSM45586","Cfalsenii_DSM44353","Cglutamicum_ATCC13032","Cglycinophilum_AJ3170","Chalotolerans_YIM70093","Chumireducens_DSM45392","Cimitans_DSM44264","Cjeike…	0.120161	0.120161	1.67322	0.120161	0.120161	1.67322	2	2	1. 0.60782;2. 505;3. 1513;4. 539;5. 539;6. 1615;7. 555;8. 1663;9. 1438;10. I;11. ATT	1. 0.50571;2. 542;3. 1624;4. 576;5. 576;6. 1726;7. 596;8. 1786;9. 1516;10. E;11. GAG
ERS451417_00931	1717.62.peg.938	NA	NA	NA	1	36	Catypicum_R2070,"Caurimucosum_ATCC700975","Cbelfantii_FRC0043","Ccallunae_DSM20147","Ccamporealensis_DSM44610","Cdeserti_GIMN1010","Cdiphtheriae_NCTC11397","Cdoosanense_DSM45436","Cefficiens_YS314","Cepidermidicanis_DSM45586","Cfalsenii_DSM44353","Cglutamicum_ATCC13032","Cglycinophilum_AJ3170","Chalotolerans_YIM70093","Chumireducens_DSM45392","Cjeikeium_K41","Ckroppenstedtii_DSM44385","Ckutscheri…	0.216749	0.216749	1.49608	0.216758	0.216758	1.49608	3330	0
ERS451417_00040	1717.62.peg.36	NA	NA	NA	1	14	Caurimucosum_ATCC700975,"Cbelfantii_FRC0043","Cdiphtheriae_NCTC11397","Cepidermidicanis_DSM45586","Cfalsenii_DSM44353","Cjeikeium_K41","CriegeliiPUDD83A45","Crouxii_FRC0190","Csimulans_PES1","Csingulare_IBSB52218","Culcerans_NCTC12077","Culcerans_NCTC7910","Cureicelerivorans_IMMIBRIV2301","Cvitaeruminis_DSM20294"	0.255531	0.255531	2.30159	0.255531	0.255531	2.3016	3074	1	1. 0.40434;2. 83;3. 247;4. 322;5. 104;6. 310;7. 110;8. 328;9. 229;10. S;11. TCT
ERS451417_00623	1717.62.peg.627	NA	NA	NA	1	3	Cbelfantii_FRC0043,"Cdiphtheriae_NCTC11397","Crouxii_FRC0190"	0.291805	0.273123	6.84131	0.291805	0.273123	6.84131	386	0
ERS451417_00067	1717.62.peg.63	NA	NA	NA	1	15	Cbelfantii_FRC0043,"Cdiphtheriae_NCTC11397","Cdoosanense_DSM45436","Cefficiens_YS314","Chalotolerans_YIM70093","Chumireducens_DSM45392","Cmarinum_DSM44953","Cpseudotuberculosis_31","Cpseudotuberculosis_ATCC19410","Crouxii_FRC0190","Csilvaticum_KL0182","Ctestudinoris_DSM44614","Culcerans_NCTC12077","Culcerans_NCTC7910","Cvitaeruminis_DSM20294"	0.110791	0.110791	1.94887	0.110791	0.110791	1.94887	2306	0
ERS451417_00847	1717.62.peg.852	NA	NA	NA	1	36	Cargentoratense_DSM44202,"Catypicum_R2070","Caurimucosum_ATCC700975","Cbelfantii_FRC0043","Ccallunae_DSM20147","Ccamporealensis_DSM44610","Cdeserti_GIMN1010","Cdiphtheriae_NCTC11397","Cdoosanense_DSM45436","Cefficiens_YS314","Cepidermidicanis_DSM45586","Cfalsenii_DSM44353","Cglutamicum_ATCC13032","Cglycinophilum_AJ3170","Chalotolerans_YIM70093","Chumireducens_DSM45392","Cimitans_DSM44264","Cjeike…	0.116338	0.116338	1.74858	0.116338	0.116338	1.74858	1282	0
ERS451417_00841	1717.62.peg.846	NA	NA	NA	1	4	Cbelfantii_FRC0043,"Cdiphtheriae_NCTC11397","Crouxii_FRC0190","Culcerans_NCTC7910"	0.341823	0.341823	1.88752	0.341823	0.341823	1.88752	258	0
ERS451417_00400	1717.62.peg.400	NA	NA	NA	1	39	Cargentoratense_DSM44202,"Catypicum_R2070","Caurimucosum_ATCC700975","Cbelfantii_FRC0043","Ccallunae_DSM20147","Ccamporealensis_DSM44610","Cdeserti_GIMN1010","Cdiphtheriae_NCTC11397","Cdoosanense_DSM45436","Cefficiens_YS314","Cepidermidicanis_DSM45586","Cfalsenii_DSM44353","Cglutamicum_ATCC13032","Cglycinophilum_AJ3170","Chalotolerans_YIM70093","Chumireducens_DSM45392","Cimitans_DSM44264","Cjeike…	0.321213	0.0674612	2.85346	0.150544	0.0674612	2.85346	258	0
ERS451417_00777	1717.62.peg.784	NA	NA	NA	1	39	Cargentoratense_DSM44202,"Catypicum_R2070","Caurimucosum_ATCC700975","Cbelfantii_FRC0043","Ccallunae_DSM20147","Ccamporealensis_DSM44610","Cdeserti_GIMN1010","Cdiphtheriae_NCTC11397","Cdoosanense_DSM45436","Cefficiens_YS314","Cepidermidicanis_DSM45586","Cfalsenii_DSM44353","Cglutamicum_ATCC13032","Cglycinophilum_AJ3170","Chalotolerans_YIM70093","Chumireducens_DSM45392","Cimitans_DSM44264","Cjeike…	0.160045	0.157274	1.90106	0.160045	0.157274	1.90106	2	4	1. 0.40212;2. 146;3. 436;4. 178;5. 178;6. 532;7. 196;8. 586;9. 322;10. I;11. ATT	1. 0.65644;2. 159;3. 475;4. 191;5. 191;6. 571;7. 209;8. 625;9. 361;10. N;11. AAC	1. 0.40383;2. 477;3. 1429;4. 513;5. 513;6. 1537;7. 531;8. 1591;9. 1309;10. E;11. GAG	1. 0.49306;2. 600;3. 1798;4. 643;5. 643;6. 1927;7. 661;8. 1981;9. 1657;10. E;11. GAA
ERS451417_00640	1717.62.peg.644	NA	NA	NA	1	39	Cargentoratense_DSM44202,"Catypicum_R2070","Caurimucosum_ATCC700975","Cbelfantii_FRC0043","Ccallunae_DSM20147","Ccamporealensis_DSM44610","Cdeserti_GIMN1010","Cdiphtheriae_NCTC11397","Cdoosanense_DSM45436","Cefficiens_YS314","Cepidermidicanis_DSM45586","Cfalsenii_DSM44353","Cglutamicum_ATCC13032","Cglycinophilum_AJ3170","Chalotolerans_YIM70093","Chumireducens_DSM45392","Cimitans_DSM44264","Cjeike…	0.131749	0.131749	1.74496	0.131749	0.131749	1.74495	3074	1	1. 0.59611;2. 147;3. 439;4. 164;5. 164;6. 490;7. 204;8. 610;9. 289;10. V;11. GTA
ERS451417_00805	1717.62.peg.812	NA	NA	NA	1	3	Cbelfantii_FRC0043,"Cdiphtheriae_NCTC11397","Crouxii_FRC0190"	0.130689	0.130689	3.65236	0.130689	0.130689	3.65236	130	2	1. 0.57265;2. 177;3. 529;4. 227;5. 180;6. 538;7. 180;8. 538;9. 529;10. L;11. CTC	1. 0.41994;2. 182;3. 544;4. 232;5. 185;6. 553;7. 185;8. 553;9. 544;10. I;11. ATC
ERS451417_00372	1717.62.peg.371	NA	NA	NA	1	5	Cdiphtheriae_NCTC11397,"Cpseudotuberculosis_ATCC19410","Crouxii_FRC0190","Csilvaticum_KL0182","Culcerans_NCTC12077"	0.242438	0.168651	2.47672	0.242438	0.168651	2.47672	2	3	1. 0.51683;2. 75;3. 223;4. 79;5. 76;6. 226;7. 77;8. 229;9. 184;10. T;11. ACC	1. 0.57074;2. 183;3. 547;4. 189;5. 184;6. 550;7. 185;8. 553;9. 508;10. K;11. AAA	1. 0.48014;2. 226;3. 676;4. 233;5. 227;6. 679;7. 228;8. 682;9. 637;10. T;11. ACA
ERS451417_00943	1717.62.peg.950	NA	NA	NA	1	14	Catypicum_R2070,"Cbelfantii_FRC0043","Cdiphtheriae_NCTC11397","Cepidermidicanis_DSM45586","Ckutscheri_DSM20755","Clactis_RW25","Cpseudotuberculosis_31","Cpseudotuberculosis_ATCC19410","Crouxii_FRC0190","Csilvaticum_KL0182","Culcerans_NCTC12077","Culcerans_NCTC7910","Cuterequi_DSM45634","Cvitaeruminis_DSM20294"	0.147569	0.147569	1.95955	0.147569	0.147569	1.95955	258	0
ERS451417_00288	1717.62.peg.289	NA	NA	NA	1	25	Catypicum_R2070,"Cbelfantii_FRC0043","Ccallunae_DSM20147","Cdeserti_GIMN1010","Cdiphtheriae_NCTC11397","Cefficiens_YS314","Cepidermidicanis_DSM45586","Cglutamicum_ATCC13032","Chalotolerans_YIM70093","Chumireducens_DSM45392","Cimitans_DSM44264","Ckutscheri_DSM20755","Clactis_RW25","Cmarinum_DSM44953","Cmaris_DSM45190","Cmustelae_DSM45274","Cpseudotuberculosis_31","Cpseudotuberculosis_ATCC19410","C…	0.23493	0.23493	1.59449	0.23493	0.23493	1.59449	3330	0
ERS451417_00254	1717.62.peg.249	NA	NA	NA	1	8	Cargentoratense_DSM44202,"Cbelfantii_FRC0043","Cdiphtheriae_NCTC11397","Cmustelae_DSM45274","Cpseudotuberculosis_ATCC19410","Crouxii_FRC0190","Culcerans_NCTC12077","Culcerans_NCTC7910"	0.114997	0.114997	2.7537	0.114997	0.114997	2.7537	2	2	1. 0.57417;2. 57;3. 169;4. 71;5. 71;6. 211;7. 75;8. 223;9. 97;10. Q;11. CAG	1. 0.41533;2. 391;3. 1171;4. 407;5. 407;6. 1219;7. 418;8. 1252;9. 979;10. T;11. ACG
ERS451417_00974	1717.62.peg.984	NA	NA	NA	1	36	Cargentoratense_DSM44202,"Catypicum_R2070","Caurimucosum_ATCC700975","Cbelfantii_FRC0043","Ccallunae_DSM20147","Ccamporealensis_DSM44610","Cdeserti_GIMN1010","Cdiphtheriae_NCTC11397","Cdoosanense_DSM45436","Cefficiens_YS314","Cepidermidicanis_DSM45586","Cfalsenii_DSM44353","Cglutamicum_ATCC13032","Chalotolerans_YIM70093","Chumireducens_DSM45392","Cimitans_DSM44264","Cjeikeium_K41","Ckroppenstedti…	0.185652	0.185652	1.60751	0.185652	0.185652	1.60751	2050	1	1. 0.51614;2. 639;3. 1915;4. 675;5. 654;6. 1960;7. 739;8. 2215;9. 1492;10. A;11. GCA
ERS451417_00975	1717.62.peg.985	NA	NA	NA	1	36	Cargentoratense_DSM44202,"Catypicum_R2070","Caurimucosum_ATCC700975","Cbelfantii_FRC0043","Ccallunae_DSM20147","Ccamporealensis_DSM44610","Cdeserti_GIMN1010","Cdiphtheriae_NCTC11397","Cdoosanense_DSM45436","Cefficiens_YS314","Cepidermidicanis_DSM45586","Cfalsenii_DSM44353","Cglutamicum_ATCC13032","Chalotolerans_YIM70093","Chumireducens_DSM45392","Cimitans_DSM44264","Cjeikeium_K41","Ckroppenstedti…	0.20581	0.20581	1.70547	0.20581	0.20581	1.70547	2050	4	1. 0.64219;2. 181;3. 541;4. 201;5. 201;6. 601;7. 271;8. 811;9. 253;10. V;11. GTG	1. 0.51874;2. 264;3. 790;4. 284;5. 284;6. 850;7. 354;8. 1060;9. 472;10. T;11. ACA	1. 0.48845;2. 536;3. 1606;4. 556;5. 556;6. 1666;7. 626;8. 1876;9. 1270;10. F;11. TTT	1. 0.43115;2. 558;3. 1672;4. 578;5. 578;6. 1732;7. 648;8. 1942;9. 1300;10. A;11. GCA
ERS451417_00300	1717.62.peg.301	NA	NA	NA	1	3	Cbelfantii_FRC0043,"Cdiphtheriae_NCTC11397","Crouxii_FRC0190"	0.16066	0.16066	4.31216	0.16066	0.16066	4.31216	386	0
ERS451417_00002	1717.62.peg.3	NA	NA	NA	1	39	Cargentoratense_DSM44202,"Catypicum_R2070","Caurimucosum_ATCC700975","Cbelfantii_FRC0043","Ccallunae_DSM20147","Ccamporealensis_DSM44610","Cdeserti_GIMN1010","Cdiphtheriae_NCTC11397","Cdoosanense_DSM45436","Cefficiens_YS314","Cepidermidicanis_DSM45586","Cfalsenii_DSM44353","Cglutamicum_ATCC13032","Cglycinophilum_AJ3170","Chalotolerans_YIM70093","Chumireducens_DSM45392","Cimitans_DSM44264","Cjeike…	0.185217	0.185217	1.76896	0.185217	0.185217	1.76896	2050	2	1. 0.51848;2. 140;3. 418;4. 195;5. 195;6. 583;7. 215;8. 643;9. 304;10. A;11. GCG	1. 0.4349;2. 367;3. 1099;4. 426;5. 426;6. 1276;7. 451;8. 1351;9. 892;10. T;11. ACG
ERS451417_00779	1717.62.peg.786	NA	NA	NA	1	34	Cargentoratense_DSM44202,"Catypicum_R2070","Caurimucosum_ATCC700975","Cbelfantii_FRC0043","Ccallunae_DSM20147","Ccamporealensis_DSM44610","Cdeserti_GIMN1010","Cdiphtheriae_NCTC11397","Cdoosanense_DSM45436","Cefficiens_YS314","Cepidermidicanis_DSM45586","Cfalsenii_DSM44353","Cglutamicum_ATCC13032","Chalotolerans_YIM70093","Chumireducens_DSM45392","Cimitans_DSM44264","Cjeikeium_K41","Ckutscheri_DSM…	0.410258	0.410258	1.5524	0.410258	0.410258	1.5524	3330	0
ERS451417_00835	1717.62.peg.839	NA	NA	NA	1	39	Cargentoratense_DSM44202,"Catypicum_R2070","Caurimucosum_ATCC700975","Cbelfantii_FRC0043","Ccallunae_DSM20147","Ccamporealensis_DSM44610","Cdeserti_GIMN1010","Cdiphtheriae_NCTC11397","Cdoosanense_DSM45436","Cefficiens_YS314","Cepidermidicanis_DSM45586","Cfalsenii_DSM44353","Cglutamicum_ATCC13032","Cglycinophilum_AJ3170","Chalotolerans_YIM70093","Chumireducens_DSM45392","Cimitans_DSM44264","Cjeike…	0.179423	0.179423	1.93704	0.179423	0.179423	1.93704	2	1	1. 0.53027;2. 153;3. 457;4. 197;5. 197;6. 589;7. 250;8. 748;9. 358;10. A;11. GCG
ERS451417_00581	1717.62.peg.584	NA	NA	NA	1	9	Cargentoratense_DSM44202,"Cbelfantii_FRC0043","Ccallunae_DSM20147","Cdiphtheriae_NCTC11397","Cglutamicum_ATCC13032","Ckutscheri_DSM20755","Cpseudotuberculosis_ATCC19410","Crouxii_FRC0190","Cvitaeruminis_DSM20294"	0.153054	0.144562	1.61183	0.144671	0.144562	1.61183	2306	0
ERS451417_01274	1717.62.peg.1282	NA	NA	NA	1	17	Cargentoratense_DSM44202,"Cbelfantii_FRC0043","Cdiphtheriae_NCTC11397","Cefficiens_YS314","Cepidermidicanis_DSM45586","Cglutamicum_ATCC13032","Ckroppenstedtii_DSM44385","Ckutscheri_DSM20755","Clactis_RW25","Cmustelae_DSM45274","Cpseudotuberculosis_31","Cpseudotuberculosis_ATCC19410","Crouxii_FRC0190","Csilvaticum_KL0182","Culcerans_NCTC12077","Culcerans_NCTC7910","Cvitaeruminis_DSM20294"	0.236819	0.236819	2.08569	0.236819	0.236819	2.0857	2050	2	1. 0.51879;2. 272;3. 814;4. 301;5. 301;6. 901;7. 387;8. 1159;9. 523;10. A;11. GCA	1. 0.48109;2. 478;3. 1432;4. 507;5. 507;6. 1519;7. 599;8. 1795;9. 1096;10. F;11. TTC
ERS451417_00133	1717.62.peg.132	NA	NA	NA	1	3	Cbelfantii_FRC0043,"Cdiphtheriae_NCTC11397","Crouxii_FRC0190"	0.178187	0.145916	5.13315	0.178187	0.145916	5.13315	130	2	1. 0.64599;2. 49;3. 145;4. 115;5. 69;6. 205;7. 69;8. 205;9. 142;10. Y;11. TAT	1. 0.42277;2. 53;3. 157;4. 119;5. 73;6. 217;7. 73;8. 217;9. 154;10. A;11. GCA
1717.62.peg.556	1717.62.peg.556	NA	NA	NA	1	25	Caurimucosum_ATCC700975,"Cbelfantii_FRC0043","Ccallunae_DSM20147","Ccamporealensis_DSM44610","Cdiphtheriae_NCTC11397","Cdoosanense_DSM45436","Cefficiens_YS314","Cglutamicum_ATCC13032","Chalotolerans_YIM70093","Cimitans_DSM44264","Ckutscheri_DSM20755","Cmarinum_DSM44953","Cmaris_DSM45190","Cmustelae_DSM45274","Cpseudotuberculosis_ATCC19410","CriegeliiPUDD83A45","Crouxii_FRC0190","Csilvaticum_KL018…	0.426922	0.426922	1.49229	0.426922	0.426922	1.49229	1282	0
ERS451417_00089	1717.62.peg.86	NA	NA	NA	1	16	Cargentoratense_DSM44202,"Cbelfantii_FRC0043","Ccallunae_DSM20147","Cdeserti_GIMN1010","Cdiphtheriae_NCTC11397","Cfalsenii_DSM44353","Cglutamicum_ATCC13032","Cjeikeium_K41","Ckutscheri_DSM20755","Cmustelae_DSM45274","Cpseudotuberculosis_31","Crouxii_FRC0190","Csilvaticum_KL0182","Culcerans_NCTC12077","Culcerans_NCTC7910","Cvitaeruminis_DSM20294"	0.209752	0.209752	2.1443	0.209752	0.209752	2.14431	2	2	1. 0.51001;2. 91;3. 271;4. 134;5. 98;6. 292;7. 98;8. 292;9. 256;10. E;11. GAG	1. 0.54092;2. 146;3. 436;4. 196;5. 153;6. 457;7. 153;8. 457;9. 421;10. D;11. GAT
ERS451417_00769	1717.62.peg.774	NA	NA	NA	1	30	Catypicum_R2070,"Caurimucosum_ATCC700975","Cbelfantii_FRC0043","Ccamporealensis_DSM44610","Cdeserti_GIMN1010","Cdiphtheriae_NCTC11397","Cdoosanense_DSM45436","Cefficiens_YS314","Cepidermidicanis_DSM45586","Cglutamicum_ATCC13032","Chalotolerans_YIM70093","Chumireducens_DSM45392","Cimitans_DSM44264","Ckutscheri_DSM20755","Cmarinum_DSM44953","Cmaris_DSM45190","Cmustelae_DSM45274","Cpseudotuberculosi…	0.322462	0.322462	1.5954	0.322462	0.322462	1.5954	3330	0
ERS451417_01209	1717.62.peg.1217	NA	NA	NA	1	32	Cargentoratense_DSM44202,"Catypicum_R2070","Cbelfantii_FRC0043","Ccallunae_DSM20147","Cdeserti_GIMN1010","Cdiphtheriae_NCTC11397","Cefficiens_YS314","Cepidermidicanis_DSM45586","Cfalsenii_DSM44353","Cglutamicum_ATCC13032","Cglycinophilum_AJ3170","Chalotolerans_YIM70093","Chumireducens_DSM45392","Cimitans_DSM44264","Cjeikeium_K41","Ckroppenstedtii_DSM44385","Ckutscheri_DSM20755","Clactis_RW25","Cm…	0.212171	0.212171	1.50112	0.212171	0.212171	1.50112	3330	0
ERS451417_01236	1717.62.peg.1244	NA	NA	NA	1	13	Cbelfantii_FRC0043,"Cdiphtheriae_NCTC11397","Cepidermidicanis_DSM45586","Ckroppenstedtii_DSM44385","Ckutscheri_DSM20755","Cmustelae_DSM45274","Cpseudotuberculosis_31","Cpseudotuberculosis_ATCC19410","Crouxii_FRC0190","Csilvaticum_KL0182","Culcerans_NCTC12077","Culcerans_NCTC7910","Cvitaeruminis_DSM20294"	0.276489	0.206644	1.71435	0.276489	0.206645	1.71435	2050	5	1. 0.62314;2. 136;3. 406;4. 187;5. 175;6. 523;7. 211;8. 631;9. 316;10. R;11. CGA	1. 0.61386;2. 271;3. 811;4. 339;5. 313;6. 937;7. 359;8. 1075;9. 622;10. T;11. ACT	1. 0.43371;2. 355;3. 1063;4. 441;5. 397;6. 1189;7. 452;8. 1354;9. 793;10. A;11. GCC	1. 0.56995;2. 378;3. 1132;4. 464;5. 420;6. 1258;7. 475;8. 1423;9. 862;10. M;11. ATG	1. 0.5849;2. 397;3. 1189;4. 483;5. 439;6. 1315;7. 494;8. 1480;9. 919;10. H;11. CAT
ERS451417_01258	1717.62.peg.1266	NA	NA	NA	1	18	Cargentoratense_DSM44202,"Cbelfantii_FRC0043","Ccallunae_DSM20147","Cdeserti_GIMN1010","Cdiphtheriae_NCTC11397","Cdoosanense_DSM45436","Cepidermidicanis_DSM45586","Cglutamicum_ATCC13032","Chalotolerans_YIM70093","Chumireducens_DSM45392","Ckutscheri_DSM20755","Cmarinum_DSM44953","Cpseudotuberculosis_ATCC19410","Crouxii_FRC0190","Ctestudinoris_DSM44614","Culcerans_NCTC12077","Culcerans_NCTC7910","C…	0.402175	0.312436	1.37342	0.402175	0.312436	1.37342	2050	2	1. 0.49649;2. 38;3. 112;4. 50;5. 41;6. 121;7. 43;8. 127;9. 88;10. A;11. GCT	1. 0.75958;2. 184;3. 550;4. 202;5. 187;6. 559;7. 199;8. 595;9. 424;10. I;11. ATT
ERS451417_00717	1717.62.peg.722	NA	NA	NA	1	12	Cargentoratense_DSM44202,"Cbelfantii_FRC0043","Cdiphtheriae_NCTC11397","Cepidermidicanis_DSM45586","Ckutscheri_DSM20755","Cmustelae_DSM45274","Cpseudotuberculosis_31","Crouxii_FRC0190","Csilvaticum_KL0182","Culcerans_NCTC12077","Culcerans_NCTC7910","Cvitaeruminis_DSM20294"	0.211603	0.211603	2.35349	0.211603	0.211603	2.35349	2050	3	1. 0.4207;2. 112;3. 334;4. 160;5. 140;6. 418;7. 188;8. 562;9. 232;10. A;11. GCT	1. 0.54628;2. 232;3. 694;4. 303;5. 262;6. 784;7. 312;8. 934;9. 541;10. A;11. GCC	1. 0.44366;2. 238;3. 712;4. 309;5. 268;6. 802;7. 318;8. 952;9. 559;10. T;11. ACG
ERS451417_00486	1717.62.peg.489	NA	NA	NA	1	6	Cbelfantii_FRC0043,"Cdiphtheriae_NCTC11397","Cpseudotuberculosis_ATCC19410","Crouxii_FRC0190","Csilvaticum_KL0182","Culcerans_NCTC7910"	0.205497	0.205497	2.45252	0.205497	0.205497	2.45252	2	1	1. 0.49584;2. 80;3. 238;4. 104;5. 87;6. 259;7. 87;8. 259;9. 208;10. D;11. GAT
ERS451417_00877	1717.62.peg.883	NA	NA	NA	1	39	Cargentoratense_DSM44202,"Catypicum_R2070","Caurimucosum_ATCC700975","Cbelfantii_FRC0043","Ccallunae_DSM20147","Ccamporealensis_DSM44610","Cdeserti_GIMN1010","Cdiphtheriae_NCTC11397","Cdoosanense_DSM45436","Cefficiens_YS314","Cepidermidicanis_DSM45586","Cfalsenii_DSM44353","Cglutamicum_ATCC13032","Cglycinophilum_AJ3170","Chalotolerans_YIM70093","Chumireducens_DSM45392","Cimitans_DSM44264","Cjeike…	0.159929	0.159929	1.74737	0.159929	0.159929	1.74737	3074	2	1. 0.49929;2. 193;3. 577;4. 223;5. 223;6. 667;7. 269;8. 805;9. 379;10. A;11. GCG	1. 0.47052;2. 296;3. 886;4. 337;5. 337;6. 1009;7. 391;8. 1171;9. 664;10. F;11. TTT
ERS451417_00528	1717.62.peg.531	NA	NA	NA	1	9	Cbelfantii_FRC0043,"Cdiphtheriae_NCTC11397","Ckutscheri_DSM20755","Cpseudotuberculosis_31","Cpseudotuberculosis_ATCC19410","Crouxii_FRC0190","Culcerans_NCTC12077","Culcerans_NCTC7910","Cvitaeruminis_DSM20294"	0.153704	0.153704	2.815	0.153704	0.153704	2.81491	2306	0
ERS451417_00384	1717.62.peg.384	NA	NA	NA	1	6	Cbelfantii_FRC0043,"Cdiphtheriae_NCTC11397","Clactis_RW25","Crouxii_FRC0190","Csilvaticum_KL0182","Culcerans_NCTC7910"	0.204646	0.204633	2.40174	0.263788	0.200058	2.41133	2050	4	1. 0.49495;2. 76;3. 226;4. 80;5. 78;6. 232;7. 78;8. 232;9. 220;10. D;11. GAC	1. 0.45076;2. 83;3. 247;4. 87;5. 85;6. 253;7. 85;8. 253;9. 241;10. A;11. GCT	1. 0.46457;2. 114;3. 340;4. 118;5. 116;6. 346;7. 116;8. 346;9. 334;10. G;11. GGT	1. 0.41983;2. 165;3. 493;4. 172;5. 167;6. 499;7. 179;8. 535;9. 421;10. A;11. GCT
ERS451417_00772	1717.62.peg.777	NA	NA	NA	1	11	Cbelfantii_FRC0043,"Cdiphtheriae_NCTC11397","Cefficiens_YS314","Cmustelae_DSM45274","Cpseudotuberculosis_31","Cpseudotuberculosis_ATCC19410","Crouxii_FRC0190","Csilvaticum_KL0182","Culcerans_NCTC12077","Culcerans_NCTC7910","Cvitaeruminis_DSM20294"	0.165163	0.165163	2.58455	0.165163	0.165163	2.58455	2	1	1. 0.40129;2. 181;3. 541;4. 237;5. 193;6. 577;7. 199;8. 595;9. 442;10. T;11. ACC
ERS451417_00829	1717.62.peg.833	NA	NA	NA	1	39	Cargentoratense_DSM44202,"Catypicum_R2070","Caurimucosum_ATCC700975","Cbelfantii_FRC0043","Ccallunae_DSM20147","Ccamporealensis_DSM44610","Cdeserti_GIMN1010","Cdiphtheriae_NCTC11397","Cdoosanense_DSM45436","Cefficiens_YS314","Cepidermidicanis_DSM45586","Cfalsenii_DSM44353","Cglutamicum_ATCC13032","Cglycinophilum_AJ3170","Chalotolerans_YIM70093","Chumireducens_DSM45392","Cimitans_DSM44264","Cjeike…	0.0871977	0.0871977	1.58477	0.0871977	0.0871977	1.58477	258	0
ERS451417_00136	1717.62.peg.135	NA	NA	NA	1	12	Cbelfantii_FRC0043,"Cdiphtheriae_NCTC11397","Chumireducens_DSM45392","Cmaris_DSM45190","Cmustelae_DSM45274","Cpseudotuberculosis_31","Cpseudotuberculosis_ATCC19410","Crouxii_FRC0190","Culcerans_NCTC12077","Culcerans_NCTC7910","Cuterequi_DSM45634","Cvitaeruminis_DSM20294"	0.12105	0.121041	2.12569	0.12105	0.12105	2.12568	2306	0
ERS451417_00414	1717.62.peg.414	NA	NA	NA	1	11	Catypicum_R2070,"Cbelfantii_FRC0043","Cdiphtheriae_NCTC11397","Cepidermidicanis_DSM45586","Ckutscheri_DSM20755","Cpseudotuberculosis_31","Cpseudotuberculosis_ATCC19410","Crouxii_FRC0190","Csilvaticum_KL0182","Culcerans_NCTC12077","Culcerans_NCTC7910"	0.120394	0.120394	2.34077	0.147362	0.121596	2.34546	2	2	1. 0.4911;2. 66;3. 196;4. 90;5. 89;6. 265;7. 113;8. 337;9. 31;10. E;11. GAA	1. 0.46407;2. 337;3. 1009;4. 377;5. 360;6. 1078;7. 384;8. 1150;9. 838;10. D;11. GAC
ERS451417_00332	1717.62.peg.334	NA	NA	NA	1	39	Cargentoratense_DSM44202,"Catypicum_R2070","Caurimucosum_ATCC700975","Cbelfantii_FRC0043","Ccallunae_DSM20147","Ccamporealensis_DSM44610","Cdeserti_GIMN1010","Cdiphtheriae_NCTC11397","Cdoosanense_DSM45436","Cefficiens_YS314","Cepidermidicanis_DSM45586","Cfalsenii_DSM44353","Cglutamicum_ATCC13032","Cglycinophilum_AJ3170","Chalotolerans_YIM70093","Chumireducens_DSM45392","Cimitans_DSM44264","Cjeike…	0.186547	0.186547	1.77437	0.186547	0.186547	1.77436	1026	1	1. 0.53514;2. 328;3. 982;4. 523;5. 523;6. 1567;7. 603;8. 1807;9. 907;10. N;11. AAT
ERS451417_00304	1717.62.peg.305	NA	NA	NA	1	22	Catypicum_R2070,"Caurimucosum_ATCC700975","Cbelfantii_FRC0043","Ccamporealensis_DSM44610","Cdiphtheriae_NCTC11397","Cepidermidicanis_DSM45586","Chumireducens_DSM45392","Cimitans_DSM44264","Cmarinum_DSM44953","Cmustelae_DSM45274","Cpseudotuberculosis_31","Cpseudotuberculosis_ATCC19410","CriegeliiPUDD83A45","Crouxii_FRC0190","Csilvaticum_KL0182","Csimulans_PES1","Csingulare_IBSB52218","Ctestudinori…	0.115778	0.115778	1.98664	0.115778	0.115778	1.98664	2	2	1. 0.64709;2. 138;3. 412;4. 140;5. 140;6. 418;7. 148;8. 442;9. 163;10. V;11. GTC	1. 0.41909;2. 316;3. 946;4. 318;5. 318;6. 952;7. 326;8. 976;9. 697;10. G;11. GGC
ERS451417_00856	1717.62.peg.861	NA	NA	NA	1	3	Cbelfantii_FRC0043,"Cdiphtheriae_NCTC11397","Crouxii_FRC0190"	0.218188	0.218188	3.61333	0.218188	0.218188	3.61333	130	2	1. 0.66575;2. 137;3. 409;4. 214;5. 137;6. 409;7. 137;8. 409;9. 409;10. R;11. CGC	1. 0.64689;2. 299;3. 895;4. 391;5. 299;6. 895;7. 299;8. 895;9. 895;10. M;11. ATG
ERS451417_00306	1717.62.peg.307	NA	NA	NA	1	36	Cargentoratense_DSM44202,"Catypicum_R2070","Caurimucosum_ATCC700975","Cbelfantii_FRC0043","Ccallunae_DSM20147","Ccamporealensis_DSM44610","Cdeserti_GIMN1010","Cdiphtheriae_NCTC11397","Cdoosanense_DSM45436","Cefficiens_YS314","Cepidermidicanis_DSM45586","Cfalsenii_DSM44353","Cglutamicum_ATCC13032","Cglycinophilum_AJ3170","Chalotolerans_YIM70093","Chumireducens_DSM45392","Cimitans_DSM44264","Cjeike…	0.160273	0.160273	1.3453	0.160273	0.160273	1.3453	2306	0
ERS451417_00069	1717.62.peg.65	NA	NA	NA	1	23	Cargentoratense_DSM44202,"Cbelfantii_FRC0043","Ccallunae_DSM20147","Cdiphtheriae_NCTC11397","Cdoosanense_DSM45436","Cefficiens_YS314","Cfalsenii_DSM44353","Chalotolerans_YIM70093","Chumireducens_DSM45392","Ckroppenstedtii_DSM44385","Ckutscheri_DSM20755","Clactis_RW25","Cmarinum_DSM44953","Cmaris_DSM45190","Cmustelae_DSM45274","Cpseudotuberculosis_31","Cpseudotuberculosis_ATCC19410","Crouxii_FRC01…	0.297792	0.297792	1.66965	0.297792	0.297792	1.66965	3330	0
ERS451417_00681	1717.62.peg.688	NA	NA	NA	1	39	Cargentoratense_DSM44202,"Catypicum_R2070","Caurimucosum_ATCC700975","Cbelfantii_FRC0043","Ccallunae_DSM20147","Ccamporealensis_DSM44610","Cdeserti_GIMN1010","Cdiphtheriae_NCTC11397","Cdoosanense_DSM45436","Cefficiens_YS314","Cepidermidicanis_DSM45586","Cfalsenii_DSM44353","Cglutamicum_ATCC13032","Cglycinophilum_AJ3170","Chalotolerans_YIM70093","Chumireducens_DSM45392","Cimitans_DSM44264","Cjeike…	0.137177	0.137177	1.71337	0.137177	0.137177	1.71338	258	0
ERS451417_00462	1717.62.peg.466	NA	NA	NA	1	39	Cargentoratense_DSM44202,"Catypicum_R2070","Caurimucosum_ATCC700975","Cbelfantii_FRC0043","Ccallunae_DSM20147","Ccamporealensis_DSM44610","Cdeserti_GIMN1010","Cdiphtheriae_NCTC11397","Cdoosanense_DSM45436","Cefficiens_YS314","Cepidermidicanis_DSM45586","Cfalsenii_DSM44353","Cglutamicum_ATCC13032","Cglycinophilum_AJ3170","Chalotolerans_YIM70093","Chumireducens_DSM45392","Cimitans_DSM44264","Cjeike…	1.17638	0.173803	1.33255	0.17387	0.17387	1.33348	256	0
ERS451417_00783	1717.62.peg.790	NA	NA	NA	1	36	Cargentoratense_DSM44202,"Catypicum_R2070","Caurimucosum_ATCC700975","Cbelfantii_FRC0043","Ccallunae_DSM20147","Ccamporealensis_DSM44610","Cdeserti_GIMN1010","Cdiphtheriae_NCTC11397","Cdoosanense_DSM45436","Cefficiens_YS314","Cepidermidicanis_DSM45586","Cfalsenii_DSM44353","Cglutamicum_ATCC13032","Cglycinophilum_AJ3170","Chalotolerans_YIM70093","Chumireducens_DSM45392","Cimitans_DSM44264","Cjeike…	0.188543	0.188543	1.09089	0.188543	0.188543	1.0909	258	0
ERS451417_01178	1717.62.peg.1187	NA	NA	NA	1	39	Cargentoratense_DSM44202,"Catypicum_R2070","Caurimucosum_ATCC700975","Cbelfantii_FRC0043","Ccallunae_DSM20147","Ccamporealensis_DSM44610","Cdeserti_GIMN1010","Cdiphtheriae_NCTC11397","Cdoosanense_DSM45436","Cefficiens_YS314","Cepidermidicanis_DSM45586","Cfalsenii_DSM44353","Cglutamicum_ATCC13032","Cglycinophilum_AJ3170","Chalotolerans_YIM70093","Chumireducens_DSM45392","Cimitans_DSM44264","Cjeike…	0.172291	0.172291	1.65517	0.172291	0.172291	1.65519	1026	1	1. 0.57144;2. 275;3. 823;4. 308;5. 308;6. 922;7. 397;8. 1189;9. 691;10. R;11. CGG
ERS451417_00659	1717.62.peg.663	NA	NA	NA	1	28	Catypicum_R2070,"Caurimucosum_ATCC700975","Cbelfantii_FRC0043","Ccallunae_DSM20147","Ccamporealensis_DSM44610","Cdeserti_GIMN1010","Cdiphtheriae_NCTC11397","Cdoosanense_DSM45436","Cepidermidicanis_DSM45586","Cglutamicum_ATCC13032","Chalotolerans_YIM70093","Chumireducens_DSM45392","Cimitans_DSM44264","Cmarinum_DSM44953","Cmaris_DSM45190","Cmustelae_DSM45274","Cpseudotuberculosis_31","Cpseudotuberc…	0.269452	0.269452	1.59205	0.269452	0.269452	1.59204	3330	0
ERS451417_00655	1717.62.peg.660	NA	NA	NA	1	39	Cargentoratense_DSM44202,"Catypicum_R2070","Caurimucosum_ATCC700975","Cbelfantii_FRC0043","Ccallunae_DSM20147","Ccamporealensis_DSM44610","Cdeserti_GIMN1010","Cdiphtheriae_NCTC11397","Cdoosanense_DSM45436","Cefficiens_YS314","Cepidermidicanis_DSM45586","Cfalsenii_DSM44353","Cglutamicum_ATCC13032","Cglycinophilum_AJ3170","Chalotolerans_YIM70093","Chumireducens_DSM45392","Cimitans_DSM44264","Cjeike…	0.130213	0.130213	1.8234	0.130213	0.130213	1.8234	258	0
ERS451417_01225	1717.62.peg.1233	NA	NA	NA	1	5	Cbelfantii_FRC0043,"Cdiphtheriae_NCTC11397","CriegeliiPUDD83A45","Crouxii_FRC0190","Csilvaticum_KL0182"	0.488362	0.269578	1.6089	0.269683	0.269585	1.60889	258	0
ERS451417_00567	1717.62.peg.570	NA	NA	NA	1	39	Cargentoratense_DSM44202,"Catypicum_R2070","Caurimucosum_ATCC700975","Cbelfantii_FRC0043","Ccallunae_DSM20147","Ccamporealensis_DSM44610","Cdeserti_GIMN1010","Cdiphtheriae_NCTC11397","Cdoosanense_DSM45436","Cefficiens_YS314","Cepidermidicanis_DSM45586","Cfalsenii_DSM44353","Cglutamicum_ATCC13032","Cglycinophilum_AJ3170","Chalotolerans_YIM70093","Chumireducens_DSM45392","Cimitans_DSM44264","Cjeike…	0.0844004	0.0844004	1.5447	0.0844004	0.0844004	1.5447	2	2	1. 0.57033;2. 62;3. 184;4. 82;5. 82;6. 244;7. 149;8. 445;9. 142;10. N;11. AAC	1. 0.60383;2. 226;3. 676;4. 246;5. 246;6. 736;7. 313;8. 937;9. 634;10. V;11. GTT
ERS451417_00251	1717.62.peg.246	NA	NA	NA	1	8	Cbelfantii_FRC0043,"Cdiphtheriae_NCTC11397","Cpseudotuberculosis_31","Cpseudotuberculosis_ATCC19410","Crouxii_FRC0190","Csilvaticum_KL0182","Culcerans_NCTC12077","Culcerans_NCTC7910"	0.241236	0.241236	3.75269	0.241236	0.241236	3.75269	2	1	1. 0.4484;2. 155;3. 463;4. 169;5. 155;6. 463;7. 155;8. 463;9. 463;10. I;11. ATC
ERS451417_00636	1717.62.peg.640	NA	NA	NA	1	38	Cargentoratense_DSM44202,"Catypicum_R2070","Caurimucosum_ATCC700975","Cbelfantii_FRC0043","Ccallunae_DSM20147","Ccamporealensis_DSM44610","Cdeserti_GIMN1010","Cdiphtheriae_NCTC11397","Cdoosanense_DSM45436","Cefficiens_YS314","Cepidermidicanis_DSM45586","Cglutamicum_ATCC13032","Cglycinophilum_AJ3170","Chalotolerans_YIM70093","Chumireducens_DSM45392","Cimitans_DSM44264","Cjeikeium_K41","Ckroppenste…	0.0456018	0.0456018	1.59034	0.0456018	0.0456018	1.59033	258	0
ERS451417_00718	1717.62.peg.723	NA	NA	NA	1	29	Cargentoratense_DSM44202,"Caurimucosum_ATCC700975","Cbelfantii_FRC0043","Ccallunae_DSM20147","Ccamporealensis_DSM44610","Cdeserti_GIMN1010","Cdiphtheriae_NCTC11397","Cdoosanense_DSM45436","Cefficiens_YS314","Cepidermidicanis_DSM45586","Cglutamicum_ATCC13032","Chalotolerans_YIM70093","Chumireducens_DSM45392","Cimitans_DSM44264","Cmarinum_DSM44953","Cmaris_DSM45190","Cmustelae_DSM45274","Cpseudotub…	0.283196	0.283196	1.72486	0.283196	0.283196	1.72486	2050	2	1. 0.46627;2. 54;3. 160;4. 55;5. 55;6. 163;7. 59;8. 175;9. 100;10. I;11. ATC	1. 0.45493;2. 73;3. 217;4. 74;5. 74;6. 220;7. 78;8. 232;9. 151;10. V;11. GTG
ERS451417_00295	1717.62.peg.296	NA	NA	NA	1	39	Cargentoratense_DSM44202,"Catypicum_R2070","Caurimucosum_ATCC700975","Cbelfantii_FRC0043","Ccallunae_DSM20147","Ccamporealensis_DSM44610","Cdeserti_GIMN1010","Cdiphtheriae_NCTC11397","Cdoosanense_DSM45436","Cefficiens_YS314","Cepidermidicanis_DSM45586","Cfalsenii_DSM44353","Cglutamicum_ATCC13032","Cglycinophilum_AJ3170","Chalotolerans_YIM70093","Chumireducens_DSM45392","Cimitans_DSM44264","Cjeike…	0.152666	0.152657	1.69241	0.152657	0.152657	1.69241	258	0
ERS451417_00481	1717.62.peg.484	NA	NA	NA	1	39	Cargentoratense_DSM44202,"Catypicum_R2070","Caurimucosum_ATCC700975","Cbelfantii_FRC0043","Ccallunae_DSM20147","Ccamporealensis_DSM44610","Cdeserti_GIMN1010","Cdiphtheriae_NCTC11397","Cdoosanense_DSM45436","Cefficiens_YS314","Cepidermidicanis_DSM45586","Cfalsenii_DSM44353","Cglutamicum_ATCC13032","Cglycinophilum_AJ3170","Chalotolerans_YIM70093","Chumireducens_DSM45392","Cimitans_DSM44264","Cjeike…	0.0879588	0.0879588	2.01101	0.0879588	0.0879588	2.01101	258	0
ERS451417_00549	1717.62.peg.553	NA	NA	NA	1	12	Cargentoratense_DSM44202,"Cbelfantii_FRC0043","Cdiphtheriae_NCTC11397","Clactis_RW25","Cmustelae_DSM45274","Cpseudotuberculosis_ATCC19410","Crouxii_FRC0190","Csilvaticum_KL0182","Csimulans_PES1","Culcerans_NCTC12077","Culcerans_NCTC7910","Curealyticum_DSM7109"	0.186329	0.186329	2.24183	0.186329	0.186329	2.24183	258	0
ERS451417_00553	1717.62.peg.557	NA	NA	NA	1	7	Cbelfantii_FRC0043,"Cdiphtheriae_NCTC11397","Cpseudotuberculosis_ATCC19410","Crouxii_FRC0190","Csilvaticum_KL0182","Culcerans_NCTC12077","Culcerans_NCTC7910"	0.108411	0.108411	3.07818	0.108411	0.108411	3.07819	2050	1	1. 0.51945;2. 140;3. 418;4. 144;5. 140;6. 418;7. 140;8. 418;9. 256;10. S;11. TCG
ERS451417_00475	1717.62.peg.478	NA	NA	NA	1	39	Cargentoratense_DSM44202,"Catypicum_R2070","Caurimucosum_ATCC700975","Cbelfantii_FRC0043","Ccallunae_DSM20147","Ccamporealensis_DSM44610","Cdeserti_GIMN1010","Cdiphtheriae_NCTC11397","Cdoosanense_DSM45436","Cefficiens_YS314","Cepidermidicanis_DSM45586","Cfalsenii_DSM44353","Cglutamicum_ATCC13032","Cglycinophilum_AJ3170","Chalotolerans_YIM70093","Chumireducens_DSM45392","Cimitans_DSM44264","Cjeike…	0.183932	0.183932	1.88134	0.183932	0.183932	1.88134	2306	0
ERS451417_00788	1717.62.peg.795	NA	NA	NA	1	20	Cbelfantii_FRC0043,"Ccallunae_DSM20147","Cdeserti_GIMN1010","Cdiphtheriae_NCTC11397","Cefficiens_YS314","Cepidermidicanis_DSM45586","Cfalsenii_DSM44353","Cglutamicum_ATCC13032","Cglycinophilum_AJ3170","Cjeikeium_K41","Ckroppenstedtii_DSM44385","Clactis_RW25","Cmustelae_DSM45274","Cpseudotuberculosis_31","Cpseudotuberculosis_ATCC19410","Crouxii_FRC0190","Csilvaticum_KL0182","Cterpenotabidum_Y11","…	0.127172	0.127172	2.44797	0.127172	0.127172	2.44797	3330	0
ERS451417_01566	1717.62.peg.1575	NA	NA	NA	1	39	Cargentoratense_DSM44202,"Catypicum_R2070","Caurimucosum_ATCC700975","Cbelfantii_FRC0043","Ccallunae_DSM20147","Ccamporealensis_DSM44610","Cdeserti_GIMN1010","Cdiphtheriae_NCTC11397","Cdoosanense_DSM45436","Cefficiens_YS314","Cepidermidicanis_DSM45586","Cfalsenii_DSM44353","Cglutamicum_ATCC13032","Cglycinophilum_AJ3170","Chalotolerans_YIM70093","Chumireducens_DSM45392","Cimitans_DSM44264","Cjeike…	0.140457	0.140457	2.54742	0.140457	0.140457	2.54742	258	0
ERS451417_00048	1717.62.peg.44	NA	NA	NA	1	35	Cargentoratense_DSM44202,"Catypicum_R2070","Caurimucosum_ATCC700975","Cbelfantii_FRC0043","Ccamporealensis_DSM44610","Cdeserti_GIMN1010","Cdiphtheriae_NCTC11397","Cdoosanense_DSM45436","Cefficiens_YS314","Cfalsenii_DSM44353","Cglycinophilum_AJ3170","Chalotolerans_YIM70093","Chumireducens_DSM45392","Cimitans_DSM44264","Cjeikeium_K41","Ckroppenstedtii_DSM44385","Clactis_RW25","Cmarinum_DSM44953","C…	0.114504	0.114495	1.91749	0.114495	0.114495	1.9175	3330	0
ERS451417_00960	1717.62.peg.967	NA	NA	NA	1	39	Cargentoratense_DSM44202,"Catypicum_R2070","Caurimucosum_ATCC700975","Cbelfantii_FRC0043","Ccallunae_DSM20147","Ccamporealensis_DSM44610","Cdeserti_GIMN1010","Cdiphtheriae_NCTC11397","Cdoosanense_DSM45436","Cefficiens_YS314","Cepidermidicanis_DSM45586","Cfalsenii_DSM44353","Cglutamicum_ATCC13032","Cglycinophilum_AJ3170","Chalotolerans_YIM70093","Chumireducens_DSM45392","Cimitans_DSM44264","Cjeike…	0.156421	0.156421	1.70632	0.156421	0.156421	1.70632	258	0
ERS451417_00759	1717.62.peg.764	NA	NA	NA	1	36	Cargentoratense_DSM44202,"Caurimucosum_ATCC700975","Cbelfantii_FRC0043","Ccallunae_DSM20147","Ccamporealensis_DSM44610","Cdeserti_GIMN1010","Cdiphtheriae_NCTC11397","Cdoosanense_DSM45436","Cefficiens_YS314","Cepidermidicanis_DSM45586","Cfalsenii_DSM44353","Cglutamicum_ATCC13032","Cglycinophilum_AJ3170","Chalotolerans_YIM70093","Chumireducens_DSM45392","Cimitans_DSM44264","Cjeikeium_K41","Ckutsche…	1	0.142038	1.78661	0.142309	0.142309	1.78418	3328	0
ERS451417_00189	1717.62.peg.185	NA	NA	NA	1	22	Catypicum_R2070,"Caurimucosum_ATCC700975","Cbelfantii_FRC0043","Ccamporealensis_DSM44610","Cdiphtheriae_NCTC11397","Cepidermidicanis_DSM45586","Cfalsenii_DSM44353","Ckroppenstedtii_DSM44385","Ckutscheri_DSM20755","Clactis_RW25","Cmustelae_DSM45274","Cpseudotuberculosis_31","Cpseudotuberculosis_ATCC19410","CriegeliiPUDD83A45","Crouxii_FRC0190","Csilvaticum_KL0182","Csimulans_PES1","Ctestudinoris_D…	0.390592	0.390592	2.2253	0.390592	0.390592	2.2253	2306	0
ERS451417_00542	1717.62.peg.546	NA	NA	NA	1	38	Cargentoratense_DSM44202,"Catypicum_R2070","Caurimucosum_ATCC700975","Cbelfantii_FRC0043","Ccallunae_DSM20147","Ccamporealensis_DSM44610","Cdeserti_GIMN1010","Cdiphtheriae_NCTC11397","Cdoosanense_DSM45436","Cefficiens_YS314","Cepidermidicanis_DSM45586","Cfalsenii_DSM44353","Cglutamicum_ATCC13032","Chalotolerans_YIM70093","Chumireducens_DSM45392","Cimitans_DSM44264","Cjeikeium_K41","Ckroppenstedti…	0.446116	0.302881	1.60001	0.446125	0.302881	1.60001	3074	1	1. 0.79514;2. 214;3. 640;4. 278;5. 278;6. 832;7. 339;8. 1015;9. 484;10. V;11. GTA
ERS451417_00480	1717.62.peg.483	NA	NA	NA	1	39	Cargentoratense_DSM44202,"Catypicum_R2070","Caurimucosum_ATCC700975","Cbelfantii_FRC0043","Ccallunae_DSM20147","Ccamporealensis_DSM44610","Cdeserti_GIMN1010","Cdiphtheriae_NCTC11397","Cdoosanense_DSM45436","Cefficiens_YS314","Cepidermidicanis_DSM45586","Cfalsenii_DSM44353","Cglutamicum_ATCC13032","Cglycinophilum_AJ3170","Chalotolerans_YIM70093","Chumireducens_DSM45392","Cimitans_DSM44264","Cjeike…	0.157516	0.157516	2.2194	0.157516	0.157516	2.2194	258	0
ERS451417_01253	1717.62.peg.1261	NA	NA	NA	1	31	Catypicum_R2070,"Caurimucosum_ATCC700975","Cbelfantii_FRC0043","Ccamporealensis_DSM44610","Cdiphtheriae_NCTC11397","Cdoosanense_DSM45436","Cepidermidicanis_DSM45586","Cfalsenii_DSM44353","Chalotolerans_YIM70093","Chumireducens_DSM45392","Cimitans_DSM44264","Cjeikeium_K41","Ckroppenstedtii_DSM44385","Ckutscheri_DSM20755","Cmarinum_DSM44953","Cmaris_DSM45190","Cmustelae_DSM45274","Cpseudotuberculos…	0.205432	0.205432	1.65521	0.205432	0.205432	1.65521	2	1	1. 0.58103;2. 284;3. 850;4. 329;5. 329;6. 985;7. 428;8. 1282;9. 787;10. T;11. ACC
ERS451417_00303	1717.62.peg.304	NA	NA	NA	1	22	Catypicum_R2070,"Caurimucosum_ATCC700975","Cbelfantii_FRC0043","Ccamporealensis_DSM44610","Cdiphtheriae_NCTC11397","Cepidermidicanis_DSM45586","Chumireducens_DSM45392","Cimitans_DSM44264","Cmarinum_DSM44953","Cmustelae_DSM45274","Cpseudotuberculosis_31","Cpseudotuberculosis_ATCC19410","CriegeliiPUDD83A45","Crouxii_FRC0190","Csilvaticum_KL0182","Csimulans_PES1","Csingulare_IBSB52218","Ctestudinori…	0.525832	0.134555	1.09414	0.24335	0.134555	1.09414	258	0
ERS451417_00217	1717.62.peg.214	NA	NA	NA	1	11	Cbelfantii_FRC0043,"Cdiphtheriae_NCTC11397","Ckutscheri_DSM20755","Cmustelae_DSM45274","Cpseudotuberculosis_31","Cpseudotuberculosis_ATCC19410","Crouxii_FRC0190","Csilvaticum_KL0182","Culcerans_NCTC12077","Culcerans_NCTC7910","Cvitaeruminis_DSM20294"	0.148503	0.148503	2.12641	0.148503	0.148503	2.1264	258	0
ERS451417_00505	1717.62.peg.509	NA	NA	NA	1	8	Cbelfantii_FRC0043,"Cdiphtheriae_NCTC11397","Cpseudotuberculosis_31","Cpseudotuberculosis_ATCC19410","Crouxii_FRC0190","Csilvaticum_KL0182","Culcerans_NCTC12077","Culcerans_NCTC7910"	0.10515	0.0641468	3.74092	0.105565	0.0640218	3.74242	2	4	1. 0.53078;2. 65;3. 193;4. 74;5. 65;6. 193;7. 65;8. 193;9. 193;10. S;11. TCC	1. 0.44589;2. 83;3. 247;4. 93;5. 83;6. 247;7. 83;8. 247;9. 247;10. K;11. AAG	1. 0.59341;2. 91;3. 271;4. 104;5. 91;6. 271;7. 91;8. 271;9. 271;10. A;11. GCA	1. 0.43363;2. 131;3. 391;4. 146;5. 131;6. 391;7. 131;8. 391;9. 391;10. T;11. ACC
ERS451417_00465	1717.62.peg.469	NA	NA	NA	1	5	Cbelfantii_FRC0043,"Cdiphtheriae_NCTC11397","Ckutscheri_DSM20755","Crouxii_FRC0190","Cterpenotabidum_Y11"	0.190898	0.190898	2.3739	0.190898	0.190898	2.37389	2050	2	1. 0.78991;2. 468;3. 1402;4. 613;5. 480;6. 1438;7. 515;8. 1543;9. 1183;10. R;11. CGG	1. 0.72929;2. 472;3. 1414;4. 617;5. 484;6. 1450;7. 519;8. 1555;9. 1195;10. S;11. TCT
ERS451417_01160	1717.62.peg.1171	NA	NA	NA	1	37	Cargentoratense_DSM44202,"Caurimucosum_ATCC700975","Cbelfantii_FRC0043","Ccallunae_DSM20147","Ccamporealensis_DSM44610","Cdeserti_GIMN1010","Cdiphtheriae_NCTC11397","Cdoosanense_DSM45436","Cefficiens_YS314","Cepidermidicanis_DSM45586","Cfalsenii_DSM44353","Cglutamicum_ATCC13032","Cglycinophilum_AJ3170","Chalotolerans_YIM70093","Chumireducens_DSM45392","Cimitans_DSM44264","Cjeikeium_K41","Ckroppen…	0.186383	0.186383	1.6476	0.186383	0.186383	1.64759	3074	2	1. 0.49125;2. 73;3. 217;4. 100;5. 100;6. 298;7. 121;8. 361;9. 184;10. E;11. GAG	1. 0.41255;2. 337;3. 1009;4. 395;5. 395;6. 1183;7. 449;8. 1345;9. 757;10. G;11. GGG
ERS451417_00124	1717.62.peg.122	NA	NA	NA	1	14	Cbelfantii_FRC0043,"Ccallunae_DSM20147","Cdiphtheriae_NCTC11397","Cdoosanense_DSM45436","Cefficiens_YS314","Ckroppenstedtii_DSM44385","Ckutscheri_DSM20755","Cpseudotuberculosis_31","Cpseudotuberculosis_ATCC19410","Crouxii_FRC0190","Csilvaticum_KL0182","Culcerans_NCTC12077","Culcerans_NCTC7910","Cvitaeruminis_DSM20294"	1	0.134867	2.15914	1	0.134867	2.15914	3072	3	1. 0.84911;2. 85;3. 253;4. 131;5. 125;6. 373;7. 132;8. 394;9. 136;10. E;11. GAA	1. 0.89705;2. 218;3. 652;4. 276;5. 267;6. 799;7. 275;8. 823;9. 445;10. L;11. TTG	1. 0.63711;2. 267;3. 799;4. 333;5. 320;6. 958;7. 328;8. 982;9. 580;10. V;11. GTC
ERS451417_00979	1717.62.peg.989	NA	NA	NA	1	36	Cargentoratense_DSM44202,"Catypicum_R2070","Caurimucosum_ATCC700975","Cbelfantii_FRC0043","Ccallunae_DSM20147","Ccamporealensis_DSM44610","Cdeserti_GIMN1010","Cdiphtheriae_NCTC11397","Cdoosanense_DSM45436","Cefficiens_YS314","Cepidermidicanis_DSM45586","Cfalsenii_DSM44353","Cglutamicum_ATCC13032","Cglycinophilum_AJ3170","Chalotolerans_YIM70093","Chumireducens_DSM45392","Cjeikeium_K41","Ckroppenst…	0.168962	0.168962	1.53882	0.168962	0.168962	1.53882	2306	0
ERS451417_00499	1717.62.peg.503	NA	NA	NA	1	3	Cbelfantii_FRC0043,"Cdiphtheriae_NCTC11397","Crouxii_FRC0190"	0.323983	0.323983	5.4398	0.323983	0.323983	5.4398	130	1	1. 0.59712;2. 272;3. 814;4. 305;5. 283;6. 847;7. 283;8. 847;9. 682;10. T;11. ACA
ERS451417_00283	1717.62.peg.284	NA	NA	NA	1	3	Cbelfantii_FRC0043,"Cdiphtheriae_NCTC11397","Crouxii_FRC0190"	0.252711	0.252711	4.19171	0.252711	0.252711	4.19171	130	1	1. 0.41693;2. 9;3. 25;4. 52;5. 36;6. 106;7. 36;8. 106;9. 25;10. A;11. GCC
ERS451417_00230	1717.62.peg.226	NA	NA	NA	1	38	Cargentoratense_DSM44202,"Catypicum_R2070","Caurimucosum_ATCC700975","Cbelfantii_FRC0043","Ccallunae_DSM20147","Ccamporealensis_DSM44610","Cdeserti_GIMN1010","Cdiphtheriae_NCTC11397","Cdoosanense_DSM45436","Cefficiens_YS314","Cepidermidicanis_DSM45586","Cfalsenii_DSM44353","Cglutamicum_ATCC13032","Cglycinophilum_AJ3170","Chalotolerans_YIM70093","Chumireducens_DSM45392","Cimitans_DSM44264","Cjeike…	0.184775	0.184775	1.97092	0.184775	0.184775	1.97092	3074	1	1. 0.56208;2. 99;3. 295;4. 129;5. 129;6. 385;7. 135;8. 403;9. 106;10. I;11. ATT
ERS451417_00708	1717.62.peg.713	NA	NA	NA	1	39	Cargentoratense_DSM44202,"Catypicum_R2070","Caurimucosum_ATCC700975","Cbelfantii_FRC0043","Ccallunae_DSM20147","Ccamporealensis_DSM44610","Cdeserti_GIMN1010","Cdiphtheriae_NCTC11397","Cdoosanense_DSM45436","Cefficiens_YS314","Cepidermidicanis_DSM45586","Cfalsenii_DSM44353","Cglutamicum_ATCC13032","Cglycinophilum_AJ3170","Chalotolerans_YIM70093","Chumireducens_DSM45392","Cimitans_DSM44264","Cjeike…	0.16098	0.16098	1.88953	0.16098	0.16098	1.88953	258	0
ERS451417_00620	1717.62.peg.624	NA	NA	NA	1	32	Cargentoratense_DSM44202,"Catypicum_R2070","Cbelfantii_FRC0043","Ccallunae_DSM20147","Ccamporealensis_DSM44610","Cdeserti_GIMN1010","Cdiphtheriae_NCTC11397","Cdoosanense_DSM45436","Cepidermidicanis_DSM45586","Cfalsenii_DSM44353","Cglutamicum_ATCC13032","Chalotolerans_YIM70093","Chumireducens_DSM45392","Cimitans_DSM44264","Cjeikeium_K41","Ckroppenstedtii_DSM44385","Ckutscheri_DSM20755","Clactis_RW…	0.231089	0.231089	1.87466	0.231089	0.231089	1.87465	3330	0
ERS451417_01042	1717.62.peg.1052	NA	NA	NA	1	39	Cargentoratense_DSM44202,"Catypicum_R2070","Caurimucosum_ATCC700975","Cbelfantii_FRC0043","Ccallunae_DSM20147","Ccamporealensis_DSM44610","Cdeserti_GIMN1010","Cdiphtheriae_NCTC11397","Cdoosanense_DSM45436","Cefficiens_YS314","Cepidermidicanis_DSM45586","Cfalsenii_DSM44353","Cglutamicum_ATCC13032","Cglycinophilum_AJ3170","Chalotolerans_YIM70093","Chumireducens_DSM45392","Cimitans_DSM44264","Cjeike…	0.130637	0.130637	1.91179	0.130637	0.130637	1.91179	2	1	1. 0.65962;2. 321;3. 961;4. 347;5. 347;6. 1039;7. 413;8. 1237;9. 913;10. P;11. CCA
ERS451417_00768	1717.62.peg.773	NA	NA	NA	1	39	Cargentoratense_DSM44202,"Catypicum_R2070","Caurimucosum_ATCC700975","Cbelfantii_FRC0043","Ccallunae_DSM20147","Ccamporealensis_DSM44610","Cdeserti_GIMN1010","Cdiphtheriae_NCTC11397","Cdoosanense_DSM45436","Cefficiens_YS314","Cepidermidicanis_DSM45586","Cfalsenii_DSM44353","Cglutamicum_ATCC13032","Cglycinophilum_AJ3170","Chalotolerans_YIM70093","Chumireducens_DSM45392","Cimitans_DSM44264","Cjeike…	0.0685201	0.0685201	2.05437	0.0685201	0.0685201	2.05437	1282	0
ERS451417_00070	1717.62.peg.66	NA	NA	NA	1	10	Cbelfantii_FRC0043,"Cdiphtheriae_NCTC11397","Cepidermidicanis_DSM45586","Ckutscheri_DSM20755","Cpseudotuberculosis_31","Cpseudotuberculosis_ATCC19410","Crouxii_FRC0190","Csilvaticum_KL0182","Culcerans_NCTC12077","Culcerans_NCTC7910"	0.357451	0.357451	4.79209	0.357451	0.357451	4.79209	258	0
ERS451417_01009	1717.62.peg.1020	NA	NA	NA	1	39	Cargentoratense_DSM44202,"Catypicum_R2070","Caurimucosum_ATCC700975","Cbelfantii_FRC0043","Ccallunae_DSM20147","Ccamporealensis_DSM44610","Cdeserti_GIMN1010","Cdiphtheriae_NCTC11397","Cdoosanense_DSM45436","Cefficiens_YS314","Cepidermidicanis_DSM45586","Cfalsenii_DSM44353","Cglutamicum_ATCC13032","Cglycinophilum_AJ3170","Chalotolerans_YIM70093","Chumireducens_DSM45392","Cimitans_DSM44264","Cjeike…	0.113846	0.113809	1.44042	0.113819	0.113809	1.44041	258	0
ERS451417_00087	1717.62.peg.84	NA	NA	NA	1	24	Caurimucosum_ATCC700975,"Cbelfantii_FRC0043","Ccallunae_DSM20147","Cdiphtheriae_NCTC11397","Cefficiens_YS314","Cepidermidicanis_DSM45586","Cfalsenii_DSM44353","Cglutamicum_ATCC13032","Clactis_RW25","Cmarinum_DSM44953","Cmustelae_DSM45274","Cpseudotuberculosis_31","Cpseudotuberculosis_ATCC19410","Crouxii_FRC0190","Csilvaticum_KL0182","Csimulans_PES1","Csingulare_IBSB52218","Cterpenotabidum_Y11","C…	0.262526	0.262526	2.09864	0.262526	0.262526	2.09865	2306	0
ERS451417_00038	1717.62.peg.34	NA	NA	NA	1	31	Cargentoratense_DSM44202,"Caurimucosum_ATCC700975","Cbelfantii_FRC0043","Ccallunae_DSM20147","Cdeserti_GIMN1010","Cdiphtheriae_NCTC11397","Cefficiens_YS314","Cepidermidicanis_DSM45586","Cfalsenii_DSM44353","Cglutamicum_ATCC13032","Cglycinophilum_AJ3170","Chalotolerans_YIM70093","Chumireducens_DSM45392","Cimitans_DSM44264","Cjeikeium_K41","Ckroppenstedtii_DSM44385","Clactis_RW25","Cmarinum_DSM4495…	0.966633	0.189561	2.21132	0.34922	0.189561	2.21131	1280	0
ERS451417_00704	1717.62.peg.709	NA	NA	NA	1	38	Cargentoratense_DSM44202,"Catypicum_R2070","Caurimucosum_ATCC700975","Cbelfantii_FRC0043","Ccallunae_DSM20147","Ccamporealensis_DSM44610","Cdeserti_GIMN1010","Cdiphtheriae_NCTC11397","Cdoosanense_DSM45436","Cefficiens_YS314","Cepidermidicanis_DSM45586","Cfalsenii_DSM44353","Cglutamicum_ATCC13032","Cglycinophilum_AJ3170","Chalotolerans_YIM70093","Chumireducens_DSM45392","Cimitans_DSM44264","Cjeike…	0.136388	0.120428	2.00393	0.120475	0.120428	2.00393	1282	0
ERS451417_00483	1717.62.peg.486	NA	NA	NA	1	39	Cargentoratense_DSM44202,"Catypicum_R2070","Caurimucosum_ATCC700975","Cbelfantii_FRC0043","Ccallunae_DSM20147","Ccamporealensis_DSM44610","Cdeserti_GIMN1010","Cdiphtheriae_NCTC11397","Cdoosanense_DSM45436","Cefficiens_YS314","Cepidermidicanis_DSM45586","Cfalsenii_DSM44353","Cglutamicum_ATCC13032","Cglycinophilum_AJ3170","Chalotolerans_YIM70093","Chumireducens_DSM45392","Cimitans_DSM44264","Cjeike…	0.094854	0.094854	1.99015	0.094854	0.094854	1.99016	258	0
ERS451417_00959	1717.62.peg.966	NA	NA	NA	1	39	Cargentoratense_DSM44202,"Catypicum_R2070","Caurimucosum_ATCC700975","Cbelfantii_FRC0043","Ccallunae_DSM20147","Ccamporealensis_DSM44610","Cdeserti_GIMN1010","Cdiphtheriae_NCTC11397","Cdoosanense_DSM45436","Cefficiens_YS314","Cepidermidicanis_DSM45586","Cfalsenii_DSM44353","Cglutamicum_ATCC13032","Cglycinophilum_AJ3170","Chalotolerans_YIM70093","Chumireducens_DSM45392","Cimitans_DSM44264","Cjeike…	0.318538	0.318538	1.71846	0.318538	0.318538	1.71846	258	0
ERS451417_00883	1717.62.peg.889	NA	NA	NA	1	38	Cargentoratense_DSM44202,"Catypicum_R2070","Caurimucosum_ATCC700975","Cbelfantii_FRC0043","Ccallunae_DSM20147","Ccamporealensis_DSM44610","Cdeserti_GIMN1010","Cdiphtheriae_NCTC11397","Cdoosanense_DSM45436","Cefficiens_YS314","Cepidermidicanis_DSM45586","Cfalsenii_DSM44353","Cglutamicum_ATCC13032","Cglycinophilum_AJ3170","Chalotolerans_YIM70093","Chumireducens_DSM45392","Cimitans_DSM44264","Cjeike…	0.163223	0.163223	1.67796	0.163223	0.163223	1.67793	3074	1	1. 0.40279;2. 94;3. 280;4. 126;5. 126;6. 376;7. 247;8. 739;9. 217;10. L;11. CTC
ERS451417_00406	1717.62.peg.406	NA	NA	NA	1	3	Cbelfantii_FRC0043,"Cdiphtheriae_NCTC11397","Crouxii_FRC0190"	0.107871	0.107871	2.93236	0.107871	0.107871	2.93236	2178	1	1. 0.41748;2. 366;3. 1096;4. 476;5. 398;6. 1192;7. 398;8. 1192;9. 1096;10. T;11. ACT
ERS451417_00463	1717.62.peg.467	NA	NA	NA	1	20	Catypicum_R2070,"Caurimucosum_ATCC700975","Cbelfantii_FRC0043","Ccamporealensis_DSM44610","Cdiphtheriae_NCTC11397","Cdoosanense_DSM45436","Cfalsenii_DSM44353","Chalotolerans_YIM70093","Chumireducens_DSM45392","Cimitans_DSM44264","Cmaris_DSM45190","Cmustelae_DSM45274","Cpseudotuberculosis_ATCC19410","Crouxii_FRC0190","Csilvaticum_KL0182","Csimulans_PES1","Csingulare_IBSB52218","Culcerans_NCTC12077…	0.210655	0.210655	1.79795	0.210655	0.210655	1.79795	2	1	1. 0.47151;2. 161;3. 481;4. 179;5. 173;6. 517;7. 178;8. 532;9. 424;10. V;11. GTA
ERS451417_00453	1717.62.peg.457	NA	NA	NA	1	17	Cbelfantii_FRC0043,"Ccallunae_DSM20147","Ccamporealensis_DSM44610","Cdeserti_GIMN1010","Cdiphtheriae_NCTC11397","Cepidermidicanis_DSM45586","Cglutamicum_ATCC13032","Ckroppenstedtii_DSM44385","Ckutscheri_DSM20755","Cpseudotuberculosis_31","Cpseudotuberculosis_ATCC19410","Crouxii_FRC0190","Csilvaticum_KL0182","Ctestudinoris_DSM44614","Culcerans_NCTC12077","Culcerans_NCTC7910","Cuterequi_DSM45634"	0.165536	0.165536	2.16577	0.165536	0.165536	2.16577	2050	2	1. 0.50263;2. 160;3. 478;4. 175;5. 173;6. 517;7. 174;8. 520;9. 457;10. H;11. CAC	1. 0.43839;2. 170;3. 508;4. 185;5. 183;6. 547;7. 184;8. 550;9. 487;10. E;11. GAG
ERS451417_00063	1717.62.peg.59	NA	NA	NA	1	12	Cbelfantii_FRC0043,"Cdiphtheriae_NCTC11397","Cefficiens_YS314","Cimitans_DSM44264","Crouxii_FRC0190","Csimulans_PES1","Csingulare_IBSB52218","Ctestudinoris_DSM44614","Culcerans_NCTC12077","Culcerans_NCTC7910","Cureicelerivorans_IMMIBRIV2301","Cuterequi_DSM45634"	0.208168	0.195793	2.62067	0.207244	0.195793	2.62066	3330	0
ERS451417_00836	1717.62.peg.841	NA	NA	NA	1	39	Cargentoratense_DSM44202,"Catypicum_R2070","Caurimucosum_ATCC700975","Cbelfantii_FRC0043","Ccallunae_DSM20147","Ccamporealensis_DSM44610","Cdeserti_GIMN1010","Cdiphtheriae_NCTC11397","Cdoosanense_DSM45436","Cefficiens_YS314","Cepidermidicanis_DSM45586","Cfalsenii_DSM44353","Cglutamicum_ATCC13032","Cglycinophilum_AJ3170","Chalotolerans_YIM70093","Chumireducens_DSM45392","Cimitans_DSM44264","Cjeike…	0.0926537	0.0926537	1.8691	0.0926537	0.0926537	1.8691	2	1	1. 0.47579;2. 376;3. 1126;4. 400;5. 400;6. 1198;7. 440;8. 1318;9. 1060;10. T;11. ACC
ERS451417_00225	1717.62.peg.221	NA	NA	NA	1	32	Cargentoratense_DSM44202,"Catypicum_R2070","Caurimucosum_ATCC700975","Cbelfantii_FRC0043","Ccallunae_DSM20147","Ccamporealensis_DSM44610","Cdeserti_GIMN1010","Cdiphtheriae_NCTC11397","Cefficiens_YS314","Cepidermidicanis_DSM45586","Cglutamicum_ATCC13032","Chalotolerans_YIM70093","Chumireducens_DSM45392","Cimitans_DSM44264","Ckroppenstedtii_DSM44385","Ckutscheri_DSM20755","Clactis_RW25","Cmarinum_D…	0.160702	0.160702	1.74336	0.160702	0.160702	1.74336	1282	0
ERS451417_00412	1717.62.peg.412	NA	NA	NA	1	13	Catypicum_R2070,"Cbelfantii_FRC0043","Ccamporealensis_DSM44610","Cdiphtheriae_NCTC11397","Cepidermidicanis_DSM45586","Ckutscheri_DSM20755","Cpseudotuberculosis_31","Cpseudotuberculosis_ATCC19410","Crouxii_FRC0190","Csilvaticum_KL0182","Csimulans_PES1","Culcerans_NCTC12077","Culcerans_NCTC7910"	0.18072	0.18072	2.50644	0.18072	0.18072	2.50643	2306	0
ERS451417_00005	1717.62.peg.6	NA	NA	NA	1	39	Cargentoratense_DSM44202,"Catypicum_R2070","Caurimucosum_ATCC700975","Cbelfantii_FRC0043","Ccallunae_DSM20147","Ccamporealensis_DSM44610","Cdeserti_GIMN1010","Cdiphtheriae_NCTC11397","Cdoosanense_DSM45436","Cefficiens_YS314","Cepidermidicanis_DSM45586","Cfalsenii_DSM44353","Cglutamicum_ATCC13032","Cglycinophilum_AJ3170","Chalotolerans_YIM70093","Chumireducens_DSM45392","Cimitans_DSM44264","Cjeike…	0.122071	0.122071	1.93327	0.122071	0.122071	1.93327	258	0
ERS451417_00461	1717.62.peg.465	NA	NA	NA	1	39	Cargentoratense_DSM44202,"Catypicum_R2070","Caurimucosum_ATCC700975","Cbelfantii_FRC0043","Ccallunae_DSM20147","Ccamporealensis_DSM44610","Cdeserti_GIMN1010","Cdiphtheriae_NCTC11397","Cdoosanense_DSM45436","Cefficiens_YS314","Cepidermidicanis_DSM45586","Cfalsenii_DSM44353","Cglutamicum_ATCC13032","Cglycinophilum_AJ3170","Chalotolerans_YIM70093","Chumireducens_DSM45392","Cimitans_DSM44264","Cjeike…	0.432082	0.432082	1.73657	0.432082	0.432082	1.73657	258	0
ERS451417_01047	1717.62.peg.1057	NA	NA	NA	1	22	Cbelfantii_FRC0043,"Ccallunae_DSM20147","Ccamporealensis_DSM44610","Cdeserti_GIMN1010","Cdiphtheriae_NCTC11397","Cefficiens_YS314","Cepidermidicanis_DSM45586","Chalotolerans_YIM70093","Chumireducens_DSM45392","Cimitans_DSM44264","Cmarinum_DSM44953","Cmaris_DSM45190","Cmustelae_DSM45274","Cpseudotuberculosis_31","Cpseudotuberculosis_ATCC19410","Crouxii_FRC0190","Csilvaticum_KL0182","Csingulare_IBS…	1.50467	0.3305	1.67722	0.33177	0.33177	1.67116	3328	0
ERS451417_00964	1717.62.peg.971	NA	NA	NA	1	8	Cbelfantii_FRC0043,"Cdiphtheriae_NCTC11397","Cpseudotuberculosis_31","Cpseudotuberculosis_ATCC19410","Crouxii_FRC0190","Csilvaticum_KL0182","Culcerans_NCTC12077","Culcerans_NCTC7910"	0.04377	0.04377	2.54766	0.0480667	0.04336	2.54899	2	1	1. 0.41713;2. 102;3. 304;4. 114;5. 111;6. 331;7. 111;8. 331;9. 298;10. T;11. ACG
ERS451417_00387	1717.62.peg.387	NA	NA	NA	1	11	Cbelfantii_FRC0043,"Cdiphtheriae_NCTC11397","Cepidermidicanis_DSM45586","Cmarinum_DSM44953","Cpseudotuberculosis_31","Cpseudotuberculosis_ATCC19410","Crouxii_FRC0190","Csilvaticum_KL0182","Ctestudinoris_DSM44614","Culcerans_NCTC12077","Culcerans_NCTC7910"	0.284245	0.284245	1.72997	0.284245	0.284245	1.72998	1282	0
ERS451417_00497	1717.62.peg.501	NA	NA	NA	1	39	Cargentoratense_DSM44202,"Catypicum_R2070","Caurimucosum_ATCC700975","Cbelfantii_FRC0043","Ccallunae_DSM20147","Ccamporealensis_DSM44610","Cdeserti_GIMN1010","Cdiphtheriae_NCTC11397","Cdoosanense_DSM45436","Cefficiens_YS314","Cepidermidicanis_DSM45586","Cfalsenii_DSM44353","Cglutamicum_ATCC13032","Cglycinophilum_AJ3170","Chalotolerans_YIM70093","Chumireducens_DSM45392","Cimitans_DSM44264","Cjeike…	0.19707	0.19707	1.72695	0.19707	0.19707	1.72695	258	0
ERS451417_00598	1717.62.peg.602	NA	NA	NA	1	12	Cdiphtheriae_NCTC11397,"Chalotolerans_YIM70093","Chumireducens_DSM45392","Cmarinum_DSM44953","Cpseudotuberculosis_31","Cpseudotuberculosis_ATCC19410","Crouxii_FRC0190","Csilvaticum_KL0182","Csimulans_PES1","Ctestudinoris_DSM44614","Culcerans_NCTC12077","Culcerans_NCTC7910"	0.206389	0.206389	2.77373	0.206389	0.206389	2.77372	2050	1	1. 0.48156;2. 16;3. 46;4. 68;5. 17;6. 49;7. 16;8. 46;9. 13;10. V;11. GTC
ERS451417_00388	1717.62.peg.388	NA	NA	NA	1	18	Cbelfantii_FRC0043,"Cdiphtheriae_NCTC11397","Cepidermidicanis_DSM45586","Chumireducens_DSM45392","Ckutscheri_DSM20755","Clactis_RW25","Cmarinum_DSM44953","Cmustelae_DSM45274","Cpseudotuberculosis_31","Cpseudotuberculosis_ATCC19410","Crouxii_FRC0190","Csilvaticum_KL0182","Csimulans_PES1","Ctestudinoris_DSM44614","Culcerans_NCTC12077","Culcerans_NCTC7910","Curealyticum_DSM7109","Cvitaeruminis_DSM20…	0.141457	0.141457	1.78785	0.141457	0.141457	1.78785	2	1	1. 0.48154;2. 222;3. 664;4. 346;5. 296;6. 886;7. 353;8. 1057;9. 628;10. M;11. ATG
ERS451417_00405	1717.62.peg.405	NA	NA	NA	1	39	Cargentoratense_DSM44202,"Catypicum_R2070","Caurimucosum_ATCC700975","Cbelfantii_FRC0043","Ccallunae_DSM20147","Ccamporealensis_DSM44610","Cdeserti_GIMN1010","Cdiphtheriae_NCTC11397","Cdoosanense_DSM45436","Cefficiens_YS314","Cepidermidicanis_DSM45586","Cfalsenii_DSM44353","Cglutamicum_ATCC13032","Cglycinophilum_AJ3170","Chalotolerans_YIM70093","Chumireducens_DSM45392","Cimitans_DSM44264","Cjeike…	0.453152	0.156667	2.80993	0.259122	0.156667	2.80993	258	0
ERS451417_00895	1717.62.peg.901	NA	NA	NA	1	36	Cargentoratense_DSM44202,"Catypicum_R2070","Caurimucosum_ATCC700975","Cbelfantii_FRC0043","Ccallunae_DSM20147","Ccamporealensis_DSM44610","Cdeserti_GIMN1010","Cdiphtheriae_NCTC11397","Cdoosanense_DSM45436","Cefficiens_YS314","Cepidermidicanis_DSM45586","Cfalsenii_DSM44353","Cglutamicum_ATCC13032","Chalotolerans_YIM70093","Chumireducens_DSM45392","Cimitans_DSM44264","Cjeikeium_K41","Ckroppenstedti…	0.102883	0.102883	1.67151	0.102883	0.102883	1.67151	258	0
ERS451417_00771	1717.62.peg.776	NA	NA	NA	1	38	Cargentoratense_DSM44202,"Catypicum_R2070","Caurimucosum_ATCC700975","Cbelfantii_FRC0043","Ccallunae_DSM20147","Ccamporealensis_DSM44610","Cdeserti_GIMN1010","Cdiphtheriae_NCTC11397","Cdoosanense_DSM45436","Cefficiens_YS314","Cepidermidicanis_DSM45586","Cfalsenii_DSM44353","Cglutamicum_ATCC13032","Cglycinophilum_AJ3170","Chalotolerans_YIM70093","Chumireducens_DSM45392","Cimitans_DSM44264","Cjeike…	0.377891	0.13339	2.30416	0.133482	0.1334	2.30416	2306	0
ERS451417_01213	1717.62.peg.1221	NA	NA	NA	1	10	Cbelfantii_FRC0043,"Cdiphtheriae_NCTC11397","Ckutscheri_DSM20755","Cpseudotuberculosis_31","Cpseudotuberculosis_ATCC19410","Crouxii_FRC0190","Csilvaticum_KL0182","Culcerans_NCTC12077","Culcerans_NCTC7910","Cvitaeruminis_DSM20294"	0.209634	0.130583	2.87591	0.209634	0.130583	2.87591	2	2	1. 0.68063;2. 90;3. 268;4. 141;5. 96;6. 286;7. 96;8. 286;9. 250;10. G;11. GGG	1. 0.66956;2. 108;3. 322;4. 160;5. 114;6. 340;7. 114;8. 340;9. 304;10. A;11. GCT
ERS451417_00301	1717.62.peg.302	NA	NA	NA	1	8	Cbelfantii_FRC0043,"Cdiphtheriae_NCTC11397","Cpseudotuberculosis_31","Cpseudotuberculosis_ATCC19410","Crouxii_FRC0190","Csilvaticum_KL0182","Culcerans_NCTC12077","Culcerans_NCTC7910"	0.137692	0.137692	2.59953	0.137683	0.137683	2.59953	2	1	1. 0.45832;2. 33;3. 97;4. 124;5. 33;6. 97;7. 35;8. 103;9. 82;10. G;11. GGC
ERS451417_00514	1717.62.peg.518	NA	NA	NA	1	39	Cargentoratense_DSM44202,"Catypicum_R2070","Caurimucosum_ATCC700975","Cbelfantii_FRC0043","Ccallunae_DSM20147","Ccamporealensis_DSM44610","Cdeserti_GIMN1010","Cdiphtheriae_NCTC11397","Cdoosanense_DSM45436","Cefficiens_YS314","Cepidermidicanis_DSM45586","Cfalsenii_DSM44353","Cglutamicum_ATCC13032","Cglycinophilum_AJ3170","Chalotolerans_YIM70093","Chumireducens_DSM45392","Cimitans_DSM44264","Cjeike…	0.115303	0.115303	1.80298	0.115303	0.115303	1.80297	258	0
ERS451417_00923	1717.62.peg.930	NA	NA	NA	1	5	Cbelfantii_FRC0043,"Cdiphtheriae_NCTC11397","Crouxii_FRC0190","Culcerans_NCTC12077","Culcerans_NCTC7910"	0.194523	0.194523	2.27201	0.194523	0.194523	2.27201	2	2	1. 0.41151;2. 27;3. 79;4. 42;5. 27;6. 79;7. 27;8. 79;9. 76;10. Q;11. CAA	1. 0.40151;2. 47;3. 139;4. 65;5. 47;6. 139;7. 47;8. 139;9. 136;10. H;11. CAC
ERS451417_00458	1717.62.peg.462	NA	NA	NA	1	39	Cargentoratense_DSM44202,"Catypicum_R2070","Caurimucosum_ATCC700975","Cbelfantii_FRC0043","Ccallunae_DSM20147","Ccamporealensis_DSM44610","Cdeserti_GIMN1010","Cdiphtheriae_NCTC11397","Cdoosanense_DSM45436","Cefficiens_YS314","Cepidermidicanis_DSM45586","Cfalsenii_DSM44353","Cglutamicum_ATCC13032","Cglycinophilum_AJ3170","Chalotolerans_YIM70093","Chumireducens_DSM45392","Cimitans_DSM44264","Cjeike…	0.222833	0.199497	1.87006	0.222833	0.199497	1.87006	2	1	1. 0.69273;2. 102;3. 304;4. 102;5. 102;6. 304;7. 102;8. 304;9. 304;10. N;11. AAC
ERS451417_00924	1717.62.peg.931	NA	NA	NA	1	23	Catypicum_R2070,"Cbelfantii_FRC0043","Ccallunae_DSM20147","Ccamporealensis_DSM44610","Cdeserti_GIMN1010","Cdiphtheriae_NCTC11397","Cdoosanense_DSM45436","Cefficiens_YS314","Cglutamicum_ATCC13032","Chalotolerans_YIM70093","Chumireducens_DSM45392","Ckutscheri_DSM20755","Clactis_RW25","Cmarinum_DSM44953","Cmustelae_DSM45274","Cpseudotuberculosis_31","Crouxii_FRC0190","Csilvaticum_KL0182","Csimulans_…	0.99991	0.204429	1.98405	0.999991	0.204429	1.98405	2048	2	1. 0.72563;2. 10;3. 28;4. 27;5. 13;6. 37;7. 13;8. 37;9. 13;10. V;11. GTA	1. 0.78026;2. 11;3. 31;4. 28;5. 14;6. 40;7. 14;8. 40;9. 16;10. L;11. CTT
ERS451417_01052	1717.62.peg.1062	NA	NA	NA	1	27	Cargentoratense_DSM44202,"Catypicum_R2070","Cbelfantii_FRC0043","Ccallunae_DSM20147","Cdeserti_GIMN1010","Cdiphtheriae_NCTC11397","Cefficiens_YS314","Cepidermidicanis_DSM45586","Cfalsenii_DSM44353","Cglutamicum_ATCC13032","Cglycinophilum_AJ3170","Chalotolerans_YIM70093","Chumireducens_DSM45392","Cjeikeium_K41","Cmarinum_DSM44953","Cmaris_DSM45190","Cmustelae_DSM45274","Cpseudotuberculosis_31","Cp…	0.480257	0.340435	1.66941	0.480257	0.340435	1.66941	2	1	1. 0.82536;2. 12;3. 34;4. 31;5. 16;6. 46;7. 19;8. 55;9. 34;10. H;11. CAC
ERS451417_00139	1717.62.peg.138	NA	NA	NA	1	9	Cbelfantii_FRC0043,"Cdiphtheriae_NCTC11397","Cpseudotuberculosis_31","Cpseudotuberculosis_ATCC19410","Crouxii_FRC0190","Csilvaticum_KL0182","Culcerans_NCTC12077","Culcerans_NCTC7910","Cvitaeruminis_DSM20294"	0.0891542	0.0891542	2.61074	0.0891542	0.0891542	2.61074	2050	1	1. 0.54269;2. 248;3. 742;4. 277;5. 263;6. 787;7. 284;8. 850;9. 427;10. V;11. GTA
ERS451417_00578	1717.62.peg.581	NA	NA	NA	1	34	Cargentoratense_DSM44202,"Catypicum_R2070","Caurimucosum_ATCC700975","Cbelfantii_FRC0043","Ccallunae_DSM20147","Ccamporealensis_DSM44610","Cdeserti_GIMN1010","Cdiphtheriae_NCTC11397","Cdoosanense_DSM45436","Cefficiens_YS314","Cepidermidicanis_DSM45586","Cglutamicum_ATCC13032","Chalotolerans_YIM70093","Chumireducens_DSM45392","Cimitans_DSM44264","Ckroppenstedtii_DSM44385","Ckutscheri_DSM20755","Cl…	0.161908	0.161908	1.98684	0.161908	0.161908	1.98684	258	0
ERS451417_01214	1717.62.peg.1222	NA	NA	NA	1	26	Cargentoratense_DSM44202,"Caurimucosum_ATCC700975","Ccamporealensis_DSM44610","Cdiphtheriae_NCTC11397","Cdoosanense_DSM45436","Cepidermidicanis_DSM45586","Chalotolerans_YIM70093","Chumireducens_DSM45392","Cimitans_DSM44264","Cjeikeium_K41","Cmarinum_DSM44953","Cmaris_DSM45190","Cmustelae_DSM45274","Cpseudotuberculosis_31","Cpseudotuberculosis_ATCC19410","CriegeliiPUDD83A45","Crouxii_FRC0190","Csi…	4.15051	0.223328	1.66557	0.226874	0.226874	1.67114	3328	0
ERS451417_00985	1717.62.peg.996	NA	NA	NA	1	38	Cargentoratense_DSM44202,"Catypicum_R2070","Caurimucosum_ATCC700975","Cbelfantii_FRC0043","Ccallunae_DSM20147","Ccamporealensis_DSM44610","Cdeserti_GIMN1010","Cdiphtheriae_NCTC11397","Cdoosanense_DSM45436","Cefficiens_YS314","Cepidermidicanis_DSM45586","Cfalsenii_DSM44353","Cglutamicum_ATCC13032","Cglycinophilum_AJ3170","Chalotolerans_YIM70093","Chumireducens_DSM45392","Cimitans_DSM44264","Cjeike…	0.521324	0.197391	1.65799	0.286512	0.197381	1.65799	258	0
ERS451417_00448	1717.62.peg.451	NA	NA	NA	1	17	Cbelfantii_FRC0043,"Ccallunae_DSM20147","Ccamporealensis_DSM44610","Cdeserti_GIMN1010","Cdiphtheriae_NCTC11397","Cepidermidicanis_DSM45586","Cglutamicum_ATCC13032","Ckutscheri_DSM20755","Cmustelae_DSM45274","Cpseudotuberculosis_31","Cpseudotuberculosis_ATCC19410","Crouxii_FRC0190","Csilvaticum_KL0182","Ctestudinoris_DSM44614","Culcerans_NCTC12077","Culcerans_NCTC7910","Cuterequi_DSM45634"	0.123487	0.123487	2.19058	0.123487	0.123487	2.19058	258	0
ERS451417_00794	1717.62.peg.800	NA	NA	NA	1	36	Cargentoratense_DSM44202,"Caurimucosum_ATCC700975","Cbelfantii_FRC0043","Ccallunae_DSM20147","Ccamporealensis_DSM44610","Cdeserti_GIMN1010","Cdiphtheriae_NCTC11397","Cdoosanense_DSM45436","Cefficiens_YS314","Cepidermidicanis_DSM45586","Cfalsenii_DSM44353","Cglutamicum_ATCC13032","Cglycinophilum_AJ3170","Chalotolerans_YIM70093","Chumireducens_DSM45392","Cimitans_DSM44264","Cjeikeium_K41","Ckutsche…	0.152989	0.152989	1.99376	0.152989	0.152989	1.99375	2	1	1. 0.56268;2. 220;3. 658;4. 329;5. 329;6. 985;7. 368;8. 1102;9. 514;10. I;11. ATC
ERS451417_00140	1717.62.peg.139	NA	NA	NA	1	39	Cargentoratense_DSM44202,"Catypicum_R2070","Caurimucosum_ATCC700975","Cbelfantii_FRC0043","Ccallunae_DSM20147","Ccamporealensis_DSM44610","Cdeserti_GIMN1010","Cdiphtheriae_NCTC11397","Cdoosanense_DSM45436","Cefficiens_YS314","Cepidermidicanis_DSM45586","Cfalsenii_DSM44353","Cglutamicum_ATCC13032","Cglycinophilum_AJ3170","Chalotolerans_YIM70093","Chumireducens_DSM45392","Cimitans_DSM44264","Cjeike…	0.0568239	0.0568239	2.22648	0.0568239	0.0568239	2.22648	1282	0
ERS451417_00618	1717.62.peg.622	NA	NA	NA	1	39	Cargentoratense_DSM44202,"Catypicum_R2070","Caurimucosum_ATCC700975","Cbelfantii_FRC0043","Ccallunae_DSM20147","Ccamporealensis_DSM44610","Cdeserti_GIMN1010","Cdiphtheriae_NCTC11397","Cdoosanense_DSM45436","Cefficiens_YS314","Cepidermidicanis_DSM45586","Cfalsenii_DSM44353","Cglutamicum_ATCC13032","Cglycinophilum_AJ3170","Chalotolerans_YIM70093","Chumireducens_DSM45392","Cimitans_DSM44264","Cjeike…	0.105663	0.105663	1.95571	0.105663	0.105663	1.95571	2	1	1. 0.56445;2. 125;3. 373;4. 146;5. 146;6. 436;7. 248;8. 742;9. 343;10. G;11. GGA
ERS451417_00368	1717.62.peg.367	NA	NA	NA	1	3	Cbelfantii_FRC0043,"Cdiphtheriae_NCTC11397","Crouxii_FRC0190"	0.165085	0.165085	3.98059	0.165085	0.165085	3.98059	386	0
ERS451417_00128	1717.62.peg.126	NA	NA	NA	1	39	Cargentoratense_DSM44202,"Catypicum_R2070","Caurimucosum_ATCC700975","Cbelfantii_FRC0043","Ccallunae_DSM20147","Ccamporealensis_DSM44610","Cdeserti_GIMN1010","Cdiphtheriae_NCTC11397","Cdoosanense_DSM45436","Cefficiens_YS314","Cepidermidicanis_DSM45586","Cfalsenii_DSM44353","Cglutamicum_ATCC13032","Cglycinophilum_AJ3170","Chalotolerans_YIM70093","Chumireducens_DSM45392","Cimitans_DSM44264","Cjeike…	0.162895	0.162895	1.78273	0.162895	0.162895	1.78273	258	0
ERS451417_00796	1717.62.peg.802	NA	NA	NA	1	39	Cargentoratense_DSM44202,"Catypicum_R2070","Caurimucosum_ATCC700975","Cbelfantii_FRC0043","Ccallunae_DSM20147","Ccamporealensis_DSM44610","Cdeserti_GIMN1010","Cdiphtheriae_NCTC11397","Cdoosanense_DSM45436","Cefficiens_YS314","Cepidermidicanis_DSM45586","Cfalsenii_DSM44353","Cglutamicum_ATCC13032","Cglycinophilum_AJ3170","Chalotolerans_YIM70093","Chumireducens_DSM45392","Cimitans_DSM44264","Cjeike…	0.0981722	0.0981722	1.96438	0.0981814	0.0981814	1.96438	2	2	1. 0.44407;2. 234;3. 700;4. 248;5. 248;6. 742;7. 269;8. 805;9. 655;10. A;11. GCT	1. 0.43803;2. 495;3. 1483;4. 513;5. 513;6. 1537;7. 541;8. 1621;9. 1375;10. E;11. GAA
ERS451417_00317	1717.62.peg.319	NA	NA	NA	1	39	Cargentoratense_DSM44202,"Catypicum_R2070","Caurimucosum_ATCC700975","Cbelfantii_FRC0043","Ccallunae_DSM20147","Ccamporealensis_DSM44610","Cdeserti_GIMN1010","Cdiphtheriae_NCTC11397","Cdoosanense_DSM45436","Cefficiens_YS314","Cepidermidicanis_DSM45586","Cfalsenii_DSM44353","Cglutamicum_ATCC13032","Cglycinophilum_AJ3170","Chalotolerans_YIM70093","Chumireducens_DSM45392","Cimitans_DSM44264","Cjeike…	0.174083	0.174083	1.5986	0.174083	0.174083	1.5986	3330	0
ERS451417_00529	1717.62.peg.532	NA	NA	NA	1	7	Cbelfantii_FRC0043,"Cdiphtheriae_NCTC11397","Cpseudotuberculosis_ATCC19410","Crouxii_FRC0190","Csilvaticum_KL0182","Culcerans_NCTC12077","Culcerans_NCTC7910"	0.298145	0.290411	3.26327	0.298145	0.290411	3.26327	2050	3	1. 0.493;2. 15;3. 43;4. 40;5. 15;6. 43;7. 15;8. 43;9. 22;10. M;11. ATG	1. 0.48291;2. 278;3. 832;4. 406;5. 292;6. 874;7. 307;8. 919;9. 574;10. G;11. GGC	1. 0.49862;2. 331;3. 991;4. 545;5. 345;6. 1033;7. 360;8. 1078;9. 733;10. P;11. CCT
ERS451417_00131	1717.62.peg.130	NA	NA	NA	1	8	Cbelfantii_FRC0043,"Cdiphtheriae_NCTC11397","Cpseudotuberculosis_31","Cpseudotuberculosis_ATCC19410","Crouxii_FRC0190","Csilvaticum_KL0182","Culcerans_NCTC12077","Culcerans_NCTC7910"	0.412128	0.334918	5.43222	0.412128	0.334918	5.43222	2	3	1. 0.54453;2. 10;3. 28;4. 19;5. 10;6. 28;7. 10;8. 28;9. 1;10. G;11. GGC	1. 0.49923;2. 12;3. 34;4. 21;5. 12;6. 34;7. 12;8. 34;9. 7;10. A;11. GCT	1. 0.53092;2. 114;3. 340;4. 177;5. 114;6. 340;7. 114;8. 340;9. 295;10. A;11. GCC
ERS451417_00032	1717.62.peg.29	NA	NA	NA	1	12	Cbelfantii_FRC0043,"Ccallunae_DSM20147","Cdeserti_GIMN1010","Cdiphtheriae_NCTC11397","Cefficiens_YS314","Cglutamicum_ATCC13032","Cpseudotuberculosis_31","Crouxii_FRC0190","Csilvaticum_KL0182","Culcerans_NCTC12077","Culcerans_NCTC7910","Cvitaeruminis_DSM20294"	0.999981	0.0752582	1.83642	1	0.0752586	1.83642	1024	5	1. 0.8467;2. 28;3. 82;4. 32;5. 28;6. 82;7. 37;8. 109;9. 7;10. A;11. GCG	1. 0.55977;2. 30;3. 88;4. 34;5. 30;6. 88;7. 39;8. 115;9. 13;10. A;11. GCG	1. 0.57758;2. 52;3. 154;4. 56;5. 52;6. 154;7. 61;8. 181;9. 79;10. H;11. CAC	1. 0.64715;2. 161;3. 481;4. 182;5. 163;6. 487;7. 172;8. 514;9. 403;10. R;11. AGG	1. 0.49935;2. 163;3. 487;4. 184;5. 165;6. 493;7. 174;8. 520;9. 409;10. L;11. CTC
ERS451417_00670	1717.62.peg.677	NA	NA	NA	1	16	Cargentoratense_DSM44202,"Cbelfantii_FRC0043","Cdiphtheriae_NCTC11397","Cefficiens_YS314","Cepidermidicanis_DSM45586","Ckroppenstedtii_DSM44385","Ckutscheri_DSM20755","Clactis_RW25","Cmustelae_DSM45274","Cpseudotuberculosis_31","Cpseudotuberculosis_ATCC19410","Crouxii_FRC0190","Csilvaticum_KL0182","Culcerans_NCTC12077","Culcerans_NCTC7910","Cvitaeruminis_DSM20294"	0.0865108	0.0865108	2.18709	0.0865108	0.0865108	2.18709	258	0
ERS451417_00327	1717.62.peg.329	NA	NA	NA	1	3	Cbelfantii_FRC0043,"Cdiphtheriae_NCTC11397","Crouxii_FRC0190"	0.0509	0.0509	4.564	0.0509	0.0509	4.564	130	1	1. 0.48717;2. 102;3. 304;4. 167;5. 102;6. 304;7. 102;8. 304;9. 304;10. I;11. ATA
ERS451417_01162	1717.62.peg.1173	NA	NA	NA	1	37	Cargentoratense_DSM44202,"Catypicum_R2070","Caurimucosum_ATCC700975","Cbelfantii_FRC0043","Ccallunae_DSM20147","Ccamporealensis_DSM44610","Cdeserti_GIMN1010","Cdiphtheriae_NCTC11397","Cdoosanense_DSM45436","Cefficiens_YS314","Cepidermidicanis_DSM45586","Cfalsenii_DSM44353","Cglutamicum_ATCC13032","Cglycinophilum_AJ3170","Chalotolerans_YIM70093","Chumireducens_DSM45392","Cimitans_DSM44264","Cjeike…	0.121344	0.121344	1.94936	0.121344	0.121344	1.94937	1026	2	1. 0.42071;2. 227;3. 679;4. 238;5. 238;6. 712;7. 275;8. 823;9. 640;10. D;11. GAC	1. 0.62284;2. 257;3. 769;4. 268;5. 268;6. 802;7. 308;8. 922;9. 691;10. V;11. GTA
ERS451417_00311	1717.62.peg.312	NA	NA	NA	1	39	Cargentoratense_DSM44202,"Catypicum_R2070","Caurimucosum_ATCC700975","Cbelfantii_FRC0043","Ccallunae_DSM20147","Ccamporealensis_DSM44610","Cdeserti_GIMN1010","Cdiphtheriae_NCTC11397","Cdoosanense_DSM45436","Cefficiens_YS314","Cepidermidicanis_DSM45586","Cfalsenii_DSM44353","Cglutamicum_ATCC13032","Cglycinophilum_AJ3170","Chalotolerans_YIM70093","Chumireducens_DSM45392","Cimitans_DSM44264","Cjeike…	0.226141	0.212718	1.94017	0.226141	0.212718	1.94017	2	1	1. 0.64724;2. 110;3. 328;4. 150;5. 150;6. 448;7. 202;8. 604;9. 319;10. E;11. GAG
ERS451417_01148	1717.62.peg.1159	NA	NA	NA	1	38	Cargentoratense_DSM44202,"Catypicum_R2070","Caurimucosum_ATCC700975","Cbelfantii_FRC0043","Ccallunae_DSM20147","Ccamporealensis_DSM44610","Cdeserti_GIMN1010","Cdiphtheriae_NCTC11397","Cdoosanense_DSM45436","Cefficiens_YS314","Cepidermidicanis_DSM45586","Cfalsenii_DSM44353","Cglutamicum_ATCC13032","Cglycinophilum_AJ3170","Chalotolerans_YIM70093","Chumireducens_DSM45392","Cimitans_DSM44264","Ckropp…	0.161326	0.161326	1.67542	0.161326	0.161326	1.67542	258	0
ERS451417_00496	1717.62.peg.499	NA	NA	NA	1	39	Cargentoratense_DSM44202,"Catypicum_R2070","Caurimucosum_ATCC700975","Cbelfantii_FRC0043","Ccallunae_DSM20147","Ccamporealensis_DSM44610","Cdeserti_GIMN1010","Cdiphtheriae_NCTC11397","Cdoosanense_DSM45436","Cefficiens_YS314","Cepidermidicanis_DSM45586","Cfalsenii_DSM44353","Cglutamicum_ATCC13032","Cglycinophilum_AJ3170","Chalotolerans_YIM70093","Chumireducens_DSM45392","Cimitans_DSM44264","Cjeike…	0.192375	0.192375	1.66788	0.192375	0.192375	1.66787	3330	0
ERS451417_00852	1717.62.peg.857	NA	NA	NA	1	39	Cargentoratense_DSM44202,"Catypicum_R2070","Caurimucosum_ATCC700975","Cbelfantii_FRC0043","Ccallunae_DSM20147","Ccamporealensis_DSM44610","Cdeserti_GIMN1010","Cdiphtheriae_NCTC11397","Cdoosanense_DSM45436","Cefficiens_YS314","Cepidermidicanis_DSM45586","Cfalsenii_DSM44353","Cglutamicum_ATCC13032","Cglycinophilum_AJ3170","Chalotolerans_YIM70093","Chumireducens_DSM45392","Cimitans_DSM44264","Cjeike…	0.125867	0.125867	1.79511	0.125867	0.125867	1.79512	258	0
ERS451417_00568	1717.62.peg.571	NA	NA	NA	1	38	Cargentoratense_DSM44202,"Catypicum_R2070","Caurimucosum_ATCC700975","Cbelfantii_FRC0043","Ccallunae_DSM20147","Ccamporealensis_DSM44610","Cdeserti_GIMN1010","Cdiphtheriae_NCTC11397","Cdoosanense_DSM45436","Cefficiens_YS314","Cepidermidicanis_DSM45586","Cfalsenii_DSM44353","Cglutamicum_ATCC13032","Cglycinophilum_AJ3170","Chalotolerans_YIM70093","Chumireducens_DSM45392","Cimitans_DSM44264","Cjeike…	0.233069	0.233069	1.59774	0.233069	0.233069	1.59774	3330	0
ERS451417_00231	1717.62.peg.227	NA	NA	NA	1	39	Cargentoratense_DSM44202,"Catypicum_R2070","Caurimucosum_ATCC700975","Cbelfantii_FRC0043","Ccallunae_DSM20147","Ccamporealensis_DSM44610","Cdeserti_GIMN1010","Cdiphtheriae_NCTC11397","Cdoosanense_DSM45436","Cefficiens_YS314","Cepidermidicanis_DSM45586","Cfalsenii_DSM44353","Cglutamicum_ATCC13032","Cglycinophilum_AJ3170","Chalotolerans_YIM70093","Chumireducens_DSM45392","Cimitans_DSM44264","Cjeike…	0.089889	0.089889	2.10483	0.089889	0.089889	2.10483	258	0
ERS451417_00984	1717.62.peg.995	NA	NA	NA	1	7	Cbelfantii_FRC0043,"Cdiphtheriae_NCTC11397","Cpseudotuberculosis_31","Cpseudotuberculosis_ATCC19410","Crouxii_FRC0190","Culcerans_NCTC12077","Culcerans_NCTC7910"	0.305303	0.305303	3.35653	0.305312	0.305312	3.35653	2	3	1. 0.55929;2. 56;3. 166;4. 75;5. 57;6. 169;7. 56;8. 166;9. 130;10. T;11. ACC	1. 0.50251;2. 193;3. 577;4. 221;5. 194;6. 580;7. 193;8. 577;9. 541;10. K;11. AAA	1. 0.48314;2. 265;3. 793;4. 327;5. 266;6. 796;7. 274;8. 820;9. 676;10. L;11. CTC
ERS451417_00500	1717.62.peg.504	NA	NA	NA	1	3	Cbelfantii_FRC0043,"Cdiphtheriae_NCTC11397","Crouxii_FRC0190"	0	0	2.73974	0	0	2.73974	386	0
ERS451417_00068	1717.62.peg.64	NA	NA	NA	1	16	Cbelfantii_FRC0043,"Ccallunae_DSM20147","Cdiphtheriae_NCTC11397","Cdoosanense_DSM45436","Chalotolerans_YIM70093","Chumireducens_DSM45392","Cmarinum_DSM44953","Cmaris_DSM45190","Cpseudotuberculosis_31","Cpseudotuberculosis_ATCC19410","Crouxii_FRC0190","Csilvaticum_KL0182","Ctestudinoris_DSM44614","Culcerans_NCTC12077","Culcerans_NCTC7910","Cvitaeruminis_DSM20294"	0.149231	0.149034	1.63664	1	0.140822	1.63338	258	0
ERS451417_00377	1717.62.peg.377	NA	NA	NA	1	4	Cdiphtheriae_NCTC11397,"Crouxii_FRC0190","Csimulans_PES1","Culcerans_NCTC12077"	0.616005	0.356281	5.96178	0.616005	0.356281	5.96178	3074	3	1. 0.66271;2. 22;3. 64;4. 25;5. 22;6. 64;7. 22;8. 64;9. 61;10. A;11. GCC	1. 0.78027;2. 34;3. 100;4. 37;5. 34;6. 100;7. 34;8. 100;9. 97;10. A;11. GCT	1. 0.6956;2. 61;3. 181;4. 64;5. 61;6. 181;7. 61;8. 181;9. 178;10. V;11. GTT
ERS451417_01055	1717.62.peg.1066	NA	NA	NA	1	39	Cargentoratense_DSM44202,"Catypicum_R2070","Caurimucosum_ATCC700975","Cbelfantii_FRC0043","Ccallunae_DSM20147","Ccamporealensis_DSM44610","Cdeserti_GIMN1010","Cdiphtheriae_NCTC11397","Cdoosanense_DSM45436","Cefficiens_YS314","Cepidermidicanis_DSM45586","Cfalsenii_DSM44353","Cglutamicum_ATCC13032","Cglycinophilum_AJ3170","Chalotolerans_YIM70093","Chumireducens_DSM45392","Cimitans_DSM44264","Cjeike…	0.142506	0.142506	1.8109	0.142506	0.142506	1.8109	258	0
ERS451417_00638	1717.62.peg.642	NA	NA	NA	1	17	Cargentoratense_DSM44202,"Cbelfantii_FRC0043","Cdiphtheriae_NCTC11397","Cepidermidicanis_DSM45586","Chalotolerans_YIM70093","Chumireducens_DSM45392","Clactis_RW25","Cmarinum_DSM44953","Cmustelae_DSM45274","Cpseudotuberculosis_31","Cpseudotuberculosis_ATCC19410","Crouxii_FRC0190","Csilvaticum_KL0182","Ctestudinoris_DSM44614","Culcerans_NCTC12077","Culcerans_NCTC7910","Cvitaeruminis_DSM20294"	0.181644	0.181644	1.98935	0.181644	0.181644	1.98935	2050	1	1. 0.52699;2. 236;3. 706;4. 706;5. 255;6. 763;7. 275;8. 823;9. 487;10. G;11. GGG
