# Supplementary material for: Evidence of episodic positive selection in Corynebacterium diphtheriae complex of species and its implementations in identification of drug and vaccine targets
Source: PeerJ. 2022 Feb 16;10:e12662. doi: 10.7717/peerj.12662 (PMC8857904; doi:10.7717/peerj.12662)
Supplement: Supplemental Information 11 [file peerj-10-12662-s011.xlsx]

## Sheet: Cul
Gene	Transcript	Bonferroni	FDR	P-Value	P-Value raw	Number of species included	Species included	HA foreground omega	HA background omega	HA kappa	H0 foreground omega	H0 background omega	H0 kappa	Correction code	Number of Sites under positive Selection	Site under positve Selection 1(1. Probability to be under positive selection;2. Position in amino acid sequence of anchor species;3. Position in nucleotide sequence of anchor species;4.Position in main protein alignment:fastp.clustalw.aln;5. Position in protein clustal subalignment: .aln;6. Position in to codon backtranslated clustal subalignment: Codon_aln.fasta; 7. Position in prank alignment (…	Site under positve Selection 2	Site under positve Selection 3	Site under positve Selection 4	Site under positve Selection 5	Site under positve Selection 6	Site under positve Selection 7	Site under positve Selection 8	Site under positve Selection 9	Site under positve Selection 10	Site under positve Selection 11	Site under positve Selection 12	Site under positve Selection 13	Site under positve Selection 14	Site under positve Selection 15	Site under positve Selection 16	Site under positve Selection 17	Site under positve Selection 18	Site under positve Selection 19	Site under positve Selection 20	Site under positve Selection 21	Site under positve Selection 22	Site under positve Selection 23	Site under positve Selection 24	Site under positve Selection 25	Site under positve Selection 26	Site under positve Selection 27	Site under positve Selection 28	Site under positve Selection 29	Site under positve Selection 30	Site under positve Selection 31	Site under positve Selection 32	Site under positve Selection 33	Site under positve Selection 34
ERS451417_00836	1717.62.peg.841	0.02494	0.02494	0.004988	0.004988	39	Cargentoratense_DSM44202,"Catypicum_R2070","Caurimucosum_ATCC700975","Cbelfantii_FRC0043","Ccallunae_DSM20147","Ccamporealensis_DSM44610","Cdeserti_GIMN1010","Cdiphtheriae_NCTC11397","Cdoosanense_DSM45436","Cefficiens_YS314","Cepidermidicanis_DSM45586","Cfalsenii_DSM44353","Cglutamicum_ATCC13032","Cglycinophilum_AJ3170","Chalotolerans_YIM70093","Chumireducens_DSM45392","Cimitans_DSM44264","Cjeike…	2.79943	0.0923865	1.86919	0.110799	0.0923583	1.86988	0	1	1. 0.98299;2. 385;3. 1153;4. 409;5. 409;6. 1225;7. 449;8. 1345;9. 1087;10. T;11. ACC
ERS451417_00303	1717.62.peg.304	0.16955	0.084775	0.03391	0.03391	22	Catypicum_R2070,"Caurimucosum_ATCC700975","Cbelfantii_FRC0043","Ccamporealensis_DSM44610","Cdiphtheriae_NCTC11397","Cepidermidicanis_DSM45586","Chumireducens_DSM45392","Cimitans_DSM44264","Cmarinum_DSM44953","Cmustelae_DSM45274","Cpseudotuberculosis_31","Cpseudotuberculosis_ATCC19410","CriegeliiPUDD83A45","Crouxii_FRC0190","Csilvaticum_KL0182","Csimulans_PES1","Csingulare_IBSB52218","Ctestudinori…	14.6369	0.133372	1.09423	0.170065	0.133626	1.09469	0	1	1. 0.78088;2. 19;3. 55;4. 22;5. 22;6. 64;7. 22;8. 64;9. 40;10. E;11. GAG
ERS451417_01307	1717.62.peg.1315	0.9025	0.23425	0.1805	0.1805	37	Cargentoratense_DSM44202,"Catypicum_R2070","Caurimucosum_ATCC700975","Cbelfantii_FRC0043","Ccallunae_DSM20147","Ccamporealensis_DSM44610","Cdeserti_GIMN1010","Cdiphtheriae_NCTC11397","Cdoosanense_DSM45436","Cefficiens_YS314","Cepidermidicanis_DSM45586","Cfalsenii_DSM44353","Cglutamicum_ATCC13032","Cglycinophilum_AJ3170","Chalotolerans_YIM70093","Chumireducens_DSM45392","Cimitans_DSM44264","Cjeike…	1.1332	0.0632006	2.08443	0.129845	0.0638738	2.08103	0	1	1. 0.76244;2. 69;3. 205;4. 69;5. 69;6. 205;7. 69;8. 205;9. 202;10. A;11. GCG
ERS451417_02222	1717.62.peg.2247	0.937	0.23425	0.1874	0.1874	36	Cargentoratense_DSM44202,"Catypicum_R2070","Caurimucosum_ATCC700975","Cbelfantii_FRC0043","Ccallunae_DSM20147","Ccamporealensis_DSM44610","Cdeserti_GIMN1010","Cdiphtheriae_NCTC11397","Cdoosanense_DSM45436","Cefficiens_YS314","Cepidermidicanis_DSM45586","Cfalsenii_DSM44353","Cglutamicum_ATCC13032","Cglycinophilum_AJ3170","Chalotolerans_YIM70093","Chumireducens_DSM45392","Cimitans_DSM44264","Cjeike…	2.83508	0.0880691	1.82843	0.0879819	0.0879819	1.82631	0	2	1. 0.7376;2. 188;3. 562;4. 220;5. 220;6. 658;7. 277;8. 829;9. 349;10. M;11. ATG	1. 0.40657;2. 496;3. 1486;4. 529;5. 529;6. 1585;7. 589;8. 1765;9. 1222;10. L;11. CTG
ERS451417_01998	1717.62.peg.2002	1	1	1	1	7	Cbelfantii_FRC0043,"Cdiphtheriae_NCTC11397","Cpseudotuberculosis_31","Cpseudotuberculosis_ATCC19410","Csilvaticum_KL0182","Culcerans_NCTC12077","Culcerans_NCTC7910"	1	0.307717	4.84809	1	0.307717	4.84813	0	1	1. 0.80621;2. 464;3. 1390;4. 465;5. 465;6. 1393;7. 465;8. 1393;9. 1375;10. D;11. GAC
ERS451417_01451	1717.62.peg.1458	NA	NA	NA	0.0041	10	Cbelfantii_FRC0043,"Cdiphtheriae_NCTC11397","Ckutscheri_DSM20755","Cmustelae_DSM45274","Cpseudotuberculosis_31","Cpseudotuberculosis_ATCC19410","Csilvaticum_KL0182","Culcerans_NCTC12077","Culcerans_NCTC7910","Cvitaeruminis_DSM20294"	0.213725	0.131333	2.50495	0.138954	0.138954	2.45689	2	4	1. 0.80647;2. 32;3. 94;4. 32;5. 32;6. 94;7. 32;8. 94;9. 91;10. Q;11. CAA	1. 0.6613;2. 102;3. 304;4. 102;5. 102;6. 304;7. 102;8. 304;9. 301;10. S;11. AGC	1. 0.51635;2. 250;3. 748;4. 250;5. 250;6. 748;7. 250;8. 748;9. 745;10. P;11. CCT	1. 0.41049;2. 255;3. 763;4. 255;5. 255;6. 763;7. 255;8. 763;9. 760;10. R;11. CGC
ERS451417_00097	1717.62.peg.95	NA	NA	NA	0.004119	31	Catypicum_R2070,"Caurimucosum_ATCC700975","Cbelfantii_FRC0043","Ccallunae_DSM20147","Ccamporealensis_DSM44610","Cdeserti_GIMN1010","Cdiphtheriae_NCTC11397","Cdoosanense_DSM45436","Cefficiens_YS314","Cepidermidicanis_DSM45586","Cglutamicum_ATCC13032","Chalotolerans_YIM70093","Chumireducens_DSM45392","Cimitans_DSM44264","Ckutscheri_DSM20755","Cmarinum_DSM44953","Cmaris_DSM45190","Cmustelae_DSM45274…	0.27609	0.143395	1.40702	0.16248	0.143238	1.40708	2050	5	1. 0.62124;2. 31;3. 91;4. 71;5. 61;6. 181;7. 88;8. 262;9. 19;10. A;11. GCG	1. 0.43614;2. 296;3. 886;4. 356;5. 344;6. 1030;7. 371;8. 1111;9. 646;10. A;11. GCC	1. 0.98861;2. 396;3. 1186;4. 456;5. 444;6. 1330;7. 471;8. 1411;9. 862;10. N;11. AAC	1. 0.46444;2. 468;3. 1402;4. 531;5. 519;6. 1555;7. 546;8. 1636;9. 1066;10. V;11. GTG	1. 0.98766;2. 508;3. 1522;4. 571;5. 559;6. 1675;7. 586;8. 1756;9. 1186;10. A;11. GCA
ERS451417_00326	1717.62.peg.328	NA	NA	NA	0.004669	39	Cargentoratense_DSM44202,"Catypicum_R2070","Caurimucosum_ATCC700975","Cbelfantii_FRC0043","Ccallunae_DSM20147","Ccamporealensis_DSM44610","Cdeserti_GIMN1010","Cdiphtheriae_NCTC11397","Cdoosanense_DSM45436","Cefficiens_YS314","Cepidermidicanis_DSM45586","Cfalsenii_DSM44353","Cglutamicum_ATCC13032","Cglycinophilum_AJ3170","Chalotolerans_YIM70093","Chumireducens_DSM45392","Cimitans_DSM44264","Cjeike…	0.944242	0.207042	1.67249	0.225342	0.206924	1.67352	1024	1	1. 0.99439;2. 116;3. 346;4. 145;5. 145;6. 433;7. 316;8. 946;9. 286;10. Q;11. CAG
ERS451417_01805	1717.62.peg.1811	NA	NA	NA	0.0117	38	Cargentoratense_DSM44202,"Catypicum_R2070","Caurimucosum_ATCC700975","Cbelfantii_FRC0043","Ccallunae_DSM20147","Ccamporealensis_DSM44610","Cdeserti_GIMN1010","Cdiphtheriae_NCTC11397","Cdoosanense_DSM45436","Cefficiens_YS314","Cepidermidicanis_DSM45586","Cfalsenii_DSM44353","Cglutamicum_ATCC13032","Cglycinophilum_AJ3170","Chalotolerans_YIM70093","Chumireducens_DSM45392","Cimitans_DSM44264","Cjeike…	3.06992	0.0831592	1.59813	0.0831572	0.0831572	1.59638	1024	1	1. 0.7845;2. 396;3. 1186;4. 433;5. 433;6. 1297;7. 535;8. 1603;9. 1045;10. R;11. CGT
ERS451417_00931	1717.62.peg.938	NA	NA	NA	0.01562	36	Catypicum_R2070,"Caurimucosum_ATCC700975","Cbelfantii_FRC0043","Ccallunae_DSM20147","Ccamporealensis_DSM44610","Cdeserti_GIMN1010","Cdiphtheriae_NCTC11397","Cdoosanense_DSM45436","Cefficiens_YS314","Cepidermidicanis_DSM45586","Cfalsenii_DSM44353","Cglutamicum_ATCC13032","Cglycinophilum_AJ3170","Chalotolerans_YIM70093","Chumireducens_DSM45392","Cjeikeium_K41","Ckroppenstedtii_DSM44385","Ckutscheri…	5.72668	0.216699	1.49431	0.24268	0.216286	1.49685	3072	2	1. 0.95245;2. 77;3. 229;4. 99;5. 99;6. 295;7. 121;8. 361;9. 154;10. T;11. ACC	1. 0.54057;2. 114;3. 340;4. 136;5. 136;6. 406;7. 159;8. 475;9. 226;10. V;11. GTC
ERS451417_01736	1717.62.peg.1740	NA	NA	NA	0.01578	38	Cargentoratense_DSM44202,"Catypicum_R2070","Caurimucosum_ATCC700975","Cbelfantii_FRC0043","Ccallunae_DSM20147","Ccamporealensis_DSM44610","Cdeserti_GIMN1010","Cdiphtheriae_NCTC11397","Cdoosanense_DSM45436","Cefficiens_YS314","Cepidermidicanis_DSM45586","Cfalsenii_DSM44353","Cglutamicum_ATCC13032","Cglycinophilum_AJ3170","Chalotolerans_YIM70093","Chumireducens_DSM45392","Cimitans_DSM44264","Cjeike…	4.34972	0.184659	1.78703	0.196011	0.184631	1.78843	2048	3	1. 0.42839;2. 117;3. 349;4. 150;5. 150;6. 448;7. 181;8. 541;9. 232;10. T;11. ACC	1. 0.4856;2. 138;3. 412;4. 171;5. 171;6. 511;7. 202;8. 604;9. 295;10. I;11. ATC	1. 0.98118;2. 156;3. 466;4. 189;5. 189;6. 565;7. 220;8. 658;9. 349;10. V;11. GTG
ERS451417_00159	1717.62.peg.157	NA	NA	NA	0.01656	5	Cdiphtheriae_NCTC11397,"Cpseudotuberculosis_31","Cpseudotuberculosis_ATCC19410","Culcerans_NCTC12077","Culcerans_NCTC7910"	44.5539	0.217952	4.50786	0.335739	0.236358	4.23978	4096	9	1. 0.48049;2. 117;3. 349;4. 122;5. 121;6. 361;7. 129;8. 385;9. 298;10. K;11. AAA	1. 0.4877;2. 119;3. 355;4. 124;5. 123;6. 367;7. 131;8. 391;9. 304;10. K;11. AAG	1. 0.68901;2. 126;3. 376;4. 132;5. 130;6. 388;7. 138;8. 412;9. 325;10. G;11. GGT	1. 0.5965;2. 129;3. 385;4. 135;5. 133;6. 397;7. 141;8. 421;9. 334;10. D;11. GAT	1. 0.64684;2. 151;3. 451;4. 157;5. 155;6. 463;7. 163;8. 487;9. 400;10. P;11. CCA	1. 0.53662;2. 180;3. 538;4. 189;5. 184;6. 550;7. 192;8. 574;9. 487;10. A;11. GCA	1. 0.77002;2. 233;3. 697;4. 254;5. 247;6. 739;7. 262;8. 784;9. 559;10. G;11. GGA	1. 0.63507;2. 237;3. 709;4. 258;5. 251;6. 751;7. 266;8. 796;9. 571;10. I;11. ATA	1. 0.5788;2. 250;3. 748;4. 271;5. 264;6. 790;7. 279;8. 835;9. 610;10. V;11. GTA
ERS451417_00197	1717.62.peg.194	NA	NA	NA	0.01707	5	Cbelfantii_FRC0043,"Cdiphtheriae_NCTC11397","Crouxii_FRC0190","Culcerans_NCTC12077","Culcerans_NCTC7910"	4.93072	0.120774	4.43044	0.48996	0.130918	4.31563	4096	41	1. 0.94802;2. 2;3. 4;4. 136;5. 7;6. 19;7. 5;8. 13;9. 1;10. N;11. AAT	1. 0.94462;2. 4;3. 10;4. 138;5. 9;6. 25;7. 7;8. 19;9. 7;10. V;11. GTA	1. 0.94721;2. 45;3. 133;4. 179;5. 50;6. 148;7. 50;8. 148;9. 97;10. D;11. GAC	1. 0.96194;2. 46;3. 136;4. 180;5. 51;6. 151;7. 51;8. 151;9. 100;10. Q;11. CAA	1. 0.95028;2. 69;3. 205;4. 216;5. 83;6. 247;7. 83;8. 247;9. 154;10. L;11. CTG	1. 0.93936;2. 74;3. 220;4. 221;5. 88;6. 262;7. 88;8. 262;9. 169;10. R;11. CGC	1. 0.96928;2. 83;3. 247;4. 230;5. 97;6. 289;7. 97;8. 289;9. 196;10. P;11. CCG	1. 0.93996;2. 84;3. 250;4. 236;5. 98;6. 292;7. 98;8. 292;9. 199;10. L;11. CTA	1. 0.95639;2. 85;3. 253;4. 237;5. 99;6. 295;7. 99;8. 295;9. 202;10. E;11. GAA	1. 0.96714;2. 87;3. 259;4. 239;5. 101;6. 301;7. 101;8. 301;9. 208;10. S;11. TCG	1. 0.91968;2. 92;3. 274;4. 244;5. 106;6. 316;7. 106;8. 316;9. 223;10. V;11. GTT	1. 0.9799;2. 93;3. 277;4. 245;5. 107;6. 319;7. 107;8. 319;9. 226;10. T;11. ACG	1. 0.93291;2. 105;3. 313;4. 257;5. 119;6. 355;7. 119;8. 355;9. 262;10. R;11. CGG	1. 0.92476;2. 114;3. 340;4. 266;5. 128;6. 382;7. 128;8. 382;9. 286;10. T;11. ACG	1. 0.9598;2. 115;3. 343;4. 267;5. 129;6. 385;7. 129;8. 385;9. 289;10. P;11. CCG	1. 0.93528;2. 117;3. 349;4. 284;5. 131;6. 391;7. 131;8. 391;9. 295;10. G;11. GGA	1. 0.93205;2. 146;3. 436;4. 313;5. 160;6. 478;7. 160;8. 478;9. 382;10. L;11. CTA	1. 0.93583;2. 156;3. 466;4. 323;5. 170;6. 508;7. 170;8. 508;9. 412;10. Q;11. CAA	1. 0.93517;2. 163;3. 487;4. 330;5. 177;6. 529;7. 177;8. 529;9. 433;10. T;11. ACC	1. 0.91649;2. 165;3. 493;4. 332;5. 179;6. 535;7. 179;8. 535;9. 439;10. L;11. CTC	1. 0.97063;2. 190;3. 568;4. 357;5. 204;6. 610;7. 204;8. 610;9. 514;10. A;11. GCC	1. 0.94226;2. 192;3. 574;4. 375;5. 206;6. 616;7. 206;8. 616;9. 520;10. K;11. AAA	1. 0.93791;2. 205;3. 613;4. 391;5. 222;6. 664;7. 222;8. 664;9. 553;10. T;11. ACC	1. 0.91322;2. 214;3. 640;4. 400;5. 231;6. 691;7. 231;8. 691;9. 580;10. W;11. TGG	1. 0.95059;2. 215;3. 643;4. 401;5. 232;6. 694;7. 232;8. 694;9. 583;10. V;11. GTC	1. 0.93393;2. 227;3. 679;4. 413;5. 244;6. 730;7. 244;8. 730;9. 619;10. E;11. GAA	1. 0.94104;2. 236;3. 706;4. 422;5. 253;6. 757;7. 253;8. 757;9. 646;10. G;11. GGC	1. 0.95183;2. 238;3. 712;4. 424;5. 255;6. 763;7. 255;8. 763;9. 652;10. I;11. ATC	1. 0.93947;2. 246;3. 736;4. 432;5. 263;6. 787;7. 263;8. 787;9. 676;10. H;11. CAC	1. 0.96224;2. 247;3. 739;4. 433;5. 264;6. 790;7. 264;8. 790;9. 679;10. S;11. AGC	1. 0.9463;2. 251;3. 751;4. 449;5. 268;6. 802;7. 268;8. 802;9. 691;10. P;11. CCC	1. 0.94211;2. 259;3. 775;4. 457;5. 276;6. 826;7. 276;8. 826;9. 715;10. S;11. AGC	1. 0.94211;2. 262;3. 784;4. 460;5. 279;6. 835;7. 279;8. 835;9. 724;10. S;11. AGC	1. 0.93141;2. 265;3. 793;4. 463;5. 282;6. 844;7. 282;8. 844;9. 733;10. I;11. ATC
ERS451417_00015	1717.62.peg.15	NA	NA	NA	0.01914	7	Cdiphtheriae_NCTC11397,"Cpseudotuberculosis_31","Cpseudotuberculosis_ATCC19410","Crouxii_FRC0190","Csilvaticum_KL0182","Culcerans_NCTC12077","Culcerans_NCTC7910"	4.34901	0.261582	5.20122	0.326654	0.24647	4.78577	3072	3	1. 0.76515;2. 19;3. 55;4. 799;5. 53;6. 157;7. 41;8. 121;9. 52;10. T;11. ACC	1. 0.6434;2. 78;3. 232;4. 892;5. 120;6. 358;7. 123;8. 367;9. 163;10. F;11. TTT	1. 0.59729;2. 115;3. 343;4. 946;5. 157;6. 469;7. 160;8. 478;9. 274;10. A;11. GCT
ERS451417_01294	1717.62.peg.1302	NA	NA	NA	0.02157	38	Cargentoratense_DSM44202,"Catypicum_R2070","Caurimucosum_ATCC700975","Cbelfantii_FRC0043","Ccallunae_DSM20147","Ccamporealensis_DSM44610","Cdeserti_GIMN1010","Cdiphtheriae_NCTC11397","Cdoosanense_DSM45436","Cefficiens_YS314","Cepidermidicanis_DSM45586","Cfalsenii_DSM44353","Cglutamicum_ATCC13032","Cglycinophilum_AJ3170","Chalotolerans_YIM70093","Chumireducens_DSM45392","Cimitans_DSM44264","Cjeike…	0.372095	0.182596	1.63834	0.211731	0.18255	1.63945	3074	1	1. 0.99138;2. 109;3. 325;4. 136;5. 136;6. 406;7. 210;8. 628;9. 97;10. D;11. GAT
ERS451417_00309	1717.62.peg.310	NA	NA	NA	0.02342	27	Cargentoratense_DSM44202,"Catypicum_R2070","Cbelfantii_FRC0043","Ccallunae_DSM20147","Cdeserti_GIMN1010","Cdiphtheriae_NCTC11397","Cdoosanense_DSM45436","Cefficiens_YS314","Cfalsenii_DSM44353","Cglutamicum_ATCC13032","Cglycinophilum_AJ3170","Chumireducens_DSM45392","Cjeikeium_K41","Ckutscheri_DSM20755","Clactis_RW25","Cmarinum_DSM44953","Cmaris_DSM45190","Cmustelae_DSM45274","Cpseudotuberculosis_…	0.175137	0.134712	1.87629	0.134592	0.134592	1.87366	2	3	1. 0.86532;2. 306;3. 916;4. 358;5. 358;6. 1072;7. 382;8. 1144;9. 832;10. P;11. CCT	1. 0.42832;2. 349;3. 1045;4. 404;5. 404;6. 1210;7. 430;8. 1288;9. 919;10. A;11. GCA	1. 0.98811;2. 457;3. 1369;4. 521;5. 521;6. 1561;7. 550;8. 1648;9. 1219;10. R;11. CGC
ERS451417_01652	1717.62.peg.1659	NA	NA	NA	0.02693	38	Cargentoratense_DSM44202,"Catypicum_R2070","Caurimucosum_ATCC700975","Cbelfantii_FRC0043","Ccallunae_DSM20147","Ccamporealensis_DSM44610","Cdeserti_GIMN1010","Cdiphtheriae_NCTC11397","Cdoosanense_DSM45436","Cefficiens_YS314","Cepidermidicanis_DSM45586","Cfalsenii_DSM44353","Cglutamicum_ATCC13032","Cglycinophilum_AJ3170","Chalotolerans_YIM70093","Chumireducens_DSM45392","Cimitans_DSM44264","Cjeike…	0.15812	0.15812	1.48612	0.246117	0.246117	1.50966	258	0
ERS451417_00681	1717.62.peg.688	NA	NA	NA	0.04766	39	Cargentoratense_DSM44202,"Catypicum_R2070","Caurimucosum_ATCC700975","Cbelfantii_FRC0043","Ccallunae_DSM20147","Ccamporealensis_DSM44610","Cdeserti_GIMN1010","Cdiphtheriae_NCTC11397","Cdoosanense_DSM45436","Cefficiens_YS314","Cepidermidicanis_DSM45586","Cfalsenii_DSM44353","Cglutamicum_ATCC13032","Cglycinophilum_AJ3170","Chalotolerans_YIM70093","Chumireducens_DSM45392","Cimitans_DSM44264","Cjeike…	0.23911	0.136601	1.71307	0.157265	0.136601	1.71347	2	2	1. 0.98582;2. 50;3. 148;4. 51;5. 51;6. 151;7. 51;8. 151;9. 130;10. D;11. GAT	1. 0.58251;2. 149;3. 445;4. 152;5. 152;6. 454;7. 157;8. 469;9. 394;10. M;11. ATG
ERS451417_01786	1717.62.peg.1791	NA	NA	NA	0.05255	6	Cbelfantii_FRC0043,"Cdiphtheriae_NCTC11397","Cpseudotuberculosis_ATCC19410","Csilvaticum_KL0182","Culcerans_NCTC12077","Culcerans_NCTC7910"	0.543248	0.213245	2.77966	0.334298	0.214256	2.78457	2	3	1. 0.91847;2. 31;3. 91;4. 93;5. 31;6. 91;7. 31;8. 91;9. 88;10. I;11. ATC	1. 0.71467;2. 38;3. 112;4. 100;5. 38;6. 112;7. 38;8. 112;9. 109;10. V;11. GTA	1. 0.64383;2. 66;3. 196;4. 128;5. 66;6. 196;7. 67;8. 199;9. 190;10. I;11. ATC
ERS451417_00247	1717.62.peg.242	NA	NA	NA	0.05618	8	Caurimucosum_ATCC700975,"Cbelfantii_FRC0043","Cdiphtheriae_NCTC11397","Cdoosanense_DSM45436","Crouxii_FRC0190","Culcerans_NCTC12077","Culcerans_NCTC7910","Cuterequi_DSM45634"	4.95228	0.387387	2.88822	0.440519	0.440519	2.64746	4096	13	1. 0.49052;2. 7;3. 19;4. 19;5. 11;6. 31;7. 12;8. 34;9. 4;10. D;11. GAC	1. 0.52486;2. 14;3. 40;4. 26;5. 18;6. 52;7. 19;8. 55;9. 25;10. V;11. GTG	1. 0.72821;2. 28;3. 82;4. 40;5. 32;6. 94;7. 33;8. 97;9. 67;10. A;11. GCA	1. 0.40979;2. 29;3. 85;4. 41;5. 33;6. 97;7. 34;8. 100;9. 70;10. I;11. ATC	1. 0.49054;2. 37;3. 109;4. 49;5. 41;6. 121;7. 42;8. 124;9. 94;10. V;11. GTA	1. 0.63269;2. 41;3. 121;4. 53;5. 45;6. 133;7. 46;8. 136;9. 106;10. Q;11. CAA	1. 0.44393;2. 44;3. 130;4. 56;5. 48;6. 142;7. 49;8. 145;9. 115;10. L;11. CTG	1. 0.45616;2. 67;3. 199;4. 82;5. 71;6. 211;7. 72;8. 214;9. 184;10. A;11. GCG	1. 0.41994;2. 77;3. 229;4. 92;5. 81;6. 241;7. 82;8. 244;9. 214;10. E;11. GAA	1. 0.43438;2. 84;3. 250;4. 99;5. 88;6. 262;7. 89;8. 265;9. 235;10. D;11. GAT	1. 0.86569;2. 85;3. 253;4. 100;5. 89;6. 265;7. 90;8. 268;9. 238;10. G;11. GGC	1. 0.95671;2. 91;3. 271;4. 109;5. 95;6. 283;7. 96;8. 286;9. 256;10. T;11. ACC	1. 0.47558;2. 95;3. 283;4. 113;5. 99;6. 295;7. 100;8. 298;9. 268;10. R;11. CGA
ERS451417_00520	1717.62.peg.524	NA	NA	NA	0.06221	7	Cbelfantii_FRC0043,"Cdiphtheriae_NCTC11397","Cpseudotuberculosis_31","Cpseudotuberculosis_ATCC19410","Csilvaticum_KL0182","Culcerans_NCTC12077","Culcerans_NCTC7910"	0.315442	0.266188	2.93867	0.269432	0.269432	2.92861	2	11	1. 0.41007;2. 48;3. 142;4. 62;5. 62;6. 184;7. 70;8. 208;9. 100;10. L;11. CTG	1. 0.45013;2. 65;3. 193;4. 79;5. 79;6. 235;7. 87;8. 259;9. 151;10. L;11. CTC	1. 0.4031;2. 101;3. 301;4. 118;5. 118;6. 352;7. 126;8. 376;9. 253;10. N;11. AAT	1. 0.42264;2. 105;3. 313;4. 122;5. 122;6. 364;7. 130;8. 388;9. 265;10. T;11. ACT	1. 0.43407;2. 135;3. 403;4. 152;5. 152;6. 454;7. 160;8. 478;9. 349;10. L;11. CTC	1. 0.46578;2. 172;3. 514;4. 189;5. 189;6. 565;7. 197;8. 589;9. 460;10. V;11. GTC	1. 0.44744;2. 332;3. 994;4. 350;5. 349;6. 1045;7. 359;8. 1075;9. 922;10. A;11. GCC	1. 0.44808;2. 385;3. 1153;4. 404;5. 403;6. 1207;7. 413;8. 1237;9. 1081;10. H;11. CAC	1. 0.45014;2. 512;3. 1534;4. 535;5. 534;6. 1600;7. 544;8. 1630;9. 1456;10. L;11. CTC	1. 0.42393;2. 583;3. 1747;4. 614;5. 613;6. 1837;7. 623;8. 1867;9. 1663;10. L;11. CTC	1. 0.90498;2. 763;3. 2287;4. 799;5. 795;6. 2383;7. 805;8. 2413;9. 2200;10. E;11. GAA
ERS451417_00317	1717.62.peg.319	NA	NA	NA	0.06759	39	Cargentoratense_DSM44202,"Catypicum_R2070","Caurimucosum_ATCC700975","Cbelfantii_FRC0043","Ccallunae_DSM20147","Ccamporealensis_DSM44610","Cdeserti_GIMN1010","Cdiphtheriae_NCTC11397","Cdoosanense_DSM45436","Cefficiens_YS314","Cepidermidicanis_DSM45586","Cfalsenii_DSM44353","Cglutamicum_ATCC13032","Cglycinophilum_AJ3170","Chalotolerans_YIM70093","Chumireducens_DSM45392","Cimitans_DSM44264","Cjeike…	5.45903	0.165211	1.58022	0.178648	0.169489	1.59184	3072	1	1. 0.53065;2. 230;3. 688;4. 266;5. 266;6. 796;7. 302;8. 904;9. 526;10. A;11. GCA
ERS451417_02177	1717.62.peg.2203	NA	NA	NA	0.07344	6	Cdiphtheriae_NCTC11397,"Cpseudotuberculosis_31","Cpseudotuberculosis_ATCC19410","Csilvaticum_KL0182","Culcerans_NCTC12077","Culcerans_NCTC7910"	0.326803	0.15764	2.86404	0.16481	0.16481	2.86899	2	1	1. 0.85788;2. 82;3. 244;4. 89;5. 86;6. 256;7. 86;8. 256;9. 202;10. I;11. ATT
ERS451417_01581	1717.62.peg.1590	NA	NA	NA	0.08967	29	Catypicum_R2070,"Caurimucosum_ATCC700975","Cbelfantii_FRC0043","Ccallunae_DSM20147","Ccamporealensis_DSM44610","Cdeserti_GIMN1010","Cdiphtheriae_NCTC11397","Cdoosanense_DSM45436","Cefficiens_YS314","Cepidermidicanis_DSM45586","Cglutamicum_ATCC13032","Chalotolerans_YIM70093","Chumireducens_DSM45392","Ckutscheri_DSM20755","Cmarinum_DSM44953","Cmaris_DSM45190","Cmustelae_DSM45274","Cpseudotuberculos…	0.32957	0.220131	1.63123	0.238551	0.22132	1.63389	3074	2	1. 0.4329;2. 21;3. 61;4. 48;5. 29;6. 85;7. 31;8. 91;9. 31;10. L;11. CTA	1. 0.48393;2. 116;3. 346;4. 201;5. 129;6. 385;7. 133;8. 397;9. 271;10. M;11. ATG
ERS451417_00996	1717.62.peg.1007	NA	NA	NA	0.1102	13	Cargentoratense_DSM44202,"Cbelfantii_FRC0043","Cdiphtheriae_NCTC11397","Cepidermidicanis_DSM45586","Ckroppenstedtii_DSM44385","Ckutscheri_DSM20755","Clactis_RW25","Cmustelae_DSM45274","Cpseudotuberculosis_31","Cpseudotuberculosis_ATCC19410","Crouxii_FRC0190","Culcerans_NCTC12077","Culcerans_NCTC7910"	0.291814	0.156109	2.39362	0.188001	0.155311	2.39271	7170	3	1. 0.9816;2. 194;3. 580;4. 236;5. 234;6. 700;7. 294;8. 880;9. 388;10. D;11. GAT	1. 0.68103;2. 244;3. 730;4. 296;5. 294;6. 880;7. 354;8. 1060;9. 493;10. A;11. GCT	1. 0.53152;2. 337;3. 1009;4. 393;5. 387;6. 1159;7. 447;8. 1339;9. 772;10. I;11. ATC
ERS451417_00975	1717.62.peg.985	NA	NA	NA	0.117	36	Cargentoratense_DSM44202,"Catypicum_R2070","Caurimucosum_ATCC700975","Cbelfantii_FRC0043","Ccallunae_DSM20147","Ccamporealensis_DSM44610","Cdeserti_GIMN1010","Cdiphtheriae_NCTC11397","Cdoosanense_DSM45436","Cefficiens_YS314","Cepidermidicanis_DSM45586","Cfalsenii_DSM44353","Cglutamicum_ATCC13032","Chalotolerans_YIM70093","Chumireducens_DSM45392","Cimitans_DSM44264","Cjeikeium_K41","Ckroppenstedti…	0.559957	0.205717	1.70569	0.225996	0.205484	1.70539	2050	5	1. 0.95697;2. 255;3. 763;4. 275;5. 275;6. 823;7. 345;8. 1033;9. 445;10. E;11. GAG	1. 0.4715;2. 256;3. 766;4. 276;5. 276;6. 826;7. 346;8. 1036;9. 448;10. I;11. ATT	1. 0.54601;2. 550;3. 1648;4. 570;5. 570;6. 1708;7. 640;8. 1918;9. 1276;10. L;11. CTC	1. 0.46909;2. 593;3. 1777;4. 613;5. 613;6. 1837;7. 683;8. 2047;9. 1405;10. I;11. ATC	1. 0.46833;2. 597;3. 1789;4. 617;5. 617;6. 1849;7. 687;8. 2059;9. 1417;10. V;11. GTC
ERS451417_01573	1717.62.peg.1582	NA	NA	NA	0.1561	38	Cargentoratense_DSM44202,"Catypicum_R2070","Caurimucosum_ATCC700975","Cbelfantii_FRC0043","Ccallunae_DSM20147","Ccamporealensis_DSM44610","Cdeserti_GIMN1010","Cdiphtheriae_NCTC11397","Cdoosanense_DSM45436","Cefficiens_YS314","Cepidermidicanis_DSM45586","Cfalsenii_DSM44353","Cglutamicum_ATCC13032","Cglycinophilum_AJ3170","Chalotolerans_YIM70093","Chumireducens_DSM45392","Cimitans_DSM44264","Cjeike…	0.281066	0.236511	1.58974	0.246264	0.236517	1.58832	3074	1	1. 0.97415;2. 69;3. 205;4. 81;5. 81;6. 241;7. 182;8. 544;9. 94;10. T;11. ACT
ERS451417_02242	1717.62.peg.2268	NA	NA	NA	0.2076	4	Cdiphtheriae_NCTC11397,"Cepidermidicanis_DSM45586","Culcerans_NCTC12077","Culcerans_NCTC7910"	8.71037	0.136739	2.18757	0.343723	0.13567	2.06189	6144	7	1. 0.95807;2. 52;3. 154;4. 56;5. 53;6. 157;7. 53;8. 157;9. 154;10. S;11. TCG	1. 0.92762;2. 68;3. 202;4. 72;5. 69;6. 205;7. 77;8. 229;9. 196;10. Q;11. CAG	1. 0.94855;2. 74;3. 220;4. 78;5. 75;6. 223;7. 83;8. 247;9. 214;10. R;11. CGC	1. 0.93614;2. 103;3. 307;4. 109;5. 106;6. 316;7. 114;8. 340;9. 256;10. Y;11. TAC	1. 0.94437;2. 104;3. 310;4. 110;5. 107;6. 319;7. 115;8. 343;9. 259;10. N;11. AAC	1. 0.96606;2. 110;3. 328;4. 116;5. 113;6. 337;7. 121;8. 361;9. 277;10. Y;11. TAC	1. 0.90305;2. 117;3. 349;4. 123;5. 120;6. 358;7. 128;8. 382;9. 298;10. G;11. GGC
ERS451417_02052	1717.62.peg.2064	NA	NA	NA	0.234	15	Cbelfantii_FRC0043,"Ccallunae_DSM20147","Cdeserti_GIMN1010","Cdiphtheriae_NCTC11397","Cefficiens_YS314","Cglutamicum_ATCC13032","Chalotolerans_YIM70093","Cmustelae_DSM45274","Cpseudotuberculosis_31","Cpseudotuberculosis_ATCC19410","Csilvaticum_KL0182","Ctestudinoris_DSM44614","Culcerans_NCTC12077","Culcerans_NCTC7910","Cvitaeruminis_DSM20294"	0.226104	0.0790295	1.69741	0.120359	0.078634	1.70586	2	4	1. 0.43308;2. 57;3. 169;4. 87;5. 63;6. 187;7. 65;8. 193;9. 112;10. I;11. ATC	1. 0.98027;2. 112;3. 334;4. 143;5. 119;6. 355;7. 121;8. 361;9. 277;10. G;11. GGC	1. 0.67067;2. 115;3. 343;4. 146;5. 122;6. 364;7. 124;8. 370;9. 286;10. V;11. GTG	1. 0.43876;2. 234;3. 700;4. 279;5. 245;6. 733;7. 247;8. 739;9. 625;10. V;11. GTG
ERS451417_01989	1717.62.peg.1990	NA	NA	NA	0.2393	7	Cbelfantii_FRC0043,"Cdiphtheriae_NCTC11397","Cpseudotuberculosis_31","Cpseudotuberculosis_ATCC19410","Csilvaticum_KL0182","Culcerans_NCTC12077","Culcerans_NCTC7910"	0.154541	0.0896435	3.27961	0.124103	0.088945	3.27361	2	2	1. 0.97734;2. 30;3. 88;4. 62;5. 62;6. 184;7. 62;8. 184;9. 85;10. D;11. GAT	1. 0.53515;2. 191;3. 571;4. 234;5. 223;6. 667;7. 223;8. 667;9. 568;10. I;11. ATC
ERS451417_01498	1717.62.peg.1506	NA	NA	NA	0.275	34	Cargentoratense_DSM44202,"Catypicum_R2070","Caurimucosum_ATCC700975","Cbelfantii_FRC0043","Ccallunae_DSM20147","Ccamporealensis_DSM44610","Cdeserti_GIMN1010","Cdiphtheriae_NCTC11397","Cdoosanense_DSM45436","Cefficiens_YS314","Cepidermidicanis_DSM45586","Cglutamicum_ATCC13032","Cglycinophilum_AJ3170","Chalotolerans_YIM70093","Chumireducens_DSM45392","Cimitans_DSM44264","Cjeikeium_K41","Ckutscheri_…	0.26481	0.202191	1.74881	0.207152	0.202045	1.74734	1026	2	1. 0.87303;2. 57;3. 169;4. 108;5. 108;6. 322;7. 126;8. 376;9. 124;10. R;11. CGC	1. 0.54423;2. 125;3. 373;4. 176;5. 176;6. 526;7. 194;8. 580;9. 328;10. E;11. GAA
ERS451417_01977	1717.62.peg.1977	NA	NA	NA	0.2758	38	Cargentoratense_DSM44202,"Catypicum_R2070","Caurimucosum_ATCC700975","Cbelfantii_FRC0043","Ccallunae_DSM20147","Ccamporealensis_DSM44610","Cdeserti_GIMN1010","Cdiphtheriae_NCTC11397","Cdoosanense_DSM45436","Cefficiens_YS314","Cepidermidicanis_DSM45586","Cfalsenii_DSM44353","Cglutamicum_ATCC13032","Cglycinophilum_AJ3170","Chalotolerans_YIM70093","Chumireducens_DSM45392","Cimitans_DSM44264","Cjeike…	0.195348	0.101034	2.20155	0.115919	0.10107	2.20245	3074	1	1. 0.83312;2. 134;3. 400;4. 134;5. 134;6. 400;7. 134;8. 400;9. 397;10. V;11. GTG
ERS451417_02402	1717.62.peg.2434	NA	NA	NA	0.2792	35	Cargentoratense_DSM44202,"Catypicum_R2070","Caurimucosum_ATCC700975","Cbelfantii_FRC0043","Ccallunae_DSM20147","Ccamporealensis_DSM44610","Cdeserti_GIMN1010","Cdiphtheriae_NCTC11397","Cefficiens_YS314","Cepidermidicanis_DSM45586","Cfalsenii_DSM44353","Cglutamicum_ATCC13032","Cglycinophilum_AJ3170","Chalotolerans_YIM70093","Chumireducens_DSM45392","Cimitans_DSM44264","Cjeikeium_K41","Ckroppenstedt…	0.106226	0.106226	1.64778	0.745332	0.10603	1.64824	3330	0
ERS451417_00830	1717.62.peg.834	NA	NA	NA	0.2973	9	Cbelfantii_FRC0043,"Cdiphtheriae_NCTC11397","Ckutscheri_DSM20755","Cpseudotuberculosis_31","Cpseudotuberculosis_ATCC19410","Crouxii_FRC0190","Culcerans_NCTC12077","Culcerans_NCTC7910","Cvitaeruminis_DSM20294"	13.3485	0.133621	2.2087	0.151233	0.134676	2.21377	6144	2	1. 0.61343;2. 46;3. 136;4. 73;5. 46;6. 136;7. 57;8. 169;9. 31;10. L;11. TTG	1. 0.94511;2. 92;3. 274;4. 123;5. 92;6. 274;7. 103;8. 307;9. 169;10. S;11. TCC
ERS451417_01236	1717.62.peg.1244	NA	NA	NA	0.3202	13	Cbelfantii_FRC0043,"Cdiphtheriae_NCTC11397","Cepidermidicanis_DSM45586","Ckroppenstedtii_DSM44385","Ckutscheri_DSM20755","Cmustelae_DSM45274","Cpseudotuberculosis_31","Cpseudotuberculosis_ATCC19410","Crouxii_FRC0190","Csilvaticum_KL0182","Culcerans_NCTC12077","Culcerans_NCTC7910","Cvitaeruminis_DSM20294"	0.298865	0.198864	1.70592	0.263027	0.200282	1.70553	2050	6	1. 0.97729;2. 52;3. 154;4. 99;5. 91;6. 271;7. 127;8. 379;9. 64;10. T;11. ACA	1. 0.89419;2. 193;3. 577;4. 249;5. 232;6. 694;7. 268;8. 802;9. 487;10. E;11. GAA	1. 0.54242;2. 194;3. 580;4. 250;5. 233;6. 697;7. 269;8. 805;9. 490;10. V;11. GTA	1. 0.4987;2. 256;3. 766;4. 324;5. 298;6. 892;7. 344;8. 1030;9. 577;10. V;11. GTC	1. 0.45386;2. 354;3. 1060;4. 440;5. 396;6. 1186;7. 451;8. 1351;9. 790;10. E;11. GAG	1. 0.61197;2. 377;3. 1129;4. 463;5. 419;6. 1255;7. 474;8. 1420;9. 859;10. Q;11. CAA
ERS451417_01999	1717.62.peg.2003	NA	NA	NA	0.3221	7	Cbelfantii_FRC0043,"Cdiphtheriae_NCTC11397","Cpseudotuberculosis_31","Cpseudotuberculosis_ATCC19410","Csilvaticum_KL0182","Culcerans_NCTC12077","Culcerans_NCTC7910"	0.459663	0.319711	4.3642	0.321131	0.321131	4.35028	2	5	1. 0.42019;2. 501;3. 1501;4. 501;5. 501;6. 1501;7. 501;8. 1501;9. 1501;10. V;11. GTG	1. 0.42524;2. 594;3. 1780;4. 594;5. 594;6. 1780;7. 594;8. 1780;9. 1780;10. E;11. GAG	1. 0.65514;2. 745;3. 2233;4. 745;5. 745;6. 2233;7. 745;8. 2233;9. 2233;10. V;11. GTG	1. 0.58061;2. 751;3. 2251;4. 751;5. 751;6. 2251;7. 751;8. 2251;9. 2251;10. L;11. CTC	1. 0.43362;2. 836;3. 2506;4. 836;5. 836;6. 2506;7. 836;8. 2506;9. 2506;10. F;11. TTT
ERS451417_02025	1717.62.peg.2030	NA	NA	NA	0.3575	29	Caurimucosum_ATCC700975,"Cbelfantii_FRC0043","Ccallunae_DSM20147","Ccamporealensis_DSM44610","Cdeserti_GIMN1010","Cdiphtheriae_NCTC11397","Cdoosanense_DSM45436","Cefficiens_YS314","Cepidermidicanis_DSM45586","Cfalsenii_DSM44353","Cglutamicum_ATCC13032","Chalotolerans_YIM70093","Chumireducens_DSM45392","Cjeikeium_K41","Clactis_RW25","Cmarinum_DSM44953","Cmaris_DSM45190","Cmustelae_DSM45274","Cpseu…	0.161183	0.149183	2.06005	0.149376	0.149376	2.05969	7170	4	1. 0.40193;2. 509;3. 1525;4. 1073;5. 580;6. 1738;7. 769;8. 2305;9. 1105;10. V;11. GTT	1. 0.47948;2. 638;3. 1912;4. 1276;5. 736;6. 2206;7. 1004;8. 3010;9. 1333;10. R;11. CGG	1. 0.51346;2. 640;3. 1918;4. 1278;5. 738;6. 2212;7. 1006;8. 3016;9. 1339;10. P;11. CCG	1. 0.90627;2. 817;3. 2449;4. 1561;5. 919;6. 2755;7. 1188;8. 3562;9. 1849;10. V;11. GTG
ERS451417_02343	1717.62.peg.2371	NA	NA	NA	0.3794	7	Cbelfantii_FRC0043,"Ccamporealensis_DSM44610","Cdiphtheriae_NCTC11397","Csingulare_IBSB52218","Culcerans_NCTC12077","Culcerans_NCTC7910","Curealyticum_DSM7109"	5.21039	0.247173	2.14252	0.269855	0.243339	2.12049	4096	4	1. 0.82011;2. 119;3. 355;4. 125;5. 123;6. 367;7. 123;8. 367;9. 292;10. D;11. GAC	1. 0.46482;2. 156;3. 466;4. 162;5. 160;6. 478;7. 160;8. 478;9. 403;10. G;11. GGG	1. 0.79661;2. 211;3. 631;4. 218;5. 215;6. 643;7. 215;8. 643;9. 562;10. F;11. TTT	1. 0.9496;2. 274;3. 820;4. 281;5. 278;6. 832;7. 278;8. 832;9. 751;10. R;11. CGC
ERS451417_00575	1717.62.peg.578	NA	NA	NA	0.3801	39	Cargentoratense_DSM44202,"Catypicum_R2070","Caurimucosum_ATCC700975","Cbelfantii_FRC0043","Ccallunae_DSM20147","Ccamporealensis_DSM44610","Cdeserti_GIMN1010","Cdiphtheriae_NCTC11397","Cdoosanense_DSM45436","Cefficiens_YS314","Cepidermidicanis_DSM45586","Cfalsenii_DSM44353","Cglutamicum_ATCC13032","Cglycinophilum_AJ3170","Chalotolerans_YIM70093","Chumireducens_DSM45392","Cimitans_DSM44264","Cjeike…	0.196708	0.1268	2.27941	0.149261	0.126779	2.2786	2	2	1. 0.64142;2. 27;3. 79;4. 27;5. 27;6. 79;7. 36;8. 106;9. 49;10. N;11. AAC	1. 0.82053;2. 49;3. 145;4. 49;5. 49;6. 145;7. 58;8. 172;9. 115;10. D;11. GAT
ERS451417_00040	1717.62.peg.36	NA	NA	NA	0.3921	14	Caurimucosum_ATCC700975,"Cbelfantii_FRC0043","Cdiphtheriae_NCTC11397","Cepidermidicanis_DSM45586","Cfalsenii_DSM44353","Cjeikeium_K41","CriegeliiPUDD83A45","Crouxii_FRC0190","Csimulans_PES1","Csingulare_IBSB52218","Culcerans_NCTC12077","Culcerans_NCTC7910","Cureicelerivorans_IMMIBRIV2301","Cvitaeruminis_DSM20294"	0.438358	0.255518	2.30888	0.263377	0.255325	2.30954	7170	1	1. 0.92216;2. 110;3. 328;4. 351;5. 133;6. 397;7. 142;8. 424;9. 280;10. A;11. GCC
ERS451417_01684	1717.62.peg.1691	NA	NA	NA	0.4145	9	Cbelfantii_FRC0043,"Cdiphtheriae_NCTC11397","Ckutscheri_DSM20755","Cpseudotuberculosis_31","Cpseudotuberculosis_ATCC19410","Csilvaticum_KL0182","Culcerans_NCTC12077","Culcerans_NCTC7910","Cvitaeruminis_DSM20294"	0.243393	0.214037	2.83535	0.216184	0.216069	2.82088	2	5	1. 0.42424;2. 112;3. 334;4. 154;5. 134;6. 400;7. 164;8. 490;9. 157;10. I;11. ATT	1. 0.42071;2. 130;3. 388;4. 172;5. 152;6. 454;7. 182;8. 544;9. 211;10. V;11. GTG	1. 0.43848;2. 152;3. 454;4. 194;5. 174;6. 520;7. 204;8. 610;9. 277;10. A;11. GCA	1. 0.42766;2. 289;3. 865;4. 360;5. 311;6. 931;7. 341;8. 1021;9. 688;10. V;11. GTT	1. 0.47227;2. 353;3. 1057;4. 429;5. 375;6. 1123;7. 405;8. 1213;9. 880;10. L;11. CTT
ERS451417_01985	1717.62.peg.1985	NA	NA	NA	0.4155	13	Catypicum_R2070,"Caurimucosum_ATCC700975","Cbelfantii_FRC0043","Cdiphtheriae_NCTC11397","Cimitans_DSM44264","Ckutscheri_DSM20755","Cpseudotuberculosis_ATCC19410","Csilvaticum_KL0182","Csimulans_PES1","Csingulare_IBSB52218","Culcerans_NCTC12077","Culcerans_NCTC7910","Cvitaeruminis_DSM20294"	0.184264	0.155136	2.48164	0.156046	0.156046	2.4839	2	2	1. 0.50034;2. 41;3. 121;4. 58;5. 58;6. 172;7. 69;8. 205;9. 118;10. V;11. GTC	1. 0.77715;2. 270;3. 808;4. 292;5. 291;6. 871;7. 316;8. 946;9. 694;10. I;11. ATC
ERS451417_00215	1717.62.peg.212	NA	NA	NA	0.4805	11	Cbelfantii_FRC0043,"Ccallunae_DSM20147","Cdiphtheriae_NCTC11397","Ckutscheri_DSM20755","Cmustelae_DSM45274","Cpseudotuberculosis_ATCC19410","Crouxii_FRC0190","Csilvaticum_KL0182","Culcerans_NCTC12077","Culcerans_NCTC7910","Cvitaeruminis_DSM20294"	0.423246	0.0744453	2.37257	0.156697	0.0748591	2.3774	2	1	1. 0.77044;2. 6;3. 16;4. 36;5. 7;6. 19;7. 7;8. 19;9. 16;10. I;11. ATT
ERS451417_00923	1717.62.peg.930	NA	NA	NA	0.7395	5	Cbelfantii_FRC0043,"Cdiphtheriae_NCTC11397","Crouxii_FRC0190","Culcerans_NCTC12077","Culcerans_NCTC7910"	0.439454	0.167335	2.31426	0.271706	0.168529	2.30481	4098	17	1. 0.44865;2. 2;3. 4;4. 17;5. 2;6. 4;7. 2;8. 4;9. 1;10. E;11. GAA	1. 0.51622;2. 17;3. 49;4. 32;5. 17;6. 49;7. 17;8. 49;9. 46;10. A;11. GCC	1. 0.69385;2. 21;3. 61;4. 36;5. 21;6. 61;7. 21;8. 61;9. 58;10. T;11. ACA	1. 0.57967;2. 37;3. 109;4. 53;5. 37;6. 109;7. 37;8. 109;9. 106;10. G;11. GGG	1. 0.62184;2. 45;3. 133;4. 63;5. 45;6. 133;7. 45;8. 133;9. 130;10. T;11. ACC	1. 0.55322;2. 49;3. 145;4. 67;5. 49;6. 145;7. 49;8. 145;9. 142;10. V;11. GTT	1. 0.7104;2. 55;3. 163;4. 73;5. 55;6. 163;7. 55;8. 163;9. 160;10. V;11. GTA	1. 0.62626;2. 56;3. 166;4. 74;5. 56;6. 166;7. 56;8. 166;9. 163;10. S;11. AGC	1. 0.66173;2. 58;3. 172;4. 76;5. 58;6. 172;7. 58;8. 172;9. 169;10. S;11. AGC	1. 0.61537;2. 65;3. 193;4. 83;5. 65;6. 193;7. 65;8. 193;9. 190;10. D;11. GAC	1. 0.46915;2. 71;3. 211;4. 89;5. 71;6. 211;7. 71;8. 211;9. 208;10. D;11. GAC	1. 0.62979;2. 104;3. 310;4. 122;5. 104;6. 310;7. 104;8. 310;9. 307;10. H;11. CAC	1. 0.62059;2. 107;3. 319;4. 125;5. 107;6. 319;7. 107;8. 319;9. 316;10. K;11. AAG	1. 0.77999;2. 117;3. 349;4. 135;5. 117;6. 349;7. 117;8. 349;9. 346;10. P;11. CCC	1. 0.72697;2. 122;3. 364;4. 152;5. 122;6. 364;7. 122;8. 364;9. 361;10. D;11. GAC	1. 0.78329;2. 128;3. 382;4. 158;5. 128;6. 382;7. 128;8. 382;9. 379;10. S;11. TCC	1. 0.71789;2. 130;3. 388;4. 160;5. 130;6. 388;7. 130;8. 388;9. 385;10. P;11. CCA
ERS451417_00070	1717.62.peg.66	NA	NA	NA	0.7465	10	Cbelfantii_FRC0043,"Cdiphtheriae_NCTC11397","Cepidermidicanis_DSM45586","Ckutscheri_DSM20755","Cpseudotuberculosis_31","Cpseudotuberculosis_ATCC19410","Crouxii_FRC0190","Csilvaticum_KL0182","Culcerans_NCTC12077","Culcerans_NCTC7910"	0.357451	0.357451	4.79209	0.361343	0.356788	4.68685	258	0
ERS451417_01948	1717.62.peg.1948	NA	NA	NA	0.8433	38	Cargentoratense_DSM44202,"Catypicum_R2070","Caurimucosum_ATCC700975","Cbelfantii_FRC0043","Ccallunae_DSM20147","Ccamporealensis_DSM44610","Cdeserti_GIMN1010","Cdiphtheriae_NCTC11397","Cdoosanense_DSM45436","Cefficiens_YS314","Cepidermidicanis_DSM45586","Cfalsenii_DSM44353","Cglutamicum_ATCC13032","Cglycinophilum_AJ3170","Chalotolerans_YIM70093","Chumireducens_DSM45392","Cimitans_DSM44264","Cjeike…	0.156807	0.149625	1.57414	0.154012	0.14954	1.5742	3074	6	1. 0.50516;2. 16;3. 46;4. 44;5. 44;6. 130;7. 140;8. 418;9. 13;10. P;11. CCT	1. 0.72935;2. 18;3. 52;4. 46;5. 46;6. 136;7. 142;8. 424;9. 19;10. T;11. ACT	1. 0.45416;2. 27;3. 79;4. 55;5. 55;6. 163;7. 151;8. 451;9. 46;10. V;11. GTG	1. 0.51722;2. 39;3. 115;4. 67;5. 67;6. 199;7. 163;8. 487;9. 82;10. P;11. CCG	1. 0.45428;2. 510;3. 1528;4. 601;5. 601;6. 1801;7. 786;8. 2356;9. 1129;10. V;11. GTG	1. 0.49718;2. 569;3. 1705;4. 660;5. 660;6. 1978;7. 845;8. 2533;9. 1306;10. V;11. GTG
ERS451417_01260	1717.62.peg.1268	NA	NA	NA	0.8563	4	Cdiphtheriae_NCTC11397,"Csilvaticum_KL0182","Culcerans_NCTC12077","Culcerans_NCTC7910"	0.452432	0.426069	2.11288	0.443277	0.425688	2.06634	2	1	1. 0.62156;2. 120;3. 358;4. 183;5. 126;6. 376;7. 129;8. 385;9. 295;10. S;11. AGT
ERS451417_01678	1717.62.peg.1685	NA	NA	NA	0.8663	6	Cbelfantii_FRC0043,"Cdiphtheriae_NCTC11397","Cpseudotuberculosis_31","Cpseudotuberculosis_ATCC19410","Culcerans_NCTC12077","Culcerans_NCTC7910"	0.101869	0.101869	2.03007	0.102393	0.0992547	2.01434	6146	1	1. 0.41964;2. 5;3. 13;4. 16;5. 5;6. 13;7. 5;8. 13;9. 13;10. L;11. CTA
ERS451417_01961	1717.62.peg.1961	NA	NA	NA	0.8703	6	Cbelfantii_FRC0043,"Cdiphtheriae_NCTC11397","Cpseudotuberculosis_31","Cpseudotuberculosis_ATCC19410","Culcerans_NCTC12077","Culcerans_NCTC7910"	0.168971	0.156005	2.17808	0.158645	0.158645	2.17122	4098	3	1. 0.53133;2. 32;3. 94;4. 35;5. 32;6. 94;7. 32;8. 94;9. 91;10. T;11. ACG	1. 0.41646;2. 47;3. 139;4. 50;5. 47;6. 139;7. 47;8. 139;9. 136;10. S;11. TCC	1. 0.60196;2. 114;3. 340;4. 119;5. 114;6. 340;7. 114;8. 340;9. 337;10. R;11. CGC
ERS451417_00123	1717.62.peg.121	NA	NA	NA	0.9361	11	Cbelfantii_FRC0043,"Cdiphtheriae_NCTC11397","Chumireducens_DSM45392","Cmarinum_DSM44953","Cpseudotuberculosis_31","Cpseudotuberculosis_ATCC19410","Crouxii_FRC0190","Csilvaticum_KL0182","Ctestudinoris_DSM44614","Culcerans_NCTC12077","Culcerans_NCTC7910"	0.130447	0.126589	1.96947	0.127266	0.127266	1.96691	2050	5	1. 0.49985;2. 34;3. 100;4. 65;5. 42;6. 124;7. 47;8. 139;9. 10;10. Y;11. TAC	1. 0.47472;2. 41;3. 121;4. 72;5. 49;6. 145;7. 54;8. 160;9. 31;10. A;11. GCA	1. 0.46243;2. 167;3. 499;4. 217;5. 178;6. 532;7. 184;8. 550;9. 361;10. S;11. AGC	1. 0.46225;2. 250;3. 748;4. 311;5. 261;6. 781;7. 267;8. 799;9. 610;10. I;11. ATC	1. 0.49581;2. 271;3. 811;4. 332;5. 282;6. 844;7. 288;8. 862;9. 673;10. K;11. AAA
ERS451417_00063	1717.62.peg.59	NA	NA	NA	0.9476	12	Cbelfantii_FRC0043,"Cdiphtheriae_NCTC11397","Cefficiens_YS314","Cimitans_DSM44264","Crouxii_FRC0190","Csimulans_PES1","Csingulare_IBSB52218","Ctestudinoris_DSM44614","Culcerans_NCTC12077","Culcerans_NCTC7910","Cureicelerivorans_IMMIBRIV2301","Cuterequi_DSM45634"	0.305303	0.192658	2.65759	0.29901	0.192642	2.6572	7170	5	1. 0.79415;2. 49;3. 145;4. 89;5. 73;6. 217;7. 98;8. 292;9. 58;10. I;11. ATT	1. 0.97269;2. 71;3. 211;4. 122;5. 103;6. 307;7. 129;8. 385;9. 94;10. S;11. TCT	1. 0.60308;2. 101;3. 301;4. 152;5. 133;6. 397;7. 159;8. 475;9. 184;10. A;11. GCT	1. 0.91408;2. 194;3. 580;4. 246;5. 226;6. 676;7. 252;8. 754;9. 457;10. A;11. GCC	1. 0.86736;2. 204;3. 610;4. 256;5. 236;6. 706;7. 262;8. 784;9. 487;10. L;11. CTC
ERS451417_01807	1717.62.peg.1813	NA	NA	NA	0.9543	38	Cargentoratense_DSM44202,"Catypicum_R2070","Caurimucosum_ATCC700975","Cbelfantii_FRC0043","Ccallunae_DSM20147","Ccamporealensis_DSM44610","Cdeserti_GIMN1010","Cdiphtheriae_NCTC11397","Cdoosanense_DSM45436","Cefficiens_YS314","Cepidermidicanis_DSM45586","Cfalsenii_DSM44353","Cglutamicum_ATCC13032","Cglycinophilum_AJ3170","Chalotolerans_YIM70093","Chumireducens_DSM45392","Cimitans_DSM44264","Cjeike…	0.0802115	0.0802115	1.5901	0.0802599	0.0802015	1.59021	258	0
ERS451417_00505	1717.62.peg.509	NA	NA	NA	0.9584	8	Cbelfantii_FRC0043,"Cdiphtheriae_NCTC11397","Cpseudotuberculosis_31","Cpseudotuberculosis_ATCC19410","Crouxii_FRC0190","Csilvaticum_KL0182","Culcerans_NCTC12077","Culcerans_NCTC7910"	0.0718519	0.0709522	3.72456	0.0709624	0.0709624	3.73244	2	1	1. 0.60272;2. 48;3. 142;4. 55;5. 48;6. 142;7. 48;8. 142;9. 142;10. S;11. AGC
ERS451417_02262	1717.62.peg.2291	NA	NA	NA	0.9624	38	Cargentoratense_DSM44202,"Catypicum_R2070","Caurimucosum_ATCC700975","Cbelfantii_FRC0043","Ccallunae_DSM20147","Ccamporealensis_DSM44610","Cdeserti_GIMN1010","Cdiphtheriae_NCTC11397","Cdoosanense_DSM45436","Cefficiens_YS314","Cepidermidicanis_DSM45586","Cfalsenii_DSM44353","Cglutamicum_ATCC13032","Cglycinophilum_AJ3170","Chalotolerans_YIM70093","Chumireducens_DSM45392","Cimitans_DSM44264","Cjeike…	0.160432	0.160432	1.71769	0.160441	0.160422	1.71769	258	0
ERS451417_00788	1717.62.peg.795	NA	NA	NA	0.9743	20	Cbelfantii_FRC0043,"Ccallunae_DSM20147","Cdeserti_GIMN1010","Cdiphtheriae_NCTC11397","Cefficiens_YS314","Cepidermidicanis_DSM45586","Cfalsenii_DSM44353","Cglutamicum_ATCC13032","Cglycinophilum_AJ3170","Cjeikeium_K41","Ckroppenstedtii_DSM44385","Clactis_RW25","Cmustelae_DSM45274","Cpseudotuberculosis_31","Cpseudotuberculosis_ATCC19410","Crouxii_FRC0190","Csilvaticum_KL0182","Cterpenotabidum_Y11","…	0.12825	0.127163	2.44816	0.127172	0.127163	2.44797	3074	1	1. 0.6482;2. 84;3. 250;4. 94;5. 94;6. 280;7. 119;8. 355;9. 208;10. V;11. GTC
ERS451417_00704	1717.62.peg.709	NA	NA	NA	0.979	38	Cargentoratense_DSM44202,"Catypicum_R2070","Caurimucosum_ATCC700975","Cbelfantii_FRC0043","Ccallunae_DSM20147","Ccamporealensis_DSM44610","Cdeserti_GIMN1010","Cdiphtheriae_NCTC11397","Cdoosanense_DSM45436","Cefficiens_YS314","Cepidermidicanis_DSM45586","Cfalsenii_DSM44353","Cglutamicum_ATCC13032","Cglycinophilum_AJ3170","Chalotolerans_YIM70093","Chumireducens_DSM45392","Cimitans_DSM44264","Cjeike…	0.120438	0.120438	2.00393	0.128879	0.120438	2.00402	1282	0
ERS451417_01015	1717.62.peg.1026	NA	NA	NA	0.9845	39	Cargentoratense_DSM44202,"Catypicum_R2070","Caurimucosum_ATCC700975","Cbelfantii_FRC0043","Ccallunae_DSM20147","Ccamporealensis_DSM44610","Cdeserti_GIMN1010","Cdiphtheriae_NCTC11397","Cdoosanense_DSM45436","Cefficiens_YS314","Cepidermidicanis_DSM45586","Cfalsenii_DSM44353","Cglutamicum_ATCC13032","Cglycinophilum_AJ3170","Chalotolerans_YIM70093","Chumireducens_DSM45392","Cimitans_DSM44264","Cjeike…	0.11601	0.115991	1.70758	0.242574	0.115991	1.70758	258	0
ERS451417_00087	1717.62.peg.84	NA	NA	NA	0.9857	24	Caurimucosum_ATCC700975,"Cbelfantii_FRC0043","Ccallunae_DSM20147","Cdiphtheriae_NCTC11397","Cefficiens_YS314","Cepidermidicanis_DSM45586","Cfalsenii_DSM44353","Cglutamicum_ATCC13032","Clactis_RW25","Cmarinum_DSM44953","Cmustelae_DSM45274","Cpseudotuberculosis_31","Cpseudotuberculosis_ATCC19410","Crouxii_FRC0190","Csilvaticum_KL0182","Csimulans_PES1","Csingulare_IBSB52218","Cterpenotabidum_Y11","C…	0.263725	0.262535	2.09868	0.262563	0.262535	2.09865	2050	1	1. 0.699;2. 232;3. 694;4. 256;5. 246;6. 736;7. 289;8. 865;9. 541;10. I;11. ATC
ERS451417_00367	1717.62.peg.366	NA	NA	NA	0.988	8	Cbelfantii_FRC0043,"Cdiphtheriae_NCTC11397","Cpseudotuberculosis_31","Cpseudotuberculosis_ATCC19410","Crouxii_FRC0190","Csilvaticum_KL0182","Culcerans_NCTC12077","Culcerans_NCTC7910"	0.104564	0.0924646	2.2853	0.104391	0.0924168	2.28136	2	3	1. 0.46671;2. 63;3. 187;4. 87;5. 72;6. 214;7. 81;8. 241;9. 124;10. H;11. CAT	1. 0.42746;2. 188;3. 562;4. 212;5. 197;6. 589;7. 206;8. 616;9. 499;10. T;11. ACA	1. 0.47011;2. 258;3. 772;4. 622;5. 291;6. 871;7. 300;8. 898;9. 688;10. S;11. TCC
ERS451417_00999	1717.62.peg.1010	NA	NA	NA	0.9888	39	Cargentoratense_DSM44202,"Catypicum_R2070","Caurimucosum_ATCC700975","Cbelfantii_FRC0043","Ccallunae_DSM20147","Ccamporealensis_DSM44610","Cdeserti_GIMN1010","Cdiphtheriae_NCTC11397","Cdoosanense_DSM45436","Cefficiens_YS314","Cepidermidicanis_DSM45586","Cfalsenii_DSM44353","Cglutamicum_ATCC13032","Cglycinophilum_AJ3170","Chalotolerans_YIM70093","Chumireducens_DSM45392","Cimitans_DSM44264","Cjeike…	0.0819722	0.0819722	1.65585	0.0819718	0.0819718	1.65585	2	1	1. 0.50854;2. 385;3. 1153;4. 411;5. 411;6. 1231;7. 431;8. 1291;9. 1123;10. V;11. GTT
ERS451417_01169	1717.62.peg.1180	NA	NA	NA	0.9925	39	Cargentoratense_DSM44202,"Catypicum_R2070","Caurimucosum_ATCC700975","Cbelfantii_FRC0043","Ccallunae_DSM20147","Ccamporealensis_DSM44610","Cdeserti_GIMN1010","Cdiphtheriae_NCTC11397","Cdoosanense_DSM45436","Cefficiens_YS314","Cepidermidicanis_DSM45586","Cfalsenii_DSM44353","Cglutamicum_ATCC13032","Cglycinophilum_AJ3170","Chalotolerans_YIM70093","Chumireducens_DSM45392","Cimitans_DSM44264","Cjeike…	0.184093	0.184093	1.52005	0.184093	0.184093	1.52005	2	1	1. 0.54495;2. 326;3. 976;4. 386;5. 386;6. 1156;7. 436;8. 1306;9. 940;10. L;11. TTG
ERS451417_01461	1717.62.peg.1471	NA	NA	NA	0.9926	37	Cargentoratense_DSM44202,"Catypicum_R2070","Caurimucosum_ATCC700975","Cbelfantii_FRC0043","Ccallunae_DSM20147","Ccamporealensis_DSM44610","Cdeserti_GIMN1010","Cdiphtheriae_NCTC11397","Cdoosanense_DSM45436","Cefficiens_YS314","Cepidermidicanis_DSM45586","Cfalsenii_DSM44353","Cglutamicum_ATCC13032","Cglycinophilum_AJ3170","Chalotolerans_YIM70093","Chumireducens_DSM45392","Cimitans_DSM44264","Ckropp…	0.153172	0.153172	1.87181	0.153172	0.153172	1.87178	258	0
ERS451417_01806	1717.62.peg.1812	NA	NA	NA	0.9928	9	Caurimucosum_ATCC700975,"Cbelfantii_FRC0043","Cdiphtheriae_NCTC11397","Cpseudotuberculosis_31","Cpseudotuberculosis_ATCC19410","Csilvaticum_KL0182","Culcerans_NCTC12077","Culcerans_NCTC7910","Cvitaeruminis_DSM20294"	0.261958	0.261958	2.77699	0.261958	0.261958	2.777	2050	7	1. 0.49707;2. 75;3. 223;4. 127;5. 102;6. 304;7. 105;8. 313;9. 157;10. A;11. GCA	1. 0.58347;2. 122;3. 364;4. 174;5. 149;6. 445;7. 152;8. 454;9. 292;10. G;11. GGT	1. 0.44453;2. 218;3. 652;4. 333;5. 271;6. 811;7. 327;8. 979;9. 523;10. A;11. GCA	1. 0.43943;2. 493;3. 1477;4. 735;5. 565;6. 1693;7. 667;8. 1999;9. 1090;10. T;11. ACC	1. 0.40092;2. 502;3. 1504;4. 744;5. 574;6. 1720;7. 676;8. 2026;9. 1117;10. V;11. GTC	1. 0.5789;2. 590;3. 1768;4. 840;5. 662;6. 1984;7. 764;8. 2290;9. 1381;10. D;11. GAC	1. 0.48642;2. 731;3. 2191;4. 1004;5. 826;6. 2476;7. 952;8. 2854;9. 1714;10. L;11. CTC
ERS451417_00390	1717.62.peg.390	NA	NA	NA	0.9929	39	Cargentoratense_DSM44202,"Catypicum_R2070","Caurimucosum_ATCC700975","Cbelfantii_FRC0043","Ccallunae_DSM20147","Ccamporealensis_DSM44610","Cdeserti_GIMN1010","Cdiphtheriae_NCTC11397","Cdoosanense_DSM45436","Cefficiens_YS314","Cepidermidicanis_DSM45586","Cfalsenii_DSM44353","Cglutamicum_ATCC13032","Cglycinophilum_AJ3170","Chalotolerans_YIM70093","Chumireducens_DSM45392","Cimitans_DSM44264","Cjeike…	0.11819	0.075171	2.19362	0.204613	0.075161	2.19362	258	0
ERS451417_00618	1717.62.peg.622	NA	NA	NA	0.9931	39	Cargentoratense_DSM44202,"Catypicum_R2070","Caurimucosum_ATCC700975","Cbelfantii_FRC0043","Ccallunae_DSM20147","Ccamporealensis_DSM44610","Cdeserti_GIMN1010","Cdiphtheriae_NCTC11397","Cdoosanense_DSM45436","Cefficiens_YS314","Cepidermidicanis_DSM45586","Cfalsenii_DSM44353","Cglutamicum_ATCC13032","Cglycinophilum_AJ3170","Chalotolerans_YIM70093","Chumireducens_DSM45392","Cimitans_DSM44264","Cjeike…	0.105663	0.105663	1.95571	0.105663	0.105663	1.95571	2	1	1. 0.5129;2. 158;3. 472;4. 179;5. 179;6. 535;7. 281;8. 841;9. 442;10. E;11. GAG
ERS451417_00399	1717.62.peg.399	NA	NA	NA	0.9933	39	Cargentoratense_DSM44202,"Catypicum_R2070","Caurimucosum_ATCC700975","Cbelfantii_FRC0043","Ccallunae_DSM20147","Ccamporealensis_DSM44610","Cdeserti_GIMN1010","Cdiphtheriae_NCTC11397","Cdoosanense_DSM45436","Cefficiens_YS314","Cepidermidicanis_DSM45586","Cfalsenii_DSM44353","Cglutamicum_ATCC13032","Cglycinophilum_AJ3170","Chalotolerans_YIM70093","Chumireducens_DSM45392","Cimitans_DSM44264","Cjeike…	0.151	0.151	1.85767	0.151009	0.15099	1.85768	258	0
ERS451417_00370	1717.62.peg.369	NA	NA	NA	0.9938	39	Cargentoratense_DSM44202,"Catypicum_R2070","Caurimucosum_ATCC700975","Cbelfantii_FRC0043","Ccallunae_DSM20147","Ccamporealensis_DSM44610","Cdeserti_GIMN1010","Cdiphtheriae_NCTC11397","Cdoosanense_DSM45436","Cefficiens_YS314","Cepidermidicanis_DSM45586","Cfalsenii_DSM44353","Cglutamicum_ATCC13032","Cglycinophilum_AJ3170","Chalotolerans_YIM70093","Chumireducens_DSM45392","Cimitans_DSM44264","Cjeike…	0.103904	0.103904	2.02421	0.103904	0.103904	2.02422	258	0
ERS451417_00365	1717.62.peg.364	NA	NA	NA	0.9938	22	Catypicum_R2070,"Caurimucosum_ATCC700975","Cbelfantii_FRC0043","Ccamporealensis_DSM44610","Cdiphtheriae_NCTC11397","Cepidermidicanis_DSM45586","Cimitans_DSM44264","Cjeikeium_K41","Ckutscheri_DSM20755","Clactis_RW25","Cmustelae_DSM45274","Cpseudotuberculosis_31","Cpseudotuberculosis_ATCC19410","CriegeliiPUDD83A45","Crouxii_FRC0190","Csilvaticum_KL0182","Csimulans_PES1","Csingulare_IBSB52218","Ctes…	0.171573	0.171573	2.00928	0.171573	0.171573	2.0092	1282	0
ERS451417_00758	1717.62.peg.763	NA	NA	NA	0.9941	39	Cargentoratense_DSM44202,"Catypicum_R2070","Caurimucosum_ATCC700975","Cbelfantii_FRC0043","Ccallunae_DSM20147","Ccamporealensis_DSM44610","Cdeserti_GIMN1010","Cdiphtheriae_NCTC11397","Cdoosanense_DSM45436","Cefficiens_YS314","Cepidermidicanis_DSM45586","Cfalsenii_DSM44353","Cglutamicum_ATCC13032","Cglycinophilum_AJ3170","Chalotolerans_YIM70093","Chumireducens_DSM45392","Cimitans_DSM44264","Cjeike…	6.6308	0.117585	2.72259	0.221566	0.117585	2.72259	2304	0
ERS451417_00048	1717.62.peg.44	NA	NA	NA	0.9944	35	Cargentoratense_DSM44202,"Catypicum_R2070","Caurimucosum_ATCC700975","Cbelfantii_FRC0043","Ccamporealensis_DSM44610","Cdeserti_GIMN1010","Cdiphtheriae_NCTC11397","Cdoosanense_DSM45436","Cefficiens_YS314","Cfalsenii_DSM44353","Cglycinophilum_AJ3170","Chalotolerans_YIM70093","Chumireducens_DSM45392","Cimitans_DSM44264","Cjeikeium_K41","Ckroppenstedtii_DSM44385","Clactis_RW25","Cmarinum_DSM44953","C…	0.134713	0.114485	1.91751	0.221756	0.114495	1.9175	3330	0
ERS451417_01996	1717.62.peg.2000	NA	NA	NA	0.9946	7	Cbelfantii_FRC0043,"Cdiphtheriae_NCTC11397","Cpseudotuberculosis_31","Cpseudotuberculosis_ATCC19410","Csilvaticum_KL0182","Culcerans_NCTC12077","Culcerans_NCTC7910"	0.323259	0.323259	5.0685	0.334195	0.323249	5.0685	258	0
ERS451417_00593	1717.62.peg.597	NA	NA	NA	0.9948	24	Cargentoratense_DSM44202,"Catypicum_R2070","Cbelfantii_FRC0043","Ccallunae_DSM20147","Cdeserti_GIMN1010","Cdiphtheriae_NCTC11397","Cefficiens_YS314","Cepidermidicanis_DSM45586","Cfalsenii_DSM44353","Cglutamicum_ATCC13032","Cglycinophilum_AJ3170","Ckroppenstedtii_DSM44385","Ckutscheri_DSM20755","Clactis_RW25","Cmustelae_DSM45274","Cpseudotuberculosis_31","Cpseudotuberculosis_ATCC19410","Crouxii_FR…	0.0390919	0.0390919	2.15437	0.0390919	0.0390919	2.15437	2050	1	1. 0.42544;2. 313;3. 937;4. 325;5. 325;6. 973;7. 365;8. 1093;9. 679;10. T;11. ACT
ERS451417_01419	1717.62.peg.1425	NA	NA	NA	0.9952	17	Cbelfantii_FRC0043,"Ccallunae_DSM20147","Cdeserti_GIMN1010","Cdiphtheriae_NCTC11397","Cdoosanense_DSM45436","Cefficiens_YS314","Cglutamicum_ATCC13032","Chalotolerans_YIM70093","Chumireducens_DSM45392","Cmarinum_DSM44953","Cmaris_DSM45190","Cpseudotuberculosis_31","Cpseudotuberculosis_ATCC19410","Csilvaticum_KL0182","Ctestudinoris_DSM44614","Culcerans_NCTC12077","Culcerans_NCTC7910"	0.301418	0.301418	1.72389	0.301418	0.301418	1.72389	2	1	1. 0.45417;2. 255;3. 763;4. 307;5. 256;6. 766;7. 264;8. 790;9. 709;10. L;11. CTG
ERS451417_01542	1717.62.peg.1551	NA	NA	NA	0.9958	38	Cargentoratense_DSM44202,"Catypicum_R2070","Caurimucosum_ATCC700975","Cbelfantii_FRC0043","Ccallunae_DSM20147","Ccamporealensis_DSM44610","Cdeserti_GIMN1010","Cdiphtheriae_NCTC11397","Cdoosanense_DSM45436","Cefficiens_YS314","Cepidermidicanis_DSM45586","Cfalsenii_DSM44353","Cglutamicum_ATCC13032","Cglycinophilum_AJ3170","Chalotolerans_YIM70093","Chumireducens_DSM45392","Cimitans_DSM44264","Cjeike…	0.692862	0.203322	2.16416	0.288358	0.203322	2.16416	258	0
ERS451417_00400	1717.62.peg.400	NA	NA	NA	0.9958	39	Cargentoratense_DSM44202,"Catypicum_R2070","Caurimucosum_ATCC700975","Cbelfantii_FRC0043","Ccallunae_DSM20147","Ccamporealensis_DSM44610","Cdeserti_GIMN1010","Cdiphtheriae_NCTC11397","Cdoosanense_DSM45436","Cefficiens_YS314","Cepidermidicanis_DSM45586","Cfalsenii_DSM44353","Cglutamicum_ATCC13032","Cglycinophilum_AJ3170","Chalotolerans_YIM70093","Chumireducens_DSM45392","Cimitans_DSM44264","Cjeike…	0.0674711	0.0674612	2.85346	0.165829	0.0674512	2.85346	258	0
ERS451417_00452	1717.62.peg.456	NA	NA	NA	0.9959	10	Cbelfantii_FRC0043,"Cdiphtheriae_NCTC11397","Cepidermidicanis_DSM45586","Cmustelae_DSM45274","Cpseudotuberculosis_31","Cpseudotuberculosis_ATCC19410","Crouxii_FRC0190","Csilvaticum_KL0182","Culcerans_NCTC12077","Culcerans_NCTC7910"	0.207826	0.207826	2.28942	0.207816	0.207816	2.28941	258	0
1717.62.peg.244	1717.62.peg.244	NA	NA	NA	0.9961	39	Cargentoratense_DSM44202,"Catypicum_R2070","Caurimucosum_ATCC700975","Cbelfantii_FRC0043","Ccallunae_DSM20147","Ccamporealensis_DSM44610","Cdeserti_GIMN1010","Cdiphtheriae_NCTC11397","Cdoosanense_DSM45436","Cefficiens_YS314","Cepidermidicanis_DSM45586","Cfalsenii_DSM44353","Cglutamicum_ATCC13032","Cglycinophilum_AJ3170","Chalotolerans_YIM70093","Chumireducens_DSM45392","Cimitans_DSM44264","Cjeike…	0.532688	0.155999	1.47383	0.268464	0.15599	1.47383	258	0
ERS451417_02267	1717.62.peg.2296	NA	NA	NA	0.9963	11	Cbelfantii_FRC0043,"Cdiphtheriae_NCTC11397","Cepidermidicanis_DSM45586","Ckutscheri_DSM20755","Cpseudotuberculosis_31","Cpseudotuberculosis_ATCC19410","Csilvaticum_KL0182","Ctestudinoris_DSM44614","Culcerans_NCTC12077","Culcerans_NCTC7910","Cvitaeruminis_DSM20294"	0.241501	0.241501	2.23914	0.241501	0.241501	2.23914	258	0
ERS451417_00998	1717.62.peg.1009	NA	NA	NA	0.9966	39	Cargentoratense_DSM44202,"Catypicum_R2070","Caurimucosum_ATCC700975","Cbelfantii_FRC0043","Ccallunae_DSM20147","Ccamporealensis_DSM44610","Cdeserti_GIMN1010","Cdiphtheriae_NCTC11397","Cdoosanense_DSM45436","Cefficiens_YS314","Cepidermidicanis_DSM45586","Cfalsenii_DSM44353","Cglutamicum_ATCC13032","Cglycinophilum_AJ3170","Chalotolerans_YIM70093","Chumireducens_DSM45392","Cimitans_DSM44264","Cjeike…	0.114205	0.114205	1.79323	0.114205	0.114205	1.79323	258	0
ERS451417_00735	1717.62.peg.738	NA	NA	NA	0.9966	9	Catypicum_R2070,"Cbelfantii_FRC0043","Cdiphtheriae_NCTC11397","Cpseudotuberculosis_31","Cpseudotuberculosis_ATCC19410","Crouxii_FRC0190","Csilvaticum_KL0182","Culcerans_NCTC12077","Culcerans_NCTC7910"	0.198245	0.198245	2.77054	0.198245	0.198245	2.77054	258	0
ERS451417_01645	1717.62.peg.1652	NA	NA	NA	0.9968	20	Cargentoratense_DSM44202,"Catypicum_R2070","Cbelfantii_FRC0043","Ccallunae_DSM20147","Cdeserti_GIMN1010","Cdiphtheriae_NCTC11397","Cefficiens_YS314","Cglutamicum_ATCC13032","Chalotolerans_YIM70093","Chumireducens_DSM45392","Cimitans_DSM44264","Ckutscheri_DSM20755","Cmarinum_DSM44953","Cmaris_DSM45190","Cmustelae_DSM45274","Cpseudotuberculosis_ATCC19410","Csilvaticum_KL0182","Ctestudinoris_DSM4461…	0.242999	0.242999	1.52895	0.242999	0.242999	1.52895	2306	0
ERS451417_00509	1717.62.peg.513	NA	NA	NA	0.9968	39	Cargentoratense_DSM44202,"Catypicum_R2070","Caurimucosum_ATCC700975","Cbelfantii_FRC0043","Ccallunae_DSM20147","Ccamporealensis_DSM44610","Cdeserti_GIMN1010","Cdiphtheriae_NCTC11397","Cdoosanense_DSM45436","Cefficiens_YS314","Cepidermidicanis_DSM45586","Cfalsenii_DSM44353","Cglutamicum_ATCC13032","Cglycinophilum_AJ3170","Chalotolerans_YIM70093","Chumireducens_DSM45392","Cimitans_DSM44264","Cjeike…	0.364517	0.101692	2.4538	0.18886	0.101692	2.45381	258	0
ERS451417_00358	1717.62.peg.357	NA	NA	NA	0.997	39	Cargentoratense_DSM44202,"Catypicum_R2070","Caurimucosum_ATCC700975","Cbelfantii_FRC0043","Ccallunae_DSM20147","Ccamporealensis_DSM44610","Cdeserti_GIMN1010","Cdiphtheriae_NCTC11397","Cdoosanense_DSM45436","Cefficiens_YS314","Cepidermidicanis_DSM45586","Cfalsenii_DSM44353","Cglutamicum_ATCC13032","Cglycinophilum_AJ3170","Chalotolerans_YIM70093","Chumireducens_DSM45392","Cimitans_DSM44264","Cjeike…	0.557436	0.185403	1.87577	0.316811	0.185403	1.87577	258	0
ERS451417_00475	1717.62.peg.478	NA	NA	NA	0.997	39	Cargentoratense_DSM44202,"Catypicum_R2070","Caurimucosum_ATCC700975","Cbelfantii_FRC0043","Ccallunae_DSM20147","Ccamporealensis_DSM44610","Cdeserti_GIMN1010","Cdiphtheriae_NCTC11397","Cdoosanense_DSM45436","Cefficiens_YS314","Cepidermidicanis_DSM45586","Cfalsenii_DSM44353","Cglutamicum_ATCC13032","Cglycinophilum_AJ3170","Chalotolerans_YIM70093","Chumireducens_DSM45392","Cimitans_DSM44264","Cjeike…	0.183942	0.183942	1.88134	0.183932	0.183932	1.88135	2306	0
ERS451417_02034	1717.62.peg.2039	NA	NA	NA	0.997	38	Cargentoratense_DSM44202,"Catypicum_R2070","Caurimucosum_ATCC700975","Cbelfantii_FRC0043","Ccallunae_DSM20147","Ccamporealensis_DSM44610","Cdeserti_GIMN1010","Cdiphtheriae_NCTC11397","Cdoosanense_DSM45436","Cefficiens_YS314","Cepidermidicanis_DSM45586","Cfalsenii_DSM44353","Cglutamicum_ATCC13032","Cglycinophilum_AJ3170","Chalotolerans_YIM70093","Chumireducens_DSM45392","Cimitans_DSM44264","Cjeike…	0.0958951	0.0958951	1.99082	0.0958948	0.0958948	1.99081	2	1	1. 0.50966;2. 235;3. 703;4. 235;5. 235;6. 703;7. 235;8. 703;9. 685;10. E;11. GAA
ERS451417_01751	1717.62.peg.1754	NA	NA	NA	0.9975	8	Cbelfantii_FRC0043,"Cdiphtheriae_NCTC11397","Ckutscheri_DSM20755","Cpseudotuberculosis_ATCC19410","Csilvaticum_KL0182","Culcerans_NCTC12077","Culcerans_NCTC7910","Cvitaeruminis_DSM20294"	0.0610306	0.0610306	2.0077	0.0610401	0.0610306	2.00771	2	2	1. 0.55419;2. 9;3. 25;4. 48;5. 9;6. 25;7. 9;8. 25;9. 19;10. R;11. CGT	1. 0.45461;2. 115;3. 343;4. 178;5. 118;6. 352;7. 118;8. 352;9. 271;10. N;11. AAC
ERS451417_00005	1717.62.peg.6	NA	NA	NA	0.9977	39	Cargentoratense_DSM44202,"Catypicum_R2070","Caurimucosum_ATCC700975","Cbelfantii_FRC0043","Ccallunae_DSM20147","Ccamporealensis_DSM44610","Cdeserti_GIMN1010","Cdiphtheriae_NCTC11397","Cdoosanense_DSM45436","Cefficiens_YS314","Cepidermidicanis_DSM45586","Cfalsenii_DSM44353","Cglutamicum_ATCC13032","Cglycinophilum_AJ3170","Chalotolerans_YIM70093","Chumireducens_DSM45392","Cimitans_DSM44264","Cjeike…	0.122071	0.122071	1.93327	0.122071	0.122071	1.93327	258	0
ERS451417_00414	1717.62.peg.414	NA	NA	NA	0.9977	11	Catypicum_R2070,"Cbelfantii_FRC0043","Cdiphtheriae_NCTC11397","Cepidermidicanis_DSM45586","Ckutscheri_DSM20755","Cpseudotuberculosis_31","Cpseudotuberculosis_ATCC19410","Crouxii_FRC0190","Csilvaticum_KL0182","Culcerans_NCTC12077","Culcerans_NCTC7910"	0.120384	0.120384	2.34075	0.120394	0.120394	2.34078	2	1	1. 0.42746;2. 336;3. 1006;4. 376;5. 359;6. 1075;7. 383;8. 1147;9. 835;10. T;11. ACA
ERS451417_02405	1717.62.peg.2437	NA	NA	NA	0.9977	33	Cargentoratense_DSM44202,"Catypicum_R2070","Caurimucosum_ATCC700975","Cbelfantii_FRC0043","Ccallunae_DSM20147","Ccamporealensis_DSM44610","Cdeserti_GIMN1010","Cdiphtheriae_NCTC11397","Cdoosanense_DSM45436","Cefficiens_YS314","Cepidermidicanis_DSM45586","Cfalsenii_DSM44353","Cglutamicum_ATCC13032","Cimitans_DSM44264","Cjeikeium_K41","Ckroppenstedtii_DSM44385","Ckutscheri_DSM20755","Clactis_RW25","…	0.635554	0.249312	2.12097	0.394565	0.249322	2.12097	258	0
ERS451417_00964	1717.62.peg.971	NA	NA	NA	0.9977	8	Cbelfantii_FRC0043,"Cdiphtheriae_NCTC11397","Cpseudotuberculosis_31","Cpseudotuberculosis_ATCC19410","Crouxii_FRC0190","Csilvaticum_KL0182","Culcerans_NCTC12077","Culcerans_NCTC7910"	0.04377	0.04377	2.54766	0.04377	0.04377	2.54766	258	0
ERS451417_02315	1717.62.peg.2342	NA	NA	NA	0.9977	38	Cargentoratense_DSM44202,"Catypicum_R2070","Caurimucosum_ATCC700975","Cbelfantii_FRC0043","Ccallunae_DSM20147","Ccamporealensis_DSM44610","Cdeserti_GIMN1010","Cdiphtheriae_NCTC11397","Cdoosanense_DSM45436","Cefficiens_YS314","Cepidermidicanis_DSM45586","Cfalsenii_DSM44353","Cglutamicum_ATCC13032","Cglycinophilum_AJ3170","Chalotolerans_YIM70093","Chumireducens_DSM45392","Cimitans_DSM44264","Cjeike…	0.665174	0.260943	1.86711	0.380291	0.260952	1.86711	258	0
ERS451417_00086	1717.62.peg.83	NA	NA	NA	0.9977	26	Cbelfantii_FRC0043,"Ccallunae_DSM20147","Ccamporealensis_DSM44610","Cdeserti_GIMN1010","Cdiphtheriae_NCTC11397","Cefficiens_YS314","Cepidermidicanis_DSM45586","Cfalsenii_DSM44353","Cglutamicum_ATCC13032","Cglycinophilum_AJ3170","Chalotolerans_YIM70093","Chumireducens_DSM45392","Cjeikeium_K41","Ckroppenstedtii_DSM44385","Clactis_RW25","Cmarinum_DSM44953","Cmaris_DSM45190","Cpseudotuberculosis_31",…	0.143338	0.143338	1.55042	0.143338	0.143338	1.55042	258	0
ERS451417_00661	1717.62.peg.665	NA	NA	NA	0.998	36	Catypicum_R2070,"Caurimucosum_ATCC700975","Cbelfantii_FRC0043","Ccallunae_DSM20147","Ccamporealensis_DSM44610","Cdeserti_GIMN1010","Cdiphtheriae_NCTC11397","Cdoosanense_DSM45436","Cefficiens_YS314","Cepidermidicanis_DSM45586","Cfalsenii_DSM44353","Cglutamicum_ATCC13032","Chalotolerans_YIM70093","Chumireducens_DSM45392","Cimitans_DSM44264","Cjeikeium_K41","Ckroppenstedtii_DSM44385","Ckutscheri_DSM…	0.248735	0.248735	1.556	0.248735	0.248735	1.556	3330	0
ERS451417_01000	1717.62.peg.1011	NA	NA	NA	0.998	24	Cbelfantii_FRC0043,"Ccallunae_DSM20147","Cdeserti_GIMN1010","Cdiphtheriae_NCTC11397","Cdoosanense_DSM45436","Cefficiens_YS314","Cglutamicum_ATCC13032","Cglycinophilum_AJ3170","Chalotolerans_YIM70093","Chumireducens_DSM45392","Ckroppenstedtii_DSM44385","Clactis_RW25","Cmarinum_DSM44953","Cmaris_DSM45190","Cpseudotuberculosis_31","Cpseudotuberculosis_ATCC19410","Crouxii_FRC0190","Csilvaticum_KL0182…	0.148208	0.148208	1.65394	0.148208	0.148208	1.65394	2	2	1. 0.48414;2. 188;3. 562;4. 246;5. 240;6. 718;7. 290;8. 868;9. 499;10. E;11. GAA	1. 0.48677;2. 277;3. 829;4. 349;5. 338;6. 1012;7. 398;8. 1192;9. 712;10. R;11. CGT
ERS451417_01273	1717.62.peg.1281	NA	NA	NA	0.998	17	Cargentoratense_DSM44202,"Cbelfantii_FRC0043","Cdiphtheriae_NCTC11397","Cefficiens_YS314","Cepidermidicanis_DSM45586","Cglutamicum_ATCC13032","Ckroppenstedtii_DSM44385","Ckutscheri_DSM20755","Clactis_RW25","Cmustelae_DSM45274","Cpseudotuberculosis_31","Cpseudotuberculosis_ATCC19410","Crouxii_FRC0190","Csilvaticum_KL0182","Culcerans_NCTC12077","Culcerans_NCTC7910","Cvitaeruminis_DSM20294"	0.0973196	0.0973196	2.21865	0.0973196	0.0973196	2.21867	258	0
ERS451417_00803	1717.62.peg.810	NA	NA	NA	0.998	39	Cargentoratense_DSM44202,"Catypicum_R2070","Caurimucosum_ATCC700975","Cbelfantii_FRC0043","Ccallunae_DSM20147","Ccamporealensis_DSM44610","Cdeserti_GIMN1010","Cdiphtheriae_NCTC11397","Cdoosanense_DSM45436","Cefficiens_YS314","Cepidermidicanis_DSM45586","Cfalsenii_DSM44353","Cglutamicum_ATCC13032","Cglycinophilum_AJ3170","Chalotolerans_YIM70093","Chumireducens_DSM45392","Cimitans_DSM44264","Cjeike…	0.0776435	0.0776435	2.08109	0.0776533	0.0776533	2.08109	258	0
ERS451417_02259	1717.62.peg.2288	NA	NA	NA	0.998	14	Caurimucosum_ATCC700975,"Cbelfantii_FRC0043","Ccamporealensis_DSM44610","Cdiphtheriae_NCTC11397","Ckroppenstedtii_DSM44385","Clactis_RW25","Cmustelae_DSM45274","Cpseudotuberculosis_31","Cpseudotuberculosis_ATCC19410","Csilvaticum_KL0182","Csimulans_PES1","Csingulare_IBSB52218","Culcerans_NCTC12077","Culcerans_NCTC7910"	0.151046	0.151046	2.51315	0.151046	0.151046	2.51315	258	0
ERS451417_01864	1717.62.peg.1866	NA	NA	NA	0.998	38	Cargentoratense_DSM44202,"Catypicum_R2070","Caurimucosum_ATCC700975","Cbelfantii_FRC0043","Ccallunae_DSM20147","Ccamporealensis_DSM44610","Cdeserti_GIMN1010","Cdiphtheriae_NCTC11397","Cdoosanense_DSM45436","Cefficiens_YS314","Cepidermidicanis_DSM45586","Cfalsenii_DSM44353","Cglutamicum_ATCC13032","Cglycinophilum_AJ3170","Chalotolerans_YIM70093","Chumireducens_DSM45392","Cimitans_DSM44264","Cjeike…	0.0995232	0.0995232	1.91486	0.0995232	0.0995232	1.91486	3330	0
ERS451417_01164	1717.62.peg.1175	NA	NA	NA	0.9984	37	Cargentoratense_DSM44202,"Catypicum_R2070","Caurimucosum_ATCC700975","Cbelfantii_FRC0043","Ccallunae_DSM20147","Ccamporealensis_DSM44610","Cdeserti_GIMN1010","Cdiphtheriae_NCTC11397","Cdoosanense_DSM45436","Cefficiens_YS314","Cfalsenii_DSM44353","Cglutamicum_ATCC13032","Cglycinophilum_AJ3170","Chalotolerans_YIM70093","Chumireducens_DSM45392","Cimitans_DSM44264","Cjeikeium_K41","Ckroppenstedtii_DS…	0.171397	0.171397	1.61331	0.171397	0.171397	1.61326	3330	0
ERS451417_01449	1717.62.peg.1456	NA	NA	NA	0.9984	35	Cargentoratense_DSM44202,"Catypicum_R2070","Caurimucosum_ATCC700975","Cbelfantii_FRC0043","Ccallunae_DSM20147","Ccamporealensis_DSM44610","Cdeserti_GIMN1010","Cdiphtheriae_NCTC11397","Cdoosanense_DSM45436","Cefficiens_YS314","Cepidermidicanis_DSM45586","Cfalsenii_DSM44353","Cglutamicum_ATCC13032","Cglycinophilum_AJ3170","Chalotolerans_YIM70093","Chumireducens_DSM45392","Cimitans_DSM44264","Cjeike…	0.0800615	0.0800615	1.58445	0.0800615	0.0800615	1.58445	3330	0
ERS451417_01649	1717.62.peg.1656	NA	NA	NA	0.9984	37	Cargentoratense_DSM44202,"Catypicum_R2070","Caurimucosum_ATCC700975","Cbelfantii_FRC0043","Ccallunae_DSM20147","Ccamporealensis_DSM44610","Cdeserti_GIMN1010","Cdiphtheriae_NCTC11397","Cdoosanense_DSM45436","Cefficiens_YS314","Cepidermidicanis_DSM45586","Cfalsenii_DSM44353","Cglutamicum_ATCC13032","Cglycinophilum_AJ3170","Chalotolerans_YIM70093","Chumireducens_DSM45392","Cimitans_DSM44264","Cjeike…	0.191621	0.191621	1.76432	0.191621	0.191621	1.76432	2	1	1. 0.42301;2. 311;3. 931;4. 615;5. 323;6. 967;7. 334;8. 1000;9. 829;10. I;11. ATC
ERS451417_00719	1717.62.peg.724	NA	NA	NA	0.9984	34	Cargentoratense_DSM44202,"Caurimucosum_ATCC700975","Cbelfantii_FRC0043","Ccallunae_DSM20147","Ccamporealensis_DSM44610","Cdeserti_GIMN1010","Cdiphtheriae_NCTC11397","Cdoosanense_DSM45436","Cefficiens_YS314","Cepidermidicanis_DSM45586","Cfalsenii_DSM44353","Cglutamicum_ATCC13032","Cglycinophilum_AJ3170","Chalotolerans_YIM70093","Chumireducens_DSM45392","Cimitans_DSM44264","Clactis_RW25","Cmarinum_…	0.145149	0.145149	1.72678	0.145149	0.145149	1.72679	2	2	1. 0.47106;2. 228;3. 682;4. 246;5. 246;6. 736;7. 259;8. 775;9. 532;10. F;11. TTC	1. 0.41487;2. 462;3. 1384;4. 481;5. 481;6. 1441;7. 514;8. 1540;9. 1183;10. V;11. GTG
ERS451417_00799	1717.62.peg.805	NA	NA	NA	0.9984	7	Cbelfantii_FRC0043,"Cdiphtheriae_NCTC11397","Cpseudotuberculosis_31","Cpseudotuberculosis_ATCC19410","Crouxii_FRC0190","Culcerans_NCTC12077","Culcerans_NCTC7910"	0.0913189	0.0913189	2.21481	0.0913189	0.0913189	2.21481	4098	1	1. 0.41885;2. 27;3. 79;4. 84;5. 60;6. 178;7. 93;8. 277;9. 79;10. S;11. AGT
ERS451417_00069	1717.62.peg.65	NA	NA	NA	0.9984	23	Cargentoratense_DSM44202,"Cbelfantii_FRC0043","Ccallunae_DSM20147","Cdiphtheriae_NCTC11397","Cdoosanense_DSM45436","Cefficiens_YS314","Cfalsenii_DSM44353","Chalotolerans_YIM70093","Chumireducens_DSM45392","Ckroppenstedtii_DSM44385","Ckutscheri_DSM20755","Clactis_RW25","Cmarinum_DSM44953","Cmaris_DSM45190","Cmustelae_DSM45274","Cpseudotuberculosis_31","Cpseudotuberculosis_ATCC19410","Crouxii_FRC01…	0.297792	0.297792	1.66965	0.297792	0.297792	1.66965	3330	0
ERS451417_01507	1717.62.peg.1515	NA	NA	NA	0.9984	38	Cargentoratense_DSM44202,"Catypicum_R2070","Caurimucosum_ATCC700975","Cbelfantii_FRC0043","Ccallunae_DSM20147","Ccamporealensis_DSM44610","Cdeserti_GIMN1010","Cdiphtheriae_NCTC11397","Cdoosanense_DSM45436","Cefficiens_YS314","Cepidermidicanis_DSM45586","Cfalsenii_DSM44353","Cglutamicum_ATCC13032","Cglycinophilum_AJ3170","Chalotolerans_YIM70093","Chumireducens_DSM45392","Cimitans_DSM44264","Cjeike…	0.145778	0.145778	1.71929	0.145778	0.145778	1.7193	2306	0
ERS451417_01611	1717.62.peg.1620	NA	NA	NA	0.9984	38	Cargentoratense_DSM44202,"Catypicum_R2070","Caurimucosum_ATCC700975","Cbelfantii_FRC0043","Ccallunae_DSM20147","Ccamporealensis_DSM44610","Cdeserti_GIMN1010","Cdiphtheriae_NCTC11397","Cdoosanense_DSM45436","Cefficiens_YS314","Cepidermidicanis_DSM45586","Cfalsenii_DSM44353","Cglutamicum_ATCC13032","Cglycinophilum_AJ3170","Chalotolerans_YIM70093","Chumireducens_DSM45392","Cimitans_DSM44264","Cjeike…	0.165545	0.165545	1.71266	0.165545	0.165545	1.71266	2	1	1. 0.48666;2. 407;3. 1219;4. 478;5. 478;6. 1432;7. 591;8. 1771;9. 1021;10. G;11. GGT
ERS451417_01548	1717.62.peg.1557	NA	NA	NA	0.9984	38	Cargentoratense_DSM44202,"Catypicum_R2070","Caurimucosum_ATCC700975","Cbelfantii_FRC0043","Ccallunae_DSM20147","Ccamporealensis_DSM44610","Cdeserti_GIMN1010","Cdiphtheriae_NCTC11397","Cdoosanense_DSM45436","Cefficiens_YS314","Cepidermidicanis_DSM45586","Cfalsenii_DSM44353","Cglutamicum_ATCC13032","Cglycinophilum_AJ3170","Chalotolerans_YIM70093","Chumireducens_DSM45392","Cimitans_DSM44264","Cjeike…	0.122713	0.122713	1.75103	0.122713	0.122713	1.75103	1282	0
ERS451417_01358	1717.62.peg.1366	NA	NA	NA	0.9984	8	Cbelfantii_FRC0043,"Cdiphtheriae_NCTC11397","Cmustelae_DSM45274","Cpseudotuberculosis_31","Cpseudotuberculosis_ATCC19410","Csilvaticum_KL0182","Culcerans_NCTC12077","Culcerans_NCTC7910"	0.188972	0.188972	3.1625	0.188972	0.188972	3.16248	2	1	1. 0.49103;2. 72;3. 214;4. 111;5. 73;6. 217;7. 74;8. 220;9. 154;10. E;11. GAA
ERS451417_00960	1717.62.peg.967	NA	NA	NA	0.9984	39	Cargentoratense_DSM44202,"Catypicum_R2070","Caurimucosum_ATCC700975","Cbelfantii_FRC0043","Ccallunae_DSM20147","Ccamporealensis_DSM44610","Cdeserti_GIMN1010","Cdiphtheriae_NCTC11397","Cdoosanense_DSM45436","Cefficiens_YS314","Cepidermidicanis_DSM45586","Cfalsenii_DSM44353","Cglutamicum_ATCC13032","Cglycinophilum_AJ3170","Chalotolerans_YIM70093","Chumireducens_DSM45392","Cimitans_DSM44264","Cjeike…	0.156421	0.156421	1.70631	0.156421	0.156421	1.70632	258	0
ERS451417_00241	1717.62.peg.236	NA	NA	NA	0.9984	7	Cbelfantii_FRC0043,"Cdiphtheriae_NCTC11397","Cpseudotuberculosis_31","Cpseudotuberculosis_ATCC19410","Crouxii_FRC0190","Culcerans_NCTC12077","Culcerans_NCTC7910"	0.270506	0.270506	3.30139	0.270506	0.270506	3.30139	4354	0
ERS451417_00288	1717.62.peg.289	NA	NA	NA	0.9984	25	Catypicum_R2070,"Cbelfantii_FRC0043","Ccallunae_DSM20147","Cdeserti_GIMN1010","Cdiphtheriae_NCTC11397","Cefficiens_YS314","Cepidermidicanis_DSM45586","Cglutamicum_ATCC13032","Chalotolerans_YIM70093","Chumireducens_DSM45392","Cimitans_DSM44264","Ckutscheri_DSM20755","Clactis_RW25","Cmarinum_DSM44953","Cmaris_DSM45190","Cmustelae_DSM45274","Cpseudotuberculosis_31","Cpseudotuberculosis_ATCC19410","C…	0.23493	0.23493	1.59449	0.23493	0.23493	1.59449	3074	2	1. 0.53665;2. 281;3. 841;4. 330;5. 330;6. 988;7. 402;8. 1204;9. 634;10. G;11. GGT	1. 0.50792;2. 574;3. 1720;4. 639;5. 639;6. 1915;7. 748;8. 2242;9. 1273;10. A;11. GCG
ERS451417_01007	1717.62.peg.1018	NA	NA	NA	0.9984	13	Caurimucosum_ATCC700975,"Cbelfantii_FRC0043","Ccallunae_DSM20147","Cdiphtheriae_NCTC11397","Chalotolerans_YIM70093","Cmarinum_DSM44953","Cpseudotuberculosis_31","Cpseudotuberculosis_ATCC19410","Crouxii_FRC0190","Csilvaticum_KL0182","Csingulare_IBSB52218","Culcerans_NCTC12077","Culcerans_NCTC7910"	0.118994	0.118994	2.1771	0.118994	0.118994	2.1771	1026	1	1. 0.64812;2. 105;3. 313;4. 134;5. 132;6. 394;7. 147;8. 439;9. 286;10. V;11. GTA
ERS451417_01780	1717.62.peg.1784	NA	NA	NA	0.9984	38	Cargentoratense_DSM44202,"Catypicum_R2070","Caurimucosum_ATCC700975","Cbelfantii_FRC0043","Ccallunae_DSM20147","Ccamporealensis_DSM44610","Cdeserti_GIMN1010","Cdiphtheriae_NCTC11397","Cdoosanense_DSM45436","Cefficiens_YS314","Cepidermidicanis_DSM45586","Cfalsenii_DSM44353","Cglutamicum_ATCC13032","Cglycinophilum_AJ3170","Chalotolerans_YIM70093","Chumireducens_DSM45392","Cimitans_DSM44264","Cjeike…	0.078564	0.078564	1.99561	0.078564	0.078564	1.9956	258	0
ERS451417_01668	1717.62.peg.1675	NA	NA	NA	0.9989	38	Cargentoratense_DSM44202,"Catypicum_R2070","Caurimucosum_ATCC700975","Cbelfantii_FRC0043","Ccallunae_DSM20147","Ccamporealensis_DSM44610","Cdeserti_GIMN1010","Cdiphtheriae_NCTC11397","Cdoosanense_DSM45436","Cefficiens_YS314","Cepidermidicanis_DSM45586","Cfalsenii_DSM44353","Cglutamicum_ATCC13032","Cglycinophilum_AJ3170","Chalotolerans_YIM70093","Chumireducens_DSM45392","Cimitans_DSM44264","Cjeike…	0.140312	0.140312	1.70384	0.140312	0.140312	1.70384	258	0
ERS451417_00381	1717.62.peg.381	NA	NA	NA	0.9989	9	Cbelfantii_FRC0043,"Cdiphtheriae_NCTC11397","Cglycinophilum_AJ3170","Cpseudotuberculosis_31","Cpseudotuberculosis_ATCC19410","Crouxii_FRC0190","Csilvaticum_KL0182","Culcerans_NCTC12077","Culcerans_NCTC7910"	0.216858	0.216858	3.57313	0.216858	0.216858	3.57314	1026	2	1. 0.41459;2. 121;3. 361;4. 200;5. 184;6. 550;7. 261;8. 781;9. 202;10. V;11. GTG	1. 0.41827;2. 300;3. 898;4. 393;5. 371;6. 1111;7. 453;8. 1357;9. 721;10. D;11. GAC
ERS451417_01252	1717.62.peg.1260	NA	NA	NA	0.9989	8	Cbelfantii_FRC0043,"Cdiphtheriae_NCTC11397","Cpseudotuberculosis_31","Cpseudotuberculosis_ATCC19410","Crouxii_FRC0190","Csilvaticum_KL0182","Culcerans_NCTC12077","Culcerans_NCTC7910"	0.06166	0.06166	4.11545	0.06166	0.06166	4.11545	1282	0
ERS451417_01176	1717.62.peg.1185	NA	NA	NA	0.9989	8	Cbelfantii_FRC0043,"Cdiphtheriae_NCTC11397","Cpseudotuberculosis_31","Cpseudotuberculosis_ATCC19410","Crouxii_FRC0190","Csilvaticum_KL0182","Culcerans_NCTC12077","Culcerans_NCTC7910"	0.705467	0.682751	3.58099	0.743101	0.682751	3.58099	2306	0
ERS451417_01893	1717.62.peg.1892	NA	NA	NA	0.9989	38	Cargentoratense_DSM44202,"Catypicum_R2070","Caurimucosum_ATCC700975","Cbelfantii_FRC0043","Ccallunae_DSM20147","Ccamporealensis_DSM44610","Cdeserti_GIMN1010","Cdiphtheriae_NCTC11397","Cdoosanense_DSM45436","Cefficiens_YS314","Cepidermidicanis_DSM45586","Cfalsenii_DSM44353","Cglutamicum_ATCC13032","Cglycinophilum_AJ3170","Chalotolerans_YIM70093","Chumireducens_DSM45392","Cimitans_DSM44264","Cjeike…	0.100403	0.100403	2.22323	0.100403	0.100403	2.22324	2306	0
ERS451417_01701	1717.62.peg.1707	NA	NA	NA	0.9989	8	Cbelfantii_FRC0043,"Cdiphtheriae_NCTC11397","Clactis_RW25","Cmustelae_DSM45274","Cpseudotuberculosis_ATCC19410","Csilvaticum_KL0182","Culcerans_NCTC12077","Culcerans_NCTC7910"	0.0738805	0.0738805	1.73753	0.0738805	0.0738805	1.73753	3330	0
ERS451417_00596	1717.62.peg.600	NA	NA	NA	0.9989	30	Cargentoratense_DSM44202,"Caurimucosum_ATCC700975","Cbelfantii_FRC0043","Ccallunae_DSM20147","Ccamporealensis_DSM44610","Cdeserti_GIMN1010","Cdiphtheriae_NCTC11397","Cdoosanense_DSM45436","Cefficiens_YS314","Cepidermidicanis_DSM45586","Cglutamicum_ATCC13032","Chalotolerans_YIM70093","Chumireducens_DSM45392","Cimitans_DSM44264","Ckutscheri_DSM20755","Clactis_RW25","Cmarinum_DSM44953","Cmaris_DSM45…	0.0790109	0.0790109	2.1223	0.0790109	0.0790109	2.1223	258	0
ERS451417_02138	1717.62.peg.2158	NA	NA	NA	0.9989	6	Cbelfantii_FRC0043,"Cdiphtheriae_NCTC11397","Cpseudotuberculosis_31","Cpseudotuberculosis_ATCC19410","Culcerans_NCTC12077","Culcerans_NCTC7910"	0.232495	0.232495	2.62807	0.232495	0.232495	2.62806	4098	1	1. 0.46492;2. 26;3. 76;4. 155;5. 27;6. 79;7. 27;8. 79;9. 76;10. A;11. GCT
ERS451417_00526	1717.62.peg.529	NA	NA	NA	0.9989	39	Cargentoratense_DSM44202,"Catypicum_R2070","Caurimucosum_ATCC700975","Cbelfantii_FRC0043","Ccallunae_DSM20147","Ccamporealensis_DSM44610","Cdeserti_GIMN1010","Cdiphtheriae_NCTC11397","Cdoosanense_DSM45436","Cefficiens_YS314","Cepidermidicanis_DSM45586","Cfalsenii_DSM44353","Cglutamicum_ATCC13032","Cglycinophilum_AJ3170","Chalotolerans_YIM70093","Chumireducens_DSM45392","Cimitans_DSM44264","Cjeike…	0.126173	0.126173	2.41435	0.126173	0.126173	2.41435	258	0
ERS451417_00496	1717.62.peg.499	NA	NA	NA	0.9989	39	Cargentoratense_DSM44202,"Catypicum_R2070","Caurimucosum_ATCC700975","Cbelfantii_FRC0043","Ccallunae_DSM20147","Ccamporealensis_DSM44610","Cdeserti_GIMN1010","Cdiphtheriae_NCTC11397","Cdoosanense_DSM45436","Cefficiens_YS314","Cepidermidicanis_DSM45586","Cfalsenii_DSM44353","Cglutamicum_ATCC13032","Cglycinophilum_AJ3170","Chalotolerans_YIM70093","Chumireducens_DSM45392","Cimitans_DSM44264","Cjeike…	0.192375	0.192375	1.66788	0.192375	0.192375	1.66789	3330	0
ERS451417_01244	1717.62.peg.1252	NA	NA	NA	0.9989	16	Cbelfantii_FRC0043,"Ccallunae_DSM20147","Cdeserti_GIMN1010","Cdiphtheriae_NCTC11397","Cefficiens_YS314","Cglutamicum_ATCC13032","Chalotolerans_YIM70093","Chumireducens_DSM45392","Cmarinum_DSM44953","Cpseudotuberculosis_31","Cpseudotuberculosis_ATCC19410","Crouxii_FRC0190","Csilvaticum_KL0182","Culcerans_NCTC12077","Culcerans_NCTC7910","Cvitaeruminis_DSM20294"	0.32676	0.32676	1.68164	0.32676	0.32676	1.68164	258	0
ERS451417_02236	1717.62.peg.2261	NA	NA	NA	0.9989	17	Caurimucosum_ATCC700975,"Cbelfantii_FRC0043","Ccamporealensis_DSM44610","Cdiphtheriae_NCTC11397","Cfalsenii_DSM44353","Cglycinophilum_AJ3170","Chalotolerans_YIM70093","Cjeikeium_K41","Ckroppenstedtii_DSM44385","Clactis_RW25","Cpseudotuberculosis_31","Csilvaticum_KL0182","Csimulans_PES1","Cterpenotabidum_Y11","Culcerans_NCTC12077","Culcerans_NCTC7910","Curealyticum_DSM7109"	0.142503	0.142503	2.13082	0.142503	0.142503	2.13082	1026	1	1. 0.45926;2. 95;3. 283;4. 111;5. 111;6. 331;7. 291;8. 871;9. 97;10. V;11. GTC
ERS451417_00451	1717.62.peg.455	NA	NA	NA	0.9989	10	Cbelfantii_FRC0043,"Ccamporealensis_DSM44610","Cdiphtheriae_NCTC11397","Cepidermidicanis_DSM45586","Cpseudotuberculosis_31","Crouxii_FRC0190","Csilvaticum_KL0182","Ctestudinoris_DSM44614","Culcerans_NCTC12077","Culcerans_NCTC7910"	0.162941	0.162941	3.24014	0.162941	0.162941	3.24012	258	0
ERS451417_01513	1717.62.peg.1521	NA	NA	NA	0.9989	14	Cargentoratense_DSM44202,"Cbelfantii_FRC0043","Cdiphtheriae_NCTC11397","Cepidermidicanis_DSM45586","Ckroppenstedtii_DSM44385","Ckutscheri_DSM20755","Clactis_RW25","Cmustelae_DSM45274","Cpseudotuberculosis_31","Cpseudotuberculosis_ATCC19410","Csilvaticum_KL0182","Culcerans_NCTC12077","Culcerans_NCTC7910","Cvitaeruminis_DSM20294"	0.152982	0.152982	2.21958	0.152982	0.152982	2.21958	3074	1	1. 0.4694;2. 229;3. 685;4. 254;5. 254;6. 760;7. 274;8. 820;9. 577;10. L;11. CTC
ERS451417_00402	1717.62.peg.402	NA	NA	NA	0.9989	39	Cargentoratense_DSM44202,"Catypicum_R2070","Caurimucosum_ATCC700975","Cbelfantii_FRC0043","Ccallunae_DSM20147","Ccamporealensis_DSM44610","Cdeserti_GIMN1010","Cdiphtheriae_NCTC11397","Cdoosanense_DSM45436","Cefficiens_YS314","Cepidermidicanis_DSM45586","Cfalsenii_DSM44353","Cglutamicum_ATCC13032","Cglycinophilum_AJ3170","Chalotolerans_YIM70093","Chumireducens_DSM45392","Cimitans_DSM44264","Cjeike…	0.110053	0.110053	2.35315	0.110053	0.110053	2.35314	258	0
ERS451417_01420	1717.62.peg.1426	NA	NA	NA	0.9989	36	Cargentoratense_DSM44202,"Catypicum_R2070","Caurimucosum_ATCC700975","Cbelfantii_FRC0043","Ccallunae_DSM20147","Ccamporealensis_DSM44610","Cdeserti_GIMN1010","Cdiphtheriae_NCTC11397","Cdoosanense_DSM45436","Cefficiens_YS314","Cepidermidicanis_DSM45586","Cfalsenii_DSM44353","Cglutamicum_ATCC13032","Cglycinophilum_AJ3170","Chalotolerans_YIM70093","Chumireducens_DSM45392","Cimitans_DSM44264","Cjeike…	0.157748	0.157748	1.6856	0.157748	0.157748	1.6856	3330	0
ERS451417_00129	1717.62.peg.127	NA	NA	NA	0.9989	39	Cargentoratense_DSM44202,"Catypicum_R2070","Caurimucosum_ATCC700975","Cbelfantii_FRC0043","Ccallunae_DSM20147","Ccamporealensis_DSM44610","Cdeserti_GIMN1010","Cdiphtheriae_NCTC11397","Cdoosanense_DSM45436","Cefficiens_YS314","Cepidermidicanis_DSM45586","Cfalsenii_DSM44353","Cglutamicum_ATCC13032","Cglycinophilum_AJ3170","Chalotolerans_YIM70093","Chumireducens_DSM45392","Cimitans_DSM44264","Cjeike…	0.0977509	0.0977509	1.95402	0.0977509	0.0977509	1.95401	258	0
ERS451417_00404	1717.62.peg.404	NA	NA	NA	0.9989	39	Cargentoratense_DSM44202,"Catypicum_R2070","Caurimucosum_ATCC700975","Cbelfantii_FRC0043","Ccallunae_DSM20147","Ccamporealensis_DSM44610","Cdeserti_GIMN1010","Cdiphtheriae_NCTC11397","Cdoosanense_DSM45436","Cefficiens_YS314","Cepidermidicanis_DSM45586","Cfalsenii_DSM44353","Cglutamicum_ATCC13032","Cglycinophilum_AJ3170","Chalotolerans_YIM70093","Chumireducens_DSM45392","Cimitans_DSM44264","Cjeike…	0.685453	0.254509	2.34406	0.372066	0.254509	2.34406	258	0
ERS451417_00199	1717.62.peg.196	NA	NA	NA	0.9989	39	Cargentoratense_DSM44202,"Catypicum_R2070","Caurimucosum_ATCC700975","Cbelfantii_FRC0043","Ccallunae_DSM20147","Ccamporealensis_DSM44610","Cdeserti_GIMN1010","Cdiphtheriae_NCTC11397","Cdoosanense_DSM45436","Cefficiens_YS314","Cepidermidicanis_DSM45586","Cfalsenii_DSM44353","Cglutamicum_ATCC13032","Cglycinophilum_AJ3170","Chalotolerans_YIM70093","Chumireducens_DSM45392","Cimitans_DSM44264","Cjeike…	0.118854	0.118854	2.06443	0.118854	0.118854	2.06441	258	0
ERS451417_00989	1717.62.peg.1000	NA	NA	NA	0.9989	39	Cargentoratense_DSM44202,"Catypicum_R2070","Caurimucosum_ATCC700975","Cbelfantii_FRC0043","Ccallunae_DSM20147","Ccamporealensis_DSM44610","Cdeserti_GIMN1010","Cdiphtheriae_NCTC11397","Cdoosanense_DSM45436","Cefficiens_YS314","Cepidermidicanis_DSM45586","Cfalsenii_DSM44353","Cglutamicum_ATCC13032","Cglycinophilum_AJ3170","Chalotolerans_YIM70093","Chumireducens_DSM45392","Cimitans_DSM44264","Cjeike…	0.12504	0.12504	1.73471	0.12504	0.12504	1.73471	2	1	1. 0.6124;2. 156;3. 466;4. 165;5. 165;6. 493;7. 205;8. 613;9. 382;10. I;11. ATC
ERS451417_00351	1717.62.peg.354	NA	NA	NA	0.9989	39	Cargentoratense_DSM44202,"Catypicum_R2070","Caurimucosum_ATCC700975","Cbelfantii_FRC0043","Ccallunae_DSM20147","Ccamporealensis_DSM44610","Cdeserti_GIMN1010","Cdiphtheriae_NCTC11397","Cdoosanense_DSM45436","Cefficiens_YS314","Cepidermidicanis_DSM45586","Cfalsenii_DSM44353","Cglutamicum_ATCC13032","Cglycinophilum_AJ3170","Chalotolerans_YIM70093","Chumireducens_DSM45392","Cimitans_DSM44264","Cjeike…	0.250681	0.250681	1.77223	0.250681	0.250681	1.77222	1026	1	1. 0.52266;2. 226;3. 676;4. 272;5. 272;6. 814;7. 424;8. 1270;9. 544;10. D;11. GAT
ERS451417_00328	1717.62.peg.330	NA	NA	NA	0.9989	23	Cbelfantii_FRC0043,"Ccallunae_DSM20147","Cdeserti_GIMN1010","Cdiphtheriae_NCTC11397","Cdoosanense_DSM45436","Cefficiens_YS314","Cepidermidicanis_DSM45586","Cglutamicum_ATCC13032","Chalotolerans_YIM70093","Chumireducens_DSM45392","Cimitans_DSM44264","Ckutscheri_DSM20755","Cmarinum_DSM44953","Cmustelae_DSM45274","Cpseudotuberculosis_31","Cpseudotuberculosis_ATCC19410","Crouxii_FRC0190","Csilvaticum…	0.194566	0.194566	1.58283	0.194566	0.194566	1.58283	3330	0
ERS451417_01530	1717.62.peg.1539	NA	NA	NA	0.9989	38	Cargentoratense_DSM44202,"Catypicum_R2070","Caurimucosum_ATCC700975","Cbelfantii_FRC0043","Ccallunae_DSM20147","Ccamporealensis_DSM44610","Cdeserti_GIMN1010","Cdiphtheriae_NCTC11397","Cdoosanense_DSM45436","Cefficiens_YS314","Cepidermidicanis_DSM45586","Cfalsenii_DSM44353","Cglutamicum_ATCC13032","Cglycinophilum_AJ3170","Chalotolerans_YIM70093","Chumireducens_DSM45392","Cimitans_DSM44264","Cjeike…	0.140861	0.140861	1.58418	0.140861	0.140861	1.58417	258	0
ERS451417_02151	1717.62.peg.2173	NA	NA	NA	0.9989	8	Cbelfantii_FRC0043,"Cdiphtheriae_NCTC11397","Clactis_RW25","Cpseudotuberculosis_31","Cpseudotuberculosis_ATCC19410","Csilvaticum_KL0182","Culcerans_NCTC12077","Culcerans_NCTC7910"	0.0991991	0.0991991	2.52373	0.0991991	0.0991991	2.52373	2	1	1. 0.40367;2. 237;3. 709;4. 285;5. 253;6. 757;7. 273;8. 817;9. 520;10. T;11. ACC
ERS451417_00563	1717.62.peg.566	NA	NA	NA	0.9989	39	Cargentoratense_DSM44202,"Catypicum_R2070","Caurimucosum_ATCC700975","Cbelfantii_FRC0043","Ccallunae_DSM20147","Ccamporealensis_DSM44610","Cdeserti_GIMN1010","Cdiphtheriae_NCTC11397","Cdoosanense_DSM45436","Cefficiens_YS314","Cepidermidicanis_DSM45586","Cfalsenii_DSM44353","Cglutamicum_ATCC13032","Cglycinophilum_AJ3170","Chalotolerans_YIM70093","Chumireducens_DSM45392","Cimitans_DSM44264","Cjeike…	0.152976	0.152976	1.67293	0.152976	0.152976	1.67293	2	1	1. 0.40571;2. 69;3. 205;4. 69;5. 69;6. 205;7. 70;8. 208;9. 169;10. E;11. GAG
ERS451417_00131	1717.62.peg.130	NA	NA	NA	0.9989	8	Cbelfantii_FRC0043,"Cdiphtheriae_NCTC11397","Cpseudotuberculosis_31","Cpseudotuberculosis_ATCC19410","Crouxii_FRC0190","Csilvaticum_KL0182","Culcerans_NCTC12077","Culcerans_NCTC7910"	0.334453	0.334453	5.26146	0.334453	0.334453	5.26148	258	0
ERS451417_00512	1717.62.peg.516	NA	NA	NA	0.9989	8	Cbelfantii_FRC0043,"Cdiphtheriae_NCTC11397","Cpseudotuberculosis_31","Cpseudotuberculosis_ATCC19410","Crouxii_FRC0190","Csilvaticum_KL0182","Culcerans_NCTC12077","Culcerans_NCTC7910"	0.0801617	0.0801617	3.74579	0.0801617	0.0801617	3.74579	2050	3	1. 0.43211;2. 88;3. 262;4. 128;5. 88;6. 262;7. 88;8. 262;9. 232;10. F;11. TTC	1. 0.47688;2. 239;3. 715;4. 364;5. 239;6. 715;7. 246;8. 736;9. 589;10. T;11. ACG	1. 0.4193;2. 272;3. 814;4. 403;5. 272;6. 814;7. 290;8. 868;9. 679;10. P;11. CCA
ERS451417_00974	1717.62.peg.984	NA	NA	NA	0.9989	36	Cargentoratense_DSM44202,"Catypicum_R2070","Caurimucosum_ATCC700975","Cbelfantii_FRC0043","Ccallunae_DSM20147","Ccamporealensis_DSM44610","Cdeserti_GIMN1010","Cdiphtheriae_NCTC11397","Cdoosanense_DSM45436","Cefficiens_YS314","Cepidermidicanis_DSM45586","Cfalsenii_DSM44353","Cglutamicum_ATCC13032","Chalotolerans_YIM70093","Chumireducens_DSM45392","Cimitans_DSM44264","Cjeikeium_K41","Ckroppenstedti…	0.185652	0.185652	1.60751	0.185652	0.185652	1.60751	2050	1	1. 0.43145;2. 604;3. 1810;4. 639;5. 619;6. 1855;7. 704;8. 2110;9. 1396;10. I;11. ATC
ERS451417_01523	1717.62.peg.1532	NA	NA	NA	0.9989	35	Cargentoratense_DSM44202,"Catypicum_R2070","Caurimucosum_ATCC700975","Cbelfantii_FRC0043","Ccallunae_DSM20147","Ccamporealensis_DSM44610","Cdeserti_GIMN1010","Cdiphtheriae_NCTC11397","Cdoosanense_DSM45436","Cefficiens_YS314","Cepidermidicanis_DSM45586","Cfalsenii_DSM44353","Cglutamicum_ATCC13032","Cglycinophilum_AJ3170","Chalotolerans_YIM70093","Chumireducens_DSM45392","Cimitans_DSM44264","Cjeike…	0.0670995	0.0670995	1.98182	0.0670995	0.0670995	1.98181	258	0
ERS451417_02064	1717.62.peg.2076	NA	NA	NA	0.9989	7	Cbelfantii_FRC0043,"Cdiphtheriae_NCTC11397","Cpseudotuberculosis_31","Cpseudotuberculosis_ATCC19410","Csilvaticum_KL0182","Culcerans_NCTC12077","Culcerans_NCTC7910"	0.0753718	0.0753718	3.25059	0.0753623	0.0753623	3.25061	2	2	1. 0.46089;2. 69;3. 205;4. 69;5. 69;6. 205;7. 69;8. 205;9. 205;10. I;11. ATT	1. 0.4397;2. 71;3. 211;4. 71;5. 71;6. 211;7. 71;8. 211;9. 211;10. T;11. ACT
ERS451417_01431	1717.62.peg.1437	NA	NA	NA	0.9989	38	Cargentoratense_DSM44202,"Catypicum_R2070","Caurimucosum_ATCC700975","Cbelfantii_FRC0043","Ccallunae_DSM20147","Ccamporealensis_DSM44610","Cdeserti_GIMN1010","Cdiphtheriae_NCTC11397","Cdoosanense_DSM45436","Cefficiens_YS314","Cepidermidicanis_DSM45586","Cfalsenii_DSM44353","Cglutamicum_ATCC13032","Cglycinophilum_AJ3170","Chalotolerans_YIM70093","Chumireducens_DSM45392","Cimitans_DSM44264","Cjeike…	0.067254	0.067254	1.39391	0.067254	0.067254	1.39391	1026	1	1. 0.47903;2. 561;3. 1681;4. 612;5. 612;6. 1834;7. 824;8. 2470;9. 1402;10. A;11. GCG
ERS451417_01440	1717.62.peg.1447	NA	NA	NA	0.9989	37	Cargentoratense_DSM44202,"Catypicum_R2070","Caurimucosum_ATCC700975","Cbelfantii_FRC0043","Ccallunae_DSM20147","Ccamporealensis_DSM44610","Cdeserti_GIMN1010","Cdiphtheriae_NCTC11397","Cdoosanense_DSM45436","Cefficiens_YS314","Cepidermidicanis_DSM45586","Cfalsenii_DSM44353","Cglutamicum_ATCC13032","Cglycinophilum_AJ3170","Chalotolerans_YIM70093","Chumireducens_DSM45392","Cimitans_DSM44264","Cjeike…	0.110364	0.110364	1.49577	0.110364	0.110364	1.49577	258	0
ERS451417_02238	1717.62.peg.2263	NA	NA	NA	0.9989	38	Cargentoratense_DSM44202,"Catypicum_R2070","Caurimucosum_ATCC700975","Cbelfantii_FRC0043","Ccallunae_DSM20147","Ccamporealensis_DSM44610","Cdeserti_GIMN1010","Cdiphtheriae_NCTC11397","Cdoosanense_DSM45436","Cefficiens_YS314","Cepidermidicanis_DSM45586","Cfalsenii_DSM44353","Cglutamicum_ATCC13032","Cglycinophilum_AJ3170","Chalotolerans_YIM70093","Chumireducens_DSM45392","Cimitans_DSM44264","Cjeike…	0.105175	0.105175	1.60898	0.105175	0.105175	1.609	258	0
ERS451417_02022	1717.62.peg.2027	NA	NA	NA	0.9989	38	Cargentoratense_DSM44202,"Catypicum_R2070","Caurimucosum_ATCC700975","Cbelfantii_FRC0043","Ccallunae_DSM20147","Ccamporealensis_DSM44610","Cdeserti_GIMN1010","Cdiphtheriae_NCTC11397","Cdoosanense_DSM45436","Cefficiens_YS314","Cepidermidicanis_DSM45586","Cfalsenii_DSM44353","Cglutamicum_ATCC13032","Cglycinophilum_AJ3170","Chalotolerans_YIM70093","Chumireducens_DSM45392","Cimitans_DSM44264","Cjeike…	0.136098	0.136098	1.88219	0.136098	0.136098	1.88219	258	0
ERS451417_01212	1717.62.peg.1220	NA	NA	NA	0.9989	39	Cargentoratense_DSM44202,"Catypicum_R2070","Caurimucosum_ATCC700975","Cbelfantii_FRC0043","Ccallunae_DSM20147","Ccamporealensis_DSM44610","Cdeserti_GIMN1010","Cdiphtheriae_NCTC11397","Cdoosanense_DSM45436","Cefficiens_YS314","Cepidermidicanis_DSM45586","Cfalsenii_DSM44353","Cglutamicum_ATCC13032","Cglycinophilum_AJ3170","Chalotolerans_YIM70093","Chumireducens_DSM45392","Cimitans_DSM44264","Cjeike…	0.141219	0.141219	1.91416	0.141219	0.141219	1.91416	2	1	1. 0.52658;2. 9;3. 25;4. 25;5. 25;6. 73;7. 95;8. 283;9. 4;10. Q;11. CAG
ERS451417_01648	1717.62.peg.1655	NA	NA	NA	0.9989	38	Cargentoratense_DSM44202,"Catypicum_R2070","Caurimucosum_ATCC700975","Cbelfantii_FRC0043","Ccallunae_DSM20147","Ccamporealensis_DSM44610","Cdeserti_GIMN1010","Cdiphtheriae_NCTC11397","Cdoosanense_DSM45436","Cefficiens_YS314","Cepidermidicanis_DSM45586","Cfalsenii_DSM44353","Cglutamicum_ATCC13032","Cglycinophilum_AJ3170","Chalotolerans_YIM70093","Chumireducens_DSM45392","Cimitans_DSM44264","Cjeike…	0.116381	0.116381	1.68437	0.116381	0.116381	1.68437	2	1	1. 0.45016;2. 262;3. 784;4. 267;5. 267;6. 799;7. 278;8. 832;9. 769;10. V;11. GTT
ERS451417_01700	1717.62.peg.1706	NA	NA	NA	0.9989	38	Cargentoratense_DSM44202,"Catypicum_R2070","Caurimucosum_ATCC700975","Cbelfantii_FRC0043","Ccallunae_DSM20147","Ccamporealensis_DSM44610","Cdeserti_GIMN1010","Cdiphtheriae_NCTC11397","Cdoosanense_DSM45436","Cefficiens_YS314","Cepidermidicanis_DSM45586","Cfalsenii_DSM44353","Cglutamicum_ATCC13032","Cglycinophilum_AJ3170","Chalotolerans_YIM70093","Chumireducens_DSM45392","Cimitans_DSM44264","Cjeike…	0.124964	0.124964	1.71433	0.124964	0.124964	1.71433	2	3	1. 0.87676;2. 483;3. 1447;4. 499;5. 499;6. 1495;7. 562;8. 1684;9. 1384;10. S;11. TCT	1. 0.56031;2. 712;3. 2134;4. 736;5. 736;6. 2206;7. 802;8. 2404;9. 2020;10. V;11. GTG	1. 0.5474;2. 891;3. 2671;4. 933;5. 933;6. 2797;7. 1010;8. 3028;9. 2494;10. I;11. ATT
ERS451417_01329	1717.62.peg.1337	NA	NA	NA	0.9989	38	Cargentoratense_DSM44202,"Catypicum_R2070","Caurimucosum_ATCC700975","Cbelfantii_FRC0043","Ccallunae_DSM20147","Ccamporealensis_DSM44610","Cdeserti_GIMN1010","Cdiphtheriae_NCTC11397","Cdoosanense_DSM45436","Cefficiens_YS314","Cepidermidicanis_DSM45586","Cfalsenii_DSM44353","Cglutamicum_ATCC13032","Cglycinophilum_AJ3170","Chalotolerans_YIM70093","Chumireducens_DSM45392","Cimitans_DSM44264","Cjeike…	0.316546	0.0896308	1.93736	0.173387	0.0896308	1.93736	258	0
ERS451417_01531	1717.62.peg.1540	NA	NA	NA	0.9989	38	Cargentoratense_DSM44202,"Catypicum_R2070","Caurimucosum_ATCC700975","Cbelfantii_FRC0043","Ccallunae_DSM20147","Ccamporealensis_DSM44610","Cdeserti_GIMN1010","Cdiphtheriae_NCTC11397","Cdoosanense_DSM45436","Cefficiens_YS314","Cepidermidicanis_DSM45586","Cfalsenii_DSM44353","Cglutamicum_ATCC13032","Cglycinophilum_AJ3170","Chalotolerans_YIM70093","Chumireducens_DSM45392","Cimitans_DSM44264","Cjeike…	0.119429	0.119429	1.88061	0.119429	0.119429	1.88061	258	0
ERS451417_01437	1717.62.peg.1444	NA	NA	NA	1	37	Cargentoratense_DSM44202,"Catypicum_R2070","Caurimucosum_ATCC700975","Cbelfantii_FRC0043","Ccallunae_DSM20147","Ccamporealensis_DSM44610","Cdeserti_GIMN1010","Cdiphtheriae_NCTC11397","Cdoosanense_DSM45436","Cefficiens_YS314","Cepidermidicanis_DSM45586","Cfalsenii_DSM44353","Cglutamicum_ATCC13032","Cglycinophilum_AJ3170","Chalotolerans_YIM70093","Chumireducens_DSM45392","Cimitans_DSM44264","Cjeike…	2.99284	0.173915	1.59355	0.173916	0.173916	1.59377	256	0
ERS451417_00459	1717.62.peg.463	NA	NA	NA	1	39	Cargentoratense_DSM44202,"Catypicum_R2070","Caurimucosum_ATCC700975","Cbelfantii_FRC0043","Ccallunae_DSM20147","Ccamporealensis_DSM44610","Cdeserti_GIMN1010","Cdiphtheriae_NCTC11397","Cdoosanense_DSM45436","Cefficiens_YS314","Cepidermidicanis_DSM45586","Cfalsenii_DSM44353","Cglutamicum_ATCC13032","Cglycinophilum_AJ3170","Chalotolerans_YIM70093","Chumireducens_DSM45392","Cimitans_DSM44264","Cjeike…	0.557165	0.186472	1.8279	0.323414	0.186472	1.8279	258	0
ERS451417_00385	1717.62.peg.385	NA	NA	NA	1	7	Cbelfantii_FRC0043,"Cdiphtheriae_NCTC11397","Cpseudotuberculosis_ATCC19410","Crouxii_FRC0190","Csilvaticum_KL0182","Culcerans_NCTC12077","Culcerans_NCTC7910"	0.310519	0.310519	3.27018	0.310519	0.310519	3.27017	2	1	1. 0.40753;2. 194;3. 580;4. 265;5. 212;6. 634;7. 218;8. 652;9. 448;10. V;11. GTG
ERS451417_00771	1717.62.peg.776	NA	NA	NA	1	38	Cargentoratense_DSM44202,"Catypicum_R2070","Caurimucosum_ATCC700975","Cbelfantii_FRC0043","Ccallunae_DSM20147","Ccamporealensis_DSM44610","Cdeserti_GIMN1010","Cdiphtheriae_NCTC11397","Cdoosanense_DSM45436","Cefficiens_YS314","Cepidermidicanis_DSM45586","Cfalsenii_DSM44353","Cglutamicum_ATCC13032","Cglycinophilum_AJ3170","Chalotolerans_YIM70093","Chumireducens_DSM45392","Cimitans_DSM44264","Cjeike…	0.15587	0.132969	2.30517	0.15587	0.132969	2.30517	2050	2	1. 0.42267;2. 112;3. 334;4. 122;5. 122;6. 364;7. 126;8. 376;9. 262;10. A;11. GCG	1. 0.48741;2. 116;3. 346;4. 126;5. 126;6. 376;7. 130;8. 388;9. 274;10. L;11. TTG
ERS451417_01601	1717.62.peg.1610	NA	NA	NA	1	32	Cargentoratense_DSM44202,"Catypicum_R2070","Caurimucosum_ATCC700975","Cbelfantii_FRC0043","Ccallunae_DSM20147","Ccamporealensis_DSM44610","Cdeserti_GIMN1010","Cdiphtheriae_NCTC11397","Cdoosanense_DSM45436","Cefficiens_YS314","Cepidermidicanis_DSM45586","Cglutamicum_ATCC13032","Chalotolerans_YIM70093","Chumireducens_DSM45392","Cimitans_DSM44264","Ckutscheri_DSM20755","Clactis_RW25","Cmarinum_DSM44…	0.174403	0.174403	1.91759	0.174403	0.174403	1.91759	258	0
ERS451417_00548	1717.62.peg.552	NA	NA	NA	1	13	Cargentoratense_DSM44202,"Cbelfantii_FRC0043","Cdiphtheriae_NCTC11397","Ckutscheri_DSM20755","Clactis_RW25","Cmustelae_DSM45274","Cpseudotuberculosis_31","Cpseudotuberculosis_ATCC19410","Crouxii_FRC0190","Csilvaticum_KL0182","Culcerans_NCTC12077","Culcerans_NCTC7910","Curealyticum_DSM7109"	0.0993446	0.0993446	2.39994	0.0993446	0.0993446	2.39994	2	1	1. 0.47907;2. 65;3. 193;4. 66;5. 66;6. 196;7. 71;8. 211;9. 148;10. I;11. ATC
ERS451417_00757	1717.62.peg.762	NA	NA	NA	1	39	Cargentoratense_DSM44202,"Catypicum_R2070","Caurimucosum_ATCC700975","Cbelfantii_FRC0043","Ccallunae_DSM20147","Ccamporealensis_DSM44610","Cdeserti_GIMN1010","Cdiphtheriae_NCTC11397","Cdoosanense_DSM45436","Cefficiens_YS314","Cepidermidicanis_DSM45586","Cfalsenii_DSM44353","Cglutamicum_ATCC13032","Cglycinophilum_AJ3170","Chalotolerans_YIM70093","Chumireducens_DSM45392","Cimitans_DSM44264","Cjeike…	0.156833	0.156833	2.32821	0.156833	0.156833	2.32821	258	0
ERS451417_02059	1717.62.peg.2071	NA	NA	NA	1	38	Cargentoratense_DSM44202,"Catypicum_R2070","Caurimucosum_ATCC700975","Cbelfantii_FRC0043","Ccallunae_DSM20147","Ccamporealensis_DSM44610","Cdeserti_GIMN1010","Cdiphtheriae_NCTC11397","Cdoosanense_DSM45436","Cefficiens_YS314","Cepidermidicanis_DSM45586","Cfalsenii_DSM44353","Cglutamicum_ATCC13032","Cglycinophilum_AJ3170","Chalotolerans_YIM70093","Chumireducens_DSM45392","Cimitans_DSM44264","Cjeike…	0.175681	0.175681	1.95789	0.175681	0.175681	1.95789	2	1	1. 0.53203;2. 308;3. 922;4. 337;5. 337;6. 1009;7. 377;8. 1129;9. 778;10. I;11. ATC
ERS451417_01706	1717.62.peg.1711	NA	NA	NA	1	22	Catypicum_R2070,"Caurimucosum_ATCC700975","Cbelfantii_FRC0043","Ccallunae_DSM20147","Cdeserti_GIMN1010","Cdiphtheriae_NCTC11397","Cefficiens_YS314","Cglutamicum_ATCC13032","Chalotolerans_YIM70093","Chumireducens_DSM45392","Cimitans_DSM44264","Ckroppenstedtii_DSM44385","Cmarinum_DSM44953","Cpseudotuberculosis_31","Cpseudotuberculosis_ATCC19410","Csilvaticum_KL0182","Csimulans_PES1","Csingulare_IBS…	0.116425	0.116425	1.89754	0.116425	0.116425	1.89755	2	1	1. 0.60241;2. 108;3. 322;4. 155;5. 155;6. 463;7. 161;8. 481;9. 295;10. D;11. GAC
ERS451417_00077	1717.62.peg.74	NA	NA	NA	1	35	Cargentoratense_DSM44202,"Caurimucosum_ATCC700975","Cbelfantii_FRC0043","Ccallunae_DSM20147","Cdeserti_GIMN1010","Cdiphtheriae_NCTC11397","Cdoosanense_DSM45436","Cefficiens_YS314","Cepidermidicanis_DSM45586","Cfalsenii_DSM44353","Cglutamicum_ATCC13032","Cglycinophilum_AJ3170","Chalotolerans_YIM70093","Chumireducens_DSM45392","Cimitans_DSM44264","Cjeikeium_K41","Ckroppenstedtii_DSM44385","Ckutsche…	0.121519	0.121519	1.94987	0.121519	0.121519	1.94987	258	0
ERS451417_00847	1717.62.peg.852	NA	NA	NA	1	36	Cargentoratense_DSM44202,"Catypicum_R2070","Caurimucosum_ATCC700975","Cbelfantii_FRC0043","Ccallunae_DSM20147","Ccamporealensis_DSM44610","Cdeserti_GIMN1010","Cdiphtheriae_NCTC11397","Cdoosanense_DSM45436","Cefficiens_YS314","Cepidermidicanis_DSM45586","Cfalsenii_DSM44353","Cglutamicum_ATCC13032","Cglycinophilum_AJ3170","Chalotolerans_YIM70093","Chumireducens_DSM45392","Cimitans_DSM44264","Cjeike…	0.116338	0.116338	1.74858	0.116338	0.116338	1.74858	1026	4	1. 0.54503;2. 167;3. 499;4. 208;5. 208;6. 622;7. 330;8. 988;9. 388;10. D;11. GAC	1. 0.54673;2. 206;3. 616;4. 248;5. 248;6. 742;7. 371;8. 1111;9. 484;10. Q;11. CAA	1. 0.56;2. 276;3. 826;4. 318;5. 318;6. 952;7. 441;8. 1321;9. 694;10. G;11. GGT	1. 0.56654;2. 282;3. 844;4. 324;5. 324;6. 970;7. 447;8. 1339;9. 712;10. V;11. GTA
ERS451417_01491	1717.62.peg.1499	NA	NA	NA	1	38	Cargentoratense_DSM44202,"Catypicum_R2070","Caurimucosum_ATCC700975","Cbelfantii_FRC0043","Ccallunae_DSM20147","Ccamporealensis_DSM44610","Cdeserti_GIMN1010","Cdiphtheriae_NCTC11397","Cdoosanense_DSM45436","Cefficiens_YS314","Cepidermidicanis_DSM45586","Cfalsenii_DSM44353","Cglutamicum_ATCC13032","Cglycinophilum_AJ3170","Chalotolerans_YIM70093","Chumireducens_DSM45392","Cimitans_DSM44264","Cjeike…	0.214228	0.214228	1.79328	0.214228	0.214228	1.79329	2050	1	1. 0.57791;2. 176;3. 526;4. 181;5. 181;6. 541;7. 189;8. 565;9. 457;10. A;11. GCG
ERS451417_01680	1717.62.peg.1687	NA	NA	NA	1	38	Cargentoratense_DSM44202,"Catypicum_R2070","Caurimucosum_ATCC700975","Cbelfantii_FRC0043","Ccallunae_DSM20147","Ccamporealensis_DSM44610","Cdeserti_GIMN1010","Cdiphtheriae_NCTC11397","Cdoosanense_DSM45436","Cefficiens_YS314","Cepidermidicanis_DSM45586","Cfalsenii_DSM44353","Cglutamicum_ATCC13032","Cglycinophilum_AJ3170","Chalotolerans_YIM70093","Chumireducens_DSM45392","Cimitans_DSM44264","Cjeike…	0.208425	0.208425	1.64923	0.208425	0.208425	1.64923	3074	11	1. 0.47337;2. 52;3. 154;4. 67;5. 67;6. 199;7. 88;8. 262;9. 16;10. T;11. ACT	1. 0.50453;2. 94;3. 280;4. 176;5. 176;6. 526;7. 246;8. 736;9. 82;10. L;11. CTT	1. 0.42365;2. 105;3. 313;4. 187;5. 187;6. 559;7. 257;8. 769;9. 115;10. V;11. GTA	1. 0.45542;2. 197;3. 589;4. 301;5. 301;6. 901;7. 486;8. 1456;9. 163;10. L;11. TTG	1. 0.96466;2. 284;3. 850;4. 432;5. 432;6. 1294;7. 637;8. 1909;9. 310;10. V;11. GTT	1. 0.4206;2. 332;3. 994;4. 480;5. 480;6. 1438;7. 685;8. 2053;9. 454;10. V;11. GTG	1. 0.49333;2. 486;3. 1456;4. 635;5. 635;6. 1903;7. 840;8. 2518;9. 910;10. T;11. ACG	1. 0.41293;2. 552;3. 1654;4. 706;5. 706;6. 2116;7. 911;8. 2731;9. 1066;10. A;11. GCA	1. 0.44431;2. 692;3. 2074;4. 847;5. 847;6. 2539;7. 1052;8. 3154;9. 1483;10. D;11. GAT	1. 0.66645;2. 807;3. 2419;4. 1024;5. 1024;6. 3070;7. 1261;8. 3781;9. 1735;10. V;11. GTA	1. 0.40373;2. 957;3. 2869;4. 1174;5. 1174;6. 3520;7. 1411;8. 4231;9. 2179;10. D;11. GAC
ERS451417_01345	1717.62.peg.1353	NA	NA	NA	1	38	Cargentoratense_DSM44202,"Catypicum_R2070","Caurimucosum_ATCC700975","Cbelfantii_FRC0043","Ccallunae_DSM20147","Ccamporealensis_DSM44610","Cdeserti_GIMN1010","Cdiphtheriae_NCTC11397","Cdoosanense_DSM45436","Cefficiens_YS314","Cepidermidicanis_DSM45586","Cfalsenii_DSM44353","Cglutamicum_ATCC13032","Cglycinophilum_AJ3170","Chalotolerans_YIM70093","Chumireducens_DSM45392","Cimitans_DSM44264","Cjeike…	0.143881	0.143881	1.73145	0.143881	0.143881	1.73145	3330	0
ERS451417_00643	1717.62.peg.647	NA	NA	NA	1	19	Cargentoratense_DSM44202,"Caurimucosum_ATCC700975","Cbelfantii_FRC0043","Cdiphtheriae_NCTC11397","Cepidermidicanis_DSM45586","Chalotolerans_YIM70093","Chumireducens_DSM45392","Ckutscheri_DSM20755","Cmustelae_DSM45274","Cpseudotuberculosis_31","Cpseudotuberculosis_ATCC19410","Crouxii_FRC0190","Csilvaticum_KL0182","Csimulans_PES1","Csingulare_IBSB52218","Ctestudinoris_DSM44614","Culcerans_NCTC12077…	0.0760268	0.0760268	1.51677	0.0760268	0.0760268	1.51676	2	1	1. 0.42918;2. 33;3. 97;4. 81;5. 54;6. 160;7. 59;8. 175;9. 70;10. D;11. GAC
ERS451417_00567	1717.62.peg.570	NA	NA	NA	1	39	Cargentoratense_DSM44202,"Catypicum_R2070","Caurimucosum_ATCC700975","Cbelfantii_FRC0043","Ccallunae_DSM20147","Ccamporealensis_DSM44610","Cdeserti_GIMN1010","Cdiphtheriae_NCTC11397","Cdoosanense_DSM45436","Cefficiens_YS314","Cepidermidicanis_DSM45586","Cfalsenii_DSM44353","Cglutamicum_ATCC13032","Cglycinophilum_AJ3170","Chalotolerans_YIM70093","Chumireducens_DSM45392","Cimitans_DSM44264","Cjeike…	0.0844004	0.0844004	1.5447	0.0844004	0.0844004	1.5447	258	0
ERS451417_01635	1717.62.peg.1642	NA	NA	NA	1	22	Cargentoratense_DSM44202,"Cbelfantii_FRC0043","Ccallunae_DSM20147","Cdeserti_GIMN1010","Cdiphtheriae_NCTC11397","Cefficiens_YS314","Cepidermidicanis_DSM45586","Cfalsenii_DSM44353","Cglutamicum_ATCC13032","Cglycinophilum_AJ3170","Cjeikeium_K41","Ckroppenstedtii_DSM44385","Clactis_RW25","Cmustelae_DSM45274","Cpseudotuberculosis_31","Cpseudotuberculosis_ATCC19410","Csilvaticum_KL0182","Cterpenotabid…	0.207737	0.151383	1.92294	0.207737	0.151383	1.92294	3074	3	1. 0.49629;2. 83;3. 247;4. 117;5. 107;6. 319;7. 200;8. 598;9. 151;10. H;11. CAT	1. 0.60081;2. 159;3. 475;4. 200;5. 183;6. 547;7. 279;8. 835;9. 325;10. Q;11. CAG	1. 0.54777;2. 202;3. 604;4. 243;5. 226;6. 676;7. 322;8. 964;9. 454;10. D;11. GAT
ERS451417_00471	1717.62.peg.475	NA	NA	NA	1	15	Caurimucosum_ATCC700975,"Cbelfantii_FRC0043","Ccallunae_DSM20147","Cdiphtheriae_NCTC11397","Cglutamicum_ATCC13032","Cimitans_DSM44264","Ckutscheri_DSM20755","Clactis_RW25","Cpseudotuberculosis_31","CriegeliiPUDD83A45","Crouxii_FRC0190","Csilvaticum_KL0182","Culcerans_NCTC12077","Culcerans_NCTC7910","Cvitaeruminis_DSM20294"	0.237135	0.237135	2.41778	0.237135	0.237135	2.41778	258	0
ERS451417_00458	1717.62.peg.462	NA	NA	NA	1	39	Cargentoratense_DSM44202,"Catypicum_R2070","Caurimucosum_ATCC700975","Cbelfantii_FRC0043","Ccallunae_DSM20147","Ccamporealensis_DSM44610","Cdeserti_GIMN1010","Cdiphtheriae_NCTC11397","Cdoosanense_DSM45436","Cefficiens_YS314","Cepidermidicanis_DSM45586","Cfalsenii_DSM44353","Cglutamicum_ATCC13032","Cglycinophilum_AJ3170","Chalotolerans_YIM70093","Chumireducens_DSM45392","Cimitans_DSM44264","Cjeike…	0.199433	0.199433	1.86961	0.199433	0.199433	1.86961	258	0
ERS451417_01301	1717.62.peg.1309	NA	NA	NA	1	38	Cargentoratense_DSM44202,"Catypicum_R2070","Caurimucosum_ATCC700975","Cbelfantii_FRC0043","Ccallunae_DSM20147","Ccamporealensis_DSM44610","Cdeserti_GIMN1010","Cdiphtheriae_NCTC11397","Cdoosanense_DSM45436","Cefficiens_YS314","Cepidermidicanis_DSM45586","Cfalsenii_DSM44353","Cglutamicum_ATCC13032","Cglycinophilum_AJ3170","Chalotolerans_YIM70093","Chumireducens_DSM45392","Cimitans_DSM44264","Cjeike…	0.122543	0.122543	1.60393	0.122543	0.122543	1.60393	258	0
ERS451417_01809	1717.62.peg.1815	NA	NA	NA	1	38	Cargentoratense_DSM44202,"Catypicum_R2070","Caurimucosum_ATCC700975","Cbelfantii_FRC0043","Ccallunae_DSM20147","Ccamporealensis_DSM44610","Cdeserti_GIMN1010","Cdiphtheriae_NCTC11397","Cdoosanense_DSM45436","Cefficiens_YS314","Cepidermidicanis_DSM45586","Cfalsenii_DSM44353","Cglutamicum_ATCC13032","Cglycinophilum_AJ3170","Chalotolerans_YIM70093","Chumireducens_DSM45392","Cimitans_DSM44264","Cjeike…	0.241448	0.241448	1.5767	0.241448	0.241448	1.5767	1282	0
ERS451417_00455	1717.62.peg.459	NA	NA	NA	1	30	Caurimucosum_ATCC700975,"Cbelfantii_FRC0043","Ccallunae_DSM20147","Ccamporealensis_DSM44610","Cdeserti_GIMN1010","Cdiphtheriae_NCTC11397","Cefficiens_YS314","Cepidermidicanis_DSM45586","Cglutamicum_ATCC13032","Cglycinophilum_AJ3170","Chalotolerans_YIM70093","Chumireducens_DSM45392","Ckroppenstedtii_DSM44385","Ckutscheri_DSM20755","Cmarinum_DSM44953","Cmaris_DSM45190","Cmustelae_DSM45274","Cpseudo…	0.229024	0.229024	1.92479	0.229024	0.229024	1.9248	3330	0
ERS451417_02206	1717.62.peg.2231	NA	NA	NA	1	9	Cbelfantii_FRC0043,"Cdiphtheriae_NCTC11397","Cmustelae_DSM45274","Cpseudotuberculosis_31","Cpseudotuberculosis_ATCC19410","Csilvaticum_KL0182","Culcerans_NCTC12077","Culcerans_NCTC7910","Cvitaeruminis_DSM20294"	0.130431	0.130431	2.56521	0.130431	0.130431	2.56521	2	2	1. 0.41864;2. 39;3. 115;4. 65;5. 63;6. 187;7. 92;8. 274;9. 79;10. G;11. GGT	1. 0.58497;2. 99;3. 295;4. 156;5. 133;6. 397;7. 162;8. 484;9. 256;10. R;11. CGG
ERS451417_00863	1717.62.peg.868	NA	NA	NA	1	33	Cargentoratense_DSM44202,"Catypicum_R2070","Caurimucosum_ATCC700975","Cbelfantii_FRC0043","Ccallunae_DSM20147","Ccamporealensis_DSM44610","Cdeserti_GIMN1010","Cdiphtheriae_NCTC11397","Cdoosanense_DSM45436","Cefficiens_YS314","Cepidermidicanis_DSM45586","Cfalsenii_DSM44353","Cglutamicum_ATCC13032","Cglycinophilum_AJ3170","Chumireducens_DSM45392","Cimitans_DSM44264","Ckroppenstedtii_DSM44385","Ckut…	0.155654	0.155654	2.16708	0.155654	0.155654	2.16708	7170	1	1. 0.40361;2. 425;3. 1273;4. 540;5. 499;6. 1495;7. 669;8. 2005;9. 946;10. E;11. GAG
ERS451417_01881	1717.62.peg.1882	NA	NA	NA	1	16	Cargentoratense_DSM44202,"Cbelfantii_FRC0043","Cdiphtheriae_NCTC11397","Cepidermidicanis_DSM45586","Chalotolerans_YIM70093","Chumireducens_DSM45392","Cmarinum_DSM44953","Cmustelae_DSM45274","Cpseudotuberculosis_31","Cpseudotuberculosis_ATCC19410","Csilvaticum_KL0182","Csingulare_IBSB52218","Ctestudinoris_DSM44614","Culcerans_NCTC12077","Culcerans_NCTC7910","Cvitaeruminis_DSM20294"	0.253407	0.230537	1.56838	0.253407	0.230537	1.56838	2	2	1. 0.57274;2. 187;3. 559;4. 216;5. 201;6. 601;7. 206;8. 616;9. 460;10. E;11. GAG	1. 0.46717;2. 210;3. 628;4. 239;5. 224;6. 670;7. 229;8. 685;9. 526;10. K;11. AAG
ERS451417_00262	1717.62.peg.256	NA	NA	NA	1	39	Cargentoratense_DSM44202,"Catypicum_R2070","Caurimucosum_ATCC700975","Cbelfantii_FRC0043","Ccallunae_DSM20147","Ccamporealensis_DSM44610","Cdeserti_GIMN1010","Cdiphtheriae_NCTC11397","Cdoosanense_DSM45436","Cefficiens_YS314","Cepidermidicanis_DSM45586","Cfalsenii_DSM44353","Cglutamicum_ATCC13032","Cglycinophilum_AJ3170","Chalotolerans_YIM70093","Chumireducens_DSM45392","Cimitans_DSM44264","Cjeike…	0.167902	0.167902	2.26494	0.167902	0.167902	2.26493	2050	1	1. 0.48516;2. 331;3. 991;4. 355;5. 355;6. 1063;7. 395;8. 1183;9. 664;10. V;11. GTG
ERS451417_02173	1717.62.peg.2199	NA	NA	NA	1	38	Cargentoratense_DSM44202,"Catypicum_R2070","Caurimucosum_ATCC700975","Cbelfantii_FRC0043","Ccallunae_DSM20147","Ccamporealensis_DSM44610","Cdeserti_GIMN1010","Cdiphtheriae_NCTC11397","Cdoosanense_DSM45436","Cefficiens_YS314","Cepidermidicanis_DSM45586","Cfalsenii_DSM44353","Cglutamicum_ATCC13032","Cglycinophilum_AJ3170","Chalotolerans_YIM70093","Chumireducens_DSM45392","Cimitans_DSM44264","Cjeike…	0.0672701	0.0672701	1.84568	0.0672701	0.0672701	1.84568	1282	0
ERS451417_00284	1717.62.peg.285	NA	NA	NA	1	39	Cargentoratense_DSM44202,"Catypicum_R2070","Caurimucosum_ATCC700975","Cbelfantii_FRC0043","Ccallunae_DSM20147","Ccamporealensis_DSM44610","Cdeserti_GIMN1010","Cdiphtheriae_NCTC11397","Cdoosanense_DSM45436","Cefficiens_YS314","Cepidermidicanis_DSM45586","Cfalsenii_DSM44353","Cglutamicum_ATCC13032","Cglycinophilum_AJ3170","Chalotolerans_YIM70093","Chumireducens_DSM45392","Cimitans_DSM44264","Cjeike…	0.209542	0.209542	1.85161	0.209542	0.209542	1.85161	2	1	1. 0.42532;2. 180;3. 538;4. 200;5. 200;6. 598;7. 200;8. 598;9. 511;10. V;11. GTC
ERS451417_01189	1717.62.peg.1198	NA	NA	NA	1	24	Cargentoratense_DSM44202,"Cbelfantii_FRC0043","Cdiphtheriae_NCTC11397","Cefficiens_YS314","Cepidermidicanis_DSM45586","Cfalsenii_DSM44353","Cglutamicum_ATCC13032","Cglycinophilum_AJ3170","Chumireducens_DSM45392","Cimitans_DSM44264","Ckroppenstedtii_DSM44385","Ckutscheri_DSM20755","Clactis_RW25","Cpseudotuberculosis_31","Cpseudotuberculosis_ATCC19410","CriegeliiPUDD83A45","Crouxii_FRC0190","Csilva…	0.330769	0.254241	1.68238	0.330749	0.254231	1.68238	3074	2	1. 0.69799;2. 90;3. 268;4. 123;5. 123;6. 367;7. 187;8. 559;9. 148;10. L;11. TTG	1. 0.67806;2. 389;3. 1165;4. 455;5. 455;6. 1363;7. 530;8. 1588;9. 802;10. A;11. GCT
ERS451417_00752	1717.62.peg.757	NA	NA	NA	1	9	Cdeserti_GIMN1010,"Cdiphtheriae_NCTC11397","Ckutscheri_DSM20755","Cpseudotuberculosis_ATCC19410","Crouxii_FRC0190","Csilvaticum_KL0182","Culcerans_NCTC12077","Culcerans_NCTC7910","Cvitaeruminis_DSM20294"	0.11273	0.11273	2.2863	0.11273	0.11273	2.2863	2	1	1. 0.52796;2. 286;3. 856;4. 376;5. 290;6. 868;7. 292;8. 874;9. 706;10. S;11. TCT
ERS451417_00769	1717.62.peg.774	NA	NA	NA	1	30	Catypicum_R2070,"Caurimucosum_ATCC700975","Cbelfantii_FRC0043","Ccamporealensis_DSM44610","Cdeserti_GIMN1010","Cdiphtheriae_NCTC11397","Cdoosanense_DSM45436","Cefficiens_YS314","Cepidermidicanis_DSM45586","Cglutamicum_ATCC13032","Chalotolerans_YIM70093","Chumireducens_DSM45392","Cimitans_DSM44264","Ckutscheri_DSM20755","Cmarinum_DSM44953","Cmaris_DSM45190","Cmustelae_DSM45274","Cpseudotuberculosi…	0.328491	0.321813	1.59515	0.328491	0.321813	1.59515	3074	1	1. 0.54745;2. 104;3. 310;4. 121;5. 113;6. 337;7. 149;8. 445;9. 166;10. S;11. AGC
ERS451417_00880	1717.62.peg.886	NA	NA	NA	1	8	Cbelfantii_FRC0043,"Cdiphtheriae_NCTC11397","Cpseudotuberculosis_31","Cpseudotuberculosis_ATCC19410","Crouxii_FRC0190","Csilvaticum_KL0182","Culcerans_NCTC12077","Culcerans_NCTC7910"	0.112112	0.112112	2.30803	0.112112	0.112112	2.30803	2	4	1. 0.43812;2. 19;3. 55;4. 22;5. 21;6. 61;7. 19;8. 55;9. 55;10. Q;11. CAG	1. 0.44596;2. 93;3. 277;4. 97;5. 96;6. 286;7. 96;8. 286;9. 259;10. K;11. AAG	1. 0.47033;2. 108;3. 322;4. 113;5. 111;6. 331;7. 111;8. 331;9. 304;10. R;11. CGC	1. 0.45208;2. 366;3. 1096;4. 389;5. 369;6. 1105;7. 369;8. 1105;9. 1075;10. P;11. CCT
ERS451417_01988	1717.62.peg.1989	NA	NA	NA	1	14	Caurimucosum_ATCC700975,"Cbelfantii_FRC0043","Ccamporealensis_DSM44610","Cdiphtheriae_NCTC11397","Cimitans_DSM44264","Cmustelae_DSM45274","CriegeliiPUDD83A45","Csilvaticum_KL0182","Csimulans_PES1","Csingulare_IBSB52218","Culcerans_NCTC12077","Culcerans_NCTC7910","Cureicelerivorans_IMMIBRIV2301","Cvitaeruminis_DSM20294"	0.30656	0.30656	1.88688	0.30656	0.30656	1.88688	258	0
ERS451417_01808	1717.62.peg.1814	NA	NA	NA	1	38	Cargentoratense_DSM44202,"Catypicum_R2070","Caurimucosum_ATCC700975","Cbelfantii_FRC0043","Ccallunae_DSM20147","Ccamporealensis_DSM44610","Cdeserti_GIMN1010","Cdiphtheriae_NCTC11397","Cdoosanense_DSM45436","Cefficiens_YS314","Cepidermidicanis_DSM45586","Cfalsenii_DSM44353","Cglutamicum_ATCC13032","Cglycinophilum_AJ3170","Chalotolerans_YIM70093","Chumireducens_DSM45392","Cimitans_DSM44264","Cjeike…	0.0414766	0.0414766	1.52518	0.0414766	0.0414766	1.52518	3330	0
ERS451417_01249	1717.62.peg.1257	NA	NA	NA	1	39	Cargentoratense_DSM44202,"Catypicum_R2070","Caurimucosum_ATCC700975","Cbelfantii_FRC0043","Ccallunae_DSM20147","Ccamporealensis_DSM44610","Cdeserti_GIMN1010","Cdiphtheriae_NCTC11397","Cdoosanense_DSM45436","Cefficiens_YS314","Cepidermidicanis_DSM45586","Cfalsenii_DSM44353","Cglutamicum_ATCC13032","Cglycinophilum_AJ3170","Chalotolerans_YIM70093","Chumireducens_DSM45392","Cimitans_DSM44264","Cjeike…	0.13802	0.13802	1.78102	0.13802	0.13802	1.781	258	0
ERS451417_01866	1717.62.peg.1868	NA	NA	NA	1	31	Cargentoratense_DSM44202,"Caurimucosum_ATCC700975","Cbelfantii_FRC0043","Ccallunae_DSM20147","Ccamporealensis_DSM44610","Cdeserti_GIMN1010","Cdiphtheriae_NCTC11397","Cdoosanense_DSM45436","Cefficiens_YS314","Cepidermidicanis_DSM45586","Cfalsenii_DSM44353","Cglutamicum_ATCC13032","Cglycinophilum_AJ3170","Chalotolerans_YIM70093","Chumireducens_DSM45392","Cjeikeium_K41","Ckroppenstedtii_DSM44385","C…	0.177294	0.177294	1.47205	0.177294	0.177294	1.47205	258	0
ERS451417_02313	1717.62.peg.2340	NA	NA	NA	1	38	Cargentoratense_DSM44202,"Catypicum_R2070","Caurimucosum_ATCC700975","Cbelfantii_FRC0043","Ccallunae_DSM20147","Ccamporealensis_DSM44610","Cdeserti_GIMN1010","Cdiphtheriae_NCTC11397","Cdoosanense_DSM45436","Cefficiens_YS314","Cepidermidicanis_DSM45586","Cfalsenii_DSM44353","Cglutamicum_ATCC13032","Cglycinophilum_AJ3170","Chalotolerans_YIM70093","Chumireducens_DSM45392","Cimitans_DSM44264","Cjeike…	0.671135	0.263034	1.64845	0.389058	0.263034	1.64845	258	0
ERS451417_00295	1717.62.peg.296	NA	NA	NA	1	39	Cargentoratense_DSM44202,"Catypicum_R2070","Caurimucosum_ATCC700975","Cbelfantii_FRC0043","Ccallunae_DSM20147","Ccamporealensis_DSM44610","Cdeserti_GIMN1010","Cdiphtheriae_NCTC11397","Cdoosanense_DSM45436","Cefficiens_YS314","Cepidermidicanis_DSM45586","Cfalsenii_DSM44353","Cglutamicum_ATCC13032","Cglycinophilum_AJ3170","Chalotolerans_YIM70093","Chumireducens_DSM45392","Cimitans_DSM44264","Cjeike…	0.152657	0.152657	1.69241	0.152657	0.152657	1.6924	258	0
ERS451417_02203	1717.62.peg.2229	NA	NA	NA	1	21	Catypicum_R2070,"Caurimucosum_ATCC700975","Cbelfantii_FRC0043","Ccallunae_DSM20147","Ccamporealensis_DSM44610","Cdeserti_GIMN1010","Cdiphtheriae_NCTC11397","Cdoosanense_DSM45436","Cepidermidicanis_DSM45586","Cglutamicum_ATCC13032","Chalotolerans_YIM70093","Ckutscheri_DSM20755","Cmaris_DSM45190","Cpseudotuberculosis_31","Cpseudotuberculosis_ATCC19410","Csilvaticum_KL0182","Csimulans_PES1","Csingul…	0.111494	0.111494	2.00442	0.111494	0.111494	2.00442	258	0
ERS451417_00600	1717.62.peg.604	NA	NA	NA	1	39	Cargentoratense_DSM44202,"Catypicum_R2070","Caurimucosum_ATCC700975","Cbelfantii_FRC0043","Ccallunae_DSM20147","Ccamporealensis_DSM44610","Cdeserti_GIMN1010","Cdiphtheriae_NCTC11397","Cdoosanense_DSM45436","Cefficiens_YS314","Cepidermidicanis_DSM45586","Cfalsenii_DSM44353","Cglutamicum_ATCC13032","Cglycinophilum_AJ3170","Chalotolerans_YIM70093","Chumireducens_DSM45392","Cimitans_DSM44264","Cjeike…	0.103186	0.103186	1.965	0.103195	0.103195	1.965	3330	0
ERS451417_00549	1717.62.peg.553	NA	NA	NA	1	12	Cargentoratense_DSM44202,"Cbelfantii_FRC0043","Cdiphtheriae_NCTC11397","Clactis_RW25","Cmustelae_DSM45274","Cpseudotuberculosis_ATCC19410","Crouxii_FRC0190","Csilvaticum_KL0182","Csimulans_PES1","Culcerans_NCTC12077","Culcerans_NCTC7910","Curealyticum_DSM7109"	0.186329	0.186329	2.24183	0.186329	0.186329	2.24183	2	1	1. 0.64463;2. 78;3. 232;4. 93;5. 93;6. 277;7. 95;8. 283;9. 211;10. R;11. CGA
ERS451417_00881	1717.62.peg.887	NA	NA	NA	1	17	Caurimucosum_ATCC700975,"Cbelfantii_FRC0043","Ccamporealensis_DSM44610","Cdiphtheriae_NCTC11397","Cepidermidicanis_DSM45586","Cjeikeium_K41","Ckutscheri_DSM20755","Clactis_RW25","Cpseudotuberculosis_31","Cpseudotuberculosis_ATCC19410","Crouxii_FRC0190","Csilvaticum_KL0182","Csimulans_PES1","Csingulare_IBSB52218","Culcerans_NCTC12077","Culcerans_NCTC7910","Cuterequi_DSM45634"	0.146211	0.146211	2.66258	0.146211	0.146211	2.66258	2	3	1. 0.52365;2. 126;3. 376;4. 146;5. 146;6. 436;7. 157;8. 469;9. 319;10. I;11. ATA	1. 0.5784;2. 418;3. 1252;4. 439;5. 439;6. 1315;7. 451;8. 1351;9. 1180;10. A;11. GCC	1. 0.47264;2. 440;3. 1318;4. 461;5. 461;6. 1381;7. 473;8. 1417;9. 1246;10. I;11. ATC
ERS451417_00807	1717.62.peg.814	NA	NA	NA	1	23	Catypicum_R2070,"Caurimucosum_ATCC700975","Cbelfantii_FRC0043","Ccallunae_DSM20147","Ccamporealensis_DSM44610","Cdeserti_GIMN1010","Cdiphtheriae_NCTC11397","Cdoosanense_DSM45436","Cefficiens_YS314","Cepidermidicanis_DSM45586","Cglutamicum_ATCC13032","Chalotolerans_YIM70093","Chumireducens_DSM45392","Cmarinum_DSM44953","Cmaris_DSM45190","Cpseudotuberculosis_ATCC19410","Crouxii_FRC0190","Csilvaticu…	0.371316	0.371316	1.9245	0.371309	0.371309	1.9245	2050	1	1. 0.84312;2. 171;3. 511;4. 199;5. 198;6. 592;7. 205;8. 613;9. 400;10. A;11. GCT
ERS451417_00098	1717.62.peg.96	NA	NA	NA	1	10	Cbelfantii_FRC0043,"Cdiphtheriae_NCTC11397","Cmustelae_DSM45274","Cpseudotuberculosis_31","Cpseudotuberculosis_ATCC19410","Crouxii_FRC0190","Csilvaticum_KL0182","Culcerans_NCTC12077","Culcerans_NCTC7910","Cvitaeruminis_DSM20294"	0.135917	0.135917	3.08098	0.135917	0.135917	3.08097	2	1	1. 0.56758;2. 118;3. 352;4. 147;5. 121;6. 361;7. 121;8. 361;9. 289;10. M;11. ATG
ERS451417_01302	1717.62.peg.1310	NA	NA	NA	1	38	Cargentoratense_DSM44202,"Catypicum_R2070","Caurimucosum_ATCC700975","Cbelfantii_FRC0043","Ccallunae_DSM20147","Ccamporealensis_DSM44610","Cdeserti_GIMN1010","Cdiphtheriae_NCTC11397","Cdoosanense_DSM45436","Cefficiens_YS314","Cepidermidicanis_DSM45586","Cfalsenii_DSM44353","Cglutamicum_ATCC13032","Cglycinophilum_AJ3170","Chalotolerans_YIM70093","Chumireducens_DSM45392","Cimitans_DSM44264","Cjeike…	0.173832	0.173832	1.59839	0.173832	0.173832	1.59839	2	2	1. 0.42506;2. 225;3. 673;4. 241;5. 241;6. 721;7. 266;8. 796;9. 631;10. D;11. GAT	1. 0.49042;2. 632;3. 1894;4. 652;5. 652;6. 1954;7. 680;8. 2038;9. 1747;10. I;11. ATA
ERS451417_01483	1717.62.peg.1492	NA	NA	NA	1	22	Caurimucosum_ATCC700975,"Cbelfantii_FRC0043","Ccallunae_DSM20147","Cdeserti_GIMN1010","Cdiphtheriae_NCTC11397","Cdoosanense_DSM45436","Cefficiens_YS314","Cepidermidicanis_DSM45586","Cglutamicum_ATCC13032","Chumireducens_DSM45392","Ckutscheri_DSM20755","Cmarinum_DSM44953","Cmustelae_DSM45274","Cpseudotuberculosis_ATCC19410","Csilvaticum_KL0182","Csimulans_PES1","Csingulare_IBSB52218","Ctestudinori…	0.388474	0.388474	2.07297	0.388474	0.388474	2.07297	258	0
ERS451417_01472	1717.62.peg.1482	NA	NA	NA	1	31	Catypicum_R2070,"Caurimucosum_ATCC700975","Cbelfantii_FRC0043","Ccallunae_DSM20147","Ccamporealensis_DSM44610","Cdeserti_GIMN1010","Cdiphtheriae_NCTC11397","Cdoosanense_DSM45436","Cefficiens_YS314","Cepidermidicanis_DSM45586","Cglutamicum_ATCC13032","Chalotolerans_YIM70093","Chumireducens_DSM45392","Cimitans_DSM44264","Ckutscheri_DSM20755","Clactis_RW25","Cmarinum_DSM44953","Cmaris_DSM45190","Cmu…	0.299102	0.299102	1.60153	0.299102	0.299102	1.60153	3074	1	1. 0.47701;2. 139;3. 415;4. 177;5. 149;6. 445;7. 183;8. 547;9. 289;10. G;11. GGA
ERS451417_01259	1717.62.peg.1267	NA	NA	NA	1	18	Cargentoratense_DSM44202,"Cbelfantii_FRC0043","Ccallunae_DSM20147","Cdiphtheriae_NCTC11397","Cefficiens_YS314","Cepidermidicanis_DSM45586","Cglutamicum_ATCC13032","Ckroppenstedtii_DSM44385","Ckutscheri_DSM20755","Clactis_RW25","Cmustelae_DSM45274","Cpseudotuberculosis_31","Cpseudotuberculosis_ATCC19410","Crouxii_FRC0190","Csilvaticum_KL0182","Culcerans_NCTC12077","Culcerans_NCTC7910","Cvitaerumin…	0.145887	0.145887	1.99145	0.145887	0.145887	1.99145	2	2	1. 0.45306;2. 583;3. 1747;4. 625;5. 601;6. 1801;7. 649;8. 1945;9. 1591;10. A;11. GCA	1. 0.43008;2. 770;3. 2308;4. 826;5. 802;6. 2404;7. 861;8. 2581;9. 2110;10. V;11. GTC
ERS451417_01511	1717.62.peg.1519	NA	NA	NA	1	19	Caurimucosum_ATCC700975,"Cbelfantii_FRC0043","Ccallunae_DSM20147","Cdiphtheriae_NCTC11397","Cepidermidicanis_DSM45586","Cfalsenii_DSM44353","Cglutamicum_ATCC13032","Cglycinophilum_AJ3170","Chumireducens_DSM45392","Cjeikeium_K41","Ckroppenstedtii_DSM44385","Clactis_RW25","Cpseudotuberculosis_31","Cpseudotuberculosis_ATCC19410","Csilvaticum_KL0182","Csimulans_PES1","Culcerans_NCTC12077","Culcerans_…	0.208038	0.208038	1.87274	0.208038	0.208038	1.87274	1282	0
ERS451417_00968	1717.62.peg.976	NA	NA	NA	1	16	Cbelfantii_FRC0043,"Ccallunae_DSM20147","Cdeserti_GIMN1010","Cdiphtheriae_NCTC11397","Cepidermidicanis_DSM45586","Cglutamicum_ATCC13032","Cglycinophilum_AJ3170","Ckutscheri_DSM20755","Clactis_RW25","Cpseudotuberculosis_31","Cpseudotuberculosis_ATCC19410","Crouxii_FRC0190","Csilvaticum_KL0182","Ctestudinoris_DSM44614","Culcerans_NCTC12077","Culcerans_NCTC7910"	0.118525	0.118525	2.28178	0.118535	0.118535	2.28175	3330	0
ERS451417_02210	1717.62.peg.2234	NA	NA	NA	1	38	Cargentoratense_DSM44202,"Catypicum_R2070","Caurimucosum_ATCC700975","Cbelfantii_FRC0043","Ccallunae_DSM20147","Ccamporealensis_DSM44610","Cdeserti_GIMN1010","Cdiphtheriae_NCTC11397","Cdoosanense_DSM45436","Cefficiens_YS314","Cepidermidicanis_DSM45586","Cfalsenii_DSM44353","Cglutamicum_ATCC13032","Cglycinophilum_AJ3170","Chalotolerans_YIM70093","Chumireducens_DSM45392","Cimitans_DSM44264","Cjeike…	0.185233	0.185233	1.73155	0.185233	0.185233	1.73155	258	0
ERS451417_00659	1717.62.peg.663	NA	NA	NA	1	28	Catypicum_R2070,"Caurimucosum_ATCC700975","Cbelfantii_FRC0043","Ccallunae_DSM20147","Ccamporealensis_DSM44610","Cdeserti_GIMN1010","Cdiphtheriae_NCTC11397","Cdoosanense_DSM45436","Cepidermidicanis_DSM45586","Cglutamicum_ATCC13032","Chalotolerans_YIM70093","Chumireducens_DSM45392","Cimitans_DSM44264","Cmarinum_DSM44953","Cmaris_DSM45190","Cmustelae_DSM45274","Cpseudotuberculosis_31","Cpseudotuberc…	0.269452	0.269452	1.59204	0.269452	0.269452	1.59204	3330	0
ERS451417_00468	1717.62.peg.472	NA	NA	NA	1	12	Cbelfantii_FRC0043,"Cdiphtheriae_NCTC11397","Ckutscheri_DSM20755","Cmustelae_DSM45274","Cpseudotuberculosis_31","Cpseudotuberculosis_ATCC19410","Crouxii_FRC0190","Csilvaticum_KL0182","Culcerans_NCTC12077","Culcerans_NCTC7910","Cuterequi_DSM45634","Cvitaeruminis_DSM20294"	0.162765	0.162765	3.17346	0.162765	0.162765	3.17346	258	0
ERS451417_00480	1717.62.peg.483	NA	NA	NA	1	39	Cargentoratense_DSM44202,"Catypicum_R2070","Caurimucosum_ATCC700975","Cbelfantii_FRC0043","Ccallunae_DSM20147","Ccamporealensis_DSM44610","Cdeserti_GIMN1010","Cdiphtheriae_NCTC11397","Cdoosanense_DSM45436","Cefficiens_YS314","Cepidermidicanis_DSM45586","Cfalsenii_DSM44353","Cglutamicum_ATCC13032","Cglycinophilum_AJ3170","Chalotolerans_YIM70093","Chumireducens_DSM45392","Cimitans_DSM44264","Cjeike…	0.157516	0.157516	2.21941	0.157516	0.157516	2.21941	258	0
ERS451417_01213	1717.62.peg.1221	NA	NA	NA	1	10	Cbelfantii_FRC0043,"Cdiphtheriae_NCTC11397","Ckutscheri_DSM20755","Cpseudotuberculosis_31","Cpseudotuberculosis_ATCC19410","Crouxii_FRC0190","Csilvaticum_KL0182","Culcerans_NCTC12077","Culcerans_NCTC7910","Cvitaeruminis_DSM20294"	0.131204	0.131204	2.84722	0.131204	0.131204	2.84722	258	0
ERS451417_02123	1717.62.peg.2138	NA	NA	NA	1	38	Cargentoratense_DSM44202,"Catypicum_R2070","Caurimucosum_ATCC700975","Cbelfantii_FRC0043","Ccallunae_DSM20147","Ccamporealensis_DSM44610","Cdeserti_GIMN1010","Cdiphtheriae_NCTC11397","Cdoosanense_DSM45436","Cefficiens_YS314","Cepidermidicanis_DSM45586","Cfalsenii_DSM44353","Cglutamicum_ATCC13032","Cglycinophilum_AJ3170","Chalotolerans_YIM70093","Chumireducens_DSM45392","Cimitans_DSM44264","Cjeike…	0.0604587	0.0604587	2.12272	0.0604587	0.0604587	2.12272	258	0
ERS451417_02120	1717.62.peg.2135	NA	NA	NA	1	36	Cargentoratense_DSM44202,"Catypicum_R2070","Caurimucosum_ATCC700975","Cbelfantii_FRC0043","Ccallunae_DSM20147","Ccamporealensis_DSM44610","Cdeserti_GIMN1010","Cdiphtheriae_NCTC11397","Cdoosanense_DSM45436","Cefficiens_YS314","Cepidermidicanis_DSM45586","Cfalsenii_DSM44353","Cglutamicum_ATCC13032","Cglycinophilum_AJ3170","Chalotolerans_YIM70093","Chumireducens_DSM45392","Cimitans_DSM44264","Cjeike…	0.127168	0.127168	1.78104	0.127168	0.127168	1.78105	258	0
ERS451417_01955	1717.62.peg.1955	NA	NA	NA	1	38	Cargentoratense_DSM44202,"Catypicum_R2070","Caurimucosum_ATCC700975","Cbelfantii_FRC0043","Ccallunae_DSM20147","Ccamporealensis_DSM44610","Cdeserti_GIMN1010","Cdiphtheriae_NCTC11397","Cdoosanense_DSM45436","Cefficiens_YS314","Cepidermidicanis_DSM45586","Cfalsenii_DSM44353","Cglutamicum_ATCC13032","Cglycinophilum_AJ3170","Chalotolerans_YIM70093","Chumireducens_DSM45392","Cimitans_DSM44264","Cjeike…	0.246878	0.246878	1.79551	0.246878	0.246878	1.79551	2050	3	1. 0.41325;2. 262;3. 784;4. 285;5. 285;6. 853;7. 317;8. 949;9. 622;10. S;11. TCG	1. 0.43641;2. 313;3. 937;4. 336;5. 336;6. 1006;7. 368;8. 1102;9. 775;10. G;11. GGT	1. 0.5532;2. 327;3. 979;4. 350;5. 350;6. 1048;7. 382;8. 1144;9. 817;10. Y;11. TAC
ERS451417_02140	1717.62.peg.2160	NA	NA	NA	1	32	Caurimucosum_ATCC700975,"Cbelfantii_FRC0043","Ccallunae_DSM20147","Cdeserti_GIMN1010","Cdiphtheriae_NCTC11397","Cdoosanense_DSM45436","Cefficiens_YS314","Cepidermidicanis_DSM45586","Cfalsenii_DSM44353","Cglutamicum_ATCC13032","Cglycinophilum_AJ3170","Chalotolerans_YIM70093","Chumireducens_DSM45392","Cimitans_DSM44264","Cjeikeium_K41","Ckutscheri_DSM20755","Clactis_RW25","Cmarinum_DSM44953","Cmari…	0.112259	0.112259	1.66174	0.112259	0.112259	1.66174	2050	2	1. 0.40296;2. 59;3. 175;4. 105;5. 105;6. 313;7. 113;8. 337;9. 118;10. V;11. GTG	1. 0.42654;2. 232;3. 694;4. 283;5. 278;6. 832;7. 286;8. 856;9. 637;10. N;11. AAC
ERS451417_00263	1717.62.peg.257	NA	NA	NA	1	32	Cargentoratense_DSM44202,"Catypicum_R2070","Cbelfantii_FRC0043","Ccallunae_DSM20147","Ccamporealensis_DSM44610","Cdeserti_GIMN1010","Cdiphtheriae_NCTC11397","Cdoosanense_DSM45436","Cefficiens_YS314","Cepidermidicanis_DSM45586","Cfalsenii_DSM44353","Cglutamicum_ATCC13032","Cglycinophilum_AJ3170","Chalotolerans_YIM70093","Chumireducens_DSM45392","Cimitans_DSM44264","Cjeikeium_K41","Cmarinum_DSM4495…	0.233373	0.233373	1.88734	0.233373	0.233373	1.88734	1282	0
ERS451417_02388	1717.62.peg.2420	NA	NA	NA	1	28	Catypicum_R2070,"Cbelfantii_FRC0043","Ccallunae_DSM20147","Ccamporealensis_DSM44610","Cdeserti_GIMN1010","Cdiphtheriae_NCTC11397","Cdoosanense_DSM45436","Cefficiens_YS314","Cglutamicum_ATCC13032","Cglycinophilum_AJ3170","Chalotolerans_YIM70093","Chumireducens_DSM45392","Cimitans_DSM44264","Ckutscheri_DSM20755","Cmarinum_DSM44953","Cmaris_DSM45190","Cpseudotuberculosis_31","Cpseudotuberculosis_ATC…	0.330154	0.330154	1.97601	0.330154	0.330154	1.97601	2	2	1. 0.56834;2. 35;3. 103;4. 52;5. 35;6. 103;7. 51;8. 151;9. 43;10. V;11. GTG	1. 0.51157;2. 71;3. 211;4. 88;5. 71;6. 211;7. 87;8. 259;9. 151;10. L;11. CTG
ERS451417_01773	1717.62.peg.1775	NA	NA	NA	1	23	Cargentoratense_DSM44202,"Cbelfantii_FRC0043","Ccallunae_DSM20147","Ccamporealensis_DSM44610","Cdeserti_GIMN1010","Cdiphtheriae_NCTC11397","Cefficiens_YS314","Cglutamicum_ATCC13032","Chalotolerans_YIM70093","Cimitans_DSM44264","Cjeikeium_K41","Ckutscheri_DSM20755","Clactis_RW25","Cmarinum_DSM44953","Cpseudotuberculosis_ATCC19410","Csilvaticum_KL0182","Csimulans_PES1","Ctestudinoris_DSM44614","Cul…	0.16977	0.16977	1.95134	0.16977	0.16977	1.95134	258	0
ERS451417_00348	1717.62.peg.351	NA	NA	NA	1	39	Cargentoratense_DSM44202,"Catypicum_R2070","Caurimucosum_ATCC700975","Cbelfantii_FRC0043","Ccallunae_DSM20147","Ccamporealensis_DSM44610","Cdeserti_GIMN1010","Cdiphtheriae_NCTC11397","Cdoosanense_DSM45436","Cefficiens_YS314","Cepidermidicanis_DSM45586","Cfalsenii_DSM44353","Cglutamicum_ATCC13032","Cglycinophilum_AJ3170","Chalotolerans_YIM70093","Chumireducens_DSM45392","Cimitans_DSM44264","Cjeike…	0.100548	0.100548	1.80108	0.100548	0.100548	1.80108	258	0
ERS451417_00588	1717.62.peg.592	NA	NA	NA	1	31	Cargentoratense_DSM44202,"Catypicum_R2070","Caurimucosum_ATCC700975","Cbelfantii_FRC0043","Ccallunae_DSM20147","Ccamporealensis_DSM44610","Cdeserti_GIMN1010","Cdiphtheriae_NCTC11397","Cdoosanense_DSM45436","Cefficiens_YS314","Cglutamicum_ATCC13032","Chalotolerans_YIM70093","Chumireducens_DSM45392","Cimitans_DSM44264","Ckutscheri_DSM20755","Cmarinum_DSM44953","Cmaris_DSM45190","Cmustelae_DSM45274"…	0.30493	0.30493	1.63682	0.30493	0.30493	1.63682	1282	0
ERS451417_00412	1717.62.peg.412	NA	NA	NA	1	13	Catypicum_R2070,"Cbelfantii_FRC0043","Ccamporealensis_DSM44610","Cdiphtheriae_NCTC11397","Cepidermidicanis_DSM45586","Ckutscheri_DSM20755","Cpseudotuberculosis_31","Cpseudotuberculosis_ATCC19410","Crouxii_FRC0190","Csilvaticum_KL0182","Csimulans_PES1","Culcerans_NCTC12077","Culcerans_NCTC7910"	0.18072	0.18072	2.50644	0.18072	0.18072	2.50644	2306	0
ERS451417_01869	1717.62.peg.1871	NA	NA	NA	1	38	Cargentoratense_DSM44202,"Catypicum_R2070","Caurimucosum_ATCC700975","Cbelfantii_FRC0043","Ccallunae_DSM20147","Ccamporealensis_DSM44610","Cdeserti_GIMN1010","Cdiphtheriae_NCTC11397","Cdoosanense_DSM45436","Cefficiens_YS314","Cepidermidicanis_DSM45586","Cfalsenii_DSM44353","Cglutamicum_ATCC13032","Cglycinophilum_AJ3170","Chalotolerans_YIM70093","Chumireducens_DSM45392","Cimitans_DSM44264","Cjeike…	0.152881	0.152881	1.34424	0.152881	0.152881	1.34424	2306	0
ERS451417_00629	1717.62.peg.633	NA	NA	NA	1	38	Cargentoratense_DSM44202,"Caurimucosum_ATCC700975","Cbelfantii_FRC0043","Ccallunae_DSM20147","Ccamporealensis_DSM44610","Cdeserti_GIMN1010","Cdiphtheriae_NCTC11397","Cdoosanense_DSM45436","Cefficiens_YS314","Cepidermidicanis_DSM45586","Cfalsenii_DSM44353","Cglutamicum_ATCC13032","Cglycinophilum_AJ3170","Chalotolerans_YIM70093","Chumireducens_DSM45392","Cimitans_DSM44264","Cjeikeium_K41","Ckroppen…	0.0979692	0.0979692	1.92261	0.0979692	0.0979692	1.92261	258	0
ERS451417_00672	1717.62.peg.679	NA	NA	NA	1	15	Cargentoratense_DSM44202,"Cbelfantii_FRC0043","Cdiphtheriae_NCTC11397","Cefficiens_YS314","Cepidermidicanis_DSM45586","Ckutscheri_DSM20755","Clactis_RW25","Cmustelae_DSM45274","Cpseudotuberculosis_31","Cpseudotuberculosis_ATCC19410","Crouxii_FRC0190","Csilvaticum_KL0182","Culcerans_NCTC12077","Culcerans_NCTC7910","Cvitaeruminis_DSM20294"	0.21193	0.21193	2.17225	0.21193	0.21193	2.17225	258	0
ERS451417_01586	1717.62.peg.1595	NA	NA	NA	1	37	Cargentoratense_DSM44202,"Catypicum_R2070","Caurimucosum_ATCC700975","Cbelfantii_FRC0043","Ccallunae_DSM20147","Ccamporealensis_DSM44610","Cdeserti_GIMN1010","Cdiphtheriae_NCTC11397","Cdoosanense_DSM45436","Cefficiens_YS314","Cepidermidicanis_DSM45586","Cfalsenii_DSM44353","Cglutamicum_ATCC13032","Cglycinophilum_AJ3170","Chalotolerans_YIM70093","Chumireducens_DSM45392","Cimitans_DSM44264","Cjeike…	0.193958	0.193958	1.68254	0.193958	0.193958	1.68253	258	0
ERS451417_01177	1717.62.peg.1186	NA	NA	NA	1	39	Cargentoratense_DSM44202,"Catypicum_R2070","Caurimucosum_ATCC700975","Cbelfantii_FRC0043","Ccallunae_DSM20147","Ccamporealensis_DSM44610","Cdeserti_GIMN1010","Cdiphtheriae_NCTC11397","Cdoosanense_DSM45436","Cefficiens_YS314","Cepidermidicanis_DSM45586","Cfalsenii_DSM44353","Cglutamicum_ATCC13032","Cglycinophilum_AJ3170","Chalotolerans_YIM70093","Chumireducens_DSM45392","Cimitans_DSM44264","Cjeike…	0.228173	0.228173	1.87054	0.228173	0.228173	1.87053	3074	1	1. 0.66972;2. 247;3. 739;4. 254;5. 254;6. 760;7. 277;8. 829;9. 544;10. K;11. AAA
ERS451417_01167	1717.62.peg.1178	NA	NA	NA	1	39	Cargentoratense_DSM44202,"Catypicum_R2070","Caurimucosum_ATCC700975","Cbelfantii_FRC0043","Ccallunae_DSM20147","Ccamporealensis_DSM44610","Cdeserti_GIMN1010","Cdiphtheriae_NCTC11397","Cdoosanense_DSM45436","Cefficiens_YS314","Cepidermidicanis_DSM45586","Cfalsenii_DSM44353","Cglutamicum_ATCC13032","Cglycinophilum_AJ3170","Chalotolerans_YIM70093","Chumireducens_DSM45392","Cimitans_DSM44264","Cjeike…	0.135246	0.135246	1.8822	0.135246	0.135246	1.8822	258	0
ERS451417_00179	1717.62.peg.175	NA	NA	NA	1	39	Cargentoratense_DSM44202,"Catypicum_R2070","Caurimucosum_ATCC700975","Cbelfantii_FRC0043","Ccallunae_DSM20147","Ccamporealensis_DSM44610","Cdeserti_GIMN1010","Cdiphtheriae_NCTC11397","Cdoosanense_DSM45436","Cefficiens_YS314","Cepidermidicanis_DSM45586","Cfalsenii_DSM44353","Cglutamicum_ATCC13032","Cglycinophilum_AJ3170","Chalotolerans_YIM70093","Chumireducens_DSM45392","Cimitans_DSM44264","Cjeike…	0.230152	0.230152	1.61502	0.230152	0.230152	1.61502	2	2	1. 0.64436;2. 151;3. 451;4. 190;5. 190;6. 568;7. 206;8. 616;9. 376;10. E;11. GAG	1. 0.44977;2. 362;3. 1084;4. 403;5. 403;6. 1207;7. 419;8. 1255;9. 1009;10. E;11. GAG
ERS451417_01725	1717.62.peg.1728	NA	NA	NA	1	6	Cbelfantii_FRC0043,"Cdiphtheriae_NCTC11397","Cpseudotuberculosis_ATCC19410","Csilvaticum_KL0182","Culcerans_NCTC12077","Culcerans_NCTC7910"	0.309116	0.272999	3.35081	0.309116	0.272999	3.35081	2050	1	1. 0.60771;2. 112;3. 334;4. 136;5. 118;6. 352;7. 128;8. 382;9. 262;10. K;11. AAA
ERS451417_01146	1717.62.peg.1157	NA	NA	NA	1	18	Catypicum_R2070,"Cbelfantii_FRC0043","Cdiphtheriae_NCTC11397","Cefficiens_YS314","Cepidermidicanis_DSM45586","Clactis_RW25","Cmarinum_DSM44953","Cmaris_DSM45190","Cpseudotuberculosis_31","Cpseudotuberculosis_ATCC19410","Crouxii_FRC0190","Csilvaticum_KL0182","Csimulans_PES1","Ctestudinoris_DSM44614","Culcerans_NCTC12077","Culcerans_NCTC7910","Cuterequi_DSM45634","Cvitaeruminis_DSM20294"	0.259044	0.259044	1.66286	0.259044	0.259044	1.66286	258	0
ERS451417_01040	1717.62.peg.1050	NA	NA	NA	1	20	Cbelfantii_FRC0043,"Ccallunae_DSM20147","Cdeserti_GIMN1010","Cdiphtheriae_NCTC11397","Cefficiens_YS314","Cglutamicum_ATCC13032","Chalotolerans_YIM70093","Chumireducens_DSM45392","Cjeikeium_K41","Cmarinum_DSM44953","Cmustelae_DSM45274","Cpseudotuberculosis_31","Cpseudotuberculosis_ATCC19410","CriegeliiPUDD83A45","Crouxii_FRC0190","Csilvaticum_KL0182","Culcerans_NCTC12077","Culcerans_NCTC7910","Cur…	0.303307	0.303307	1.7069	0.303307	0.303307	1.7069	258	0
ERS451417_00579	1717.62.peg.582	NA	NA	NA	1	33	Cargentoratense_DSM44202,"Catypicum_R2070","Caurimucosum_ATCC700975","Cbelfantii_FRC0043","Ccallunae_DSM20147","Ccamporealensis_DSM44610","Cdeserti_GIMN1010","Cdiphtheriae_NCTC11397","Cdoosanense_DSM45436","Cefficiens_YS314","Cepidermidicanis_DSM45586","Cglutamicum_ATCC13032","Cglycinophilum_AJ3170","Chalotolerans_YIM70093","Chumireducens_DSM45392","Cimitans_DSM44264","Ckroppenstedtii_DSM44385","…	0.158205	0.158205	2.07867	0.158205	0.158205	2.07866	4098	4	1. 0.4837;2. 112;3. 334;4. 118;5. 118;6. 352;7. 161;8. 481;9. 283;10. E;11. GAA	1. 0.4758;2. 732;3. 2194;4. 754;5. 754;6. 2260;7. 812;8. 2434;9. 2083;10. T;11. ACC	1. 0.42744;2. 1092;3. 3274;4. 1123;5. 1123;6. 3367;7. 1202;8. 3604;9. 3025;10. A;11. GCT	1. 0.5371;2. 1120;3. 3358;4. 1151;5. 1151;6. 3451;7. 1230;8. 3688;9. 3109;10. I;11. ATC
ERS451417_02263	1717.62.peg.2292	NA	NA	NA	1	28	Caurimucosum_ATCC700975,"Cbelfantii_FRC0043","Ccallunae_DSM20147","Ccamporealensis_DSM44610","Cdeserti_GIMN1010","Cdiphtheriae_NCTC11397","Cdoosanense_DSM45436","Cefficiens_YS314","Cepidermidicanis_DSM45586","Cglutamicum_ATCC13032","Chalotolerans_YIM70093","Chumireducens_DSM45392","Cimitans_DSM44264","Ckutscheri_DSM20755","Cmarinum_DSM44953","Cmaris_DSM45190","Cmustelae_DSM45274","Cpseudotubercul…	0.184484	0.184484	1.60815	0.184484	0.184484	1.60815	1282	0
ERS451417_00675	1717.62.peg.682	NA	NA	NA	1	37	Cargentoratense_DSM44202,"Catypicum_R2070","Caurimucosum_ATCC700975","Cbelfantii_FRC0043","Ccallunae_DSM20147","Ccamporealensis_DSM44610","Cdeserti_GIMN1010","Cdiphtheriae_NCTC11397","Cdoosanense_DSM45436","Cefficiens_YS314","Cepidermidicanis_DSM45586","Cfalsenii_DSM44353","Cglutamicum_ATCC13032","Cglycinophilum_AJ3170","Chalotolerans_YIM70093","Chumireducens_DSM45392","Cimitans_DSM44264","Cjeike…	0.185894	0.185894	1.66502	0.185894	0.185894	1.66503	3330	0
ERS451417_01320	1717.62.peg.1328	NA	NA	NA	1	37	Cargentoratense_DSM44202,"Catypicum_R2070","Caurimucosum_ATCC700975","Cbelfantii_FRC0043","Ccallunae_DSM20147","Ccamporealensis_DSM44610","Cdeserti_GIMN1010","Cdiphtheriae_NCTC11397","Cdoosanense_DSM45436","Cefficiens_YS314","Cepidermidicanis_DSM45586","Cfalsenii_DSM44353","Cglutamicum_ATCC13032","Cglycinophilum_AJ3170","Chalotolerans_YIM70093","Chumireducens_DSM45392","Cimitans_DSM44264","Cjeike…	0.262248	0.262248	1.57684	0.262248	0.262248	1.57685	3074	1	1. 0.54933;2. 63;3. 187;4. 72;5. 67;6. 199;7. 82;8. 244;9. 70;10. S;11. TCA
ERS451417_00089	1717.62.peg.86	NA	NA	NA	1	16	Cargentoratense_DSM44202,"Cbelfantii_FRC0043","Ccallunae_DSM20147","Cdeserti_GIMN1010","Cdiphtheriae_NCTC11397","Cfalsenii_DSM44353","Cglutamicum_ATCC13032","Cjeikeium_K41","Ckutscheri_DSM20755","Cmustelae_DSM45274","Cpseudotuberculosis_31","Crouxii_FRC0190","Csilvaticum_KL0182","Culcerans_NCTC12077","Culcerans_NCTC7910","Cvitaeruminis_DSM20294"	0.209752	0.209752	2.14431	0.209752	0.209752	2.1443	2	1	1. 0.50362;2. 92;3. 274;4. 135;5. 99;6. 295;7. 99;8. 295;9. 259;10. L;11. CTC
ERS451417_00754	1717.62.peg.759	NA	NA	NA	1	39	Cargentoratense_DSM44202,"Catypicum_R2070","Caurimucosum_ATCC700975","Cbelfantii_FRC0043","Ccallunae_DSM20147","Ccamporealensis_DSM44610","Cdeserti_GIMN1010","Cdiphtheriae_NCTC11397","Cdoosanense_DSM45436","Cefficiens_YS314","Cepidermidicanis_DSM45586","Cfalsenii_DSM44353","Cglutamicum_ATCC13032","Cglycinophilum_AJ3170","Chalotolerans_YIM70093","Chumireducens_DSM45392","Cimitans_DSM44264","Cjeike…	0.131443	0.131443	2.08624	0.131443	0.131443	2.08621	258	0
ERS451417_01660	1717.62.peg.1667	NA	NA	NA	1	38	Cargentoratense_DSM44202,"Catypicum_R2070","Caurimucosum_ATCC700975","Cbelfantii_FRC0043","Ccallunae_DSM20147","Ccamporealensis_DSM44610","Cdeserti_GIMN1010","Cdiphtheriae_NCTC11397","Cdoosanense_DSM45436","Cefficiens_YS314","Cepidermidicanis_DSM45586","Cfalsenii_DSM44353","Cglutamicum_ATCC13032","Cglycinophilum_AJ3170","Chalotolerans_YIM70093","Chumireducens_DSM45392","Cimitans_DSM44264","Cjeike…	0.207325	0.207325	1.61256	0.207325	0.207325	1.61256	258	0
ERS451417_00558	1717.62.peg.562	NA	NA	NA	1	22	Cargentoratense_DSM44202,"Caurimucosum_ATCC700975","Cbelfantii_FRC0043","Cdeserti_GIMN1010","Cdiphtheriae_NCTC11397","Cglutamicum_ATCC13032","Cglycinophilum_AJ3170","Cimitans_DSM44264","Cjeikeium_K41","Ckutscheri_DSM20755","Cmustelae_DSM45274","Cpseudotuberculosis_31","Cpseudotuberculosis_ATCC19410","CriegeliiPUDD83A45","Crouxii_FRC0190","Csilvaticum_KL0182","Csimulans_PES1","Csingulare_IBSB52218…	0.0796612	0.0796612	1.7328	0.0796612	0.0796612	1.7328	3330	0
ERS451417_01235	1717.62.peg.1243	NA	NA	NA	1	15	Cargentoratense_DSM44202,"Cbelfantii_FRC0043","Cdiphtheriae_NCTC11397","Cepidermidicanis_DSM45586","Ckroppenstedtii_DSM44385","Ckutscheri_DSM20755","Clactis_RW25","Cmustelae_DSM45274","Cpseudotuberculosis_31","Cpseudotuberculosis_ATCC19410","Crouxii_FRC0190","Csilvaticum_KL0182","Culcerans_NCTC12077","Culcerans_NCTC7910","Cvitaeruminis_DSM20294"	0.145788	0.145788	2.60643	0.145788	0.145788	2.60643	2306	0
ERS451417_00504	1717.62.peg.508	NA	NA	NA	1	22	Caurimucosum_ATCC700975,"Cbelfantii_FRC0043","Ccallunae_DSM20147","Cdeserti_GIMN1010","Cdiphtheriae_NCTC11397","Cefficiens_YS314","Cglutamicum_ATCC13032","Chumireducens_DSM45392","Cjeikeium_K41","Ckutscheri_DSM20755","Cmarinum_DSM44953","Cmaris_DSM45190","Cpseudotuberculosis_31","Cpseudotuberculosis_ATCC19410","Crouxii_FRC0190","Csilvaticum_KL0182","Csingulare_IBSB52218","Ctestudinoris_DSM44614",…	0.121931	0.121931	1.95684	0.121931	0.121931	1.95684	2	1	1. 0.6343;2. 321;3. 961;4. 360;5. 360;6. 1078;7. 368;8. 1102;9. 748;10. D;11. GAC
ERS451417_00450	1717.62.peg.453	NA	NA	NA	1	15	Cbelfantii_FRC0043,"Ccallunae_DSM20147","Cdeserti_GIMN1010","Cdiphtheriae_NCTC11397","Cepidermidicanis_DSM45586","Cglutamicum_ATCC13032","Ckutscheri_DSM20755","Cmustelae_DSM45274","Cpseudotuberculosis_31","Cpseudotuberculosis_ATCC19410","Crouxii_FRC0190","Csilvaticum_KL0182","Ctestudinoris_DSM44614","Culcerans_NCTC12077","Culcerans_NCTC7910"	0.122297	0.122297	1.87591	0.122297	0.122297	1.87591	2	2	1. 0.40216;2. 359;3. 1075;4. 365;5. 364;6. 1090;7. 386;8. 1156;9. 910;10. H;11. CAC	1. 0.44333;2. 450;3. 1348;4. 459;5. 455;6. 1363;7. 478;8. 1432;9. 1177;10. S;11. TCC
ERS451417_01899	1717.62.peg.1896	NA	NA	NA	1	7	Cbelfantii_FRC0043,"Cdiphtheriae_NCTC11397","Cpseudotuberculosis_31","Cpseudotuberculosis_ATCC19410","Csilvaticum_KL0182","Culcerans_NCTC12077","Culcerans_NCTC7910"	0.0811558	0.0811558	3.4185	0.0811463	0.0811463	3.41847	258	0
ERS451417_01500	1717.62.peg.1508	NA	NA	NA	1	12	Cdiphtheriae_NCTC11397,"Cefficiens_YS314","Cglutamicum_ATCC13032","Chalotolerans_YIM70093","Chumireducens_DSM45392","Cpseudotuberculosis_31","Cpseudotuberculosis_ATCC19410","Csilvaticum_KL0182","Ctestudinoris_DSM44614","Culcerans_NCTC12077","Culcerans_NCTC7910","Cvitaeruminis_DSM20294"	0.309471	0.309471	1.79976	0.309471	0.309471	1.79976	2	2	1. 0.43505;2. 47;3. 139;4. 74;5. 59;6. 175;7. 80;8. 238;9. 82;10. A;11. GCG	1. 0.5258;2. 246;3. 736;4. 277;5. 261;6. 781;7. 280;8. 838;9. 625;10. A;11. GCT
ERS451417_00568	1717.62.peg.571	NA	NA	NA	1	38	Cargentoratense_DSM44202,"Catypicum_R2070","Caurimucosum_ATCC700975","Cbelfantii_FRC0043","Ccallunae_DSM20147","Ccamporealensis_DSM44610","Cdeserti_GIMN1010","Cdiphtheriae_NCTC11397","Cdoosanense_DSM45436","Cefficiens_YS314","Cepidermidicanis_DSM45586","Cfalsenii_DSM44353","Cglutamicum_ATCC13032","Cglycinophilum_AJ3170","Chalotolerans_YIM70093","Chumireducens_DSM45392","Cimitans_DSM44264","Cjeike…	0.233069	0.233069	1.59774	0.23306	0.23306	1.59774	3330	0
ERS451417_01203	1717.62.peg.1211	NA	NA	NA	1	39	Cargentoratense_DSM44202,"Catypicum_R2070","Caurimucosum_ATCC700975","Cbelfantii_FRC0043","Ccallunae_DSM20147","Ccamporealensis_DSM44610","Cdeserti_GIMN1010","Cdiphtheriae_NCTC11397","Cdoosanense_DSM45436","Cefficiens_YS314","Cepidermidicanis_DSM45586","Cfalsenii_DSM44353","Cglutamicum_ATCC13032","Cglycinophilum_AJ3170","Chalotolerans_YIM70093","Chumireducens_DSM45392","Cimitans_DSM44264","Cjeike…	0.156222	0.156222	1.98981	0.156222	0.156222	1.98981	2306	0
ERS451417_00254	1717.62.peg.249	NA	NA	NA	1	8	Cargentoratense_DSM44202,"Cbelfantii_FRC0043","Cdiphtheriae_NCTC11397","Cmustelae_DSM45274","Cpseudotuberculosis_ATCC19410","Crouxii_FRC0190","Culcerans_NCTC12077","Culcerans_NCTC7910"	0.114997	0.114997	2.7537	0.114997	0.114997	2.7537	4098	3	1. 0.53307;2. 61;3. 181;4. 75;5. 75;6. 223;7. 79;8. 235;9. 109;10. E;11. GAG	1. 0.43055;2. 171;3. 511;4. 185;5. 185;6. 553;7. 189;8. 565;9. 421;10. H;11. CAC	1. 0.45424;2. 331;3. 991;4. 347;5. 347;6. 1039;7. 354;8. 1060;9. 838;10. V;11. GTG
ERS451417_01867	1717.62.peg.1869	NA	NA	NA	1	38	Cargentoratense_DSM44202,"Catypicum_R2070","Caurimucosum_ATCC700975","Cbelfantii_FRC0043","Ccallunae_DSM20147","Ccamporealensis_DSM44610","Cdeserti_GIMN1010","Cdiphtheriae_NCTC11397","Cdoosanense_DSM45436","Cefficiens_YS314","Cepidermidicanis_DSM45586","Cfalsenii_DSM44353","Cglutamicum_ATCC13032","Cglycinophilum_AJ3170","Chalotolerans_YIM70093","Chumireducens_DSM45392","Cimitans_DSM44264","Cjeike…	0.145548	0.145548	1.67188	0.145548	0.145548	1.67188	2	1	1. 0.43118;2. 84;3. 250;4. 104;5. 104;6. 310;7. 154;8. 460;9. 193;10. K;11. AAG
ERS451417_01216	1717.62.peg.1224	NA	NA	NA	1	39	Cargentoratense_DSM44202,"Catypicum_R2070","Caurimucosum_ATCC700975","Cbelfantii_FRC0043","Ccallunae_DSM20147","Ccamporealensis_DSM44610","Cdeserti_GIMN1010","Cdiphtheriae_NCTC11397","Cdoosanense_DSM45436","Cefficiens_YS314","Cepidermidicanis_DSM45586","Cfalsenii_DSM44353","Cglutamicum_ATCC13032","Cglycinophilum_AJ3170","Chalotolerans_YIM70093","Chumireducens_DSM45392","Cimitans_DSM44264","Cjeike…	0.214116	0.214116	1.79625	0.214116	0.214116	1.79625	1282	0
ERS451417_01790	1717.62.peg.1795	NA	NA	NA	1	37	Cargentoratense_DSM44202,"Catypicum_R2070","Caurimucosum_ATCC700975","Cbelfantii_FRC0043","Ccallunae_DSM20147","Ccamporealensis_DSM44610","Cdeserti_GIMN1010","Cdiphtheriae_NCTC11397","Cdoosanense_DSM45436","Cefficiens_YS314","Cepidermidicanis_DSM45586","Cfalsenii_DSM44353","Cglutamicum_ATCC13032","Cglycinophilum_AJ3170","Chalotolerans_YIM70093","Chumireducens_DSM45392","Cimitans_DSM44264","Cjeike…	0.187156	0.167626	1.61964	0.187156	0.167626	1.61964	3074	1	1. 0.71396;2. 91;3. 271;4. 92;5. 92;6. 274;7. 92;8. 274;9. 268;10. I;11. ATC
ERS451417_01231	1717.62.peg.1239	NA	NA	NA	1	13	Cargentoratense_DSM44202,"Cbelfantii_FRC0043","Cdiphtheriae_NCTC11397","Cepidermidicanis_DSM45586","Ckutscheri_DSM20755","Cmustelae_DSM45274","Cpseudotuberculosis_31","Cpseudotuberculosis_ATCC19410","Crouxii_FRC0190","Csilvaticum_KL0182","Culcerans_NCTC12077","Culcerans_NCTC7910","Cvitaeruminis_DSM20294"	0.184093	0.183996	2.33672	0.187419	0.183761	2.33656	3074	2	1. 0.47779;2. 97;3. 289;4. 159;5. 146;6. 436;7. 176;8. 526;9. 229;10. A;11. GCA	1. 0.47291;2. 315;3. 943;4. 416;5. 388;6. 1162;7. 439;8. 1315;9. 676;10. I;11. ATC
ERS451417_02305	1717.62.peg.2332	NA	NA	NA	1	34	Catypicum_R2070,"Caurimucosum_ATCC700975","Cbelfantii_FRC0043","Ccallunae_DSM20147","Ccamporealensis_DSM44610","Cdeserti_GIMN1010","Cdiphtheriae_NCTC11397","Cdoosanense_DSM45436","Cefficiens_YS314","Cepidermidicanis_DSM45586","Cfalsenii_DSM44353","Cglutamicum_ATCC13032","Cglycinophilum_AJ3170","Chalotolerans_YIM70093","Chumireducens_DSM45392","Cimitans_DSM44264","Cjeikeium_K41","Ckutscheri_DSM207…	0.279431	0.279431	1.9863	0.279431	0.279431	1.9863	2306	0
ERS451417_01367	1717.62.peg.1376	NA	NA	NA	1	38	Cargentoratense_DSM44202,"Catypicum_R2070","Caurimucosum_ATCC700975","Cbelfantii_FRC0043","Ccallunae_DSM20147","Ccamporealensis_DSM44610","Cdeserti_GIMN1010","Cdiphtheriae_NCTC11397","Cdoosanense_DSM45436","Cefficiens_YS314","Cepidermidicanis_DSM45586","Cfalsenii_DSM44353","Cglutamicum_ATCC13032","Cglycinophilum_AJ3170","Chalotolerans_YIM70093","Chumireducens_DSM45392","Cimitans_DSM44264","Cjeike…	0.0878619	0.0878619	1.65245	0.0878619	0.0878619	1.65246	258	0
ERS451417_01799	1717.62.peg.1804	NA	NA	NA	1	38	Cargentoratense_DSM44202,"Catypicum_R2070","Caurimucosum_ATCC700975","Cbelfantii_FRC0043","Ccallunae_DSM20147","Ccamporealensis_DSM44610","Cdeserti_GIMN1010","Cdiphtheriae_NCTC11397","Cdoosanense_DSM45436","Cefficiens_YS314","Cepidermidicanis_DSM45586","Cfalsenii_DSM44353","Cglutamicum_ATCC13032","Cglycinophilum_AJ3170","Chalotolerans_YIM70093","Chumireducens_DSM45392","Cimitans_DSM44264","Cjeike…	0.156473	0.156473	2.08717	0.156473	0.156473	2.08717	258	0
ERS451417_01718	1717.62.peg.1721	NA	NA	NA	1	38	Cargentoratense_DSM44202,"Catypicum_R2070","Caurimucosum_ATCC700975","Cbelfantii_FRC0043","Ccallunae_DSM20147","Ccamporealensis_DSM44610","Cdeserti_GIMN1010","Cdiphtheriae_NCTC11397","Cdoosanense_DSM45436","Cefficiens_YS314","Cepidermidicanis_DSM45586","Cfalsenii_DSM44353","Cglutamicum_ATCC13032","Cglycinophilum_AJ3170","Chalotolerans_YIM70093","Chumireducens_DSM45392","Cimitans_DSM44264","Cjeike…	0.210831	0.210831	1.53516	0.210831	0.210831	1.53517	258	0
ERS451417_00006	1717.62.peg.7	NA	NA	NA	1	16	Cbelfantii_FRC0043,"Ccamporealensis_DSM44610","Cdiphtheriae_NCTC11397","Chalotolerans_YIM70093","Chumireducens_DSM45392","Ckutscheri_DSM20755","Cmaris_DSM45190","Cpseudotuberculosis_31","Cpseudotuberculosis_ATCC19410","Crouxii_FRC0190","Csilvaticum_KL0182","Csimulans_PES1","Ctestudinoris_DSM44614","Culcerans_NCTC12077","Culcerans_NCTC7910","Cvitaeruminis_DSM20294"	0.149143	0.149143	1.92334	0.149143	0.149143	1.92334	258	0
ERS451417_00313	1717.62.peg.314	NA	NA	NA	1	38	Catypicum_R2070,"Caurimucosum_ATCC700975","Cbelfantii_FRC0043","Ccallunae_DSM20147","Ccamporealensis_DSM44610","Cdeserti_GIMN1010","Cdiphtheriae_NCTC11397","Cdoosanense_DSM45436","Cefficiens_YS314","Cepidermidicanis_DSM45586","Cfalsenii_DSM44353","Cglutamicum_ATCC13032","Cglycinophilum_AJ3170","Chalotolerans_YIM70093","Chumireducens_DSM45392","Cimitans_DSM44264","Cjeikeium_K41","Ckroppenstedtii_D…	0.126792	0.126792	2.10058	0.126792	0.126792	2.10058	2	1	1. 0.42683;2. 133;3. 397;4. 159;5. 159;6. 475;7. 213;8. 637;9. 325;10. G;11. GGC
ERS451417_01527	1717.62.peg.1536	NA	NA	NA	1	37	Cargentoratense_DSM44202,"Catypicum_R2070","Caurimucosum_ATCC700975","Cbelfantii_FRC0043","Ccallunae_DSM20147","Ccamporealensis_DSM44610","Cdeserti_GIMN1010","Cdiphtheriae_NCTC11397","Cdoosanense_DSM45436","Cefficiens_YS314","Cepidermidicanis_DSM45586","Cfalsenii_DSM44353","Cglutamicum_ATCC13032","Cglycinophilum_AJ3170","Chalotolerans_YIM70093","Chumireducens_DSM45392","Cimitans_DSM44264","Cjeike…	0.119276	0.119276	1.66506	0.119276	0.119276	1.66505	2	1	1. 0.4882;2. 87;3. 259;4. 115;5. 115;6. 343;7. 150;8. 448;9. 151;10. V;11. GTG
ERS451417_01874	1717.62.peg.1876	NA	NA	NA	1	25	Cargentoratense_DSM44202,"Catypicum_R2070","Cbelfantii_FRC0043","Ccallunae_DSM20147","Cdeserti_GIMN1010","Cdiphtheriae_NCTC11397","Cefficiens_YS314","Cglutamicum_ATCC13032","Cglycinophilum_AJ3170","Chalotolerans_YIM70093","Chumireducens_DSM45392","Ckroppenstedtii_DSM44385","Clactis_RW25","Cmarinum_DSM44953","Cmaris_DSM45190","Cmustelae_DSM45274","Cpseudotuberculosis_31","Cpseudotuberculosis_ATCC1…	0.312956	0.312956	1.30555	0.312956	0.312956	1.30555	7426	0
ERS451417_00391	1717.62.peg.391	NA	NA	NA	1	39	Cargentoratense_DSM44202,"Catypicum_R2070","Caurimucosum_ATCC700975","Cbelfantii_FRC0043","Ccallunae_DSM20147","Ccamporealensis_DSM44610","Cdeserti_GIMN1010","Cdiphtheriae_NCTC11397","Cdoosanense_DSM45436","Cefficiens_YS314","Cepidermidicanis_DSM45586","Cfalsenii_DSM44353","Cglutamicum_ATCC13032","Cglycinophilum_AJ3170","Chalotolerans_YIM70093","Chumireducens_DSM45392","Cimitans_DSM44264","Cjeike…	0.0971543	0.0971543	1.7025	0.0971543	0.0971543	1.70249	258	0
ERS451417_02024	1717.62.peg.2029	NA	NA	NA	1	12	Cargentoratense_DSM44202,"Cdiphtheriae_NCTC11397","Cdoosanense_DSM45436","Cefficiens_YS314","Cepidermidicanis_DSM45586","Ckutscheri_DSM20755","Cpseudotuberculosis_31","Cpseudotuberculosis_ATCC19410","Csilvaticum_KL0182","Culcerans_NCTC12077","Culcerans_NCTC7910","Cureicelerivorans_IMMIBRIV2301"	0.127844	0.127844	2.24036	0.127844	0.127844	2.24035	2050	1	1. 0.44496;2. 116;3. 346;4. 152;5. 121;6. 361;7. 123;8. 367;9. 319;10. Q;11. CAG
ERS451417_01933	1717.62.peg.1930	NA	NA	NA	1	8	Cbelfantii_FRC0043,"Cdiphtheriae_NCTC11397","Cpseudotuberculosis_31","Cpseudotuberculosis_ATCC19410","Csilvaticum_KL0182","Culcerans_NCTC12077","Culcerans_NCTC7910","Cvitaeruminis_DSM20294"	0.0595349	0.0595349	2.21248	0.0595349	0.0595349	2.21248	258	0
ERS451417_01285	1717.62.peg.1293	NA	NA	NA	1	20	Cargentoratense_DSM44202,"Catypicum_R2070","Cbelfantii_FRC0043","Ccallunae_DSM20147","Cdeserti_GIMN1010","Cdiphtheriae_NCTC11397","Cglutamicum_ATCC13032","Chalotolerans_YIM70093","Chumireducens_DSM45392","Cimitans_DSM44264","Ckutscheri_DSM20755","Cmarinum_DSM44953","Cpseudotuberculosis_ATCC19410","CriegeliiPUDD83A45","Csilvaticum_KL0182","Ctestudinoris_DSM44614","Culcerans_NCTC12077","Culcerans_N…	0.273482	0.273482	1.66495	0.273482	0.273482	1.66495	2050	2	1. 0.58672;2. 112;3. 334;4. 121;5. 116;6. 346;7. 122;8. 364;9. 238;10. G;11. GGA	1. 0.49678;2. 115;3. 343;4. 124;5. 119;6. 355;7. 125;8. 373;9. 247;10. H;11. CAT
ERS451417_01764	1717.62.peg.1766	NA	NA	NA	1	13	Cbelfantii_FRC0043,"Cdiphtheriae_NCTC11397","Cglycinophilum_AJ3170","Chalotolerans_YIM70093","Ckutscheri_DSM20755","Cmustelae_DSM45274","Cpseudotuberculosis_31","Cpseudotuberculosis_ATCC19410","Csilvaticum_KL0182","Cterpenotabidum_Y11","Culcerans_NCTC12077","Culcerans_NCTC7910","Cvitaeruminis_DSM20294"	0.252666	0.252666	1.77538	0.252666	0.252666	1.77538	1282	0
ERS451417_01397	1717.62.peg.1410	NA	NA	NA	1	7	Cbelfantii_FRC0043,"Cdiphtheriae_NCTC11397","Cpseudotuberculosis_31","Cpseudotuberculosis_ATCC19410","Csilvaticum_KL0182","Culcerans_NCTC12077","Culcerans_NCTC7910"	0.26253	0.26253	3.2528	0.26253	0.26253	3.2528	2050	3	1. 0.50748;2. 78;3. 232;4. 91;5. 86;6. 256;7. 96;8. 286;9. 124;10. H;11. CAT	1. 0.52877;2. 108;3. 322;4. 123;5. 116;6. 346;7. 126;8. 376;9. 214;10. N;11. AAT	1. 0.63345;2. 217;3. 649;4. 239;5. 231;6. 691;7. 241;8. 721;9. 502;10. D;11. GAT
ERS451417_01604	1717.62.peg.1613	NA	NA	NA	1	7	Cbelfantii_FRC0043,"Cdiphtheriae_NCTC11397","Cpseudotuberculosis_31","Cpseudotuberculosis_ATCC19410","Csilvaticum_KL0182","Culcerans_NCTC12077","Culcerans_NCTC7910"	0.372326	0.372326	4.94015	0.372327	0.372327	4.94009	258	0
ERS451417_01600	1717.62.peg.1609	NA	NA	NA	1	35	Cargentoratense_DSM44202,"Catypicum_R2070","Caurimucosum_ATCC700975","Cbelfantii_FRC0043","Ccallunae_DSM20147","Ccamporealensis_DSM44610","Cdeserti_GIMN1010","Cdiphtheriae_NCTC11397","Cdoosanense_DSM45436","Cefficiens_YS314","Cepidermidicanis_DSM45586","Cglutamicum_ATCC13032","Cglycinophilum_AJ3170","Chalotolerans_YIM70093","Chumireducens_DSM45392","Cimitans_DSM44264","Cjeikeium_K41","Ckutscheri_…	0.247465	0.247465	1.74056	0.247465	0.247465	1.74056	3074	1	1. 0.47565;2. 65;3. 193;4. 123;5. 74;6. 220;7. 88;8. 262;9. 139;10. A;11. GCA
ERS451417_00401	1717.62.peg.401	NA	NA	NA	1	38	Cargentoratense_DSM44202,"Catypicum_R2070","Caurimucosum_ATCC700975","Cbelfantii_FRC0043","Ccallunae_DSM20147","Ccamporealensis_DSM44610","Cdeserti_GIMN1010","Cdiphtheriae_NCTC11397","Cdoosanense_DSM45436","Cefficiens_YS314","Cepidermidicanis_DSM45586","Cfalsenii_DSM44353","Cglutamicum_ATCC13032","Cglycinophilum_AJ3170","Chalotolerans_YIM70093","Chumireducens_DSM45392","Cimitans_DSM44264","Cjeike…	0.109608	0.109608	1.91682	0.109608	0.109608	1.91682	2306	0
ERS451417_01558	1717.62.peg.1567	NA	NA	NA	1	38	Cargentoratense_DSM44202,"Catypicum_R2070","Caurimucosum_ATCC700975","Cbelfantii_FRC0043","Ccallunae_DSM20147","Ccamporealensis_DSM44610","Cdeserti_GIMN1010","Cdiphtheriae_NCTC11397","Cdoosanense_DSM45436","Cefficiens_YS314","Cepidermidicanis_DSM45586","Cfalsenii_DSM44353","Cglutamicum_ATCC13032","Cglycinophilum_AJ3170","Chalotolerans_YIM70093","Chumireducens_DSM45392","Cimitans_DSM44264","Cjeike…	0.218104	0.218104	1.5827	0.218113	0.218113	1.5827	1282	0
ERS451417_01638	1717.62.peg.1645	NA	NA	NA	1	26	Cargentoratense_DSM44202,"Catypicum_R2070","Caurimucosum_ATCC700975","Cbelfantii_FRC0043","Ccallunae_DSM20147","Ccamporealensis_DSM44610","Cdeserti_GIMN1010","Cdiphtheriae_NCTC11397","Cdoosanense_DSM45436","Cefficiens_YS314","Cepidermidicanis_DSM45586","Cglutamicum_ATCC13032","Chalotolerans_YIM70093","Cimitans_DSM44264","Ckutscheri_DSM20755","Cmustelae_DSM45274","Cpseudotuberculosis_31","Cpseudot…	0.128738	0.128738	1.67594	0.128738	0.128738	1.67595	3330	0
ERS451417_00639	1717.62.peg.643	NA	NA	NA	1	19	Cargentoratense_DSM44202,"Cbelfantii_FRC0043","Cdiphtheriae_NCTC11397","Cepidermidicanis_DSM45586","Cfalsenii_DSM44353","Cglycinophilum_AJ3170","Chalotolerans_YIM70093","Chumireducens_DSM45392","Clactis_RW25","Cmarinum_DSM44953","Cmustelae_DSM45274","Cpseudotuberculosis_31","Cpseudotuberculosis_ATCC19410","Crouxii_FRC0190","Csilvaticum_KL0182","Ctestudinoris_DSM44614","Culcerans_NCTC12077","Culce…	0.137672	0.137672	1.69543	0.137672	0.137672	1.69543	2	4	1. 0.50524;2. 15;3. 43;4. 15;5. 15;6. 43;7. 15;8. 43;9. 40;10. A;11. GCA	1. 0.57651;2. 154;3. 460;4. 173;5. 173;6. 517;7. 205;8. 613;9. 388;10. K;11. AAA	1. 0.44421;2. 286;3. 856;4. 333;5. 333;6. 997;7. 372;8. 1114;9. 742;10. Y;11. TAT	1. 0.4938;2. 408;3. 1222;4. 459;5. 459;6. 1375;7. 499;8. 1495;9. 1054;10. I;11. ATC
ERS451417_00953	1717.62.peg.960	NA	NA	NA	1	39	Cargentoratense_DSM44202,"Catypicum_R2070","Caurimucosum_ATCC700975","Cbelfantii_FRC0043","Ccallunae_DSM20147","Ccamporealensis_DSM44610","Cdeserti_GIMN1010","Cdiphtheriae_NCTC11397","Cdoosanense_DSM45436","Cefficiens_YS314","Cepidermidicanis_DSM45586","Cfalsenii_DSM44353","Cglutamicum_ATCC13032","Cglycinophilum_AJ3170","Chalotolerans_YIM70093","Chumireducens_DSM45392","Cimitans_DSM44264","Cjeike…	0.174732	0.174732	1.76809	0.174732	0.174732	1.76809	258	0
ERS451417_00457	1717.62.peg.461	NA	NA	NA	1	39	Cargentoratense_DSM44202,"Catypicum_R2070","Caurimucosum_ATCC700975","Cbelfantii_FRC0043","Ccallunae_DSM20147","Ccamporealensis_DSM44610","Cdeserti_GIMN1010","Cdiphtheriae_NCTC11397","Cdoosanense_DSM45436","Cefficiens_YS314","Cepidermidicanis_DSM45586","Cfalsenii_DSM44353","Cglutamicum_ATCC13032","Cglycinophilum_AJ3170","Chalotolerans_YIM70093","Chumireducens_DSM45392","Cimitans_DSM44264","Cjeike…	0.202454	0.202454	1.97889	0.202454	0.202454	1.97889	258	0
ERS451417_00777	1717.62.peg.784	NA	NA	NA	1	39	Cargentoratense_DSM44202,"Catypicum_R2070","Caurimucosum_ATCC700975","Cbelfantii_FRC0043","Ccallunae_DSM20147","Ccamporealensis_DSM44610","Cdeserti_GIMN1010","Cdiphtheriae_NCTC11397","Cdoosanense_DSM45436","Cefficiens_YS314","Cepidermidicanis_DSM45586","Cfalsenii_DSM44353","Cglutamicum_ATCC13032","Cglycinophilum_AJ3170","Chalotolerans_YIM70093","Chumireducens_DSM45392","Cimitans_DSM44264","Cjeike…	0.157254	0.157254	1.90089	0.157254	0.157254	1.9009	258	0
ERS451417_01425	1717.62.peg.1431	NA	NA	NA	1	37	Cargentoratense_DSM44202,"Catypicum_R2070","Caurimucosum_ATCC700975","Cbelfantii_FRC0043","Ccallunae_DSM20147","Ccamporealensis_DSM44610","Cdeserti_GIMN1010","Cdiphtheriae_NCTC11397","Cdoosanense_DSM45436","Cefficiens_YS314","Cepidermidicanis_DSM45586","Cfalsenii_DSM44353","Cglutamicum_ATCC13032","Cglycinophilum_AJ3170","Chalotolerans_YIM70093","Chumireducens_DSM45392","Cimitans_DSM44264","Cjeike…	0.185407	0.185407	1.41522	0.185398	0.185398	1.41522	258	0
ERS451417_00388	1717.62.peg.388	NA	NA	NA	1	18	Cbelfantii_FRC0043,"Cdiphtheriae_NCTC11397","Cepidermidicanis_DSM45586","Chumireducens_DSM45392","Ckutscheri_DSM20755","Clactis_RW25","Cmarinum_DSM44953","Cmustelae_DSM45274","Cpseudotuberculosis_31","Cpseudotuberculosis_ATCC19410","Crouxii_FRC0190","Csilvaticum_KL0182","Csimulans_PES1","Ctestudinoris_DSM44614","Culcerans_NCTC12077","Culcerans_NCTC7910","Curealyticum_DSM7109","Cvitaeruminis_DSM20…	0.141448	0.141448	1.78785	0.141457	0.141457	1.78785	258	0
ERS451417_00578	1717.62.peg.581	NA	NA	NA	1	34	Cargentoratense_DSM44202,"Catypicum_R2070","Caurimucosum_ATCC700975","Cbelfantii_FRC0043","Ccallunae_DSM20147","Ccamporealensis_DSM44610","Cdeserti_GIMN1010","Cdiphtheriae_NCTC11397","Cdoosanense_DSM45436","Cefficiens_YS314","Cepidermidicanis_DSM45586","Cglutamicum_ATCC13032","Chalotolerans_YIM70093","Chumireducens_DSM45392","Cimitans_DSM44264","Ckroppenstedtii_DSM44385","Ckutscheri_DSM20755","Cl…	0.161908	0.161908	1.98683	0.161898	0.161898	1.98684	258	0
ERS451417_01829	1717.62.peg.1833	NA	NA	NA	1	25	Catypicum_R2070,"Caurimucosum_ATCC700975","Cbelfantii_FRC0043","Ccallunae_DSM20147","Ccamporealensis_DSM44610","Cdeserti_GIMN1010","Cdiphtheriae_NCTC11397","Cdoosanense_DSM45436","Cefficiens_YS314","Cglutamicum_ATCC13032","Cglycinophilum_AJ3170","Chalotolerans_YIM70093","Chumireducens_DSM45392","Cimitans_DSM44264","Cmaris_DSM45190","Cpseudotuberculosis_31","Cpseudotuberculosis_ATCC19410","Csilvat…	0.245449	0.245449	1.87104	0.245449	0.245449	1.87104	3330	0
ERS451417_01597	1717.62.peg.1606	NA	NA	NA	1	19	Cargentoratense_DSM44202,"Cbelfantii_FRC0043","Ccallunae_DSM20147","Cdeserti_GIMN1010","Cdiphtheriae_NCTC11397","Cefficiens_YS314","Cepidermidicanis_DSM45586","Cglutamicum_ATCC13032","Chalotolerans_YIM70093","Chumireducens_DSM45392","Ckutscheri_DSM20755","Cmarinum_DSM44953","Cpseudotuberculosis_31","Cpseudotuberculosis_ATCC19410","Csilvaticum_KL0182","Ctestudinoris_DSM44614","Culcerans_NCTC12077"…	0.271067	0.271067	2.14993	0.271067	0.271067	2.14993	1282	0
ERS451417_00302	1717.62.peg.303	NA	NA	NA	1	22	Catypicum_R2070,"Caurimucosum_ATCC700975","Cbelfantii_FRC0043","Ccamporealensis_DSM44610","Cdiphtheriae_NCTC11397","Cepidermidicanis_DSM45586","Chumireducens_DSM45392","Cimitans_DSM44264","Cmarinum_DSM44953","Cmustelae_DSM45274","Cpseudotuberculosis_31","Cpseudotuberculosis_ATCC19410","CriegeliiPUDD83A45","Crouxii_FRC0190","Csilvaticum_KL0182","Csimulans_PES1","Csingulare_IBSB52218","Ctestudinori…	0.105787	0.105787	2.07503	0.105796	0.105796	2.07503	258	0
ERS451417_02323	1717.62.peg.2350	NA	NA	NA	1	18	Catypicum_R2070,"Cbelfantii_FRC0043","Ccallunae_DSM20147","Cdiphtheriae_NCTC11397","Chalotolerans_YIM70093","Chumireducens_DSM45392","Ckutscheri_DSM20755","Cmarinum_DSM44953","Cmustelae_DSM45274","Cpseudotuberculosis_31","Cpseudotuberculosis_ATCC19410","CriegeliiPUDD83A45","Csilvaticum_KL0182","Ctestudinoris_DSM44614","Culcerans_NCTC12077","Culcerans_NCTC7910","Cureicelerivorans_IMMIBRIV2301","Cv…	0.301974	0.301974	1.32826	0.301974	0.301974	1.32826	3074	1	1. 0.57226;2. 112;3. 334;4. 136;5. 134;6. 400;7. 159;8. 475;9. 259;10. V;11. GTA
ERS451417_00474	1717.62.peg.477	NA	NA	NA	1	39	Cargentoratense_DSM44202,"Catypicum_R2070","Caurimucosum_ATCC700975","Cbelfantii_FRC0043","Ccallunae_DSM20147","Ccamporealensis_DSM44610","Cdeserti_GIMN1010","Cdiphtheriae_NCTC11397","Cdoosanense_DSM45436","Cefficiens_YS314","Cepidermidicanis_DSM45586","Cfalsenii_DSM44353","Cglutamicum_ATCC13032","Cglycinophilum_AJ3170","Chalotolerans_YIM70093","Chumireducens_DSM45392","Cimitans_DSM44264","Cjeike…	0.111791	0.111791	1.89618	0.111791	0.111791	1.89618	258	0
ERS451417_00835	1717.62.peg.839	NA	NA	NA	1	39	Cargentoratense_DSM44202,"Catypicum_R2070","Caurimucosum_ATCC700975","Cbelfantii_FRC0043","Ccallunae_DSM20147","Ccamporealensis_DSM44610","Cdeserti_GIMN1010","Cdiphtheriae_NCTC11397","Cdoosanense_DSM45436","Cefficiens_YS314","Cepidermidicanis_DSM45586","Cfalsenii_DSM44353","Cglutamicum_ATCC13032","Cglycinophilum_AJ3170","Chalotolerans_YIM70093","Chumireducens_DSM45392","Cimitans_DSM44264","Cjeike…	0.179423	0.179423	1.93705	0.179423	0.179423	1.93704	258	0
ERS451417_01292	1717.62.peg.1300	NA	NA	NA	1	38	Cargentoratense_DSM44202,"Catypicum_R2070","Caurimucosum_ATCC700975","Cbelfantii_FRC0043","Ccallunae_DSM20147","Ccamporealensis_DSM44610","Cdeserti_GIMN1010","Cdiphtheriae_NCTC11397","Cdoosanense_DSM45436","Cefficiens_YS314","Cepidermidicanis_DSM45586","Cfalsenii_DSM44353","Cglutamicum_ATCC13032","Cglycinophilum_AJ3170","Chalotolerans_YIM70093","Chumireducens_DSM45392","Cimitans_DSM44264","Cjeike…	0.178979	0.178979	1.67138	0.178979	0.178979	1.67138	2050	1	1. 0.50907;2. 354;3. 1060;4. 376;5. 376;6. 1126;7. 392;8. 1174;9. 811;10. K;11. AAG
ERS451417_01353	1717.62.peg.1361	NA	NA	NA	1	38	Cargentoratense_DSM44202,"Catypicum_R2070","Caurimucosum_ATCC700975","Cbelfantii_FRC0043","Ccallunae_DSM20147","Ccamporealensis_DSM44610","Cdeserti_GIMN1010","Cdiphtheriae_NCTC11397","Cdoosanense_DSM45436","Cefficiens_YS314","Cepidermidicanis_DSM45586","Cfalsenii_DSM44353","Cglutamicum_ATCC13032","Cglycinophilum_AJ3170","Chalotolerans_YIM70093","Chumireducens_DSM45392","Cimitans_DSM44264","Cjeike…	0.127805	0.127805	1.89659	0.127805	0.127805	1.89658	2	1	1. 0.5959;2. 465;3. 1393;4. 472;5. 472;6. 1414;7. 477;8. 1429;9. 1300;10. D;11. GAT
ERS451417_00670	1717.62.peg.677	NA	NA	NA	1	16	Cargentoratense_DSM44202,"Cbelfantii_FRC0043","Cdiphtheriae_NCTC11397","Cefficiens_YS314","Cepidermidicanis_DSM45586","Ckroppenstedtii_DSM44385","Ckutscheri_DSM20755","Clactis_RW25","Cmustelae_DSM45274","Cpseudotuberculosis_31","Cpseudotuberculosis_ATCC19410","Crouxii_FRC0190","Csilvaticum_KL0182","Culcerans_NCTC12077","Culcerans_NCTC7910","Cvitaeruminis_DSM20294"	0.0865108	0.0865108	2.18709	0.0865108	0.0865108	2.18709	258	0
ERS451417_01055	1717.62.peg.1066	NA	NA	NA	1	39	Cargentoratense_DSM44202,"Catypicum_R2070","Caurimucosum_ATCC700975","Cbelfantii_FRC0043","Ccallunae_DSM20147","Ccamporealensis_DSM44610","Cdeserti_GIMN1010","Cdiphtheriae_NCTC11397","Cdoosanense_DSM45436","Cefficiens_YS314","Cepidermidicanis_DSM45586","Cfalsenii_DSM44353","Cglutamicum_ATCC13032","Cglycinophilum_AJ3170","Chalotolerans_YIM70093","Chumireducens_DSM45392","Cimitans_DSM44264","Cjeike…	0.142506	0.142506	1.8109	0.142506	0.142506	1.8109	258	0
ERS451417_00778	1717.62.peg.785	NA	NA	NA	1	39	Cargentoratense_DSM44202,"Catypicum_R2070","Caurimucosum_ATCC700975","Cbelfantii_FRC0043","Ccallunae_DSM20147","Ccamporealensis_DSM44610","Cdeserti_GIMN1010","Cdiphtheriae_NCTC11397","Cdoosanense_DSM45436","Cefficiens_YS314","Cepidermidicanis_DSM45586","Cfalsenii_DSM44353","Cglutamicum_ATCC13032","Cglycinophilum_AJ3170","Chalotolerans_YIM70093","Chumireducens_DSM45392","Cimitans_DSM44264","Cjeike…	0.274833	0.190284	1.82908	0.274833	0.190284	1.82908	3074	4	1. 0.71065;2. 236;3. 706;4. 281;5. 281;6. 841;7. 314;8. 940;9. 517;10. F;11. TTT	1. 0.65294;2. 243;3. 727;4. 288;5. 288;6. 862;7. 321;8. 961;9. 538;10. S;11. TCG	1. 0.7036;2. 245;3. 733;4. 290;5. 290;6. 868;7. 323;8. 967;9. 544;10. L;11. TTG	1. 0.48626;2. 256;3. 766;4. 301;5. 301;6. 901;7. 334;8. 1000;9. 577;10. S;11. TCC
ERS451417_01803	1717.62.peg.1809	NA	NA	NA	1	38	Cargentoratense_DSM44202,"Catypicum_R2070","Caurimucosum_ATCC700975","Cbelfantii_FRC0043","Ccallunae_DSM20147","Ccamporealensis_DSM44610","Cdeserti_GIMN1010","Cdiphtheriae_NCTC11397","Cdoosanense_DSM45436","Cefficiens_YS314","Cepidermidicanis_DSM45586","Cfalsenii_DSM44353","Cglutamicum_ATCC13032","Cglycinophilum_AJ3170","Chalotolerans_YIM70093","Chumireducens_DSM45392","Cimitans_DSM44264","Cjeike…	0.178795	0.178795	1.80236	0.178795	0.178795	1.80237	2	1	1. 0.45778;2. 173;3. 517;4. 192;5. 192;6. 574;7. 213;8. 637;9. 460;10. G;11. GGC
ERS451417_00812	1717.62.peg.818	NA	NA	NA	1	39	Cargentoratense_DSM44202,"Catypicum_R2070","Caurimucosum_ATCC700975","Cbelfantii_FRC0043","Ccallunae_DSM20147","Ccamporealensis_DSM44610","Cdeserti_GIMN1010","Cdiphtheriae_NCTC11397","Cdoosanense_DSM45436","Cefficiens_YS314","Cepidermidicanis_DSM45586","Cfalsenii_DSM44353","Cglutamicum_ATCC13032","Cglycinophilum_AJ3170","Chalotolerans_YIM70093","Chumireducens_DSM45392","Cimitans_DSM44264","Cjeike…	0.0902305	0.0902305	1.79278	0.0902305	0.0902305	1.79278	3330	0
ERS451417_00195	1717.62.peg.192	NA	NA	NA	1	32	Cargentoratense_DSM44202,"Catypicum_R2070","Caurimucosum_ATCC700975","Cbelfantii_FRC0043","Ccallunae_DSM20147","Ccamporealensis_DSM44610","Cdeserti_GIMN1010","Cdiphtheriae_NCTC11397","Cefficiens_YS314","Cepidermidicanis_DSM45586","Cfalsenii_DSM44353","Cglutamicum_ATCC13032","Cglycinophilum_AJ3170","Chumireducens_DSM45392","Cjeikeium_K41","Ckutscheri_DSM20755","Clactis_RW25","Cmarinum_DSM44953","C…	0.28866	0.28866	1.73188	0.28866	0.28866	1.73188	3330	0
ERS451417_00875	1717.62.peg.881	NA	NA	NA	1	24	Catypicum_R2070,"Cbelfantii_FRC0043","Ccallunae_DSM20147","Ccamporealensis_DSM44610","Cdeserti_GIMN1010","Cdiphtheriae_NCTC11397","Cdoosanense_DSM45436","Cefficiens_YS314","Cepidermidicanis_DSM45586","Chalotolerans_YIM70093","Chumireducens_DSM45392","Cimitans_DSM44264","Ckutscheri_DSM20755","Cmarinum_DSM44953","Cmaris_DSM45190","Cmustelae_DSM45274","Cpseudotuberculosis_31","Cpseudotuberculosis_AT…	0.246404	0.246404	1.62931	0.246404	0.246404	1.62931	3330	0
ERS451417_01186	1717.62.peg.1195	NA	NA	NA	1	10	Cbelfantii_FRC0043,"Cdiphtheriae_NCTC11397","Cmustelae_DSM45274","Cpseudotuberculosis_31","Cpseudotuberculosis_ATCC19410","Crouxii_FRC0190","Csilvaticum_KL0182","Culcerans_NCTC12077","Culcerans_NCTC7910","Cvitaeruminis_DSM20294"	0.123748	0.123748	3.98984	0.123748	0.123748	3.98983	258	0
ERS451417_01951	1717.62.peg.1951	NA	NA	NA	1	38	Cargentoratense_DSM44202,"Catypicum_R2070","Caurimucosum_ATCC700975","Cbelfantii_FRC0043","Ccallunae_DSM20147","Ccamporealensis_DSM44610","Cdeserti_GIMN1010","Cdiphtheriae_NCTC11397","Cdoosanense_DSM45436","Cefficiens_YS314","Cepidermidicanis_DSM45586","Cfalsenii_DSM44353","Cglutamicum_ATCC13032","Cglycinophilum_AJ3170","Chalotolerans_YIM70093","Chumireducens_DSM45392","Cimitans_DSM44264","Cjeike…	0.127699	0.127699	1.85499	0.127699	0.127699	1.85499	258	0
ERS451417_00511	1717.62.peg.515	NA	NA	NA	1	33	Cargentoratense_DSM44202,"Catypicum_R2070","Caurimucosum_ATCC700975","Cbelfantii_FRC0043","Ccallunae_DSM20147","Ccamporealensis_DSM44610","Cdeserti_GIMN1010","Cdiphtheriae_NCTC11397","Cdoosanense_DSM45436","Cefficiens_YS314","Cepidermidicanis_DSM45586","Cglutamicum_ATCC13032","Cglycinophilum_AJ3170","Chalotolerans_YIM70093","Chumireducens_DSM45392","Cimitans_DSM44264","Ckutscheri_DSM20755","Cmari…	0.175446	0.175446	1.77006	0.175446	0.175446	1.77006	1282	0
ERS451417_00928	1717.62.peg.935	NA	NA	NA	1	20	Caurimucosum_ATCC700975,"Cbelfantii_FRC0043","Ccamporealensis_DSM44610","Cdiphtheriae_NCTC11397","Cdoosanense_DSM45436","Chalotolerans_YIM70093","Chumireducens_DSM45392","Cmarinum_DSM44953","Cmaris_DSM45190","Cpseudotuberculosis_31","Cpseudotuberculosis_ATCC19410","Crouxii_FRC0190","Csilvaticum_KL0182","Csimulans_PES1","Csingulare_IBSB52218","Ctestudinoris_DSM44614","Culcerans_NCTC12077","Culcera…	0.201561	0.201561	1.57969	0.201561	0.201561	1.57969	3330	0
ERS451417_00794	1717.62.peg.800	NA	NA	NA	1	36	Cargentoratense_DSM44202,"Caurimucosum_ATCC700975","Cbelfantii_FRC0043","Ccallunae_DSM20147","Ccamporealensis_DSM44610","Cdeserti_GIMN1010","Cdiphtheriae_NCTC11397","Cdoosanense_DSM45436","Cefficiens_YS314","Cepidermidicanis_DSM45586","Cfalsenii_DSM44353","Cglutamicum_ATCC13032","Cglycinophilum_AJ3170","Chalotolerans_YIM70093","Chumireducens_DSM45392","Cimitans_DSM44264","Cjeikeium_K41","Ckutsche…	0.152989	0.152989	1.99375	0.152989	0.152989	1.99375	2	2	1. 0.4022;2. 46;3. 136;4. 148;5. 148;6. 442;7. 178;8. 532;9. 91;10. V;11. GTG	1. 0.44637;2. 259;3. 775;4. 368;5. 368;6. 1102;7. 407;8. 1219;9. 631;10. I;11. ATC
ERS451417_00095	1717.62.peg.93	NA	NA	NA	1	11	Cbelfantii_FRC0043,"Cdiphtheriae_NCTC11397","Cglutamicum_ATCC13032","Cglycinophilum_AJ3170","Cpseudotuberculosis_31","Cpseudotuberculosis_ATCC19410","Crouxii_FRC0190","Csilvaticum_KL0182","Cterpenotabidum_Y11","Culcerans_NCTC12077","Culcerans_NCTC7910"	0.0745362	0.0745362	1.93962	0.0745362	0.0745362	1.93962	2306	0
ERS451417_00818	1717.62.peg.824	NA	NA	NA	1	39	Cargentoratense_DSM44202,"Catypicum_R2070","Caurimucosum_ATCC700975","Cbelfantii_FRC0043","Ccallunae_DSM20147","Ccamporealensis_DSM44610","Cdeserti_GIMN1010","Cdiphtheriae_NCTC11397","Cdoosanense_DSM45436","Cefficiens_YS314","Cepidermidicanis_DSM45586","Cfalsenii_DSM44353","Cglutamicum_ATCC13032","Cglycinophilum_AJ3170","Chalotolerans_YIM70093","Chumireducens_DSM45392","Cimitans_DSM44264","Cjeike…	0.20858	0.20858	1.88025	0.20858	0.20858	1.88025	258	0
ERS451417_01986	1717.62.peg.1986	NA	NA	NA	1	26	Cargentoratense_DSM44202,"Caurimucosum_ATCC700975","Cbelfantii_FRC0043","Ccallunae_DSM20147","Ccamporealensis_DSM44610","Cdeserti_GIMN1010","Cdiphtheriae_NCTC11397","Cdoosanense_DSM45436","Cepidermidicanis_DSM45586","Chalotolerans_YIM70093","Chumireducens_DSM45392","Clactis_RW25","Cmarinum_DSM44953","Cmustelae_DSM45274","Cpseudotuberculosis_31","Cpseudotuberculosis_ATCC19410","CriegeliiPUDD83A45"…	0.04915	0.04915	1.36268	0.04915	0.04915	1.36268	258	0
ERS451417_01333	1717.62.peg.1341	NA	NA	NA	1	38	Cargentoratense_DSM44202,"Catypicum_R2070","Caurimucosum_ATCC700975","Cbelfantii_FRC0043","Ccallunae_DSM20147","Ccamporealensis_DSM44610","Cdeserti_GIMN1010","Cdiphtheriae_NCTC11397","Cdoosanense_DSM45436","Cefficiens_YS314","Cepidermidicanis_DSM45586","Cfalsenii_DSM44353","Cglutamicum_ATCC13032","Cglycinophilum_AJ3170","Chalotolerans_YIM70093","Chumireducens_DSM45392","Cimitans_DSM44264","Cjeike…	0.132767	0.132767	1.79503	0.132767	0.132767	1.79503	1282	0
ERS451417_02066	1717.62.peg.2078	NA	NA	NA	1	38	Cargentoratense_DSM44202,"Catypicum_R2070","Caurimucosum_ATCC700975","Cbelfantii_FRC0043","Ccallunae_DSM20147","Ccamporealensis_DSM44610","Cdeserti_GIMN1010","Cdiphtheriae_NCTC11397","Cdoosanense_DSM45436","Cefficiens_YS314","Cepidermidicanis_DSM45586","Cfalsenii_DSM44353","Cglutamicum_ATCC13032","Cglycinophilum_AJ3170","Chalotolerans_YIM70093","Chumireducens_DSM45392","Cimitans_DSM44264","Cjeike…	0.0917869	0.0917869	2.21559	0.0917871	0.0917871	2.21558	258	0
ERS451417_01607	1717.62.peg.1616	NA	NA	NA	1	5	Cbelfantii_FRC0043,"Cdiphtheriae_NCTC11397","Cpseudotuberculosis_ATCC19410","Culcerans_NCTC12077","Culcerans_NCTC7910"	0.25914	0.25914	3.001	0.25914	0.25914	3.00101	4354	0
ERS451417_00182	1717.62.peg.178	NA	NA	NA	1	36	Cargentoratense_DSM44202,"Catypicum_R2070","Caurimucosum_ATCC700975","Cbelfantii_FRC0043","Ccallunae_DSM20147","Ccamporealensis_DSM44610","Cdeserti_GIMN1010","Cdiphtheriae_NCTC11397","Cdoosanense_DSM45436","Cefficiens_YS314","Cepidermidicanis_DSM45586","Cfalsenii_DSM44353","Cglutamicum_ATCC13032","Cglycinophilum_AJ3170","Chalotolerans_YIM70093","Chumireducens_DSM45392","Cjeikeium_K41","Ckroppenst…	0.250914	0.250914	1.32227	0.250914	0.250914	1.32227	1026	1	1. 0.69367;2. 43;3. 127;4. 58;5. 58;6. 172;7. 62;8. 184;9. 109;10. I;11. ATT
ERS451417_00728	1717.62.peg.731	NA	NA	NA	1	14	Cbelfantii_FRC0043,"Ccallunae_DSM20147","Cdeserti_GIMN1010","Cdiphtheriae_NCTC11397","Cefficiens_YS314","Cglutamicum_ATCC13032","Ckutscheri_DSM20755","Cpseudotuberculosis_31","Cpseudotuberculosis_ATCC19410","Crouxii_FRC0190","Csilvaticum_KL0182","Culcerans_NCTC12077","Culcerans_NCTC7910","Cvitaeruminis_DSM20294"	0.0872472	0.0872472	1.82291	0.0872472	0.0872472	1.8229	258	0
ERS451417_01741	1717.62.peg.1745	NA	NA	NA	1	38	Cargentoratense_DSM44202,"Catypicum_R2070","Caurimucosum_ATCC700975","Cbelfantii_FRC0043","Ccallunae_DSM20147","Ccamporealensis_DSM44610","Cdeserti_GIMN1010","Cdiphtheriae_NCTC11397","Cdoosanense_DSM45436","Cefficiens_YS314","Cepidermidicanis_DSM45586","Cfalsenii_DSM44353","Cglutamicum_ATCC13032","Cglycinophilum_AJ3170","Chalotolerans_YIM70093","Chumireducens_DSM45392","Cimitans_DSM44264","Cjeike…	0.103661	0.103661	1.47178	0.103661	0.103661	1.47178	258	0
ERS451417_01950	1717.62.peg.1950	NA	NA	NA	1	38	Cargentoratense_DSM44202,"Catypicum_R2070","Caurimucosum_ATCC700975","Cbelfantii_FRC0043","Ccallunae_DSM20147","Ccamporealensis_DSM44610","Cdeserti_GIMN1010","Cdiphtheriae_NCTC11397","Cdoosanense_DSM45436","Cefficiens_YS314","Cepidermidicanis_DSM45586","Cfalsenii_DSM44353","Cglutamicum_ATCC13032","Cglycinophilum_AJ3170","Chalotolerans_YIM70093","Chumireducens_DSM45392","Cimitans_DSM44264","Cjeike…	0.179021	0.149162	1.6007	0.179021	0.149162	1.6007	2	2	1. 0.60282;2. 166;3. 496;4. 170;5. 170;6. 508;7. 181;8. 541;9. 391;10. D;11. GAT	1. 0.56678;2. 174;3. 520;4. 178;5. 178;6. 532;7. 189;8. 565;9. 415;10. D;11. GAT
ERS451417_01964	1717.62.peg.1964	NA	NA	NA	1	30	Cargentoratense_DSM44202,"Catypicum_R2070","Caurimucosum_ATCC700975","Cbelfantii_FRC0043","Ccallunae_DSM20147","Cdeserti_GIMN1010","Cdiphtheriae_NCTC11397","Cdoosanense_DSM45436","Cepidermidicanis_DSM45586","Cfalsenii_DSM44353","Cglutamicum_ATCC13032","Cglycinophilum_AJ3170","Chalotolerans_YIM70093","Chumireducens_DSM45392","Cimitans_DSM44264","Cjeikeium_K41","Ckroppenstedtii_DSM44385","Clactis_R…	0.163353	0.163353	1.67945	0.163353	0.163353	1.67946	258	0
ERS451417_02001	1717.62.peg.2005	NA	NA	NA	1	7	Cbelfantii_FRC0043,"Cdiphtheriae_NCTC11397","Cpseudotuberculosis_31","Cpseudotuberculosis_ATCC19410","Csilvaticum_KL0182","Culcerans_NCTC12077","Culcerans_NCTC7910"	0.231554	0.231554	3.02133	0.231554	0.231554	3.02133	2	2	1. 0.55017;2. 196;3. 586;4. 197;5. 197;6. 589;7. 197;8. 589;9. 586;10. V;11. GTG	1. 0.4172;2. 226;3. 676;4. 227;5. 227;6. 679;7. 227;8. 679;9. 676;10. E;11. GAG
ERS451417_00902	1717.62.peg.908	NA	NA	NA	1	32	Cargentoratense_DSM44202,"Catypicum_R2070","Cbelfantii_FRC0043","Ccallunae_DSM20147","Cdeserti_GIMN1010","Cdiphtheriae_NCTC11397","Cdoosanense_DSM45436","Cefficiens_YS314","Cepidermidicanis_DSM45586","Cfalsenii_DSM44353","Cglutamicum_ATCC13032","Cglycinophilum_AJ3170","Chalotolerans_YIM70093","Chumireducens_DSM45392","Cjeikeium_K41","Ckroppenstedtii_DSM44385","Ckutscheri_DSM20755","Clactis_RW25",…	0.0964438	0.0964438	1.849	0.0964438	0.0964438	1.849	2	1	1. 0.49443;2. 229;3. 685;4. 256;5. 233;6. 697;7. 240;8. 718;9. 505;10. I;11. ATC
ERS451417_02226	1717.62.peg.2251	NA	NA	NA	1	6	Cbelfantii_FRC0043,"Cdiphtheriae_NCTC11397","Cpseudotuberculosis_31","Cpseudotuberculosis_ATCC19410","Culcerans_NCTC12077","Culcerans_NCTC7910"	0.148691	0.148691	2.61824	0.148691	0.148691	2.61824	4098	1	1. 0.46987;2. 10;3. 28;4. 50;5. 15;6. 43;7. 14;8. 40;9. 10;10. V;11. GTC
ERS451417_00846	1717.62.peg.851	NA	NA	NA	1	39	Cargentoratense_DSM44202,"Catypicum_R2070","Caurimucosum_ATCC700975","Cbelfantii_FRC0043","Ccallunae_DSM20147","Ccamporealensis_DSM44610","Cdeserti_GIMN1010","Cdiphtheriae_NCTC11397","Cdoosanense_DSM45436","Cefficiens_YS314","Cepidermidicanis_DSM45586","Cfalsenii_DSM44353","Cglutamicum_ATCC13032","Cglycinophilum_AJ3170","Chalotolerans_YIM70093","Chumireducens_DSM45392","Cimitans_DSM44264","Cjeike…	0.189714	0.189714	1.77796	0.189724	0.189724	1.77795	2	1	1. 0.5168;2. 224;3. 670;4. 238;5. 238;6. 712;7. 292;8. 874;9. 583;10. A;11. GCA
ERS451417_01995	1717.62.peg.1998	NA	NA	NA	1	38	Cargentoratense_DSM44202,"Catypicum_R2070","Caurimucosum_ATCC700975","Cbelfantii_FRC0043","Ccallunae_DSM20147","Ccamporealensis_DSM44610","Cdeserti_GIMN1010","Cdiphtheriae_NCTC11397","Cdoosanense_DSM45436","Cefficiens_YS314","Cepidermidicanis_DSM45586","Cfalsenii_DSM44353","Cglutamicum_ATCC13032","Cglycinophilum_AJ3170","Chalotolerans_YIM70093","Chumireducens_DSM45392","Cimitans_DSM44264","Cjeike…	0.110589	0.110589	1.98756	0.110589	0.110589	1.98756	3330	0
ERS451417_00208	1717.62.peg.205	NA	NA	NA	1	37	Cargentoratense_DSM44202,"Catypicum_R2070","Caurimucosum_ATCC700975","Cbelfantii_FRC0043","Ccallunae_DSM20147","Ccamporealensis_DSM44610","Cdeserti_GIMN1010","Cdiphtheriae_NCTC11397","Cdoosanense_DSM45436","Cefficiens_YS314","Cepidermidicanis_DSM45586","Cfalsenii_DSM44353","Cglutamicum_ATCC13032","Cglycinophilum_AJ3170","Chalotolerans_YIM70093","Chumireducens_DSM45392","Cimitans_DSM44264","Cjeike…	0.145375	0.145375	1.72383	0.145366	0.145366	1.72383	1282	0
ERS451417_01856	1717.62.peg.1858	NA	NA	NA	1	33	Cargentoratense_DSM44202,"Catypicum_R2070","Caurimucosum_ATCC700975","Cbelfantii_FRC0043","Ccallunae_DSM20147","Ccamporealensis_DSM44610","Cdeserti_GIMN1010","Cdiphtheriae_NCTC11397","Cdoosanense_DSM45436","Cefficiens_YS314","Cepidermidicanis_DSM45586","Cfalsenii_DSM44353","Cglutamicum_ATCC13032","Chalotolerans_YIM70093","Chumireducens_DSM45392","Cimitans_DSM44264","Cjeikeium_K41","Ckroppenstedti…	0.120589	0.104583	1.27134	0.120589	0.104583	1.27134	3074	2	1. 0.61183;2. 45;3. 133;4. 46;5. 46;6. 136;7. 46;8. 136;9. 73;10. S;11. TCG	1. 0.58685;2. 105;3. 313;4. 106;5. 106;6. 316;7. 106;8. 316;9. 253;10. L;11. CTC
ERS451417_02322	1717.62.peg.2349	NA	NA	NA	1	11	Cbelfantii_FRC0043,"Cdiphtheriae_NCTC11397","Cepidermidicanis_DSM45586","Ckutscheri_DSM20755","Cmustelae_DSM45274","Cpseudotuberculosis_31","Cpseudotuberculosis_ATCC19410","Csilvaticum_KL0182","Culcerans_NCTC12077","Culcerans_NCTC7910","Cvitaeruminis_DSM20294"	0.320189	0.279902	2.32371	0.320189	0.279902	2.32371	2050	2	1. 0.64316;2. 122;3. 364;4. 176;5. 124;6. 370;7. 132;8. 394;9. 151;10. V;11. GTG	1. 0.52066;2. 188;3. 562;4. 249;5. 190;6. 568;7. 198;8. 592;9. 349;10. N;11. AAC
ERS451417_00893	1717.62.peg.899	NA	NA	NA	1	23	Catypicum_R2070,"Caurimucosum_ATCC700975","Cbelfantii_FRC0043","Cdiphtheriae_NCTC11397","Cfalsenii_DSM44353","Cglycinophilum_AJ3170","Cimitans_DSM44264","Cjeikeium_K41","Ckroppenstedtii_DSM44385","Ckutscheri_DSM20755","Clactis_RW25","Cpseudotuberculosis_31","Cpseudotuberculosis_ATCC19410","CriegeliiPUDD83A45","Crouxii_FRC0190","Csilvaticum_KL0182","Csimulans_PES1","Csingulare_IBSB52218","Cterpeno…	0.184114	0.184114	1.91418	0.184114	0.184114	1.91418	258	0
ERS451417_00946	1717.62.peg.953	NA	NA	NA	1	39	Cargentoratense_DSM44202,"Catypicum_R2070","Caurimucosum_ATCC700975","Cbelfantii_FRC0043","Ccallunae_DSM20147","Ccamporealensis_DSM44610","Cdeserti_GIMN1010","Cdiphtheriae_NCTC11397","Cdoosanense_DSM45436","Cefficiens_YS314","Cepidermidicanis_DSM45586","Cfalsenii_DSM44353","Cglutamicum_ATCC13032","Cglycinophilum_AJ3170","Chalotolerans_YIM70093","Chumireducens_DSM45392","Cimitans_DSM44264","Cjeike…	0.148584	0.148584	1.83161	0.148584	0.148584	1.83161	258	0
ERS451417_01544	1717.62.peg.1553	NA	NA	NA	1	16	Cbelfantii_FRC0043,"Ccallunae_DSM20147","Cdeserti_GIMN1010","Cdiphtheriae_NCTC11397","Cefficiens_YS314","Cglutamicum_ATCC13032","Chalotolerans_YIM70093","Chumireducens_DSM45392","Cmarinum_DSM44953","Cpseudotuberculosis_31","Cpseudotuberculosis_ATCC19410","Csilvaticum_KL0182","Ctestudinoris_DSM44614","Culcerans_NCTC12077","Culcerans_NCTC7910","Cvitaeruminis_DSM20294"	0.514765	0.34902	1.72149	0.514747	0.34903	1.7215	2	4	1. 0.74553;2. 55;3. 163;4. 66;5. 66;6. 196;7. 66;8. 196;9. 154;10. Q;11. CAG	1. 0.74465;2. 108;3. 322;4. 120;5. 119;6. 355;7. 119;8. 355;9. 313;10. I;11. ATC	1. 0.73067;2. 109;3. 325;4. 121;5. 120;6. 358;7. 120;8. 358;9. 316;10. E;11. GAA	1. 0.44017;2. 111;3. 331;4. 123;5. 122;6. 364;7. 122;8. 364;9. 322;10. S;11. AGT
ERS451417_02293	1717.62.peg.2322	NA	NA	NA	1	30	Cargentoratense_DSM44202,"Catypicum_R2070","Caurimucosum_ATCC700975","Cbelfantii_FRC0043","Ccallunae_DSM20147","Ccamporealensis_DSM44610","Cdeserti_GIMN1010","Cdiphtheriae_NCTC11397","Cefficiens_YS314","Cepidermidicanis_DSM45586","Cfalsenii_DSM44353","Cglutamicum_ATCC13032","Chumireducens_DSM45392","Cimitans_DSM44264","Ckroppenstedtii_DSM44385","Ckutscheri_DSM20755","Clactis_RW25","Cmarinum_DSM44…	0.216675	0.169486	1.72942	0.216675	0.169486	1.72942	2	1	1. 0.62104;2. 15;3. 43;4. 15;5. 15;6. 43;7. 15;8. 43;9. 43;10. V;11. GTC
ERS451417_00966	1717.62.peg.974	NA	NA	NA	1	17	Cargentoratense_DSM44202,"Cbelfantii_FRC0043","Cdiphtheriae_NCTC11397","Cefficiens_YS314","Cepidermidicanis_DSM45586","Cglutamicum_ATCC13032","Ckroppenstedtii_DSM44385","Ckutscheri_DSM20755","Clactis_RW25","Cmustelae_DSM45274","Cpseudotuberculosis_31","Cpseudotuberculosis_ATCC19410","Crouxii_FRC0190","Csilvaticum_KL0182","Culcerans_NCTC12077","Culcerans_NCTC7910","Cvitaeruminis_DSM20294"	0.171036	0.171036	2.51283	0.171036	0.171036	2.51283	258	0
ERS451417_01795	1717.62.peg.1800	NA	NA	NA	1	38	Cargentoratense_DSM44202,"Catypicum_R2070","Caurimucosum_ATCC700975","Cbelfantii_FRC0043","Ccallunae_DSM20147","Ccamporealensis_DSM44610","Cdeserti_GIMN1010","Cdiphtheriae_NCTC11397","Cdoosanense_DSM45436","Cefficiens_YS314","Cepidermidicanis_DSM45586","Cfalsenii_DSM44353","Cglutamicum_ATCC13032","Cglycinophilum_AJ3170","Chalotolerans_YIM70093","Chumireducens_DSM45392","Cimitans_DSM44264","Cjeike…	0.134338	0.134338	1.9841	0.134338	0.134338	1.9841	2306	0
ERS451417_00877	1717.62.peg.883	NA	NA	NA	1	39	Cargentoratense_DSM44202,"Catypicum_R2070","Caurimucosum_ATCC700975","Cbelfantii_FRC0043","Ccallunae_DSM20147","Ccamporealensis_DSM44610","Cdeserti_GIMN1010","Cdiphtheriae_NCTC11397","Cdoosanense_DSM45436","Cefficiens_YS314","Cepidermidicanis_DSM45586","Cfalsenii_DSM44353","Cglutamicum_ATCC13032","Cglycinophilum_AJ3170","Chalotolerans_YIM70093","Chumireducens_DSM45392","Cimitans_DSM44264","Cjeike…	0.159929	0.159929	1.74737	0.201676	0.159758	1.74829	3074	3	1. 0.46206;2. 94;3. 280;4. 119;5. 119;6. 355;7. 151;8. 451;9. 136;10. V;11. GTT	1. 0.58672;2. 300;3. 898;4. 341;5. 341;6. 1021;7. 395;8. 1183;9. 676;10. H;11. CAC	1. 0.63227;2. 350;3. 1048;4. 394;5. 394;6. 1180;7. 449;8. 1345;9. 802;10. T;11. ACT
ERS451417_02175	1717.62.peg.2201	NA	NA	NA	1	7	Cbelfantii_FRC0043,"Cdiphtheriae_NCTC11397","Cpseudotuberculosis_31","Cpseudotuberculosis_ATCC19410","Csilvaticum_KL0182","Culcerans_NCTC12077","Culcerans_NCTC7910"	0.0959092	0.0959092	2.77426	0.0959092	0.0959092	2.77426	2	8	1. 0.83469;2. 41;3. 121;4. 64;5. 48;6. 142;7. 48;8. 142;9. 121;10. A;11. GCG	1. 0.40112;2. 50;3. 148;4. 73;5. 57;6. 169;7. 57;8. 169;9. 148;10. Y;11. TAT	1. 0.42721;2. 91;3. 271;4. 114;5. 98;6. 292;7. 98;8. 292;9. 271;10. A;11. GCG	1. 0.40146;2. 141;3. 421;4. 185;5. 152;6. 454;7. 155;8. 463;9. 349;10. V;11. GTA	1. 0.43065;2. 247;3. 739;4. 298;5. 258;6. 772;7. 261;8. 781;9. 667;10. S;11. TCG	1. 0.45167;2. 325;3. 973;4. 376;5. 336;6. 1006;7. 339;8. 1015;9. 901;10. A;11. GCT	1. 0.85543;2. 460;3. 1378;4. 514;5. 471;6. 1411;7. 474;8. 1420;9. 1306;10. A;11. GCT	1. 0.44104;2. 687;3. 2059;4. 785;5. 716;6. 2146;7. 719;8. 2155;9. 1975;10. I;11. ATC
ERS451417_01232	1717.62.peg.1240	NA	NA	NA	1	15	Cargentoratense_DSM44202,"Cbelfantii_FRC0043","Cdiphtheriae_NCTC11397","Cepidermidicanis_DSM45586","Ckroppenstedtii_DSM44385","Ckutscheri_DSM20755","Clactis_RW25","Cmustelae_DSM45274","Cpseudotuberculosis_31","Cpseudotuberculosis_ATCC19410","Crouxii_FRC0190","Csilvaticum_KL0182","Culcerans_NCTC12077","Culcerans_NCTC7910","Cvitaeruminis_DSM20294"	0.228404	0.226717	2.17429	0.228404	0.226717	2.17429	2	1	1. 0.5935;2. 92;3. 274;4. 110;5. 110;6. 328;7. 118;8. 352;9. 262;10. D;11. GAC
ERS451417_00870	1717.62.peg.875	NA	NA	NA	1	32	Cargentoratense_DSM44202,"Catypicum_R2070","Caurimucosum_ATCC700975","Cbelfantii_FRC0043","Ccallunae_DSM20147","Ccamporealensis_DSM44610","Cdeserti_GIMN1010","Cdiphtheriae_NCTC11397","Cdoosanense_DSM45436","Cefficiens_YS314","Cepidermidicanis_DSM45586","Cglutamicum_ATCC13032","Chalotolerans_YIM70093","Chumireducens_DSM45392","Cimitans_DSM44264","Ckutscheri_DSM20755","Cmarinum_DSM44953","Cmaris_DS…	0.0986036	0.0986036	1.82729	0.0986036	0.0986036	1.82729	2306	0
ERS451417_02283	1717.62.peg.2312	NA	NA	NA	1	38	Cargentoratense_DSM44202,"Catypicum_R2070","Caurimucosum_ATCC700975","Cbelfantii_FRC0043","Ccallunae_DSM20147","Ccamporealensis_DSM44610","Cdeserti_GIMN1010","Cdiphtheriae_NCTC11397","Cdoosanense_DSM45436","Cefficiens_YS314","Cepidermidicanis_DSM45586","Cfalsenii_DSM44353","Cglutamicum_ATCC13032","Cglycinophilum_AJ3170","Chalotolerans_YIM70093","Chumireducens_DSM45392","Cimitans_DSM44264","Cjeike…	0.162373	0.162373	1.34989	0.162373	0.162373	1.34989	258	0
ERS451417_01655	1717.62.peg.1662	NA	NA	NA	1	38	Cargentoratense_DSM44202,"Catypicum_R2070","Caurimucosum_ATCC700975","Cbelfantii_FRC0043","Ccallunae_DSM20147","Ccamporealensis_DSM44610","Cdeserti_GIMN1010","Cdiphtheriae_NCTC11397","Cdoosanense_DSM45436","Cefficiens_YS314","Cepidermidicanis_DSM45586","Cfalsenii_DSM44353","Cglutamicum_ATCC13032","Cglycinophilum_AJ3170","Chalotolerans_YIM70093","Chumireducens_DSM45392","Cimitans_DSM44264","Cjeike…	0.141687	0.141687	1.71533	0.141687	0.141687	1.71533	258	0
ERS451417_00212	1717.62.peg.209	NA	NA	NA	1	11	Cbelfantii_FRC0043,"Cdiphtheriae_NCTC11397","Ckroppenstedtii_DSM44385","Clactis_RW25","Cmustelae_DSM45274","Cpseudotuberculosis_31","Cpseudotuberculosis_ATCC19410","Crouxii_FRC0190","Csilvaticum_KL0182","Culcerans_NCTC12077","Culcerans_NCTC7910"	0.0428012	0.0428012	2.39384	0.042801	0.042801	2.39381	258	0
ERS451417_00817	1717.62.peg.823	NA	NA	NA	1	35	Cargentoratense_DSM44202,"Catypicum_R2070","Caurimucosum_ATCC700975","Cbelfantii_FRC0043","Ccallunae_DSM20147","Ccamporealensis_DSM44610","Cdeserti_GIMN1010","Cdiphtheriae_NCTC11397","Cdoosanense_DSM45436","Cefficiens_YS314","Cepidermidicanis_DSM45586","Cglutamicum_ATCC13032","Chalotolerans_YIM70093","Chumireducens_DSM45392","Cimitans_DSM44264","Ckroppenstedtii_DSM44385","Ckutscheri_DSM20755","Cl…	0.198947	0.198947	1.55075	0.198947	0.198947	1.55076	3330	0
ERS451417_00025	1717.62.peg.22	NA	NA	NA	1	32	Cargentoratense_DSM44202,"Catypicum_R2070","Caurimucosum_ATCC700975","Cbelfantii_FRC0043","Ccallunae_DSM20147","Cdeserti_GIMN1010","Cdiphtheriae_NCTC11397","Cdoosanense_DSM45436","Cefficiens_YS314","Cfalsenii_DSM44353","Cglutamicum_ATCC13032","Cglycinophilum_AJ3170","Chalotolerans_YIM70093","Cjeikeium_K41","Ckroppenstedtii_DSM44385","Ckutscheri_DSM20755","Cmustelae_DSM45274","Cpseudotuberculosis_…	0.191061	0.191061	1.48543	0.191061	0.191061	1.48543	3330	0
ERS451417_00954	1717.62.peg.961	NA	NA	NA	1	39	Cargentoratense_DSM44202,"Catypicum_R2070","Caurimucosum_ATCC700975","Cbelfantii_FRC0043","Ccallunae_DSM20147","Ccamporealensis_DSM44610","Cdeserti_GIMN1010","Cdiphtheriae_NCTC11397","Cdoosanense_DSM45436","Cefficiens_YS314","Cepidermidicanis_DSM45586","Cfalsenii_DSM44353","Cglutamicum_ATCC13032","Cglycinophilum_AJ3170","Chalotolerans_YIM70093","Chumireducens_DSM45392","Cimitans_DSM44264","Cjeike…	0.0837682	0.0837682	1.75909	0.0837682	0.0837682	1.75909	1282	0
ERS451417_01209	1717.62.peg.1217	NA	NA	NA	1	32	Cargentoratense_DSM44202,"Catypicum_R2070","Cbelfantii_FRC0043","Ccallunae_DSM20147","Cdeserti_GIMN1010","Cdiphtheriae_NCTC11397","Cefficiens_YS314","Cepidermidicanis_DSM45586","Cfalsenii_DSM44353","Cglutamicum_ATCC13032","Cglycinophilum_AJ3170","Chalotolerans_YIM70093","Chumireducens_DSM45392","Cimitans_DSM44264","Cjeikeium_K41","Ckroppenstedtii_DSM44385","Ckutscheri_DSM20755","Clactis_RW25","Cm…	0.212171	0.212171	1.50113	0.212171	0.212171	1.50112	3074	1	1. 0.55283;2. 160;3. 478;4. 163;5. 163;6. 487;7. 165;8. 493;9. 445;10. L;11. CTA
ERS451417_01959	1717.62.peg.1959	NA	NA	NA	1	37	Cargentoratense_DSM44202,"Catypicum_R2070","Caurimucosum_ATCC700975","Cbelfantii_FRC0043","Ccallunae_DSM20147","Ccamporealensis_DSM44610","Cdeserti_GIMN1010","Cdiphtheriae_NCTC11397","Cdoosanense_DSM45436","Cefficiens_YS314","Cepidermidicanis_DSM45586","Cfalsenii_DSM44353","Cglutamicum_ATCC13032","Cglycinophilum_AJ3170","Chalotolerans_YIM70093","Chumireducens_DSM45392","Cimitans_DSM44264","Cjeike…	0.102122	0.102122	1.86959	0.102122	0.102122	1.86959	2	1	1. 0.70987;2. 47;3. 139;4. 66;5. 66;6. 196;7. 83;8. 247;9. 106;10. K;11. AAG
ERS451417_01310	1717.62.peg.1318	NA	NA	NA	1	38	Cargentoratense_DSM44202,"Catypicum_R2070","Caurimucosum_ATCC700975","Cbelfantii_FRC0043","Ccallunae_DSM20147","Ccamporealensis_DSM44610","Cdeserti_GIMN1010","Cdiphtheriae_NCTC11397","Cdoosanense_DSM45436","Cefficiens_YS314","Cepidermidicanis_DSM45586","Cfalsenii_DSM44353","Cglutamicum_ATCC13032","Cglycinophilum_AJ3170","Chalotolerans_YIM70093","Chumireducens_DSM45392","Cimitans_DSM44264","Cjeike…	0.159441	0.159431	1.52247	0.159422	0.159422	1.52248	258	0
ERS451417_02277	1717.62.peg.2306	NA	NA	NA	1	36	Cargentoratense_DSM44202,"Catypicum_R2070","Caurimucosum_ATCC700975","Cbelfantii_FRC0043","Ccallunae_DSM20147","Ccamporealensis_DSM44610","Cdeserti_GIMN1010","Cdiphtheriae_NCTC11397","Cdoosanense_DSM45436","Cefficiens_YS314","Cepidermidicanis_DSM45586","Cfalsenii_DSM44353","Cglutamicum_ATCC13032","Cglycinophilum_AJ3170","Chalotolerans_YIM70093","Chumireducens_DSM45392","Cimitans_DSM44264","Cjeike…	0.112626	0.112626	1.89282	0.112626	0.112626	1.89282	258	0
ERS451417_01872	1717.62.peg.1874	NA	NA	NA	1	38	Cargentoratense_DSM44202,"Catypicum_R2070","Caurimucosum_ATCC700975","Cbelfantii_FRC0043","Ccallunae_DSM20147","Ccamporealensis_DSM44610","Cdeserti_GIMN1010","Cdiphtheriae_NCTC11397","Cdoosanense_DSM45436","Cefficiens_YS314","Cepidermidicanis_DSM45586","Cfalsenii_DSM44353","Cglutamicum_ATCC13032","Cglycinophilum_AJ3170","Chalotolerans_YIM70093","Chumireducens_DSM45392","Cimitans_DSM44264","Cjeike…	0.420716	0.0844721	7.37219	0.201539	0.0844821	7.37219	258	0
ERS451417_01826	1717.62.peg.1831	NA	NA	NA	1	14	Cbelfantii_FRC0043,"Ccallunae_DSM20147","Cdeserti_GIMN1010","Cdiphtheriae_NCTC11397","Cdoosanense_DSM45436","Cglutamicum_ATCC13032","Clactis_RW25","Cpseudotuberculosis_31","Cpseudotuberculosis_ATCC19410","Csilvaticum_KL0182","Csimulans_PES1","Culcerans_NCTC12077","Culcerans_NCTC7910","Cuterequi_DSM45634"	0.473641	0.133478	1.61806	0.473641	0.133478	1.61806	3074	1	1. 0.88751;2. 34;3. 100;4. 38;5. 38;6. 112;7. 58;8. 172;9. 52;10. L;11. CTC
ERS451417_01747	1717.62.peg.1750	NA	NA	NA	1	28	Catypicum_R2070,"Caurimucosum_ATCC700975","Cbelfantii_FRC0043","Ccallunae_DSM20147","Ccamporealensis_DSM44610","Cdeserti_GIMN1010","Cdiphtheriae_NCTC11397","Cdoosanense_DSM45436","Cefficiens_YS314","Cepidermidicanis_DSM45586","Cglutamicum_ATCC13032","Chalotolerans_YIM70093","Chumireducens_DSM45392","Cimitans_DSM44264","Ckutscheri_DSM20755","Cmarinum_DSM44953","Cmaris_DSM45190","Cmustelae_DSM45274…	0.281759	0.281759	1.81549	0.281759	0.281759	1.81549	7170	1	1. 0.45256;2. 116;3. 346;4. 130;5. 120;6. 358;7. 131;8. 391;9. 268;10. I;11. ATT
ERS451417_01665	1717.62.peg.1672	NA	NA	NA	1	38	Cargentoratense_DSM44202,"Catypicum_R2070","Caurimucosum_ATCC700975","Cbelfantii_FRC0043","Ccallunae_DSM20147","Ccamporealensis_DSM44610","Cdeserti_GIMN1010","Cdiphtheriae_NCTC11397","Cdoosanense_DSM45436","Cefficiens_YS314","Cepidermidicanis_DSM45586","Cfalsenii_DSM44353","Cglutamicum_ATCC13032","Cglycinophilum_AJ3170","Chalotolerans_YIM70093","Chumireducens_DSM45392","Cimitans_DSM44264","Cjeike…	0.106786	0.106786	1.8165	0.106786	0.106786	1.8165	258	0
ERS451417_01376	1717.62.peg.1385	NA	NA	NA	1	38	Cargentoratense_DSM44202,"Catypicum_R2070","Caurimucosum_ATCC700975","Cbelfantii_FRC0043","Ccallunae_DSM20147","Ccamporealensis_DSM44610","Cdeserti_GIMN1010","Cdiphtheriae_NCTC11397","Cdoosanense_DSM45436","Cefficiens_YS314","Cepidermidicanis_DSM45586","Cfalsenii_DSM44353","Cglutamicum_ATCC13032","Cglycinophilum_AJ3170","Chalotolerans_YIM70093","Chumireducens_DSM45392","Cimitans_DSM44264","Cjeike…	0.179437	0.179437	1.57768	0.179437	0.179437	1.57768	2	1	1. 0.50013;2. 119;3. 355;4. 136;5. 136;6. 406;7. 136;8. 406;9. 355;10. S;11. AGC
ERS451417_01640	1717.62.peg.1647	NA	NA	NA	1	38	Cargentoratense_DSM44202,"Catypicum_R2070","Caurimucosum_ATCC700975","Cbelfantii_FRC0043","Ccallunae_DSM20147","Ccamporealensis_DSM44610","Cdeserti_GIMN1010","Cdiphtheriae_NCTC11397","Cdoosanense_DSM45436","Cefficiens_YS314","Cepidermidicanis_DSM45586","Cfalsenii_DSM44353","Cglutamicum_ATCC13032","Cglycinophilum_AJ3170","Chalotolerans_YIM70093","Chumireducens_DSM45392","Cimitans_DSM44264","Cjeike…	0.119462	0.119462	1.75246	0.119462	0.119462	1.75247	258	0
ERS451417_01464	1717.62.peg.1474	NA	NA	NA	1	9	Cbelfantii_FRC0043,"Cdiphtheriae_NCTC11397","Ckutscheri_DSM20755","Cmustelae_DSM45274","Cpseudotuberculosis_31","Cpseudotuberculosis_ATCC19410","Csilvaticum_KL0182","Culcerans_NCTC12077","Culcerans_NCTC7910"	0.335809	0.109316	2.10805	0.335819	0.109316	2.10805	2	1	1. 0.80039;2. 60;3. 178;4. 79;5. 64;6. 190;7. 65;8. 193;9. 160;10. I;11. ATT
ERS451417_00804	1717.62.peg.811	NA	NA	NA	1	39	Cargentoratense_DSM44202,"Catypicum_R2070","Caurimucosum_ATCC700975","Cbelfantii_FRC0043","Ccallunae_DSM20147","Ccamporealensis_DSM44610","Cdeserti_GIMN1010","Cdiphtheriae_NCTC11397","Cdoosanense_DSM45436","Cefficiens_YS314","Cepidermidicanis_DSM45586","Cfalsenii_DSM44353","Cglutamicum_ATCC13032","Cglycinophilum_AJ3170","Chalotolerans_YIM70093","Chumireducens_DSM45392","Cimitans_DSM44264","Cjeike…	0.216848	0.204212	1.78123	0.216848	0.204212	1.78122	3074	3	1. 0.56386;2. 249;3. 745;4. 280;5. 280;6. 838;7. 363;8. 1087;9. 433;10. I;11. ATC	1. 0.5086;2. 252;3. 754;4. 283;5. 283;6. 847;7. 366;8. 1096;9. 442;10. Q;11. CAG	1. 0.50966;2. 265;3. 793;4. 296;5. 296;6. 886;7. 379;8. 1135;9. 481;10. I;11. ATC
ERS451417_01723	1717.62.peg.1726	NA	NA	NA	1	38	Cargentoratense_DSM44202,"Catypicum_R2070","Caurimucosum_ATCC700975","Cbelfantii_FRC0043","Ccallunae_DSM20147","Ccamporealensis_DSM44610","Cdeserti_GIMN1010","Cdiphtheriae_NCTC11397","Cdoosanense_DSM45436","Cefficiens_YS314","Cepidermidicanis_DSM45586","Cfalsenii_DSM44353","Cglutamicum_ATCC13032","Cglycinophilum_AJ3170","Chalotolerans_YIM70093","Chumireducens_DSM45392","Cimitans_DSM44264","Cjeike…	0.127942	0.127942	1.83807	0.127942	0.127942	1.83807	2	2	1. 0.53384;2. 233;3. 697;4. 256;5. 256;6. 766;7. 269;8. 805;9. 640;10. D;11. GAT	1. 0.57243;2. 385;3. 1153;4. 408;5. 408;6. 1222;7. 421;8. 1261;9. 1096;10. E;11. GAA
ERS451417_00301	1717.62.peg.302	NA	NA	NA	1	8	Cbelfantii_FRC0043,"Cdiphtheriae_NCTC11397","Cpseudotuberculosis_31","Cpseudotuberculosis_ATCC19410","Crouxii_FRC0190","Csilvaticum_KL0182","Culcerans_NCTC12077","Culcerans_NCTC7910"	0.199758	0.130905	2.61956	0.199758	0.130905	2.61956	2	4	1. 0.45524;2. 64;3. 190;4. 170;5. 69;6. 205;7. 71;8. 211;9. 172;10. A;11. GCC	1. 0.52728;2. 72;3. 214;4. 178;5. 77;6. 229;7. 79;8. 235;9. 196;10. T;11. ACC	1. 0.45204;2. 128;3. 382;4. 253;5. 148;6. 442;7. 150;8. 448;9. 361;10. A;11. GCC	1. 0.41609;2. 206;3. 616;4. 343;5. 233;6. 697;7. 235;8. 703;9. 574;10. Q;11. CAG
ERS451417_01042	1717.62.peg.1052	NA	NA	NA	1	39	Cargentoratense_DSM44202,"Catypicum_R2070","Caurimucosum_ATCC700975","Cbelfantii_FRC0043","Ccallunae_DSM20147","Ccamporealensis_DSM44610","Cdeserti_GIMN1010","Cdiphtheriae_NCTC11397","Cdoosanense_DSM45436","Cefficiens_YS314","Cepidermidicanis_DSM45586","Cfalsenii_DSM44353","Cglutamicum_ATCC13032","Cglycinophilum_AJ3170","Chalotolerans_YIM70093","Chumireducens_DSM45392","Cimitans_DSM44264","Cjeike…	0.130637	0.130637	1.91179	0.130637	0.130637	1.91179	2	1	1. 0.65979;2. 252;3. 754;4. 278;5. 278;6. 832;7. 344;8. 1030;9. 712;10. T;11. ACC
ERS451417_01441	1717.62.peg.1448	NA	NA	NA	1	28	Cargentoratense_DSM44202,"Caurimucosum_ATCC700975","Cbelfantii_FRC0043","Cdiphtheriae_NCTC11397","Cepidermidicanis_DSM45586","Cglycinophilum_AJ3170","Chalotolerans_YIM70093","Chumireducens_DSM45392","Cimitans_DSM44264","Ckroppenstedtii_DSM44385","Ckutscheri_DSM20755","Clactis_RW25","Cmarinum_DSM44953","Cmaris_DSM45190","Cmustelae_DSM45274","Cpseudotuberculosis_31","Cpseudotuberculosis_ATCC19410",…	0.213237	0.213237	1.58226	0.213246	0.213246	1.58226	258	0
ERS451417_00986	1717.62.peg.997	NA	NA	NA	1	39	Cargentoratense_DSM44202,"Catypicum_R2070","Caurimucosum_ATCC700975","Cbelfantii_FRC0043","Ccallunae_DSM20147","Ccamporealensis_DSM44610","Cdeserti_GIMN1010","Cdiphtheriae_NCTC11397","Cdoosanense_DSM45436","Cefficiens_YS314","Cepidermidicanis_DSM45586","Cfalsenii_DSM44353","Cglutamicum_ATCC13032","Cglycinophilum_AJ3170","Chalotolerans_YIM70093","Chumireducens_DSM45392","Cimitans_DSM44264","Cjeike…	0.182682	0.182682	1.64046	0.182682	0.182682	1.64048	1026	2	1. 0.48048;2. 231;3. 691;4. 293;5. 293;6. 877;7. 515;8. 1543;9. 553;10. E;11. GAA	1. 0.4851;2. 572;3. 1714;4. 662;5. 662;6. 1984;7. 888;8. 2662;9. 1549;10. V;11. GTG
ERS451417_02069	1717.62.peg.2081	NA	NA	NA	1	21	Cbelfantii_FRC0043,"Ccallunae_DSM20147","Cdiphtheriae_NCTC11397","Cdoosanense_DSM45436","Cglutamicum_ATCC13032","Chalotolerans_YIM70093","Cimitans_DSM44264","Ckutscheri_DSM20755","Cmarinum_DSM44953","Cmaris_DSM45190","Cpseudotuberculosis_31","Cpseudotuberculosis_ATCC19410","CriegeliiPUDD83A45","Csilvaticum_KL0182","Csimulans_PES1","Ctestudinoris_DSM44614","Culcerans_NCTC12077","Culcerans_NCTC7910…	0.0828874	0.0828874	1.43245	0.0828874	0.0828874	1.43245	2	1	1. 0.42164;2. 193;3. 577;4. 221;5. 221;6. 661;7. 244;8. 730;9. 478;10. R;11. CGC
ERS451417_00782	1717.62.peg.789	NA	NA	NA	1	39	Cargentoratense_DSM44202,"Catypicum_R2070","Caurimucosum_ATCC700975","Cbelfantii_FRC0043","Ccallunae_DSM20147","Ccamporealensis_DSM44610","Cdeserti_GIMN1010","Cdiphtheriae_NCTC11397","Cdoosanense_DSM45436","Cefficiens_YS314","Cepidermidicanis_DSM45586","Cfalsenii_DSM44353","Cglutamicum_ATCC13032","Cglycinophilum_AJ3170","Chalotolerans_YIM70093","Chumireducens_DSM45392","Cimitans_DSM44264","Cjeike…	0.124443	0.124443	1.80057	0.124443	0.124443	1.80057	1282	0
ERS451417_01720	1717.62.peg.1723	NA	NA	NA	1	20	Caurimucosum_ATCC700975,"Cbelfantii_FRC0043","Ccallunae_DSM20147","Cdeserti_GIMN1010","Cdiphtheriae_NCTC11397","Cdoosanense_DSM45436","Cefficiens_YS314","Cepidermidicanis_DSM45586","Cglutamicum_ATCC13032","Chalotolerans_YIM70093","Chumireducens_DSM45392","Cmarinum_DSM44953","Cpseudotuberculosis_31","Cpseudotuberculosis_ATCC19410","Csilvaticum_KL0182","Csingulare_IBSB52218","Ctestudinoris_DSM44614…	0.247717	0.247717	1.57881	0.247717	0.247717	1.57881	3074	1	1. 0.43527;2. 362;3. 1084;4. 432;5. 408;6. 1222;7. 514;8. 1540;9. 682;10. L;11. CTG
ERS451417_00200	1717.62.peg.197	NA	NA	NA	1	39	Cargentoratense_DSM44202,"Catypicum_R2070","Caurimucosum_ATCC700975","Cbelfantii_FRC0043","Ccallunae_DSM20147","Ccamporealensis_DSM44610","Cdeserti_GIMN1010","Cdiphtheriae_NCTC11397","Cdoosanense_DSM45436","Cefficiens_YS314","Cepidermidicanis_DSM45586","Cfalsenii_DSM44353","Cglutamicum_ATCC13032","Cglycinophilum_AJ3170","Chalotolerans_YIM70093","Chumireducens_DSM45392","Cimitans_DSM44264","Cjeike…	0.203429	0.194203	2.03249	0.203429	0.194203	2.03249	2	1	1. 0.63459;2. 214;3. 640;4. 232;5. 232;6. 694;7. 268;8. 802;9. 547;10. N;11. AAC
ERS451417_00187	1717.62.peg.183	NA	NA	NA	1	10	Cbelfantii_FRC0043,"Cdiphtheriae_NCTC11397","Cepidermidicanis_DSM45586","Cimitans_DSM44264","Cjeikeium_K41","Cmaris_DSM45190","Crouxii_FRC0190","Csilvaticum_KL0182","Culcerans_NCTC12077","Culcerans_NCTC7910"	0.142907	0.142907	2.22377	0.142907	0.142907	2.22377	2306	0
ERS451417_00136	1717.62.peg.135	NA	NA	NA	1	12	Cbelfantii_FRC0043,"Cdiphtheriae_NCTC11397","Chumireducens_DSM45392","Cmaris_DSM45190","Cmustelae_DSM45274","Cpseudotuberculosis_31","Cpseudotuberculosis_ATCC19410","Crouxii_FRC0190","Culcerans_NCTC12077","Culcerans_NCTC7910","Cuterequi_DSM45634","Cvitaeruminis_DSM20294"	0.12105	0.12105	2.12568	0.12105	0.12105	2.12568	6146	1	1. 0.40475;2. 110;3. 328;4. 125;5. 112;6. 334;7. 117;8. 349;9. 217;10. V;11. GTG
ERS451417_00304	1717.62.peg.305	NA	NA	NA	1	22	Catypicum_R2070,"Caurimucosum_ATCC700975","Cbelfantii_FRC0043","Ccamporealensis_DSM44610","Cdiphtheriae_NCTC11397","Cepidermidicanis_DSM45586","Chumireducens_DSM45392","Cimitans_DSM44264","Cmarinum_DSM44953","Cmustelae_DSM45274","Cpseudotuberculosis_31","Cpseudotuberculosis_ATCC19410","CriegeliiPUDD83A45","Crouxii_FRC0190","Csilvaticum_KL0182","Csimulans_PES1","Csingulare_IBSB52218","Ctestudinori…	0.115778	0.115778	1.98664	0.115778	0.115778	1.98664	2	1	1. 0.54768;2. 289;3. 865;4. 291;5. 291;6. 871;7. 299;8. 895;9. 616;10. F;11. TTC
ERS451417_02309	1717.62.peg.2336	NA	NA	NA	1	31	Catypicum_R2070,"Caurimucosum_ATCC700975","Cbelfantii_FRC0043","Ccallunae_DSM20147","Ccamporealensis_DSM44610","Cdeserti_GIMN1010","Cdiphtheriae_NCTC11397","Cdoosanense_DSM45436","Cefficiens_YS314","Cepidermidicanis_DSM45586","Cglutamicum_ATCC13032","Cglycinophilum_AJ3170","Chalotolerans_YIM70093","Chumireducens_DSM45392","Ckutscheri_DSM20755","Cmarinum_DSM44953","Cmaris_DSM45190","Cmustelae_DSM4…	0.471882	0.471882	1.65752	0.471882	0.471882	1.65752	2306	0
ERS451417_01947	1717.62.peg.1947	NA	NA	NA	1	19	Cbelfantii_FRC0043,"Ccallunae_DSM20147","Cdeserti_GIMN1010","Cdiphtheriae_NCTC11397","Cefficiens_YS314","Cepidermidicanis_DSM45586","Cglutamicum_ATCC13032","Chalotolerans_YIM70093","Ckroppenstedtii_DSM44385","Clactis_RW25","Cmarinum_DSM44953","Cmaris_DSM45190","Cmustelae_DSM45274","Cpseudotuberculosis_31","Cpseudotuberculosis_ATCC19410","Ctestudinoris_DSM44614","Culcerans_NCTC12077","Culcerans_NC…	0.197123	0.197123	1.48271	0.197123	0.197123	1.48271	4354	0
ERS451417_01585	1717.62.peg.1594	NA	NA	NA	1	6	Cdiphtheriae_NCTC11397,"Cpseudotuberculosis_31","Cpseudotuberculosis_ATCC19410","Culcerans_NCTC12077","Culcerans_NCTC7910","Cvitaeruminis_DSM20294"	0.0701	0.0701	3.13463	0.0701	0.0701	3.13463	6402	0
ERS451417_02320	1717.62.peg.2347	NA	NA	NA	1	28	Cargentoratense_DSM44202,"Catypicum_R2070","Cbelfantii_FRC0043","Ccallunae_DSM20147","Cdeserti_GIMN1010","Cdiphtheriae_NCTC11397","Cdoosanense_DSM45436","Cefficiens_YS314","Cepidermidicanis_DSM45586","Cglutamicum_ATCC13032","Chalotolerans_YIM70093","Chumireducens_DSM45392","Cimitans_DSM44264","Cjeikeium_K41","Ckutscheri_DSM20755","Cmarinum_DSM44953","Cmaris_DSM45190","Cmustelae_DSM45274","Cpseudo…	0.159544	0.159544	1.64561	0.159544	0.159544	1.64561	1026	1	1. 0.43385;2. 25;3. 73;4. 56;5. 53;6. 157;7. 63;8. 187;9. 70;10. L;11. CTA
ERS451417_02398	1717.62.peg.2430	NA	NA	NA	1	38	Cargentoratense_DSM44202,"Catypicum_R2070","Caurimucosum_ATCC700975","Cbelfantii_FRC0043","Ccallunae_DSM20147","Ccamporealensis_DSM44610","Cdeserti_GIMN1010","Cdiphtheriae_NCTC11397","Cdoosanense_DSM45436","Cefficiens_YS314","Cepidermidicanis_DSM45586","Cfalsenii_DSM44353","Cglutamicum_ATCC13032","Cglycinophilum_AJ3170","Chalotolerans_YIM70093","Chumireducens_DSM45392","Cimitans_DSM44264","Cjeike…	0.202853	0.202853	1.62287	0.202853	0.202853	1.62287	2	3	1. 0.55292;2. 106;3. 316;4. 127;5. 127;6. 379;7. 201;8. 601;9. 157;10. V;11. GTT	1. 0.49009;2. 139;3. 415;4. 160;5. 160;6. 478;7. 234;8. 700;9. 256;10. L;11. CTC	1. 0.48314;2. 253;3. 757;4. 274;5. 274;6. 820;7. 348;8. 1042;9. 598;10. D;11. GAC
ERS451417_01458	1717.62.peg.1468	NA	NA	NA	1	35	Cargentoratense_DSM44202,"Catypicum_R2070","Caurimucosum_ATCC700975","Cbelfantii_FRC0043","Ccallunae_DSM20147","Ccamporealensis_DSM44610","Cdeserti_GIMN1010","Cdiphtheriae_NCTC11397","Cdoosanense_DSM45436","Cefficiens_YS314","Cepidermidicanis_DSM45586","Cglutamicum_ATCC13032","Cglycinophilum_AJ3170","Chalotolerans_YIM70093","Chumireducens_DSM45392","Cimitans_DSM44264","Ckroppenstedtii_DSM44385","…	0.0551294	0.0551294	1.25269	0.0551294	0.0551294	1.25269	258	0
ERS451417_00854	1717.62.peg.859	NA	NA	NA	1	18	Ccallunae_DSM20147,"Cdeserti_GIMN1010","Cdiphtheriae_NCTC11397","Cefficiens_YS314","Cglutamicum_ATCC13032","Chalotolerans_YIM70093","Chumireducens_DSM45392","Clactis_RW25","Cmarinum_DSM44953","Cmaris_DSM45190","Cmustelae_DSM45274","Cpseudotuberculosis_31","Cpseudotuberculosis_ATCC19410","Crouxii_FRC0190","Ctestudinoris_DSM44614","Culcerans_NCTC12077","Culcerans_NCTC7910","Cvitaeruminis_DSM20294"	0.257071	0.257071	1.65811	0.257071	0.257071	1.65811	6146	1	1. 0.49565;2. 255;3. 763;4. 304;5. 273;6. 817;7. 271;8. 811;9. 532;10. L;11. CTA
ERS451417_01159	1717.62.peg.1170	NA	NA	NA	1	39	Cargentoratense_DSM44202,"Catypicum_R2070","Caurimucosum_ATCC700975","Cbelfantii_FRC0043","Ccallunae_DSM20147","Ccamporealensis_DSM44610","Cdeserti_GIMN1010","Cdiphtheriae_NCTC11397","Cdoosanense_DSM45436","Cefficiens_YS314","Cepidermidicanis_DSM45586","Cfalsenii_DSM44353","Cglutamicum_ATCC13032","Cglycinophilum_AJ3170","Chalotolerans_YIM70093","Chumireducens_DSM45392","Cimitans_DSM44264","Cjeike…	0.219125	0.219125	1.74687	0.219125	0.219125	1.74687	2	2	1. 0.53007;2. 83;3. 247;4. 88;5. 88;6. 262;7. 97;8. 289;9. 217;10. E;11. GAG	1. 0.63683;2. 342;3. 1024;4. 357;5. 357;6. 1069;7. 433;8. 1297;9. 829;10. T;11. ACT
ERS451417_00882	1717.62.peg.888	NA	NA	NA	1	36	Cargentoratense_DSM44202,"Catypicum_R2070","Caurimucosum_ATCC700975","Cbelfantii_FRC0043","Ccallunae_DSM20147","Ccamporealensis_DSM44610","Cdeserti_GIMN1010","Cdiphtheriae_NCTC11397","Cdoosanense_DSM45436","Cefficiens_YS314","Cfalsenii_DSM44353","Cglutamicum_ATCC13032","Cglycinophilum_AJ3170","Chalotolerans_YIM70093","Chumireducens_DSM45392","Cimitans_DSM44264","Cjeikeium_K41","Ckroppenstedtii_DS…	0.147577	0.147577	2.08102	0.147577	0.147577	2.08102	3330	0
ERS451417_00294	1717.62.peg.295	NA	NA	NA	1	39	Cargentoratense_DSM44202,"Catypicum_R2070","Caurimucosum_ATCC700975","Cbelfantii_FRC0043","Ccallunae_DSM20147","Ccamporealensis_DSM44610","Cdeserti_GIMN1010","Cdiphtheriae_NCTC11397","Cdoosanense_DSM45436","Cefficiens_YS314","Cepidermidicanis_DSM45586","Cfalsenii_DSM44353","Cglutamicum_ATCC13032","Cglycinophilum_AJ3170","Chalotolerans_YIM70093","Chumireducens_DSM45392","Cimitans_DSM44264","Cjeike…	0.13933	0.13933	1.67232	0.13933	0.13933	1.67231	2	1	1. 0.44234;2. 223;3. 667;4. 281;5. 281;6. 841;7. 323;8. 967;9. 604;10. L;11. CTC
ERS451417_01308	1717.62.peg.1316	NA	NA	NA	1	38	Cargentoratense_DSM44202,"Catypicum_R2070","Caurimucosum_ATCC700975","Cbelfantii_FRC0043","Ccallunae_DSM20147","Ccamporealensis_DSM44610","Cdeserti_GIMN1010","Cdiphtheriae_NCTC11397","Cdoosanense_DSM45436","Cefficiens_YS314","Cepidermidicanis_DSM45586","Cfalsenii_DSM44353","Cglutamicum_ATCC13032","Cglycinophilum_AJ3170","Chalotolerans_YIM70093","Chumireducens_DSM45392","Cimitans_DSM44264","Cjeike…	0.148969	0.148969	1.59059	0.148969	0.148969	1.5906	2	1	1. 0.48338;2. 211;3. 631;4. 224;5. 224;6. 670;7. 237;8. 709;9. 607;10. L;11. CTT
ERS451417_00796	1717.62.peg.802	NA	NA	NA	1	39	Cargentoratense_DSM44202,"Catypicum_R2070","Caurimucosum_ATCC700975","Cbelfantii_FRC0043","Ccallunae_DSM20147","Ccamporealensis_DSM44610","Cdeserti_GIMN1010","Cdiphtheriae_NCTC11397","Cdoosanense_DSM45436","Cefficiens_YS314","Cepidermidicanis_DSM45586","Cfalsenii_DSM44353","Cglutamicum_ATCC13032","Cglycinophilum_AJ3170","Chalotolerans_YIM70093","Chumireducens_DSM45392","Cimitans_DSM44264","Cjeike…	0.0981814	0.0981814	1.96438	0.0981722	0.0981722	1.96438	258	0
ERS451417_00729	1717.62.peg.732	NA	NA	NA	1	15	Cargentoratense_DSM44202,"Cbelfantii_FRC0043","Cdiphtheriae_NCTC11397","Cepidermidicanis_DSM45586","Ckroppenstedtii_DSM44385","Ckutscheri_DSM20755","Clactis_RW25","Cmustelae_DSM45274","Cpseudotuberculosis_31","Cpseudotuberculosis_ATCC19410","Crouxii_FRC0190","Csilvaticum_KL0182","Culcerans_NCTC12077","Culcerans_NCTC7910","Cvitaeruminis_DSM20294"	0.259341	0.161602	2.45826	0.259341	0.161602	2.45826	3074	1	1. 0.68195;2. 123;3. 367;4. 161;5. 161;6. 481;7. 161;8. 481;9. 304;10. E;11. GAG
ERS451417_00371	1717.62.peg.370	NA	NA	NA	1	39	Cargentoratense_DSM44202,"Catypicum_R2070","Caurimucosum_ATCC700975","Cbelfantii_FRC0043","Ccallunae_DSM20147","Ccamporealensis_DSM44610","Cdeserti_GIMN1010","Cdiphtheriae_NCTC11397","Cdoosanense_DSM45436","Cefficiens_YS314","Cepidermidicanis_DSM45586","Cfalsenii_DSM44353","Cglutamicum_ATCC13032","Cglycinophilum_AJ3170","Chalotolerans_YIM70093","Chumireducens_DSM45392","Cimitans_DSM44264","Cjeike…	0.106818	0.106818	1.86334	0.106818	0.106818	1.86334	2050	1	1. 0.64842;2. 973;3. 2917;4. 1007;5. 1007;6. 3019;7. 1071;8. 3211;9. 2062;10. V;11. GTC
ERS451417_01148	1717.62.peg.1159	NA	NA	NA	1	38	Cargentoratense_DSM44202,"Catypicum_R2070","Caurimucosum_ATCC700975","Cbelfantii_FRC0043","Ccallunae_DSM20147","Ccamporealensis_DSM44610","Cdeserti_GIMN1010","Cdiphtheriae_NCTC11397","Cdoosanense_DSM45436","Cefficiens_YS314","Cepidermidicanis_DSM45586","Cfalsenii_DSM44353","Cglutamicum_ATCC13032","Cglycinophilum_AJ3170","Chalotolerans_YIM70093","Chumireducens_DSM45392","Cimitans_DSM44264","Ckropp…	0.161326	0.161326	1.67542	0.161326	0.161326	1.67542	258	0
ERS451417_00959	1717.62.peg.966	NA	NA	NA	1	39	Cargentoratense_DSM44202,"Catypicum_R2070","Caurimucosum_ATCC700975","Cbelfantii_FRC0043","Ccallunae_DSM20147","Ccamporealensis_DSM44610","Cdeserti_GIMN1010","Cdiphtheriae_NCTC11397","Cdoosanense_DSM45436","Cefficiens_YS314","Cepidermidicanis_DSM45586","Cfalsenii_DSM44353","Cglutamicum_ATCC13032","Cglycinophilum_AJ3170","Chalotolerans_YIM70093","Chumireducens_DSM45392","Cimitans_DSM44264","Cjeike…	0.318538	0.318538	1.71846	0.318538	0.318538	1.71846	258	0
ERS451417_00801	1717.62.peg.808	NA	NA	NA	1	37	Cargentoratense_DSM44202,"Catypicum_R2070","Caurimucosum_ATCC700975","Cbelfantii_FRC0043","Ccallunae_DSM20147","Ccamporealensis_DSM44610","Cdeserti_GIMN1010","Cdiphtheriae_NCTC11397","Cdoosanense_DSM45436","Cepidermidicanis_DSM45586","Cfalsenii_DSM44353","Cglutamicum_ATCC13032","Cglycinophilum_AJ3170","Chalotolerans_YIM70093","Chumireducens_DSM45392","Cimitans_DSM44264","Cjeikeium_K41","Ckroppens…	0.354584	0.354584	1.56269	0.354584	0.354584	1.56269	1282	0
ERS451417_00010	1717.62.peg.11	NA	NA	NA	1	27	Catypicum_R2070,"Caurimucosum_ATCC700975","Cbelfantii_FRC0043","Ccallunae_DSM20147","Ccamporealensis_DSM44610","Cdeserti_GIMN1010","Cdiphtheriae_NCTC11397","Cdoosanense_DSM45436","Cefficiens_YS314","Cepidermidicanis_DSM45586","Cglutamicum_ATCC13032","Chalotolerans_YIM70093","Chumireducens_DSM45392","Ckutscheri_DSM20755","Cmarinum_DSM44953","Cmaris_DSM45190","Cmustelae_DSM45274","Cpseudotuberculos…	0.160567	0.160567	1.96705	0.160567	0.160567	1.96705	258	0
ERS451417_01317	1717.62.peg.1325	NA	NA	NA	1	36	Catypicum_R2070,"Caurimucosum_ATCC700975","Cbelfantii_FRC0043","Ccallunae_DSM20147","Ccamporealensis_DSM44610","Cdeserti_GIMN1010","Cdiphtheriae_NCTC11397","Cdoosanense_DSM45436","Cefficiens_YS314","Cepidermidicanis_DSM45586","Cfalsenii_DSM44353","Cglutamicum_ATCC13032","Cglycinophilum_AJ3170","Chalotolerans_YIM70093","Chumireducens_DSM45392","Cimitans_DSM44264","Cjeikeium_K41","Ckroppenstedtii_D…	0.233101	0.233101	1.85645	0.233101	0.233101	1.85645	1026	1	1. 0.46812;2. 139;3. 415;4. 148;5. 148;6. 442;7. 232;8. 694;9. 304;10. A;11. GCC
ERS451417_00942	1717.62.peg.949	NA	NA	NA	1	30	Cargentoratense_DSM44202,"Catypicum_R2070","Caurimucosum_ATCC700975","Cbelfantii_FRC0043","Ccamporealensis_DSM44610","Cdiphtheriae_NCTC11397","Cdoosanense_DSM45436","Cepidermidicanis_DSM45586","Cglycinophilum_AJ3170","Chalotolerans_YIM70093","Chumireducens_DSM45392","Cimitans_DSM44264","Ckroppenstedtii_DSM44385","Ckutscheri_DSM20755","Clactis_RW25","Cmarinum_DSM44953","Cmustelae_DSM45274","Cpseud…	0.122431	0.122431	1.76125	0.122431	0.122431	1.76125	258	0
ERS451417_02397	1717.62.peg.2429	NA	NA	NA	1	38	Cargentoratense_DSM44202,"Catypicum_R2070","Caurimucosum_ATCC700975","Cbelfantii_FRC0043","Ccallunae_DSM20147","Ccamporealensis_DSM44610","Cdeserti_GIMN1010","Cdiphtheriae_NCTC11397","Cdoosanense_DSM45436","Cefficiens_YS314","Cepidermidicanis_DSM45586","Cfalsenii_DSM44353","Cglutamicum_ATCC13032","Cglycinophilum_AJ3170","Chalotolerans_YIM70093","Chumireducens_DSM45392","Cimitans_DSM44264","Cjeike…	0.0456122	0.0456122	1.49258	0.045622	0.045622	1.49257	258	0
ERS451417_00750	1717.62.peg.755	NA	NA	NA	1	22	Cargentoratense_DSM44202,"Cbelfantii_FRC0043","Ccallunae_DSM20147","Cdeserti_GIMN1010","Cdiphtheriae_NCTC11397","Cefficiens_YS314","Cepidermidicanis_DSM45586","Cglutamicum_ATCC13032","Chalotolerans_YIM70093","Chumireducens_DSM45392","Ckroppenstedtii_DSM44385","Ckutscheri_DSM20755","Clactis_RW25","Cmarinum_DSM44953","Cmustelae_DSM45274","Cpseudotuberculosis_31","Cpseudotuberculosis_ATCC19410","Cro…	0.194273	0.194273	1.70844	0.194273	0.194273	1.70844	258	0
ERS451417_01152	1717.62.peg.1163	NA	NA	NA	1	39	Cargentoratense_DSM44202,"Catypicum_R2070","Caurimucosum_ATCC700975","Cbelfantii_FRC0043","Ccallunae_DSM20147","Ccamporealensis_DSM44610","Cdeserti_GIMN1010","Cdiphtheriae_NCTC11397","Cdoosanense_DSM45436","Cefficiens_YS314","Cepidermidicanis_DSM45586","Cfalsenii_DSM44353","Cglutamicum_ATCC13032","Cglycinophilum_AJ3170","Chalotolerans_YIM70093","Chumireducens_DSM45392","Cimitans_DSM44264","Cjeike…	0.113391	0.113391	1.56979	0.113391	0.113391	1.56979	258	0
ERS451417_00446	1717.62.peg.449	NA	NA	NA	1	19	Caurimucosum_ATCC700975,"Cbelfantii_FRC0043","Ccallunae_DSM20147","Ccamporealensis_DSM44610","Cdeserti_GIMN1010","Cdiphtheriae_NCTC11397","Cepidermidicanis_DSM45586","Cglutamicum_ATCC13032","Ckroppenstedtii_DSM44385","Ckutscheri_DSM20755","Cmustelae_DSM45274","Cpseudotuberculosis_31","Cpseudotuberculosis_ATCC19410","Crouxii_FRC0190","Csilvaticum_KL0182","Ctestudinoris_DSM44614","Culcerans_NCTC120…	0.237266	0.237266	2.05422	0.237266	0.237266	2.05422	2306	0
ERS451417_01894	1717.62.peg.1893	NA	NA	NA	1	38	Cargentoratense_DSM44202,"Catypicum_R2070","Caurimucosum_ATCC700975","Cbelfantii_FRC0043","Ccallunae_DSM20147","Ccamporealensis_DSM44610","Cdeserti_GIMN1010","Cdiphtheriae_NCTC11397","Cdoosanense_DSM45436","Cefficiens_YS314","Cepidermidicanis_DSM45586","Cfalsenii_DSM44353","Cglutamicum_ATCC13032","Cglycinophilum_AJ3170","Chalotolerans_YIM70093","Chumireducens_DSM45392","Cimitans_DSM44264","Cjeike…	0.159625	0.159625	1.94092	0.159625	0.159625	1.94092	2	1	1. 0.51167;2. 63;3. 187;4. 74;5. 74;6. 220;7. 86;8. 256;9. 166;10. K;11. AAG
ERS451417_00174	1717.62.peg.172	NA	NA	NA	1	7	Cdiphtheriae_NCTC11397,"Ckutscheri_DSM20755","Cpseudotuberculosis_31","Cpseudotuberculosis_ATCC19410","Csilvaticum_KL0182","Culcerans_NCTC12077","Culcerans_NCTC7910"	0.163705	0.163705	2.89685	0.163705	0.163705	2.89685	258	0
ERS451417_02265	1717.62.peg.2294	NA	NA	NA	1	36	Cargentoratense_DSM44202,"Catypicum_R2070","Caurimucosum_ATCC700975","Cbelfantii_FRC0043","Ccallunae_DSM20147","Ccamporealensis_DSM44610","Cdeserti_GIMN1010","Cdiphtheriae_NCTC11397","Cdoosanense_DSM45436","Cefficiens_YS314","Cepidermidicanis_DSM45586","Cfalsenii_DSM44353","Cglutamicum_ATCC13032","Cglycinophilum_AJ3170","Chalotolerans_YIM70093","Chumireducens_DSM45392","Cimitans_DSM44264","Cjeike…	0.0950071	0.0950071	1.24404	0.0950071	0.0950071	1.24404	258	0
ERS451417_00230	1717.62.peg.226	NA	NA	NA	1	38	Cargentoratense_DSM44202,"Catypicum_R2070","Caurimucosum_ATCC700975","Cbelfantii_FRC0043","Ccallunae_DSM20147","Ccamporealensis_DSM44610","Cdeserti_GIMN1010","Cdiphtheriae_NCTC11397","Cdoosanense_DSM45436","Cefficiens_YS314","Cepidermidicanis_DSM45586","Cfalsenii_DSM44353","Cglutamicum_ATCC13032","Cglycinophilum_AJ3170","Chalotolerans_YIM70093","Chumireducens_DSM45392","Cimitans_DSM44264","Cjeike…	0.184775	0.184775	1.97092	0.184775	0.184775	1.97092	3074	2	1. 0.5338;2. 99;3. 295;4. 129;5. 129;6. 385;7. 135;8. 403;9. 106;10. I;11. ATT	1. 0.57387;2. 238;3. 712;4. 277;5. 277;6. 829;7. 294;8. 880;9. 469;10. V;11. GTG
ERS451417_00779	1717.62.peg.786	NA	NA	NA	1	34	Cargentoratense_DSM44202,"Catypicum_R2070","Caurimucosum_ATCC700975","Cbelfantii_FRC0043","Ccallunae_DSM20147","Ccamporealensis_DSM44610","Cdeserti_GIMN1010","Cdiphtheriae_NCTC11397","Cdoosanense_DSM45436","Cefficiens_YS314","Cepidermidicanis_DSM45586","Cfalsenii_DSM44353","Cglutamicum_ATCC13032","Chalotolerans_YIM70093","Chumireducens_DSM45392","Cimitans_DSM44264","Cjeikeium_K41","Ckutscheri_DSM…	0.410258	0.410258	1.5524	0.410258	0.410258	1.5524	3330	0
ERS451417_00392	1717.62.peg.392	NA	NA	NA	1	39	Cargentoratense_DSM44202,"Catypicum_R2070","Caurimucosum_ATCC700975","Cbelfantii_FRC0043","Ccallunae_DSM20147","Ccamporealensis_DSM44610","Cdeserti_GIMN1010","Cdiphtheriae_NCTC11397","Cdoosanense_DSM45436","Cefficiens_YS314","Cepidermidicanis_DSM45586","Cfalsenii_DSM44353","Cglutamicum_ATCC13032","Cglycinophilum_AJ3170","Chalotolerans_YIM70093","Chumireducens_DSM45392","Cimitans_DSM44264","Cjeike…	0.180765	0.180765	1.70133	0.180765	0.180765	1.70134	258	0
ERS451417_00002	1717.62.peg.3	NA	NA	NA	1	39	Cargentoratense_DSM44202,"Catypicum_R2070","Caurimucosum_ATCC700975","Cbelfantii_FRC0043","Ccallunae_DSM20147","Ccamporealensis_DSM44610","Cdeserti_GIMN1010","Cdiphtheriae_NCTC11397","Cdoosanense_DSM45436","Cefficiens_YS314","Cepidermidicanis_DSM45586","Cfalsenii_DSM44353","Cglutamicum_ATCC13032","Cglycinophilum_AJ3170","Chalotolerans_YIM70093","Chumireducens_DSM45392","Cimitans_DSM44264","Cjeike…	0.185217	0.185217	1.76896	0.185217	0.185217	1.76896	2306	0
ERS451417_01010	1717.62.peg.1021	NA	NA	NA	1	39	Cargentoratense_DSM44202,"Catypicum_R2070","Caurimucosum_ATCC700975","Cbelfantii_FRC0043","Ccallunae_DSM20147","Ccamporealensis_DSM44610","Cdeserti_GIMN1010","Cdiphtheriae_NCTC11397","Cdoosanense_DSM45436","Cefficiens_YS314","Cepidermidicanis_DSM45586","Cfalsenii_DSM44353","Cglutamicum_ATCC13032","Cglycinophilum_AJ3170","Chalotolerans_YIM70093","Chumireducens_DSM45392","Cimitans_DSM44264","Cjeike…	0.201184	0.201184	1.88524	0.201184	0.201184	1.88524	258	0
ERS451417_00175	1717.62.peg.173	NA	NA	NA	1	8	Cbelfantii_FRC0043,"Cdiphtheriae_NCTC11397","Ckutscheri_DSM20755","Cpseudotuberculosis_31","Cpseudotuberculosis_ATCC19410","Csilvaticum_KL0182","Culcerans_NCTC12077","Culcerans_NCTC7910"	0.168332	0.168332	4.53915	0.168332	0.168332	4.53912	258	0
ERS451417_00542	1717.62.peg.546	NA	NA	NA	1	38	Cargentoratense_DSM44202,"Catypicum_R2070","Caurimucosum_ATCC700975","Cbelfantii_FRC0043","Ccallunae_DSM20147","Ccamporealensis_DSM44610","Cdeserti_GIMN1010","Cdiphtheriae_NCTC11397","Cdoosanense_DSM45436","Cefficiens_YS314","Cepidermidicanis_DSM45586","Cfalsenii_DSM44353","Cglutamicum_ATCC13032","Chalotolerans_YIM70093","Chumireducens_DSM45392","Cimitans_DSM44264","Cjeikeium_K41","Ckroppenstedti…	0.302889	0.302889	1.59949	0.302889	0.302889	1.59949	3330	0
ERS451417_02071	1717.62.peg.2083	NA	NA	NA	1	17	Cargentoratense_DSM44202,"Catypicum_R2070","Cbelfantii_FRC0043","Ccamporealensis_DSM44610","Cdeserti_GIMN1010","Cdiphtheriae_NCTC11397","Cefficiens_YS314","Cepidermidicanis_DSM45586","Cjeikeium_K41","Ckutscheri_DSM20755","Cmustelae_DSM45274","Cpseudotuberculosis_31","Cpseudotuberculosis_ATCC19410","Csilvaticum_KL0182","Culcerans_NCTC12077","Culcerans_NCTC7910","Cvitaeruminis_DSM20294"	0.158556	0.158556	1.66834	0.158556	0.158556	1.66834	2	3	1. 0.44006;2. 111;3. 331;4. 159;5. 121;6. 361;7. 180;8. 538;9. 250;10. A;11. GCG	1. 0.49133;2. 191;3. 571;4. 244;5. 206;6. 616;7. 265;8. 793;9. 484;10. A;11. GCC	1. 0.45643;2. 326;3. 976;4. 413;5. 348;6. 1042;7. 414;8. 1240;9. 799;10. K;11. AAG
ERS451417_01214	1717.62.peg.1222	NA	NA	NA	1	26	Cargentoratense_DSM44202,"Caurimucosum_ATCC700975","Ccamporealensis_DSM44610","Cdiphtheriae_NCTC11397","Cdoosanense_DSM45436","Cepidermidicanis_DSM45586","Chalotolerans_YIM70093","Chumireducens_DSM45392","Cimitans_DSM44264","Cjeikeium_K41","Cmarinum_DSM44953","Cmaris_DSM45190","Cmustelae_DSM45274","Cpseudotuberculosis_31","Cpseudotuberculosis_ATCC19410","CriegeliiPUDD83A45","Crouxii_FRC0190","Csi…	0.226874	0.226874	1.67114	0.226874	0.226874	1.67114	3330	0
ERS451417_01256	1717.62.peg.1264	NA	NA	NA	1	38	Cargentoratense_DSM44202,"Catypicum_R2070","Caurimucosum_ATCC700975","Cbelfantii_FRC0043","Ccallunae_DSM20147","Ccamporealensis_DSM44610","Cdeserti_GIMN1010","Cdiphtheriae_NCTC11397","Cdoosanense_DSM45436","Cefficiens_YS314","Cepidermidicanis_DSM45586","Cfalsenii_DSM44353","Cglutamicum_ATCC13032","Cglycinophilum_AJ3170","Chalotolerans_YIM70093","Chumireducens_DSM45392","Cimitans_DSM44264","Cjeike…	0.243831	0.243822	1.73847	0.243822	0.243822	1.73847	258	0
ERS451417_00386	1717.62.peg.386	NA	NA	NA	1	11	Cargentoratense_DSM44202,"Catypicum_R2070","Cbelfantii_FRC0043","Cdiphtheriae_NCTC11397","Cpseudotuberculosis_31","Cpseudotuberculosis_ATCC19410","Crouxii_FRC0190","Csilvaticum_KL0182","Culcerans_NCTC12077","Culcerans_NCTC7910","Cuterequi_DSM45634"	0.201503	0.201503	2.59492	0.201542	0.201513	2.59492	2	1	1. 0.54582;2. 100;3. 298;4. 127;5. 127;6. 379;7. 133;8. 397;9. 178;10. V;11. GTC
ERS451417_00713	1717.62.peg.718	NA	NA	NA	1	39	Cargentoratense_DSM44202,"Catypicum_R2070","Caurimucosum_ATCC700975","Cbelfantii_FRC0043","Ccallunae_DSM20147","Ccamporealensis_DSM44610","Cdeserti_GIMN1010","Cdiphtheriae_NCTC11397","Cdoosanense_DSM45436","Cefficiens_YS314","Cepidermidicanis_DSM45586","Cfalsenii_DSM44353","Cglutamicum_ATCC13032","Cglycinophilum_AJ3170","Chalotolerans_YIM70093","Chumireducens_DSM45392","Cimitans_DSM44264","Cjeike…	0.11197	0.11197	1.88591	0.11197	0.11197	1.88591	2	3	1. 0.65173;2. 27;3. 79;4. 61;5. 61;6. 181;7. 94;8. 280;9. 52;10. A;11. GCA	1. 0.58104;2. 156;3. 466;4. 190;5. 190;6. 568;7. 223;8. 667;9. 439;10. N;11. AAC	1. 0.52397;2. 191;3. 571;4. 225;5. 225;6. 673;7. 258;8. 772;9. 544;10. M;11. ATG
ERS451417_00188	1717.62.peg.184	NA	NA	NA	1	39	Cargentoratense_DSM44202,"Catypicum_R2070","Caurimucosum_ATCC700975","Cbelfantii_FRC0043","Ccallunae_DSM20147","Ccamporealensis_DSM44610","Cdeserti_GIMN1010","Cdiphtheriae_NCTC11397","Cdoosanense_DSM45436","Cefficiens_YS314","Cepidermidicanis_DSM45586","Cfalsenii_DSM44353","Cglutamicum_ATCC13032","Cglycinophilum_AJ3170","Chalotolerans_YIM70093","Chumireducens_DSM45392","Cimitans_DSM44264","Cjeike…	0.147253	0.147253	1.86435	0.147253	0.147253	1.86435	2	2	1. 0.51412;2. 262;3. 784;4. 282;5. 282;6. 844;7. 298;8. 892;9. 712;10. I;11. ATT	1. 0.42077;2. 462;3. 1384;4. 489;5. 489;6. 1465;7. 529;8. 1585;9. 1243;10. I;11. ATC
ERS451417_00028	1717.62.peg.25	NA	NA	NA	1	8	Cbelfantii_FRC0043,"Cdiphtheriae_NCTC11397","Cpseudotuberculosis_31","Cpseudotuberculosis_ATCC19410","Crouxii_FRC0190","Csilvaticum_KL0182","Culcerans_NCTC12077","Culcerans_NCTC7910"	0.448797	0.144175	3.42133	0.448797	0.144175	3.42133	2	3	1. 0.62941;2. 48;3. 142;4. 74;5. 60;6. 178;7. 49;8. 145;9. 130;10. S;11. AGC	1. 0.69811;2. 152;3. 454;4. 220;5. 175;6. 523;7. 175;8. 523;9. 388;10. R;11. CGC	1. 0.84969;2. 173;3. 517;4. 262;5. 196;6. 586;7. 196;8. 586;9. 451;10. Q;11. CAA
ERS451417_00231	1717.62.peg.227	NA	NA	NA	1	39	Cargentoratense_DSM44202,"Catypicum_R2070","Caurimucosum_ATCC700975","Cbelfantii_FRC0043","Ccallunae_DSM20147","Ccamporealensis_DSM44610","Cdeserti_GIMN1010","Cdiphtheriae_NCTC11397","Cdoosanense_DSM45436","Cefficiens_YS314","Cepidermidicanis_DSM45586","Cfalsenii_DSM44353","Cglutamicum_ATCC13032","Cglycinophilum_AJ3170","Chalotolerans_YIM70093","Chumireducens_DSM45392","Cimitans_DSM44264","Cjeike…	0.089889	0.089889	2.10483	0.089889	0.089889	2.10483	258	0
ERS451417_00872	1717.62.peg.878	NA	NA	NA	1	39	Cargentoratense_DSM44202,"Catypicum_R2070","Caurimucosum_ATCC700975","Cbelfantii_FRC0043","Ccallunae_DSM20147","Ccamporealensis_DSM44610","Cdeserti_GIMN1010","Cdiphtheriae_NCTC11397","Cdoosanense_DSM45436","Cefficiens_YS314","Cepidermidicanis_DSM45586","Cfalsenii_DSM44353","Cglutamicum_ATCC13032","Cglycinophilum_AJ3170","Chalotolerans_YIM70093","Chumireducens_DSM45392","Cimitans_DSM44264","Cjeike…	0.135525	0.135525	1.92009	0.135516	0.135516	1.92009	258	0
ERS451417_01272	1717.62.peg.1280	NA	NA	NA	1	17	Cargentoratense_DSM44202,"Cbelfantii_FRC0043","Cdiphtheriae_NCTC11397","Cefficiens_YS314","Cepidermidicanis_DSM45586","Cglutamicum_ATCC13032","Ckroppenstedtii_DSM44385","Ckutscheri_DSM20755","Clactis_RW25","Cmustelae_DSM45274","Cpseudotuberculosis_31","Cpseudotuberculosis_ATCC19410","Crouxii_FRC0190","Csilvaticum_KL0182","Culcerans_NCTC12077","Culcerans_NCTC7910","Cvitaeruminis_DSM20294"	0.0719204	0.0719204	2.12246	0.0719204	0.0719204	2.12244	258	0
ERS451417_00718	1717.62.peg.723	NA	NA	NA	1	29	Cargentoratense_DSM44202,"Caurimucosum_ATCC700975","Cbelfantii_FRC0043","Ccallunae_DSM20147","Ccamporealensis_DSM44610","Cdeserti_GIMN1010","Cdiphtheriae_NCTC11397","Cdoosanense_DSM45436","Cefficiens_YS314","Cepidermidicanis_DSM45586","Cglutamicum_ATCC13032","Chalotolerans_YIM70093","Chumireducens_DSM45392","Cimitans_DSM44264","Cmarinum_DSM44953","Cmaris_DSM45190","Cmustelae_DSM45274","Cpseudotub…	0.999981	0.282424	1.72637	1	0.282425	1.72637	2048	2	1. 0.90191;2. 83;3. 247;4. 84;5. 84;6. 250;7. 88;8. 262;9. 181;10. V;11. GTT	1. 0.93418;2. 91;3. 271;4. 92;5. 92;6. 274;7. 96;8. 286;9. 205;10. V;11. GTC
ERS451417_01990	1717.62.peg.1991	NA	NA	NA	1	7	Cbelfantii_FRC0043,"Cdiphtheriae_NCTC11397","Cpseudotuberculosis_ATCC19410","Csilvaticum_KL0182","Culcerans_NCTC12077","Culcerans_NCTC7910","Cvitaeruminis_DSM20294"	0.24758	0.24758	3.145	0.24758	0.24758	3.145	2	4	1. 0.62518;2. 49;3. 145;4. 117;5. 86;6. 256;7. 86;8. 256;9. 103;10. P;11. CCT	1. 0.41146;2. 86;3. 256;4. 162;5. 126;6. 376;7. 126;8. 376;9. 196;10. E;11. GAA	1. 0.62067;2. 175;3. 523;4. 315;5. 215;6. 643;7. 215;8. 643;9. 463;10. R;11. CGA	1. 0.6498;2. 185;3. 553;4. 325;5. 225;6. 673;7. 225;8. 673;9. 493;10. A;11. GCA
ERS451417_01602	1717.62.peg.1611	NA	NA	NA	1	38	Cargentoratense_DSM44202,"Catypicum_R2070","Caurimucosum_ATCC700975","Cbelfantii_FRC0043","Ccallunae_DSM20147","Ccamporealensis_DSM44610","Cdeserti_GIMN1010","Cdiphtheriae_NCTC11397","Cdoosanense_DSM45436","Cefficiens_YS314","Cepidermidicanis_DSM45586","Cfalsenii_DSM44353","Cglutamicum_ATCC13032","Cglycinophilum_AJ3170","Chalotolerans_YIM70093","Chumireducens_DSM45392","Cimitans_DSM44264","Cjeike…	0.100927	0.100927	1.59036	0.100927	0.100927	1.59036	258	0
ERS451417_01633	1717.62.peg.1640	NA	NA	NA	1	10	Cbelfantii_FRC0043,"Cdiphtheriae_NCTC11397","Cefficiens_YS314","Cmustelae_DSM45274","Cpseudotuberculosis_31","Cpseudotuberculosis_ATCC19410","Csilvaticum_KL0182","Culcerans_NCTC12077","Culcerans_NCTC7910","Cvitaeruminis_DSM20294"	0.365239	0.365239	3.75829	0.365239	0.365239	3.75829	2	1	1. 0.45757;2. 105;3. 313;4. 127;5. 115;6. 343;7. 115;8. 343;9. 286;10. V;11. GTG
ERS451417_00332	1717.62.peg.334	NA	NA	NA	1	39	Cargentoratense_DSM44202,"Catypicum_R2070","Caurimucosum_ATCC700975","Cbelfantii_FRC0043","Ccallunae_DSM20147","Ccamporealensis_DSM44610","Cdeserti_GIMN1010","Cdiphtheriae_NCTC11397","Cdoosanense_DSM45436","Cefficiens_YS314","Cepidermidicanis_DSM45586","Cfalsenii_DSM44353","Cglutamicum_ATCC13032","Cglycinophilum_AJ3170","Chalotolerans_YIM70093","Chumireducens_DSM45392","Cimitans_DSM44264","Cjeike…	0.186547	0.186547	1.77437	0.186547	0.186547	1.77437	1026	1	1. 0.42583;2. 102;3. 304;4. 285;5. 285;6. 853;7. 359;8. 1075;9. 265;10. I;11. ATT
ERS451417_00900	1717.62.peg.906	NA	NA	NA	1	39	Cargentoratense_DSM44202,"Catypicum_R2070","Caurimucosum_ATCC700975","Cbelfantii_FRC0043","Ccallunae_DSM20147","Ccamporealensis_DSM44610","Cdeserti_GIMN1010","Cdiphtheriae_NCTC11397","Cdoosanense_DSM45436","Cefficiens_YS314","Cepidermidicanis_DSM45586","Cfalsenii_DSM44353","Cglutamicum_ATCC13032","Cglycinophilum_AJ3170","Chalotolerans_YIM70093","Chumireducens_DSM45392","Cimitans_DSM44264","Cjeike…	0.144599	0.144599	1.71265	0.144599	0.144599	1.71263	2050	1	1. 0.50975;2. 161;3. 481;4. 186;5. 186;6. 556;7. 214;8. 640;9. 367;10. L;11. CTC
ERS451417_01039	1717.62.peg.1049	NA	NA	NA	1	8	Cbelfantii_FRC0043,"Cdiphtheriae_NCTC11397","Cpseudotuberculosis_31","Cpseudotuberculosis_ATCC19410","Crouxii_FRC0190","Csilvaticum_KL0182","Culcerans_NCTC12077","Culcerans_NCTC7910"	0.112107	0.112107	3.34996	0.112107	0.112107	3.34996	258	0
ERS451417_00943	1717.62.peg.950	NA	NA	NA	1	14	Catypicum_R2070,"Cbelfantii_FRC0043","Cdiphtheriae_NCTC11397","Cepidermidicanis_DSM45586","Ckutscheri_DSM20755","Clactis_RW25","Cpseudotuberculosis_31","Cpseudotuberculosis_ATCC19410","Crouxii_FRC0190","Csilvaticum_KL0182","Culcerans_NCTC12077","Culcerans_NCTC7910","Cuterequi_DSM45634","Cvitaeruminis_DSM20294"	0.147569	0.147569	1.95956	0.147569	0.147569	1.95955	258	0
ERS451417_00311	1717.62.peg.312	NA	NA	NA	1	39	Cargentoratense_DSM44202,"Catypicum_R2070","Caurimucosum_ATCC700975","Cbelfantii_FRC0043","Ccallunae_DSM20147","Ccamporealensis_DSM44610","Cdeserti_GIMN1010","Cdiphtheriae_NCTC11397","Cdoosanense_DSM45436","Cefficiens_YS314","Cepidermidicanis_DSM45586","Cfalsenii_DSM44353","Cglutamicum_ATCC13032","Cglycinophilum_AJ3170","Chalotolerans_YIM70093","Chumireducens_DSM45392","Cimitans_DSM44264","Cjeike…	0.212654	0.212654	1.93981	0.212654	0.212654	1.93981	258	0
ERS451417_00715	1717.62.peg.720	NA	NA	NA	1	16	Cargentoratense_DSM44202,"Cbelfantii_FRC0043","Cdeserti_GIMN1010","Cdiphtheriae_NCTC11397","Cefficiens_YS314","Cepidermidicanis_DSM45586","Cglutamicum_ATCC13032","Ckroppenstedtii_DSM44385","Clactis_RW25","Cmustelae_DSM45274","Cpseudotuberculosis_31","Cpseudotuberculosis_ATCC19410","Crouxii_FRC0190","Culcerans_NCTC12077","Culcerans_NCTC7910","Cvitaeruminis_DSM20294"	0.163115	0.163115	2.1137	0.163115	0.163115	2.1137	6146	3	1. 0.48865;2. 41;3. 121;4. 60;5. 60;6. 178;7. 77;8. 229;9. 85;10. K;11. AAG	1. 0.51591;2. 44;3. 130;4. 63;5. 63;6. 187;7. 80;8. 238;9. 94;10. E;11. GAA	1. 0.48146;2. 205;3. 613;4. 224;5. 224;6. 670;7. 241;8. 721;9. 577;10. I;11. ATT
ERS451417_00951	1717.62.peg.958	NA	NA	NA	1	39	Cargentoratense_DSM44202,"Catypicum_R2070","Caurimucosum_ATCC700975","Cbelfantii_FRC0043","Ccallunae_DSM20147","Ccamporealensis_DSM44610","Cdeserti_GIMN1010","Cdiphtheriae_NCTC11397","Cdoosanense_DSM45436","Cefficiens_YS314","Cepidermidicanis_DSM45586","Cfalsenii_DSM44353","Cglutamicum_ATCC13032","Cglycinophilum_AJ3170","Chalotolerans_YIM70093","Chumireducens_DSM45392","Cimitans_DSM44264","Cjeike…	0.104202	0.104202	1.59654	0.104202	0.104202	1.59654	2	1	1. 0.50757;2. 280;3. 838;4. 299;5. 299;6. 895;7. 304;8. 910;9. 823;10. A;11. GCT
ERS451417_02327	1717.62.peg.2354	NA	NA	NA	1	16	Catypicum_R2070,"Cbelfantii_FRC0043","Cdeserti_GIMN1010","Cdiphtheriae_NCTC11397","Cdoosanense_DSM45436","Cefficiens_YS314","Cglutamicum_ATCC13032","Cglycinophilum_AJ3170","Chalotolerans_YIM70093","Ckutscheri_DSM20755","Cmaris_DSM45190","Cpseudotuberculosis_31","Cpseudotuberculosis_ATCC19410","Cterpenotabidum_Y11","Culcerans_NCTC12077","Culcerans_NCTC7910"	0.167006	0.167006	1.51594	0.167006	0.167006	1.51594	4354	0
ERS451417_02149	1717.62.peg.2171	NA	NA	NA	1	7	Cbelfantii_FRC0043,"Cdiphtheriae_NCTC11397","Clactis_RW25","Cpseudotuberculosis_ATCC19410","Csilvaticum_KL0182","Culcerans_NCTC12077","Culcerans_NCTC7910"	0.0764101	0.0764101	2.66259	0.0764101	0.0764101	2.66258	2050	1	1. 0.62096;2. 397;3. 1189;4. 453;5. 451;6. 1351;7. 493;8. 1477;9. 874;10. P;11. CCC
ERS451417_01490	1717.62.peg.1498	NA	NA	NA	1	36	Cargentoratense_DSM44202,"Catypicum_R2070","Caurimucosum_ATCC700975","Cbelfantii_FRC0043","Ccallunae_DSM20147","Ccamporealensis_DSM44610","Cdeserti_GIMN1010","Cdiphtheriae_NCTC11397","Cdoosanense_DSM45436","Cefficiens_YS314","Cepidermidicanis_DSM45586","Cfalsenii_DSM44353","Cglutamicum_ATCC13032","Cglycinophilum_AJ3170","Chalotolerans_YIM70093","Chumireducens_DSM45392","Cimitans_DSM44264","Cjeike…	0.197037	0.17935	1.70379	0.197037	0.17935	1.70379	2050	2	1. 0.49149;2. 54;3. 160;4. 56;5. 56;6. 166;7. 74;8. 220;9. 49;10. P;11. CCT	1. 0.64993;2. 185;3. 553;4. 191;5. 191;6. 571;7. 212;8. 634;9. 409;10. I;11. ATC
ERS451417_01772	1717.62.peg.1774	NA	NA	NA	1	20	Catypicum_R2070,"Cbelfantii_FRC0043","Ccallunae_DSM20147","Ccamporealensis_DSM44610","Cdeserti_GIMN1010","Cdiphtheriae_NCTC11397","Cefficiens_YS314","Cfalsenii_DSM44353","Cglutamicum_ATCC13032","Chalotolerans_YIM70093","Cimitans_DSM44264","Cjeikeium_K41","Cmarinum_DSM44953","Cpseudotuberculosis_31","Cpseudotuberculosis_ATCC19410","Csimulans_PES1","Culcerans_NCTC12077","Culcerans_NCTC7910","Cureal…	0.191154	0.191154	2.02933	0.191154	0.191154	2.02933	7426	0
ERS451417_02326	1717.62.peg.2353	NA	NA	NA	1	7	Cbelfantii_FRC0043,"Cdiphtheriae_NCTC11397","Cpseudotuberculosis_31","Cpseudotuberculosis_ATCC19410","Csilvaticum_KL0182","Culcerans_NCTC12077","Culcerans_NCTC7910"	0.0409915	0.0409915	3.25439	0.0409915	0.0409915	3.25439	258	0
ERS451417_02007	1717.62.peg.2012	NA	NA	NA	1	14	Cbelfantii_FRC0043,"Cdeserti_GIMN1010","Cdiphtheriae_NCTC11397","Cefficiens_YS314","Cglutamicum_ATCC13032","Cglycinophilum_AJ3170","Chalotolerans_YIM70093","Ckutscheri_DSM20755","Cpseudotuberculosis_31","Cpseudotuberculosis_ATCC19410","Csilvaticum_KL0182","Ctestudinoris_DSM44614","Culcerans_NCTC12077","Culcerans_NCTC7910"	0.0349	0.0349	3.14965	0.0349	0.0349	3.14965	3330	0
ERS451417_00395	1717.62.peg.395	NA	NA	NA	1	39	Cargentoratense_DSM44202,"Catypicum_R2070","Caurimucosum_ATCC700975","Cbelfantii_FRC0043","Ccallunae_DSM20147","Ccamporealensis_DSM44610","Cdeserti_GIMN1010","Cdiphtheriae_NCTC11397","Cdoosanense_DSM45436","Cefficiens_YS314","Cepidermidicanis_DSM45586","Cfalsenii_DSM44353","Cglutamicum_ATCC13032","Cglycinophilum_AJ3170","Chalotolerans_YIM70093","Chumireducens_DSM45392","Cimitans_DSM44264","Cjeike…	0.156099	0.0172366	2.55815	0.0624888	0.0172466	2.55815	258	0
ERS451417_02356	1717.62.peg.2384	NA	NA	NA	1	9	Cbelfantii_FRC0043,"Cdiphtheriae_NCTC11397","Ckutscheri_DSM20755","Cpseudotuberculosis_31","Cpseudotuberculosis_ATCC19410","Csilvaticum_KL0182","Culcerans_NCTC12077","Culcerans_NCTC7910","Cvitaeruminis_DSM20294"	0.0853589	0.0853589	2.86555	0.0853589	0.0853589	2.86554	2	1	1. 0.55917;2. 605;3. 1813;4. 745;5. 640;6. 1918;7. 646;8. 1936;9. 1654;10. I;11. ATT
ERS451417_01359	1717.62.peg.1367	NA	NA	NA	1	7	Cbelfantii_FRC0043,"Cdiphtheriae_NCTC11397","Cpseudotuberculosis_31","Cpseudotuberculosis_ATCC19410","Csilvaticum_KL0182","Culcerans_NCTC12077","Culcerans_NCTC7910"	0.180551	0.180551	4.18817	0.180551	0.180551	4.18817	2	1	1. 0.45224;2. 22;3. 64;4. 41;5. 22;6. 64;7. 22;8. 64;9. 64;10. Q;11. CAA
ERS451417_00342	1717.62.peg.345	NA	NA	NA	1	33	Cargentoratense_DSM44202,"Catypicum_R2070","Caurimucosum_ATCC700975","Cbelfantii_FRC0043","Ccallunae_DSM20147","Ccamporealensis_DSM44610","Cdeserti_GIMN1010","Cdiphtheriae_NCTC11397","Cdoosanense_DSM45436","Cefficiens_YS314","Cepidermidicanis_DSM45586","Cglutamicum_ATCC13032","Chalotolerans_YIM70093","Chumireducens_DSM45392","Cimitans_DSM44264","Ckutscheri_DSM20755","Clactis_RW25","Cmarinum_DSM44…	0.241785	0.241785	1.6847	0.241785	0.241785	1.68467	3074	1	1. 0.48411;2. 307;3. 919;4. 455;5. 378;6. 1132;7. 434;8. 1300;9. 730;10. A;11. GCC
ERS451417_01258	1717.62.peg.1266	NA	NA	NA	1	18	Cargentoratense_DSM44202,"Cbelfantii_FRC0043","Ccallunae_DSM20147","Cdeserti_GIMN1010","Cdiphtheriae_NCTC11397","Cdoosanense_DSM45436","Cepidermidicanis_DSM45586","Cglutamicum_ATCC13032","Chalotolerans_YIM70093","Chumireducens_DSM45392","Ckutscheri_DSM20755","Cmarinum_DSM44953","Cpseudotuberculosis_ATCC19410","Crouxii_FRC0190","Ctestudinoris_DSM44614","Culcerans_NCTC12077","Culcerans_NCTC7910","C…	0.312479	0.312479	1.37126	0.312479	0.312479	1.37126	6146	1	1. 0.71646;2. 205;3. 613;4. 223;5. 208;6. 622;7. 227;8. 679;9. 448;10. L;11. CTG
ERS451417_00917	1717.62.peg.924	NA	NA	NA	1	18	Catypicum_R2070,"Cbelfantii_FRC0043","Ccamporealensis_DSM44610","Cdiphtheriae_NCTC11397","Cepidermidicanis_DSM45586","Cfalsenii_DSM44353","Cglycinophilum_AJ3170","Cjeikeium_K41","Ckroppenstedtii_DSM44385","Cpseudotuberculosis_31","Cpseudotuberculosis_ATCC19410","Crouxii_FRC0190","Csilvaticum_KL0182","Csimulans_PES1","Culcerans_NCTC12077","Culcerans_NCTC7910","Cuterequi_DSM45634","Cvitaeruminis_DS…	0.252806	0.172387	1.71743	0.252806	0.172387	1.71743	2050	4	1. 0.55557;2. 140;3. 418;4. 181;5. 181;6. 541;7. 220;8. 658;9. 316;10. D;11. GAT	1. 0.6497;2. 238;3. 712;4. 279;5. 279;6. 835;7. 319;8. 955;9. 568;10. Q;11. CAA	1. 0.648;2. 270;3. 808;4. 311;5. 311;6. 931;7. 351;8. 1051;9. 664;10. V;11. GTA	1. 0.65751;2. 330;3. 988;4. 378;5. 378;6. 1132;7. 422;8. 1264;9. 781;10. L;11. CTG
ERS451417_02360	1717.62.peg.2389	NA	NA	NA	1	12	Caurimucosum_ATCC700975,"Cbelfantii_FRC0043","Cdiphtheriae_NCTC11397","Ckroppenstedtii_DSM44385","Cpseudotuberculosis_31","Cpseudotuberculosis_ATCC19410","Csilvaticum_KL0182","Csimulans_PES1","Csingulare_IBSB52218","Culcerans_NCTC12077","Culcerans_NCTC7910","Cuterequi_DSM45634"	0.118221	0.118221	2.41638	0.118221	0.118221	2.41639	2	3	1. 0.43287;2. 60;3. 178;4. 85;5. 76;6. 226;7. 77;8. 229;9. 142;10. A;11. GCT	1. 0.44038;2. 93;3. 277;4. 118;5. 109;6. 325;7. 110;8. 328;9. 241;10. D;11. GAT	1. 0.40484;2. 121;3. 361;4. 146;5. 137;6. 409;7. 138;8. 412;9. 325;10. F;11. TTT
ERS451417_01274	1717.62.peg.1282	NA	NA	NA	1	17	Cargentoratense_DSM44202,"Cbelfantii_FRC0043","Cdiphtheriae_NCTC11397","Cefficiens_YS314","Cepidermidicanis_DSM45586","Cglutamicum_ATCC13032","Ckroppenstedtii_DSM44385","Ckutscheri_DSM20755","Clactis_RW25","Cmustelae_DSM45274","Cpseudotuberculosis_31","Cpseudotuberculosis_ATCC19410","Crouxii_FRC0190","Csilvaticum_KL0182","Culcerans_NCTC12077","Culcerans_NCTC7910","Cvitaeruminis_DSM20294"	0.236819	0.236819	2.0857	0.236819	0.236819	2.0857	2050	1	1. 0.41444;2. 288;3. 862;4. 317;5. 317;6. 949;7. 403;8. 1207;9. 571;10. E;11. GAA
ERS451417_00461	1717.62.peg.465	NA	NA	NA	1	39	Cargentoratense_DSM44202,"Catypicum_R2070","Caurimucosum_ATCC700975","Cbelfantii_FRC0043","Ccallunae_DSM20147","Ccamporealensis_DSM44610","Cdeserti_GIMN1010","Cdiphtheriae_NCTC11397","Cdoosanense_DSM45436","Cefficiens_YS314","Cepidermidicanis_DSM45586","Cfalsenii_DSM44353","Cglutamicum_ATCC13032","Cglycinophilum_AJ3170","Chalotolerans_YIM70093","Chumireducens_DSM45392","Cimitans_DSM44264","Cjeike…	0.755321	0.432081	1.73657	0.54424	0.432091	1.73657	258	0
ERS451417_02234	1717.62.peg.2259	NA	NA	NA	1	6	Cbelfantii_FRC0043,"Cdiphtheriae_NCTC11397","Cpseudotuberculosis_31","Cpseudotuberculosis_ATCC19410","Culcerans_NCTC12077","Culcerans_NCTC7910"	0.402881	0.402881	4.03748	0.402881	0.402881	4.03749	4098	2	1. 0.48955;2. 108;3. 322;4. 280;5. 111;6. 331;7. 112;8. 334;9. 247;10. T;11. ACG	1. 0.41235;2. 131;3. 391;4. 322;5. 134;6. 400;7. 135;8. 403;9. 310;10. A;11. GCG
ERS451417_01944	1717.62.peg.1942	NA	NA	NA	1	16	Catypicum_R2070,"Caurimucosum_ATCC700975","Cbelfantii_FRC0043","Cdiphtheriae_NCTC11397","Cjeikeium_K41","Ckroppenstedtii_DSM44385","Clactis_RW25","Cpseudotuberculosis_31","Cpseudotuberculosis_ATCC19410","CriegeliiPUDD83A45","Csilvaticum_KL0182","Csimulans_PES1","Culcerans_NCTC12077","Culcerans_NCTC7910","Curealyticum_DSM7109","Cuterequi_DSM45634"	0.110201	0.110201	2.16025	0.110201	0.110201	2.16025	2306	0
ERS451417_00991	1717.62.peg.1002	NA	NA	NA	1	28	Cargentoratense_DSM44202,"Cbelfantii_FRC0043","Cdeserti_GIMN1010","Cdiphtheriae_NCTC11397","Cefficiens_YS314","Cepidermidicanis_DSM45586","Cfalsenii_DSM44353","Cglutamicum_ATCC13032","Cglycinophilum_AJ3170","Chalotolerans_YIM70093","Chumireducens_DSM45392","Cjeikeium_K41","Ckroppenstedtii_DSM44385","Ckutscheri_DSM20755","Cmarinum_DSM44953","Cmaris_DSM45190","Cmustelae_DSM45274","Cpseudotuberculos…	0.188286	0.188286	1.70293	0.188286	0.188286	1.70293	3074	1	1. 0.50215;2. 124;3. 370;4. 147;5. 147;6. 439;7. 196;8. 586;9. 265;10. I;11. ATC
ERS451417_01293	1717.62.peg.1301	NA	NA	NA	1	38	Cargentoratense_DSM44202,"Catypicum_R2070","Caurimucosum_ATCC700975","Cbelfantii_FRC0043","Ccallunae_DSM20147","Ccamporealensis_DSM44610","Cdeserti_GIMN1010","Cdiphtheriae_NCTC11397","Cdoosanense_DSM45436","Cefficiens_YS314","Cepidermidicanis_DSM45586","Cfalsenii_DSM44353","Cglutamicum_ATCC13032","Cglycinophilum_AJ3170","Chalotolerans_YIM70093","Chumireducens_DSM45392","Cimitans_DSM44264","Cjeike…	0.0834708	0.0834708	1.52102	0.0834708	0.0834708	1.52102	258	0
ERS451417_00759	1717.62.peg.764	NA	NA	NA	1	36	Cargentoratense_DSM44202,"Caurimucosum_ATCC700975","Cbelfantii_FRC0043","Ccallunae_DSM20147","Ccamporealensis_DSM44610","Cdeserti_GIMN1010","Cdiphtheriae_NCTC11397","Cdoosanense_DSM45436","Cefficiens_YS314","Cepidermidicanis_DSM45586","Cfalsenii_DSM44353","Cglutamicum_ATCC13032","Cglycinophilum_AJ3170","Chalotolerans_YIM70093","Chumireducens_DSM45392","Cimitans_DSM44264","Cjeikeium_K41","Ckutsche…	0.142309	0.142309	1.78418	0.142309	0.142309	1.78418	3330	0
ERS451417_00985	1717.62.peg.996	NA	NA	NA	1	38	Cargentoratense_DSM44202,"Catypicum_R2070","Caurimucosum_ATCC700975","Cbelfantii_FRC0043","Ccallunae_DSM20147","Ccamporealensis_DSM44610","Cdeserti_GIMN1010","Cdiphtheriae_NCTC11397","Cdoosanense_DSM45436","Cefficiens_YS314","Cepidermidicanis_DSM45586","Cfalsenii_DSM44353","Cglutamicum_ATCC13032","Cglycinophilum_AJ3170","Chalotolerans_YIM70093","Chumireducens_DSM45392","Cimitans_DSM44264","Cjeike…	0.198506	0.198506	1.65799	0.198506	0.198506	1.65799	258	0
ERS451417_01202	1717.62.peg.1210	NA	NA	NA	1	39	Cargentoratense_DSM44202,"Catypicum_R2070","Caurimucosum_ATCC700975","Cbelfantii_FRC0043","Ccallunae_DSM20147","Ccamporealensis_DSM44610","Cdeserti_GIMN1010","Cdiphtheriae_NCTC11397","Cdoosanense_DSM45436","Cefficiens_YS314","Cepidermidicanis_DSM45586","Cfalsenii_DSM44353","Cglutamicum_ATCC13032","Cglycinophilum_AJ3170","Chalotolerans_YIM70093","Chumireducens_DSM45392","Cimitans_DSM44264","Cjeike…	0.149859	0.149859	1.5879	0.149859	0.149859	1.5879	3330	0
ERS451417_00173	1717.62.peg.171	NA	NA	NA	1	23	Catypicum_R2070,"Caurimucosum_ATCC700975","Cbelfantii_FRC0043","Ccallunae_DSM20147","Cdeserti_GIMN1010","Cdiphtheriae_NCTC11397","Cdoosanense_DSM45436","Cefficiens_YS314","Cepidermidicanis_DSM45586","Cfalsenii_DSM44353","Cglutamicum_ATCC13032","Chalotolerans_YIM70093","Ckroppenstedtii_DSM44385","Ckutscheri_DSM20755","Cmarinum_DSM44953","Cmaris_DSM45190","Cpseudotuberculosis_31","Cpseudotuberculos…	0.327739	0.327739	1.54899	0.327739	0.327739	1.54899	3330	0
ERS451417_01858	1717.62.peg.1860	NA	NA	NA	1	38	Cargentoratense_DSM44202,"Catypicum_R2070","Caurimucosum_ATCC700975","Cbelfantii_FRC0043","Ccallunae_DSM20147","Ccamporealensis_DSM44610","Cdeserti_GIMN1010","Cdiphtheriae_NCTC11397","Cdoosanense_DSM45436","Cefficiens_YS314","Cepidermidicanis_DSM45586","Cfalsenii_DSM44353","Cglutamicum_ATCC13032","Cglycinophilum_AJ3170","Chalotolerans_YIM70093","Chumireducens_DSM45392","Cimitans_DSM44264","Cjeike…	0.172167	0.172167	1.8841	0.172167	0.172167	1.8841	1026	3	1. 0.46845;2. 62;3. 184;4. 103;5. 103;6. 307;7. 230;8. 688;9. 133;10. N;11. AAC	1. 0.42065;2. 68;3. 202;4. 109;5. 109;6. 325;7. 236;8. 706;9. 151;10. A;11. GCT	1. 0.48651;2. 247;3. 739;4. 288;5. 288;6. 862;7. 415;8. 1243;9. 685;10. V;11. GTG
ERS451417_01784	1717.62.peg.1789	NA	NA	NA	1	26	Catypicum_R2070,"Caurimucosum_ATCC700975","Cbelfantii_FRC0043","Ccallunae_DSM20147","Ccamporealensis_DSM44610","Cdeserti_GIMN1010","Cdiphtheriae_NCTC11397","Cdoosanense_DSM45436","Cefficiens_YS314","Cglutamicum_ATCC13032","Chalotolerans_YIM70093","Chumireducens_DSM45392","Cimitans_DSM44264","Ckutscheri_DSM20755","Cmarinum_DSM44953","Cmaris_DSM45190","Cpseudotuberculosis_31","Cpseudotuberculosis_A…	0.121961	0.121961	1.88083	0.121961	0.121961	1.88083	3330	0
ERS451417_01141	1717.62.peg.1152	NA	NA	NA	1	39	Cargentoratense_DSM44202,"Catypicum_R2070","Caurimucosum_ATCC700975","Cbelfantii_FRC0043","Ccallunae_DSM20147","Ccamporealensis_DSM44610","Cdeserti_GIMN1010","Cdiphtheriae_NCTC11397","Cdoosanense_DSM45436","Cefficiens_YS314","Cepidermidicanis_DSM45586","Cfalsenii_DSM44353","Cglutamicum_ATCC13032","Cglycinophilum_AJ3170","Chalotolerans_YIM70093","Chumireducens_DSM45392","Cimitans_DSM44264","Cjeike…	1.35787	0.0818394	2.01281	0.087026	0.0818394	2.01298	256	0
ERS451417_02308	1717.62.peg.2335	NA	NA	NA	1	38	Cargentoratense_DSM44202,"Catypicum_R2070","Caurimucosum_ATCC700975","Cbelfantii_FRC0043","Ccallunae_DSM20147","Ccamporealensis_DSM44610","Cdeserti_GIMN1010","Cdiphtheriae_NCTC11397","Cdoosanense_DSM45436","Cefficiens_YS314","Cepidermidicanis_DSM45586","Cfalsenii_DSM44353","Cglutamicum_ATCC13032","Cglycinophilum_AJ3170","Chalotolerans_YIM70093","Chumireducens_DSM45392","Cimitans_DSM44264","Cjeike…	0.107086	0.107086	1.63465	0.107086	0.107086	1.63465	3330	0
ERS451417_02143	1717.62.peg.2165	NA	NA	NA	1	38	Cargentoratense_DSM44202,"Catypicum_R2070","Caurimucosum_ATCC700975","Cbelfantii_FRC0043","Ccallunae_DSM20147","Ccamporealensis_DSM44610","Cdeserti_GIMN1010","Cdiphtheriae_NCTC11397","Cdoosanense_DSM45436","Cefficiens_YS314","Cepidermidicanis_DSM45586","Cfalsenii_DSM44353","Cglutamicum_ATCC13032","Cglycinophilum_AJ3170","Chalotolerans_YIM70093","Chumireducens_DSM45392","Cimitans_DSM44264","Cjeike…	0.115098	0.115098	1.55941	0.115098	0.115098	1.55941	3074	2	1. 0.50411;2. 386;3. 1156;4. 436;5. 436;6. 1306;7. 533;8. 1597;9. 904;10. G;11. GGC	1. 0.42431;2. 388;3. 1162;4. 438;5. 438;6. 1312;7. 535;8. 1603;9. 910;10. A;11. GCA
ERS451417_01582	1717.62.peg.1591	NA	NA	NA	1	37	Cargentoratense_DSM44202,"Catypicum_R2070","Caurimucosum_ATCC700975","Cbelfantii_FRC0043","Ccallunae_DSM20147","Ccamporealensis_DSM44610","Cdeserti_GIMN1010","Cdiphtheriae_NCTC11397","Cdoosanense_DSM45436","Cefficiens_YS314","Cepidermidicanis_DSM45586","Cfalsenii_DSM44353","Cglutamicum_ATCC13032","Cglycinophilum_AJ3170","Chalotolerans_YIM70093","Chumireducens_DSM45392","Cimitans_DSM44264","Cjeike…	0.182131	0.144578	1.63529	0.182121	0.144577	1.63529	1026	3	1. 0.62173;2. 44;3. 130;4. 51;5. 51;6. 151;7. 56;8. 166;9. 94;10. E;11. GAG	1. 0.41817;2. 73;3. 217;4. 80;5. 80;6. 238;7. 85;8. 253;9. 181;10. E;11. GAG	1. 0.59781;2. 160;3. 478;4. 167;5. 167;6. 499;7. 172;8. 514;9. 442;10. L;11. CTT
ERS451417_01162	1717.62.peg.1173	NA	NA	NA	1	37	Cargentoratense_DSM44202,"Catypicum_R2070","Caurimucosum_ATCC700975","Cbelfantii_FRC0043","Ccallunae_DSM20147","Ccamporealensis_DSM44610","Cdeserti_GIMN1010","Cdiphtheriae_NCTC11397","Cdoosanense_DSM45436","Cefficiens_YS314","Cepidermidicanis_DSM45586","Cfalsenii_DSM44353","Cglutamicum_ATCC13032","Cglycinophilum_AJ3170","Chalotolerans_YIM70093","Chumireducens_DSM45392","Cimitans_DSM44264","Cjeike…	0.121344	0.121344	1.94936	0.121344	0.121344	1.94936	1282	0
ERS451417_00671	1717.62.peg.678	NA	NA	NA	1	16	Cargentoratense_DSM44202,"Cbelfantii_FRC0043","Cdiphtheriae_NCTC11397","Cefficiens_YS314","Cepidermidicanis_DSM45586","Ckroppenstedtii_DSM44385","Ckutscheri_DSM20755","Clactis_RW25","Cmustelae_DSM45274","Cpseudotuberculosis_31","Cpseudotuberculosis_ATCC19410","Crouxii_FRC0190","Csilvaticum_KL0182","Culcerans_NCTC12077","Culcerans_NCTC7910","Cvitaeruminis_DSM20294"	0.0908722	0.0908722	2.74175	0.0908722	0.0908722	2.74176	258	0
ERS451417_00911	1717.62.peg.918	NA	NA	NA	1	9	Cbelfantii_FRC0043,"Cdiphtheriae_NCTC11397","Ckutscheri_DSM20755","Cpseudotuberculosis_ATCC19410","Crouxii_FRC0190","Csilvaticum_KL0182","Culcerans_NCTC12077","Culcerans_NCTC7910","Cvitaeruminis_DSM20294"	0.268241	0.268241	2.20462	0.384159	0.263939	2.22082	2050	6	1. 0.56907;2. 9;3. 25;4. 14;5. 13;6. 37;7. 14;8. 40;9. 13;10. F;11. TTT	1. 0.49841;2. 124;3. 370;4. 154;5. 138;6. 412;7. 147;8. 439;9. 265;10. G;11. GGC	1. 0.53838;2. 132;3. 394;4. 162;5. 146;6. 436;7. 155;8. 463;9. 289;10. A;11. GCA	1. 0.54851;2. 158;3. 472;4. 188;5. 172;6. 514;7. 181;8. 541;9. 367;10. V;11. GTG	1. 0.45701;2. 164;3. 490;4. 194;5. 178;6. 532;7. 187;8. 559;9. 385;10. A;11. GCT	1. 0.42839;2. 226;3. 676;4. 275;5. 259;6. 775;7. 278;8. 832;9. 481;10. D;11. GAT
ERS451417_00413	1717.62.peg.413	NA	NA	NA	1	13	Catypicum_R2070,"Cbelfantii_FRC0043","Ccamporealensis_DSM44610","Cdiphtheriae_NCTC11397","Cepidermidicanis_DSM45586","Ckutscheri_DSM20755","Cpseudotuberculosis_31","Cpseudotuberculosis_ATCC19410","Crouxii_FRC0190","Csilvaticum_KL0182","Csimulans_PES1","Culcerans_NCTC12077","Culcerans_NCTC7910"	0.0876592	0.0876592	2.24696	0.0876592	0.0876592	2.24697	258	0
ERS451417_01822	1717.62.peg.1827	NA	NA	NA	1	38	Cargentoratense_DSM44202,"Catypicum_R2070","Caurimucosum_ATCC700975","Cbelfantii_FRC0043","Ccallunae_DSM20147","Ccamporealensis_DSM44610","Cdeserti_GIMN1010","Cdiphtheriae_NCTC11397","Cdoosanense_DSM45436","Cefficiens_YS314","Cepidermidicanis_DSM45586","Cfalsenii_DSM44353","Cglutamicum_ATCC13032","Cglycinophilum_AJ3170","Chalotolerans_YIM70093","Chumireducens_DSM45392","Cimitans_DSM44264","Cjeike…	0.0910733	0.0910733	1.87589	0.0910831	0.0910831	1.87589	258	0
ERS451417_00637	1717.62.peg.641	NA	NA	NA	1	38	Catypicum_R2070,"Caurimucosum_ATCC700975","Cbelfantii_FRC0043","Ccallunae_DSM20147","Ccamporealensis_DSM44610","Cdeserti_GIMN1010","Cdiphtheriae_NCTC11397","Cdoosanense_DSM45436","Cefficiens_YS314","Cepidermidicanis_DSM45586","Cfalsenii_DSM44353","Cglutamicum_ATCC13032","Cglycinophilum_AJ3170","Chalotolerans_YIM70093","Chumireducens_DSM45392","Cimitans_DSM44264","Cjeikeium_K41","Ckroppenstedtii_D…	0.141102	0.141102	1.30285	0.141102	0.141102	1.30285	2050	2	1. 0.40755;2. 118;3. 352;4. 134;5. 131;6. 391;7. 132;8. 394;9. 238;10. E;11. GAA	1. 0.59453;2. 165;3. 493;4. 190;5. 178;6. 532;7. 179;8. 535;9. 379;10. V;11. GTG
ERS451417_01361	1717.62.peg.1369	NA	NA	NA	1	38	Cargentoratense_DSM44202,"Catypicum_R2070","Caurimucosum_ATCC700975","Cbelfantii_FRC0043","Ccallunae_DSM20147","Ccamporealensis_DSM44610","Cdeserti_GIMN1010","Cdiphtheriae_NCTC11397","Cdoosanense_DSM45436","Cefficiens_YS314","Cepidermidicanis_DSM45586","Cfalsenii_DSM44353","Cglutamicum_ATCC13032","Cglycinophilum_AJ3170","Chalotolerans_YIM70093","Chumireducens_DSM45392","Cimitans_DSM44264","Cjeike…	0.143223	0.143223	1.76463	0.143223	0.143223	1.76463	258	0
ERS451417_02384	1717.62.peg.2416	NA	NA	NA	1	37	Cargentoratense_DSM44202,"Catypicum_R2070","Caurimucosum_ATCC700975","Cbelfantii_FRC0043","Ccallunae_DSM20147","Ccamporealensis_DSM44610","Cdeserti_GIMN1010","Cdiphtheriae_NCTC11397","Cdoosanense_DSM45436","Cefficiens_YS314","Cepidermidicanis_DSM45586","Cfalsenii_DSM44353","Cglutamicum_ATCC13032","Cglycinophilum_AJ3170","Chalotolerans_YIM70093","Chumireducens_DSM45392","Cimitans_DSM44264","Cjeike…	0.0654881	0.0654881	1.79333	0.0654881	0.0654881	1.79333	1026	1	1. 0.4632;2. 281;3. 841;4. 332;5. 332;6. 994;7. 417;8. 1249;9. 712;10. I;11. ATC
ERS451417_00655	1717.62.peg.660	NA	NA	NA	1	39	Cargentoratense_DSM44202,"Catypicum_R2070","Caurimucosum_ATCC700975","Cbelfantii_FRC0043","Ccallunae_DSM20147","Ccamporealensis_DSM44610","Cdeserti_GIMN1010","Cdiphtheriae_NCTC11397","Cdoosanense_DSM45436","Cefficiens_YS314","Cepidermidicanis_DSM45586","Cfalsenii_DSM44353","Cglutamicum_ATCC13032","Cglycinophilum_AJ3170","Chalotolerans_YIM70093","Chumireducens_DSM45392","Cimitans_DSM44264","Cjeike…	0.130213	0.130213	1.8234	0.130213	0.130213	1.8234	258	0
ERS451417_00766	1717.62.peg.771	NA	NA	NA	1	9	Cbelfantii_FRC0043,"Cdiphtheriae_NCTC11397","Cpseudotuberculosis_31","Cpseudotuberculosis_ATCC19410","Crouxii_FRC0190","Csilvaticum_KL0182","Culcerans_NCTC12077","Culcerans_NCTC7910","Cvitaeruminis_DSM20294"	0.342657	0.342657	3.03149	0.342657	0.342657	3.03149	2	1	1. 0.43138;2. 49;3. 145;4. 109;5. 59;6. 175;7. 62;8. 184;9. 118;10. N;11. AAT
ERS451417_01578	1717.62.peg.1587	NA	NA	NA	1	18	Cbelfantii_FRC0043,"Ccallunae_DSM20147","Cdeserti_GIMN1010","Cdiphtheriae_NCTC11397","Cdoosanense_DSM45436","Cefficiens_YS314","Cepidermidicanis_DSM45586","Cglutamicum_ATCC13032","Chumireducens_DSM45392","Cmarinum_DSM44953","Cmaris_DSM45190","Cmustelae_DSM45274","Cpseudotuberculosis_ATCC19410","Csilvaticum_KL0182","Ctestudinoris_DSM44614","Culcerans_NCTC12077","Culcerans_NCTC7910","Cvitaeruminis_…	0.118069	0.118069	1.59625	0.118069	0.118069	1.59625	2306	0
ERS451417_01450	1717.62.peg.1457	NA	NA	NA	1	33	Cargentoratense_DSM44202,"Catypicum_R2070","Caurimucosum_ATCC700975","Cbelfantii_FRC0043","Ccallunae_DSM20147","Ccamporealensis_DSM44610","Cdeserti_GIMN1010","Cdiphtheriae_NCTC11397","Cdoosanense_DSM45436","Cefficiens_YS314","Cepidermidicanis_DSM45586","Cglutamicum_ATCC13032","Cglycinophilum_AJ3170","Chalotolerans_YIM70093","Chumireducens_DSM45392","Cimitans_DSM44264","Ckroppenstedtii_DSM44385","…	0.184589	0.184589	2.02331	0.184589	0.184589	2.02331	258	0
ERS451417_01416	1717.62.peg.1422	NA	NA	NA	1	35	Cargentoratense_DSM44202,"Catypicum_R2070","Caurimucosum_ATCC700975","Cbelfantii_FRC0043","Ccallunae_DSM20147","Ccamporealensis_DSM44610","Cdeserti_GIMN1010","Cdiphtheriae_NCTC11397","Cdoosanense_DSM45436","Cefficiens_YS314","Cepidermidicanis_DSM45586","Cfalsenii_DSM44353","Cglutamicum_ATCC13032","Cglycinophilum_AJ3170","Chalotolerans_YIM70093","Cimitans_DSM44264","Cjeikeium_K41","Ckroppenstedtii…	0.104812	0.104812	1.45948	0.104812	0.104812	1.45948	1282	0
ERS451417_00514	1717.62.peg.518	NA	NA	NA	1	39	Cargentoratense_DSM44202,"Catypicum_R2070","Caurimucosum_ATCC700975","Cbelfantii_FRC0043","Ccallunae_DSM20147","Ccamporealensis_DSM44610","Cdeserti_GIMN1010","Cdiphtheriae_NCTC11397","Cdoosanense_DSM45436","Cefficiens_YS314","Cepidermidicanis_DSM45586","Cfalsenii_DSM44353","Cglutamicum_ATCC13032","Cglycinophilum_AJ3170","Chalotolerans_YIM70093","Chumireducens_DSM45392","Cimitans_DSM44264","Cjeike…	0.115303	0.115303	1.80298	0.115303	0.115303	1.80298	2	1	1. 0.61962;2. 67;3. 199;4. 77;5. 77;6. 229;7. 93;8. 277;9. 142;10. S;11. TCC
ERS451417_01566	1717.62.peg.1575	NA	NA	NA	1	39	Cargentoratense_DSM44202,"Catypicum_R2070","Caurimucosum_ATCC700975","Cbelfantii_FRC0043","Ccallunae_DSM20147","Ccamporealensis_DSM44610","Cdeserti_GIMN1010","Cdiphtheriae_NCTC11397","Cdoosanense_DSM45436","Cefficiens_YS314","Cepidermidicanis_DSM45586","Cfalsenii_DSM44353","Cglutamicum_ATCC13032","Cglycinophilum_AJ3170","Chalotolerans_YIM70093","Chumireducens_DSM45392","Cimitans_DSM44264","Cjeike…	0.140457	0.140457	2.54742	0.140457	0.140457	2.54742	258	0
ERS451417_00746	1717.62.peg.749	NA	NA	NA	1	39	Cargentoratense_DSM44202,"Catypicum_R2070","Caurimucosum_ATCC700975","Cbelfantii_FRC0043","Ccallunae_DSM20147","Ccamporealensis_DSM44610","Cdeserti_GIMN1010","Cdiphtheriae_NCTC11397","Cdoosanense_DSM45436","Cefficiens_YS314","Cepidermidicanis_DSM45586","Cfalsenii_DSM44353","Cglutamicum_ATCC13032","Cglycinophilum_AJ3170","Chalotolerans_YIM70093","Chumireducens_DSM45392","Cimitans_DSM44264","Cjeike…	0.199647	0.199647	1.67237	0.199647	0.199647	1.67238	258	0
ERS451417_01830	1717.62.peg.1834	NA	NA	NA	1	36	Cargentoratense_DSM44202,"Catypicum_R2070","Caurimucosum_ATCC700975","Cbelfantii_FRC0043","Ccallunae_DSM20147","Ccamporealensis_DSM44610","Cdeserti_GIMN1010","Cdiphtheriae_NCTC11397","Cdoosanense_DSM45436","Cefficiens_YS314","Cepidermidicanis_DSM45586","Cfalsenii_DSM44353","Cglutamicum_ATCC13032","Cglycinophilum_AJ3170","Chalotolerans_YIM70093","Chumireducens_DSM45392","Cimitans_DSM44264","Cjeike…	0.172574	0.172574	1.66684	0.172574	0.172574	1.66684	3074	1	1. 0.55983;2. 241;3. 721;4. 284;5. 268;6. 802;7. 294;8. 880;9. 547;10. M;11. ATG
ERS451417_01851	1717.62.peg.1853	NA	NA	NA	1	38	Cargentoratense_DSM44202,"Catypicum_R2070","Caurimucosum_ATCC700975","Cbelfantii_FRC0043","Ccallunae_DSM20147","Ccamporealensis_DSM44610","Cdeserti_GIMN1010","Cdiphtheriae_NCTC11397","Cdoosanense_DSM45436","Cefficiens_YS314","Cepidermidicanis_DSM45586","Cfalsenii_DSM44353","Cglutamicum_ATCC13032","Cglycinophilum_AJ3170","Chalotolerans_YIM70093","Chumireducens_DSM45392","Cimitans_DSM44264","Cjeike…	0.16089	0.16089	1.77805	0.16089	0.16089	1.77806	258	0
ERS451417_00815	1717.62.peg.821	NA	NA	NA	1	31	Catypicum_R2070,"Caurimucosum_ATCC700975","Cbelfantii_FRC0043","Ccallunae_DSM20147","Ccamporealensis_DSM44610","Cdeserti_GIMN1010","Cdiphtheriae_NCTC11397","Cefficiens_YS314","Cepidermidicanis_DSM45586","Cfalsenii_DSM44353","Cglutamicum_ATCC13032","Cglycinophilum_AJ3170","Chalotolerans_YIM70093","Chumireducens_DSM45392","Cimitans_DSM44264","Cjeikeium_K41","Cmarinum_DSM44953","Cmustelae_DSM45274",…	0.129117	0.129117	1.92415	0.129117	0.129117	1.92415	3074	1	1. 0.61379;2. 477;3. 1429;4. 505;5. 505;6. 1513;7. 651;8. 1951;9. 1117;10. R;11. CGA
ERS451417_00947	1717.62.peg.954	NA	NA	NA	1	39	Cargentoratense_DSM44202,"Catypicum_R2070","Caurimucosum_ATCC700975","Cbelfantii_FRC0043","Ccallunae_DSM20147","Ccamporealensis_DSM44610","Cdeserti_GIMN1010","Cdiphtheriae_NCTC11397","Cdoosanense_DSM45436","Cefficiens_YS314","Cepidermidicanis_DSM45586","Cfalsenii_DSM44353","Cglutamicum_ATCC13032","Cglycinophilum_AJ3170","Chalotolerans_YIM70093","Chumireducens_DSM45392","Cimitans_DSM44264","Cjeike…	0.157254	0.157254	1.79401	0.157254	0.157254	1.79401	2	1	1. 0.55527;2. 257;3. 769;4. 279;5. 279;6. 835;7. 284;8. 850;9. 718;10. R;11. CGT
ERS451417_00980	1717.62.peg.990	NA	NA	NA	1	35	Cargentoratense_DSM44202,"Catypicum_R2070","Caurimucosum_ATCC700975","Cbelfantii_FRC0043","Ccallunae_DSM20147","Ccamporealensis_DSM44610","Cdeserti_GIMN1010","Cdiphtheriae_NCTC11397","Cdoosanense_DSM45436","Cefficiens_YS314","Cepidermidicanis_DSM45586","Cfalsenii_DSM44353","Cglutamicum_ATCC13032","Cglycinophilum_AJ3170","Chalotolerans_YIM70093","Chumireducens_DSM45392","Cjeikeium_K41","Ckroppenst…	0.156758	0.156758	1.63846	0.156758	0.156758	1.63846	2306	0
ERS451417_01971	1717.62.peg.1971	NA	NA	NA	1	15	Caurimucosum_ATCC700975,"Cbelfantii_FRC0043","Ccamporealensis_DSM44610","Cdiphtheriae_NCTC11397","Ckutscheri_DSM20755","Cmustelae_DSM45274","Cpseudotuberculosis_31","Cpseudotuberculosis_ATCC19410","Csilvaticum_KL0182","Csimulans_PES1","Csingulare_IBSB52218","Ctestudinoris_DSM44614","Culcerans_NCTC12077","Culcerans_NCTC7910","Cvitaeruminis_DSM20294"	0.208628	0.208628	1.84893	0.208628	0.208628	1.84893	2	4	1. 0.58617;2. 16;3. 46;4. 46;5. 16;6. 46;7. 19;8. 55;9. 16;10. T;11. ACC	1. 0.47208;2. 69;3. 205;4. 99;5. 69;6. 205;7. 72;8. 214;9. 175;10. Q;11. CAG	1. 0.97768;2. 148;3. 442;4. 223;5. 152;6. 454;7. 155;8. 463;9. 388;10. A;11. GCG	1. 0.53936;2. 154;3. 460;4. 229;5. 158;6. 472;7. 161;8. 481;9. 406;10. A;11. GCG
ERS451417_00029	1717.62.peg.26	NA	NA	NA	1	39	Cargentoratense_DSM44202,"Catypicum_R2070","Caurimucosum_ATCC700975","Cbelfantii_FRC0043","Ccallunae_DSM20147","Ccamporealensis_DSM44610","Cdeserti_GIMN1010","Cdiphtheriae_NCTC11397","Cdoosanense_DSM45436","Cefficiens_YS314","Cepidermidicanis_DSM45586","Cfalsenii_DSM44353","Cglutamicum_ATCC13032","Cglycinophilum_AJ3170","Chalotolerans_YIM70093","Chumireducens_DSM45392","Cimitans_DSM44264","Cjeike…	0.662524	0.234253	2.05298	0.374992	0.234253	2.05298	258	0
ERS451417_02379	1717.62.peg.2410	NA	NA	NA	1	31	Cargentoratense_DSM44202,"Catypicum_R2070","Caurimucosum_ATCC700975","Cbelfantii_FRC0043","Ccallunae_DSM20147","Ccamporealensis_DSM44610","Cdeserti_GIMN1010","Cdiphtheriae_NCTC11397","Cdoosanense_DSM45436","Cefficiens_YS314","Cepidermidicanis_DSM45586","Cglutamicum_ATCC13032","Chalotolerans_YIM70093","Chumireducens_DSM45392","Cimitans_DSM44264","Ckutscheri_DSM20755","Cmarinum_DSM44953","Cmaris_DS…	0.16431	0.16431	1.89558	0.16431	0.16431	1.89558	2	1	1. 0.543;2. 121;3. 361;4. 151;5. 133;6. 397;7. 144;8. 430;9. 298;10. K;11. AAA
ERS451417_01161	1717.62.peg.1172	NA	NA	NA	1	37	Cargentoratense_DSM44202,"Caurimucosum_ATCC700975","Cbelfantii_FRC0043","Ccallunae_DSM20147","Ccamporealensis_DSM44610","Cdeserti_GIMN1010","Cdiphtheriae_NCTC11397","Cdoosanense_DSM45436","Cefficiens_YS314","Cepidermidicanis_DSM45586","Cfalsenii_DSM44353","Cglutamicum_ATCC13032","Cglycinophilum_AJ3170","Chalotolerans_YIM70093","Chumireducens_DSM45392","Cimitans_DSM44264","Cjeikeium_K41","Ckroppen…	0.221355	0.221355	1.37812	0.221355	0.221355	1.37812	1282	0
ERS451417_00753	1717.62.peg.758	NA	NA	NA	1	39	Cargentoratense_DSM44202,"Catypicum_R2070","Caurimucosum_ATCC700975","Cbelfantii_FRC0043","Ccallunae_DSM20147","Ccamporealensis_DSM44610","Cdeserti_GIMN1010","Cdiphtheriae_NCTC11397","Cdoosanense_DSM45436","Cefficiens_YS314","Cepidermidicanis_DSM45586","Cfalsenii_DSM44353","Cglutamicum_ATCC13032","Cglycinophilum_AJ3170","Chalotolerans_YIM70093","Chumireducens_DSM45392","Cimitans_DSM44264","Cjeike…	0.363751	0.10568	2.60261	0.10568	0.10568	2.60468	258	0
ERS451417_00722	1717.62.peg.727	NA	NA	NA	1	19	Caurimucosum_ATCC700975,"Cbelfantii_FRC0043","Ccamporealensis_DSM44610","Cdiphtheriae_NCTC11397","Cfalsenii_DSM44353","Cglycinophilum_AJ3170","Ckroppenstedtii_DSM44385","Ckutscheri_DSM20755","Cmustelae_DSM45274","Cpseudotuberculosis_31","Cpseudotuberculosis_ATCC19410","Crouxii_FRC0190","Csilvaticum_KL0182","Csimulans_PES1","Csingulare_IBSB52218","Cterpenotabidum_Y11","Culcerans_NCTC12077","Culcer…	0.0813354	0.0813354	1.99226	0.0813354	0.0813354	1.99226	2	1	1. 0.53321;2. 177;3. 529;4. 203;5. 203;6. 607;7. 259;8. 775;9. 451;10. L;11. CTT
ERS451417_01180	1717.62.peg.1189	NA	NA	NA	1	39	Cargentoratense_DSM44202,"Catypicum_R2070","Caurimucosum_ATCC700975","Cbelfantii_FRC0043","Ccallunae_DSM20147","Ccamporealensis_DSM44610","Cdeserti_GIMN1010","Cdiphtheriae_NCTC11397","Cdoosanense_DSM45436","Cefficiens_YS314","Cepidermidicanis_DSM45586","Cfalsenii_DSM44353","Cglutamicum_ATCC13032","Cglycinophilum_AJ3170","Chalotolerans_YIM70093","Chumireducens_DSM45392","Cimitans_DSM44264","Cjeike…	0.221505	0.221505	1.71899	0.221505	0.221505	1.71899	2050	1	1. 0.55454;2. 299;3. 895;4. 313;5. 313;6. 937;7. 340;8. 1018;9. 703;10. N;11. AAC
ERS451417_00462	1717.62.peg.466	NA	NA	NA	1	39	Cargentoratense_DSM44202,"Catypicum_R2070","Caurimucosum_ATCC700975","Cbelfantii_FRC0043","Ccallunae_DSM20147","Ccamporealensis_DSM44610","Cdeserti_GIMN1010","Cdiphtheriae_NCTC11397","Cdoosanense_DSM45436","Cefficiens_YS314","Cepidermidicanis_DSM45586","Cfalsenii_DSM44353","Cglutamicum_ATCC13032","Cglycinophilum_AJ3170","Chalotolerans_YIM70093","Chumireducens_DSM45392","Cimitans_DSM44264","Cjeike…	0.17386	0.17386	1.33348	0.17387	0.17387	1.33348	258	0
ERS451417_01589	1717.62.peg.1598	NA	NA	NA	1	4	Cdiphtheriae_NCTC11397,"Csilvaticum_KL0182","Culcerans_NCTC12077","Culcerans_NCTC7910"	0.123504	0.11413	1.63845	0.11413	0.11413	1.63842	258	0
ERS451417_00221	1717.62.peg.218	NA	NA	NA	1	10	Cbelfantii_FRC0043,"Cdiphtheriae_NCTC11397","Ckutscheri_DSM20755","Cpseudotuberculosis_31","Cpseudotuberculosis_ATCC19410","Crouxii_FRC0190","Csilvaticum_KL0182","Culcerans_NCTC12077","Culcerans_NCTC7910","Cvitaeruminis_DSM20294"	0.0842599	0.0842599	2.41012	0.0842599	0.0842599	2.41012	2050	1	1. 0.43937;2. 110;3. 328;4. 157;5. 124;6. 370;7. 125;8. 373;9. 283;10. N;11. AAC
ERS451417_01520	1717.62.peg.1529	NA	NA	NA	1	15	Cargentoratense_DSM44202,"Cbelfantii_FRC0043","Cdiphtheriae_NCTC11397","Cefficiens_YS314","Cepidermidicanis_DSM45586","Ckroppenstedtii_DSM44385","Ckutscheri_DSM20755","Clactis_RW25","Cmustelae_DSM45274","Cpseudotuberculosis_31","Cpseudotuberculosis_ATCC19410","Csilvaticum_KL0182","Culcerans_NCTC12077","Culcerans_NCTC7910","Cvitaeruminis_DSM20294"	0.211458	0.211458	2.23113	0.211458	0.211458	2.23113	3330	0
ERS451417_01599	1717.62.peg.1608	NA	NA	NA	1	27	Catypicum_R2070,"Cbelfantii_FRC0043","Ccallunae_DSM20147","Ccamporealensis_DSM44610","Cdeserti_GIMN1010","Cdiphtheriae_NCTC11397","Cdoosanense_DSM45436","Cefficiens_YS314","Cepidermidicanis_DSM45586","Cglutamicum_ATCC13032","Chalotolerans_YIM70093","Chumireducens_DSM45392","Cimitans_DSM44264","Ckutscheri_DSM20755","Cmarinum_DSM44953","Cpseudotuberculosis_31","Cpseudotuberculosis_ATCC19410","Crieg…	0.396805	0.396805	1.80413	0.396805	0.396805	1.80413	3074	1	1. 0.49531;2. 55;3. 163;4. 79;5. 59;6. 175;7. 62;8. 184;9. 121;10. I;11. ATC
ERS451417_00466	1717.62.peg.470	NA	NA	NA	1	12	Cbelfantii_FRC0043,"Cdiphtheriae_NCTC11397","Ckutscheri_DSM20755","Cmustelae_DSM45274","Cpseudotuberculosis_31","Cpseudotuberculosis_ATCC19410","Crouxii_FRC0190","Csilvaticum_KL0182","Culcerans_NCTC12077","Culcerans_NCTC7910","Cuterequi_DSM45634","Cvitaeruminis_DSM20294"	0.232035	0.232035	1.85534	0.232035	0.232035	1.85534	3330	0
ERS451417_01501	1717.62.peg.1509	NA	NA	NA	1	38	Cargentoratense_DSM44202,"Catypicum_R2070","Caurimucosum_ATCC700975","Cbelfantii_FRC0043","Ccallunae_DSM20147","Ccamporealensis_DSM44610","Cdeserti_GIMN1010","Cdiphtheriae_NCTC11397","Cdoosanense_DSM45436","Cefficiens_YS314","Cepidermidicanis_DSM45586","Cfalsenii_DSM44353","Cglutamicum_ATCC13032","Cglycinophilum_AJ3170","Chalotolerans_YIM70093","Chumireducens_DSM45392","Cimitans_DSM44264","Cjeike…	0.0768264	0.0768264	1.36872	0.0768264	0.0768264	1.36872	1026	2	1. 0.47669;2. 10;3. 28;4. 39;5. 39;6. 115;7. 39;8. 115;9. 19;10. L;11. CTA	1. 0.57629;2. 59;3. 175;4. 89;5. 89;6. 265;7. 89;8. 265;9. 166;10. I;11. ATT
ERS451417_00343	1717.62.peg.346	NA	NA	NA	1	39	Cargentoratense_DSM44202,"Catypicum_R2070","Caurimucosum_ATCC700975","Cbelfantii_FRC0043","Ccallunae_DSM20147","Ccamporealensis_DSM44610","Cdeserti_GIMN1010","Cdiphtheriae_NCTC11397","Cdoosanense_DSM45436","Cefficiens_YS314","Cepidermidicanis_DSM45586","Cfalsenii_DSM44353","Cglutamicum_ATCC13032","Cglycinophilum_AJ3170","Chalotolerans_YIM70093","Chumireducens_DSM45392","Cimitans_DSM44264","Cjeike…	0.0714526	0.0714526	2.23023	0.0714526	0.0714526	2.23023	1282	0
ERS451417_02295	1717.62.peg.2324	NA	NA	NA	1	8	Cbelfantii_FRC0043,"Cdiphtheriae_NCTC11397","Cpseudotuberculosis_31","Cpseudotuberculosis_ATCC19410","Csilvaticum_KL0182","Culcerans_NCTC12077","Culcerans_NCTC7910","Cvitaeruminis_DSM20294"	0.133326	0.133326	3.06857	0.133326	0.133326	3.06857	2306	0
ERS451417_01012	1717.62.peg.1023	NA	NA	NA	1	30	Cargentoratense_DSM44202,"Caurimucosum_ATCC700975","Cbelfantii_FRC0043","Ccallunae_DSM20147","Ccamporealensis_DSM44610","Cdeserti_GIMN1010","Cdiphtheriae_NCTC11397","Cdoosanense_DSM45436","Cefficiens_YS314","Cglutamicum_ATCC13032","Chalotolerans_YIM70093","Chumireducens_DSM45392","Cimitans_DSM44264","Ckutscheri_DSM20755","Cmarinum_DSM44953","Cmaris_DSM45190","Cmustelae_DSM45274","Cpseudotuberculo…	0.143885	0.143885	1.54686	0.143885	0.143885	1.54686	2050	2	1. 0.52865;2. 304;3. 910;4. 373;5. 327;6. 979;7. 357;8. 1069;9. 652;10. G;11. GGC	1. 0.49024;2. 305;3. 913;4. 374;5. 328;6. 982;7. 358;8. 1072;9. 655;10. H;11. CAC
ERS451417_00944	1717.62.peg.951	NA	NA	NA	1	39	Cargentoratense_DSM44202,"Catypicum_R2070","Caurimucosum_ATCC700975","Cbelfantii_FRC0043","Ccallunae_DSM20147","Ccamporealensis_DSM44610","Cdeserti_GIMN1010","Cdiphtheriae_NCTC11397","Cdoosanense_DSM45436","Cefficiens_YS314","Cepidermidicanis_DSM45586","Cfalsenii_DSM44353","Cglutamicum_ATCC13032","Cglycinophilum_AJ3170","Chalotolerans_YIM70093","Chumireducens_DSM45392","Cimitans_DSM44264","Cjeike…	0.163295	0.163295	1.64797	0.163295	0.163295	1.64797	2	1	1. 0.48036;2. 182;3. 544;4. 206;5. 206;6. 616;7. 232;8. 694;9. 490;10. V;11. GTG
ERS451417_00699	1717.62.peg.703	NA	NA	NA	1	25	Catypicum_R2070,"Caurimucosum_ATCC700975","Cbelfantii_FRC0043","Ccallunae_DSM20147","Ccamporealensis_DSM44610","Cdeserti_GIMN1010","Cdiphtheriae_NCTC11397","Cefficiens_YS314","Cepidermidicanis_DSM45586","Cglutamicum_ATCC13032","Cglycinophilum_AJ3170","Chalotolerans_YIM70093","Chumireducens_DSM45392","Cmarinum_DSM44953","Cmustelae_DSM45274","Cpseudotuberculosis_31","Cpseudotuberculosis_ATCC19410",…	0.133559	0.127037	1.67295	0.133549	0.127027	1.67295	2	2	1. 0.41487;2. 115;3. 343;4. 130;5. 120;6. 358;7. 129;8. 385;9. 250;10. P;11. CCC	1. 0.66653;2. 143;3. 427;4. 159;5. 148;6. 442;7. 158;8. 472;9. 307;10. T;11. ACC
ERS451417_02316	1717.62.peg.2343	NA	NA	NA	1	17	Cbelfantii_FRC0043,"Ccallunae_DSM20147","Cdeserti_GIMN1010","Cdiphtheriae_NCTC11397","Cefficiens_YS314","Cfalsenii_DSM44353","Cglutamicum_ATCC13032","Cjeikeium_K41","Ckroppenstedtii_DSM44385","Ckutscheri_DSM20755","Cmustelae_DSM45274","Cpseudotuberculosis_31","Cpseudotuberculosis_ATCC19410","Csilvaticum_KL0182","Culcerans_NCTC12077","Culcerans_NCTC7910","Cvitaeruminis_DSM20294"	0.173551	0.173551	2.23746	0.173551	0.173551	2.23745	2306	0
ERS451417_00335	1717.62.peg.337	NA	NA	NA	1	36	Cargentoratense_DSM44202,"Catypicum_R2070","Caurimucosum_ATCC700975","Cbelfantii_FRC0043","Ccallunae_DSM20147","Ccamporealensis_DSM44610","Cdeserti_GIMN1010","Cdiphtheriae_NCTC11397","Cdoosanense_DSM45436","Cefficiens_YS314","Cepidermidicanis_DSM45586","Cglutamicum_ATCC13032","Cglycinophilum_AJ3170","Chalotolerans_YIM70093","Chumireducens_DSM45392","Cimitans_DSM44264","Cjeikeium_K41","Ckroppenste…	0.128455	0.128455	2.30679	0.128455	0.128455	2.30679	3330	0
ERS451417_00529	1717.62.peg.532	NA	NA	NA	1	7	Cbelfantii_FRC0043,"Cdiphtheriae_NCTC11397","Cpseudotuberculosis_ATCC19410","Crouxii_FRC0190","Csilvaticum_KL0182","Culcerans_NCTC12077","Culcerans_NCTC7910"	0.289844	0.289844	3.25353	0.289844	0.289844	3.25353	2306	0
ERS451417_00584	1717.62.peg.588	NA	NA	NA	1	33	Cargentoratense_DSM44202,"Caurimucosum_ATCC700975","Cbelfantii_FRC0043","Ccallunae_DSM20147","Ccamporealensis_DSM44610","Cdeserti_GIMN1010","Cdiphtheriae_NCTC11397","Cefficiens_YS314","Cepidermidicanis_DSM45586","Cfalsenii_DSM44353","Cglutamicum_ATCC13032","Chalotolerans_YIM70093","Chumireducens_DSM45392","Cimitans_DSM44264","Cjeikeium_K41","Ckroppenstedtii_DSM44385","Ckutscheri_DSM20755","Clacti…	0.0907226	0.0907226	2.28508	0.0907226	0.0907226	2.28508	3330	0
ERS451417_01697	1717.62.peg.1704	NA	NA	NA	1	15	Cargentoratense_DSM44202,"Cbelfantii_FRC0043","Cdiphtheriae_NCTC11397","Cefficiens_YS314","Cepidermidicanis_DSM45586","Ckroppenstedtii_DSM44385","Ckutscheri_DSM20755","Clactis_RW25","Cmustelae_DSM45274","Cpseudotuberculosis_31","Cpseudotuberculosis_ATCC19410","Csilvaticum_KL0182","Culcerans_NCTC12077","Culcerans_NCTC7910","Cvitaeruminis_DSM20294"	0.328316	0.328316	2.1569	0.328316	0.328316	2.1569	3330	0
ERS451417_00907	1717.62.peg.913	NA	NA	NA	1	20	Cargentoratense_DSM44202,"Cbelfantii_FRC0043","Ccallunae_DSM20147","Cdeserti_GIMN1010","Cdiphtheriae_NCTC11397","Cefficiens_YS314","Cepidermidicanis_DSM45586","Cglutamicum_ATCC13032","Chalotolerans_YIM70093","Chumireducens_DSM45392","Cmarinum_DSM44953","Cmaris_DSM45190","Cpseudotuberculosis_31","Cpseudotuberculosis_ATCC19410","Crouxii_FRC0190","Csilvaticum_KL0182","Ctestudinoris_DSM44614","Culcer…	0.204194	0.204194	1.93498	0.204194	0.204194	1.93498	3330	0
ERS451417_02135	1717.62.peg.2155	NA	NA	NA	1	7	Cbelfantii_FRC0043,"Cdiphtheriae_NCTC11397","Cpseudotuberculosis_31","Cpseudotuberculosis_ATCC19410","Csilvaticum_KL0182","Culcerans_NCTC12077","Culcerans_NCTC7910"	0.0965614	0.0965614	2.79045	0.0965614	0.0965614	2.79045	258	0
ERS451417_00740	1717.62.peg.743	NA	NA	NA	1	34	Cargentoratense_DSM44202,"Catypicum_R2070","Caurimucosum_ATCC700975","Cbelfantii_FRC0043","Ccamporealensis_DSM44610","Cdeserti_GIMN1010","Cdiphtheriae_NCTC11397","Cdoosanense_DSM45436","Cefficiens_YS314","Cepidermidicanis_DSM45586","Cfalsenii_DSM44353","Cglutamicum_ATCC13032","Cglycinophilum_AJ3170","Chalotolerans_YIM70093","Chumireducens_DSM45392","Cimitans_DSM44264","Cjeikeium_K41","Clactis_RW2…	0.362849	0.362849	1.75061	0.362849	0.362849	1.75061	3330	0
ERS451417_01473	1717.62.peg.1483	NA	NA	NA	1	38	Cargentoratense_DSM44202,"Catypicum_R2070","Caurimucosum_ATCC700975","Cbelfantii_FRC0043","Ccallunae_DSM20147","Ccamporealensis_DSM44610","Cdeserti_GIMN1010","Cdiphtheriae_NCTC11397","Cdoosanense_DSM45436","Cefficiens_YS314","Cepidermidicanis_DSM45586","Cfalsenii_DSM44353","Cglutamicum_ATCC13032","Cglycinophilum_AJ3170","Chalotolerans_YIM70093","Chumireducens_DSM45392","Cimitans_DSM44264","Cjeike…	0.0558929	0.0558929	1.98945	0.0558929	0.0558929	1.98945	1282	0
ERS451417_02030	1717.62.peg.2035	NA	NA	NA	1	38	Cargentoratense_DSM44202,"Catypicum_R2070","Caurimucosum_ATCC700975","Cbelfantii_FRC0043","Ccallunae_DSM20147","Ccamporealensis_DSM44610","Cdeserti_GIMN1010","Cdiphtheriae_NCTC11397","Cdoosanense_DSM45436","Cefficiens_YS314","Cepidermidicanis_DSM45586","Cfalsenii_DSM44353","Cglutamicum_ATCC13032","Cglycinophilum_AJ3170","Chalotolerans_YIM70093","Chumireducens_DSM45392","Cimitans_DSM44264","Cjeike…	0.0738367	0.0738367	1.60277	0.0738367	0.0738367	1.60277	258	0
ERS451417_00217	1717.62.peg.214	NA	NA	NA	1	11	Cbelfantii_FRC0043,"Cdiphtheriae_NCTC11397","Ckutscheri_DSM20755","Cmustelae_DSM45274","Cpseudotuberculosis_31","Cpseudotuberculosis_ATCC19410","Crouxii_FRC0190","Csilvaticum_KL0182","Culcerans_NCTC12077","Culcerans_NCTC7910","Cvitaeruminis_DSM20294"	0.148503	0.148503	2.1264	0.148503	0.148503	2.1264	258	0
ERS451417_01588	1717.62.peg.1597	NA	NA	NA	1	36	Cargentoratense_DSM44202,"Caurimucosum_ATCC700975","Cbelfantii_FRC0043","Ccallunae_DSM20147","Ccamporealensis_DSM44610","Cdeserti_GIMN1010","Cdiphtheriae_NCTC11397","Cdoosanense_DSM45436","Cefficiens_YS314","Cepidermidicanis_DSM45586","Cfalsenii_DSM44353","Cglutamicum_ATCC13032","Cglycinophilum_AJ3170","Chalotolerans_YIM70093","Chumireducens_DSM45392","Cimitans_DSM44264","Cjeikeium_K41","Ckroppen…	0.223229	0.223229	1.61054	0.223229	0.223229	1.61054	2	3	1. 0.65738;2. 184;3. 550;4. 204;5. 204;6. 610;7. 224;8. 670;9. 439;10. T;11. ACT	1. 0.58099;2. 232;3. 694;4. 257;5. 257;6. 769;7. 290;8. 868;9. 547;10. L;11. TTG	1. 0.72383;2. 294;3. 880;4. 319;5. 319;6. 955;7. 352;8. 1054;9. 733;10. V;11. GTC
ERS451417_01224	1717.62.peg.1232	NA	NA	NA	1	26	Catypicum_R2070,"Cbelfantii_FRC0043","Ccallunae_DSM20147","Cdeserti_GIMN1010","Cdiphtheriae_NCTC11397","Cdoosanense_DSM45436","Cefficiens_YS314","Cepidermidicanis_DSM45586","Cglutamicum_ATCC13032","Chalotolerans_YIM70093","Chumireducens_DSM45392","Cimitans_DSM44264","Ckutscheri_DSM20755","Cmarinum_DSM44953","Cmaris_DSM45190","Cmustelae_DSM45274","Cpseudotuberculosis_ATCC19410","CriegeliiPUDD83A45…	0.228747	0.228747	1.45753	0.228747	0.228747	1.45753	258	0
ERS451417_00349	1717.62.peg.352	NA	NA	NA	1	13	Cbelfantii_FRC0043,"Cdiphtheriae_NCTC11397","Cepidermidicanis_DSM45586","Ckroppenstedtii_DSM44385","Clactis_RW25","Cpseudotuberculosis_31","Cpseudotuberculosis_ATCC19410","Crouxii_FRC0190","Csilvaticum_KL0182","Csimulans_PES1","Ctestudinoris_DSM44614","Culcerans_NCTC12077","Culcerans_NCTC7910"	0.111449	0.111449	1.89179	0.111449	0.111449	1.89179	2	2	1. 0.49776;2. 35;3. 103;4. 40;5. 40;6. 118;7. 41;8. 121;9. 82;10. K;11. AAA	1. 0.55361;2. 114;3. 340;4. 119;5. 119;6. 355;7. 120;8. 358;9. 319;10. T;11. ACC
ERS451417_01934	1717.62.peg.1931	NA	NA	NA	1	22	Catypicum_R2070,"Caurimucosum_ATCC700975","Cbelfantii_FRC0043","Ccallunae_DSM20147","Ccamporealensis_DSM44610","Cdeserti_GIMN1010","Cdiphtheriae_NCTC11397","Cefficiens_YS314","Cglutamicum_ATCC13032","Chalotolerans_YIM70093","Chumireducens_DSM45392","Ckutscheri_DSM20755","Cmustelae_DSM45274","Cpseudotuberculosis_31","Cpseudotuberculosis_ATCC19410","Csilvaticum_KL0182","Csimulans_PES1","Csingulare_…	0.308936	0.308936	2.51963	0.308936	0.308936	2.51963	3074	2	1. 0.40505;2. 313;3. 937;4. 387;5. 364;6. 1090;7. 415;8. 1243;9. 730;10. V;11. GTG	1. 0.50136;2. 323;3. 967;4. 397;5. 374;6. 1120;7. 425;8. 1273;9. 760;10. E;11. GAG
ERS451417_02070	1717.62.peg.2082	NA	NA	NA	1	7	Cbelfantii_FRC0043,"Cdiphtheriae_NCTC11397","Cpseudotuberculosis_31","Cpseudotuberculosis_ATCC19410","Csilvaticum_KL0182","Culcerans_NCTC12077","Culcerans_NCTC7910"	0.115752	0.115752	2.40918	0.115752	0.115752	2.40918	2050	2	1. 0.50066;2. 50;3. 148;4. 57;5. 52;6. 154;7. 55;8. 163;9. 16;10. M;11. ATG	1. 0.40939;2. 126;3. 376;4. 144;5. 128;6. 382;7. 131;8. 391;9. 244;10. P;11. CCA
ERS451417_01654	1717.62.peg.1661	NA	NA	NA	1	38	Cargentoratense_DSM44202,"Catypicum_R2070","Caurimucosum_ATCC700975","Cbelfantii_FRC0043","Ccallunae_DSM20147","Ccamporealensis_DSM44610","Cdeserti_GIMN1010","Cdiphtheriae_NCTC11397","Cdoosanense_DSM45436","Cefficiens_YS314","Cepidermidicanis_DSM45586","Cfalsenii_DSM44353","Cglutamicum_ATCC13032","Cglycinophilum_AJ3170","Chalotolerans_YIM70093","Chumireducens_DSM45392","Cimitans_DSM44264","Cjeike…	0.137614	0.137604	1.73597	0.137604	0.137604	1.73597	2	4	1. 0.54518;2. 64;3. 190;4. 64;5. 64;6. 190;7. 64;8. 190;9. 106;10. R;11. CGA	1. 0.49779;2. 223;3. 667;4. 235;5. 235;6. 703;7. 236;8. 706;9. 559;10. V;11. GTC	1. 0.52796;2. 291;3. 871;4. 303;5. 303;6. 907;7. 304;8. 910;9. 763;10. N;11. AAT	1. 0.40121;2. 325;3. 973;4. 337;5. 337;6. 1009;7. 338;8. 1012;9. 865;10. I;11. ATT
ERS451417_00495	1717.62.peg.498	NA	NA	NA	1	39	Cargentoratense_DSM44202,"Catypicum_R2070","Caurimucosum_ATCC700975","Cbelfantii_FRC0043","Ccallunae_DSM20147","Ccamporealensis_DSM44610","Cdeserti_GIMN1010","Cdiphtheriae_NCTC11397","Cdoosanense_DSM45436","Cefficiens_YS314","Cepidermidicanis_DSM45586","Cfalsenii_DSM44353","Cglutamicum_ATCC13032","Cglycinophilum_AJ3170","Chalotolerans_YIM70093","Chumireducens_DSM45392","Cimitans_DSM44264","Cjeike…	0.147202	0.147202	2.07607	0.147202	0.147202	2.07607	258	0
ERS451417_01327	1717.62.peg.1335	NA	NA	NA	1	38	Cargentoratense_DSM44202,"Catypicum_R2070","Caurimucosum_ATCC700975","Cbelfantii_FRC0043","Ccallunae_DSM20147","Ccamporealensis_DSM44610","Cdeserti_GIMN1010","Cdiphtheriae_NCTC11397","Cdoosanense_DSM45436","Cefficiens_YS314","Cepidermidicanis_DSM45586","Cfalsenii_DSM44353","Cglutamicum_ATCC13032","Cglycinophilum_AJ3170","Chalotolerans_YIM70093","Chumireducens_DSM45392","Cimitans_DSM44264","Cjeike…	0.155308	0.155308	2.18533	0.155308	0.155308	2.18533	1282	0
ERS451417_00924	1717.62.peg.931	NA	NA	NA	1	23	Catypicum_R2070,"Cbelfantii_FRC0043","Ccallunae_DSM20147","Ccamporealensis_DSM44610","Cdeserti_GIMN1010","Cdiphtheriae_NCTC11397","Cdoosanense_DSM45436","Cefficiens_YS314","Cglutamicum_ATCC13032","Chalotolerans_YIM70093","Chumireducens_DSM45392","Ckutscheri_DSM20755","Clactis_RW25","Cmarinum_DSM44953","Cmustelae_DSM45274","Cpseudotuberculosis_31","Crouxii_FRC0190","Csilvaticum_KL0182","Csimulans_…	0.203645	0.203645	1.97592	0.203645	0.203645	1.97592	2306	0
ERS451417_00984	1717.62.peg.995	NA	NA	NA	1	7	Cbelfantii_FRC0043,"Cdiphtheriae_NCTC11397","Cpseudotuberculosis_31","Cpseudotuberculosis_ATCC19410","Crouxii_FRC0190","Culcerans_NCTC12077","Culcerans_NCTC7910"	0.320425	0.304747	3.38012	0.320425	0.304747	3.38011	4098	2	1. 0.44732;2. 80;3. 238;4. 100;5. 81;6. 241;7. 80;8. 238;9. 202;10. I;11. ATT	1. 0.40549;2. 146;3. 436;4. 171;5. 147;6. 439;7. 146;8. 436;9. 400;10. I;11. ATC
ERS451417_01928	1717.62.peg.1925	NA	NA	NA	1	38	Cargentoratense_DSM44202,"Catypicum_R2070","Caurimucosum_ATCC700975","Cbelfantii_FRC0043","Ccallunae_DSM20147","Ccamporealensis_DSM44610","Cdeserti_GIMN1010","Cdiphtheriae_NCTC11397","Cdoosanense_DSM45436","Cefficiens_YS314","Cepidermidicanis_DSM45586","Cfalsenii_DSM44353","Cglutamicum_ATCC13032","Cglycinophilum_AJ3170","Chalotolerans_YIM70093","Chumireducens_DSM45392","Cimitans_DSM44264","Cjeike…	0.106171	0.106171	1.67338	0.106171	0.106171	1.67338	1282	0
ERS451417_02233	1717.62.peg.2258	NA	NA	NA	1	38	Cargentoratense_DSM44202,"Catypicum_R2070","Caurimucosum_ATCC700975","Cbelfantii_FRC0043","Ccallunae_DSM20147","Ccamporealensis_DSM44610","Cdeserti_GIMN1010","Cdiphtheriae_NCTC11397","Cdoosanense_DSM45436","Cefficiens_YS314","Cepidermidicanis_DSM45586","Cfalsenii_DSM44353","Cglutamicum_ATCC13032","Cglycinophilum_AJ3170","Chalotolerans_YIM70093","Chumireducens_DSM45392","Cimitans_DSM44264","Cjeike…	0.157401	0.157401	1.6488	0.157401	0.157401	1.6488	1282	0
ERS451417_01532	1717.62.peg.1541	NA	NA	NA	1	38	Cargentoratense_DSM44202,"Catypicum_R2070","Caurimucosum_ATCC700975","Cbelfantii_FRC0043","Ccallunae_DSM20147","Ccamporealensis_DSM44610","Cdeserti_GIMN1010","Cdiphtheriae_NCTC11397","Cdoosanense_DSM45436","Cefficiens_YS314","Cepidermidicanis_DSM45586","Cfalsenii_DSM44353","Cglutamicum_ATCC13032","Cglycinophilum_AJ3170","Chalotolerans_YIM70093","Chumireducens_DSM45392","Cimitans_DSM44264","Cjeike…	0.195633	0.195633	1.46507	0.195642	0.195642	1.46507	258	0
ERS451417_00716	1717.62.peg.721	NA	NA	NA	1	31	Cargentoratense_DSM44202,"Caurimucosum_ATCC700975","Cbelfantii_FRC0043","Ccallunae_DSM20147","Ccamporealensis_DSM44610","Cdeserti_GIMN1010","Cdiphtheriae_NCTC11397","Cefficiens_YS314","Cepidermidicanis_DSM45586","Cfalsenii_DSM44353","Cglycinophilum_AJ3170","Chalotolerans_YIM70093","Chumireducens_DSM45392","Cimitans_DSM44264","Cjeikeium_K41","Cmarinum_DSM44953","Cmaris_DSM45190","Cmustelae_DSM4527…	0.176453	0.176453	1.69648	0.176453	0.176453	1.69648	3330	0
ERS451417_01226	1717.62.peg.1234	NA	NA	NA	1	39	Cargentoratense_DSM44202,"Catypicum_R2070","Caurimucosum_ATCC700975","Cbelfantii_FRC0043","Ccallunae_DSM20147","Ccamporealensis_DSM44610","Cdeserti_GIMN1010","Cdiphtheriae_NCTC11397","Cdoosanense_DSM45436","Cefficiens_YS314","Cepidermidicanis_DSM45586","Cfalsenii_DSM44353","Cglutamicum_ATCC13032","Cglycinophilum_AJ3170","Chalotolerans_YIM70093","Chumireducens_DSM45392","Cimitans_DSM44264","Cjeike…	0.152826	0.152826	2.06803	0.152826	0.152826	2.06803	2306	0
ERS451417_01459	1717.62.peg.1469	NA	NA	NA	1	30	Caurimucosum_ATCC700975,"Ccallunae_DSM20147","Ccamporealensis_DSM44610","Cdeserti_GIMN1010","Cdiphtheriae_NCTC11397","Cdoosanense_DSM45436","Cefficiens_YS314","Cepidermidicanis_DSM45586","Cfalsenii_DSM44353","Cglutamicum_ATCC13032","Cglycinophilum_AJ3170","Chalotolerans_YIM70093","Chumireducens_DSM45392","Cimitans_DSM44264","Ckroppenstedtii_DSM44385","Ckutscheri_DSM20755","Clactis_RW25","Cmarinum…	0.173551	0.1731	1.78304	0.173551	0.1731	1.78304	2	2	1. 0.54946;2. 150;3. 448;4. 164;5. 151;6. 451;7. 151;8. 451;9. 439;10. N;11. AAT	1. 0.52911;2. 185;3. 553;4. 199;5. 186;6. 556;7. 186;8. 556;9. 544;10. Q;11. CAG
ERS451417_01550	1717.62.peg.1559	NA	NA	NA	1	31	Cargentoratense_DSM44202,"Catypicum_R2070","Caurimucosum_ATCC700975","Cbelfantii_FRC0043","Ccallunae_DSM20147","Ccamporealensis_DSM44610","Cdeserti_GIMN1010","Cdiphtheriae_NCTC11397","Cdoosanense_DSM45436","Cefficiens_YS314","Cepidermidicanis_DSM45586","Cglutamicum_ATCC13032","Chalotolerans_YIM70093","Chumireducens_DSM45392","Cimitans_DSM44264","Cjeikeium_K41","Ckroppenstedtii_DSM44385","Ckutsche…	0.147002	0.147002	2.17801	0.147002	0.147002	2.17801	258	0
ERS451417_00852	1717.62.peg.857	NA	NA	NA	1	39	Cargentoratense_DSM44202,"Catypicum_R2070","Caurimucosum_ATCC700975","Cbelfantii_FRC0043","Ccallunae_DSM20147","Ccamporealensis_DSM44610","Cdeserti_GIMN1010","Cdiphtheriae_NCTC11397","Cdoosanense_DSM45436","Cefficiens_YS314","Cepidermidicanis_DSM45586","Cfalsenii_DSM44353","Cglutamicum_ATCC13032","Cglycinophilum_AJ3170","Chalotolerans_YIM70093","Chumireducens_DSM45392","Cimitans_DSM44264","Cjeike…	0.125867	0.125867	1.79512	0.125867	0.125867	1.79511	258	0
ERS451417_02273	1717.62.peg.2302	NA	NA	NA	1	15	Caurimucosum_ATCC700975,"Ccamporealensis_DSM44610","Cdiphtheriae_NCTC11397","Ckutscheri_DSM20755","Cmustelae_DSM45274","Cpseudotuberculosis_31","Cpseudotuberculosis_ATCC19410","CriegeliiPUDD83A45","Csilvaticum_KL0182","Csimulans_PES1","Csingulare_IBSB52218","Culcerans_NCTC12077","Culcerans_NCTC7910","Cureicelerivorans_IMMIBRIV2301","Cvitaeruminis_DSM20294"	0.14479	0.14479	1.98714	0.14479	0.14479	1.98714	3074	2	1. 0.51713;2. 159;3. 475;4. 159;5. 159;6. 475;7. 159;8. 475;9. 472;10. F;11. TTC	1. 0.49732;2. 227;3. 679;4. 227;5. 227;6. 679;7. 227;8. 679;9. 676;10. L;11. CTC
ERS451417_00124	1717.62.peg.122	NA	NA	NA	1	14	Cbelfantii_FRC0043,"Ccallunae_DSM20147","Cdiphtheriae_NCTC11397","Cdoosanense_DSM45436","Cefficiens_YS314","Ckroppenstedtii_DSM44385","Ckutscheri_DSM20755","Cpseudotuberculosis_31","Cpseudotuberculosis_ATCC19410","Crouxii_FRC0190","Csilvaticum_KL0182","Culcerans_NCTC12077","Culcerans_NCTC7910","Cvitaeruminis_DSM20294"	0.141794	0.141794	2.17844	0.141794	0.141794	2.17844	3330	0
ERS451417_00701	1717.62.peg.705	NA	NA	NA	1	14	Cbelfantii_FRC0043,"Cdeserti_GIMN1010","Cdiphtheriae_NCTC11397","Chalotolerans_YIM70093","Chumireducens_DSM45392","Cmarinum_DSM44953","Cmustelae_DSM45274","Cpseudotuberculosis_31","Cpseudotuberculosis_ATCC19410","Crouxii_FRC0190","Csilvaticum_KL0182","Ctestudinoris_DSM44614","Culcerans_NCTC12077","Culcerans_NCTC7910"	0.224268	0.224268	1.7535	0.224268	0.224268	1.7535	3074	2	1. 0.56636;2. 426;3. 1276;4. 572;5. 434;6. 1300;7. 504;8. 1510;9. 826;10. N;11. AAC	1. 0.50758;2. 559;3. 1675;4. 767;5. 570;6. 1708;7. 655;8. 1963;9. 1114;10. K;11. AAA
ERS451417_02128	1717.62.peg.2146	NA	NA	NA	1	38	Cargentoratense_DSM44202,"Catypicum_R2070","Caurimucosum_ATCC700975","Cbelfantii_FRC0043","Ccallunae_DSM20147","Ccamporealensis_DSM44610","Cdeserti_GIMN1010","Cdiphtheriae_NCTC11397","Cdoosanense_DSM45436","Cefficiens_YS314","Cepidermidicanis_DSM45586","Cfalsenii_DSM44353","Cglutamicum_ATCC13032","Cglycinophilum_AJ3170","Chalotolerans_YIM70093","Chumireducens_DSM45392","Cimitans_DSM44264","Cjeike…	0.119836	0.119836	1.88452	0.119836	0.119836	1.88452	258	0
ERS451417_00237	1717.62.peg.233	NA	NA	NA	1	13	Caurimucosum_ATCC700975,"Cbelfantii_FRC0043","Cdiphtheriae_NCTC11397","Chalotolerans_YIM70093","Chumireducens_DSM45392","Cmarinum_DSM44953","Cmaris_DSM45190","Cpseudotuberculosis_31","Cpseudotuberculosis_ATCC19410","Crouxii_FRC0190","Csingulare_IBSB52218","Culcerans_NCTC12077","Culcerans_NCTC7910"	0.271783	0.271783	2.01704	0.271783	0.271783	2.01704	6402	0
ERS451417_02386	1717.62.peg.2418	NA	NA	NA	1	38	Cargentoratense_DSM44202,"Catypicum_R2070","Caurimucosum_ATCC700975","Cbelfantii_FRC0043","Ccallunae_DSM20147","Ccamporealensis_DSM44610","Cdeserti_GIMN1010","Cdiphtheriae_NCTC11397","Cdoosanense_DSM45436","Cefficiens_YS314","Cepidermidicanis_DSM45586","Cfalsenii_DSM44353","Cglutamicum_ATCC13032","Cglycinophilum_AJ3170","Chalotolerans_YIM70093","Chumireducens_DSM45392","Cimitans_DSM44264","Cjeike…	0.246037	0.189031	1.58768	0.246027	0.189031	1.58768	1026	4	1. 0.61708;2. 28;3. 82;4. 52;5. 52;6. 154;7. 100;8. 298;9. 58;10. R;11. CGC	1. 0.53197;2. 170;3. 508;4. 232;5. 232;6. 694;7. 290;8. 868;9. 415;10. I;11. ATC	1. 0.58834;2. 197;3. 589;4. 262;5. 262;6. 784;7. 324;8. 970;9. 466;10. I;11. ATC	1. 0.69033;2. 233;3. 697;4. 298;5. 298;6. 892;7. 360;8. 1078;9. 574;10. A;11. GCG
ERS451417_00403	1717.62.peg.403	NA	NA	NA	1	38	Cargentoratense_DSM44202,"Catypicum_R2070","Caurimucosum_ATCC700975","Cbelfantii_FRC0043","Ccallunae_DSM20147","Ccamporealensis_DSM44610","Cdeserti_GIMN1010","Cdiphtheriae_NCTC11397","Cdoosanense_DSM45436","Cefficiens_YS314","Cepidermidicanis_DSM45586","Cfalsenii_DSM44353","Cglutamicum_ATCC13032","Cglycinophilum_AJ3170","Chalotolerans_YIM70093","Chumireducens_DSM45392","Cimitans_DSM44264","Cjeike…	0.406229	0.0943873	1.92006	0.198163	0.0943873	1.92006	258	0
ERS451417_00158	1717.62.peg.156	NA	NA	NA	1	12	Cdiphtheriae_NCTC11397,"Cmustelae_DSM45274","Cpseudotuberculosis_31","Cpseudotuberculosis_ATCC19410","Crouxii_FRC0190","Csilvaticum_KL0182","Csimulans_PES1","Csingulare_IBSB52218","Culcerans_NCTC12077","Culcerans_NCTC7910","Curealyticum_DSM7109","Cvitaeruminis_DSM20294"	0.204881	0.204881	2.27267	0.204881	0.204881	2.27267	3074	2	1. 0.46446;2. 42;3. 124;4. 57;5. 48;6. 142;7. 94;8. 280;9. 16;10. S;11. TCC	1. 0.58282;2. 112;3. 334;4. 130;5. 118;6. 352;7. 164;8. 490;9. 226;10. S;11. TCT
ERS451417_00096	1717.62.peg.94	NA	NA	NA	1	11	Cbelfantii_FRC0043,"Cdiphtheriae_NCTC11397","Chalotolerans_YIM70093","Cmustelae_DSM45274","Cpseudotuberculosis_31","Cpseudotuberculosis_ATCC19410","Crouxii_FRC0190","Csilvaticum_KL0182","Culcerans_NCTC12077","Culcerans_NCTC7910","Cvitaeruminis_DSM20294"	0.132466	0.132466	2.49272	0.132466	0.132466	2.49272	2	3	1. 0.64557;2. 22;3. 64;4. 66;5. 66;6. 196;7. 92;8. 274;9. 22;10. T;11. ACC	1. 0.43867;2. 30;3. 88;4. 74;5. 74;6. 220;7. 100;8. 298;9. 46;10. T;11. ACG	1. 0.60633;2. 84;3. 250;4. 132;5. 132;6. 394;7. 159;8. 475;9. 181;10. V;11. GTG
ERS451417_01715	1717.62.peg.1718	NA	NA	NA	1	38	Cargentoratense_DSM44202,"Catypicum_R2070","Caurimucosum_ATCC700975","Cbelfantii_FRC0043","Ccallunae_DSM20147","Ccamporealensis_DSM44610","Cdeserti_GIMN1010","Cdiphtheriae_NCTC11397","Cdoosanense_DSM45436","Cefficiens_YS314","Cepidermidicanis_DSM45586","Cfalsenii_DSM44353","Cglutamicum_ATCC13032","Cglycinophilum_AJ3170","Chalotolerans_YIM70093","Chumireducens_DSM45392","Cimitans_DSM44264","Cjeike…	0.111617	0.111617	1.78562	0.111617	0.111617	1.78562	2	1	1. 0.48245;2. 59;3. 175;4. 93;5. 93;6. 277;7. 166;8. 496;9. 61;10. Q;11. CAA
ERS451417_00970	1717.62.peg.978	NA	NA	NA	1	11	Cbelfantii_FRC0043,"Cdiphtheriae_NCTC11397","Cepidermidicanis_DSM45586","Ckutscheri_DSM20755","Cpseudotuberculosis_31","Cpseudotuberculosis_ATCC19410","Crouxii_FRC0190","Csilvaticum_KL0182","Ctestudinoris_DSM44614","Culcerans_NCTC12077","Culcerans_NCTC7910"	0.156849	0.156849	3.06407	0.175137	0.155982	3.06598	2	4	1. 0.49569;2. 28;3. 82;4. 69;5. 51;6. 151;7. 55;8. 163;9. 1;10. M;11. ATG	1. 0.51041;2. 32;3. 94;4. 73;5. 55;6. 163;7. 59;8. 175;9. 13;10. V;11. GTC	1. 0.58487;2. 156;3. 466;4. 203;5. 181;6. 541;7. 185;8. 553;9. 358;10. A;11. GCC	1. 0.50455;2. 247;3. 739;4. 294;5. 272;6. 814;7. 276;8. 826;9. 631;10. I;11. ATC
ERS451417_00647	1717.62.peg.652	NA	NA	NA	1	16	Cbelfantii_FRC0043,"Ccallunae_DSM20147","Cdeserti_GIMN1010","Cdiphtheriae_NCTC11397","Cefficiens_YS314","Cglutamicum_ATCC13032","Chalotolerans_YIM70093","Ckutscheri_DSM20755","Cmustelae_DSM45274","Cpseudotuberculosis_31","Cpseudotuberculosis_ATCC19410","Crouxii_FRC0190","Csilvaticum_KL0182","Culcerans_NCTC12077","Culcerans_NCTC7910","Cvitaeruminis_DSM20294"	0.112985	0.112985	2.14912	0.112985	0.112985	2.14912	2	1	1. 0.4685;2. 55;3. 163;4. 85;5. 64;6. 190;7. 63;8. 187;9. 100;10. P;11. CCC
ERS451417_00657	1717.62.peg.662	NA	NA	NA	1	39	Cargentoratense_DSM44202,"Catypicum_R2070","Caurimucosum_ATCC700975","Cbelfantii_FRC0043","Ccallunae_DSM20147","Ccamporealensis_DSM44610","Cdeserti_GIMN1010","Cdiphtheriae_NCTC11397","Cdoosanense_DSM45436","Cefficiens_YS314","Cepidermidicanis_DSM45586","Cfalsenii_DSM44353","Cglutamicum_ATCC13032","Cglycinophilum_AJ3170","Chalotolerans_YIM70093","Chumireducens_DSM45392","Cimitans_DSM44264","Cjeike…	0.151984	0.151984	1.67051	0.151984	0.151984	1.67051	3330	0
ERS451417_00590	1717.62.peg.593	NA	NA	NA	1	14	Cbelfantii_FRC0043,"Ccallunae_DSM20147","Cdeserti_GIMN1010","Cdiphtheriae_NCTC11397","Cefficiens_YS314","Cglutamicum_ATCC13032","Chalotolerans_YIM70093","Cmustelae_DSM45274","Cpseudotuberculosis_ATCC19410","Crouxii_FRC0190","Csilvaticum_KL0182","Culcerans_NCTC12077","Culcerans_NCTC7910","Cvitaeruminis_DSM20294"	0.0727111	0.0727111	2.20081	0.0727111	0.0727111	2.20081	258	0
ERS451417_01539	1717.62.peg.1548	NA	NA	NA	1	38	Cargentoratense_DSM44202,"Catypicum_R2070","Caurimucosum_ATCC700975","Cbelfantii_FRC0043","Ccallunae_DSM20147","Ccamporealensis_DSM44610","Cdeserti_GIMN1010","Cdiphtheriae_NCTC11397","Cdoosanense_DSM45436","Cefficiens_YS314","Cepidermidicanis_DSM45586","Cfalsenii_DSM44353","Cglutamicum_ATCC13032","Cglycinophilum_AJ3170","Chalotolerans_YIM70093","Chumireducens_DSM45392","Cimitans_DSM44264","Cjeike…	0.0418777	0.0418777	1.38682	0.0418777	0.0418777	1.38684	258	0
ERS451417_00633	1717.62.peg.637	NA	NA	NA	1	39	Cargentoratense_DSM44202,"Catypicum_R2070","Caurimucosum_ATCC700975","Cbelfantii_FRC0043","Ccallunae_DSM20147","Ccamporealensis_DSM44610","Cdeserti_GIMN1010","Cdiphtheriae_NCTC11397","Cdoosanense_DSM45436","Cefficiens_YS314","Cepidermidicanis_DSM45586","Cfalsenii_DSM44353","Cglutamicum_ATCC13032","Cglycinophilum_AJ3170","Chalotolerans_YIM70093","Chumireducens_DSM45392","Cimitans_DSM44264","Cjeike…	0.116912	0.116912	1.60465	0.116902	0.116902	1.60465	3330	0
ERS451417_00559	1717.62.peg.563	NA	NA	NA	1	22	Cargentoratense_DSM44202,"Caurimucosum_ATCC700975","Cbelfantii_FRC0043","Cdeserti_GIMN1010","Cdiphtheriae_NCTC11397","Cglutamicum_ATCC13032","Cglycinophilum_AJ3170","Cimitans_DSM44264","Cjeikeium_K41","Ckutscheri_DSM20755","Cmustelae_DSM45274","Cpseudotuberculosis_31","Cpseudotuberculosis_ATCC19410","CriegeliiPUDD83A45","Crouxii_FRC0190","Csilvaticum_KL0182","Csimulans_PES1","Csingulare_IBSB52218…	0.154424	0.154424	2.73359	0.154424	0.154424	2.73359	3330	0
ERS451417_01549	1717.62.peg.1558	NA	NA	NA	1	23	Cargentoratense_DSM44202,"Caurimucosum_ATCC700975","Cbelfantii_FRC0043","Ccallunae_DSM20147","Ccamporealensis_DSM44610","Cdeserti_GIMN1010","Cdiphtheriae_NCTC11397","Cefficiens_YS314","Cglutamicum_ATCC13032","Chalotolerans_YIM70093","Chumireducens_DSM45392","Ckutscheri_DSM20755","Cmarinum_DSM44953","Cpseudotuberculosis_31","Cpseudotuberculosis_ATCC19410","Csilvaticum_KL0182","Csimulans_PES1","Csi…	0.128113	0.128113	1.6419	0.128113	0.128113	1.6419	2050	4	1. 0.52043;2. 35;3. 103;4. 72;5. 72;6. 214;7. 75;8. 223;9. 4;10. A;11. GCT	1. 0.42979;2. 417;3. 1249;4. 464;5. 464;6. 1390;7. 484;8. 1450;9. 1009;10. I;11. ATT	1. 0.53088;2. 459;3. 1375;4. 511;5. 506;6. 1516;7. 526;8. 1576;9. 1135;10. I;11. ATA	1. 0.65939;2. 647;3. 1939;4. 718;5. 713;6. 2137;7. 813;8. 2437;9. 1411;10. K;11. AAA
ERS451417_01324	1717.62.peg.1332	NA	NA	NA	1	37	Cargentoratense_DSM44202,"Catypicum_R2070","Caurimucosum_ATCC700975","Cbelfantii_FRC0043","Ccallunae_DSM20147","Ccamporealensis_DSM44610","Cdeserti_GIMN1010","Cdiphtheriae_NCTC11397","Cdoosanense_DSM45436","Cefficiens_YS314","Cepidermidicanis_DSM45586","Cfalsenii_DSM44353","Cglutamicum_ATCC13032","Cglycinophilum_AJ3170","Chalotolerans_YIM70093","Chumireducens_DSM45392","Cimitans_DSM44264","Cjeike…	0.207663	0.207663	1.77866	0.207663	0.207663	1.77866	3330	0
ERS451417_02390	1717.62.peg.2422	NA	NA	NA	1	30	Catypicum_R2070,"Caurimucosum_ATCC700975","Cbelfantii_FRC0043","Ccallunae_DSM20147","Ccamporealensis_DSM44610","Cdeserti_GIMN1010","Cdiphtheriae_NCTC11397","Cdoosanense_DSM45436","Cefficiens_YS314","Cglutamicum_ATCC13032","Chalotolerans_YIM70093","Chumireducens_DSM45392","Ckroppenstedtii_DSM44385","Ckutscheri_DSM20755","Clactis_RW25","Cmarinum_DSM44953","Cmaris_DSM45190","Cmustelae_DSM45274","Cps…	0.164278	0.119483	1.6548	0.164278	0.119483	1.6548	2	2	1. 0.74798;2. 91;3. 271;4. 133;5. 98;6. 292;7. 108;8. 322;9. 268;10. V;11. GTT	1. 0.70599;2. 166;3. 496;4. 232;5. 181;6. 541;7. 195;8. 583;9. 412;10. T;11. ACG
ERS451417_00915	1717.62.peg.922	NA	NA	NA	1	19	Catypicum_R2070,"Cbelfantii_FRC0043","Ccamporealensis_DSM44610","Cdiphtheriae_NCTC11397","Cepidermidicanis_DSM45586","Cfalsenii_DSM44353","Cglycinophilum_AJ3170","Cjeikeium_K41","Ckroppenstedtii_DSM44385","Clactis_RW25","Cpseudotuberculosis_31","Cpseudotuberculosis_ATCC19410","Crouxii_FRC0190","Csilvaticum_KL0182","Csimulans_PES1","Culcerans_NCTC12077","Culcerans_NCTC7910","Cuterequi_DSM45634","C…	0.161301	0.161301	1.77438	0.161301	0.161301	1.77439	2306	0
ERS451417_00064	1717.62.peg.60	NA	NA	NA	1	10	Cbelfantii_FRC0043,"Cdiphtheriae_NCTC11397","Cimitans_DSM44264","Crouxii_FRC0190","Csilvaticum_KL0182","Csimulans_PES1","Csingulare_IBSB52218","Culcerans_NCTC12077","Culcerans_NCTC7910","Cureicelerivorans_IMMIBRIV2301"	0.267943	0.267943	1.78608	0.268029	0.267943	1.78608	258	0
ERS451417_01284	1717.62.peg.1292	NA	NA	NA	1	34	Cargentoratense_DSM44202,"Catypicum_R2070","Caurimucosum_ATCC700975","Cbelfantii_FRC0043","Ccallunae_DSM20147","Ccamporealensis_DSM44610","Cdeserti_GIMN1010","Cdiphtheriae_NCTC11397","Cdoosanense_DSM45436","Cefficiens_YS314","Cepidermidicanis_DSM45586","Cglutamicum_ATCC13032","Chalotolerans_YIM70093","Chumireducens_DSM45392","Cjeikeium_K41","Ckroppenstedtii_DSM44385","Ckutscheri_DSM20755","Clacti…	0.12052	0.12052	1.97401	0.12052	0.12052	1.97401	258	0
ERS451417_01650	1717.62.peg.1657	NA	NA	NA	1	37	Cargentoratense_DSM44202,"Catypicum_R2070","Caurimucosum_ATCC700975","Cbelfantii_FRC0043","Ccallunae_DSM20147","Ccamporealensis_DSM44610","Cdeserti_GIMN1010","Cdiphtheriae_NCTC11397","Cdoosanense_DSM45436","Cefficiens_YS314","Cepidermidicanis_DSM45586","Cfalsenii_DSM44353","Cglutamicum_ATCC13032","Cglycinophilum_AJ3170","Chalotolerans_YIM70093","Chumireducens_DSM45392","Cimitans_DSM44264","Cjeike…	0.230333	0.230333	1.67998	0.230333	0.230333	1.67999	3330	0
ERS451417_01883	1717.62.peg.1884	NA	NA	NA	1	35	Cargentoratense_DSM44202,"Catypicum_R2070","Caurimucosum_ATCC700975","Cbelfantii_FRC0043","Ccallunae_DSM20147","Ccamporealensis_DSM44610","Cdeserti_GIMN1010","Cdiphtheriae_NCTC11397","Cdoosanense_DSM45436","Cefficiens_YS314","Cepidermidicanis_DSM45586","Cfalsenii_DSM44353","Cglutamicum_ATCC13032","Chalotolerans_YIM70093","Chumireducens_DSM45392","Cimitans_DSM44264","Cjeikeium_K41","Ckroppenstedti…	0.151218	0.151218	1.87756	0.151218	0.151218	1.87756	258	0
ERS451417_02017	1717.62.peg.2022	NA	NA	NA	1	38	Cargentoratense_DSM44202,"Catypicum_R2070","Caurimucosum_ATCC700975","Cbelfantii_FRC0043","Ccallunae_DSM20147","Ccamporealensis_DSM44610","Cdeserti_GIMN1010","Cdiphtheriae_NCTC11397","Cdoosanense_DSM45436","Cefficiens_YS314","Cepidermidicanis_DSM45586","Cfalsenii_DSM44353","Cglutamicum_ATCC13032","Cglycinophilum_AJ3170","Chalotolerans_YIM70093","Chumireducens_DSM45392","Cimitans_DSM44264","Cjeike…	0.115966	0.115966	2.02032	0.115966	0.115966	2.02032	258	0
ERS451417_00487	1717.62.peg.490	NA	NA	NA	1	17	Cbelfantii_FRC0043,"Ccallunae_DSM20147","Cdeserti_GIMN1010","Cdiphtheriae_NCTC11397","Cglutamicum_ATCC13032","Chalotolerans_YIM70093","Chumireducens_DSM45392","Cmarinum_DSM44953","Cmaris_DSM45190","Cpseudotuberculosis_31","Cpseudotuberculosis_ATCC19410","Crouxii_FRC0190","Csilvaticum_KL0182","Ctestudinoris_DSM44614","Culcerans_NCTC12077","Culcerans_NCTC7910","Cvitaeruminis_DSM20294"	0.312686	0.312686	2.44785	0.312686	0.312686	2.44785	2	1	1. 0.60846;2. 108;3. 322;4. 130;5. 109;6. 325;7. 109;8. 325;9. 301;10. I;11. ATT
ERS451417_00449	1717.62.peg.452	NA	NA	NA	1	17	Cbelfantii_FRC0043,"Ccallunae_DSM20147","Ccamporealensis_DSM44610","Cdeserti_GIMN1010","Cdiphtheriae_NCTC11397","Cepidermidicanis_DSM45586","Cglutamicum_ATCC13032","Ckutscheri_DSM20755","Cmustelae_DSM45274","Cpseudotuberculosis_31","Cpseudotuberculosis_ATCC19410","Crouxii_FRC0190","Csilvaticum_KL0182","Ctestudinoris_DSM44614","Culcerans_NCTC12077","Culcerans_NCTC7910","Cuterequi_DSM45634"	0.0780021	0.0758883	2.07398	0.0780021	0.0758883	2.07398	258	0
ERS451417_00393	1717.62.peg.393	NA	NA	NA	1	39	Cargentoratense_DSM44202,"Catypicum_R2070","Caurimucosum_ATCC700975","Cbelfantii_FRC0043","Ccallunae_DSM20147","Ccamporealensis_DSM44610","Cdeserti_GIMN1010","Cdiphtheriae_NCTC11397","Cdoosanense_DSM45436","Cefficiens_YS314","Cepidermidicanis_DSM45586","Cfalsenii_DSM44353","Cglutamicum_ATCC13032","Cglycinophilum_AJ3170","Chalotolerans_YIM70093","Chumireducens_DSM45392","Cimitans_DSM44264","Cjeike…	0.145821	0.145821	1.81736	0.145821	0.145821	1.81738	258	0
ERS451417_00576	1717.62.peg.579	NA	NA	NA	1	8	Cbelfantii_FRC0043,"Cdiphtheriae_NCTC11397","Cpseudotuberculosis_31","Cpseudotuberculosis_ATCC19410","Crouxii_FRC0190","Csilvaticum_KL0182","Culcerans_NCTC12077","Culcerans_NCTC7910"	0.0597445	0.0597445	2.95762	0.0597445	0.0597445	2.9576	2050	1	1. 0.84356;2. 105;3. 313;4. 116;5. 112;6. 334;7. 118;8. 352;9. 295;10. P;11. CCC
ERS451417_00826	1717.62.peg.830	NA	NA	NA	1	14	Cbelfantii_FRC0043,"Ccallunae_DSM20147","Cdeserti_GIMN1010","Cdiphtheriae_NCTC11397","Cefficiens_YS314","Cglutamicum_ATCC13032","Ckutscheri_DSM20755","Cmustelae_DSM45274","Cpseudotuberculosis_31","Cpseudotuberculosis_ATCC19410","Crouxii_FRC0190","Csilvaticum_KL0182","Culcerans_NCTC12077","Culcerans_NCTC7910"	0.160245	0.160245	2.14047	0.160245	0.160245	2.14047	3330	0
ERS451417_01659	1717.62.peg.1666	NA	NA	NA	1	10	Cbelfantii_FRC0043,"Cdiphtheriae_NCTC11397","Cefficiens_YS314","Ckutscheri_DSM20755","Cmustelae_DSM45274","Cpseudotuberculosis_31","Cpseudotuberculosis_ATCC19410","Csilvaticum_KL0182","Culcerans_NCTC12077","Culcerans_NCTC7910"	0.158385	0.158385	2.47034	0.158385	0.158385	2.47034	2	2	1. 0.69816;2. 41;3. 121;4. 56;5. 41;6. 121;7. 41;8. 121;9. 118;10. V;11. GTC	1. 0.52679;2. 270;3. 808;4. 335;5. 278;6. 832;7. 324;8. 970;9. 679;10. V;11. GTG
ERS451417_01927	1717.62.peg.1924	NA	NA	NA	1	38	Cargentoratense_DSM44202,"Catypicum_R2070","Caurimucosum_ATCC700975","Cbelfantii_FRC0043","Ccallunae_DSM20147","Ccamporealensis_DSM44610","Cdeserti_GIMN1010","Cdiphtheriae_NCTC11397","Cdoosanense_DSM45436","Cefficiens_YS314","Cepidermidicanis_DSM45586","Cfalsenii_DSM44353","Cglutamicum_ATCC13032","Cglycinophilum_AJ3170","Chalotolerans_YIM70093","Chumireducens_DSM45392","Cimitans_DSM44264","Cjeike…	0.167014	0.167014	1.80007	0.167014	0.167014	1.80007	2	3	1. 0.64483;2. 56;3. 166;4. 73;5. 73;6. 217;7. 73;8. 217;9. 142;10. H;11. CAC	1. 0.52722;2. 193;3. 577;4. 210;5. 210;6. 628;7. 210;8. 628;9. 547;10. P;11. CCA	1. 0.41407;2. 451;3. 1351;4. 468;5. 468;6. 1402;7. 468;8. 1402;9. 1321;10. I;11. ATC
ERS451417_02002	1717.62.peg.2006	NA	NA	NA	1	6	Cbelfantii_FRC0043,"Cdiphtheriae_NCTC11397","Cpseudotuberculosis_ATCC19410","Csilvaticum_KL0182","Culcerans_NCTC12077","Culcerans_NCTC7910"	0.359583	0.113031	4.7059	0.279616	0.113031	4.7059	258	0
ERS451417_01286	1717.62.peg.1294	NA	NA	NA	1	33	Catypicum_R2070,"Caurimucosum_ATCC700975","Cbelfantii_FRC0043","Ccallunae_DSM20147","Ccamporealensis_DSM44610","Cdiphtheriae_NCTC11397","Cdoosanense_DSM45436","Cefficiens_YS314","Cepidermidicanis_DSM45586","Cfalsenii_DSM44353","Cglutamicum_ATCC13032","Cglycinophilum_AJ3170","Chalotolerans_YIM70093","Cimitans_DSM44264","Cjeikeium_K41","Ckutscheri_DSM20755","Clactis_RW25","Cmarinum_DSM44953","Cmari…	0.250609	0.250609	1.8486	0.250609	0.250609	1.8486	258	0
ERS451417_01623	1717.62.peg.1631	NA	NA	NA	1	38	Cargentoratense_DSM44202,"Catypicum_R2070","Caurimucosum_ATCC700975","Cbelfantii_FRC0043","Ccallunae_DSM20147","Ccamporealensis_DSM44610","Cdeserti_GIMN1010","Cdiphtheriae_NCTC11397","Cdoosanense_DSM45436","Cefficiens_YS314","Cepidermidicanis_DSM45586","Cfalsenii_DSM44353","Cglutamicum_ATCC13032","Cglycinophilum_AJ3170","Chalotolerans_YIM70093","Chumireducens_DSM45392","Cimitans_DSM44264","Cjeike…	0.114367	0.114367	1.63105	0.114367	0.114367	1.63105	2	1	1. 0.52806;2. 85;3. 253;4. 95;5. 95;6. 283;7. 96;8. 286;9. 232;10. L;11. TTG
ERS451417_02054	1717.62.peg.2066	NA	NA	NA	1	10	Cbelfantii_FRC0043,"Cdiphtheriae_NCTC11397","Cepidermidicanis_DSM45586","Cmustelae_DSM45274","Cpseudotuberculosis_31","Cpseudotuberculosis_ATCC19410","Csilvaticum_KL0182","Culcerans_NCTC12077","Culcerans_NCTC7910","Cvitaeruminis_DSM20294"	0.0654106	0.0654106	2.26801	0.0654106	0.0654106	2.26801	2	2	1. 0.40663;2. 118;3. 352;4. 226;5. 156;6. 466;7. 162;8. 484;9. 208;10. K;11. AAA	1. 0.43161;2. 395;3. 1183;4. 586;5. 493;6. 1477;7. 514;8. 1540;9. 937;10. V;11. GTC
ERS451417_01287	1717.62.peg.1295	NA	NA	NA	1	34	Catypicum_R2070,"Caurimucosum_ATCC700975","Cbelfantii_FRC0043","Ccallunae_DSM20147","Ccamporealensis_DSM44610","Cdiphtheriae_NCTC11397","Cdoosanense_DSM45436","Cefficiens_YS314","Cepidermidicanis_DSM45586","Cfalsenii_DSM44353","Cglutamicum_ATCC13032","Cglycinophilum_AJ3170","Chalotolerans_YIM70093","Cimitans_DSM44264","Cjeikeium_K41","Ckroppenstedtii_DSM44385","Ckutscheri_DSM20755","Clactis_RW25"…	0.154748	0.154748	1.92336	0.154748	0.154748	1.92339	258	0
ERS451417_00977	1717.62.peg.987	NA	NA	NA	1	28	Catypicum_R2070,"Caurimucosum_ATCC700975","Cbelfantii_FRC0043","Ccallunae_DSM20147","Ccamporealensis_DSM44610","Cdeserti_GIMN1010","Cdiphtheriae_NCTC11397","Cdoosanense_DSM45436","Cefficiens_YS314","Cglutamicum_ATCC13032","Chumireducens_DSM45392","Cimitans_DSM44264","Ckutscheri_DSM20755","Cmarinum_DSM44953","Cmaris_DSM45190","Cmustelae_DSM45274","Cpseudotuberculosis_31","Cpseudotuberculosis_ATCC1…	0.212863	0.212826	1.79348	0.212853	0.212826	1.79343	3330	0
ERS451417_02148	1717.62.peg.2170	NA	NA	NA	1	8	Cbelfantii_FRC0043,"Cdiphtheriae_NCTC11397","Clactis_RW25","Cpseudotuberculosis_31","Cpseudotuberculosis_ATCC19410","Csilvaticum_KL0182","Culcerans_NCTC12077","Culcerans_NCTC7910"	0.10901	0.10901	2.4176	0.10901	0.10901	2.4176	3074	2	1. 0.65835;2. 93;3. 277;4. 188;5. 106;6. 316;7. 109;8. 325;9. 187;10. L;11. CTA	1. 0.41661;2. 94;3. 280;4. 189;5. 107;6. 319;7. 110;8. 328;9. 190;10. R;11. CGC
ERS451417_00961	1717.62.peg.968	NA	NA	NA	1	39	Cargentoratense_DSM44202,"Catypicum_R2070","Caurimucosum_ATCC700975","Cbelfantii_FRC0043","Ccallunae_DSM20147","Ccamporealensis_DSM44610","Cdeserti_GIMN1010","Cdiphtheriae_NCTC11397","Cdoosanense_DSM45436","Cefficiens_YS314","Cepidermidicanis_DSM45586","Cfalsenii_DSM44353","Cglutamicum_ATCC13032","Cglycinophilum_AJ3170","Chalotolerans_YIM70093","Chumireducens_DSM45392","Cimitans_DSM44264","Cjeike…	0.153876	0.153876	1.47423	0.153876	0.153876	1.47423	258	0
ERS451417_00541	1717.62.peg.545	NA	NA	NA	1	9	Cbelfantii_FRC0043,"Cdiphtheriae_NCTC11397","Cglycinophilum_AJ3170","Cpseudotuberculosis_31","Cpseudotuberculosis_ATCC19410","Crouxii_FRC0190","Csilvaticum_KL0182","Culcerans_NCTC12077","Culcerans_NCTC7910"	0.0742911	0.0742911	2.51627	0.0742911	0.0742911	2.51627	2	1	1. 0.53875;2. 126;3. 376;4. 129;5. 129;6. 385;7. 139;8. 415;9. 271;10. D;11. GAC
ERS451417_00310	1717.62.peg.311	NA	NA	NA	1	39	Cargentoratense_DSM44202,"Catypicum_R2070","Caurimucosum_ATCC700975","Cbelfantii_FRC0043","Ccallunae_DSM20147","Ccamporealensis_DSM44610","Cdeserti_GIMN1010","Cdiphtheriae_NCTC11397","Cdoosanense_DSM45436","Cefficiens_YS314","Cepidermidicanis_DSM45586","Cfalsenii_DSM44353","Cglutamicum_ATCC13032","Cglycinophilum_AJ3170","Chalotolerans_YIM70093","Chumireducens_DSM45392","Cimitans_DSM44264","Cjeike…	0.167804	0.167804	1.95441	0.167804	0.167804	1.95441	1282	0
ERS451417_01722	1717.62.peg.1725	NA	NA	NA	1	10	Cbelfantii_FRC0043,"Cdiphtheriae_NCTC11397","Ckutscheri_DSM20755","Cmustelae_DSM45274","Cpseudotuberculosis_31","Cpseudotuberculosis_ATCC19410","Csilvaticum_KL0182","Culcerans_NCTC12077","Culcerans_NCTC7910","Cvitaeruminis_DSM20294"	0.201452	0.185898	2.44881	0.201452	0.185898	2.4488	2050	3	1. 0.44009;2. 129;3. 385;4. 230;5. 137;6. 409;7. 141;8. 421;9. 280;10. D;11. GAT	1. 0.41688;2. 133;3. 397;4. 245;5. 141;6. 421;7. 145;8. 433;9. 292;10. N;11. AAC	1. 0.60396;2. 150;3. 448;4. 262;5. 158;6. 472;7. 162;8. 484;9. 343;10. A;11. GCT
ERS451417_01618	1717.62.peg.1626	NA	NA	NA	1	9	Cbelfantii_FRC0043,"Cdiphtheriae_NCTC11397","Chalotolerans_YIM70093","Cmarinum_DSM44953","Cpseudotuberculosis_31","Cpseudotuberculosis_ATCC19410","Csilvaticum_KL0182","Culcerans_NCTC12077","Culcerans_NCTC7910"	0.174308	0.174308	2.23857	0.174308	0.174308	2.23857	2	2	1. 0.45609;2. 126;3. 376;4. 211;5. 129;6. 385;7. 129;8. 385;9. 316;10. E;11. GAA	1. 0.46402;2. 186;3. 556;4. 293;5. 190;6. 568;7. 189;8. 565;9. 460;10. S;11. TCG
ERS451417_01178	1717.62.peg.1187	NA	NA	NA	1	39	Cargentoratense_DSM44202,"Catypicum_R2070","Caurimucosum_ATCC700975","Cbelfantii_FRC0043","Ccallunae_DSM20147","Ccamporealensis_DSM44610","Cdeserti_GIMN1010","Cdiphtheriae_NCTC11397","Cdoosanense_DSM45436","Cefficiens_YS314","Cepidermidicanis_DSM45586","Cfalsenii_DSM44353","Cglutamicum_ATCC13032","Cglycinophilum_AJ3170","Chalotolerans_YIM70093","Chumireducens_DSM45392","Cimitans_DSM44264","Cjeike…	0.172291	0.172291	1.65519	0.172291	0.172291	1.65519	1282	0
ERS451417_02004	1717.62.peg.2008	NA	NA	NA	1	7	Cbelfantii_FRC0043,"Cdiphtheriae_NCTC11397","Cpseudotuberculosis_31","Cpseudotuberculosis_ATCC19410","Csilvaticum_KL0182","Culcerans_NCTC12077","Culcerans_NCTC7910"	0.10636	0.0979427	6.02735	0.10636	0.0979427	6.02734	2	1	1. 0.69114;2. 219;3. 655;4. 257;5. 219;6. 655;7. 219;8. 655;9. 655;10. L;11. TTA
ERS451417_01569	1717.62.peg.1578	NA	NA	NA	1	38	Cargentoratense_DSM44202,"Catypicum_R2070","Caurimucosum_ATCC700975","Cbelfantii_FRC0043","Ccallunae_DSM20147","Ccamporealensis_DSM44610","Cdeserti_GIMN1010","Cdiphtheriae_NCTC11397","Cdoosanense_DSM45436","Cefficiens_YS314","Cepidermidicanis_DSM45586","Cfalsenii_DSM44353","Cglutamicum_ATCC13032","Cglycinophilum_AJ3170","Chalotolerans_YIM70093","Chumireducens_DSM45392","Cimitans_DSM44264","Cjeike…	0.125786	0.125786	1.9294	0.125786	0.125786	1.92941	258	0
ERS451417_01476	1717.62.peg.1486	NA	NA	NA	1	37	Cargentoratense_DSM44202,"Catypicum_R2070","Caurimucosum_ATCC700975","Cbelfantii_FRC0043","Ccallunae_DSM20147","Ccamporealensis_DSM44610","Cdeserti_GIMN1010","Cdiphtheriae_NCTC11397","Cdoosanense_DSM45436","Cefficiens_YS314","Cepidermidicanis_DSM45586","Cglutamicum_ATCC13032","Cglycinophilum_AJ3170","Chalotolerans_YIM70093","Chumireducens_DSM45392","Cimitans_DSM44264","Cjeikeium_K41","Ckroppenste…	0.288497	0.26405	1.69734	0.288497	0.26405	1.69734	3074	1	1. 0.69379;2. 206;3. 616;4. 234;5. 234;6. 700;7. 272;8. 814;9. 502;10. G;11. GGT
ERS451417_01925	1717.62.peg.1922	NA	NA	NA	1	11	Cbelfantii_FRC0043,"Cdiphtheriae_NCTC11397","Chalotolerans_YIM70093","Chumireducens_DSM45392","Cmaris_DSM45190","Cpseudotuberculosis_31","Cpseudotuberculosis_ATCC19410","Csilvaticum_KL0182","Culcerans_NCTC12077","Culcerans_NCTC7910","Cvitaeruminis_DSM20294"	0.238795	0.238795	2.08636	0.238795	0.238795	2.08637	2050	1	1. 0.56231;2. 113;3. 337;4. 147;5. 127;6. 379;7. 140;8. 418;9. 130;10. R;11. CGA
ERS451417_00285	1717.62.peg.286	NA	NA	NA	1	29	Cargentoratense_DSM44202,"Caurimucosum_ATCC700975","Cbelfantii_FRC0043","Ccallunae_DSM20147","Ccamporealensis_DSM44610","Cdeserti_GIMN1010","Cdiphtheriae_NCTC11397","Cdoosanense_DSM45436","Cefficiens_YS314","Cglutamicum_ATCC13032","Chumireducens_DSM45392","Cimitans_DSM44264","Ckutscheri_DSM20755","Cmarinum_DSM44953","Cmaris_DSM45190","Cmustelae_DSM45274","Cpseudotuberculosis_31","Cpseudotuberculo…	0.246034	0.246034	1.78089	0.246034	0.246034	1.78089	3074	1	1. 0.44764;2. 174;3. 520;4. 204;5. 192;6. 574;7. 215;8. 643;9. 337;10. P;11. CCG
ERS451417_00467	1717.62.peg.471	NA	NA	NA	1	10	Cbelfantii_FRC0043,"Cdiphtheriae_NCTC11397","Ckutscheri_DSM20755","Cpseudotuberculosis_31","Cpseudotuberculosis_ATCC19410","Crouxii_FRC0190","Csilvaticum_KL0182","Culcerans_NCTC12077","Culcerans_NCTC7910","Cvitaeruminis_DSM20294"	0.0987386	0.0987386	1.81921	0.0987386	0.0987386	1.81922	2	1	1. 0.43646;2. 129;3. 385;4. 140;5. 139;6. 415;7. 156;8. 466;9. 295;10. K;11. AAG
ERS451417_02023	1717.62.peg.2028	NA	NA	NA	1	33	Caurimucosum_ATCC700975,"Cbelfantii_FRC0043","Ccallunae_DSM20147","Ccamporealensis_DSM44610","Cdeserti_GIMN1010","Cdiphtheriae_NCTC11397","Cdoosanense_DSM45436","Cefficiens_YS314","Cepidermidicanis_DSM45586","Cglutamicum_ATCC13032","Cglycinophilum_AJ3170","Chalotolerans_YIM70093","Chumireducens_DSM45392","Cimitans_DSM44264","Cjeikeium_K41","Ckroppenstedtii_DSM44385","Ckutscheri_DSM20755","Clactis…	0.328937	0.328937	1.75808	0.328937	0.328937	1.75808	3330	0
ERS451417_00394	1717.62.peg.394	NA	NA	NA	1	19	Cbelfantii_FRC0043,"Ccamporealensis_DSM44610","Cdiphtheriae_NCTC11397","Chalotolerans_YIM70093","Chumireducens_DSM45392","Cjeikeium_K41","Ckutscheri_DSM20755","Cmarinum_DSM44953","Cmaris_DSM45190","Cmustelae_DSM45274","Crouxii_FRC0190","Csilvaticum_KL0182","Csimulans_PES1","Csingulare_IBSB52218","Ctestudinoris_DSM44614","Culcerans_NCTC12077","Culcerans_NCTC7910","Curealyticum_DSM7109","Cvitaerumi…	0.0739349	0.0739349	1.90295	0.0739349	0.0739349	1.90294	258	0
ERS451417_00094	1717.62.peg.92	NA	NA	NA	1	11	Cbelfantii_FRC0043,"Cdiphtheriae_NCTC11397","Ckutscheri_DSM20755","Cmustelae_DSM45274","Cpseudotuberculosis_31","Cpseudotuberculosis_ATCC19410","Crouxii_FRC0190","Csilvaticum_KL0182","Culcerans_NCTC12077","Culcerans_NCTC7910","Cvitaeruminis_DSM20294"	0.135887	0.135887	2.86227	0.153495	0.131393	2.84356	2050	5	1. 0.95482;2. 40;3. 118;4. 55;5. 55;6. 163;7. 55;8. 163;9. 22;10. N;11. AAC	1. 0.47847;2. 89;3. 265;4. 105;5. 104;6. 310;7. 104;8. 310;9. 169;10. V;11. GTT	1. 0.41969;2. 135;3. 403;4. 151;5. 150;6. 448;7. 150;8. 448;9. 307;10. T;11. ACC	1. 0.53183;2. 187;3. 559;4. 204;5. 202;6. 604;7. 202;8. 604;9. 463;10. V;11. GTC	1. 0.53324;2. 283;3. 847;4. 418;5. 317;6. 949;7. 321;8. 961;9. 661;10. A;11. GCA
ERS451417_01671	1717.62.peg.1678	NA	NA	NA	1	16	Cbelfantii_FRC0043,"Ccamporealensis_DSM44610","Cdiphtheriae_NCTC11397","Cfalsenii_DSM44353","Chumireducens_DSM45392","Cjeikeium_K41","Ckutscheri_DSM20755","Clactis_RW25","Cpseudotuberculosis_31","Cpseudotuberculosis_ATCC19410","Csilvaticum_KL0182","Csimulans_PES1","Ctestudinoris_DSM44614","Culcerans_NCTC12077","Culcerans_NCTC7910","Cvitaeruminis_DSM20294"	0.152951	0.152951	2.36112	0.152951	0.152951	2.36112	258	0
ERS451417_00868	1717.62.peg.873	NA	NA	NA	1	8	Cbelfantii_FRC0043,"Cdiphtheriae_NCTC11397","Cpseudotuberculosis_31","Cpseudotuberculosis_ATCC19410","Crouxii_FRC0190","Csilvaticum_KL0182","Culcerans_NCTC12077","Culcerans_NCTC7910"	0.160774	0.118391	3.00013	0.160774	0.118391	3.00013	2	3	1. 0.58809;2. 54;3. 160;4. 79;5. 54;6. 160;7. 54;8. 160;9. 40;10. S;11. AGC	1. 0.60233;2. 209;3. 625;4. 266;5. 209;6. 625;7. 209;8. 625;9. 505;10. A;11. GCA	1. 0.58015;2. 213;3. 637;4. 273;5. 213;6. 637;7. 213;8. 637;9. 517;10. P;11. CCC
ERS451417_01755	1717.62.peg.1758	NA	NA	NA	1	35	Caurimucosum_ATCC700975,"Cbelfantii_FRC0043","Ccallunae_DSM20147","Ccamporealensis_DSM44610","Cdeserti_GIMN1010","Cdiphtheriae_NCTC11397","Cdoosanense_DSM45436","Cefficiens_YS314","Cepidermidicanis_DSM45586","Cfalsenii_DSM44353","Cglutamicum_ATCC13032","Cglycinophilum_AJ3170","Chalotolerans_YIM70093","Chumireducens_DSM45392","Cimitans_DSM44264","Cjeikeium_K41","Ckutscheri_DSM20755","Clactis_RW25"…	0.308025	0.217459	1.70255	0.308025	0.217459	1.70255	3074	6	1. 0.55293;2. 9;3. 25;4. 41;5. 38;6. 112;7. 72;8. 214;9. 10;10. A;11. GCC	1. 0.73173;2. 54;3. 160;4. 86;5. 83;6. 247;7. 117;8. 349;9. 145;10. A;11. GCC	1. 0.7425;2. 85;3. 253;4. 117;5. 114;6. 340;7. 148;8. 442;9. 238;10. T;11. ACC	1. 0.64655;2. 128;3. 382;4. 160;5. 157;6. 469;7. 191;8. 571;9. 361;10. Q;11. CAA	1. 0.81564;2. 175;3. 523;4. 210;5. 207;6. 619;7. 241;8. 721;9. 478;10. L;11. CTT	1. 0.75481;2. 288;3. 862;4. 365;5. 330;6. 988;7. 377;8. 1129;9. 730;10. C;11. TGT
ERS451417_01494	1717.62.peg.1502	NA	NA	NA	1	30	Catypicum_R2070,"Caurimucosum_ATCC700975","Cbelfantii_FRC0043","Ccallunae_DSM20147","Ccamporealensis_DSM44610","Cdeserti_GIMN1010","Cdiphtheriae_NCTC11397","Cdoosanense_DSM45436","Cefficiens_YS314","Cglutamicum_ATCC13032","Chalotolerans_YIM70093","Chumireducens_DSM45392","Cimitans_DSM44264","Ckutscheri_DSM20755","Clactis_RW25","Cmarinum_DSM44953","Cmaris_DSM45190","Cmustelae_DSM45274","Cpseudotub…	0.14467	0.14467	1.73425	0.14467	0.14467	1.73425	2050	2	1. 0.56523;2. 28;3. 82;4. 40;5. 32;6. 94;7. 33;8. 97;9. 67;10. D;11. GAT	1. 0.42246;2. 163;3. 487;4. 176;5. 167;6. 499;7. 172;8. 514;9. 328;10. S;11. AGT
ERS451417_00887	1717.62.peg.893	NA	NA	NA	1	30	Catypicum_R2070,"Caurimucosum_ATCC700975","Cbelfantii_FRC0043","Ccallunae_DSM20147","Ccamporealensis_DSM44610","Cdeserti_GIMN1010","Cdiphtheriae_NCTC11397","Cdoosanense_DSM45436","Cefficiens_YS314","Cglutamicum_ATCC13032","Chalotolerans_YIM70093","Chumireducens_DSM45392","Cimitans_DSM44264","Ckroppenstedtii_DSM44385","Ckutscheri_DSM20755","Clactis_RW25","Cmarinum_DSM44953","Cmaris_DSM45190","Cmus…	0.206683	0.188593	1.99432	0.206683	0.188593	1.99432	2	2	1. 0.62308;2. 236;3. 706;4. 271;5. 271;6. 811;7. 343;8. 1027;9. 637;10. A;11. GCC	1. 0.61787;2. 258;3. 772;4. 293;5. 293;6. 877;7. 365;8. 1093;9. 703;10. V;11. GTC
ERS451417_01997	1717.62.peg.2001	NA	NA	NA	1	7	Cbelfantii_FRC0043,"Cdiphtheriae_NCTC11397","Cpseudotuberculosis_31","Cpseudotuberculosis_ATCC19410","Csilvaticum_KL0182","Culcerans_NCTC12077","Culcerans_NCTC7910"	0.268801	0.268801	5.85053	0.268801	0.268801	5.85055	258	0
ERS451417_01379	1717.62.peg.1388	NA	NA	NA	1	7	Cbelfantii_FRC0043,"Cdiphtheriae_NCTC11397","Cpseudotuberculosis_31","Cpseudotuberculosis_ATCC19410","Csilvaticum_KL0182","Culcerans_NCTC12077","Culcerans_NCTC7910"	0.171713	0.171713	3.17177	0.171713	0.171713	3.17177	2	1	1. 0.40986;2. 234;3. 700;4. 367;5. 251;6. 751;7. 257;8. 769;9. 619;10. G;11. GGT
ERS451417_01334	1717.62.peg.1342	NA	NA	NA	1	38	Cargentoratense_DSM44202,"Catypicum_R2070","Caurimucosum_ATCC700975","Cbelfantii_FRC0043","Ccallunae_DSM20147","Ccamporealensis_DSM44610","Cdeserti_GIMN1010","Cdiphtheriae_NCTC11397","Cdoosanense_DSM45436","Cefficiens_YS314","Cepidermidicanis_DSM45586","Cfalsenii_DSM44353","Cglutamicum_ATCC13032","Cglycinophilum_AJ3170","Chalotolerans_YIM70093","Chumireducens_DSM45392","Cimitans_DSM44264","Cjeike…	0.149529	0.149509	1.5765	0.149509	0.149509	1.5765	2	1	1. 0.49157;2. 147;3. 439;4. 149;5. 149;6. 445;7. 166;8. 496;9. 394;10. V;11. GTC
ERS451417_01825	1717.62.peg.1830	NA	NA	NA	1	17	Cbelfantii_FRC0043,"Ccallunae_DSM20147","Cdeserti_GIMN1010","Cdiphtheriae_NCTC11397","Cdoosanense_DSM45436","Cepidermidicanis_DSM45586","Cglutamicum_ATCC13032","Ckutscheri_DSM20755","Clactis_RW25","Cpseudotuberculosis_31","Cpseudotuberculosis_ATCC19410","Csilvaticum_KL0182","Csimulans_PES1","Culcerans_NCTC12077","Culcerans_NCTC7910","Cuterequi_DSM45634","Cvitaeruminis_DSM20294"	0.155859	0.155859	1.96353	0.155859	0.155859	1.96353	258	0
ERS451417_00895	1717.62.peg.901	NA	NA	NA	1	36	Cargentoratense_DSM44202,"Catypicum_R2070","Caurimucosum_ATCC700975","Cbelfantii_FRC0043","Ccallunae_DSM20147","Ccamporealensis_DSM44610","Cdeserti_GIMN1010","Cdiphtheriae_NCTC11397","Cdoosanense_DSM45436","Cefficiens_YS314","Cepidermidicanis_DSM45586","Cfalsenii_DSM44353","Cglutamicum_ATCC13032","Chalotolerans_YIM70093","Chumireducens_DSM45392","Cimitans_DSM44264","Cjeikeium_K41","Ckroppenstedti…	0.102883	0.102883	1.67151	0.102883	0.102883	1.67151	258	0
ERS451417_00411	1717.62.peg.411	NA	NA	NA	1	36	Cargentoratense_DSM44202,"Catypicum_R2070","Cbelfantii_FRC0043","Ccallunae_DSM20147","Cdeserti_GIMN1010","Cdiphtheriae_NCTC11397","Cdoosanense_DSM45436","Cefficiens_YS314","Cepidermidicanis_DSM45586","Cfalsenii_DSM44353","Cglutamicum_ATCC13032","Cglycinophilum_AJ3170","Chalotolerans_YIM70093","Chumireducens_DSM45392","Cimitans_DSM44264","Cjeikeium_K41","Ckroppenstedtii_DSM44385","Ckutscheri_DSM20…	0.0853027	0.0853027	1.72805	0.0853027	0.0853027	1.72803	258	0
ERS451417_01154	1717.62.peg.1165	NA	NA	NA	1	39	Cargentoratense_DSM44202,"Catypicum_R2070","Caurimucosum_ATCC700975","Cbelfantii_FRC0043","Ccallunae_DSM20147","Ccamporealensis_DSM44610","Cdeserti_GIMN1010","Cdiphtheriae_NCTC11397","Cdoosanense_DSM45436","Cefficiens_YS314","Cepidermidicanis_DSM45586","Cfalsenii_DSM44353","Cglutamicum_ATCC13032","Cglycinophilum_AJ3170","Chalotolerans_YIM70093","Chumireducens_DSM45392","Cimitans_DSM44264","Cjeike…	0.438116	0.13304	2.19008	0.245937	0.13304	2.19008	258	0
ERS451417_01337	1717.62.peg.1345	NA	NA	NA	1	6	Cdiphtheriae_NCTC11397,"Cpseudotuberculosis_31","Cpseudotuberculosis_ATCC19410","Csilvaticum_KL0182","Culcerans_NCTC12077","Culcerans_NCTC7910"	0.443569	0.443569	4.25492	0.443569	0.443569	4.25492	258	0
ERS451417_00518	1717.62.peg.522	NA	NA	NA	1	9	Cbelfantii_FRC0043,"Cdiphtheriae_NCTC11397","Cjeikeium_K41","Clactis_RW25","Cpseudotuberculosis_31","Cpseudotuberculosis_ATCC19410","Csilvaticum_KL0182","Culcerans_NCTC12077","Culcerans_NCTC7910"	0.0857075	0.0857075	3.44598	0.0857068	0.0857068	3.44595	2	3	1. 0.46354;2. 16;3. 46;4. 62;5. 56;6. 166;7. 56;8. 166;9. 1;10. A;11. GCT	1. 0.72708;2. 136;3. 406;4. 186;5. 176;6. 526;7. 176;8. 526;9. 361;10. I;11. ATC	1. 0.50699;2. 208;3. 622;4. 259;5. 248;6. 742;7. 248;8. 742;9. 577;10. F;11. TTT
ERS451417_01230	1717.62.peg.1238	NA	NA	NA	1	15	Cargentoratense_DSM44202,"Cbelfantii_FRC0043","Cdiphtheriae_NCTC11397","Cepidermidicanis_DSM45586","Ckroppenstedtii_DSM44385","Ckutscheri_DSM20755","Clactis_RW25","Cmustelae_DSM45274","Cpseudotuberculosis_31","Cpseudotuberculosis_ATCC19410","Crouxii_FRC0190","Csilvaticum_KL0182","Culcerans_NCTC12077","Culcerans_NCTC7910","Cvitaeruminis_DSM20294"	0.138761	0.138761	2.18536	0.138761	0.138761	2.18536	2	3	1. 0.453;2. 289;3. 865;4. 371;5. 353;6. 1057;7. 374;8. 1120;9. 721;10. L;11. CTA	1. 0.44839;2. 901;3. 2701;4. 1009;5. 979;6. 2935;7. 1045;8. 3133;9. 2404;10. I;11. ATC	1. 0.42914;2. 947;3. 2839;4. 1055;5. 1025;6. 3073;7. 1091;8. 3271;9. 2542;10. E;11. GAA
ERS451417_00739	1717.62.peg.742	NA	NA	NA	1	39	Cargentoratense_DSM44202,"Catypicum_R2070","Caurimucosum_ATCC700975","Cbelfantii_FRC0043","Ccallunae_DSM20147","Ccamporealensis_DSM44610","Cdeserti_GIMN1010","Cdiphtheriae_NCTC11397","Cdoosanense_DSM45436","Cefficiens_YS314","Cepidermidicanis_DSM45586","Cfalsenii_DSM44353","Cglutamicum_ATCC13032","Cglycinophilum_AJ3170","Chalotolerans_YIM70093","Chumireducens_DSM45392","Cimitans_DSM44264","Cjeike…	0.177449	0.177449	1.79294	0.177449	0.177449	1.79294	258	0
ERS451417_00640	1717.62.peg.644	NA	NA	NA	1	39	Cargentoratense_DSM44202,"Catypicum_R2070","Caurimucosum_ATCC700975","Cbelfantii_FRC0043","Ccallunae_DSM20147","Ccamporealensis_DSM44610","Cdeserti_GIMN1010","Cdiphtheriae_NCTC11397","Cdoosanense_DSM45436","Cefficiens_YS314","Cepidermidicanis_DSM45586","Cfalsenii_DSM44353","Cglutamicum_ATCC13032","Cglycinophilum_AJ3170","Chalotolerans_YIM70093","Chumireducens_DSM45392","Cimitans_DSM44264","Cjeike…	0.131749	0.131749	1.74494	0.131749	0.131749	1.74495	3330	0
ERS451417_00712	1717.62.peg.717	NA	NA	NA	1	39	Cargentoratense_DSM44202,"Catypicum_R2070","Caurimucosum_ATCC700975","Cbelfantii_FRC0043","Ccallunae_DSM20147","Ccamporealensis_DSM44610","Cdeserti_GIMN1010","Cdiphtheriae_NCTC11397","Cdoosanense_DSM45436","Cefficiens_YS314","Cepidermidicanis_DSM45586","Cfalsenii_DSM44353","Cglutamicum_ATCC13032","Cglycinophilum_AJ3170","Chalotolerans_YIM70093","Chumireducens_DSM45392","Cimitans_DSM44264","Cjeike…	0.159182	0.159182	1.49291	0.159182	0.159182	1.49291	2	1	1. 0.49225;2. 329;3. 985;4. 372;5. 372;6. 1114;7. 440;8. 1318;9. 841;10. N;11. AAC
ERS451417_01373	1717.62.peg.1382	NA	NA	NA	1	38	Cargentoratense_DSM44202,"Catypicum_R2070","Caurimucosum_ATCC700975","Cbelfantii_FRC0043","Ccallunae_DSM20147","Ccamporealensis_DSM44610","Cdeserti_GIMN1010","Cdiphtheriae_NCTC11397","Cdoosanense_DSM45436","Cefficiens_YS314","Cepidermidicanis_DSM45586","Cfalsenii_DSM44353","Cglutamicum_ATCC13032","Cglycinophilum_AJ3170","Chalotolerans_YIM70093","Chumireducens_DSM45392","Cimitans_DSM44264","Cjeike…	0.116124	0.116124	1.95549	0.116124	0.116124	1.95549	1282	0
ERS451417_01243	1717.62.peg.1251	NA	NA	NA	1	8	Cbelfantii_FRC0043,"Cdiphtheriae_NCTC11397","Cmustelae_DSM45274","Cpseudotuberculosis_ATCC19410","Crouxii_FRC0190","Csilvaticum_KL0182","Culcerans_NCTC12077","Culcerans_NCTC7910"	0.219553	0.219553	2.67854	0.219553	0.219553	2.67855	258	0
ERS451417_00508	1717.62.peg.512	NA	NA	NA	1	34	Cargentoratense_DSM44202,"Catypicum_R2070","Caurimucosum_ATCC700975","Cbelfantii_FRC0043","Ccallunae_DSM20147","Ccamporealensis_DSM44610","Cdeserti_GIMN1010","Cdiphtheriae_NCTC11397","Cdoosanense_DSM45436","Cefficiens_YS314","Cepidermidicanis_DSM45586","Cglutamicum_ATCC13032","Chalotolerans_YIM70093","Chumireducens_DSM45392","Cimitans_DSM44264","Ckroppenstedtii_DSM44385","Ckutscheri_DSM20755","Cl…	0.125721	0.125721	1.97919	0.125721	0.125721	1.97919	2306	0
ERS451417_00318	1717.62.peg.320	NA	NA	NA	1	39	Cargentoratense_DSM44202,"Catypicum_R2070","Caurimucosum_ATCC700975","Cbelfantii_FRC0043","Ccallunae_DSM20147","Ccamporealensis_DSM44610","Cdeserti_GIMN1010","Cdiphtheriae_NCTC11397","Cdoosanense_DSM45436","Cefficiens_YS314","Cepidermidicanis_DSM45586","Cfalsenii_DSM44353","Cglutamicum_ATCC13032","Cglycinophilum_AJ3170","Chalotolerans_YIM70093","Chumireducens_DSM45392","Cimitans_DSM44264","Cjeike…	0.02542	0.02542	1.63754	0.02542	0.02542	1.63754	258	0
ERS451417_02145	1717.62.peg.2167	NA	NA	NA	1	38	Cargentoratense_DSM44202,"Catypicum_R2070","Caurimucosum_ATCC700975","Cbelfantii_FRC0043","Ccallunae_DSM20147","Ccamporealensis_DSM44610","Cdeserti_GIMN1010","Cdiphtheriae_NCTC11397","Cdoosanense_DSM45436","Cefficiens_YS314","Cepidermidicanis_DSM45586","Cfalsenii_DSM44353","Cglutamicum_ATCC13032","Cglycinophilum_AJ3170","Chalotolerans_YIM70093","Chumireducens_DSM45392","Cimitans_DSM44264","Cjeike…	0.114196	0.114196	1.69436	0.114196	0.114196	1.69435	2	1	1. 0.60857;2. 85;3. 253;4. 87;5. 87;6. 259;7. 87;8. 259;9. 217;10. K;11. AAG
ERS451417_00067	1717.62.peg.63	NA	NA	NA	1	15	Cbelfantii_FRC0043,"Cdiphtheriae_NCTC11397","Cdoosanense_DSM45436","Cefficiens_YS314","Chalotolerans_YIM70093","Chumireducens_DSM45392","Cmarinum_DSM44953","Cpseudotuberculosis_31","Cpseudotuberculosis_ATCC19410","Crouxii_FRC0190","Csilvaticum_KL0182","Ctestudinoris_DSM44614","Culcerans_NCTC12077","Culcerans_NCTC7910","Cvitaeruminis_DSM20294"	0.110791	0.110791	1.94887	0.110791	0.110791	1.94887	2306	0
ERS451417_01253	1717.62.peg.1261	NA	NA	NA	1	31	Catypicum_R2070,"Caurimucosum_ATCC700975","Cbelfantii_FRC0043","Ccamporealensis_DSM44610","Cdiphtheriae_NCTC11397","Cdoosanense_DSM45436","Cepidermidicanis_DSM45586","Cfalsenii_DSM44353","Chalotolerans_YIM70093","Chumireducens_DSM45392","Cimitans_DSM44264","Cjeikeium_K41","Ckroppenstedtii_DSM44385","Ckutscheri_DSM20755","Cmarinum_DSM44953","Cmaris_DSM45190","Cmustelae_DSM45274","Cpseudotuberculos…	0.205432	0.205432	1.65521	0.205432	0.205432	1.65521	2	2	1. 0.40353;2. 234;3. 700;4. 279;5. 279;6. 835;7. 378;8. 1132;9. 637;10. Q;11. CAA	1. 0.4888;2. 401;3. 1201;4. 448;5. 448;6. 1342;7. 547;8. 1639;9. 1093;10. I;11. ATC
ERS451417_00027	1717.62.peg.24	NA	NA	NA	1	32	Cargentoratense_DSM44202,"Catypicum_R2070","Caurimucosum_ATCC700975","Cbelfantii_FRC0043","Ccallunae_DSM20147","Cdeserti_GIMN1010","Cdiphtheriae_NCTC11397","Cdoosanense_DSM45436","Cefficiens_YS314","Cfalsenii_DSM44353","Cglutamicum_ATCC13032","Cglycinophilum_AJ3170","Chalotolerans_YIM70093","Cjeikeium_K41","Ckroppenstedtii_DSM44385","Ckutscheri_DSM20755","Cmustelae_DSM45274","Cpseudotuberculosis_…	0.205182	0.205182	1.94021	0.205182	0.205182	1.94021	258	0
ERS451417_00397	1717.62.peg.397	NA	NA	NA	1	39	Cargentoratense_DSM44202,"Catypicum_R2070","Caurimucosum_ATCC700975","Cbelfantii_FRC0043","Ccallunae_DSM20147","Ccamporealensis_DSM44610","Cdeserti_GIMN1010","Cdiphtheriae_NCTC11397","Cdoosanense_DSM45436","Cefficiens_YS314","Cepidermidicanis_DSM45586","Cfalsenii_DSM44353","Cglutamicum_ATCC13032","Cglycinophilum_AJ3170","Chalotolerans_YIM70093","Chumireducens_DSM45392","Cimitans_DSM44264","Cjeike…	0.15823	0.15823	1.64249	0.15823	0.15823	1.64249	258	0
ERS451417_01323	1717.62.peg.1331	NA	NA	NA	1	37	Cargentoratense_DSM44202,"Caurimucosum_ATCC700975","Cbelfantii_FRC0043","Ccallunae_DSM20147","Ccamporealensis_DSM44610","Cdeserti_GIMN1010","Cdiphtheriae_NCTC11397","Cdoosanense_DSM45436","Cefficiens_YS314","Cepidermidicanis_DSM45586","Cfalsenii_DSM44353","Cglutamicum_ATCC13032","Cglycinophilum_AJ3170","Chalotolerans_YIM70093","Chumireducens_DSM45392","Cimitans_DSM44264","Cjeikeium_K41","Ckroppen…	0.375276	0.289248	1.51146	0.375275	0.289247	1.51146	3074	2	1. 0.67049;2. 85;3. 253;4. 94;5. 94;6. 280;7. 101;8. 301;9. 148;10. D;11. GAT	1. 0.74276;2. 99;3. 295;4. 129;5. 129;6. 385;7. 136;8. 406;9. 184;10. V;11. GTT
ERS451417_00122	1717.62.peg.120	NA	NA	NA	1	8	Cbelfantii_FRC0043,"Cdiphtheriae_NCTC11397","Cpseudotuberculosis_31","Cpseudotuberculosis_ATCC19410","Crouxii_FRC0190","Csilvaticum_KL0182","Culcerans_NCTC12077","Culcerans_NCTC7910"	0.203829	0.203829	3.86098	0.203838	0.203838	3.8611	2050	3	1. 0.44277;2. 66;3. 196;4. 133;5. 76;6. 226;7. 76;8. 226;9. 190;10. R;11. CGC	1. 0.49013;2. 130;3. 388;4. 203;5. 140;6. 418;7. 140;8. 418;9. 382;10. I;11. ATC	1. 0.5036;2. 166;3. 496;4. 264;5. 176;6. 526;7. 177;8. 529;9. 463;10. D;11. GAT
ERS451417_00469	1717.62.peg.473	NA	NA	NA	1	12	Cbelfantii_FRC0043,"Cdiphtheriae_NCTC11397","Ckutscheri_DSM20755","Cmustelae_DSM45274","Cpseudotuberculosis_31","Cpseudotuberculosis_ATCC19410","Crouxii_FRC0190","Csilvaticum_KL0182","Culcerans_NCTC12077","Culcerans_NCTC7910","Cuterequi_DSM45634","Cvitaeruminis_DSM20294"	0.071594	0.0688861	2.55501	0.071594	0.0688861	2.55501	2	1	1. 0.50508;2. 18;3. 52;4. 32;5. 32;6. 94;7. 52;8. 154;9. 7;10. L;11. CTG
ERS451417_02122	1717.62.peg.2137	NA	NA	NA	1	38	Cargentoratense_DSM44202,"Catypicum_R2070","Caurimucosum_ATCC700975","Cbelfantii_FRC0043","Ccallunae_DSM20147","Ccamporealensis_DSM44610","Cdeserti_GIMN1010","Cdiphtheriae_NCTC11397","Cdoosanense_DSM45436","Cefficiens_YS314","Cepidermidicanis_DSM45586","Cfalsenii_DSM44353","Cglutamicum_ATCC13032","Cglycinophilum_AJ3170","Chalotolerans_YIM70093","Chumireducens_DSM45392","Cimitans_DSM44264","Cjeike…	0.160327	0.160327	1.8265	0.160327	0.160327	1.8265	1282	0
ERS451417_01658	1717.62.peg.1665	NA	NA	NA	1	24	Cargentoratense_DSM44202,"Cbelfantii_FRC0043","Ccallunae_DSM20147","Cdeserti_GIMN1010","Cdiphtheriae_NCTC11397","Cdoosanense_DSM45436","Cefficiens_YS314","Cepidermidicanis_DSM45586","Cglutamicum_ATCC13032","Chalotolerans_YIM70093","Chumireducens_DSM45392","Ckroppenstedtii_DSM44385","Ckutscheri_DSM20755","Clactis_RW25","Cmarinum_DSM44953","Cmaris_DSM45190","Cmustelae_DSM45274","Cpseudotuberculosis…	0.191627	0.191627	1.70529	0.191627	0.191627	1.70529	1026	1	1. 0.56264;2. 47;3. 139;4. 77;5. 72;6. 214;7. 92;8. 274;9. 25;10. S;11. TCA
ERS451417_02354	1717.62.peg.2382	NA	NA	NA	1	24	Catypicum_R2070,"Caurimucosum_ATCC700975","Cbelfantii_FRC0043","Ccamporealensis_DSM44610","Cdiphtheriae_NCTC11397","Cdoosanense_DSM45436","Cglycinophilum_AJ3170","Chalotolerans_YIM70093","Chumireducens_DSM45392","Cimitans_DSM44264","Cmarinum_DSM44953","Cmaris_DSM45190","Cmustelae_DSM45274","Cpseudotuberculosis_31","Cpseudotuberculosis_ATCC19410","CriegeliiPUDD83A45","Csilvaticum_KL0182","Csimulan…	0.148154	0.148154	2.33014	0.148154	0.148154	2.33014	1282	0
ERS451417_01682	1717.62.peg.1689	NA	NA	NA	1	11	Ccamporealensis_DSM44610,"Cdiphtheriae_NCTC11397","Cmaris_DSM45190","Cmustelae_DSM45274","Cpseudotuberculosis_31","Cpseudotuberculosis_ATCC19410","Culcerans_NCTC12077","Culcerans_NCTC7910","Cureicelerivorans_IMMIBRIV2301","Cuterequi_DSM45634","Cvitaeruminis_DSM20294"	0.348235	0.342789	1.75871	0.348235	0.342789	1.75871	4098	2	1. 0.49087;2. 69;3. 205;4. 98;5. 98;6. 292;7. 101;8. 301;9. 184;10. E;11. GAA	1. 0.74492;2. 494;3. 1480;4. 684;5. 588;6. 1762;7. 634;8. 1900;9. 1282;10. A;11. GCT
ERS451417_02150	1717.62.peg.2172	NA	NA	NA	1	8	Cbelfantii_FRC0043,"Cdiphtheriae_NCTC11397","Clactis_RW25","Cpseudotuberculosis_31","Cpseudotuberculosis_ATCC19410","Csilvaticum_KL0182","Culcerans_NCTC12077","Culcerans_NCTC7910"	0.0939266	0.0939266	3.01631	0.0939266	0.0939266	3.01631	258	0
ERS451417_00152	1717.62.peg.149	NA	NA	NA	1	38	Cargentoratense_DSM44202,"Catypicum_R2070","Caurimucosum_ATCC700975","Cbelfantii_FRC0043","Ccallunae_DSM20147","Ccamporealensis_DSM44610","Cdeserti_GIMN1010","Cdiphtheriae_NCTC11397","Cdoosanense_DSM45436","Cefficiens_YS314","Cepidermidicanis_DSM45586","Cfalsenii_DSM44353","Cglutamicum_ATCC13032","Cglycinophilum_AJ3170","Chalotolerans_YIM70093","Chumireducens_DSM45392","Cimitans_DSM44264","Cjeike…	0.133599	0.121229	2.0727	0.133599	0.121229	2.0727	1026	1	1. 0.6862;2. 197;3. 589;4. 227;5. 227;6. 679;7. 378;8. 1132;9. 496;10. D;11. GAT
ERS451417_00755	1717.62.peg.760	NA	NA	NA	1	39	Cargentoratense_DSM44202,"Catypicum_R2070","Caurimucosum_ATCC700975","Cbelfantii_FRC0043","Ccallunae_DSM20147","Ccamporealensis_DSM44610","Cdeserti_GIMN1010","Cdiphtheriae_NCTC11397","Cdoosanense_DSM45436","Cefficiens_YS314","Cepidermidicanis_DSM45586","Cfalsenii_DSM44353","Cglutamicum_ATCC13032","Cglycinophilum_AJ3170","Chalotolerans_YIM70093","Chumireducens_DSM45392","Cimitans_DSM44264","Cjeike…	0.350461	0.106177	2.23575	0.218714	0.105512	2.27288	258	0
ERS451417_02374	1717.62.peg.2404	NA	NA	NA	1	12	Cbelfantii_FRC0043,"Cdiphtheriae_NCTC11397","Cdoosanense_DSM45436","Chalotolerans_YIM70093","Chumireducens_DSM45392","Cmarinum_DSM44953","Cmaris_DSM45190","Cpseudotuberculosis_ATCC19410","Csilvaticum_KL0182","Culcerans_NCTC12077","Culcerans_NCTC7910","Cvitaeruminis_DSM20294"	0.195813	0.195813	2.10313	0.195813	0.195813	2.10313	3330	0
ERS451417_00057	1717.62.peg.52	NA	NA	NA	1	6	Caurimucosum_ATCC700975,"Cbelfantii_FRC0043","Cdiphtheriae_NCTC11397","Csingulare_IBSB52218","Culcerans_NCTC12077","Culcerans_NCTC7910"	0.385675	0.316413	5.71539	0.316837	0.316413	5.71539	4354	0
ERS451417_02352	1717.62.peg.2380	NA	NA	NA	1	5	Cbelfantii_FRC0043,"Cdiphtheriae_NCTC11397","Csilvaticum_KL0182","Culcerans_NCTC12077","Culcerans_NCTC7910"	0.242253	0.242253	2.39411	0.242253	0.242253	2.39411	2	1	1. 0.44926;2. 283;3. 847;4. 286;5. 286;6. 856;7. 286;8. 856;9. 727;10. E;11. GAG
ERS451417_01792	1717.62.peg.1797	NA	NA	NA	1	38	Cargentoratense_DSM44202,"Catypicum_R2070","Caurimucosum_ATCC700975","Cbelfantii_FRC0043","Ccallunae_DSM20147","Ccamporealensis_DSM44610","Cdeserti_GIMN1010","Cdiphtheriae_NCTC11397","Cdoosanense_DSM45436","Cefficiens_YS314","Cepidermidicanis_DSM45586","Cfalsenii_DSM44353","Cglutamicum_ATCC13032","Cglycinophilum_AJ3170","Chalotolerans_YIM70093","Chumireducens_DSM45392","Cimitans_DSM44264","Cjeike…	0.222347	0.222347	1.62673	0.222347	0.222347	1.62673	1026	1	1. 0.5733;2. 258;3. 772;4. 307;5. 307;6. 919;7. 505;8. 1513;9. 649;10. L;11. CTT
ERS451417_01351	1717.62.peg.1359	NA	NA	NA	1	38	Cargentoratense_DSM44202,"Catypicum_R2070","Caurimucosum_ATCC700975","Cbelfantii_FRC0043","Ccallunae_DSM20147","Ccamporealensis_DSM44610","Cdeserti_GIMN1010","Cdiphtheriae_NCTC11397","Cdoosanense_DSM45436","Cefficiens_YS314","Cepidermidicanis_DSM45586","Cfalsenii_DSM44353","Cglutamicum_ATCC13032","Cglycinophilum_AJ3170","Chalotolerans_YIM70093","Chumireducens_DSM45392","Cimitans_DSM44264","Cjeike…	0.139832	0.139832	1.555	0.139832	0.139832	1.555	1026	2	1. 0.44326;2. 186;3. 556;4. 208;5. 208;6. 622;7. 373;8. 1117;9. 385;10. I;11. ATT	1. 0.40548;2. 358;3. 1072;4. 389;5. 389;6. 1165;7. 577;8. 1729;9. 874;10. A;11. GCT
ERS451417_00673	1717.62.peg.680	NA	NA	NA	1	16	Cargentoratense_DSM44202,"Cbelfantii_FRC0043","Cdiphtheriae_NCTC11397","Cefficiens_YS314","Cepidermidicanis_DSM45586","Ckroppenstedtii_DSM44385","Ckutscheri_DSM20755","Clactis_RW25","Cmustelae_DSM45274","Cpseudotuberculosis_31","Cpseudotuberculosis_ATCC19410","Crouxii_FRC0190","Csilvaticum_KL0182","Culcerans_NCTC12077","Culcerans_NCTC7910","Cvitaeruminis_DSM20294"	0.199114	0.199114	1.88923	0.199114	0.199114	1.88922	258	0
ERS451417_02229	1717.62.peg.2254	NA	NA	NA	1	28	Catypicum_R2070,"Caurimucosum_ATCC700975","Cbelfantii_FRC0043","Ccallunae_DSM20147","Ccamporealensis_DSM44610","Cdeserti_GIMN1010","Cdiphtheriae_NCTC11397","Cdoosanense_DSM45436","Cepidermidicanis_DSM45586","Cfalsenii_DSM44353","Cglutamicum_ATCC13032","Chalotolerans_YIM70093","Chumireducens_DSM45392","Cimitans_DSM44264","Ckutscheri_DSM20755","Cmarinum_DSM44953","Cmaris_DSM45190","Cmustelae_DSM452…	0.243522	0.243522	1.62308	0.243522	0.243522	1.62309	6402	0
ERS451417_02393	1717.62.peg.2425	NA	NA	NA	1	9	Cbelfantii_FRC0043,"Cdiphtheriae_NCTC11397","Cmustelae_DSM45274","Cpseudotuberculosis_31","Cpseudotuberculosis_ATCC19410","Csilvaticum_KL0182","Culcerans_NCTC12077","Culcerans_NCTC7910","Cvitaeruminis_DSM20294"	0.134553	0.134553	2.49083	0.134553	0.134553	2.49083	3074	3	1. 0.41468;2. 70;3. 208;4. 178;5. 111;6. 331;7. 124;8. 370;9. 97;10. F;11. TTC	1. 0.82453;2. 173;3. 517;4. 352;5. 221;6. 661;7. 246;8. 736;9. 358;10. I;11. ATT	1. 0.40244;2. 671;3. 2011;4. 1054;5. 769;6. 2305;7. 864;8. 2590;9. 1492;10. R;11. CGC
ERS451417_00238	1717.62.peg.234	NA	NA	NA	1	37	Cargentoratense_DSM44202,"Catypicum_R2070","Caurimucosum_ATCC700975","Cbelfantii_FRC0043","Ccallunae_DSM20147","Ccamporealensis_DSM44610","Cdeserti_GIMN1010","Cdiphtheriae_NCTC11397","Cdoosanense_DSM45436","Cepidermidicanis_DSM45586","Cfalsenii_DSM44353","Cglutamicum_ATCC13032","Cglycinophilum_AJ3170","Chalotolerans_YIM70093","Chumireducens_DSM45392","Cimitans_DSM44264","Cjeikeium_K41","Ckroppens…	0.14966	0.14966	1.49498	0.14966	0.14966	1.49498	3330	0
ERS451417_01683	1717.62.peg.1690	NA	NA	NA	1	31	Caurimucosum_ATCC700975,"Cbelfantii_FRC0043","Ccallunae_DSM20147","Cdeserti_GIMN1010","Cdiphtheriae_NCTC11397","Cdoosanense_DSM45436","Cefficiens_YS314","Cepidermidicanis_DSM45586","Cfalsenii_DSM44353","Cglycinophilum_AJ3170","Chalotolerans_YIM70093","Cimitans_DSM44264","Cjeikeium_K41","Ckroppenstedtii_DSM44385","Ckutscheri_DSM20755","Clactis_RW25","Cmarinum_DSM44953","Cmaris_DSM45190","Cmustelae…	0.345307	0.266069	1.24129	0.345317	0.266079	1.24129	3074	1	1. 0.43107;2. 16;3. 46;4. 20;5. 20;6. 58;7. 23;8. 67;9. 25;10. E;11. GAA
ERS451417_00194	1717.62.peg.191	NA	NA	NA	1	19	Catypicum_R2070,"Cbelfantii_FRC0043","Ccamporealensis_DSM44610","Cdiphtheriae_NCTC11397","Cfalsenii_DSM44353","Ckroppenstedtii_DSM44385","Ckutscheri_DSM20755","Clactis_RW25","Cpseudotuberculosis_31","Cpseudotuberculosis_ATCC19410","CriegeliiPUDD83A45","Crouxii_FRC0190","Csilvaticum_KL0182","Csimulans_PES1","Ctestudinoris_DSM44614","Culcerans_NCTC12077","Culcerans_NCTC7910","Cuterequi_DSM45634","C…	0.178517	0.178517	1.98012	0.178517	0.178517	1.98012	258	0
ERS451417_00251	1717.62.peg.246	NA	NA	NA	1	8	Cbelfantii_FRC0043,"Cdiphtheriae_NCTC11397","Cpseudotuberculosis_31","Cpseudotuberculosis_ATCC19410","Crouxii_FRC0190","Csilvaticum_KL0182","Culcerans_NCTC12077","Culcerans_NCTC7910"	0.241236	0.241236	3.75269	0.241236	0.241236	3.75268	258	0
ERS451417_00261	1717.62.peg.255	NA	NA	NA	1	8	Cbelfantii_FRC0043,"Cdiphtheriae_NCTC11397","Cepidermidicanis_DSM45586","Cpseudotuberculosis_31","Cpseudotuberculosis_ATCC19410","Crouxii_FRC0190","Culcerans_NCTC12077","Culcerans_NCTC7910"	0.279728	0.279728	3.50947	0.279728	0.279728	3.50947	4354	0
ERS451417_02031	1717.62.peg.2036	NA	NA	NA	1	19	Caurimucosum_ATCC700975,"Cbelfantii_FRC0043","Ccamporealensis_DSM44610","Cdiphtheriae_NCTC11397","Cdoosanense_DSM45436","Chalotolerans_YIM70093","Chumireducens_DSM45392","Cimitans_DSM44264","Cmarinum_DSM44953","Cpseudotuberculosis_31","Cpseudotuberculosis_ATCC19410","CriegeliiPUDD83A45","Csilvaticum_KL0182","Csimulans_PES1","Csingulare_IBSB52218","Ctestudinoris_DSM44614","Culcerans_NCTC12077","Cu…	0.22989	0.22989	1.92706	0.22989	0.22989	1.92706	3074	1	1. 0.43264;2. 117;3. 349;4. 211;5. 156;6. 466;7. 208;8. 622;9. 187;10. A;11. GCC
ERS451417_01264	1717.62.peg.1272	NA	NA	NA	1	39	Cargentoratense_DSM44202,"Catypicum_R2070","Caurimucosum_ATCC700975","Cbelfantii_FRC0043","Ccallunae_DSM20147","Ccamporealensis_DSM44610","Cdeserti_GIMN1010","Cdiphtheriae_NCTC11397","Cdoosanense_DSM45436","Cefficiens_YS314","Cepidermidicanis_DSM45586","Cfalsenii_DSM44353","Cglutamicum_ATCC13032","Cglycinophilum_AJ3170","Chalotolerans_YIM70093","Chumireducens_DSM45392","Cimitans_DSM44264","Cjeike…	0.257484	0.257484	1.61867	0.257484	0.257484	1.61868	2	2	1. 0.4656;2. 168;3. 502;4. 181;5. 181;6. 541;7. 248;8. 742;9. 421;10. V;11. GTG	1. 0.43066;2. 257;3. 769;4. 271;5. 271;6. 811;7. 339;8. 1015;9. 682;10. S;11. TCC
ERS451417_01797	1717.62.peg.1802	NA	NA	NA	1	38	Cargentoratense_DSM44202,"Catypicum_R2070","Caurimucosum_ATCC700975","Cbelfantii_FRC0043","Ccallunae_DSM20147","Ccamporealensis_DSM44610","Cdeserti_GIMN1010","Cdiphtheriae_NCTC11397","Cdoosanense_DSM45436","Cefficiens_YS314","Cepidermidicanis_DSM45586","Cfalsenii_DSM44353","Cglutamicum_ATCC13032","Cglycinophilum_AJ3170","Chalotolerans_YIM70093","Chumireducens_DSM45392","Cimitans_DSM44264","Cjeike…	0.677285	0.247827	1.68349	0.3738	0.247827	1.68349	258	0
ERS451417_00336	1717.62.peg.338	NA	NA	NA	1	39	Cargentoratense_DSM44202,"Catypicum_R2070","Caurimucosum_ATCC700975","Cbelfantii_FRC0043","Ccallunae_DSM20147","Ccamporealensis_DSM44610","Cdeserti_GIMN1010","Cdiphtheriae_NCTC11397","Cdoosanense_DSM45436","Cefficiens_YS314","Cepidermidicanis_DSM45586","Cfalsenii_DSM44353","Cglutamicum_ATCC13032","Cglycinophilum_AJ3170","Chalotolerans_YIM70093","Chumireducens_DSM45392","Cimitans_DSM44264","Cjeike…	0.141156	0.141156	1.57295	0.141156	0.141156	1.57295	1282	0
ERS451417_00470	1717.62.peg.474	NA	NA	NA	1	8	Cbelfantii_FRC0043,"Cdiphtheriae_NCTC11397","Cpseudotuberculosis_31","Cpseudotuberculosis_ATCC19410","Crouxii_FRC0190","Csilvaticum_KL0182","Culcerans_NCTC12077","Culcerans_NCTC7910"	0.163821	0.163821	3.00932	0.220465	0.164676	3.06564	2	5	1. 0.53999;2. 31;3. 91;4. 37;5. 33;6. 97;7. 33;8. 97;9. 91;10. V;11. GTG	1. 0.45031;2. 32;3. 94;4. 38;5. 34;6. 100;7. 34;8. 100;9. 94;10. Q;11. CAA	1. 0.665;2. 34;3. 100;4. 40;5. 36;6. 106;7. 36;8. 106;9. 100;10. T;11. ACA	1. 0.61627;2. 44;3. 130;4. 50;5. 46;6. 136;7. 46;8. 136;9. 130;10. G;11. GGG	1. 0.84629;2. 104;3. 310;4. 112;5. 108;6. 322;7. 110;8. 328;9. 286;10. A;11. GCT
ERS451417_00494	1717.62.peg.497	NA	NA	NA	1	38	Cargentoratense_DSM44202,"Catypicum_R2070","Caurimucosum_ATCC700975","Cbelfantii_FRC0043","Ccallunae_DSM20147","Ccamporealensis_DSM44610","Cdeserti_GIMN1010","Cdiphtheriae_NCTC11397","Cdoosanense_DSM45436","Cefficiens_YS314","Cepidermidicanis_DSM45586","Cfalsenii_DSM44353","Cglutamicum_ATCC13032","Cglycinophilum_AJ3170","Chalotolerans_YIM70093","Chumireducens_DSM45392","Cimitans_DSM44264","Cjeike…	0.311522	0.311522	1.26425	0.311522	0.311522	1.26425	258	0
ERS451417_00519	1717.62.peg.523	NA	NA	NA	1	8	Cbelfantii_FRC0043,"Cdiphtheriae_NCTC11397","Clactis_RW25","Cpseudotuberculosis_31","Cpseudotuberculosis_ATCC19410","Csilvaticum_KL0182","Culcerans_NCTC12077","Culcerans_NCTC7910"	0.1541	0.1541	3.4647	0.1541	0.1541	3.4647	258	0
ERS451417_01781	1717.62.peg.1786	NA	NA	NA	1	11	Cbelfantii_FRC0043,"Cdiphtheriae_NCTC11397","Chalotolerans_YIM70093","Ckutscheri_DSM20755","Cmustelae_DSM45274","Cpseudotuberculosis_31","Cpseudotuberculosis_ATCC19410","Csilvaticum_KL0182","Culcerans_NCTC12077","Culcerans_NCTC7910","Cvitaeruminis_DSM20294"	0.142964	0.142964	2.14768	0.142964	0.142964	2.14769	3330	0
ERS451417_00510	1717.62.peg.514	NA	NA	NA	1	39	Cargentoratense_DSM44202,"Catypicum_R2070","Caurimucosum_ATCC700975","Cbelfantii_FRC0043","Ccallunae_DSM20147","Ccamporealensis_DSM44610","Cdeserti_GIMN1010","Cdiphtheriae_NCTC11397","Cdoosanense_DSM45436","Cefficiens_YS314","Cepidermidicanis_DSM45586","Cfalsenii_DSM44353","Cglutamicum_ATCC13032","Cglycinophilum_AJ3170","Chalotolerans_YIM70093","Chumireducens_DSM45392","Cimitans_DSM44264","Cjeike…	0.158306	0.158306	1.85962	0.158306	0.158306	1.85962	2306	0
ERS451417_02214	1717.62.peg.2238	NA	NA	NA	1	11	Cbelfantii_FRC0043,"Cdiphtheriae_NCTC11397","Chumireducens_DSM45392","Cmarinum_DSM44953","Cpseudotuberculosis_31","Cpseudotuberculosis_ATCC19410","Csilvaticum_KL0182","Ctestudinoris_DSM44614","Culcerans_NCTC12077","Culcerans_NCTC7910","Cvitaeruminis_DSM20294"	0.072013	0.072013	2.19452	0.072013	0.072013	2.19452	2	2	1. 0.45671;2. 216;3. 646;4. 295;5. 220;6. 658;7. 220;8. 658;9. 601;10. T;11. ACG	1. 0.47616;2. 317;3. 949;4. 399;5. 321;6. 961;7. 325;8. 973;9. 871;10. I;11. ATT
ERS451417_02370	1717.62.peg.2400	NA	NA	NA	1	8	Caurimucosum_ATCC700975,"Cbelfantii_FRC0043","Cdiphtheriae_NCTC11397","Cpseudotuberculosis_31","Cpseudotuberculosis_ATCC19410","Csilvaticum_KL0182","Culcerans_NCTC12077","Culcerans_NCTC7910"	0.182633	0.182633	2.49044	0.182633	0.182633	2.49044	2306	0
ERS451417_01233	1717.62.peg.1241	NA	NA	NA	1	14	Cargentoratense_DSM44202,"Cbelfantii_FRC0043","Cdiphtheriae_NCTC11397","Cepidermidicanis_DSM45586","Ckutscheri_DSM20755","Clactis_RW25","Cmustelae_DSM45274","Cpseudotuberculosis_31","Cpseudotuberculosis_ATCC19410","Crouxii_FRC0190","Csilvaticum_KL0182","Culcerans_NCTC12077","Culcerans_NCTC7910","Cvitaeruminis_DSM20294"	0.152791	0.152791	2.84351	0.152791	0.152791	2.84373	258	0
ERS451417_00979	1717.62.peg.989	NA	NA	NA	1	36	Cargentoratense_DSM44202,"Catypicum_R2070","Caurimucosum_ATCC700975","Cbelfantii_FRC0043","Ccallunae_DSM20147","Ccamporealensis_DSM44610","Cdeserti_GIMN1010","Cdiphtheriae_NCTC11397","Cdoosanense_DSM45436","Cefficiens_YS314","Cepidermidicanis_DSM45586","Cfalsenii_DSM44353","Cglutamicum_ATCC13032","Cglycinophilum_AJ3170","Chalotolerans_YIM70093","Chumireducens_DSM45392","Cjeikeium_K41","Ckroppenst…	0.168962	0.168962	1.53882	0.168962	0.168962	1.53882	2050	1	1. 0.63789;2. 235;3. 703;4. 244;5. 243;6. 727;7. 254;8. 760;9. 586;10. P;11. CCA
ERS451417_00216	1717.62.peg.213	NA	NA	NA	1	23	Catypicum_R2070,"Cbelfantii_FRC0043","Ccallunae_DSM20147","Ccamporealensis_DSM44610","Cdeserti_GIMN1010","Cdiphtheriae_NCTC11397","Cdoosanense_DSM45436","Cglutamicum_ATCC13032","Chumireducens_DSM45392","Cimitans_DSM44264","Ckutscheri_DSM20755","Cmarinum_DSM44953","Cmustelae_DSM45274","Cpseudotuberculosis_31","Cpseudotuberculosis_ATCC19410","CriegeliiPUDD83A45","Crouxii_FRC0190","Csilvaticum_KL018…	0.207786	0.20775	1.33601	0.209752	0.207749	1.33601	258	0
ERS451417_01166	1717.62.peg.1177	NA	NA	NA	1	39	Cargentoratense_DSM44202,"Catypicum_R2070","Caurimucosum_ATCC700975","Cbelfantii_FRC0043","Ccallunae_DSM20147","Ccamporealensis_DSM44610","Cdeserti_GIMN1010","Cdiphtheriae_NCTC11397","Cdoosanense_DSM45436","Cefficiens_YS314","Cepidermidicanis_DSM45586","Cfalsenii_DSM44353","Cglutamicum_ATCC13032","Cglycinophilum_AJ3170","Chalotolerans_YIM70093","Chumireducens_DSM45392","Cimitans_DSM44264","Cjeike…	0.104388	0.104388	1.84296	0.104388	0.104388	1.84297	258	0
ERS451417_01278	1717.62.peg.1286	NA	NA	NA	1	23	Catypicum_R2070,"Ccallunae_DSM20147","Cdeserti_GIMN1010","Cdiphtheriae_NCTC11397","Cdoosanense_DSM45436","Cefficiens_YS314","Cglutamicum_ATCC13032","Chalotolerans_YIM70093","Chumireducens_DSM45392","Ckutscheri_DSM20755","Cmarinum_DSM44953","Cmaris_DSM45190","Cmustelae_DSM45274","Cpseudotuberculosis_31","Cpseudotuberculosis_ATCC19410","CriegeliiPUDD83A45","Crouxii_FRC0190","Csilvaticum_KL0182","Ct…	0.260918	0.260918	1.76219	0.260918	0.260918	1.7622	2	1	1. 0.49248;2. 92;3. 274;4. 110;5. 100;6. 298;7. 111;8. 331;9. 235;10. V;11. GTT
ERS451417_01303	1717.62.peg.1311	NA	NA	NA	1	38	Cargentoratense_DSM44202,"Catypicum_R2070","Caurimucosum_ATCC700975","Cbelfantii_FRC0043","Ccallunae_DSM20147","Ccamporealensis_DSM44610","Cdeserti_GIMN1010","Cdiphtheriae_NCTC11397","Cdoosanense_DSM45436","Cefficiens_YS314","Cepidermidicanis_DSM45586","Cfalsenii_DSM44353","Cglutamicum_ATCC13032","Cglycinophilum_AJ3170","Chalotolerans_YIM70093","Chumireducens_DSM45392","Cimitans_DSM44264","Cjeike…	0.228724	0.228724	1.46957	0.228724	0.228724	1.46957	258	0
ERS451417_01037	1717.62.peg.1047	NA	NA	NA	1	32	Caurimucosum_ATCC700975,"Cbelfantii_FRC0043","Ccallunae_DSM20147","Ccamporealensis_DSM44610","Cdeserti_GIMN1010","Cdiphtheriae_NCTC11397","Cdoosanense_DSM45436","Cefficiens_YS314","Cfalsenii_DSM44353","Cglutamicum_ATCC13032","Cglycinophilum_AJ3170","Chalotolerans_YIM70093","Chumireducens_DSM45392","Cimitans_DSM44264","Cjeikeium_K41","Ckutscheri_DSM20755","Clactis_RW25","Cmarinum_DSM44953","Cmaris…	0.244615	0.244615	1.62319	0.244615	0.244615	1.62319	3074	4	1. 0.43309;2. 91;3. 271;4. 128;5. 128;6. 382;7. 290;8. 868;9. 175;10. L;11. CTT	1. 0.47103;2. 312;3. 934;4. 377;5. 377;6. 1129;7. 571;8. 1711;9. 604;10. E;11. GAG	1. 0.42908;2. 564;3. 1690;4. 641;5. 641;6. 1921;7. 874;8. 2620;9. 1186;10. L;11. CTT	1. 0.43237;2. 568;3. 1702;4. 646;5. 646;6. 1936;7. 879;8. 2635;9. 1195;10. G;11. GGG
ERS451417_01892	1717.62.peg.1891	NA	NA	NA	1	17	Cargentoratense_DSM44202,"Cbelfantii_FRC0043","Ccallunae_DSM20147","Cdiphtheriae_NCTC11397","Cefficiens_YS314","Cepidermidicanis_DSM45586","Cglutamicum_ATCC13032","Ckroppenstedtii_DSM44385","Ckutscheri_DSM20755","Clactis_RW25","Cmustelae_DSM45274","Cpseudotuberculosis_31","Cpseudotuberculosis_ATCC19410","Csilvaticum_KL0182","Culcerans_NCTC12077","Culcerans_NCTC7910","Cvitaeruminis_DSM20294"	0.157833	0.157833	2.41808	0.157843	0.157843	2.41809	258	0
ERS451417_01587	1717.62.peg.1596	NA	NA	NA	1	36	Cargentoratense_DSM44202,"Caurimucosum_ATCC700975","Cbelfantii_FRC0043","Ccallunae_DSM20147","Ccamporealensis_DSM44610","Cdeserti_GIMN1010","Cdiphtheriae_NCTC11397","Cdoosanense_DSM45436","Cefficiens_YS314","Cepidermidicanis_DSM45586","Cfalsenii_DSM44353","Cglutamicum_ATCC13032","Cglycinophilum_AJ3170","Chalotolerans_YIM70093","Chumireducens_DSM45392","Cimitans_DSM44264","Cjeikeium_K41","Ckroppen…	0.254316	0.254316	1.61823	0.254316	0.254316	1.61821	2	1	1. 0.48957;2. 40;3. 118;4. 66;5. 66;6. 196;7. 120;8. 358;9. 91;10. P;11. CCG
ERS451417_01814	1717.62.peg.1819	NA	NA	NA	1	38	Cargentoratense_DSM44202,"Catypicum_R2070","Caurimucosum_ATCC700975","Cbelfantii_FRC0043","Ccallunae_DSM20147","Ccamporealensis_DSM44610","Cdeserti_GIMN1010","Cdiphtheriae_NCTC11397","Cdoosanense_DSM45436","Cefficiens_YS314","Cepidermidicanis_DSM45586","Cfalsenii_DSM44353","Cglutamicum_ATCC13032","Cglycinophilum_AJ3170","Chalotolerans_YIM70093","Chumireducens_DSM45392","Cimitans_DSM44264","Cjeike…	0.141722	0.141722	1.90399	0.141722	0.141722	1.90399	258	0
ERS451417_00135	1717.62.peg.134	NA	NA	NA	1	14	Caurimucosum_ATCC700975,"Cbelfantii_FRC0043","Ccamporealensis_DSM44610","Cdiphtheriae_NCTC11397","Chumireducens_DSM45392","Cmaris_DSM45190","Cmustelae_DSM45274","Cpseudotuberculosis_31","Crouxii_FRC0190","Csilvaticum_KL0182","Csingulare_IBSB52218","Culcerans_NCTC12077","Culcerans_NCTC7910","Cuterequi_DSM45634"	0.0578661	0.0578661	1.78325	0.0578661	0.0578661	1.78325	2306	0
ERS451417_00553	1717.62.peg.557	NA	NA	NA	1	7	Cbelfantii_FRC0043,"Cdiphtheriae_NCTC11397","Cpseudotuberculosis_ATCC19410","Crouxii_FRC0190","Csilvaticum_KL0182","Culcerans_NCTC12077","Culcerans_NCTC7910"	0.108411	0.108411	3.07819	0.108411	0.108411	3.07819	2050	3	1. 0.41949;2. 157;3. 469;4. 165;5. 157;6. 469;7. 157;8. 469;9. 307;10. I;11. ATT	1. 0.44186;2. 191;3. 571;4. 199;5. 191;6. 571;7. 191;8. 571;9. 409;10. I;11. ATC	1. 0.47316;2. 381;3. 1141;4. 427;5. 381;6. 1141;7. 381;8. 1141;9. 931;10. H;11. CAT
ERS451417_00460	1717.62.peg.464	NA	NA	NA	1	39	Cargentoratense_DSM44202,"Catypicum_R2070","Caurimucosum_ATCC700975","Cbelfantii_FRC0043","Ccallunae_DSM20147","Ccamporealensis_DSM44610","Cdeserti_GIMN1010","Cdiphtheriae_NCTC11397","Cdoosanense_DSM45436","Cefficiens_YS314","Cepidermidicanis_DSM45586","Cfalsenii_DSM44353","Cglutamicum_ATCC13032","Cglycinophilum_AJ3170","Chalotolerans_YIM70093","Chumireducens_DSM45392","Cimitans_DSM44264","Cjeike…	0.0963654	0.0963654	1.78677	0.0963654	0.0963654	1.78676	1282	0
ERS451417_00795	1717.62.peg.801	NA	NA	NA	1	30	Caurimucosum_ATCC700975,"Cbelfantii_FRC0043","Ccallunae_DSM20147","Cdeserti_GIMN1010","Cdiphtheriae_NCTC11397","Cdoosanense_DSM45436","Cepidermidicanis_DSM45586","Cglutamicum_ATCC13032","Cglycinophilum_AJ3170","Chalotolerans_YIM70093","Chumireducens_DSM45392","Cimitans_DSM44264","Ckutscheri_DSM20755","Cmarinum_DSM44953","Cmaris_DSM45190","Cmustelae_DSM45274","Cpseudotuberculosis_31","Cpseudotuber…	0.279348	0.279348	1.92638	0.279357	0.279357	1.92638	258	0
ERS451417_01056	1717.62.peg.1067	NA	NA	NA	1	38	Cargentoratense_DSM44202,"Catypicum_R2070","Caurimucosum_ATCC700975","Cbelfantii_FRC0043","Ccallunae_DSM20147","Ccamporealensis_DSM44610","Cdeserti_GIMN1010","Cdiphtheriae_NCTC11397","Cdoosanense_DSM45436","Cefficiens_YS314","Cepidermidicanis_DSM45586","Cfalsenii_DSM44353","Cglutamicum_ATCC13032","Cglycinophilum_AJ3170","Chalotolerans_YIM70093","Chumireducens_DSM45392","Cimitans_DSM44264","Cjeike…	0.121336	0.121336	1.79194	0.121336	0.121336	1.79194	1282	0
ERS451417_02284	1717.62.peg.2313	NA	NA	NA	1	16	Catypicum_R2070,"Caurimucosum_ATCC700975","Cbelfantii_FRC0043","Cdiphtheriae_NCTC11397","Ckutscheri_DSM20755","Clactis_RW25","Cpseudotuberculosis_31","Cpseudotuberculosis_ATCC19410","CriegeliiPUDD83A45","Csilvaticum_KL0182","Csimulans_PES1","Csingulare_IBSB52218","Culcerans_NCTC12077","Culcerans_NCTC7910","Curealyticum_DSM7109","Cuterequi_DSM45634"	0.171699	0.171699	2.62148	0.171699	0.171699	2.62148	3330	0
ERS451417_01305	1717.62.peg.1313	NA	NA	NA	1	28	Cargentoratense_DSM44202,"Caurimucosum_ATCC700975","Cbelfantii_FRC0043","Ccallunae_DSM20147","Cdeserti_GIMN1010","Cdiphtheriae_NCTC11397","Cdoosanense_DSM45436","Cefficiens_YS314","Cepidermidicanis_DSM45586","Cfalsenii_DSM44353","Cglutamicum_ATCC13032","Chalotolerans_YIM70093","Chumireducens_DSM45392","Cjeikeium_K41","Clactis_RW25","Cmarinum_DSM44953","Cmaris_DSM45190","Cmustelae_DSM45274","Cpseu…	0.189563	0.189563	1.6528	0.189563	0.189563	1.6528	3330	0
ERS451417_00256	1717.62.peg.251	NA	NA	NA	1	39	Cargentoratense_DSM44202,"Catypicum_R2070","Caurimucosum_ATCC700975","Cbelfantii_FRC0043","Ccallunae_DSM20147","Ccamporealensis_DSM44610","Cdeserti_GIMN1010","Cdiphtheriae_NCTC11397","Cdoosanense_DSM45436","Cefficiens_YS314","Cepidermidicanis_DSM45586","Cfalsenii_DSM44353","Cglutamicum_ATCC13032","Cglycinophilum_AJ3170","Chalotolerans_YIM70093","Chumireducens_DSM45392","Cimitans_DSM44264","Cjeike…	0.132014	0.132014	1.77325	0.132014	0.132014	1.77325	2	2	1. 0.6165;2. 51;3. 151;4. 98;5. 98;6. 292;7. 134;8. 400;9. 121;10. A;11. GCT	1. 0.62506;2. 77;3. 229;4. 124;5. 124;6. 370;7. 160;8. 478;9. 199;10. P;11. CCA
ERS451417_01363	1717.62.peg.1371	NA	NA	NA	1	30	Cargentoratense_DSM44202,"Caurimucosum_ATCC700975","Cbelfantii_FRC0043","Ccallunae_DSM20147","Ccamporealensis_DSM44610","Cdeserti_GIMN1010","Cdiphtheriae_NCTC11397","Cdoosanense_DSM45436","Cefficiens_YS314","Cglutamicum_ATCC13032","Cglycinophilum_AJ3170","Chalotolerans_YIM70093","Chumireducens_DSM45392","Cimitans_DSM44264","Ckutscheri_DSM20755","Clactis_RW25","Cmarinum_DSM44953","Cmaris_DSM45190"…	0.302967	0.256281	1.65791	0.302967	0.256281	1.65791	2	2	1. 0.68661;2. 114;3. 340;4. 123;5. 123;6. 367;7. 133;8. 397;9. 250;10. Q;11. CAA	1. 0.48147;2. 159;3. 475;4. 168;5. 168;6. 502;7. 178;8. 532;9. 385;10. A;11. GCT
ERS451417_01357	1717.62.peg.1365	NA	NA	NA	1	17	Catypicum_R2070,"Cbelfantii_FRC0043","Cdiphtheriae_NCTC11397","Cdoosanense_DSM45436","Cepidermidicanis_DSM45586","Cglutamicum_ATCC13032","Chalotolerans_YIM70093","Chumireducens_DSM45392","Cimitans_DSM44264","Cmustelae_DSM45274","Cpseudotuberculosis_31","Cpseudotuberculosis_ATCC19410","Csilvaticum_KL0182","Ctestudinoris_DSM44614","Culcerans_NCTC12077","Culcerans_NCTC7910","Cvitaeruminis_DSM20294"	0.280606	0.280606	1.83178	0.280606	0.280606	1.83178	3330	0
ERS451417_00298	1717.62.peg.299	NA	NA	NA	1	38	Cargentoratense_DSM44202,"Catypicum_R2070","Caurimucosum_ATCC700975","Cbelfantii_FRC0043","Ccallunae_DSM20147","Ccamporealensis_DSM44610","Cdeserti_GIMN1010","Cdiphtheriae_NCTC11397","Cdoosanense_DSM45436","Cefficiens_YS314","Cepidermidicanis_DSM45586","Cfalsenii_DSM44353","Cglutamicum_ATCC13032","Cglycinophilum_AJ3170","Chalotolerans_YIM70093","Chumireducens_DSM45392","Cimitans_DSM44264","Cjeike…	0.200553	0.200553	1.73465	0.200553	0.200553	1.73465	1026	1	1. 0.48382;2. 19;3. 55;4. 69;5. 69;6. 205;7. 263;8. 787;9. 22;10. A;11. GCA
ERS451417_01406	1717.62.peg.1419	NA	NA	NA	1	10	Cbelfantii_FRC0043,"Cdiphtheriae_NCTC11397","Ckutscheri_DSM20755","Cmustelae_DSM45274","Cpseudotuberculosis_31","Cpseudotuberculosis_ATCC19410","Csilvaticum_KL0182","Culcerans_NCTC12077","Culcerans_NCTC7910","Cvitaeruminis_DSM20294"	0.503946	0.140943	1.8047	0.503946	0.140943	1.8047	2050	1	1. 0.88113;2. 180;3. 538;4. 230;5. 185;6. 553;7. 190;8. 568;9. 448;10. N;11. AAC
ERS451417_00632	1717.62.peg.636	NA	NA	NA	1	9	Cbelfantii_FRC0043,"Cdiphtheriae_NCTC11397","Cpseudotuberculosis_31","Cpseudotuberculosis_ATCC19410","Crouxii_FRC0190","Csilvaticum_KL0182","Culcerans_NCTC12077","Culcerans_NCTC7910","Cvitaeruminis_DSM20294"	0.112459	0.112459	2.7809	0.112459	0.112459	2.7809	2	2	1. 0.91436;2. 39;3. 115;4. 126;5. 87;6. 259;7. 94;8. 280;9. 112;10. I;11. ATA	1. 0.4672;2. 141;3. 421;4. 284;5. 193;6. 577;7. 205;8. 613;9. 379;10. A;11. GCC
ERS451417_00250	1717.62.peg.245	NA	NA	NA	1	8	Cbelfantii_FRC0043,"Cdiphtheriae_NCTC11397","Cpseudotuberculosis_31","Cpseudotuberculosis_ATCC19410","Crouxii_FRC0190","Csilvaticum_KL0182","Culcerans_NCTC12077","Culcerans_NCTC7910"	0.165098	0.165098	5.21488	0.165098	0.165098	5.21488	2306	0
ERS451417_00398	1717.62.peg.398	NA	NA	NA	1	39	Cargentoratense_DSM44202,"Catypicum_R2070","Caurimucosum_ATCC700975","Cbelfantii_FRC0043","Ccallunae_DSM20147","Ccamporealensis_DSM44610","Cdeserti_GIMN1010","Cdiphtheriae_NCTC11397","Cdoosanense_DSM45436","Cefficiens_YS314","Cepidermidicanis_DSM45586","Cfalsenii_DSM44353","Cglutamicum_ATCC13032","Cglycinophilum_AJ3170","Chalotolerans_YIM70093","Chumireducens_DSM45392","Cimitans_DSM44264","Cjeike…	0.500689	0.131688	1.67139	0.249744	0.131677	1.67139	258	0
ERS451417_01341	1717.62.peg.1349	NA	NA	NA	1	35	Cargentoratense_DSM44202,"Catypicum_R2070","Caurimucosum_ATCC700975","Cbelfantii_FRC0043","Ccallunae_DSM20147","Ccamporealensis_DSM44610","Cdeserti_GIMN1010","Cdiphtheriae_NCTC11397","Cdoosanense_DSM45436","Cefficiens_YS314","Cepidermidicanis_DSM45586","Cfalsenii_DSM44353","Cglutamicum_ATCC13032","Cglycinophilum_AJ3170","Chalotolerans_YIM70093","Chumireducens_DSM45392","Cimitans_DSM44264","Ckropp…	0.160481	0.160481	1.45544	0.160481	0.160481	1.45543	3330	0
ERS451417_01398	1717.62.peg.1411	NA	NA	NA	1	11	Cargentoratense_DSM44202,"Cbelfantii_FRC0043","Cdiphtheriae_NCTC11397","Cepidermidicanis_DSM45586","Cimitans_DSM44264","Cpseudotuberculosis_31","Cpseudotuberculosis_ATCC19410","Csilvaticum_KL0182","Culcerans_NCTC12077","Culcerans_NCTC7910","Cureicelerivorans_IMMIBRIV2301"	0.319345	0.319345	2.08182	0.319345	0.319345	2.08182	3330	0
ERS451417_00528	1717.62.peg.531	NA	NA	NA	1	9	Cbelfantii_FRC0043,"Cdiphtheriae_NCTC11397","Ckutscheri_DSM20755","Cpseudotuberculosis_31","Cpseudotuberculosis_ATCC19410","Crouxii_FRC0190","Culcerans_NCTC12077","Culcerans_NCTC7910","Cvitaeruminis_DSM20294"	0.153704	0.153704	2.81496	0.153704	0.153704	2.815	6402	0
ERS451417_00139	1717.62.peg.138	NA	NA	NA	1	9	Cbelfantii_FRC0043,"Cdiphtheriae_NCTC11397","Cpseudotuberculosis_31","Cpseudotuberculosis_ATCC19410","Crouxii_FRC0190","Csilvaticum_KL0182","Culcerans_NCTC12077","Culcerans_NCTC7910","Cvitaeruminis_DSM20294"	0.0891542	0.0891542	2.61074	0.0891542	0.0891542	2.61074	2306	0
ERS451417_00252	1717.62.peg.247	NA	NA	NA	1	10	Cargentoratense_DSM44202,"Cbelfantii_FRC0043","Cdiphtheriae_NCTC11397","Ckutscheri_DSM20755","Cmustelae_DSM45274","Cpseudotuberculosis_ATCC19410","Crouxii_FRC0190","Csilvaticum_KL0182","Culcerans_NCTC12077","Culcerans_NCTC7910"	0.930534	0.0908375	2.31272	0.0915182	0.0915182	2.29055	3328	0
ERS451417_01591	1717.62.peg.1600	NA	NA	NA	1	7	Cbelfantii_FRC0043,"Cdiphtheriae_NCTC11397","Cpseudotuberculosis_31","Cpseudotuberculosis_ATCC19410","Csilvaticum_KL0182","Culcerans_NCTC12077","Culcerans_NCTC7910"	0.110737	0.110737	2.26623	0.110737	0.110737	2.26623	2	2	1. 0.95319;2. 52;3. 154;4. 82;5. 55;6. 163;7. 52;8. 154;9. 130;10. A;11. GCA	1. 0.42366;2. 111;3. 331;4. 166;5. 116;6. 346;7. 120;8. 358;9. 226;10. E;11. GAA
ERS451417_00008	1717.62.peg.9	NA	NA	NA	1	28	Cargentoratense_DSM44202,"Catypicum_R2070","Caurimucosum_ATCC700975","Cbelfantii_FRC0043","Ccallunae_DSM20147","Cdeserti_GIMN1010","Cdiphtheriae_NCTC11397","Cdoosanense_DSM45436","Cefficiens_YS314","Cepidermidicanis_DSM45586","Chalotolerans_YIM70093","Chumireducens_DSM45392","Cimitans_DSM44264","Ckroppenstedtii_DSM44385","Ckutscheri_DSM20755","Cmarinum_DSM44953","Cmaris_DSM45190","Cpseudotubercul…	0.201803	0.201803	1.64759	0.201803	0.201803	1.64759	258	0
ERS451417_01943	1717.62.peg.1941	NA	NA	NA	1	12	Cbelfantii_FRC0043,"Cdiphtheriae_NCTC11397","Cjeikeium_K41","Ckutscheri_DSM20755","Clactis_RW25","Cpseudotuberculosis_31","Cpseudotuberculosis_ATCC19410","CriegeliiPUDD83A45","Csilvaticum_KL0182","Csimulans_PES1","Culcerans_NCTC12077","Culcerans_NCTC7910"	0.191755	0.191755	2.87612	0.191755	0.191755	2.87612	1282	0
ERS451417_01155	1717.62.peg.1166	NA	NA	NA	1	39	Cargentoratense_DSM44202,"Catypicum_R2070","Caurimucosum_ATCC700975","Cbelfantii_FRC0043","Ccallunae_DSM20147","Ccamporealensis_DSM44610","Cdeserti_GIMN1010","Cdiphtheriae_NCTC11397","Cdoosanense_DSM45436","Cefficiens_YS314","Cepidermidicanis_DSM45586","Cfalsenii_DSM44353","Cglutamicum_ATCC13032","Cglycinophilum_AJ3170","Chalotolerans_YIM70093","Chumireducens_DSM45392","Cimitans_DSM44264","Cjeike…	0.0658143	0.0658143	1.55708	0.0658143	0.0658143	1.55707	258	0
ERS451417_00894	1717.62.peg.900	NA	NA	NA	1	36	Cargentoratense_DSM44202,"Catypicum_R2070","Caurimucosum_ATCC700975","Cbelfantii_FRC0043","Ccallunae_DSM20147","Ccamporealensis_DSM44610","Cdeserti_GIMN1010","Cdiphtheriae_NCTC11397","Cdoosanense_DSM45436","Cefficiens_YS314","Cepidermidicanis_DSM45586","Cfalsenii_DSM44353","Cglutamicum_ATCC13032","Chalotolerans_YIM70093","Chumireducens_DSM45392","Cimitans_DSM44264","Cjeikeium_K41","Ckroppenstedti…	0.119738	0.119738	1.8978	0.119738	0.119738	1.8978	2	2	1. 0.67135;2. 196;3. 586;4. 222;5. 222;6. 664;7. 227;8. 679;9. 457;10. K;11. AAA	1. 0.64605;2. 202;3. 604;4. 228;5. 228;6. 682;7. 233;8. 697;9. 475;10. V;11. GTC
ERS451417_01517	1717.62.peg.1525	NA	NA	NA	1	38	Cargentoratense_DSM44202,"Catypicum_R2070","Caurimucosum_ATCC700975","Cbelfantii_FRC0043","Ccallunae_DSM20147","Ccamporealensis_DSM44610","Cdeserti_GIMN1010","Cdiphtheriae_NCTC11397","Cdoosanense_DSM45436","Cefficiens_YS314","Cepidermidicanis_DSM45586","Cfalsenii_DSM44353","Cglutamicum_ATCC13032","Cglycinophilum_AJ3170","Chalotolerans_YIM70093","Chumireducens_DSM45392","Cimitans_DSM44264","Cjeike…	0.224165	0.224165	1.70277	0.224165	0.224165	1.70277	2	1	1. 0.5405;2. 283;3. 847;4. 311;5. 311;6. 931;7. 351;8. 1051;9. 805;10. I;11. ATT
ERS451417_01160	1717.62.peg.1171	NA	NA	NA	1	37	Cargentoratense_DSM44202,"Caurimucosum_ATCC700975","Cbelfantii_FRC0043","Ccallunae_DSM20147","Ccamporealensis_DSM44610","Cdeserti_GIMN1010","Cdiphtheriae_NCTC11397","Cdoosanense_DSM45436","Cefficiens_YS314","Cepidermidicanis_DSM45586","Cfalsenii_DSM44353","Cglutamicum_ATCC13032","Cglycinophilum_AJ3170","Chalotolerans_YIM70093","Chumireducens_DSM45392","Cimitans_DSM44264","Cjeikeium_K41","Ckroppen…	0.186392	0.186392	1.64759	0.186392	0.186392	1.6476	3330	0
ERS451417_01460	1717.62.peg.1470	NA	NA	NA	1	29	Caurimucosum_ATCC700975,"Cbelfantii_FRC0043","Ccallunae_DSM20147","Ccamporealensis_DSM44610","Cdeserti_GIMN1010","Cdiphtheriae_NCTC11397","Cdoosanense_DSM45436","Cefficiens_YS314","Cepidermidicanis_DSM45586","Cfalsenii_DSM44353","Chalotolerans_YIM70093","Chumireducens_DSM45392","Cimitans_DSM44264","Ckroppenstedtii_DSM44385","Ckutscheri_DSM20755","Clactis_RW25","Cmarinum_DSM44953","Cmaris_DSM45190…	0.223325	0.223325	1.49746	0.223325	0.223325	1.49746	3330	0
ERS451417_00128	1717.62.peg.126	NA	NA	NA	1	39	Cargentoratense_DSM44202,"Catypicum_R2070","Caurimucosum_ATCC700975","Cbelfantii_FRC0043","Ccallunae_DSM20147","Ccamporealensis_DSM44610","Cdeserti_GIMN1010","Cdiphtheriae_NCTC11397","Cdoosanense_DSM45436","Cefficiens_YS314","Cepidermidicanis_DSM45586","Cfalsenii_DSM44353","Cglutamicum_ATCC13032","Cglycinophilum_AJ3170","Chalotolerans_YIM70093","Chumireducens_DSM45392","Cimitans_DSM44264","Cjeike…	0.162895	0.162895	1.78274	0.162895	0.162895	1.78273	258	0
ERS451417_01785	1717.62.peg.1790	NA	NA	NA	1	34	Catypicum_R2070,"Caurimucosum_ATCC700975","Cbelfantii_FRC0043","Ccallunae_DSM20147","Cdeserti_GIMN1010","Cdiphtheriae_NCTC11397","Cdoosanense_DSM45436","Cefficiens_YS314","Cepidermidicanis_DSM45586","Cfalsenii_DSM44353","Cglutamicum_ATCC13032","Cglycinophilum_AJ3170","Chalotolerans_YIM70093","Chumireducens_DSM45392","Cimitans_DSM44264","Cjeikeium_K41","Ckutscheri_DSM20755","Clactis_RW25","Cmarinu…	0.126944	0.126944	1.52337	0.126944	0.126944	1.52337	2050	1	1. 0.70317;2. 238;3. 712;4. 279;5. 279;6. 835;7. 301;8. 901;9. 550;10. S;11. AGC
ERS451417_01965	1717.62.peg.1965	NA	NA	NA	1	10	Cbelfantii_FRC0043,"Cdiphtheriae_NCTC11397","Ckutscheri_DSM20755","Cmustelae_DSM45274","Cpseudotuberculosis_31","Cpseudotuberculosis_ATCC19410","Csilvaticum_KL0182","Culcerans_NCTC12077","Culcerans_NCTC7910","Cvitaeruminis_DSM20294"	0.072002	0.072002	2.30749	0.072002	0.072002	2.30749	258	0
ERS451417_00172	1717.62.peg.170	NA	NA	NA	1	17	Caurimucosum_ATCC700975,"Cbelfantii_FRC0043","Ccallunae_DSM20147","Cdeserti_GIMN1010","Cdiphtheriae_NCTC11397","Cefficiens_YS314","Cfalsenii_DSM44353","Cglutamicum_ATCC13032","Chalotolerans_YIM70093","Ckutscheri_DSM20755","Cmaris_DSM45190","Cpseudotuberculosis_31","Cpseudotuberculosis_ATCC19410","Csilvaticum_KL0182","Csimulans_PES1","Culcerans_NCTC12077","Culcerans_NCTC7910"	0.124034	0.124034	2.37412	0.124034	0.124034	2.37412	258	0
ERS451417_01489	1717.62.peg.1497	NA	NA	NA	1	38	Cargentoratense_DSM44202,"Catypicum_R2070","Caurimucosum_ATCC700975","Cbelfantii_FRC0043","Ccallunae_DSM20147","Ccamporealensis_DSM44610","Cdeserti_GIMN1010","Cdiphtheriae_NCTC11397","Cdoosanense_DSM45436","Cefficiens_YS314","Cepidermidicanis_DSM45586","Cfalsenii_DSM44353","Cglutamicum_ATCC13032","Cglycinophilum_AJ3170","Chalotolerans_YIM70093","Chumireducens_DSM45392","Cimitans_DSM44264","Cjeike…	0.224119	0.224119	1.69925	0.224119	0.224119	1.69926	258	0
ERS451417_00253	1717.62.peg.248	NA	NA	NA	1	9	Cargentoratense_DSM44202,"Cbelfantii_FRC0043","Cdiphtheriae_NCTC11397","Ckroppenstedtii_DSM44385","Cmustelae_DSM45274","Crouxii_FRC0190","Csilvaticum_KL0182","Culcerans_NCTC12077","Culcerans_NCTC7910"	0.087225	0.087225	2.06636	0.087225	0.087225	2.06636	2	2	1. 0.54427;2. 373;3. 1117;4. 429;5. 408;6. 1222;7. 439;8. 1315;9. 874;10. A;11. GCC	1. 0.40287;2. 467;3. 1399;4. 523;5. 502;6. 1504;7. 533;8. 1597;9. 1156;10. V;11. GTG
ERS451417_01970	1717.62.peg.1970	NA	NA	NA	1	7	Cbelfantii_FRC0043,"Cdiphtheriae_NCTC11397","Cpseudotuberculosis_31","Cpseudotuberculosis_ATCC19410","Csilvaticum_KL0182","Culcerans_NCTC12077","Culcerans_NCTC7910"	0.354271	0.354271	3.8385	0.354271	0.354271	3.83851	2	1	1. 0.43395;2. 146;3. 436;4. 178;5. 148;6. 442;7. 148;8. 442;9. 433;10. V;11. GTG
ERS451417_01417	1717.62.peg.1423	NA	NA	NA	1	38	Cargentoratense_DSM44202,"Catypicum_R2070","Caurimucosum_ATCC700975","Cbelfantii_FRC0043","Ccallunae_DSM20147","Ccamporealensis_DSM44610","Cdeserti_GIMN1010","Cdiphtheriae_NCTC11397","Cdoosanense_DSM45436","Cefficiens_YS314","Cepidermidicanis_DSM45586","Cfalsenii_DSM44353","Cglutamicum_ATCC13032","Cglycinophilum_AJ3170","Chalotolerans_YIM70093","Chumireducens_DSM45392","Cimitans_DSM44264","Cjeike…	0.15288	0.15288	1.55687	0.15288	0.15288	1.55687	1282	0
ERS451417_00636	1717.62.peg.640	NA	NA	NA	1	38	Cargentoratense_DSM44202,"Catypicum_R2070","Caurimucosum_ATCC700975","Cbelfantii_FRC0043","Ccallunae_DSM20147","Ccamporealensis_DSM44610","Cdeserti_GIMN1010","Cdiphtheriae_NCTC11397","Cdoosanense_DSM45436","Cefficiens_YS314","Cepidermidicanis_DSM45586","Cglutamicum_ATCC13032","Cglycinophilum_AJ3170","Chalotolerans_YIM70093","Chumireducens_DSM45392","Cimitans_DSM44264","Cjeikeium_K41","Ckroppenste…	0.0456018	0.0456018	1.59034	0.0456018	0.0456018	1.59033	258	0
ERS451417_00306	1717.62.peg.307	NA	NA	NA	1	36	Cargentoratense_DSM44202,"Catypicum_R2070","Caurimucosum_ATCC700975","Cbelfantii_FRC0043","Ccallunae_DSM20147","Ccamporealensis_DSM44610","Cdeserti_GIMN1010","Cdiphtheriae_NCTC11397","Cdoosanense_DSM45436","Cefficiens_YS314","Cepidermidicanis_DSM45586","Cfalsenii_DSM44353","Cglutamicum_ATCC13032","Cglycinophilum_AJ3170","Chalotolerans_YIM70093","Chumireducens_DSM45392","Cimitans_DSM44264","Cjeike…	0.160273	0.160273	1.3453	0.160273	0.160273	1.3453	2306	0
ERS451417_01843	1717.62.peg.1846	NA	NA	NA	1	25	Cargentoratense_DSM44202,"Caurimucosum_ATCC700975","Cbelfantii_FRC0043","Ccallunae_DSM20147","Ccamporealensis_DSM44610","Cdeserti_GIMN1010","Cdiphtheriae_NCTC11397","Cefficiens_YS314","Cepidermidicanis_DSM45586","Cglutamicum_ATCC13032","Chalotolerans_YIM70093","Chumireducens_DSM45392","Ckutscheri_DSM20755","Clactis_RW25","Cmarinum_DSM44953","Cmaris_DSM45190","Cmustelae_DSM45274","Cpseudotuberculo…	0.113898	0.113898	1.67464	0.113898	0.113898	1.67464	3330	0
ERS451417_02297	1717.62.peg.2326	NA	NA	NA	1	31	Cargentoratense_DSM44202,"Catypicum_R2070","Cbelfantii_FRC0043","Ccallunae_DSM20147","Cdeserti_GIMN1010","Cdiphtheriae_NCTC11397","Cefficiens_YS314","Cepidermidicanis_DSM45586","Cglutamicum_ATCC13032","Cglycinophilum_AJ3170","Chalotolerans_YIM70093","Chumireducens_DSM45392","Cimitans_DSM44264","Ckroppenstedtii_DSM44385","Ckutscheri_DSM20755","Clactis_RW25","Cmarinum_DSM44953","Cmaris_DSM45190","C…	0.149978	0.149978	1.7521	0.149969	0.149969	1.75209	3330	0
ERS451417_00246	1717.62.peg.241	NA	NA	NA	1	13	Cbelfantii_FRC0043,"Cdiphtheriae_NCTC11397","Cimitans_DSM44264","Cmarinum_DSM44953","Cmustelae_DSM45274","Cpseudotuberculosis_31","Cpseudotuberculosis_ATCC19410","CriegeliiPUDD83A45","Crouxii_FRC0190","Culcerans_NCTC12077","Culcerans_NCTC7910","Cureicelerivorans_IMMIBRIV2301","Cuterequi_DSM45634"	0.362343	0.362343	1.92988	0.362343	0.362343	1.92987	4098	1	1. 0.51931;2. 16;3. 46;4. 45;5. 29;6. 85;7. 29;8. 85;9. 40;10. L;11. CTC
ERS451417_01973	1717.62.peg.1973	NA	NA	NA	1	38	Cargentoratense_DSM44202,"Catypicum_R2070","Caurimucosum_ATCC700975","Cbelfantii_FRC0043","Ccallunae_DSM20147","Ccamporealensis_DSM44610","Cdeserti_GIMN1010","Cdiphtheriae_NCTC11397","Cdoosanense_DSM45436","Cefficiens_YS314","Cepidermidicanis_DSM45586","Cfalsenii_DSM44353","Cglutamicum_ATCC13032","Cglycinophilum_AJ3170","Chalotolerans_YIM70093","Chumireducens_DSM45392","Cimitans_DSM44264","Cjeike…	0.102316	0.102316	1.92323	0.102316	0.102316	1.92323	258	0
ERS451417_00140	1717.62.peg.139	NA	NA	NA	1	39	Cargentoratense_DSM44202,"Catypicum_R2070","Caurimucosum_ATCC700975","Cbelfantii_FRC0043","Ccallunae_DSM20147","Ccamporealensis_DSM44610","Cdeserti_GIMN1010","Cdiphtheriae_NCTC11397","Cdoosanense_DSM45436","Cefficiens_YS314","Cepidermidicanis_DSM45586","Cfalsenii_DSM44353","Cglutamicum_ATCC13032","Cglycinophilum_AJ3170","Chalotolerans_YIM70093","Chumireducens_DSM45392","Cimitans_DSM44264","Cjeike…	0.0610217	0.0572048	2.21335	0.0568239	0.0568239	2.22647	1282	0
ERS451417_00483	1717.62.peg.486	NA	NA	NA	1	39	Cargentoratense_DSM44202,"Catypicum_R2070","Caurimucosum_ATCC700975","Cbelfantii_FRC0043","Ccallunae_DSM20147","Ccamporealensis_DSM44610","Cdeserti_GIMN1010","Cdiphtheriae_NCTC11397","Cdoosanense_DSM45436","Cefficiens_YS314","Cepidermidicanis_DSM45586","Cfalsenii_DSM44353","Cglutamicum_ATCC13032","Cglycinophilum_AJ3170","Chalotolerans_YIM70093","Chumireducens_DSM45392","Cimitans_DSM44264","Cjeike…	0.094854	0.094854	1.99015	0.094854	0.094854	1.99015	258	0
ERS451417_01676	1717.62.peg.1683	NA	NA	NA	1	33	Catypicum_R2070,"Caurimucosum_ATCC700975","Cbelfantii_FRC0043","Ccallunae_DSM20147","Ccamporealensis_DSM44610","Cdeserti_GIMN1010","Cdiphtheriae_NCTC11397","Cdoosanense_DSM45436","Cefficiens_YS314","Cglutamicum_ATCC13032","Chalotolerans_YIM70093","Chumireducens_DSM45392","Cimitans_DSM44264","Ckroppenstedtii_DSM44385","Ckutscheri_DSM20755","Clactis_RW25","Cmarinum_DSM44953","Cmaris_DSM45190","Cmus…	0.196748	0.196748	1.64504	0.196748	0.196748	1.64504	1026	1	1. 0.50869;2. 90;3. 268;4. 133;5. 132;6. 394;7. 165;8. 493;9. 181;10. S;11. TCC
ERS451417_00962	1717.62.peg.969	NA	NA	NA	1	39	Cargentoratense_DSM44202,"Catypicum_R2070","Caurimucosum_ATCC700975","Cbelfantii_FRC0043","Ccallunae_DSM20147","Ccamporealensis_DSM44610","Cdeserti_GIMN1010","Cdiphtheriae_NCTC11397","Cdoosanense_DSM45436","Cefficiens_YS314","Cepidermidicanis_DSM45586","Cfalsenii_DSM44353","Cglutamicum_ATCC13032","Cglycinophilum_AJ3170","Chalotolerans_YIM70093","Chumireducens_DSM45392","Cimitans_DSM44264","Cjeike…	0.0783787	0.0783787	2.05642	0.0783787	0.0783787	2.05642	258	0
ERS451417_01463	1717.62.peg.1473	NA	NA	NA	1	30	Cargentoratense_DSM44202,"Catypicum_R2070","Caurimucosum_ATCC700975","Cbelfantii_FRC0043","Ccallunae_DSM20147","Ccamporealensis_DSM44610","Cdeserti_GIMN1010","Cdiphtheriae_NCTC11397","Cdoosanense_DSM45436","Cefficiens_YS314","Cepidermidicanis_DSM45586","Cglutamicum_ATCC13032","Chalotolerans_YIM70093","Chumireducens_DSM45392","Cimitans_DSM44264","Ckutscheri_DSM20755","Cmarinum_DSM44953","Cmaris_DS…	0.05828	0.05828	1.25301	0.05828	0.05828	1.25301	3330	0
ERS451417_01043	1717.62.peg.1053	NA	NA	NA	1	39	Cargentoratense_DSM44202,"Catypicum_R2070","Caurimucosum_ATCC700975","Cbelfantii_FRC0043","Ccallunae_DSM20147","Ccamporealensis_DSM44610","Cdeserti_GIMN1010","Cdiphtheriae_NCTC11397","Cdoosanense_DSM45436","Cefficiens_YS314","Cepidermidicanis_DSM45586","Cfalsenii_DSM44353","Cglutamicum_ATCC13032","Cglycinophilum_AJ3170","Chalotolerans_YIM70093","Chumireducens_DSM45392","Cimitans_DSM44264","Cjeike…	0.147755	0.147755	1.47934	0.147755	0.147755	1.47934	258	0
ERS451417_00789	1717.62.peg.796	NA	NA	NA	1	20	Catypicum_R2070,"Cbelfantii_FRC0043","Ccallunae_DSM20147","Cdeserti_GIMN1010","Cdiphtheriae_NCTC11397","Cdoosanense_DSM45436","Cefficiens_YS314","Cglutamicum_ATCC13032","Chalotolerans_YIM70093","Chumireducens_DSM45392","Ckutscheri_DSM20755","Cmarinum_DSM44953","Cmaris_DSM45190","Cmustelae_DSM45274","Crouxii_FRC0190","Csilvaticum_KL0182","Ctestudinoris_DSM44614","Culcerans_NCTC12077","Culcerans_NC…	0.326365	0.326365	1.50193	0.326365	0.326365	1.50193	2306	0
ERS451417_02357	1717.62.peg.2386	NA	NA	NA	1	12	Catypicum_R2070,"Cbelfantii_FRC0043","Cdiphtheriae_NCTC11397","Cfalsenii_DSM44353","Cimitans_DSM44264","Cpseudotuberculosis_31","Csimulans_PES1","Cterpenotabidum_Y11","Ctestudinoris_DSM44614","Culcerans_NCTC12077","Culcerans_NCTC7910","Cureicelerivorans_IMMIBRIV2301"	0.0775112	0.0775112	1.53833	0.0775112	0.0775112	1.53833	4098	3	1. 0.46139;2. 88;3. 262;4. 95;5. 95;6. 283;7. 94;8. 280;9. 256;10. V;11. GTC	1. 0.47443;2. 342;3. 1024;4. 361;5. 360;6. 1078;7. 375;8. 1123;9. 823;10. A;11. GCC	1. 0.44362;2. 405;3. 1213;4. 425;5. 423;6. 1267;7. 438;8. 1312;9. 1012;10. I;11. ATC
ERS451417_01493	1717.62.peg.1501	NA	NA	NA	1	38	Cargentoratense_DSM44202,"Catypicum_R2070","Caurimucosum_ATCC700975","Cbelfantii_FRC0043","Ccallunae_DSM20147","Ccamporealensis_DSM44610","Cdeserti_GIMN1010","Cdiphtheriae_NCTC11397","Cdoosanense_DSM45436","Cefficiens_YS314","Cepidermidicanis_DSM45586","Cfalsenii_DSM44353","Cglutamicum_ATCC13032","Cglycinophilum_AJ3170","Chalotolerans_YIM70093","Chumireducens_DSM45392","Cimitans_DSM44264","Cjeike…	0.604491	0.195074	2.23898	0.195066	0.195066	2.23871	258	0
ERS451417_00883	1717.62.peg.889	NA	NA	NA	1	38	Cargentoratense_DSM44202,"Catypicum_R2070","Caurimucosum_ATCC700975","Cbelfantii_FRC0043","Ccallunae_DSM20147","Ccamporealensis_DSM44610","Cdeserti_GIMN1010","Cdiphtheriae_NCTC11397","Cdoosanense_DSM45436","Cefficiens_YS314","Cepidermidicanis_DSM45586","Cfalsenii_DSM44353","Cglutamicum_ATCC13032","Cglycinophilum_AJ3170","Chalotolerans_YIM70093","Chumireducens_DSM45392","Cimitans_DSM44264","Cjeike…	0.163223	0.163223	1.67793	0.163223	0.163223	1.67794	3330	0
ERS451417_00396	1717.62.peg.396	NA	NA	NA	1	39	Cargentoratense_DSM44202,"Catypicum_R2070","Caurimucosum_ATCC700975","Cbelfantii_FRC0043","Ccallunae_DSM20147","Ccamporealensis_DSM44610","Cdeserti_GIMN1010","Cdiphtheriae_NCTC11397","Cdoosanense_DSM45436","Cefficiens_YS314","Cepidermidicanis_DSM45586","Cfalsenii_DSM44353","Cglutamicum_ATCC13032","Cglycinophilum_AJ3170","Chalotolerans_YIM70093","Chumireducens_DSM45392","Cimitans_DSM44264","Cjeike…	0.175528	0.175528	1.80801	0.175528	0.175528	1.80801	258	0
ERS451417_02224	1717.62.peg.2249	NA	NA	NA	1	36	Cargentoratense_DSM44202,"Catypicum_R2070","Caurimucosum_ATCC700975","Cbelfantii_FRC0043","Ccallunae_DSM20147","Ccamporealensis_DSM44610","Cdeserti_GIMN1010","Cdiphtheriae_NCTC11397","Cdoosanense_DSM45436","Cefficiens_YS314","Cepidermidicanis_DSM45586","Cfalsenii_DSM44353","Cglutamicum_ATCC13032","Cglycinophilum_AJ3170","Chalotolerans_YIM70093","Chumireducens_DSM45392","Cimitans_DSM44264","Cjeike…	0.234081	0.234081	1.59561	0.234081	0.234081	1.59561	2	1	1. 0.55863;2. 336;3. 1006;4. 379;5. 379;6. 1135;7. 431;8. 1291;9. 856;10. E;11. GAG
ERS451417_01331	1717.62.peg.1339	NA	NA	NA	1	38	Cargentoratense_DSM44202,"Catypicum_R2070","Caurimucosum_ATCC700975","Cbelfantii_FRC0043","Ccallunae_DSM20147","Ccamporealensis_DSM44610","Cdeserti_GIMN1010","Cdiphtheriae_NCTC11397","Cdoosanense_DSM45436","Cefficiens_YS314","Cepidermidicanis_DSM45586","Cfalsenii_DSM44353","Cglutamicum_ATCC13032","Cglycinophilum_AJ3170","Chalotolerans_YIM70093","Chumireducens_DSM45392","Cimitans_DSM44264","Cjeike…	0.121421	0.121421	1.77184	0.121421	0.121421	1.77184	2	2	1. 0.53557;2. 142;3. 424;4. 142;5. 142;6. 424;7. 142;8. 424;9. 415;10. A;11. GCG	1. 0.54207;2. 194;3. 580;4. 194;5. 194;6. 580;7. 194;8. 580;9. 571;10. E;11. GAA
ERS451417_00768	1717.62.peg.773	NA	NA	NA	1	39	Cargentoratense_DSM44202,"Catypicum_R2070","Caurimucosum_ATCC700975","Cbelfantii_FRC0043","Ccallunae_DSM20147","Ccamporealensis_DSM44610","Cdeserti_GIMN1010","Cdiphtheriae_NCTC11397","Cdoosanense_DSM45436","Cefficiens_YS314","Cepidermidicanis_DSM45586","Cfalsenii_DSM44353","Cglutamicum_ATCC13032","Cglycinophilum_AJ3170","Chalotolerans_YIM70093","Chumireducens_DSM45392","Cimitans_DSM44264","Cjeike…	0.0685201	0.0685201	2.05437	0.0685201	0.0685201	2.05437	1282	0
ERS451417_02396	1717.62.peg.2428	NA	NA	NA	1	38	Cargentoratense_DSM44202,"Catypicum_R2070","Caurimucosum_ATCC700975","Cbelfantii_FRC0043","Ccallunae_DSM20147","Ccamporealensis_DSM44610","Cdeserti_GIMN1010","Cdiphtheriae_NCTC11397","Cdoosanense_DSM45436","Cefficiens_YS314","Cepidermidicanis_DSM45586","Cfalsenii_DSM44353","Cglutamicum_ATCC13032","Cglycinophilum_AJ3170","Chalotolerans_YIM70093","Chumireducens_DSM45392","Cimitans_DSM44264","Cjeike…	0.181101	0.181101	1.81568	0.181101	0.181101	1.81569	1282	0
ERS451417_01782	1717.62.peg.1787	NA	NA	NA	1	38	Cargentoratense_DSM44202,"Catypicum_R2070","Caurimucosum_ATCC700975","Cbelfantii_FRC0043","Ccallunae_DSM20147","Ccamporealensis_DSM44610","Cdeserti_GIMN1010","Cdiphtheriae_NCTC11397","Cdoosanense_DSM45436","Cefficiens_YS314","Cepidermidicanis_DSM45586","Cfalsenii_DSM44353","Cglutamicum_ATCC13032","Cglycinophilum_AJ3170","Chalotolerans_YIM70093","Chumireducens_DSM45392","Cimitans_DSM44264","Cjeike…	0.564475	0.231992	1.39496	0.36533	0.231991	1.39496	258	0
ERS451417_02353	1717.62.peg.2381	NA	NA	NA	1	12	Cbelfantii_FRC0043,"Ccamporealensis_DSM44610","Cdiphtheriae_NCTC11397","Chalotolerans_YIM70093","Chumireducens_DSM45392","Cmarinum_DSM44953","Cpseudotuberculosis_31","Cpseudotuberculosis_ATCC19410","Csilvaticum_KL0182","Culcerans_NCTC12077","Culcerans_NCTC7910","Cvitaeruminis_DSM20294"	0.275614	0.235611	2.52468	0.275614	0.235611	2.52468	3074	4	1. 0.55943;2. 94;3. 280;4. 134;5. 110;6. 328;7. 180;8. 538;9. 22;10. L;11. CTC	1. 0.56452;2. 138;3. 412;4. 192;5. 154;6. 460;7. 224;8. 670;9. 154;10. A;11. GCA	1. 0.40091;2. 300;3. 898;4. 417;5. 317;6. 949;7. 388;8. 1162;9. 607;10. L;11. TTG	1. 0.61665;2. 302;3. 904;4. 419;5. 319;6. 955;7. 390;8. 1168;9. 613;10. V;11. GTT
ERS451417_01340	1717.62.peg.1348	NA	NA	NA	1	38	Cargentoratense_DSM44202,"Catypicum_R2070","Caurimucosum_ATCC700975","Cbelfantii_FRC0043","Ccallunae_DSM20147","Ccamporealensis_DSM44610","Cdeserti_GIMN1010","Cdiphtheriae_NCTC11397","Cdoosanense_DSM45436","Cefficiens_YS314","Cepidermidicanis_DSM45586","Cfalsenii_DSM44353","Cglutamicum_ATCC13032","Cglycinophilum_AJ3170","Chalotolerans_YIM70093","Chumireducens_DSM45392","Cimitans_DSM44264","Cjeike…	0.0941656	0.0941656	1.74799	0.0941656	0.0941656	1.74799	258	0
ERS451417_00969	1717.62.peg.977	NA	NA	NA	1	13	Caurimucosum_ATCC700975,"Cbelfantii_FRC0043","Cdiphtheriae_NCTC11397","Cepidermidicanis_DSM45586","Ckutscheri_DSM20755","Clactis_RW25","Cpseudotuberculosis_31","Cpseudotuberculosis_ATCC19410","Crouxii_FRC0190","Csilvaticum_KL0182","Ctestudinoris_DSM44614","Culcerans_NCTC12077","Culcerans_NCTC7910"	0.208992	0.208992	2.59384	0.208992	0.208992	2.59384	2050	1	1. 0.5584;2. 142;3. 424;4. 220;5. 176;6. 526;7. 209;8. 625;9. 298;10. I;11. ATC
ERS451417_01643	1717.62.peg.1650	NA	NA	NA	1	38	Cargentoratense_DSM44202,"Catypicum_R2070","Caurimucosum_ATCC700975","Cbelfantii_FRC0043","Ccallunae_DSM20147","Ccamporealensis_DSM44610","Cdeserti_GIMN1010","Cdiphtheriae_NCTC11397","Cdoosanense_DSM45436","Cefficiens_YS314","Cepidermidicanis_DSM45586","Cfalsenii_DSM44353","Cglutamicum_ATCC13032","Cglycinophilum_AJ3170","Chalotolerans_YIM70093","Chumireducens_DSM45392","Cimitans_DSM44264","Cjeike…	0.263018	0.263018	1.5811	0.263018	0.263018	1.5811	1026	3	1. 0.48639;2. 62;3. 184;4. 79;5. 79;6. 235;7. 140;8. 418;9. 130;10. V;11. GTT	1. 0.73495;2. 249;3. 745;4. 273;5. 273;6. 817;7. 385;8. 1153;9. 580;10. I;11. ATC	1. 0.52577;2. 273;3. 817;4. 297;5. 297;6. 889;7. 409;8. 1225;9. 652;10. L;11. TTG
ERS451417_01295	1717.62.peg.1303	NA	NA	NA	1	38	Cargentoratense_DSM44202,"Catypicum_R2070","Caurimucosum_ATCC700975","Cbelfantii_FRC0043","Ccallunae_DSM20147","Ccamporealensis_DSM44610","Cdeserti_GIMN1010","Cdiphtheriae_NCTC11397","Cdoosanense_DSM45436","Cefficiens_YS314","Cepidermidicanis_DSM45586","Cfalsenii_DSM44353","Cglutamicum_ATCC13032","Cglycinophilum_AJ3170","Chalotolerans_YIM70093","Chumireducens_DSM45392","Cimitans_DSM44264","Cjeike…	0.076441	0.076441	1.62466	0.076441	0.076441	1.62466	258	0
ERS451417_01316	1717.62.peg.1324	NA	NA	NA	1	36	Catypicum_R2070,"Caurimucosum_ATCC700975","Cbelfantii_FRC0043","Ccallunae_DSM20147","Ccamporealensis_DSM44610","Cdeserti_GIMN1010","Cdiphtheriae_NCTC11397","Cdoosanense_DSM45436","Cefficiens_YS314","Cepidermidicanis_DSM45586","Cfalsenii_DSM44353","Cglutamicum_ATCC13032","Cglycinophilum_AJ3170","Chalotolerans_YIM70093","Chumireducens_DSM45392","Cimitans_DSM44264","Cjeikeium_K41","Ckroppenstedtii_D…	0.262296	0.215753	1.63803	0.262296	0.215753	1.63803	1026	2	1. 0.71096;2. 121;3. 361;4. 127;5. 127;6. 379;7. 133;8. 397;9. 316;10. E;11. GAA	1. 0.5609;2. 131;3. 391;4. 137;5. 137;6. 409;7. 143;8. 427;9. 346;10. G;11. GGT
ERS451417_01823	1717.62.peg.1828	NA	NA	NA	1	6	Cbelfantii_FRC0043,"Cdiphtheriae_NCTC11397","Cpseudotuberculosis_ATCC19410","Csilvaticum_KL0182","Culcerans_NCTC12077","Culcerans_NCTC7910"	0.30454	0.30454	4.32956	0.304548	0.304548	4.32955	258	0
ERS451417_00677	1717.62.peg.684	NA	NA	NA	1	39	Cargentoratense_DSM44202,"Catypicum_R2070","Caurimucosum_ATCC700975","Cbelfantii_FRC0043","Ccallunae_DSM20147","Ccamporealensis_DSM44610","Cdeserti_GIMN1010","Cdiphtheriae_NCTC11397","Cdoosanense_DSM45436","Cefficiens_YS314","Cepidermidicanis_DSM45586","Cfalsenii_DSM44353","Cglutamicum_ATCC13032","Cglycinophilum_AJ3170","Chalotolerans_YIM70093","Chumireducens_DSM45392","Cimitans_DSM44264","Cjeike…	0.0765887	0.0765887	1.66886	0.0765887	0.0765887	1.66885	258	0
ERS451417_00971	1717.62.peg.979	NA	NA	NA	1	14	Cbelfantii_FRC0043,"Cdeserti_GIMN1010","Cdiphtheriae_NCTC11397","Cepidermidicanis_DSM45586","Cglutamicum_ATCC13032","Ckutscheri_DSM20755","Clactis_RW25","Cpseudotuberculosis_31","Cpseudotuberculosis_ATCC19410","Crouxii_FRC0190","Csilvaticum_KL0182","Ctestudinoris_DSM44614","Culcerans_NCTC12077","Culcerans_NCTC7910"	0.14914	0.14914	2.76726	0.14914	0.14914	2.76726	2	3	1. 0.46675;2. 157;3. 469;4. 180;5. 160;6. 478;7. 231;8. 691;9. 328;10. I;11. ATT	1. 0.61752;2. 168;3. 502;4. 194;5. 171;6. 511;7. 242;8. 724;9. 361;10. P;11. CCG	1. 0.46535;2. 193;3. 577;4. 223;5. 196;6. 586;7. 267;8. 799;9. 436;10. V;11. GTT
ERS451417_00708	1717.62.peg.713	NA	NA	NA	1	39	Cargentoratense_DSM44202,"Catypicum_R2070","Caurimucosum_ATCC700975","Cbelfantii_FRC0043","Ccallunae_DSM20147","Ccamporealensis_DSM44610","Cdeserti_GIMN1010","Cdiphtheriae_NCTC11397","Cdoosanense_DSM45436","Cefficiens_YS314","Cepidermidicanis_DSM45586","Cfalsenii_DSM44353","Cglutamicum_ATCC13032","Cglycinophilum_AJ3170","Chalotolerans_YIM70093","Chumireducens_DSM45392","Cimitans_DSM44264","Cjeike…	0.16098	0.16098	1.88953	0.16098	0.16098	1.88953	2	2	1. 0.62784;2. 281;3. 841;4. 340;5. 340;6. 1018;7. 474;8. 1420;9. 658;10. I;11. ATC	1. 0.44369;2. 292;3. 874;4. 351;5. 351;6. 1051;7. 485;8. 1453;9. 691;10. R;11. CGC
ERS451417_01865	1717.62.peg.1867	NA	NA	NA	1	38	Cargentoratense_DSM44202,"Catypicum_R2070","Caurimucosum_ATCC700975","Cbelfantii_FRC0043","Ccallunae_DSM20147","Ccamporealensis_DSM44610","Cdeserti_GIMN1010","Cdiphtheriae_NCTC11397","Cdoosanense_DSM45436","Cefficiens_YS314","Cepidermidicanis_DSM45586","Cfalsenii_DSM44353","Cglutamicum_ATCC13032","Cglycinophilum_AJ3170","Chalotolerans_YIM70093","Chumireducens_DSM45392","Cimitans_DSM44264","Cjeike…	0.0653431	0.0653431	1.40241	0.0653431	0.0653431	1.4024	1282	0
ERS451417_01630	1717.62.peg.1637	NA	NA	NA	1	37	Cargentoratense_DSM44202,"Catypicum_R2070","Caurimucosum_ATCC700975","Cbelfantii_FRC0043","Ccallunae_DSM20147","Ccamporealensis_DSM44610","Cdeserti_GIMN1010","Cdiphtheriae_NCTC11397","Cdoosanense_DSM45436","Cefficiens_YS314","Cepidermidicanis_DSM45586","Cfalsenii_DSM44353","Cglutamicum_ATCC13032","Cglycinophilum_AJ3170","Chalotolerans_YIM70093","Cimitans_DSM44264","Cjeikeium_K41","Ckroppenstedtii…	0.0523978	0.0523978	1.72669	0.0523978	0.0523978	1.72669	258	0
ERS451417_01052	1717.62.peg.1062	NA	NA	NA	1	27	Cargentoratense_DSM44202,"Catypicum_R2070","Cbelfantii_FRC0043","Ccallunae_DSM20147","Cdeserti_GIMN1010","Cdiphtheriae_NCTC11397","Cefficiens_YS314","Cepidermidicanis_DSM45586","Cfalsenii_DSM44353","Cglutamicum_ATCC13032","Cglycinophilum_AJ3170","Chalotolerans_YIM70093","Chumireducens_DSM45392","Cjeikeium_K41","Cmarinum_DSM44953","Cmaris_DSM45190","Cmustelae_DSM45274","Cpseudotuberculosis_31","Cp…	0.34364	0.340771	1.66812	0.340781	0.340771	1.66812	258	0
ERS451417_01504	1717.62.peg.1512	NA	NA	NA	1	38	Cargentoratense_DSM44202,"Catypicum_R2070","Caurimucosum_ATCC700975","Cbelfantii_FRC0043","Ccallunae_DSM20147","Ccamporealensis_DSM44610","Cdeserti_GIMN1010","Cdiphtheriae_NCTC11397","Cdoosanense_DSM45436","Cefficiens_YS314","Cepidermidicanis_DSM45586","Cfalsenii_DSM44353","Cglutamicum_ATCC13032","Cglycinophilum_AJ3170","Chalotolerans_YIM70093","Chumireducens_DSM45392","Cimitans_DSM44264","Cjeike…	0.170212	0.170212	1.75972	0.170212	0.170212	1.75972	258	0
ERS451417_02258	1717.62.peg.2287	NA	NA	NA	1	14	Caurimucosum_ATCC700975,"Cbelfantii_FRC0043","Ccamporealensis_DSM44610","Cdiphtheriae_NCTC11397","Ckroppenstedtii_DSM44385","Clactis_RW25","Cpseudotuberculosis_31","Cpseudotuberculosis_ATCC19410","Csilvaticum_KL0182","Csimulans_PES1","Csingulare_IBSB52218","Culcerans_NCTC12077","Culcerans_NCTC7910","Cuterequi_DSM45634"	0.127216	0.127216	1.94462	0.127216	0.127216	1.94462	2	1	1. 0.68396;2. 181;3. 541;4. 202;5. 193;6. 577;7. 200;8. 598;9. 430;10. V;11. GTT
ERS451417_02000	1717.62.peg.2004	NA	NA	NA	1	7	Cbelfantii_FRC0043,"Cdiphtheriae_NCTC11397","Cpseudotuberculosis_31","Cpseudotuberculosis_ATCC19410","Csilvaticum_KL0182","Culcerans_NCTC12077","Culcerans_NCTC7910"	0.193977	0.193977	3.76689	0.193967	0.193967	3.76689	2	1	1. 0.50864;2. 125;3. 373;4. 125;5. 125;6. 373;7. 125;8. 373;9. 373;10. Q;11. CAG
ERS451417_01802	1717.62.peg.1808	NA	NA	NA	1	38	Cargentoratense_DSM44202,"Catypicum_R2070","Caurimucosum_ATCC700975","Cbelfantii_FRC0043","Ccallunae_DSM20147","Ccamporealensis_DSM44610","Cdeserti_GIMN1010","Cdiphtheriae_NCTC11397","Cdoosanense_DSM45436","Cefficiens_YS314","Cepidermidicanis_DSM45586","Cfalsenii_DSM44353","Cglutamicum_ATCC13032","Cglycinophilum_AJ3170","Chalotolerans_YIM70093","Chumireducens_DSM45392","Cimitans_DSM44264","Cjeike…	0.135252	0.135252	1.807	0.135252	0.135252	1.80699	2	1	1. 0.58792;2. 660;3. 1978;4. 720;5. 720;6. 2158;7. 854;8. 2560;9. 1738;10. A;11. GCA
ERS451417_01962	1717.62.peg.1962	NA	NA	NA	1	16	Catypicum_R2070,"Caurimucosum_ATCC700975","Cbelfantii_FRC0043","Ccallunae_DSM20147","Cdeserti_GIMN1010","Cdiphtheriae_NCTC11397","Cefficiens_YS314","Cglutamicum_ATCC13032","Cglycinophilum_AJ3170","Ckutscheri_DSM20755","Cpseudotuberculosis_31","Cpseudotuberculosis_ATCC19410","Csingulare_IBSB52218","Culcerans_NCTC12077","Culcerans_NCTC7910","Cvitaeruminis_DSM20294"	6.69224	0.123008	2.54824	0.124171	0.124171	2.54927	6400	0
ERS451417_00873	1717.62.peg.879	NA	NA	NA	1	8	Cbelfantii_FRC0043,"Cdiphtheriae_NCTC11397","Cpseudotuberculosis_31","Cpseudotuberculosis_ATCC19410","Crouxii_FRC0190","Csilvaticum_KL0182","Culcerans_NCTC12077","Culcerans_NCTC7910"	0.0963069	0.0963069	2.55894	0.0963069	0.0963069	2.55894	2	6	1. 0.46791;2. 75;3. 223;4. 144;5. 111;6. 331;7. 113;8. 337;9. 154;10. P;11. CCC	1. 0.49082;2. 77;3. 229;4. 146;5. 113;6. 337;7. 115;8. 343;9. 160;10. P;11. CCT	1. 0.52689;2. 122;3. 364;4. 213;5. 158;6. 472;7. 160;8. 478;9. 295;10. G;11. GGT	1. 0.55283;2. 146;3. 436;4. 238;5. 182;6. 544;7. 184;8. 550;9. 367;10. A;11. GCT	1. 0.4954;2. 321;3. 961;4. 454;5. 357;6. 1069;7. 359;8. 1075;9. 892;10. M;11. ATG	1. 0.46804;2. 421;3. 1261;4. 658;5. 457;6. 1369;7. 459;8. 1375;9. 1192;10. A;11. GCC
ERS451417_02152	1717.62.peg.2175	NA	NA	NA	1	16	Caurimucosum_ATCC700975,"Cbelfantii_FRC0043","Ccamporealensis_DSM44610","Cdiphtheriae_NCTC11397","Cfalsenii_DSM44353","Cjeikeium_K41","Ckutscheri_DSM20755","Clactis_RW25","Cmustelae_DSM45274","Cpseudotuberculosis_31","Cpseudotuberculosis_ATCC19410","Csilvaticum_KL0182","Csingulare_IBSB52218","Culcerans_NCTC12077","Culcerans_NCTC7910","Curealyticum_DSM7109"	0.134049	0.134049	2.23823	0.134049	0.134049	2.23823	258	0
ERS451417_01201	1717.62.peg.1209	NA	NA	NA	1	26	Caurimucosum_ATCC700975,"Cbelfantii_FRC0043","Ccallunae_DSM20147","Ccamporealensis_DSM44610","Cdeserti_GIMN1010","Cdiphtheriae_NCTC11397","Cefficiens_YS314","Cepidermidicanis_DSM45586","Cglutamicum_ATCC13032","Chalotolerans_YIM70093","Chumireducens_DSM45392","Cimitans_DSM44264","Cmarinum_DSM44953","Cmaris_DSM45190","Cmustelae_DSM45274","Cpseudotuberculosis_31","Cpseudotuberculosis_ATCC19410","Cri…	0.13699	0.13699	1.70632	0.13699	0.13699	1.70632	7170	1	1. 0.54746;2. 316;3. 946;4. 370;5. 340;6. 1018;7. 385;8. 1153;9. 796;10. A;11. GCT
ERS451417_02133	1717.62.peg.2153	NA	NA	NA	1	27	Catypicum_R2070,"Caurimucosum_ATCC700975","Cbelfantii_FRC0043","Ccamporealensis_DSM44610","Cdeserti_GIMN1010","Cdiphtheriae_NCTC11397","Cdoosanense_DSM45436","Cfalsenii_DSM44353","Cglutamicum_ATCC13032","Cglycinophilum_AJ3170","Chalotolerans_YIM70093","Chumireducens_DSM45392","Cimitans_DSM44264","Cjeikeium_K41","Clactis_RW25","Cmarinum_DSM44953","Cmaris_DSM45190","Cpseudotuberculosis_31","Cpseudo…	0.18856	0.18856	1.75973	0.18856	0.18856	1.75973	258	0
ERS451417_00733	1717.62.peg.736	NA	NA	NA	1	39	Cargentoratense_DSM44202,"Catypicum_R2070","Caurimucosum_ATCC700975","Cbelfantii_FRC0043","Ccallunae_DSM20147","Ccamporealensis_DSM44610","Cdeserti_GIMN1010","Cdiphtheriae_NCTC11397","Cdoosanense_DSM45436","Cefficiens_YS314","Cepidermidicanis_DSM45586","Cfalsenii_DSM44353","Cglutamicum_ATCC13032","Cglycinophilum_AJ3170","Chalotolerans_YIM70093","Chumireducens_DSM45392","Cimitans_DSM44264","Cjeike…	1	0.137875	1.81321	0.138076	0.138076	1.8105	256	0
ERS451417_02371	1717.62.peg.2401	NA	NA	NA	1	33	Cargentoratense_DSM44202,"Catypicum_R2070","Caurimucosum_ATCC700975","Cbelfantii_FRC0043","Ccallunae_DSM20147","Ccamporealensis_DSM44610","Cdeserti_GIMN1010","Cdiphtheriae_NCTC11397","Cdoosanense_DSM45436","Cefficiens_YS314","Cepidermidicanis_DSM45586","Cglutamicum_ATCC13032","Chalotolerans_YIM70093","Chumireducens_DSM45392","Cimitans_DSM44264","Ckutscheri_DSM20755","Clactis_RW25","Cmarinum_DSM44…	0.147022	0.147022	1.7262	0.147022	0.147022	1.7262	258	0
ERS451417_00717	1717.62.peg.722	NA	NA	NA	1	12	Cargentoratense_DSM44202,"Cbelfantii_FRC0043","Cdiphtheriae_NCTC11397","Cepidermidicanis_DSM45586","Ckutscheri_DSM20755","Cmustelae_DSM45274","Cpseudotuberculosis_31","Crouxii_FRC0190","Csilvaticum_KL0182","Culcerans_NCTC12077","Culcerans_NCTC7910","Cvitaeruminis_DSM20294"	0.211603	0.211603	2.35349	0.211603	0.211603	2.35349	2050	1	1. 0.50933;2. 199;3. 595;4. 251;5. 227;6. 679;7. 275;8. 823;9. 493;10. I;11. ATT
ERS451417_02361	1717.62.peg.2390	NA	NA	NA	1	12	Caurimucosum_ATCC700975,"Cbelfantii_FRC0043","Cdiphtheriae_NCTC11397","Ckroppenstedtii_DSM44385","Cpseudotuberculosis_31","Cpseudotuberculosis_ATCC19410","Csilvaticum_KL0182","Csimulans_PES1","Csingulare_IBSB52218","Culcerans_NCTC12077","Culcerans_NCTC7910","Cuterequi_DSM45634"	0.196167	0.196167	2.72674	0.196167	0.196167	2.72674	258	0
ERS451417_01184	1717.62.peg.1193	NA	NA	NA	1	39	Cargentoratense_DSM44202,"Catypicum_R2070","Caurimucosum_ATCC700975","Cbelfantii_FRC0043","Ccallunae_DSM20147","Ccamporealensis_DSM44610","Cdeserti_GIMN1010","Cdiphtheriae_NCTC11397","Cdoosanense_DSM45436","Cefficiens_YS314","Cepidermidicanis_DSM45586","Cfalsenii_DSM44353","Cglutamicum_ATCC13032","Cglycinophilum_AJ3170","Chalotolerans_YIM70093","Chumireducens_DSM45392","Cimitans_DSM44264","Cjeike…	0.0981577	0.0981577	1.50781	0.0981577	0.0981577	1.50781	258	0
ERS451417_01492	1717.62.peg.1500	NA	NA	NA	1	38	Cargentoratense_DSM44202,"Catypicum_R2070","Caurimucosum_ATCC700975","Cbelfantii_FRC0043","Ccallunae_DSM20147","Ccamporealensis_DSM44610","Cdeserti_GIMN1010","Cdiphtheriae_NCTC11397","Cdoosanense_DSM45436","Cefficiens_YS314","Cepidermidicanis_DSM45586","Cfalsenii_DSM44353","Cglutamicum_ATCC13032","Cglycinophilum_AJ3170","Chalotolerans_YIM70093","Chumireducens_DSM45392","Cimitans_DSM44264","Cjeike…	0.140892	0.140892	1.81298	0.140892	0.140892	1.81301	2	1	1. 0.54722;2. 605;3. 1813;4. 740;5. 740;6. 2218;7. 872;8. 2614;9. 1654;10. E;11. GAG
ERS451417_00447	1717.62.peg.450	NA	NA	NA	1	17	Cbelfantii_FRC0043,"Ccallunae_DSM20147","Ccamporealensis_DSM44610","Cdeserti_GIMN1010","Cdiphtheriae_NCTC11397","Cepidermidicanis_DSM45586","Cglutamicum_ATCC13032","Ckutscheri_DSM20755","Cmustelae_DSM45274","Cpseudotuberculosis_31","Cpseudotuberculosis_ATCC19410","Crouxii_FRC0190","Csilvaticum_KL0182","Ctestudinoris_DSM44614","Culcerans_NCTC12077","Culcerans_NCTC7910","Cuterequi_DSM45634"	0.104135	0.104135	2.18487	0.104135	0.104135	2.18488	258	0
ERS451417_01205	1717.62.peg.1213	NA	NA	NA	1	8	Cbelfantii_FRC0043,"Cdiphtheriae_NCTC11397","Cpseudotuberculosis_31","Cpseudotuberculosis_ATCC19410","Crouxii_FRC0190","Culcerans_NCTC12077","Culcerans_NCTC7910","Cvitaeruminis_DSM20294"	0.111911	0.111911	2.50382	0.111911	0.111911	2.50382	4098	1	1. 0.55167;2. 151;3. 451;4. 157;5. 153;6. 457;7. 154;8. 460;9. 400;10. E;11. GAA
ERS451417_00099	1717.62.peg.97	NA	NA	NA	1	28	Cargentoratense_DSM44202,"Caurimucosum_ATCC700975","Cbelfantii_FRC0043","Ccallunae_DSM20147","Ccamporealensis_DSM44610","Cdeserti_GIMN1010","Cdiphtheriae_NCTC11397","Cdoosanense_DSM45436","Cefficiens_YS314","Cepidermidicanis_DSM45586","Cglutamicum_ATCC13032","Chalotolerans_YIM70093","Chumireducens_DSM45392","Cimitans_DSM44264","Cmarinum_DSM44953","Cmaris_DSM45190","Cpseudotuberculosis_31","Cpseud…	0.172147	0.172147	1.63296	0.172147	0.172147	1.63296	3074	1	1. 0.41625;2. 41;3. 121;4. 69;5. 59;6. 175;7. 119;8. 355;9. 58;10. V;11. GTA
ERS451417_00772	1717.62.peg.777	NA	NA	NA	1	11	Cbelfantii_FRC0043,"Cdiphtheriae_NCTC11397","Cefficiens_YS314","Cmustelae_DSM45274","Cpseudotuberculosis_31","Cpseudotuberculosis_ATCC19410","Crouxii_FRC0190","Csilvaticum_KL0182","Culcerans_NCTC12077","Culcerans_NCTC7910","Cvitaeruminis_DSM20294"	0.165163	0.165163	2.58455	0.165163	0.165163	2.58455	2	1	1. 0.79732;2. 95;3. 283;4. 119;5. 100;6. 298;7. 102;8. 304;9. 235;10. S;11. AGC
ERS451417_00236	1717.62.peg.232	NA	NA	NA	1	33	Catypicum_R2070,"Caurimucosum_ATCC700975","Cbelfantii_FRC0043","Ccamporealensis_DSM44610","Cdeserti_GIMN1010","Cdiphtheriae_NCTC11397","Cdoosanense_DSM45436","Cefficiens_YS314","Cepidermidicanis_DSM45586","Cglutamicum_ATCC13032","Cglycinophilum_AJ3170","Chalotolerans_YIM70093","Chumireducens_DSM45392","Cimitans_DSM44264","Ckroppenstedtii_DSM44385","Ckutscheri_DSM20755","Cmarinum_DSM44953","Cmaris…	0.233221	0.233221	1.83787	0.233221	0.233221	1.83787	2306	0
ERS451417_00482	1717.62.peg.485	NA	NA	NA	1	39	Cargentoratense_DSM44202,"Catypicum_R2070","Caurimucosum_ATCC700975","Cbelfantii_FRC0043","Ccallunae_DSM20147","Ccamporealensis_DSM44610","Cdeserti_GIMN1010","Cdiphtheriae_NCTC11397","Cdoosanense_DSM45436","Cefficiens_YS314","Cepidermidicanis_DSM45586","Cfalsenii_DSM44353","Cglutamicum_ATCC13032","Cglycinophilum_AJ3170","Chalotolerans_YIM70093","Chumireducens_DSM45392","Cimitans_DSM44264","Cjeike…	0.200867	0.200867	2.12319	0.200867	0.200867	2.12316	2306	0
ERS451417_00068	1717.62.peg.64	NA	NA	NA	1	16	Cbelfantii_FRC0043,"Ccallunae_DSM20147","Cdiphtheriae_NCTC11397","Cdoosanense_DSM45436","Chalotolerans_YIM70093","Chumireducens_DSM45392","Cmarinum_DSM44953","Cmaris_DSM45190","Cpseudotuberculosis_31","Cpseudotuberculosis_ATCC19410","Crouxii_FRC0190","Csilvaticum_KL0182","Ctestudinoris_DSM44614","Culcerans_NCTC12077","Culcerans_NCTC7910","Cvitaeruminis_DSM20294"	0.149034	0.149034	1.63663	0.149034	0.149034	1.63664	258	0
ERS451417_00842	1717.62.peg.847	NA	NA	NA	1	39	Cargentoratense_DSM44202,"Catypicum_R2070","Caurimucosum_ATCC700975","Cbelfantii_FRC0043","Ccallunae_DSM20147","Ccamporealensis_DSM44610","Cdeserti_GIMN1010","Cdiphtheriae_NCTC11397","Cdoosanense_DSM45436","Cefficiens_YS314","Cepidermidicanis_DSM45586","Cfalsenii_DSM44353","Cglutamicum_ATCC13032","Cglycinophilum_AJ3170","Chalotolerans_YIM70093","Chumireducens_DSM45392","Cimitans_DSM44264","Cjeike…	0.105136	0.105136	1.8076	0.105136	0.105136	1.80759	258	0
ERS451417_01575	1717.62.peg.1584	NA	NA	NA	1	38	Cargentoratense_DSM44202,"Catypicum_R2070","Caurimucosum_ATCC700975","Cbelfantii_FRC0043","Ccallunae_DSM20147","Ccamporealensis_DSM44610","Cdeserti_GIMN1010","Cdiphtheriae_NCTC11397","Cdoosanense_DSM45436","Cefficiens_YS314","Cepidermidicanis_DSM45586","Cfalsenii_DSM44353","Cglutamicum_ATCC13032","Cglycinophilum_AJ3170","Chalotolerans_YIM70093","Chumireducens_DSM45392","Cimitans_DSM44264","Cjeike…	0.130402	0.130402	1.83645	0.130402	0.130402	1.83642	2	1	1. 0.41972;2. 317;3. 949;4. 320;5. 320;6. 958;7. 320;8. 958;9. 862;10. I;11. ATC
ERS451417_02285	1717.62.peg.2314	NA	NA	NA	1	7	Cbelfantii_FRC0043,"Cdiphtheriae_NCTC11397","Cpseudotuberculosis_31","Cpseudotuberculosis_ATCC19410","Csilvaticum_KL0182","Culcerans_NCTC12077","Culcerans_NCTC7910"	0.140414	0.140414	3.06452	0.140414	0.140414	3.06452	258	0
ERS451417_00517	1717.62.peg.521	NA	NA	NA	1	9	Cbelfantii_FRC0043,"Cdiphtheriae_NCTC11397","Cjeikeium_K41","Clactis_RW25","Cpseudotuberculosis_31","Cpseudotuberculosis_ATCC19410","Csilvaticum_KL0182","Culcerans_NCTC12077","Culcerans_NCTC7910"	0.13226	0.13226	2.59035	0.13226	0.13226	2.59036	2	3	1. 0.44862;2. 19;3. 55;4. 32;5. 32;6. 94;7. 39;8. 115;9. 4;10. A;11. GCT	1. 0.54971;2. 84;3. 250;4. 97;5. 97;6. 289;7. 104;8. 310;9. 199;10. A;11. GCC	1. 0.50585;2. 226;3. 676;4. 239;5. 239;6. 715;7. 246;8. 736;9. 625;10. R;11. CGG
ERS451417_00627	1717.62.peg.631	NA	NA	NA	1	27	Cargentoratense_DSM44202,"Catypicum_R2070","Cbelfantii_FRC0043","Ccallunae_DSM20147","Cdeserti_GIMN1010","Cdiphtheriae_NCTC11397","Cdoosanense_DSM45436","Cefficiens_YS314","Cfalsenii_DSM44353","Cglutamicum_ATCC13032","Cglycinophilum_AJ3170","Chalotolerans_YIM70093","Cjeikeium_K41","Ckutscheri_DSM20755","Clactis_RW25","Cmaris_DSM45190","Cmustelae_DSM45274","Cpseudotuberculosis_31","Cpseudotubercul…	0.147475	0.147475	1.66684	0.147485	0.147485	1.66693	258	0
ERS451417_02005	1717.62.peg.2009	NA	NA	NA	1	13	Caurimucosum_ATCC700975,"Cbelfantii_FRC0043","Cdiphtheriae_NCTC11397","Cglycinophilum_AJ3170","Cjeikeium_K41","Cpseudotuberculosis_31","Cpseudotuberculosis_ATCC19410","Csilvaticum_KL0182","Csimulans_PES1","Csingulare_IBSB52218","Culcerans_NCTC12077","Culcerans_NCTC7910","Curealyticum_DSM7109"	0.143748	0.143748	1.98858	0.143748	0.143748	1.98858	3330	0
ERS451417_01788	1717.62.peg.1793	NA	NA	NA	1	31	Cargentoratense_DSM44202,"Catypicum_R2070","Caurimucosum_ATCC700975","Cbelfantii_FRC0043","Ccallunae_DSM20147","Ccamporealensis_DSM44610","Cdeserti_GIMN1010","Cdiphtheriae_NCTC11397","Cdoosanense_DSM45436","Cefficiens_YS314","Cepidermidicanis_DSM45586","Cglutamicum_ATCC13032","Chalotolerans_YIM70093","Chumireducens_DSM45392","Cimitans_DSM44264","Ckutscheri_DSM20755","Cmarinum_DSM44953","Cmaris_DS…	0.151324	0.151324	1.74737	0.151324	0.151324	1.74737	1026	1	1. 0.59256;2. 244;3. 730;4. 501;5. 254;6. 760;7. 264;8. 790;9. 652;10. S;11. AGC
ERS451417_00516	1717.62.peg.520	NA	NA	NA	1	10	Cbelfantii_FRC0043,"Cdiphtheriae_NCTC11397","Cjeikeium_K41","Clactis_RW25","Cpseudotuberculosis_31","Cpseudotuberculosis_ATCC19410","Crouxii_FRC0190","Csilvaticum_KL0182","Culcerans_NCTC12077","Culcerans_NCTC7910"	0.0432524	0.0432524	2.39989	0.0432524	0.0432524	2.39989	2306	0
ERS451417_01954	1717.62.peg.1954	NA	NA	NA	1	26	Cargentoratense_DSM44202,"Catypicum_R2070","Caurimucosum_ATCC700975","Cbelfantii_FRC0043","Ccallunae_DSM20147","Cdiphtheriae_NCTC11397","Cepidermidicanis_DSM45586","Cfalsenii_DSM44353","Cglycinophilum_AJ3170","Cimitans_DSM44264","Cjeikeium_K41","Ckroppenstedtii_DSM44385","Clactis_RW25","Cmarinum_DSM44953","Cpseudotuberculosis_31","Cpseudotuberculosis_ATCC19410","CriegeliiPUDD83A45","Csilvaticum_K…	0.282402	0.282402	1.65257	0.282402	0.282402	1.65257	3330	0
ERS451417_00032	1717.62.peg.29	NA	NA	NA	1	12	Cbelfantii_FRC0043,"Ccallunae_DSM20147","Cdeserti_GIMN1010","Cdiphtheriae_NCTC11397","Cefficiens_YS314","Cglutamicum_ATCC13032","Cpseudotuberculosis_31","Crouxii_FRC0190","Csilvaticum_KL0182","Culcerans_NCTC12077","Culcerans_NCTC7910","Cvitaeruminis_DSM20294"	0.0774465	0.0774465	1.84383	0.0774465	0.0774465	1.84384	1026	3	1. 0.54278;2. 45;3. 133;4. 49;5. 45;6. 133;7. 54;8. 160;9. 58;10. V;11. GTG	1. 0.48422;2. 109;3. 325;4. 130;5. 111;6. 331;7. 120;8. 358;9. 247;10. L;11. TTA	1. 0.53476;2. 132;3. 394;4. 153;5. 134;6. 400;7. 143;8. 427;9. 316;10. M;11. ATG
ERS451417_01930	1717.62.peg.1927	NA	NA	NA	1	7	Cbelfantii_FRC0043,"Cdiphtheriae_NCTC11397","Cpseudotuberculosis_31","Cpseudotuberculosis_ATCC19410","Csilvaticum_KL0182","Culcerans_NCTC12077","Culcerans_NCTC7910"	0.439696	0.439696	7.72715	0.439696	0.439696	7.72715	258	0
ERS451417_02019	1717.62.peg.2024	NA	NA	NA	1	38	Cargentoratense_DSM44202,"Catypicum_R2070","Caurimucosum_ATCC700975","Cbelfantii_FRC0043","Ccallunae_DSM20147","Ccamporealensis_DSM44610","Cdeserti_GIMN1010","Cdiphtheriae_NCTC11397","Cdoosanense_DSM45436","Cefficiens_YS314","Cepidermidicanis_DSM45586","Cfalsenii_DSM44353","Cglutamicum_ATCC13032","Cglycinophilum_AJ3170","Chalotolerans_YIM70093","Chumireducens_DSM45392","Cimitans_DSM44264","Cjeike…	0.15973	0.153187	1.88222	0.15973	0.153187	1.88222	2	1	1. 0.6654;2. 16;3. 46;4. 22;5. 22;6. 64;7. 48;8. 142;9. 7;10. N;11. AAC
ERS451417_01045	1717.62.peg.1055	NA	NA	NA	1	39	Cargentoratense_DSM44202,"Catypicum_R2070","Caurimucosum_ATCC700975","Cbelfantii_FRC0043","Ccallunae_DSM20147","Ccamporealensis_DSM44610","Cdeserti_GIMN1010","Cdiphtheriae_NCTC11397","Cdoosanense_DSM45436","Cefficiens_YS314","Cepidermidicanis_DSM45586","Cfalsenii_DSM44353","Cglutamicum_ATCC13032","Cglycinophilum_AJ3170","Chalotolerans_YIM70093","Chumireducens_DSM45392","Cimitans_DSM44264","Cjeike…	0.24258	0.24258	1.54517	0.24258	0.24258	1.54518	258	0
ERS451417_01605	1717.62.peg.1614	NA	NA	NA	1	38	Cargentoratense_DSM44202,"Catypicum_R2070","Caurimucosum_ATCC700975","Cbelfantii_FRC0043","Ccallunae_DSM20147","Ccamporealensis_DSM44610","Cdeserti_GIMN1010","Cdiphtheriae_NCTC11397","Cdoosanense_DSM45436","Cefficiens_YS314","Cepidermidicanis_DSM45586","Cfalsenii_DSM44353","Cglutamicum_ATCC13032","Cglycinophilum_AJ3170","Chalotolerans_YIM70093","Chumireducens_DSM45392","Cimitans_DSM44264","Cjeike…	0.103539	0.103539	1.67544	0.103539	0.103539	1.67544	258	0
ERS451417_02057	1717.62.peg.2069	NA	NA	NA	1	38	Cargentoratense_DSM44202,"Catypicum_R2070","Caurimucosum_ATCC700975","Cbelfantii_FRC0043","Ccallunae_DSM20147","Ccamporealensis_DSM44610","Cdeserti_GIMN1010","Cdiphtheriae_NCTC11397","Cdoosanense_DSM45436","Cefficiens_YS314","Cepidermidicanis_DSM45586","Cfalsenii_DSM44353","Cglutamicum_ATCC13032","Cglycinophilum_AJ3170","Chalotolerans_YIM70093","Chumireducens_DSM45392","Cimitans_DSM44264","Cjeike…	0.192135	0.192135	1.73832	0.192135	0.192135	1.73832	2	2	1. 0.45076;2. 173;3. 517;4. 202;5. 202;6. 604;7. 208;8. 622;9. 433;10. H;11. CAT	1. 0.49562;2. 322;3. 964;4. 351;5. 351;6. 1051;7. 357;8. 1069;9. 856;10. R;11. CGC
ERS451417_00448	1717.62.peg.451	NA	NA	NA	1	17	Cbelfantii_FRC0043,"Ccallunae_DSM20147","Ccamporealensis_DSM44610","Cdeserti_GIMN1010","Cdiphtheriae_NCTC11397","Cepidermidicanis_DSM45586","Cglutamicum_ATCC13032","Ckutscheri_DSM20755","Cmustelae_DSM45274","Cpseudotuberculosis_31","Cpseudotuberculosis_ATCC19410","Crouxii_FRC0190","Csilvaticum_KL0182","Ctestudinoris_DSM44614","Culcerans_NCTC12077","Culcerans_NCTC7910","Cuterequi_DSM45634"	0.123487	0.123487	2.19058	0.123487	0.123487	2.19057	2	1	1. 0.63473;2. 64;3. 190;4. 82;5. 82;6. 244;7. 86;8. 256;9. 124;10. G;11. GGT
[truncated: 99 more rows]
[truncated: 7 more columns]
