# Supplementary material for: Evidence of episodic positive selection in Corynebacterium diphtheriae complex of species and its implementations in identification of drug and vaccine targets
Source: PeerJ. 2022 Feb 16;10:e12662. doi: 10.7717/peerj.12662 (PMC8857904; doi:10.7717/peerj.12662)
Supplement: Supplemental Information 12 [file peerj-10-12662-s012.xlsx]

## Sheet: Cul1
Gene	Transcript	Bonferroni	FDR	P-Value	P-Value raw	Number of species included	Species included	HA foreground omega	HA background omega	HA kappa	H0 foreground omega	H0 background omega	H0 kappa	Correction code	Number of Sites under positive Selection	Site under positve Selection 1(1. Probability to be under positive selection;2. Position in amino acid sequence of anchor species;3. Position in nucleotide sequence of anchor species;4.Position in main protein alignment:fastp.clustalw.aln;5. Position in protein clustal subalignment: .aln;6. Position in to codon backtranslated clustal subalignment: Codon_aln.fasta; 7. Position in prank alignment (…	Site under positve Selection 2	Site under positve Selection 3	Site under positve Selection 4	Site under positve Selection 5	Site under positve Selection 6	Site under positve Selection 7
ERS451417_02360	1717.62.peg.2389	0.0016668	0.0016668	0.0001852	0.0001852	12	Caurimucosum_ATCC700975,"Cbelfantii_FRC0043","Cdiphtheriae_NCTC11397","Ckroppenstedtii_DSM44385","Cpseudotuberculosis_31","Cpseudotuberculosis_ATCC19410","Csilvaticum_KL0182","Csimulans_PES1","Csingulare_IBSB52218","Culcerans_NCTC12077","Culcerans_NCTC7910","Cuterequi_DSM45634"	12.2767	0.120291	2.47661	0.220755	0.119096	2.44042	0	4	1. 0.46103;2. 248;3. 742;4. 296;5. 264;6. 790;7. 265;8. 793;9. 706;10. C;11. TGT	1. 0.78779;2. 251;3. 751;4. 301;5. 267;6. 799;7. 268;8. 802;9. 715;10. E;11. GAG	1. 0.76675;2. 255;3. 763;4. 305;5. 271;6. 811;7. 272;8. 814;9. 727;10. A;11. GCT	1. 0.785;2. 256;3. 766;4. 306;5. 272;6. 814;7. 273;8. 817;9. 730;10. L;11. TTG
ERS451417_00635	1717.62.peg.639	0.015057	0.0075285	0.001673	0.001673	7	Cbelfantii_FRC0043,"Cdiphtheriae_NCTC11397","Cpseudotuberculosis_31","Cpseudotuberculosis_ATCC19410","Crouxii_FRC0190","Culcerans_NCTC12077","Culcerans_NCTC7910"	8.60527	0.165111	2.79204	0.341875	0.167646	2.76384	0	1	1. 0.93365;2. 32;3. 94;4. 41;5. 41;6. 121;7. 32;8. 94;9. 94;10. I;11. ATC
ERS451417_00750	1717.62.peg.755	0.053379	0.017793	0.005931	0.005931	22	Cargentoratense_DSM44202,"Cbelfantii_FRC0043","Ccallunae_DSM20147","Cdeserti_GIMN1010","Cdiphtheriae_NCTC11397","Cefficiens_YS314","Cepidermidicanis_DSM45586","Cglutamicum_ATCC13032","Chalotolerans_YIM70093","Chumireducens_DSM45392","Ckroppenstedtii_DSM44385","Ckutscheri_DSM20755","Clactis_RW25","Cmarinum_DSM44953","Cmustelae_DSM45274","Cpseudotuberculosis_31","Cpseudotuberculosis_ATCC19410","Cro…	5.27779	0.19387	1.70516	0.23153	0.191	1.70227	0	1	1. 0.99113;2. 235;3. 703;4. 277;5. 265;6. 793;7. 304;8. 910;9. 577;10. E;11. GAA
ERS451417_00699	1717.62.peg.703	0.73458	0.183645	0.08162	0.08162	25	Catypicum_R2070,"Caurimucosum_ATCC700975","Cbelfantii_FRC0043","Ccallunae_DSM20147","Ccamporealensis_DSM44610","Cdeserti_GIMN1010","Cdiphtheriae_NCTC11397","Cefficiens_YS314","Cepidermidicanis_DSM45586","Cglutamicum_ATCC13032","Cglycinophilum_AJ3170","Chalotolerans_YIM70093","Chumireducens_DSM45392","Cmarinum_DSM44953","Cmustelae_DSM45274","Cpseudotuberculosis_31","Cpseudotuberculosis_ATCC19410",…	5.456	0.127155	1.67448	0.163412	0.127027	1.67334	0	1	1. 0.91368;2. 184;3. 550;4. 200;5. 189;6. 565;7. 199;8. 595;9. 430;10. E;11. GAA
ERS451417_00395	1717.62.peg.395	1	0.85968	0.4776	0.4776	39	Cargentoratense_DSM44202,"Catypicum_R2070","Caurimucosum_ATCC700975","Cbelfantii_FRC0043","Ccallunae_DSM20147","Ccamporealensis_DSM44610","Cdeserti_GIMN1010","Cdiphtheriae_NCTC11397","Cdoosanense_DSM45436","Cefficiens_YS314","Cepidermidicanis_DSM45586","Cfalsenii_DSM44353","Cglutamicum_ATCC13032","Cglycinophilum_AJ3170","Chalotolerans_YIM70093","Chumireducens_DSM45392","Cimitans_DSM44264","Cjeike…	82.9519	0.0168109	2.55997	1	0.0168109	2.55894	0	1	1. 0.95665;2. 24;3. 70;4. 24;5. 24;6. 70;7. 24;8. 70;9. 70;10. K;11. AAG
ERS451417_01544	1717.62.peg.1553	1	1	0.8608	0.8608	16	Cbelfantii_FRC0043,"Ccallunae_DSM20147","Cdeserti_GIMN1010","Cdiphtheriae_NCTC11397","Cefficiens_YS314","Cglutamicum_ATCC13032","Chalotolerans_YIM70093","Chumireducens_DSM45392","Cmarinum_DSM44953","Cpseudotuberculosis_31","Cpseudotuberculosis_ATCC19410","Csilvaticum_KL0182","Ctestudinoris_DSM44614","Culcerans_NCTC12077","Culcerans_NCTC7910","Cvitaeruminis_DSM20294"	1.21147	0.334872	1.70756	1	0.33518	1.7072	0	3	1. 0.94238;2. 60;3. 178;4. 71;5. 71;6. 211;7. 71;8. 211;9. 169;10. H;11. CAT	1. 0.53909;2. 84;3. 250;4. 96;5. 95;6. 283;7. 95;8. 283;9. 241;10. K;11. AAA	1. 0.8144;2. 113;3. 337;4. 125;5. 124;6. 370;7. 124;8. 370;9. 328;10. T;11. ACT
ERS451417_00197	1717.62.peg.194	1	1	1	1	5	Cbelfantii_FRC0043,"Cdiphtheriae_NCTC11397","Crouxii_FRC0190","Culcerans_NCTC12077","Culcerans_NCTC7910"	1	0.411262	3.8528	1	0.411262	3.85281	0	3	1. 0.5807;2. 98;3. 292;4. 250;5. 112;6. 334;7. 112;8. 334;9. 241;10. A;11. GCT	1. 0.68186;2. 182;3. 544;4. 349;5. 196;6. 586;7. 196;8. 586;9. 490;10. T;11. ACC	1. 0.60695;2. 272;3. 814;4. 470;5. 289;6. 865;7. 289;8. 865;9. 754;10. V;11. GTT
ERS451417_00739	1717.62.peg.742	1	1	1	1	39	Cargentoratense_DSM44202,"Catypicum_R2070","Caurimucosum_ATCC700975","Cbelfantii_FRC0043","Ccallunae_DSM20147","Ccamporealensis_DSM44610","Cdeserti_GIMN1010","Cdiphtheriae_NCTC11397","Cdoosanense_DSM45436","Cefficiens_YS314","Cepidermidicanis_DSM45586","Cfalsenii_DSM44353","Cglutamicum_ATCC13032","Cglycinophilum_AJ3170","Chalotolerans_YIM70093","Chumireducens_DSM45392","Cimitans_DSM44264","Cjeike…	0.99999	0.177425	1.79375	0.224126	0.177433	1.79306	0	1	1. 0.84065;2. 347;3. 1039;4. 385;5. 385;6. 1153;7. 439;8. 1315;9. 904;10. A;11. GCT
ERS451417_01604	1717.62.peg.1613	1	1	1	1	7	Cbelfantii_FRC0043,"Cdiphtheriae_NCTC11397","Cpseudotuberculosis_31","Cpseudotuberculosis_ATCC19410","Csilvaticum_KL0182","Culcerans_NCTC12077","Culcerans_NCTC7910"	0.881934	0.373217	5.08586	0.881934	0.373217	5.08586	0	6	1. 0.9115;2. 89;3. 265;4. 153;5. 89;6. 265;7. 89;8. 265;9. 241;10. E;11. GAA	1. 0.90949;2. 91;3. 271;4. 155;5. 91;6. 271;7. 91;8. 271;9. 247;10. A;11. GCC	1. 0.84461;2. 108;3. 322;4. 172;5. 108;6. 322;7. 108;8. 322;9. 298;10. D;11. GAT	1. 0.5559;2. 116;3. 346;4. 180;5. 116;6. 346;7. 116;8. 346;9. 322;10. A;11. GCC	1. 0.47793;2. 134;3. 400;4. 207;5. 134;6. 400;7. 134;8. 400;9. 376;10. E;11. GAA	1. 0.45827;2. 144;3. 430;4. 217;5. 144;6. 430;7. 144;8. 430;9. 406;10. P;11. CCG
ERS451417_01464	1717.62.peg.1474	NA	NA	NA	0.003978	9	Cbelfantii_FRC0043,"Cdiphtheriae_NCTC11397","Ckutscheri_DSM20755","Cmustelae_DSM45274","Cpseudotuberculosis_31","Cpseudotuberculosis_ATCC19410","Csilvaticum_KL0182","Culcerans_NCTC12077","Culcerans_NCTC7910"	0.109613	0.109613	2.08927	0.0314	0.0314	1.86657	258	0
ERS451417_02007	1717.62.peg.2012	NA	NA	NA	0.008232	14	Cbelfantii_FRC0043,"Cdeserti_GIMN1010","Cdiphtheriae_NCTC11397","Cefficiens_YS314","Cglutamicum_ATCC13032","Cglycinophilum_AJ3170","Chalotolerans_YIM70093","Ckutscheri_DSM20755","Cpseudotuberculosis_31","Cpseudotuberculosis_ATCC19410","Csilvaticum_KL0182","Ctestudinoris_DSM44614","Culcerans_NCTC12077","Culcerans_NCTC7910"	23.2488	0.03281	3.15341	0.0865986	0.03267	3.18524	3072	1	1. 0.95908;2. 56;3. 166;4. 56;5. 56;6. 166;7. 56;8. 166;9. 127;10. K;11. AAG
ERS451417_00007	1717.62.peg.8	NA	NA	NA	0.01866	6	Cbelfantii_FRC0043,"Cdiphtheriae_NCTC11397","Cglutamicum_ATCC13032","Crouxii_FRC0190","Csilvaticum_KL0182","Culcerans_NCTC7910"	40.1003	0.229408	3.0124	0.261474	0.261265	2.90752	4096	2	1. 0.41352;2. 46;3. 136;4. 52;5. 46;6. 136;7. 46;8. 136;9. 127;10. V;11. GTA	1. 0.48583;2. 72;3. 214;4. 80;5. 72;6. 214;7. 72;8. 214;9. 205;10. R;11. CGT
ERS451417_00637	1717.62.peg.641	NA	NA	NA	0.08584	38	Catypicum_R2070,"Caurimucosum_ATCC700975","Cbelfantii_FRC0043","Ccallunae_DSM20147","Ccamporealensis_DSM44610","Cdeserti_GIMN1010","Cdiphtheriae_NCTC11397","Cdoosanense_DSM45436","Cefficiens_YS314","Cepidermidicanis_DSM45586","Cfalsenii_DSM44353","Cglutamicum_ATCC13032","Cglycinophilum_AJ3170","Chalotolerans_YIM70093","Chumireducens_DSM45392","Cimitans_DSM44264","Cjeikeium_K41","Ckroppenstedtii_D…	5.37768	0.140866	1.30654	0.240112	0.140615	1.30254	2048	2	1. 0.92744;2. 11;3. 31;4. 19;5. 19;6. 55;7. 19;8. 55;9. 16;10. M;11. ATG	1. 0.70844;2. 122;3. 364;4. 138;5. 135;6. 403;7. 136;8. 406;9. 250;10. A;11. GCT
ERS451417_00755	1717.62.peg.760	NA	NA	NA	0.09487	39	Cargentoratense_DSM44202,"Catypicum_R2070","Caurimucosum_ATCC700975","Cbelfantii_FRC0043","Ccallunae_DSM20147","Ccamporealensis_DSM44610","Cdeserti_GIMN1010","Cdiphtheriae_NCTC11397","Cdoosanense_DSM45436","Cefficiens_YS314","Cepidermidicanis_DSM45586","Cfalsenii_DSM44353","Cglutamicum_ATCC13032","Cglycinophilum_AJ3170","Chalotolerans_YIM70093","Chumireducens_DSM45392","Cimitans_DSM44264","Cjeike…	0.105512	0.105512	2.27288	0.106177	0.106177	2.23575	258	0
ERS451417_00348	1717.62.peg.351	NA	NA	NA	0.1156	39	Cargentoratense_DSM44202,"Catypicum_R2070","Caurimucosum_ATCC700975","Cbelfantii_FRC0043","Ccallunae_DSM20147","Ccamporealensis_DSM44610","Cdeserti_GIMN1010","Cdiphtheriae_NCTC11397","Cdoosanense_DSM45436","Cefficiens_YS314","Cepidermidicanis_DSM45586","Cfalsenii_DSM44353","Cglutamicum_ATCC13032","Cglycinophilum_AJ3170","Chalotolerans_YIM70093","Chumireducens_DSM45392","Cimitans_DSM44264","Cjeike…	0.171996	0.100389	1.80037	0.127666	0.10037	1.80165	2	1	1. 0.98498;2. 65;3. 193;4. 74;5. 74;6. 220;7. 82;8. 244;9. 163;10. T;11. ACC
ERS451417_01641	1717.62.peg.1648	NA	NA	NA	0.1737	38	Cargentoratense_DSM44202,"Catypicum_R2070","Caurimucosum_ATCC700975","Cbelfantii_FRC0043","Ccallunae_DSM20147","Ccamporealensis_DSM44610","Cdeserti_GIMN1010","Cdiphtheriae_NCTC11397","Cdoosanense_DSM45436","Cefficiens_YS314","Cepidermidicanis_DSM45586","Cfalsenii_DSM44353","Cglutamicum_ATCC13032","Cglycinophilum_AJ3170","Chalotolerans_YIM70093","Chumireducens_DSM45392","Cimitans_DSM44264","Cjeike…	0.221277	0.221277	1.86602	0.233482	0.233482	1.85114	1282	0
ERS451417_00301	1717.62.peg.302	NA	NA	NA	0.1929	8	Cbelfantii_FRC0043,"Cdiphtheriae_NCTC11397","Cpseudotuberculosis_31","Cpseudotuberculosis_ATCC19410","Crouxii_FRC0190","Csilvaticum_KL0182","Culcerans_NCTC12077","Culcerans_NCTC7910"	0.137692	0.137692	2.59953	0.11327	0.11327	2.473	258	0
ERS451417_02242	1717.62.peg.2268	NA	NA	NA	0.1935	4	Cdiphtheriae_NCTC11397,"Cepidermidicanis_DSM45586","Culcerans_NCTC12077","Culcerans_NCTC7910"	0.391153	0.150987	2.01141	0.284257	0.150655	1.93674	2050	5	1. 0.98602;2. 54;3. 160;4. 58;5. 55;6. 163;7. 55;8. 163;9. 160;10. E;11. GAA	1. 0.45217;2. 55;3. 163;4. 59;5. 56;6. 166;7. 56;8. 166;9. 163;10. T;11. ACA	1. 0.54033;2. 56;3. 166;4. 60;5. 57;6. 169;7. 57;8. 169;9. 166;10. A;11. GCT	1. 0.94209;2. 73;3. 217;4. 77;5. 74;6. 220;7. 82;8. 244;9. 211;10. T;11. ACC	1. 0.57188;2. 114;3. 340;4. 120;5. 117;6. 349;7. 125;8. 373;9. 289;10. I;11. ATC
ERS451417_02397	1717.62.peg.2429	NA	NA	NA	0.2083	38	Cargentoratense_DSM44202,"Catypicum_R2070","Caurimucosum_ATCC700975","Cbelfantii_FRC0043","Ccallunae_DSM20147","Ccamporealensis_DSM44610","Cdeserti_GIMN1010","Cdiphtheriae_NCTC11397","Cdoosanense_DSM45436","Cefficiens_YS314","Cepidermidicanis_DSM45586","Cfalsenii_DSM44353","Cglutamicum_ATCC13032","Cglycinophilum_AJ3170","Chalotolerans_YIM70093","Chumireducens_DSM45392","Cimitans_DSM44264","Cjeike…	0.0344912	0.0344912	1.54433	0.0456122	0.0456122	1.49258	258	0
ERS451417_01398	1717.62.peg.1411	NA	NA	NA	0.2141	11	Cargentoratense_DSM44202,"Cbelfantii_FRC0043","Cdiphtheriae_NCTC11397","Cepidermidicanis_DSM45586","Cimitans_DSM44264","Cpseudotuberculosis_31","Cpseudotuberculosis_ATCC19410","Csilvaticum_KL0182","Culcerans_NCTC12077","Culcerans_NCTC7910","Cureicelerivorans_IMMIBRIV2301"	0.47317	0.316293	2.09553	0.409017	0.315691	2.09825	3074	4	1. 0.73892;2. 99;3. 295;4. 414;5. 132;6. 394;7. 134;8. 400;9. 268;10. G;11. GGC	1. 0.9929;2. 166;3. 496;4. 499;5. 206;6. 616;7. 208;8. 622;9. 427;10. C;11. TGT	1. 0.75171;2. 198;3. 592;4. 535;5. 238;6. 712;7. 240;8. 718;9. 523;10. H;11. CAC	1. 0.66597;2. 210;3. 628;4. 547;5. 250;6. 748;7. 252;8. 754;9. 559;10. I;11. ATC
ERS451417_00826	1717.62.peg.830	NA	NA	NA	0.2367	14	Cbelfantii_FRC0043,"Ccallunae_DSM20147","Cdeserti_GIMN1010","Cdiphtheriae_NCTC11397","Cefficiens_YS314","Cglutamicum_ATCC13032","Ckutscheri_DSM20755","Cmustelae_DSM45274","Cpseudotuberculosis_31","Cpseudotuberculosis_ATCC19410","Crouxii_FRC0190","Csilvaticum_KL0182","Culcerans_NCTC12077","Culcerans_NCTC7910"	0.218741	0.160143	2.14503	0.167745	0.160133	2.14142	3074	1	1. 0.85896;2. 71;3. 211;4. 144;5. 114;6. 340;7. 129;8. 385;9. 85;10. L;11. CTG
ERS451417_02293	1717.62.peg.2322	NA	NA	NA	0.2456	30	Cargentoratense_DSM44202,"Catypicum_R2070","Caurimucosum_ATCC700975","Cbelfantii_FRC0043","Ccallunae_DSM20147","Ccamporealensis_DSM44610","Cdeserti_GIMN1010","Cdiphtheriae_NCTC11397","Cefficiens_YS314","Cepidermidicanis_DSM45586","Cfalsenii_DSM44353","Cglutamicum_ATCC13032","Chumireducens_DSM45392","Cimitans_DSM44264","Ckroppenstedtii_DSM44385","Ckutscheri_DSM20755","Clactis_RW25","Cmarinum_DSM44…	168.14	0.169023	1.73143	0.17009	0.17009	1.72518	4	1	1. 0.96186;2. 5;3. 13;4. 5;5. 5;6. 13;7. 5;8. 13;9. 13;10. L;11. TTG
ERS451417_00135	1717.62.peg.134	NA	NA	NA	0.3094	14	Caurimucosum_ATCC700975,"Cbelfantii_FRC0043","Ccamporealensis_DSM44610","Cdiphtheriae_NCTC11397","Chumireducens_DSM45392","Cmaris_DSM45190","Cmustelae_DSM45274","Cpseudotuberculosis_31","Crouxii_FRC0190","Csilvaticum_KL0182","Csingulare_IBSB52218","Culcerans_NCTC12077","Culcerans_NCTC7910","Cuterequi_DSM45634"	2.27971	0.0542646	1.79146	0.122077	0.0544096	1.79907	2048	2	1. 0.66932;2. 112;3. 334;4. 140;5. 130;6. 388;7. 164;8. 490;9. 196;10. A;11. GCG	1. 0.71565;2. 224;3. 670;4. 264;5. 242;6. 724;7. 281;8. 841;9. 448;10. V;11. GTG
ERS451417_02148	1717.62.peg.2170	NA	NA	NA	0.3185	8	Cbelfantii_FRC0043,"Cdiphtheriae_NCTC11397","Clactis_RW25","Cpseudotuberculosis_31","Cpseudotuberculosis_ATCC19410","Csilvaticum_KL0182","Culcerans_NCTC12077","Culcerans_NCTC7910"	0.34843	0.106139	2.45167	1	0.105886	2.46626	3074	2	1. 0.77233;2. 77;3. 229;4. 172;5. 90;6. 268;7. 93;8. 277;9. 139;10. V;11. GTT	1. 0.77881;2. 185;3. 553;4. 297;5. 215;6. 643;7. 227;8. 679;9. 415;10. E;11. GAA
ERS451417_02276	1717.62.peg.2305	NA	NA	NA	0.3236	23	Catypicum_R2070,"Caurimucosum_ATCC700975","Cbelfantii_FRC0043","Ccallunae_DSM20147","Ccamporealensis_DSM44610","Cdeserti_GIMN1010","Cdiphtheriae_NCTC11397","Cdoosanense_DSM45436","Cglutamicum_ATCC13032","Chalotolerans_YIM70093","Chumireducens_DSM45392","Cmarinum_DSM44953","Cmaris_DSM45190","Cmustelae_DSM45274","Cpseudotuberculosis_31","Cpseudotuberculosis_ATCC19410","Csilvaticum_KL0182","Csimulan…	0.226333	0.167609	1.56465	0.182286	0.170876	1.56108	7170	2	1. 0.52424;2. 126;3. 376;4. 550;5. 149;6. 445;7. 171;8. 511;9. 274;10. L;11. CTC	1. 0.47014;2. 220;3. 658;4. 647;5. 245;6. 733;7. 267;8. 799;9. 514;10. V;11. GTA
ERS451417_00470	1717.62.peg.474	NA	NA	NA	0.3328	8	Cbelfantii_FRC0043,"Cdiphtheriae_NCTC11397","Cpseudotuberculosis_31","Cpseudotuberculosis_ATCC19410","Crouxii_FRC0190","Csilvaticum_KL0182","Culcerans_NCTC12077","Culcerans_NCTC7910"	999	0.152341	3.00665	1	0.153827	3.00234	4	1	1. 0.45616;2. 217;3. 649;4. 230;5. 223;6. 667;7. 225;8. 673;9. 625;10. L;11. CTA
ERS451417_02229	1717.62.peg.2254	NA	NA	NA	0.4025	28	Catypicum_R2070,"Caurimucosum_ATCC700975","Cbelfantii_FRC0043","Ccallunae_DSM20147","Ccamporealensis_DSM44610","Cdeserti_GIMN1010","Cdiphtheriae_NCTC11397","Cdoosanense_DSM45436","Cepidermidicanis_DSM45586","Cfalsenii_DSM44353","Cglutamicum_ATCC13032","Chalotolerans_YIM70093","Chumireducens_DSM45392","Cimitans_DSM44264","Ckutscheri_DSM20755","Cmarinum_DSM44953","Cmaris_DSM45190","Cmustelae_DSM452…	0.243522	0.243522	1.62308	0.991466	0.243032	1.62493	2306	0
ERS451417_00215	1717.62.peg.212	NA	NA	NA	0.4198	11	Cbelfantii_FRC0043,"Ccallunae_DSM20147","Cdiphtheriae_NCTC11397","Ckutscheri_DSM20755","Cmustelae_DSM45274","Cpseudotuberculosis_ATCC19410","Crouxii_FRC0190","Csilvaticum_KL0182","Culcerans_NCTC12077","Culcerans_NCTC7910","Cvitaeruminis_DSM20294"	998.99	0.0746346	2.38415	1	0.0746251	2.38226	4	1	1. 0.9706;2. 57;3. 169;4. 87;5. 58;6. 172;7. 58;8. 172;9. 169;10. D;11. GAT
ERS451417_01618	1717.62.peg.1626	NA	NA	NA	0.434	9	Cbelfantii_FRC0043,"Cdiphtheriae_NCTC11397","Chalotolerans_YIM70093","Cmarinum_DSM44953","Cpseudotuberculosis_31","Cpseudotuberculosis_ATCC19410","Csilvaticum_KL0182","Culcerans_NCTC12077","Culcerans_NCTC7910"	999	0.16908	2.27216	1	0.169014	2.27136	260	0
ERS451417_00722	1717.62.peg.727	NA	NA	NA	0.4374	19	Caurimucosum_ATCC700975,"Cbelfantii_FRC0043","Ccamporealensis_DSM44610","Cdiphtheriae_NCTC11397","Cfalsenii_DSM44353","Cglycinophilum_AJ3170","Ckroppenstedtii_DSM44385","Ckutscheri_DSM20755","Cmustelae_DSM45274","Cpseudotuberculosis_31","Cpseudotuberculosis_ATCC19410","Crouxii_FRC0190","Csilvaticum_KL0182","Csimulans_PES1","Csingulare_IBSB52218","Cterpenotabidum_Y11","Culcerans_NCTC12077","Culcer…	0.0813354	0.0813354	1.99226	0.0872101	0.0872101	2.02053	2	2	1. 0.40325;2. 16;3. 46;4. 42;5. 42;6. 124;7. 93;8. 277;9. 22;10. S;11. AGT	1. 0.51332;2. 334;3. 1000;4. 360;5. 360;6. 1078;7. 419;8. 1255;9. 877;10. K;11. AAG
ERS451417_02387	1717.62.peg.2419	NA	NA	NA	0.4477	18	Caurimucosum_ATCC700975,"Cbelfantii_FRC0043","Ccamporealensis_DSM44610","Cdiphtheriae_NCTC11397","Cdoosanense_DSM45436","Chalotolerans_YIM70093","Chumireducens_DSM45392","Cmarinum_DSM44953","Cmaris_DSM45190","Cmustelae_DSM45274","Cpseudotuberculosis_31","Cpseudotuberculosis_ATCC19410","Csilvaticum_KL0182","Csimulans_PES1","Csingulare_IBSB52218","Ctestudinoris_DSM44614","Culcerans_NCTC7910","Cvita…	0.488565	0.244851	1.99084	0.252056	0.245266	1.98525	4098	2	1. 0.45517;2. 59;3. 175;4. 74;5. 63;6. 187;7. 66;8. 196;9. 139;10. A;11. GCA	1. 0.52544;2. 98;3. 292;4. 115;5. 104;6. 310;7. 105;8. 313;9. 256;10. A;11. GCA
ERS451417_00928	1717.62.peg.935	NA	NA	NA	0.4778	20	Caurimucosum_ATCC700975,"Cbelfantii_FRC0043","Ccamporealensis_DSM44610","Cdiphtheriae_NCTC11397","Cdoosanense_DSM45436","Chalotolerans_YIM70093","Chumireducens_DSM45392","Cmarinum_DSM44953","Cmaris_DSM45190","Cpseudotuberculosis_31","Cpseudotuberculosis_ATCC19410","Crouxii_FRC0190","Csilvaticum_KL0182","Csimulans_PES1","Csingulare_IBSB52218","Ctestudinoris_DSM44614","Culcerans_NCTC12077","Culcera…	0.299933	0.201144	1.58228	0.274279	0.201296	1.5844	3074	5	1. 0.51196;2. 76;3. 226;4. 142;5. 84;6. 250;7. 108;8. 322;9. 79;10. G;11. GGC	1. 0.67028;2. 77;3. 229;4. 143;5. 85;6. 253;7. 109;8. 325;9. 82;10. H;11. CAT	1. 0.91064;2. 85;3. 253;4. 151;5. 93;6. 277;7. 117;8. 349;9. 106;10. N;11. AAC	1. 0.72396;2. 178;3. 532;4. 247;5. 189;6. 565;7. 213;8. 637;9. 364;10. A;11. GCG	1. 0.62683;2. 186;3. 556;4. 255;5. 197;6. 589;7. 221;8. 661;9. 388;10. L;11. CTT
ERS451417_01986	1717.62.peg.1986	NA	NA	NA	0.4778	26	Cargentoratense_DSM44202,"Caurimucosum_ATCC700975","Cbelfantii_FRC0043","Ccallunae_DSM20147","Ccamporealensis_DSM44610","Cdeserti_GIMN1010","Cdiphtheriae_NCTC11397","Cdoosanense_DSM45436","Cepidermidicanis_DSM45586","Chalotolerans_YIM70093","Chumireducens_DSM45392","Clactis_RW25","Cmarinum_DSM44953","Cmustelae_DSM45274","Cpseudotuberculosis_31","Cpseudotuberculosis_ATCC19410","CriegeliiPUDD83A45"…	999	0.04802	1.36485	1	0.04802	1.36438	4	1	1. 0.87244;2. 24;3. 70;4. 58;5. 32;6. 94;7. 43;8. 127;9. 58;10. A;11. GCT
ERS451417_00643	1717.62.peg.647	NA	NA	NA	0.5011	19	Cargentoratense_DSM44202,"Caurimucosum_ATCC700975","Cbelfantii_FRC0043","Cdiphtheriae_NCTC11397","Cepidermidicanis_DSM45586","Chalotolerans_YIM70093","Chumireducens_DSM45392","Ckutscheri_DSM20755","Cmustelae_DSM45274","Cpseudotuberculosis_31","Cpseudotuberculosis_ATCC19410","Crouxii_FRC0190","Csilvaticum_KL0182","Csimulans_PES1","Csingulare_IBSB52218","Ctestudinoris_DSM44614","Culcerans_NCTC12077…	999	0.0750954	1.51697	1	0.0751051	1.5168	260	0
ERS451417_00923	1717.62.peg.930	NA	NA	NA	0.5668	5	Cbelfantii_FRC0043,"Cdiphtheriae_NCTC11397","Crouxii_FRC0190","Culcerans_NCTC12077","Culcerans_NCTC7910"	999	0.131672	2.1893	1	0.132307	2.18206	260	0
ERS451417_01899	1717.62.peg.1896	NA	NA	NA	0.6434	7	Cbelfantii_FRC0043,"Cdiphtheriae_NCTC11397","Cpseudotuberculosis_31","Cpseudotuberculosis_ATCC19410","Csilvaticum_KL0182","Culcerans_NCTC12077","Culcerans_NCTC7910"	0.099455	0.0806447	3.42531	0.0812328	0.0811651	3.41842	2	2	1. 0.55341;2. 16;3. 46;4. 20;5. 16;6. 46;7. 16;8. 46;9. 46;10. A;11. GCT	1. 0.53013;2. 220;3. 658;4. 229;5. 220;6. 658;7. 220;8. 658;9. 658;10. G;11. GGT
ERS451417_00841	1717.62.peg.846	NA	NA	NA	0.6488	4	Cbelfantii_FRC0043,"Cdiphtheriae_NCTC11397","Crouxii_FRC0190","Culcerans_NCTC7910"	0.911518	0.0942231	1.93111	0.470647	0.0939823	1.87131	4096	5	1. 0.90267;2. 31;3. 91;4. 45;5. 31;6. 91;7. 31;8. 91;9. 88;10. R;11. CGC	1. 0.91684;2. 70;3. 208;4. 84;5. 70;6. 208;7. 70;8. 208;9. 205;10. V;11. GTC	1. 0.9167;2. 78;3. 232;4. 92;5. 78;6. 232;7. 78;8. 232;9. 229;10. E;11. GAA	1. 0.92376;2. 144;3. 430;4. 167;5. 144;6. 430;7. 149;8. 445;9. 376;10. K;11. AAG	1. 0.90538;2. 199;3. 595;4. 238;5. 201;6. 601;7. 204;8. 610;9. 541;10. E;11. GAA
ERS451417_01823	1717.62.peg.1828	NA	NA	NA	0.6789	6	Cbelfantii_FRC0043,"Cdiphtheriae_NCTC11397","Cpseudotuberculosis_ATCC19410","Csilvaticum_KL0182","Culcerans_NCTC12077","Culcerans_NCTC7910"	0.367952	0.306747	4.47679	0.353219	0.305107	4.37511	2	2	1. 0.63479;2. 40;3. 118;4. 45;5. 40;6. 118;7. 40;8. 118;9. 112;10. N;11. AAC	1. 0.56504;2. 111;3. 331;4. 157;5. 111;6. 331;7. 111;8. 331;9. 325;10. N;11. AAC
ERS451417_00381	1717.62.peg.381	NA	NA	NA	0.7321	9	Cbelfantii_FRC0043,"Cdiphtheriae_NCTC11397","Cglycinophilum_AJ3170","Cpseudotuberculosis_31","Cpseudotuberculosis_ATCC19410","Crouxii_FRC0190","Csilvaticum_KL0182","Culcerans_NCTC12077","Culcerans_NCTC7910"	0.518943	0.207497	3.57122	0.335594	0.20788	3.57333	1026	6	1. 0.66089;2. 217;3. 649;4. 298;5. 280;6. 838;7. 357;8. 1069;9. 490;10. G;11. GGG	1. 0.79869;2. 232;3. 694;4. 321;5. 303;6. 907;7. 385;8. 1153;9. 517;10. A;11. GCA	1. 0.43049;2. 252;3. 754;4. 341;5. 323;6. 967;7. 405;8. 1213;9. 577;10. D;11. GAT	1. 0.49951;2. 261;3. 781;4. 350;5. 332;6. 994;7. 414;8. 1240;9. 604;10. P;11. CCG	1. 0.69756;2. 275;3. 823;4. 368;5. 346;6. 1036;7. 428;8. 1282;9. 646;10. I;11. ATT	1. 0.50022;2. 349;3. 1045;4. 452;5. 426;6. 1276;7. 508;8. 1522;9. 859;10. V;11. GTT
ERS451417_01235	1717.62.peg.1243	NA	NA	NA	0.7929	15	Cargentoratense_DSM44202,"Cbelfantii_FRC0043","Cdiphtheriae_NCTC11397","Cepidermidicanis_DSM45586","Ckroppenstedtii_DSM44385","Ckutscheri_DSM20755","Clactis_RW25","Cmustelae_DSM45274","Cpseudotuberculosis_31","Cpseudotuberculosis_ATCC19410","Crouxii_FRC0190","Csilvaticum_KL0182","Culcerans_NCTC12077","Culcerans_NCTC7910","Cvitaeruminis_DSM20294"	0.219779	0.146113	2.60865	0.162596	0.145883	2.60894	2050	1	1. 0.70177;2. 201;3. 601;4. 201;5. 201;6. 601;7. 201;8. 601;9. 433;10. V;11. GTC
ERS451417_00159	1717.62.peg.157	NA	NA	NA	0.8538	5	Cdiphtheriae_NCTC11397,"Cpseudotuberculosis_31","Cpseudotuberculosis_ATCC19410","Culcerans_NCTC12077","Culcerans_NCTC7910"	0.296141	0.239567	4.24768	0.271154	0.239937	4.24894	2	1	1. 0.65035;2. 52;3. 154;4. 57;5. 56;6. 166;7. 64;8. 190;9. 103;10. K;11. AAA
ERS451417_00466	1717.62.peg.470	NA	NA	NA	0.9012	12	Cbelfantii_FRC0043,"Cdiphtheriae_NCTC11397","Ckutscheri_DSM20755","Cmustelae_DSM45274","Cpseudotuberculosis_31","Cpseudotuberculosis_ATCC19410","Crouxii_FRC0190","Csilvaticum_KL0182","Culcerans_NCTC12077","Culcerans_NCTC7910","Cuterequi_DSM45634","Cvitaeruminis_DSM20294"	0.239034	0.23185	1.8554	0.232064	0.232035	1.85534	3074	1	1. 0.69139;2. 343;3. 1027;4. 498;5. 367;6. 1099;7. 383;8. 1147;9. 943;10. N;11. AAT
ERS451417_02343	1717.62.peg.2371	NA	NA	NA	0.9756	7	Cbelfantii_FRC0043,"Ccamporealensis_DSM44610","Cdiphtheriae_NCTC11397","Csingulare_IBSB52218","Culcerans_NCTC12077","Culcerans_NCTC7910","Curealyticum_DSM7109"	0.252661	0.252267	2.0852	0.700325	0.252257	2.08521	258	0
ERS451417_00367	1717.62.peg.366	NA	NA	NA	0.9772	8	Cbelfantii_FRC0043,"Cdiphtheriae_NCTC11397","Cpseudotuberculosis_31","Cpseudotuberculosis_ATCC19410","Crouxii_FRC0190","Csilvaticum_KL0182","Culcerans_NCTC12077","Culcerans_NCTC7910"	0.0932265	0.0926884	2.27988	0.0927458	0.0927458	2.2801	2	2	1. 0.544;2. 114;3. 340;4. 138;5. 123;6. 367;7. 132;8. 394;9. 277;10. E;11. GAA	1. 0.55318;2. 237;3. 709;4. 524;5. 262;6. 784;7. 279;8. 835;9. 625;10. K;11. AAG
ERS451417_02352	1717.62.peg.2380	NA	NA	NA	0.9842	5	Cbelfantii_FRC0043,"Cdiphtheriae_NCTC11397","Csilvaticum_KL0182","Culcerans_NCTC12077","Culcerans_NCTC7910"	0.24228	0.242261	2.39409	0.242253	0.242253	2.39411	2	2	1. 0.52149;2. 346;3. 1036;4. 349;5. 349;6. 1045;7. 349;8. 1045;9. 913;10. F;11. TTC	1. 0.46322;2. 735;3. 2203;4. 762;5. 755;6. 2263;7. 776;8. 2326;9. 1828;10. T;11. ACC
ERS451417_00482	1717.62.peg.485	NA	NA	NA	0.9866	39	Cargentoratense_DSM44202,"Catypicum_R2070","Caurimucosum_ATCC700975","Cbelfantii_FRC0043","Ccallunae_DSM20147","Ccamporealensis_DSM44610","Cdeserti_GIMN1010","Cdiphtheriae_NCTC11397","Cdoosanense_DSM45436","Cefficiens_YS314","Cepidermidicanis_DSM45586","Cfalsenii_DSM44353","Cglutamicum_ATCC13032","Cglycinophilum_AJ3170","Chalotolerans_YIM70093","Chumireducens_DSM45392","Cimitans_DSM44264","Cjeike…	0.200867	0.200867	2.12317	0.200945	0.200877	2.12316	2306	0
ERS451417_01527	1717.62.peg.1536	NA	NA	NA	0.9909	37	Cargentoratense_DSM44202,"Catypicum_R2070","Caurimucosum_ATCC700975","Cbelfantii_FRC0043","Ccallunae_DSM20147","Ccamporealensis_DSM44610","Cdeserti_GIMN1010","Cdiphtheriae_NCTC11397","Cdoosanense_DSM45436","Cefficiens_YS314","Cepidermidicanis_DSM45586","Cfalsenii_DSM44353","Cglutamicum_ATCC13032","Cglycinophilum_AJ3170","Chalotolerans_YIM70093","Chumireducens_DSM45392","Cimitans_DSM44264","Cjeike…	0.119276	0.119276	1.66505	0.119276	0.119276	1.66513	258	0
ERS451417_01786	1717.62.peg.1791	NA	NA	NA	0.9916	6	Cbelfantii_FRC0043,"Cdiphtheriae_NCTC11397","Cpseudotuberculosis_ATCC19410","Csilvaticum_KL0182","Culcerans_NCTC12077","Culcerans_NCTC7910"	0.218817	0.218817	2.79462	0.218817	0.218817	2.79462	2	5	1. 0.46005;2. 231;3. 691;4. 384;5. 234;6. 700;7. 235;8. 703;9. 673;10. V;11. GTC	1. 0.47149;2. 248;3. 742;4. 401;5. 251;6. 751;7. 252;8. 754;9. 724;10. V;11. GTC	1. 0.6138;2. 290;3. 868;4. 443;5. 293;6. 877;7. 294;8. 880;9. 850;10. I;11. ATC	1. 0.47098;2. 297;3. 889;4. 450;5. 300;6. 898;7. 301;8. 901;9. 871;10. D;11. GAT	1. 0.53169;2. 504;3. 1510;4. 784;5. 518;6. 1552;7. 532;8. 1594;9. 1408;10. V;11. GTC
ERS451417_01574	1717.62.peg.1583	NA	NA	NA	0.9916	29	Cargentoratense_DSM44202,"Caurimucosum_ATCC700975","Cbelfantii_FRC0043","Ccallunae_DSM20147","Ccamporealensis_DSM44610","Cdeserti_GIMN1010","Cdiphtheriae_NCTC11397","Cdoosanense_DSM45436","Cglutamicum_ATCC13032","Chumireducens_DSM45392","Cimitans_DSM44264","Cjeikeium_K41","Ckutscheri_DSM20755","Clactis_RW25","Cmarinum_DSM44953","Cmaris_DSM45190","Cmustelae_DSM45274","Cpseudotuberculosis_31","Cpse…	0.233613	0.233613	1.78341	0.233613	0.233613	1.78341	2	1	1. 0.48459;2. 801;3. 2401;4. 860;5. 807;6. 2419;7. 829;8. 2485;9. 2281;10. K;11. AAG
ERS451417_00777	1717.62.peg.784	NA	NA	NA	0.9917	39	Cargentoratense_DSM44202,"Catypicum_R2070","Caurimucosum_ATCC700975","Cbelfantii_FRC0043","Ccallunae_DSM20147","Ccamporealensis_DSM44610","Cdeserti_GIMN1010","Cdiphtheriae_NCTC11397","Cdoosanense_DSM45436","Cefficiens_YS314","Cepidermidicanis_DSM45586","Cfalsenii_DSM44353","Cglutamicum_ATCC13032","Cglycinophilum_AJ3170","Chalotolerans_YIM70093","Chumireducens_DSM45392","Cimitans_DSM44264","Cjeike…	0.157254	0.157254	1.9009	0.157253	0.157253	1.9009	258	0
ERS451417_01152	1717.62.peg.1163	NA	NA	NA	0.9921	39	Cargentoratense_DSM44202,"Catypicum_R2070","Caurimucosum_ATCC700975","Cbelfantii_FRC0043","Ccallunae_DSM20147","Ccamporealensis_DSM44610","Cdeserti_GIMN1010","Cdiphtheriae_NCTC11397","Cdoosanense_DSM45436","Cefficiens_YS314","Cepidermidicanis_DSM45586","Cfalsenii_DSM44353","Cglutamicum_ATCC13032","Cglycinophilum_AJ3170","Chalotolerans_YIM70093","Chumireducens_DSM45392","Cimitans_DSM44264","Cjeike…	0.113391	0.113391	1.5698	0.113391	0.113391	1.56979	2	1	1. 0.52982;2. 932;3. 2794;4. 965;5. 965;6. 2893;7. 980;8. 2938;9. 2704;10. Q;11. CAA
ERS451417_00291	1717.62.peg.292	NA	NA	NA	0.9922	39	Cargentoratense_DSM44202,"Catypicum_R2070","Caurimucosum_ATCC700975","Cbelfantii_FRC0043","Ccallunae_DSM20147","Ccamporealensis_DSM44610","Cdeserti_GIMN1010","Cdiphtheriae_NCTC11397","Cdoosanense_DSM45436","Cefficiens_YS314","Cepidermidicanis_DSM45586","Cfalsenii_DSM44353","Cglutamicum_ATCC13032","Cglycinophilum_AJ3170","Chalotolerans_YIM70093","Chumireducens_DSM45392","Cimitans_DSM44264","Cjeike…	0.0989458	0.0989458	1.76154	0.0989458	0.0989458	1.76154	258	0
ERS451417_00704	1717.62.peg.709	NA	NA	NA	0.9927	38	Cargentoratense_DSM44202,"Catypicum_R2070","Caurimucosum_ATCC700975","Cbelfantii_FRC0043","Ccallunae_DSM20147","Ccamporealensis_DSM44610","Cdeserti_GIMN1010","Cdiphtheriae_NCTC11397","Cdoosanense_DSM45436","Cefficiens_YS314","Cepidermidicanis_DSM45586","Cfalsenii_DSM44353","Cglutamicum_ATCC13032","Cglycinophilum_AJ3170","Chalotolerans_YIM70093","Chumireducens_DSM45392","Cimitans_DSM44264","Cjeike…	0.120438	0.120438	2.00393	0.120428	0.120428	2.00393	1282	0
ERS451417_01214	1717.62.peg.1222	NA	NA	NA	0.9927	26	Cargentoratense_DSM44202,"Caurimucosum_ATCC700975","Ccamporealensis_DSM44610","Cdiphtheriae_NCTC11397","Cdoosanense_DSM45436","Cepidermidicanis_DSM45586","Chalotolerans_YIM70093","Chumireducens_DSM45392","Cimitans_DSM44264","Cjeikeium_K41","Cmarinum_DSM44953","Cmaris_DSM45190","Cmustelae_DSM45274","Cpseudotuberculosis_31","Cpseudotuberculosis_ATCC19410","CriegeliiPUDD83A45","Crouxii_FRC0190","Csi…	0.226874	0.226874	1.67114	0.226874	0.226874	1.67111	3330	0
ERS451417_00414	1717.62.peg.414	NA	NA	NA	0.9931	11	Catypicum_R2070,"Cbelfantii_FRC0043","Cdiphtheriae_NCTC11397","Cepidermidicanis_DSM45586","Ckutscheri_DSM20755","Cpseudotuberculosis_31","Cpseudotuberculosis_ATCC19410","Crouxii_FRC0190","Csilvaticum_KL0182","Culcerans_NCTC12077","Culcerans_NCTC7910"	0.120394	0.120394	2.34077	0.120394	0.120394	2.34076	258	0
ERS451417_00596	1717.62.peg.600	NA	NA	NA	0.9931	30	Cargentoratense_DSM44202,"Caurimucosum_ATCC700975","Cbelfantii_FRC0043","Ccallunae_DSM20147","Ccamporealensis_DSM44610","Cdeserti_GIMN1010","Cdiphtheriae_NCTC11397","Cdoosanense_DSM45436","Cefficiens_YS314","Cepidermidicanis_DSM45586","Cglutamicum_ATCC13032","Chalotolerans_YIM70093","Chumireducens_DSM45392","Cimitans_DSM44264","Ckutscheri_DSM20755","Clactis_RW25","Cmarinum_DSM44953","Cmaris_DSM45…	0.0790109	0.0790109	2.1223	0.0790207	0.0790109	2.12232	2	2	1. 0.50514;2. 354;3. 1060;4. 379;5. 379;6. 1135;7. 449;8. 1345;9. 829;10. L;11. CTC	1. 0.41301;2. 443;3. 1327;4. 468;5. 468;6. 1402;7. 538;8. 1612;9. 1096;10. V;11. GTT
ERS451417_00758	1717.62.peg.763	NA	NA	NA	0.994	39	Cargentoratense_DSM44202,"Catypicum_R2070","Caurimucosum_ATCC700975","Cbelfantii_FRC0043","Ccallunae_DSM20147","Ccamporealensis_DSM44610","Cdeserti_GIMN1010","Cdiphtheriae_NCTC11397","Cdoosanense_DSM45436","Cefficiens_YS314","Cepidermidicanis_DSM45586","Cfalsenii_DSM44353","Cglutamicum_ATCC13032","Cglycinophilum_AJ3170","Chalotolerans_YIM70093","Chumireducens_DSM45392","Cimitans_DSM44264","Cjeike…	7.50974	0.117585	2.72259	0.206246	0.117585	2.72259	2304	0
ERS451417_00627	1717.62.peg.631	NA	NA	NA	0.994	27	Cargentoratense_DSM44202,"Catypicum_R2070","Cbelfantii_FRC0043","Ccallunae_DSM20147","Cdeserti_GIMN1010","Cdiphtheriae_NCTC11397","Cdoosanense_DSM45436","Cefficiens_YS314","Cfalsenii_DSM44353","Cglutamicum_ATCC13032","Cglycinophilum_AJ3170","Chalotolerans_YIM70093","Cjeikeium_K41","Ckutscheri_DSM20755","Clactis_RW25","Cmaris_DSM45190","Cmustelae_DSM45274","Cpseudotuberculosis_31","Cpseudotubercul…	0.147485	0.147485	1.66684	0.147485	0.147485	1.66684	2	1	1. 0.42506;2. 330;3. 988;4. 363;5. 363;6. 1087;7. 406;8. 1216;9. 940;10. E;11. GAG
ERS451417_01507	1717.62.peg.1515	NA	NA	NA	0.9948	38	Cargentoratense_DSM44202,"Catypicum_R2070","Caurimucosum_ATCC700975","Cbelfantii_FRC0043","Ccallunae_DSM20147","Ccamporealensis_DSM44610","Cdeserti_GIMN1010","Cdiphtheriae_NCTC11397","Cdoosanense_DSM45436","Cefficiens_YS314","Cepidermidicanis_DSM45586","Cfalsenii_DSM44353","Cglutamicum_ATCC13032","Cglycinophilum_AJ3170","Chalotolerans_YIM70093","Chumireducens_DSM45392","Cimitans_DSM44264","Cjeike…	0.145778	0.145778	1.71932	0.145778	0.145778	1.7193	2050	1	1. 0.53871;2. 316;3. 946;4. 336;5. 336;6. 1006;7. 359;8. 1075;9. 601;10. R;11. CGT
ERS451417_00402	1717.62.peg.402	NA	NA	NA	0.9953	39	Cargentoratense_DSM44202,"Catypicum_R2070","Caurimucosum_ATCC700975","Cbelfantii_FRC0043","Ccallunae_DSM20147","Ccamporealensis_DSM44610","Cdeserti_GIMN1010","Cdiphtheriae_NCTC11397","Cdoosanense_DSM45436","Cefficiens_YS314","Cepidermidicanis_DSM45586","Cfalsenii_DSM44353","Cglutamicum_ATCC13032","Cglycinophilum_AJ3170","Chalotolerans_YIM70093","Chumireducens_DSM45392","Cimitans_DSM44264","Cjeike…	0.487699	0.110053	2.35313	0.21983	0.110053	2.35311	258	0
ERS451417_02059	1717.62.peg.2071	NA	NA	NA	0.9955	38	Cargentoratense_DSM44202,"Catypicum_R2070","Caurimucosum_ATCC700975","Cbelfantii_FRC0043","Ccallunae_DSM20147","Ccamporealensis_DSM44610","Cdeserti_GIMN1010","Cdiphtheriae_NCTC11397","Cdoosanense_DSM45436","Cefficiens_YS314","Cepidermidicanis_DSM45586","Cfalsenii_DSM44353","Cglutamicum_ATCC13032","Cglycinophilum_AJ3170","Chalotolerans_YIM70093","Chumireducens_DSM45392","Cimitans_DSM44264","Cjeike…	0.175672	0.175672	1.95789	0.175681	0.175681	1.95789	2	1	1. 0.58001;2. 230;3. 688;4. 254;5. 254;6. 760;7. 287;8. 859;9. 604;10. T;11. ACC
ERS451417_00582	1717.62.peg.585	NA	NA	NA	0.9958	39	Cargentoratense_DSM44202,"Catypicum_R2070","Caurimucosum_ATCC700975","Cbelfantii_FRC0043","Ccallunae_DSM20147","Ccamporealensis_DSM44610","Cdeserti_GIMN1010","Cdiphtheriae_NCTC11397","Cdoosanense_DSM45436","Cefficiens_YS314","Cepidermidicanis_DSM45586","Cfalsenii_DSM44353","Cglutamicum_ATCC13032","Cglycinophilum_AJ3170","Chalotolerans_YIM70093","Chumireducens_DSM45392","Cimitans_DSM44264","Cjeike…	0.115185	0.115185	2.04014	0.115185	0.115185	2.04015	258	0
ERS451417_01320	1717.62.peg.1328	NA	NA	NA	0.9958	37	Cargentoratense_DSM44202,"Catypicum_R2070","Caurimucosum_ATCC700975","Cbelfantii_FRC0043","Ccallunae_DSM20147","Ccamporealensis_DSM44610","Cdeserti_GIMN1010","Cdiphtheriae_NCTC11397","Cdoosanense_DSM45436","Cefficiens_YS314","Cepidermidicanis_DSM45586","Cfalsenii_DSM44353","Cglutamicum_ATCC13032","Cglycinophilum_AJ3170","Chalotolerans_YIM70093","Chumireducens_DSM45392","Cimitans_DSM44264","Cjeike…	0.669726	0.262248	1.57685	0.302752	0.262249	1.57685	3330	0
ERS451417_01925	1717.62.peg.1922	NA	NA	NA	0.9959	11	Cbelfantii_FRC0043,"Cdiphtheriae_NCTC11397","Chalotolerans_YIM70093","Chumireducens_DSM45392","Cmaris_DSM45190","Cpseudotuberculosis_31","Cpseudotuberculosis_ATCC19410","Csilvaticum_KL0182","Culcerans_NCTC12077","Culcerans_NCTC7910","Cvitaeruminis_DSM20294"	0.238795	0.238795	2.08637	0.238795	0.238795	2.08637	2050	2	1. 0.46383;2. 351;3. 1051;4. 404;5. 375;6. 1123;7. 399;8. 1195;9. 733;10. I;11. ATC	1. 0.55107;2. 383;3. 1147;4. 436;5. 407;6. 1219;7. 431;8. 1291;9. 829;10. I;11. ATC
ERS451417_01591	1717.62.peg.1600	NA	NA	NA	0.9959	7	Cbelfantii_FRC0043,"Cdiphtheriae_NCTC11397","Cpseudotuberculosis_31","Cpseudotuberculosis_ATCC19410","Csilvaticum_KL0182","Culcerans_NCTC12077","Culcerans_NCTC7910"	0.123337	0.110737	2.26623	0.19501	0.110747	2.26623	258	0
ERS451417_00520	1717.62.peg.524	NA	NA	NA	0.9961	7	Cbelfantii_FRC0043,"Cdiphtheriae_NCTC11397","Cpseudotuberculosis_31","Cpseudotuberculosis_ATCC19410","Csilvaticum_KL0182","Culcerans_NCTC12077","Culcerans_NCTC7910"	0.269432	0.269432	2.92861	0.269432	0.269432	2.92861	2	1	1. 0.50759;2. 1047;3. 3139;4. 1088;5. 1079;6. 3235;7. 1089;8. 3265;9. 3004;10. V;11. GTG
ERS451417_01498	1717.62.peg.1506	NA	NA	NA	0.9961	34	Cargentoratense_DSM44202,"Catypicum_R2070","Caurimucosum_ATCC700975","Cbelfantii_FRC0043","Ccallunae_DSM20147","Ccamporealensis_DSM44610","Cdeserti_GIMN1010","Cdiphtheriae_NCTC11397","Cdoosanense_DSM45436","Cefficiens_YS314","Cepidermidicanis_DSM45586","Cglutamicum_ATCC13032","Cglycinophilum_AJ3170","Chalotolerans_YIM70093","Chumireducens_DSM45392","Cimitans_DSM44264","Cjeikeium_K41","Ckutscheri_…	0.511538	0.202022	1.74695	0.31475	0.202022	1.74695	1282	0
ERS451417_01340	1717.62.peg.1348	NA	NA	NA	0.9963	38	Cargentoratense_DSM44202,"Catypicum_R2070","Caurimucosum_ATCC700975","Cbelfantii_FRC0043","Ccallunae_DSM20147","Ccamporealensis_DSM44610","Cdeserti_GIMN1010","Cdiphtheriae_NCTC11397","Cdoosanense_DSM45436","Cefficiens_YS314","Cepidermidicanis_DSM45586","Cfalsenii_DSM44353","Cglutamicum_ATCC13032","Cglycinophilum_AJ3170","Chalotolerans_YIM70093","Chumireducens_DSM45392","Cimitans_DSM44264","Cjeike…	0.156767	0.0941664	1.74858	0.157157	0.094185	1.74882	2	1	1. 0.73466;2. 80;3. 238;4. 80;5. 80;6. 238;7. 80;8. 238;9. 235;10. Y;11. TAC
ERS451417_02398	1717.62.peg.2430	NA	NA	NA	0.9964	38	Cargentoratense_DSM44202,"Catypicum_R2070","Caurimucosum_ATCC700975","Cbelfantii_FRC0043","Ccallunae_DSM20147","Ccamporealensis_DSM44610","Cdeserti_GIMN1010","Cdiphtheriae_NCTC11397","Cdoosanense_DSM45436","Cefficiens_YS314","Cepidermidicanis_DSM45586","Cfalsenii_DSM44353","Cglutamicum_ATCC13032","Cglycinophilum_AJ3170","Chalotolerans_YIM70093","Chumireducens_DSM45392","Cimitans_DSM44264","Cjeike…	0.202853	0.202853	1.62287	0.202853	0.202853	1.62287	258	0
ERS451417_02356	1717.62.peg.2384	NA	NA	NA	0.9964	9	Cbelfantii_FRC0043,"Cdiphtheriae_NCTC11397","Ckutscheri_DSM20755","Cpseudotuberculosis_31","Cpseudotuberculosis_ATCC19410","Csilvaticum_KL0182","Culcerans_NCTC12077","Culcerans_NCTC7910","Cvitaeruminis_DSM20294"	0.0853589	0.0853589	2.86553	0.0853589	0.0853589	2.86553	2	1	1. 0.44222;2. 515;3. 1543;4. 640;5. 550;6. 1648;7. 556;8. 1666;9. 1384;10. W;11. TGG
ERS451417_00136	1717.62.peg.135	NA	NA	NA	0.9964	12	Cbelfantii_FRC0043,"Cdiphtheriae_NCTC11397","Chumireducens_DSM45392","Cmaris_DSM45190","Cmustelae_DSM45274","Cpseudotuberculosis_31","Cpseudotuberculosis_ATCC19410","Crouxii_FRC0190","Culcerans_NCTC12077","Culcerans_NCTC7910","Cuterequi_DSM45634","Cvitaeruminis_DSM20294"	0.12105	0.12105	2.12567	0.12105	0.12105	2.12567	2050	1	1. 0.61631;2. 184;3. 550;4. 213;5. 186;6. 556;7. 191;8. 571;9. 439;10. G;11. GGT
ERS451417_01903	1717.62.peg.1898	NA	NA	NA	0.9966	5	Cbelfantii_FRC0043,"Cdiphtheriae_NCTC11397","Cpseudotuberculosis_31","Cpseudotuberculosis_ATCC19410","Culcerans_NCTC7910"	0.227284	0.227284	4.20152	0.227284	0.227284	4.20148	4098	2	1. 0.5518;2. 41;3. 121;4. 51;5. 41;6. 121;7. 45;8. 133;9. 73;10. K;11. AAA	1. 0.6487;2. 174;3. 520;4. 185;5. 174;6. 520;7. 178;8. 532;9. 457;10. D;11. GAC
ERS451417_00216	1717.62.peg.213	NA	NA	NA	0.9966	23	Catypicum_R2070,"Cbelfantii_FRC0043","Ccallunae_DSM20147","Ccamporealensis_DSM44610","Cdeserti_GIMN1010","Cdiphtheriae_NCTC11397","Cdoosanense_DSM45436","Cglutamicum_ATCC13032","Chumireducens_DSM45392","Cimitans_DSM44264","Ckutscheri_DSM20755","Cmarinum_DSM44953","Cmustelae_DSM45274","Cpseudotuberculosis_31","Cpseudotuberculosis_ATCC19410","CriegeliiPUDD83A45","Crouxii_FRC0190","Csilvaticum_KL018…	0.207813	0.207749	1.33601	0.313623	0.207749	1.33601	258	0
1717.62.peg.244	1717.62.peg.244	NA	NA	NA	0.9968	39	Cargentoratense_DSM44202,"Catypicum_R2070","Caurimucosum_ATCC700975","Cbelfantii_FRC0043","Ccallunae_DSM20147","Ccamporealensis_DSM44610","Cdeserti_GIMN1010","Cdiphtheriae_NCTC11397","Cdoosanense_DSM45436","Cefficiens_YS314","Cepidermidicanis_DSM45586","Cfalsenii_DSM44353","Cglutamicum_ATCC13032","Cglycinophilum_AJ3170","Chalotolerans_YIM70093","Chumireducens_DSM45392","Cimitans_DSM44264","Cjeike…	0.453482	0.156	1.47382	0.276394	0.156	1.47383	258	0
ERS451417_00401	1717.62.peg.401	NA	NA	NA	0.9968	38	Cargentoratense_DSM44202,"Catypicum_R2070","Caurimucosum_ATCC700975","Cbelfantii_FRC0043","Ccallunae_DSM20147","Ccamporealensis_DSM44610","Cdeserti_GIMN1010","Cdiphtheriae_NCTC11397","Cdoosanense_DSM45436","Cefficiens_YS314","Cepidermidicanis_DSM45586","Cfalsenii_DSM44353","Cglutamicum_ATCC13032","Cglycinophilum_AJ3170","Chalotolerans_YIM70093","Chumireducens_DSM45392","Cimitans_DSM44264","Cjeike…	0.410251	0.109608	1.91682	0.211734	0.109608	1.91682	2306	0
ERS451417_00038	1717.62.peg.34	NA	NA	NA	0.997	31	Cargentoratense_DSM44202,"Caurimucosum_ATCC700975","Cbelfantii_FRC0043","Ccallunae_DSM20147","Cdeserti_GIMN1010","Cdiphtheriae_NCTC11397","Cefficiens_YS314","Cepidermidicanis_DSM45586","Cfalsenii_DSM44353","Cglutamicum_ATCC13032","Cglycinophilum_AJ3170","Chalotolerans_YIM70093","Chumireducens_DSM45392","Cimitans_DSM44264","Cjeikeium_K41","Ckroppenstedtii_DSM44385","Clactis_RW25","Cmarinum_DSM4495…	0.217454	0.189713	2.214	0.217464	0.189713	2.214	1026	3	1. 0.58067;2. 92;3. 274;4. 136;5. 136;6. 406;7. 186;8. 556;9. 220;10. D;11. GAC	1. 0.45591;2. 196;3. 586;4. 241;5. 241;6. 721;7. 291;8. 871;9. 529;10. M;11. ATG	1. 0.69027;2. 217;3. 649;4. 262;5. 262;6. 784;7. 312;8. 934;9. 592;10. T;11. ACC
ERS451417_00123	1717.62.peg.121	NA	NA	NA	0.997	11	Cbelfantii_FRC0043,"Cdiphtheriae_NCTC11397","Chumireducens_DSM45392","Cmarinum_DSM44953","Cpseudotuberculosis_31","Cpseudotuberculosis_ATCC19410","Crouxii_FRC0190","Csilvaticum_KL0182","Ctestudinoris_DSM44614","Culcerans_NCTC12077","Culcerans_NCTC7910"	0.127266	0.127266	1.96691	0.127265	0.127265	1.96691	2306	0
ERS451417_00370	1717.62.peg.369	NA	NA	NA	0.997	39	Cargentoratense_DSM44202,"Catypicum_R2070","Caurimucosum_ATCC700975","Cbelfantii_FRC0043","Ccallunae_DSM20147","Ccamporealensis_DSM44610","Cdeserti_GIMN1010","Cdiphtheriae_NCTC11397","Cdoosanense_DSM45436","Cefficiens_YS314","Cepidermidicanis_DSM45586","Cfalsenii_DSM44353","Cglutamicum_ATCC13032","Cglycinophilum_AJ3170","Chalotolerans_YIM70093","Chumireducens_DSM45392","Cimitans_DSM44264","Cjeike…	0.103904	0.103904	2.02422	0.103904	0.103904	2.02422	258	0
ERS451417_00480	1717.62.peg.483	NA	NA	NA	0.9972	39	Cargentoratense_DSM44202,"Catypicum_R2070","Caurimucosum_ATCC700975","Cbelfantii_FRC0043","Ccallunae_DSM20147","Ccamporealensis_DSM44610","Cdeserti_GIMN1010","Cdiphtheriae_NCTC11397","Cdoosanense_DSM45436","Cefficiens_YS314","Cepidermidicanis_DSM45586","Cfalsenii_DSM44353","Cglutamicum_ATCC13032","Cglycinophilum_AJ3170","Chalotolerans_YIM70093","Chumireducens_DSM45392","Cimitans_DSM44264","Cjeike…	0.236305	0.157506	2.21941	0.286809	0.157516	2.21941	258	0
ERS451417_01654	1717.62.peg.1661	NA	NA	NA	0.9972	38	Cargentoratense_DSM44202,"Catypicum_R2070","Caurimucosum_ATCC700975","Cbelfantii_FRC0043","Ccallunae_DSM20147","Ccamporealensis_DSM44610","Cdeserti_GIMN1010","Cdiphtheriae_NCTC11397","Cdoosanense_DSM45436","Cefficiens_YS314","Cepidermidicanis_DSM45586","Cfalsenii_DSM44353","Cglutamicum_ATCC13032","Cglycinophilum_AJ3170","Chalotolerans_YIM70093","Chumireducens_DSM45392","Cimitans_DSM44264","Cjeike…	0.137604	0.137604	1.73597	0.137604	0.137604	1.73596	258	0
ERS451417_01599	1717.62.peg.1608	NA	NA	NA	0.9975	27	Catypicum_R2070,"Cbelfantii_FRC0043","Ccallunae_DSM20147","Ccamporealensis_DSM44610","Cdeserti_GIMN1010","Cdiphtheriae_NCTC11397","Cdoosanense_DSM45436","Cefficiens_YS314","Cepidermidicanis_DSM45586","Cglutamicum_ATCC13032","Chalotolerans_YIM70093","Chumireducens_DSM45392","Cimitans_DSM44264","Ckutscheri_DSM20755","Cmarinum_DSM44953","Cpseudotuberculosis_31","Cpseudotuberculosis_ATCC19410","Crieg…	0.811333	0.396796	1.80413	0.526563	0.396805	1.80413	3330	0
ERS451417_01226	1717.62.peg.1234	NA	NA	NA	0.9975	39	Cargentoratense_DSM44202,"Catypicum_R2070","Caurimucosum_ATCC700975","Cbelfantii_FRC0043","Ccallunae_DSM20147","Ccamporealensis_DSM44610","Cdeserti_GIMN1010","Cdiphtheriae_NCTC11397","Cdoosanense_DSM45436","Cefficiens_YS314","Cepidermidicanis_DSM45586","Cfalsenii_DSM44353","Cglutamicum_ATCC13032","Cglycinophilum_AJ3170","Chalotolerans_YIM70093","Chumireducens_DSM45392","Cimitans_DSM44264","Cjeike…	0.385962	0.152826	2.06803	0.274931	0.152816	2.06803	2306	0
ERS451417_01948	1717.62.peg.1948	NA	NA	NA	0.9975	38	Cargentoratense_DSM44202,"Catypicum_R2070","Caurimucosum_ATCC700975","Cbelfantii_FRC0043","Ccallunae_DSM20147","Ccamporealensis_DSM44610","Cdeserti_GIMN1010","Cdiphtheriae_NCTC11397","Cdoosanense_DSM45436","Cefficiens_YS314","Cepidermidicanis_DSM45586","Cfalsenii_DSM44353","Cglutamicum_ATCC13032","Cglycinophilum_AJ3170","Chalotolerans_YIM70093","Chumireducens_DSM45392","Cimitans_DSM44264","Cjeike…	0.149578	0.149578	1.57413	0.149578	0.149578	1.57413	3330	0
ERS451417_00097	1717.62.peg.95	NA	NA	NA	0.9975	31	Catypicum_R2070,"Caurimucosum_ATCC700975","Cbelfantii_FRC0043","Ccallunae_DSM20147","Ccamporealensis_DSM44610","Cdeserti_GIMN1010","Cdiphtheriae_NCTC11397","Cdoosanense_DSM45436","Cefficiens_YS314","Cepidermidicanis_DSM45586","Cglutamicum_ATCC13032","Chalotolerans_YIM70093","Chumireducens_DSM45392","Cimitans_DSM44264","Ckutscheri_DSM20755","Cmarinum_DSM44953","Cmaris_DSM45190","Cmustelae_DSM45274…	0.143541	0.143541	1.40658	0.143541	0.143541	1.40658	2306	0
ERS451417_01825	1717.62.peg.1830	NA	NA	NA	0.9975	17	Cbelfantii_FRC0043,"Ccallunae_DSM20147","Cdeserti_GIMN1010","Cdiphtheriae_NCTC11397","Cdoosanense_DSM45436","Cepidermidicanis_DSM45586","Cglutamicum_ATCC13032","Ckutscheri_DSM20755","Clactis_RW25","Cpseudotuberculosis_31","Cpseudotuberculosis_ATCC19410","Csilvaticum_KL0182","Csimulans_PES1","Culcerans_NCTC12077","Culcerans_NCTC7910","Cuterequi_DSM45634","Cvitaeruminis_DSM20294"	0.155859	0.155859	1.96353	0.155859	0.155859	1.96353	258	0
ERS451417_02405	1717.62.peg.2437	NA	NA	NA	0.9977	33	Cargentoratense_DSM44202,"Catypicum_R2070","Caurimucosum_ATCC700975","Cbelfantii_FRC0043","Ccallunae_DSM20147","Ccamporealensis_DSM44610","Cdeserti_GIMN1010","Cdiphtheriae_NCTC11397","Cdoosanense_DSM45436","Cefficiens_YS314","Cepidermidicanis_DSM45586","Cfalsenii_DSM44353","Cglutamicum_ATCC13032","Cimitans_DSM44264","Cjeikeium_K41","Ckroppenstedtii_DSM44385","Ckutscheri_DSM20755","Clactis_RW25","…	0.679985	0.249322	2.12097	0.387755	0.249312	2.12097	258	0
ERS451417_01047	1717.62.peg.1057	NA	NA	NA	0.9977	22	Cbelfantii_FRC0043,"Ccallunae_DSM20147","Ccamporealensis_DSM44610","Cdeserti_GIMN1010","Cdiphtheriae_NCTC11397","Cefficiens_YS314","Cepidermidicanis_DSM45586","Chalotolerans_YIM70093","Chumireducens_DSM45392","Cimitans_DSM44264","Cmarinum_DSM44953","Cmaris_DSM45190","Cmustelae_DSM45274","Cpseudotuberculosis_31","Cpseudotuberculosis_ATCC19410","Crouxii_FRC0190","Csilvaticum_KL0182","Csingulare_IBS…	0.33177	0.33177	1.67116	0.331769	0.331769	1.67116	7426	0
ERS451417_01893	1717.62.peg.1892	NA	NA	NA	0.9977	38	Cargentoratense_DSM44202,"Catypicum_R2070","Caurimucosum_ATCC700975","Cbelfantii_FRC0043","Ccallunae_DSM20147","Ccamporealensis_DSM44610","Cdeserti_GIMN1010","Cdiphtheriae_NCTC11397","Cdoosanense_DSM45436","Cefficiens_YS314","Cepidermidicanis_DSM45586","Cfalsenii_DSM44353","Cglutamicum_ATCC13032","Cglycinophilum_AJ3170","Chalotolerans_YIM70093","Chumireducens_DSM45392","Cimitans_DSM44264","Cjeike…	0.100403	0.100403	2.22323	0.100403	0.100403	2.22323	2306	0
ERS451417_01274	1717.62.peg.1282	NA	NA	NA	0.9977	17	Cargentoratense_DSM44202,"Cbelfantii_FRC0043","Cdiphtheriae_NCTC11397","Cefficiens_YS314","Cepidermidicanis_DSM45586","Cglutamicum_ATCC13032","Ckroppenstedtii_DSM44385","Ckutscheri_DSM20755","Clactis_RW25","Cmustelae_DSM45274","Cpseudotuberculosis_31","Cpseudotuberculosis_ATCC19410","Crouxii_FRC0190","Csilvaticum_KL0182","Culcerans_NCTC12077","Culcerans_NCTC7910","Cvitaeruminis_DSM20294"	0.236819	0.236819	2.0857	0.236819	0.236819	2.0857	2306	0
ERS451417_02019	1717.62.peg.2024	NA	NA	NA	0.9977	38	Cargentoratense_DSM44202,"Catypicum_R2070","Caurimucosum_ATCC700975","Cbelfantii_FRC0043","Ccallunae_DSM20147","Ccamporealensis_DSM44610","Cdeserti_GIMN1010","Cdiphtheriae_NCTC11397","Cdoosanense_DSM45436","Cefficiens_YS314","Cepidermidicanis_DSM45586","Cfalsenii_DSM44353","Cglutamicum_ATCC13032","Cglycinophilum_AJ3170","Chalotolerans_YIM70093","Chumireducens_DSM45392","Cimitans_DSM44264","Cjeike…	0.428491	0.153118	1.88193	0.2607	0.153108	1.88193	258	0
ERS451417_00746	1717.62.peg.749	NA	NA	NA	0.9977	39	Cargentoratense_DSM44202,"Catypicum_R2070","Caurimucosum_ATCC700975","Cbelfantii_FRC0043","Ccallunae_DSM20147","Ccamporealensis_DSM44610","Cdeserti_GIMN1010","Cdiphtheriae_NCTC11397","Cdoosanense_DSM45436","Cefficiens_YS314","Cepidermidicanis_DSM45586","Cfalsenii_DSM44353","Cglutamicum_ATCC13032","Cglycinophilum_AJ3170","Chalotolerans_YIM70093","Chumireducens_DSM45392","Cimitans_DSM44264","Cjeike…	0.199647	0.199647	1.67238	0.199647	0.199647	1.67237	258	0
ERS451417_02065	1717.62.peg.2077	NA	NA	NA	0.9977	7	Cbelfantii_FRC0043,"Cdiphtheriae_NCTC11397","Cpseudotuberculosis_31","Cpseudotuberculosis_ATCC19410","Csilvaticum_KL0182","Culcerans_NCTC12077","Culcerans_NCTC7910"	0.13086	0.118868	2.20552	0.252071	0.118868	2.20552	258	0
ERS451417_02315	1717.62.peg.2342	NA	NA	NA	0.9977	38	Cargentoratense_DSM44202,"Catypicum_R2070","Caurimucosum_ATCC700975","Cbelfantii_FRC0043","Ccallunae_DSM20147","Ccamporealensis_DSM44610","Cdeserti_GIMN1010","Cdiphtheriae_NCTC11397","Cdoosanense_DSM45436","Cefficiens_YS314","Cepidermidicanis_DSM45586","Cfalsenii_DSM44353","Cglutamicum_ATCC13032","Cglycinophilum_AJ3170","Chalotolerans_YIM70093","Chumireducens_DSM45392","Cimitans_DSM44264","Cjeike…	0.715507	0.260943	1.86711	0.373694	0.260942	1.86711	258	0
ERS451417_01962	1717.62.peg.1962	NA	NA	NA	0.998	16	Catypicum_R2070,"Caurimucosum_ATCC700975","Cbelfantii_FRC0043","Ccallunae_DSM20147","Cdeserti_GIMN1010","Cdiphtheriae_NCTC11397","Cefficiens_YS314","Cglutamicum_ATCC13032","Cglycinophilum_AJ3170","Ckutscheri_DSM20755","Cpseudotuberculosis_31","Cpseudotuberculosis_ATCC19410","Csingulare_IBSB52218","Culcerans_NCTC12077","Culcerans_NCTC7910","Cvitaeruminis_DSM20294"	0.124171	0.124171	2.54926	0.124171	0.124171	2.54928	2306	0
ERS451417_01990	1717.62.peg.1991	NA	NA	NA	0.998	7	Cbelfantii_FRC0043,"Cdiphtheriae_NCTC11397","Cpseudotuberculosis_ATCC19410","Csilvaticum_KL0182","Culcerans_NCTC12077","Culcerans_NCTC7910","Cvitaeruminis_DSM20294"	0.24758	0.24758	3.145	0.24758	0.24758	3.14501	2	1	1. 0.58187;2. 110;3. 328;4. 186;5. 150;6. 448;7. 150;8. 448;9. 268;10. N;11. AAT
ERS451417_01744	1717.62.peg.1747	NA	NA	NA	0.998	7	Cbelfantii_FRC0043,"Cdiphtheriae_NCTC11397","Cpseudotuberculosis_31","Cpseudotuberculosis_ATCC19410","Csilvaticum_KL0182","Culcerans_NCTC12077","Culcerans_NCTC7910"	1.79508	0.245068	3.57709	0.37685	0.245058	3.57708	256	0
ERS451417_01833	1717.62.peg.1836	NA	NA	NA	0.998	8	Cbelfantii_FRC0043,"Cdiphtheriae_NCTC11397","Ckutscheri_DSM20755","Cpseudotuberculosis_31","Cpseudotuberculosis_ATCC19410","Csilvaticum_KL0182","Culcerans_NCTC12077","Culcerans_NCTC7910"	0.112696	0.112696	2.38381	0.112696	0.112696	2.38387	258	0
ERS451417_00404	1717.62.peg.404	NA	NA	NA	0.998	39	Cargentoratense_DSM44202,"Catypicum_R2070","Caurimucosum_ATCC700975","Cbelfantii_FRC0043","Ccallunae_DSM20147","Ccamporealensis_DSM44610","Cdeserti_GIMN1010","Cdiphtheriae_NCTC11397","Cdoosanense_DSM45436","Cefficiens_YS314","Cepidermidicanis_DSM45586","Cfalsenii_DSM44353","Cglutamicum_ATCC13032","Cglycinophilum_AJ3170","Chalotolerans_YIM70093","Chumireducens_DSM45392","Cimitans_DSM44264","Cjeike…	0.632091	0.254509	2.34406	0.390532	0.254509	2.34406	258	0
ERS451417_01939	1717.62.peg.1936	NA	NA	NA	0.998	38	Cargentoratense_DSM44202,"Catypicum_R2070","Caurimucosum_ATCC700975","Cbelfantii_FRC0043","Ccallunae_DSM20147","Ccamporealensis_DSM44610","Cdeserti_GIMN1010","Cdiphtheriae_NCTC11397","Cdoosanense_DSM45436","Cefficiens_YS314","Cepidermidicanis_DSM45586","Cfalsenii_DSM44353","Cglutamicum_ATCC13032","Cglycinophilum_AJ3170","Chalotolerans_YIM70093","Chumireducens_DSM45392","Cimitans_DSM44264","Cjeike…	0.118956	0.118956	1.9646	0.118956	0.118956	1.9646	258	0
ERS451417_00303	1717.62.peg.304	NA	NA	NA	0.9984	22	Catypicum_R2070,"Caurimucosum_ATCC700975","Cbelfantii_FRC0043","Ccamporealensis_DSM44610","Cdiphtheriae_NCTC11397","Cepidermidicanis_DSM45586","Chumireducens_DSM45392","Cimitans_DSM44264","Cmarinum_DSM44953","Cmustelae_DSM45274","Cpseudotuberculosis_31","Cpseudotuberculosis_ATCC19410","CriegeliiPUDD83A45","Crouxii_FRC0190","Csilvaticum_KL0182","Csimulans_PES1","Csingulare_IBSB52218","Ctestudinori…	0.504243	0.134565	1.09414	0.251612	0.134555	1.09414	258	0
ERS451417_01851	1717.62.peg.1853	NA	NA	NA	0.9984	38	Cargentoratense_DSM44202,"Catypicum_R2070","Caurimucosum_ATCC700975","Cbelfantii_FRC0043","Ccallunae_DSM20147","Ccamporealensis_DSM44610","Cdeserti_GIMN1010","Cdiphtheriae_NCTC11397","Cdoosanense_DSM45436","Cefficiens_YS314","Cepidermidicanis_DSM45586","Cfalsenii_DSM44353","Cglutamicum_ATCC13032","Cglycinophilum_AJ3170","Chalotolerans_YIM70093","Chumireducens_DSM45392","Cimitans_DSM44264","Cjeike…	0.16089	0.16089	1.77805	0.16089	0.16089	1.77805	2	1	1. 0.46173;2. 234;3. 700;4. 267;5. 267;6. 799;7. 306;8. 916;9. 658;10. A;11. GCA
ERS451417_01203	1717.62.peg.1211	NA	NA	NA	0.9984	39	Cargentoratense_DSM44202,"Catypicum_R2070","Caurimucosum_ATCC700975","Cbelfantii_FRC0043","Ccallunae_DSM20147","Ccamporealensis_DSM44610","Cdeserti_GIMN1010","Cdiphtheriae_NCTC11397","Cdoosanense_DSM45436","Cefficiens_YS314","Cepidermidicanis_DSM45586","Cfalsenii_DSM44353","Cglutamicum_ATCC13032","Cglycinophilum_AJ3170","Chalotolerans_YIM70093","Chumireducens_DSM45392","Cimitans_DSM44264","Cjeike…	0.156222	0.156222	1.9898	0.156222	0.156222	1.98981	2306	0
ERS451417_02128	1717.62.peg.2146	NA	NA	NA	0.9984	38	Cargentoratense_DSM44202,"Catypicum_R2070","Caurimucosum_ATCC700975","Cbelfantii_FRC0043","Ccallunae_DSM20147","Ccamporealensis_DSM44610","Cdeserti_GIMN1010","Cdiphtheriae_NCTC11397","Cdoosanense_DSM45436","Cefficiens_YS314","Cepidermidicanis_DSM45586","Cfalsenii_DSM44353","Cglutamicum_ATCC13032","Cglycinophilum_AJ3170","Chalotolerans_YIM70093","Chumireducens_DSM45392","Cimitans_DSM44264","Cjeike…	0.119836	0.119836	1.88453	0.119836	0.119836	1.88453	258	0
ERS451417_01683	1717.62.peg.1690	NA	NA	NA	0.9984	31	Caurimucosum_ATCC700975,"Cbelfantii_FRC0043","Ccallunae_DSM20147","Cdeserti_GIMN1010","Cdiphtheriae_NCTC11397","Cdoosanense_DSM45436","Cefficiens_YS314","Cepidermidicanis_DSM45586","Cfalsenii_DSM44353","Cglycinophilum_AJ3170","Chalotolerans_YIM70093","Cimitans_DSM44264","Cjeikeium_K41","Ckroppenstedtii_DSM44385","Ckutscheri_DSM20755","Clactis_RW25","Cmarinum_DSM44953","Cmaris_DSM45190","Cmustelae…	0.540638	0.265526	1.23806	0.395196	0.265516	1.23806	3330	0
ERS451417_00231	1717.62.peg.227	NA	NA	NA	0.9984	39	Cargentoratense_DSM44202,"Catypicum_R2070","Caurimucosum_ATCC700975","Cbelfantii_FRC0043","Ccallunae_DSM20147","Ccamporealensis_DSM44610","Cdeserti_GIMN1010","Cdiphtheriae_NCTC11397","Cdoosanense_DSM45436","Cefficiens_YS314","Cepidermidicanis_DSM45586","Cfalsenii_DSM44353","Cglutamicum_ATCC13032","Cglycinophilum_AJ3170","Chalotolerans_YIM70093","Chumireducens_DSM45392","Cimitans_DSM44264","Cjeike…	0.089889	0.089889	2.10485	0.089889	0.089889	2.10486	258	0
ERS451417_02178	1717.62.peg.2204	NA	NA	NA	0.9984	14	Cargentoratense_DSM44202,"Ccamporealensis_DSM44610","Cdeserti_GIMN1010","Cdiphtheriae_NCTC11397","Cefficiens_YS314","Cglutamicum_ATCC13032","Cimitans_DSM44264","Ckutscheri_DSM20755","Clactis_RW25","Cmarinum_DSM44953","Cmaris_DSM45190","Cpseudotuberculosis_31","Csingulare_IBSB52218","Culcerans_NCTC7910"	0.18107	0.18107	1.76966	0.18107	0.18107	1.76966	6146	2	1. 0.82001;2. 263;3. 787;4. 327;5. 307;6. 919;7. 324;8. 970;9. 589;10. Y;11. TAT	1. 0.49203;2. 332;3. 994;4. 399;5. 379;6. 1135;7. 398;8. 1192;9. 751;10. R;11. CGT
ERS451417_00306	1717.62.peg.307	NA	NA	NA	0.9984	36	Cargentoratense_DSM44202,"Catypicum_R2070","Caurimucosum_ATCC700975","Cbelfantii_FRC0043","Ccallunae_DSM20147","Ccamporealensis_DSM44610","Cdeserti_GIMN1010","Cdiphtheriae_NCTC11397","Cdoosanense_DSM45436","Cefficiens_YS314","Cepidermidicanis_DSM45586","Cfalsenii_DSM44353","Cglutamicum_ATCC13032","Cglycinophilum_AJ3170","Chalotolerans_YIM70093","Chumireducens_DSM45392","Cimitans_DSM44264","Cjeike…	0.160282	0.160273	1.3453	0.164457	0.160273	1.3453	2306	0
ERS451417_01249	1717.62.peg.1257	NA	NA	NA	0.9984	39	Cargentoratense_DSM44202,"Catypicum_R2070","Caurimucosum_ATCC700975","Cbelfantii_FRC0043","Ccallunae_DSM20147","Ccamporealensis_DSM44610","Cdeserti_GIMN1010","Cdiphtheriae_NCTC11397","Cdoosanense_DSM45436","Cefficiens_YS314","Cepidermidicanis_DSM45586","Cfalsenii_DSM44353","Cglutamicum_ATCC13032","Cglycinophilum_AJ3170","Chalotolerans_YIM70093","Chumireducens_DSM45392","Cimitans_DSM44264","Cjeike…	0.13802	0.13802	1.78102	0.13802	0.13802	1.78102	2	1	1. 0.59454;2. 164;3. 490;4. 164;5. 164;6. 490;7. 164;8. 490;9. 478;10. D;11. GAT
ERS451417_02258	1717.62.peg.2287	NA	NA	NA	0.9984	14	Caurimucosum_ATCC700975,"Cbelfantii_FRC0043","Ccamporealensis_DSM44610","Cdiphtheriae_NCTC11397","Ckroppenstedtii_DSM44385","Clactis_RW25","Cpseudotuberculosis_31","Cpseudotuberculosis_ATCC19410","Csilvaticum_KL0182","Csimulans_PES1","Csingulare_IBSB52218","Culcerans_NCTC12077","Culcerans_NCTC7910","Cuterequi_DSM45634"	0.127216	0.127216	1.94462	0.127216	0.127216	1.94462	258	0
ERS451417_01607	1717.62.peg.1616	NA	NA	NA	0.9984	5	Cbelfantii_FRC0043,"Cdiphtheriae_NCTC11397","Cpseudotuberculosis_ATCC19410","Culcerans_NCTC12077","Culcerans_NCTC7910"	0.25914	0.25914	3.00101	0.262143	0.25914	3.001	258	0
ERS451417_02051	1717.62.peg.2062	NA	NA	NA	0.9989	37	Cargentoratense_DSM44202,"Catypicum_R2070","Caurimucosum_ATCC700975","Cbelfantii_FRC0043","Ccallunae_DSM20147","Ccamporealensis_DSM44610","Cdeserti_GIMN1010","Cdiphtheriae_NCTC11397","Cdoosanense_DSM45436","Cefficiens_YS314","Cepidermidicanis_DSM45586","Cfalsenii_DSM44353","Cglutamicum_ATCC13032","Cglycinophilum_AJ3170","Chalotolerans_YIM70093","Chumireducens_DSM45392","Cimitans_DSM44264","Cjeike…	0.158649	0.158649	1.72794	0.158649	0.158649	1.72794	1282	0
ERS451417_00282	1717.62.peg.283	NA	NA	NA	0.9989	24	Caurimucosum_ATCC700975,"Cbelfantii_FRC0043","Ccamporealensis_DSM44610","Cdiphtheriae_NCTC11397","Cdoosanense_DSM45436","Cfalsenii_DSM44353","Chalotolerans_YIM70093","Chumireducens_DSM45392","Cimitans_DSM44264","Cmarinum_DSM44953","Cmaris_DSM45190","Cmustelae_DSM45274","Cpseudotuberculosis_31","Cpseudotuberculosis_ATCC19410","CriegeliiPUDD83A45","Csilvaticum_KL0182","Csimulans_PES1","Csingulare_I…	0.157683	0.157683	1.63814	0.157683	0.157683	1.63814	3074	2	1. 0.52615;2. 63;3. 187;4. 82;5. 80;6. 238;7. 154;8. 460;9. 58;10. N;11. AAC	1. 0.43005;2. 319;3. 955;4. 366;5. 354;6. 1060;7. 507;8. 1519;9. 634;10. E;11. GAA
ERS451417_01602	1717.62.peg.1611	NA	NA	NA	0.9989	38	Cargentoratense_DSM44202,"Catypicum_R2070","Caurimucosum_ATCC700975","Cbelfantii_FRC0043","Ccallunae_DSM20147","Ccamporealensis_DSM44610","Cdeserti_GIMN1010","Cdiphtheriae_NCTC11397","Cdoosanense_DSM45436","Cefficiens_YS314","Cepidermidicanis_DSM45586","Cfalsenii_DSM44353","Cglutamicum_ATCC13032","Cglycinophilum_AJ3170","Chalotolerans_YIM70093","Chumireducens_DSM45392","Cimitans_DSM44264","Cjeike…	0.100917	0.100917	1.59035	0.100927	0.100927	1.59036	258	0
ERS451417_01420	1717.62.peg.1426	NA	NA	NA	0.9989	36	Cargentoratense_DSM44202,"Catypicum_R2070","Caurimucosum_ATCC700975","Cbelfantii_FRC0043","Ccallunae_DSM20147","Ccamporealensis_DSM44610","Cdeserti_GIMN1010","Cdiphtheriae_NCTC11397","Cdoosanense_DSM45436","Cefficiens_YS314","Cepidermidicanis_DSM45586","Cfalsenii_DSM44353","Cglutamicum_ATCC13032","Cglycinophilum_AJ3170","Chalotolerans_YIM70093","Chumireducens_DSM45392","Cimitans_DSM44264","Cjeike…	0.157748	0.157748	1.68559	0.157748	0.157748	1.68559	3074	1	1. 0.48906;2. 402;3. 1204;4. 428;5. 428;6. 1282;7. 446;8. 1336;9. 913;10. L;11. CTC
ERS451417_00199	1717.62.peg.196	NA	NA	NA	0.9989	39	Cargentoratense_DSM44202,"Catypicum_R2070","Caurimucosum_ATCC700975","Cbelfantii_FRC0043","Ccallunae_DSM20147","Ccamporealensis_DSM44610","Cdeserti_GIMN1010","Cdiphtheriae_NCTC11397","Cdoosanense_DSM45436","Cefficiens_YS314","Cepidermidicanis_DSM45586","Cfalsenii_DSM44353","Cglutamicum_ATCC13032","Cglycinophilum_AJ3170","Chalotolerans_YIM70093","Chumireducens_DSM45392","Cimitans_DSM44264","Cjeike…	0.118854	0.118854	2.06444	0.118854	0.118854	2.06442	258	0
ERS451417_02236	1717.62.peg.2261	NA	NA	NA	0.9989	17	Caurimucosum_ATCC700975,"Cbelfantii_FRC0043","Ccamporealensis_DSM44610","Cdiphtheriae_NCTC11397","Cfalsenii_DSM44353","Cglycinophilum_AJ3170","Chalotolerans_YIM70093","Cjeikeium_K41","Ckroppenstedtii_DSM44385","Clactis_RW25","Cpseudotuberculosis_31","Csilvaticum_KL0182","Csimulans_PES1","Cterpenotabidum_Y11","Culcerans_NCTC12077","Culcerans_NCTC7910","Curealyticum_DSM7109"	0.142503	0.142503	2.13082	0.142503	0.142503	2.13082	1282	0
ERS451417_00713	1717.62.peg.718	NA	NA	NA	0.9989	39	Cargentoratense_DSM44202,"Catypicum_R2070","Caurimucosum_ATCC700975","Cbelfantii_FRC0043","Ccallunae_DSM20147","Ccamporealensis_DSM44610","Cdeserti_GIMN1010","Cdiphtheriae_NCTC11397","Cdoosanense_DSM45436","Cefficiens_YS314","Cepidermidicanis_DSM45586","Cfalsenii_DSM44353","Cglutamicum_ATCC13032","Cglycinophilum_AJ3170","Chalotolerans_YIM70093","Chumireducens_DSM45392","Cimitans_DSM44264","Cjeike…	0.11197	0.11197	1.88591	0.11197	0.11197	1.8859	258	0
ERS451417_01212	1717.62.peg.1220	NA	NA	NA	0.9989	39	Cargentoratense_DSM44202,"Catypicum_R2070","Caurimucosum_ATCC700975","Cbelfantii_FRC0043","Ccallunae_DSM20147","Ccamporealensis_DSM44610","Cdeserti_GIMN1010","Cdiphtheriae_NCTC11397","Cdoosanense_DSM45436","Cefficiens_YS314","Cepidermidicanis_DSM45586","Cfalsenii_DSM44353","Cglutamicum_ATCC13032","Cglycinophilum_AJ3170","Chalotolerans_YIM70093","Chumireducens_DSM45392","Cimitans_DSM44264","Cjeike…	0.141219	0.141219	1.91417	0.141219	0.141219	1.91416	2	1	1. 0.52772;2. 213;3. 637;4. 230;5. 230;6. 688;7. 300;8. 898;9. 616;10. E;11. GAA
ERS451417_01601	1717.62.peg.1610	NA	NA	NA	0.9989	32	Cargentoratense_DSM44202,"Catypicum_R2070","Caurimucosum_ATCC700975","Cbelfantii_FRC0043","Ccallunae_DSM20147","Ccamporealensis_DSM44610","Cdeserti_GIMN1010","Cdiphtheriae_NCTC11397","Cdoosanense_DSM45436","Cefficiens_YS314","Cepidermidicanis_DSM45586","Cglutamicum_ATCC13032","Chalotolerans_YIM70093","Chumireducens_DSM45392","Cimitans_DSM44264","Ckutscheri_DSM20755","Clactis_RW25","Cmarinum_DSM44…	0.174403	0.174403	1.91759	0.174403	0.174403	1.91759	258	0
ERS451417_00783	1717.62.peg.790	NA	NA	NA	0.9989	36	Cargentoratense_DSM44202,"Catypicum_R2070","Caurimucosum_ATCC700975","Cbelfantii_FRC0043","Ccallunae_DSM20147","Ccamporealensis_DSM44610","Cdeserti_GIMN1010","Cdiphtheriae_NCTC11397","Cdoosanense_DSM45436","Cefficiens_YS314","Cepidermidicanis_DSM45586","Cfalsenii_DSM44353","Cglutamicum_ATCC13032","Cglycinophilum_AJ3170","Chalotolerans_YIM70093","Chumireducens_DSM45392","Cimitans_DSM44264","Cjeike…	0.188579	0.188543	1.09089	0.191434	0.188543	1.09089	258	0
ERS451417_01514	1717.62.peg.1522	NA	NA	NA	0.9989	14	Cargentoratense_DSM44202,"Cbelfantii_FRC0043","Cdiphtheriae_NCTC11397","Cepidermidicanis_DSM45586","Ckroppenstedtii_DSM44385","Ckutscheri_DSM20755","Clactis_RW25","Cmustelae_DSM45274","Cpseudotuberculosis_31","Cpseudotuberculosis_ATCC19410","Csilvaticum_KL0182","Culcerans_NCTC12077","Culcerans_NCTC7910","Cvitaeruminis_DSM20294"	0.0948287	0.0948287	1.84273	0.0948287	0.0948287	1.84274	258	0
ERS451417_00099	1717.62.peg.97	NA	NA	NA	0.9989	28	Cargentoratense_DSM44202,"Caurimucosum_ATCC700975","Cbelfantii_FRC0043","Ccallunae_DSM20147","Ccamporealensis_DSM44610","Cdeserti_GIMN1010","Cdiphtheriae_NCTC11397","Cdoosanense_DSM45436","Cefficiens_YS314","Cepidermidicanis_DSM45586","Cglutamicum_ATCC13032","Chalotolerans_YIM70093","Chumireducens_DSM45392","Cimitans_DSM44264","Cmarinum_DSM44953","Cmaris_DSM45190","Cpseudotuberculosis_31","Cpseud…	0.172147	0.172147	1.63296	0.172147	0.172147	1.63296	3074	1	1. 0.45684;2. 69;3. 205;4. 97;5. 87;6. 259;7. 147;8. 439;9. 142;10. I;11. ATT
ERS451417_00818	1717.62.peg.824	NA	NA	NA	0.9989	39	Cargentoratense_DSM44202,"Catypicum_R2070","Caurimucosum_ATCC700975","Cbelfantii_FRC0043","Ccallunae_DSM20147","Ccamporealensis_DSM44610","Cdeserti_GIMN1010","Cdiphtheriae_NCTC11397","Cdoosanense_DSM45436","Cefficiens_YS314","Cepidermidicanis_DSM45586","Cfalsenii_DSM44353","Cglutamicum_ATCC13032","Cglycinophilum_AJ3170","Chalotolerans_YIM70093","Chumireducens_DSM45392","Cimitans_DSM44264","Cjeike…	0.20858	0.20858	1.88025	0.20858	0.20858	1.88025	258	0
ERS451417_00247	1717.62.peg.242	NA	NA	NA	0.9989	8	Caurimucosum_ATCC700975,"Cbelfantii_FRC0043","Cdiphtheriae_NCTC11397","Cdoosanense_DSM45436","Crouxii_FRC0190","Culcerans_NCTC12077","Culcerans_NCTC7910","Cuterequi_DSM45634"	0.443676	0.440519	2.64746	0.455325	0.44052	2.64746	258	0
ERS451417_01167	1717.62.peg.1178	NA	NA	NA	0.9989	39	Cargentoratense_DSM44202,"Catypicum_R2070","Caurimucosum_ATCC700975","Cbelfantii_FRC0043","Ccallunae_DSM20147","Ccamporealensis_DSM44610","Cdeserti_GIMN1010","Cdiphtheriae_NCTC11397","Cdoosanense_DSM45436","Cefficiens_YS314","Cepidermidicanis_DSM45586","Cfalsenii_DSM44353","Cglutamicum_ATCC13032","Cglycinophilum_AJ3170","Chalotolerans_YIM70093","Chumireducens_DSM45392","Cimitans_DSM44264","Cjeike…	0.135246	0.135246	1.8822	0.135246	0.135246	1.8822	2	1	1. 0.63355;2. 427;3. 1279;4. 439;5. 439;6. 1315;7. 478;8. 1432;9. 1264;10. P;11. CCA
ERS451417_01530	1717.62.peg.1539	NA	NA	NA	0.9989	38	Cargentoratense_DSM44202,"Catypicum_R2070","Caurimucosum_ATCC700975","Cbelfantii_FRC0043","Ccallunae_DSM20147","Ccamporealensis_DSM44610","Cdeserti_GIMN1010","Cdiphtheriae_NCTC11397","Cdoosanense_DSM45436","Cefficiens_YS314","Cepidermidicanis_DSM45586","Cfalsenii_DSM44353","Cglutamicum_ATCC13032","Cglycinophilum_AJ3170","Chalotolerans_YIM70093","Chumireducens_DSM45392","Cimitans_DSM44264","Cjeike…	0.140861	0.140861	1.58417	0.140861	0.140861	1.58417	258	0
ERS451417_00504	1717.62.peg.508	NA	NA	NA	0.9989	22	Caurimucosum_ATCC700975,"Cbelfantii_FRC0043","Ccallunae_DSM20147","Cdeserti_GIMN1010","Cdiphtheriae_NCTC11397","Cefficiens_YS314","Cglutamicum_ATCC13032","Chumireducens_DSM45392","Cjeikeium_K41","Ckutscheri_DSM20755","Cmarinum_DSM44953","Cmaris_DSM45190","Cpseudotuberculosis_31","Cpseudotuberculosis_ATCC19410","Crouxii_FRC0190","Csilvaticum_KL0182","Csingulare_IBSB52218","Ctestudinoris_DSM44614",…	0.121931	0.121931	1.95684	0.121931	0.121931	1.95684	2	1	1. 0.64217;2. 204;3. 610;4. 233;5. 233;6. 697;7. 239;8. 715;9. 436;10. I;11. ATC
ERS451417_02064	1717.62.peg.2076	NA	NA	NA	0.9989	7	Cbelfantii_FRC0043,"Cdiphtheriae_NCTC11397","Cpseudotuberculosis_31","Cpseudotuberculosis_ATCC19410","Csilvaticum_KL0182","Culcerans_NCTC12077","Culcerans_NCTC7910"	0.0753623	0.0753623	3.25062	0.0753718	0.0753718	3.25046	2	1	1. 0.40283;2. 373;3. 1117;4. 385;5. 385;6. 1153;7. 386;8. 1156;9. 1108;10. S;11. AGC
ERS451417_00371	1717.62.peg.370	NA	NA	NA	0.9989	39	Cargentoratense_DSM44202,"Catypicum_R2070","Caurimucosum_ATCC700975","Cbelfantii_FRC0043","Ccallunae_DSM20147","Ccamporealensis_DSM44610","Cdeserti_GIMN1010","Cdiphtheriae_NCTC11397","Cdoosanense_DSM45436","Cefficiens_YS314","Cepidermidicanis_DSM45586","Cfalsenii_DSM44353","Cglutamicum_ATCC13032","Cglycinophilum_AJ3170","Chalotolerans_YIM70093","Chumireducens_DSM45392","Cimitans_DSM44264","Cjeike…	0.106818	0.106818	1.86334	0.106818	0.106818	1.86334	2306	0
ERS451417_00095	1717.62.peg.93	NA	NA	NA	0.9989	11	Cbelfantii_FRC0043,"Cdiphtheriae_NCTC11397","Cglutamicum_ATCC13032","Cglycinophilum_AJ3170","Cpseudotuberculosis_31","Cpseudotuberculosis_ATCC19410","Crouxii_FRC0190","Csilvaticum_KL0182","Cterpenotabidum_Y11","Culcerans_NCTC12077","Culcerans_NCTC7910"	0.0745362	0.0745362	1.93962	0.0745362	0.0745362	1.93962	2306	0
ERS451417_00842	1717.62.peg.847	NA	NA	NA	0.9989	39	Cargentoratense_DSM44202,"Catypicum_R2070","Caurimucosum_ATCC700975","Cbelfantii_FRC0043","Ccallunae_DSM20147","Ccamporealensis_DSM44610","Cdeserti_GIMN1010","Cdiphtheriae_NCTC11397","Cdoosanense_DSM45436","Cefficiens_YS314","Cepidermidicanis_DSM45586","Cfalsenii_DSM44353","Cglutamicum_ATCC13032","Cglycinophilum_AJ3170","Chalotolerans_YIM70093","Chumireducens_DSM45392","Cimitans_DSM44264","Cjeike…	0.105136	0.105136	1.80759	0.105136	0.105136	1.80759	2	2	1. 0.5999;2. 442;3. 1324;4. 445;5. 445;6. 1333;7. 445;8. 1333;9. 1309;10. D;11. GAT	1. 0.45867;2. 444;3. 1330;4. 447;5. 447;6. 1339;7. 447;8. 1339;9. 1312;10. E;11. GAA
ERS451417_00863	1717.62.peg.868	NA	NA	NA	0.9989	33	Cargentoratense_DSM44202,"Catypicum_R2070","Caurimucosum_ATCC700975","Cbelfantii_FRC0043","Ccallunae_DSM20147","Ccamporealensis_DSM44610","Cdeserti_GIMN1010","Cdiphtheriae_NCTC11397","Cdoosanense_DSM45436","Cefficiens_YS314","Cepidermidicanis_DSM45586","Cfalsenii_DSM44353","Cglutamicum_ATCC13032","Cglycinophilum_AJ3170","Chumireducens_DSM45392","Cimitans_DSM44264","Ckroppenstedtii_DSM44385","Ckut…	0.155654	0.155654	2.16708	0.155654	0.155654	2.16708	3330	0
ERS451417_00294	1717.62.peg.295	NA	NA	NA	0.9989	39	Cargentoratense_DSM44202,"Catypicum_R2070","Caurimucosum_ATCC700975","Cbelfantii_FRC0043","Ccallunae_DSM20147","Ccamporealensis_DSM44610","Cdeserti_GIMN1010","Cdiphtheriae_NCTC11397","Cdoosanense_DSM45436","Cefficiens_YS314","Cepidermidicanis_DSM45586","Cfalsenii_DSM44353","Cglutamicum_ATCC13032","Cglycinophilum_AJ3170","Chalotolerans_YIM70093","Chumireducens_DSM45392","Cimitans_DSM44264","Cjeike…	0.13933	0.13933	1.67233	0.13933	0.13933	1.67232	258	0
ERS451417_00351	1717.62.peg.354	NA	NA	NA	0.9989	39	Cargentoratense_DSM44202,"Catypicum_R2070","Caurimucosum_ATCC700975","Cbelfantii_FRC0043","Ccallunae_DSM20147","Ccamporealensis_DSM44610","Cdeserti_GIMN1010","Cdiphtheriae_NCTC11397","Cdoosanense_DSM45436","Cefficiens_YS314","Cepidermidicanis_DSM45586","Cfalsenii_DSM44353","Cglutamicum_ATCC13032","Cglycinophilum_AJ3170","Chalotolerans_YIM70093","Chumireducens_DSM45392","Cimitans_DSM44264","Cjeike…	0.250681	0.250681	1.77222	0.250681	0.250681	1.77222	1026	1	1. 0.42937;2. 289;3. 865;4. 336;5. 336;6. 1006;7. 488;8. 1462;9. 733;10. E;11. GAA
ERS451417_01310	1717.62.peg.1318	NA	NA	NA	0.9989	38	Cargentoratense_DSM44202,"Catypicum_R2070","Caurimucosum_ATCC700975","Cbelfantii_FRC0043","Ccallunae_DSM20147","Ccamporealensis_DSM44610","Cdeserti_GIMN1010","Cdiphtheriae_NCTC11397","Cdoosanense_DSM45436","Cefficiens_YS314","Cepidermidicanis_DSM45586","Cfalsenii_DSM44353","Cglutamicum_ATCC13032","Cglycinophilum_AJ3170","Chalotolerans_YIM70093","Chumireducens_DSM45392","Cimitans_DSM44264","Cjeike…	0.159422	0.159422	1.52248	0.159422	0.159422	1.52248	258	0
ERS451417_01141	1717.62.peg.1152	NA	NA	NA	0.9989	39	Cargentoratense_DSM44202,"Catypicum_R2070","Caurimucosum_ATCC700975","Cbelfantii_FRC0043","Ccallunae_DSM20147","Ccamporealensis_DSM44610","Cdeserti_GIMN1010","Cdiphtheriae_NCTC11397","Cdoosanense_DSM45436","Cefficiens_YS314","Cepidermidicanis_DSM45586","Cfalsenii_DSM44353","Cglutamicum_ATCC13032","Cglycinophilum_AJ3170","Chalotolerans_YIM70093","Chumireducens_DSM45392","Cimitans_DSM44264","Cjeike…	0.0818391	0.0818391	2.01277	0.0818391	0.0818391	2.01274	258	0
ERS451417_00358	1717.62.peg.357	NA	NA	NA	0.9989	39	Cargentoratense_DSM44202,"Catypicum_R2070","Caurimucosum_ATCC700975","Cbelfantii_FRC0043","Ccallunae_DSM20147","Ccamporealensis_DSM44610","Cdeserti_GIMN1010","Cdiphtheriae_NCTC11397","Cdoosanense_DSM45436","Cefficiens_YS314","Cepidermidicanis_DSM45586","Cfalsenii_DSM44353","Cglutamicum_ATCC13032","Cglycinophilum_AJ3170","Chalotolerans_YIM70093","Chumireducens_DSM45392","Cimitans_DSM44264","Cjeike…	0.49892	0.185403	1.87576	0.315378	0.185403	1.87576	258	0
ERS451417_00002	1717.62.peg.3	NA	NA	NA	0.9989	39	Cargentoratense_DSM44202,"Catypicum_R2070","Caurimucosum_ATCC700975","Cbelfantii_FRC0043","Ccallunae_DSM20147","Ccamporealensis_DSM44610","Cdeserti_GIMN1010","Cdiphtheriae_NCTC11397","Cdoosanense_DSM45436","Cefficiens_YS314","Cepidermidicanis_DSM45586","Cfalsenii_DSM44353","Cglutamicum_ATCC13032","Cglycinophilum_AJ3170","Chalotolerans_YIM70093","Chumireducens_DSM45392","Cimitans_DSM44264","Cjeike…	0.185217	0.185217	1.76896	0.185217	0.185217	1.76896	2306	0
ERS451417_01739	1717.62.peg.1743	NA	NA	NA	0.9989	31	Cargentoratense_DSM44202,"Catypicum_R2070","Caurimucosum_ATCC700975","Cbelfantii_FRC0043","Ccallunae_DSM20147","Ccamporealensis_DSM44610","Cdeserti_GIMN1010","Cdiphtheriae_NCTC11397","Cdoosanense_DSM45436","Cefficiens_YS314","Cepidermidicanis_DSM45586","Cglutamicum_ATCC13032","Chalotolerans_YIM70093","Chumireducens_DSM45392","Cimitans_DSM44264","Ckutscheri_DSM20755","Cmarinum_DSM44953","Cmaris_DS…	0.52529	0.202356	2.09829	0.323866	0.202356	2.09829	2306	0
ERS451417_01301	1717.62.peg.1309	NA	NA	NA	0.9989	38	Cargentoratense_DSM44202,"Catypicum_R2070","Caurimucosum_ATCC700975","Cbelfantii_FRC0043","Ccallunae_DSM20147","Ccamporealensis_DSM44610","Cdeserti_GIMN1010","Cdiphtheriae_NCTC11397","Cdoosanense_DSM45436","Cefficiens_YS314","Cepidermidicanis_DSM45586","Cfalsenii_DSM44353","Cglutamicum_ATCC13032","Cglycinophilum_AJ3170","Chalotolerans_YIM70093","Chumireducens_DSM45392","Cimitans_DSM44264","Cjeike…	0.122543	0.122543	1.60393	0.122543	0.122543	1.60393	258	0
ERS451417_01329	1717.62.peg.1337	NA	NA	NA	0.9989	38	Cargentoratense_DSM44202,"Catypicum_R2070","Caurimucosum_ATCC700975","Cbelfantii_FRC0043","Ccallunae_DSM20147","Ccamporealensis_DSM44610","Cdeserti_GIMN1010","Cdiphtheriae_NCTC11397","Cdoosanense_DSM45436","Cefficiens_YS314","Cepidermidicanis_DSM45586","Cfalsenii_DSM44353","Cglutamicum_ATCC13032","Cglycinophilum_AJ3170","Chalotolerans_YIM70093","Chumireducens_DSM45392","Cimitans_DSM44264","Cjeike…	0.0896303	0.0896303	1.93737	0.0896303	0.0896303	1.93736	258	0
ERS451417_01361	1717.62.peg.1369	NA	NA	NA	0.9989	38	Cargentoratense_DSM44202,"Catypicum_R2070","Caurimucosum_ATCC700975","Cbelfantii_FRC0043","Ccallunae_DSM20147","Ccamporealensis_DSM44610","Cdeserti_GIMN1010","Cdiphtheriae_NCTC11397","Cdoosanense_DSM45436","Cefficiens_YS314","Cepidermidicanis_DSM45586","Cfalsenii_DSM44353","Cglutamicum_ATCC13032","Cglycinophilum_AJ3170","Chalotolerans_YIM70093","Chumireducens_DSM45392","Cimitans_DSM44264","Cjeike…	0.143223	0.143223	1.76463	0.143223	0.143223	1.76464	258	0
ERS451417_00568	1717.62.peg.571	NA	NA	NA	0.9989	38	Cargentoratense_DSM44202,"Catypicum_R2070","Caurimucosum_ATCC700975","Cbelfantii_FRC0043","Ccallunae_DSM20147","Ccamporealensis_DSM44610","Cdeserti_GIMN1010","Cdiphtheriae_NCTC11397","Cdoosanense_DSM45436","Cefficiens_YS314","Cepidermidicanis_DSM45586","Cfalsenii_DSM44353","Cglutamicum_ATCC13032","Cglycinophilum_AJ3170","Chalotolerans_YIM70093","Chumireducens_DSM45392","Cimitans_DSM44264","Cjeike…	0.233069	0.233069	1.59774	0.23306	0.23306	1.59774	3330	0
ERS451417_01772	1717.62.peg.1774	NA	NA	NA	0.9989	20	Catypicum_R2070,"Cbelfantii_FRC0043","Ccallunae_DSM20147","Ccamporealensis_DSM44610","Cdeserti_GIMN1010","Cdiphtheriae_NCTC11397","Cefficiens_YS314","Cfalsenii_DSM44353","Cglutamicum_ATCC13032","Chalotolerans_YIM70093","Cimitans_DSM44264","Cjeikeium_K41","Cmarinum_DSM44953","Cpseudotuberculosis_31","Cpseudotuberculosis_ATCC19410","Csimulans_PES1","Culcerans_NCTC12077","Culcerans_NCTC7910","Cureal…	0.191154	0.191154	2.02933	0.191154	0.191154	2.02932	3330	0
ERS451417_01805	1717.62.peg.1811	NA	NA	NA	0.9989	38	Cargentoratense_DSM44202,"Catypicum_R2070","Caurimucosum_ATCC700975","Cbelfantii_FRC0043","Ccallunae_DSM20147","Ccamporealensis_DSM44610","Cdeserti_GIMN1010","Cdiphtheriae_NCTC11397","Cdoosanense_DSM45436","Cefficiens_YS314","Cepidermidicanis_DSM45586","Cfalsenii_DSM44353","Cglutamicum_ATCC13032","Cglycinophilum_AJ3170","Chalotolerans_YIM70093","Chumireducens_DSM45392","Cimitans_DSM44264","Cjeike…	0.0831572	0.0831572	1.59638	0.0831572	0.0831572	1.59638	1026	1	1. 0.51379;2. 268;3. 802;4. 304;5. 304;6. 910;7. 405;8. 1213;9. 694;10. E;11. GAA
ERS451417_00964	1717.62.peg.971	NA	NA	NA	0.9989	8	Cbelfantii_FRC0043,"Cdiphtheriae_NCTC11397","Cpseudotuberculosis_31","Cpseudotuberculosis_ATCC19410","Crouxii_FRC0190","Csilvaticum_KL0182","Culcerans_NCTC12077","Culcerans_NCTC7910"	0.04377	0.04377	2.54765	0.04377	0.04377	2.54766	258	0
ERS451417_00579	1717.62.peg.582	NA	NA	NA	0.9989	33	Cargentoratense_DSM44202,"Catypicum_R2070","Caurimucosum_ATCC700975","Cbelfantii_FRC0043","Ccallunae_DSM20147","Ccamporealensis_DSM44610","Cdeserti_GIMN1010","Cdiphtheriae_NCTC11397","Cdoosanense_DSM45436","Cefficiens_YS314","Cepidermidicanis_DSM45586","Cglutamicum_ATCC13032","Cglycinophilum_AJ3170","Chalotolerans_YIM70093","Chumireducens_DSM45392","Cimitans_DSM44264","Ckroppenstedtii_DSM44385","…	0.158205	0.158205	2.07867	0.158205	0.158205	2.07866	2	1	1. 0.42918;2. 163;3. 487;4. 169;5. 169;6. 505;7. 212;8. 634;9. 436;10. K;11. AAG
ERS451417_01511	1717.62.peg.1519	NA	NA	NA	0.9989	19	Caurimucosum_ATCC700975,"Cbelfantii_FRC0043","Ccallunae_DSM20147","Cdiphtheriae_NCTC11397","Cepidermidicanis_DSM45586","Cfalsenii_DSM44353","Cglutamicum_ATCC13032","Cglycinophilum_AJ3170","Chumireducens_DSM45392","Cjeikeium_K41","Ckroppenstedtii_DSM44385","Clactis_RW25","Cpseudotuberculosis_31","Cpseudotuberculosis_ATCC19410","Csilvaticum_KL0182","Csimulans_PES1","Culcerans_NCTC12077","Culcerans_…	0.208038	0.208038	1.87274	0.208038	0.208038	1.87274	1282	0
ERS451417_01680	1717.62.peg.1687	NA	NA	NA	0.9989	38	Cargentoratense_DSM44202,"Catypicum_R2070","Caurimucosum_ATCC700975","Cbelfantii_FRC0043","Ccallunae_DSM20147","Ccamporealensis_DSM44610","Cdeserti_GIMN1010","Cdiphtheriae_NCTC11397","Cdoosanense_DSM45436","Cefficiens_YS314","Cepidermidicanis_DSM45586","Cfalsenii_DSM44353","Cglutamicum_ATCC13032","Cglycinophilum_AJ3170","Chalotolerans_YIM70093","Chumireducens_DSM45392","Cimitans_DSM44264","Cjeike…	0.208425	0.208425	1.64923	0.208425	0.208425	1.64923	3074	1	1. 0.63774;2. 452;3. 1354;4. 601;5. 601;6. 1801;7. 806;8. 2416;9. 808;10. E;11. GAA
ERS451417_01864	1717.62.peg.1866	NA	NA	NA	0.9989	38	Cargentoratense_DSM44202,"Catypicum_R2070","Caurimucosum_ATCC700975","Cbelfantii_FRC0043","Ccallunae_DSM20147","Ccamporealensis_DSM44610","Cdeserti_GIMN1010","Cdiphtheriae_NCTC11397","Cdoosanense_DSM45436","Cefficiens_YS314","Cepidermidicanis_DSM45586","Cfalsenii_DSM44353","Cglutamicum_ATCC13032","Cglycinophilum_AJ3170","Chalotolerans_YIM70093","Chumireducens_DSM45392","Cimitans_DSM44264","Cjeike…	0.0995232	0.0995232	1.91486	0.0995232	0.0995232	1.91486	3074	1	1. 0.55212;2. 544;3. 1630;4. 549;5. 549;6. 1645;7. 564;8. 1690;9. 1255;10. F;11. TTC
ERS451417_01292	1717.62.peg.1300	NA	NA	NA	0.9989	38	Cargentoratense_DSM44202,"Catypicum_R2070","Caurimucosum_ATCC700975","Cbelfantii_FRC0043","Ccallunae_DSM20147","Ccamporealensis_DSM44610","Cdeserti_GIMN1010","Cdiphtheriae_NCTC11397","Cdoosanense_DSM45436","Cefficiens_YS314","Cepidermidicanis_DSM45586","Cfalsenii_DSM44353","Cglutamicum_ATCC13032","Cglycinophilum_AJ3170","Chalotolerans_YIM70093","Chumireducens_DSM45392","Cimitans_DSM44264","Cjeike…	0.178979	0.178979	1.67138	0.178979	0.178979	1.67138	2050	1	1. 0.48547;2. 149;3. 445;4. 169;5. 169;6. 505;7. 184;8. 550;9. 253;10. R;11. CGT
ERS451417_01640	1717.62.peg.1647	NA	NA	NA	0.9989	38	Cargentoratense_DSM44202,"Catypicum_R2070","Caurimucosum_ATCC700975","Cbelfantii_FRC0043","Ccallunae_DSM20147","Ccamporealensis_DSM44610","Cdeserti_GIMN1010","Cdiphtheriae_NCTC11397","Cdoosanense_DSM45436","Cefficiens_YS314","Cepidermidicanis_DSM45586","Cfalsenii_DSM44353","Cglutamicum_ATCC13032","Cglycinophilum_AJ3170","Chalotolerans_YIM70093","Chumireducens_DSM45392","Cimitans_DSM44264","Cjeike…	0.119462	0.119462	1.75247	0.119462	0.119462	1.75247	2	1	1. 0.62017;2. 378;3. 1132;4. 405;5. 405;6. 1213;7. 410;8. 1228;9. 1015;10. G;11. GGC
ERS451417_01256	1717.62.peg.1264	NA	NA	NA	0.9989	38	Cargentoratense_DSM44202,"Catypicum_R2070","Caurimucosum_ATCC700975","Cbelfantii_FRC0043","Ccallunae_DSM20147","Ccamporealensis_DSM44610","Cdeserti_GIMN1010","Cdiphtheriae_NCTC11397","Cdoosanense_DSM45436","Cefficiens_YS314","Cepidermidicanis_DSM45586","Cfalsenii_DSM44353","Cglutamicum_ATCC13032","Cglycinophilum_AJ3170","Chalotolerans_YIM70093","Chumireducens_DSM45392","Cimitans_DSM44264","Cjeike…	0.243822	0.243822	1.73847	0.243822	0.243822	1.73847	258	0
ERS451417_01575	1717.62.peg.1584	NA	NA	NA	0.9989	38	Cargentoratense_DSM44202,"Catypicum_R2070","Caurimucosum_ATCC700975","Cbelfantii_FRC0043","Ccallunae_DSM20147","Ccamporealensis_DSM44610","Cdeserti_GIMN1010","Cdiphtheriae_NCTC11397","Cdoosanense_DSM45436","Cefficiens_YS314","Cepidermidicanis_DSM45586","Cfalsenii_DSM44353","Cglutamicum_ATCC13032","Cglycinophilum_AJ3170","Chalotolerans_YIM70093","Chumireducens_DSM45392","Cimitans_DSM44264","Cjeike…	0.130402	0.130402	1.83645	0.130411	0.130411	1.83645	258	0
ERS451417_01473	1717.62.peg.1483	NA	NA	NA	0.9989	38	Cargentoratense_DSM44202,"Catypicum_R2070","Caurimucosum_ATCC700975","Cbelfantii_FRC0043","Ccallunae_DSM20147","Ccamporealensis_DSM44610","Cdeserti_GIMN1010","Cdiphtheriae_NCTC11397","Cdoosanense_DSM45436","Cefficiens_YS314","Cepidermidicanis_DSM45586","Cfalsenii_DSM44353","Cglutamicum_ATCC13032","Cglycinophilum_AJ3170","Chalotolerans_YIM70093","Chumireducens_DSM45392","Cimitans_DSM44264","Cjeike…	0.0558929	0.0558929	1.98945	0.0558929	0.0558929	1.98945	1282	0
ERS451417_00510	1717.62.peg.514	NA	NA	NA	0.9989	39	Cargentoratense_DSM44202,"Catypicum_R2070","Caurimucosum_ATCC700975","Cbelfantii_FRC0043","Ccallunae_DSM20147","Ccamporealensis_DSM44610","Cdeserti_GIMN1010","Cdiphtheriae_NCTC11397","Cdoosanense_DSM45436","Cefficiens_YS314","Cepidermidicanis_DSM45586","Cfalsenii_DSM44353","Cglutamicum_ATCC13032","Cglycinophilum_AJ3170","Chalotolerans_YIM70093","Chumireducens_DSM45392","Cimitans_DSM44264","Cjeike…	0.158306	0.158306	1.85962	0.158306	0.158306	1.85962	2050	1	1. 0.52325;2. 428;3. 1282;4. 428;5. 428;6. 1282;7. 428;8. 1282;9. 943;10. A;11. GCC
ERS451417_01720	1717.62.peg.1723	NA	NA	NA	1	20	Caurimucosum_ATCC700975,"Cbelfantii_FRC0043","Ccallunae_DSM20147","Cdeserti_GIMN1010","Cdiphtheriae_NCTC11397","Cdoosanense_DSM45436","Cefficiens_YS314","Cepidermidicanis_DSM45586","Cglutamicum_ATCC13032","Chalotolerans_YIM70093","Chumireducens_DSM45392","Cmarinum_DSM44953","Cpseudotuberculosis_31","Cpseudotuberculosis_ATCC19410","Csilvaticum_KL0182","Csingulare_IBSB52218","Ctestudinoris_DSM44614…	0.247717	0.247717	1.57881	0.247717	0.247717	1.57881	3330	0
ERS451417_00996	1717.62.peg.1007	NA	NA	NA	1	13	Cargentoratense_DSM44202,"Cbelfantii_FRC0043","Cdiphtheriae_NCTC11397","Cepidermidicanis_DSM45586","Ckroppenstedtii_DSM44385","Ckutscheri_DSM20755","Clactis_RW25","Cmustelae_DSM45274","Cpseudotuberculosis_31","Cpseudotuberculosis_ATCC19410","Crouxii_FRC0190","Culcerans_NCTC12077","Culcerans_NCTC7910"	0.156882	0.156882	2.39155	0.156882	0.156882	2.39155	3074	2	1. 0.41856;2. 185;3. 553;4. 227;5. 225;6. 673;7. 285;8. 853;9. 361;10. T;11. ACC	1. 0.45343;2. 337;3. 1009;4. 393;5. 387;6. 1159;7. 447;8. 1339;9. 772;10. I;11. ATC
ERS451417_01999	1717.62.peg.2003	NA	NA	NA	1	7	Cbelfantii_FRC0043,"Cdiphtheriae_NCTC11397","Cpseudotuberculosis_31","Cpseudotuberculosis_ATCC19410","Csilvaticum_KL0182","Culcerans_NCTC12077","Culcerans_NCTC7910"	0.321131	0.321131	4.35028	0.321131	0.321131	4.35028	2	3	1. 0.41269;2. 465;3. 1393;4. 465;5. 465;6. 1393;7. 465;8. 1393;9. 1393;10. A;11. GCA	1. 0.42541;2. 791;3. 2371;4. 791;5. 791;6. 2371;7. 791;8. 2371;9. 2371;10. H;11. CAC	1. 0.41647;2. 854;3. 2560;4. 854;5. 854;6. 2560;7. 854;8. 2560;9. 2560;10. Y;11. TAC
ERS451417_00974	1717.62.peg.984	NA	NA	NA	1	36	Cargentoratense_DSM44202,"Catypicum_R2070","Caurimucosum_ATCC700975","Cbelfantii_FRC0043","Ccallunae_DSM20147","Ccamporealensis_DSM44610","Cdeserti_GIMN1010","Cdiphtheriae_NCTC11397","Cdoosanense_DSM45436","Cefficiens_YS314","Cepidermidicanis_DSM45586","Cfalsenii_DSM44353","Cglutamicum_ATCC13032","Chalotolerans_YIM70093","Chumireducens_DSM45392","Cimitans_DSM44264","Cjeikeium_K41","Ckroppenstedti…	0.185652	0.185652	1.60751	0.185652	0.185652	1.60751	2306	0
ERS451417_01988	1717.62.peg.1989	NA	NA	NA	1	14	Caurimucosum_ATCC700975,"Cbelfantii_FRC0043","Ccamporealensis_DSM44610","Cdiphtheriae_NCTC11397","Cimitans_DSM44264","Cmustelae_DSM45274","CriegeliiPUDD83A45","Csilvaticum_KL0182","Csimulans_PES1","Csingulare_IBSB52218","Culcerans_NCTC12077","Culcerans_NCTC7910","Cureicelerivorans_IMMIBRIV2301","Cvitaeruminis_DSM20294"	0.30656	0.30656	1.88688	0.30656	0.30656	1.88688	2	1	1. 0.62231;2. 96;3. 286;4. 97;5. 97;6. 289;7. 97;8. 289;9. 280;10. L;11. TTA
ERS451417_00977	1717.62.peg.987	NA	NA	NA	1	28	Catypicum_R2070,"Caurimucosum_ATCC700975","Cbelfantii_FRC0043","Ccallunae_DSM20147","Ccamporealensis_DSM44610","Cdeserti_GIMN1010","Cdiphtheriae_NCTC11397","Cdoosanense_DSM45436","Cefficiens_YS314","Cglutamicum_ATCC13032","Chumireducens_DSM45392","Cimitans_DSM44264","Ckutscheri_DSM20755","Cmarinum_DSM44953","Cmaris_DSM45190","Cmustelae_DSM45274","Cpseudotuberculosis_31","Cpseudotuberculosis_ATCC1…	0.212826	0.212826	1.79348	0.212826	0.212826	1.79348	3330	0
ERS451417_00129	1717.62.peg.127	NA	NA	NA	1	39	Cargentoratense_DSM44202,"Catypicum_R2070","Caurimucosum_ATCC700975","Cbelfantii_FRC0043","Ccallunae_DSM20147","Ccamporealensis_DSM44610","Cdeserti_GIMN1010","Cdiphtheriae_NCTC11397","Cdoosanense_DSM45436","Cefficiens_YS314","Cepidermidicanis_DSM45586","Cfalsenii_DSM44353","Cglutamicum_ATCC13032","Cglycinophilum_AJ3170","Chalotolerans_YIM70093","Chumireducens_DSM45392","Cimitans_DSM44264","Cjeike…	0.0977509	0.0977509	1.95402	0.0977509	0.0977509	1.95402	258	0
ERS451417_00985	1717.62.peg.996	NA	NA	NA	1	38	Cargentoratense_DSM44202,"Catypicum_R2070","Caurimucosum_ATCC700975","Cbelfantii_FRC0043","Ccallunae_DSM20147","Ccamporealensis_DSM44610","Cdeserti_GIMN1010","Cdiphtheriae_NCTC11397","Cdoosanense_DSM45436","Cefficiens_YS314","Cepidermidicanis_DSM45586","Cfalsenii_DSM44353","Cglutamicum_ATCC13032","Cglycinophilum_AJ3170","Chalotolerans_YIM70093","Chumireducens_DSM45392","Cimitans_DSM44264","Cjeike…	0.198506	0.198506	1.65799	0.198506	0.198506	1.65799	2	1	1. 0.68701;2. 64;3. 190;4. 70;5. 70;6. 208;7. 122;8. 364;9. 142;10. S;11. AGC
ERS451417_00553	1717.62.peg.557	NA	NA	NA	1	7	Cbelfantii_FRC0043,"Cdiphtheriae_NCTC11397","Cpseudotuberculosis_ATCC19410","Crouxii_FRC0190","Csilvaticum_KL0182","Culcerans_NCTC12077","Culcerans_NCTC7910"	0.108411	0.108411	3.07819	0.108411	0.108411	3.07819	2050	3	1. 0.45923;2. 159;3. 475;4. 167;5. 159;6. 475;7. 159;8. 475;9. 313;10. R;11. CGC	1. 0.52414;2. 202;3. 604;4. 210;5. 202;6. 604;7. 202;8. 604;9. 442;10. P;11. CCA	1. 0.40122;2. 277;3. 829;4. 311;5. 277;6. 829;7. 277;8. 829;9. 667;10. V;11. GTC
ERS451417_00629	1717.62.peg.633	NA	NA	NA	1	38	Cargentoratense_DSM44202,"Caurimucosum_ATCC700975","Cbelfantii_FRC0043","Ccallunae_DSM20147","Ccamporealensis_DSM44610","Cdeserti_GIMN1010","Cdiphtheriae_NCTC11397","Cdoosanense_DSM45436","Cefficiens_YS314","Cepidermidicanis_DSM45586","Cfalsenii_DSM44353","Cglutamicum_ATCC13032","Cglycinophilum_AJ3170","Chalotolerans_YIM70093","Chumireducens_DSM45392","Cimitans_DSM44264","Cjeikeium_K41","Ckroppen…	0.0979692	0.0979692	1.92261	0.0979692	0.0979692	1.92261	258	0
ERS451417_01829	1717.62.peg.1833	NA	NA	NA	1	25	Catypicum_R2070,"Caurimucosum_ATCC700975","Cbelfantii_FRC0043","Ccallunae_DSM20147","Ccamporealensis_DSM44610","Cdeserti_GIMN1010","Cdiphtheriae_NCTC11397","Cdoosanense_DSM45436","Cefficiens_YS314","Cglutamicum_ATCC13032","Cglycinophilum_AJ3170","Chalotolerans_YIM70093","Chumireducens_DSM45392","Cimitans_DSM44264","Cmaris_DSM45190","Cpseudotuberculosis_31","Cpseudotuberculosis_ATCC19410","Csilvat…	0.245449	0.245449	1.87104	0.245449	0.245449	1.87104	3074	1	1. 0.67717;2. 226;3. 676;4. 244;5. 244;6. 730;7. 301;8. 901;9. 412;10. V;11. GTG
ERS451417_01012	1717.62.peg.1023	NA	NA	NA	1	30	Cargentoratense_DSM44202,"Caurimucosum_ATCC700975","Cbelfantii_FRC0043","Ccallunae_DSM20147","Ccamporealensis_DSM44610","Cdeserti_GIMN1010","Cdiphtheriae_NCTC11397","Cdoosanense_DSM45436","Cefficiens_YS314","Cglutamicum_ATCC13032","Chalotolerans_YIM70093","Chumireducens_DSM45392","Cimitans_DSM44264","Ckutscheri_DSM20755","Cmarinum_DSM44953","Cmaris_DSM45190","Cmustelae_DSM45274","Cpseudotuberculo…	0.143885	0.143885	1.54686	0.143885	0.143885	1.54686	2050	3	1. 0.60861;2. 264;3. 790;4. 333;5. 287;6. 859;7. 317;8. 949;9. 532;10. A;11. GCG	1. 0.58833;2. 349;3. 1045;4. 421;5. 372;6. 1114;7. 402;8. 1204;9. 787;10. S;11. AGC	1. 0.51015;2. 544;3. 1630;4. 636;5. 585;6. 1753;7. 645;8. 1933;9. 1213;10. A;11. GCC
ERS451417_00844	1717.62.peg.849	NA	NA	NA	1	13	Cbelfantii_FRC0043,"Cdiphtheriae_NCTC11397","Cefficiens_YS314","Cglutamicum_ATCC13032","Cimitans_DSM44264","Ckutscheri_DSM20755","Cpseudotuberculosis_31","Cpseudotuberculosis_ATCC19410","Crouxii_FRC0190","Csilvaticum_KL0182","Culcerans_NCTC7910","Cureicelerivorans_IMMIBRIV2301","Cvitaeruminis_DSM20294"	0.14264	0.14264	2.1795	0.14264	0.14264	2.1795	4098	2	1. 0.47099;2. 62;3. 184;4. 147;5. 63;6. 187;7. 67;8. 199;9. 115;10. R;11. CGT	1. 0.51906;2. 143;3. 427;4. 246;5. 145;6. 433;7. 149;8. 445;9. 358;10. S;11. AGC
ERS451417_01991	1717.62.peg.1992	NA	NA	NA	1	20	Catypicum_R2070,"Caurimucosum_ATCC700975","Cbelfantii_FRC0043","Cdiphtheriae_NCTC11397","Cfalsenii_DSM44353","Chumireducens_DSM45392","Ckroppenstedtii_DSM44385","Ckutscheri_DSM20755","Clactis_RW25","Cmustelae_DSM45274","Cpseudotuberculosis_31","Cpseudotuberculosis_ATCC19410","CriegeliiPUDD83A45","Csilvaticum_KL0182","Cterpenotabidum_Y11","Ctestudinoris_DSM44614","Culcerans_NCTC12077","Culcerans_N…	0.336073	0.243149	1.82157	0.336073	0.243149	1.82157	2	1	1. 0.82932;2. 261;3. 781;4. 277;5. 277;6. 829;7. 297;8. 889;9. 754;10. V;11. GTC
ERS451417_01605	1717.62.peg.1614	NA	NA	NA	1	38	Cargentoratense_DSM44202,"Catypicum_R2070","Caurimucosum_ATCC700975","Cbelfantii_FRC0043","Ccallunae_DSM20147","Ccamporealensis_DSM44610","Cdeserti_GIMN1010","Cdiphtheriae_NCTC11397","Cdoosanense_DSM45436","Cefficiens_YS314","Cepidermidicanis_DSM45586","Cfalsenii_DSM44353","Cglutamicum_ATCC13032","Cglycinophilum_AJ3170","Chalotolerans_YIM70093","Chumireducens_DSM45392","Cimitans_DSM44264","Cjeike…	0.103539	0.103539	1.67544	0.103539	0.103539	1.67544	258	0
ERS451417_00836	1717.62.peg.841	NA	NA	NA	1	39	Cargentoratense_DSM44202,"Catypicum_R2070","Caurimucosum_ATCC700975","Cbelfantii_FRC0043","Ccallunae_DSM20147","Ccamporealensis_DSM44610","Cdeserti_GIMN1010","Cdiphtheriae_NCTC11397","Cdoosanense_DSM45436","Cefficiens_YS314","Cepidermidicanis_DSM45586","Cfalsenii_DSM44353","Cglutamicum_ATCC13032","Cglycinophilum_AJ3170","Chalotolerans_YIM70093","Chumireducens_DSM45392","Cimitans_DSM44264","Cjeike…	0.0926537	0.0926537	1.86911	0.0926537	0.0926537	1.8691	2	1	1. 0.4317;2. 214;3. 640;4. 237;5. 237;6. 709;7. 272;8. 814;9. 610;10. G;11. GGT
ERS451417_00830	1717.62.peg.834	NA	NA	NA	1	9	Cbelfantii_FRC0043,"Cdiphtheriae_NCTC11397","Ckutscheri_DSM20755","Cpseudotuberculosis_31","Cpseudotuberculosis_ATCC19410","Crouxii_FRC0190","Culcerans_NCTC12077","Culcerans_NCTC7910","Cvitaeruminis_DSM20294"	0.373551	0.130889	2.26232	0.373591	0.130889	2.26234	2050	3	1. 0.73192;2. 77;3. 229;4. 108;5. 77;6. 229;7. 88;8. 262;9. 124;10. D;11. GAT	1. 0.76245;2. 90;3. 268;4. 121;5. 90;6. 268;7. 101;8. 301;9. 163;10. D;11. GAC	1. 0.79606;2. 134;3. 400;4. 165;5. 134;6. 400;7. 145;8. 433;9. 295;10. E;11. GAA
ERS451417_01278	1717.62.peg.1286	NA	NA	NA	1	23	Catypicum_R2070,"Ccallunae_DSM20147","Cdeserti_GIMN1010","Cdiphtheriae_NCTC11397","Cdoosanense_DSM45436","Cefficiens_YS314","Cglutamicum_ATCC13032","Chalotolerans_YIM70093","Chumireducens_DSM45392","Ckutscheri_DSM20755","Cmarinum_DSM44953","Cmaris_DSM45190","Cmustelae_DSM45274","Cpseudotuberculosis_31","Cpseudotuberculosis_ATCC19410","CriegeliiPUDD83A45","Crouxii_FRC0190","Csilvaticum_KL0182","Ct…	0.260918	0.260918	1.7622	0.260918	0.260918	1.7622	258	0
ERS451417_01682	1717.62.peg.1689	NA	NA	NA	1	11	Ccamporealensis_DSM44610,"Cdiphtheriae_NCTC11397","Cmaris_DSM45190","Cmustelae_DSM45274","Cpseudotuberculosis_31","Cpseudotuberculosis_ATCC19410","Culcerans_NCTC12077","Culcerans_NCTC7910","Cureicelerivorans_IMMIBRIV2301","Cuterequi_DSM45634","Cvitaeruminis_DSM20294"	0.343493	0.343493	1.75868	0.343493	0.343493	1.75867	2	1	1. 0.48336;2. 115;3. 343;4. 168;5. 151;6. 451;7. 159;8. 475;9. 307;10. V;11. GTG
ERS451417_00071	1717.62.peg.67	NA	NA	NA	1	15	Caurimucosum_ATCC700975,"Cbelfantii_FRC0043","Cdiphtheriae_NCTC11397","Cepidermidicanis_DSM45586","Ckutscheri_DSM20755","Clactis_RW25","Cmustelae_DSM45274","Cpseudotuberculosis_31","Cpseudotuberculosis_ATCC19410","CriegeliiPUDD83A45","Crouxii_FRC0190","Csilvaticum_KL0182","Culcerans_NCTC12077","Culcerans_NCTC7910","Cvitaeruminis_DSM20294"	0.31722	0.31722	2.41704	0.31722	0.31722	2.41704	258	0
ERS451417_00384	1717.62.peg.384	NA	NA	NA	1	6	Cbelfantii_FRC0043,"Cdiphtheriae_NCTC11397","Clactis_RW25","Crouxii_FRC0190","Csilvaticum_KL0182","Culcerans_NCTC7910"	1	0.195844	2.41414	1	0.195844	2.41414	6144	5	1. 0.74771;2. 5;3. 13;4. 7;5. 7;6. 19;7. 7;8. 19;9. 7;10. A;11. GCT	1. 0.60674;2. 42;3. 124;4. 44;5. 44;6. 130;7. 44;8. 130;9. 118;10. D;11. GAT	1. 0.4929;2. 52;3. 154;4. 56;5. 54;6. 160;7. 54;8. 160;9. 148;10. L;11. TTG	1. 0.596;2. 155;3. 463;4. 162;5. 157;6. 469;7. 169;8. 505;9. 391;10. M;11. ATG	1. 0.64492;2. 200;3. 598;4. 207;5. 202;6. 604;7. 215;8. 643;9. 490;10. S;11. AGC
ERS451417_01715	1717.62.peg.1718	NA	NA	NA	1	38	Cargentoratense_DSM44202,"Catypicum_R2070","Caurimucosum_ATCC700975","Cbelfantii_FRC0043","Ccallunae_DSM20147","Ccamporealensis_DSM44610","Cdeserti_GIMN1010","Cdiphtheriae_NCTC11397","Cdoosanense_DSM45436","Cefficiens_YS314","Cepidermidicanis_DSM45586","Cfalsenii_DSM44353","Cglutamicum_ATCC13032","Cglycinophilum_AJ3170","Chalotolerans_YIM70093","Chumireducens_DSM45392","Cimitans_DSM44264","Cjeike…	0.111617	0.111617	1.78562	0.111617	0.111617	1.78562	2	1	1. 0.61628;2. 237;3. 709;4. 277;5. 277;6. 829;7. 359;8. 1075;9. 484;10. H;11. CAT
ERS451417_02066	1717.62.peg.2078	NA	NA	NA	1	38	Cargentoratense_DSM44202,"Catypicum_R2070","Caurimucosum_ATCC700975","Cbelfantii_FRC0043","Ccallunae_DSM20147","Ccamporealensis_DSM44610","Cdeserti_GIMN1010","Cdiphtheriae_NCTC11397","Cdoosanense_DSM45436","Cefficiens_YS314","Cepidermidicanis_DSM45586","Cfalsenii_DSM44353","Cglutamicum_ATCC13032","Cglycinophilum_AJ3170","Chalotolerans_YIM70093","Chumireducens_DSM45392","Cimitans_DSM44264","Cjeike…	0.0917871	0.0917871	2.21559	0.0917871	0.0917871	2.21558	258	0
ERS451417_01700	1717.62.peg.1706	NA	NA	NA	1	38	Cargentoratense_DSM44202,"Catypicum_R2070","Caurimucosum_ATCC700975","Cbelfantii_FRC0043","Ccallunae_DSM20147","Ccamporealensis_DSM44610","Cdeserti_GIMN1010","Cdiphtheriae_NCTC11397","Cdoosanense_DSM45436","Cefficiens_YS314","Cepidermidicanis_DSM45586","Cfalsenii_DSM44353","Cglutamicum_ATCC13032","Cglycinophilum_AJ3170","Chalotolerans_YIM70093","Chumireducens_DSM45392","Cimitans_DSM44264","Cjeike…	0.124964	0.124964	1.71433	0.124964	0.124964	1.71433	258	0
ERS451417_00959	1717.62.peg.966	NA	NA	NA	1	39	Cargentoratense_DSM44202,"Catypicum_R2070","Caurimucosum_ATCC700975","Cbelfantii_FRC0043","Ccallunae_DSM20147","Ccamporealensis_DSM44610","Cdeserti_GIMN1010","Cdiphtheriae_NCTC11397","Cdoosanense_DSM45436","Cefficiens_YS314","Cepidermidicanis_DSM45586","Cfalsenii_DSM44353","Cglutamicum_ATCC13032","Cglycinophilum_AJ3170","Chalotolerans_YIM70093","Chumireducens_DSM45392","Cimitans_DSM44264","Cjeike…	0.318538	0.318538	1.71846	0.318538	0.318538	1.71846	258	0
ERS451417_00349	1717.62.peg.352	NA	NA	NA	1	13	Cbelfantii_FRC0043,"Cdiphtheriae_NCTC11397","Cepidermidicanis_DSM45586","Ckroppenstedtii_DSM44385","Clactis_RW25","Cpseudotuberculosis_31","Cpseudotuberculosis_ATCC19410","Crouxii_FRC0190","Csilvaticum_KL0182","Csimulans_PES1","Ctestudinoris_DSM44614","Culcerans_NCTC12077","Culcerans_NCTC7910"	0.111449	0.111449	1.89179	0.111449	0.111449	1.89179	258	0
ERS451417_00769	1717.62.peg.774	NA	NA	NA	1	30	Catypicum_R2070,"Caurimucosum_ATCC700975","Cbelfantii_FRC0043","Ccamporealensis_DSM44610","Cdeserti_GIMN1010","Cdiphtheriae_NCTC11397","Cdoosanense_DSM45436","Cefficiens_YS314","Cepidermidicanis_DSM45586","Cglutamicum_ATCC13032","Chalotolerans_YIM70093","Chumireducens_DSM45392","Cimitans_DSM44264","Ckutscheri_DSM20755","Cmarinum_DSM44953","Cmaris_DSM45190","Cmustelae_DSM45274","Cpseudotuberculosi…	0.322452	0.322452	1.5954	0.322452	0.322452	1.5954	3074	2	1. 0.52349;2. 83;3. 247;4. 100;5. 92;6. 274;7. 128;8. 382;9. 103;10. A;11. GCG	1. 0.5531;2. 91;3. 271;4. 108;5. 100;6. 298;7. 136;8. 406;9. 127;10. L;11. CTA
ERS451417_00400	1717.62.peg.400	NA	NA	NA	1	39	Cargentoratense_DSM44202,"Catypicum_R2070","Caurimucosum_ATCC700975","Cbelfantii_FRC0043","Ccallunae_DSM20147","Ccamporealensis_DSM44610","Cdeserti_GIMN1010","Cdiphtheriae_NCTC11397","Cdoosanense_DSM45436","Cefficiens_YS314","Cepidermidicanis_DSM45586","Cfalsenii_DSM44353","Cglutamicum_ATCC13032","Cglycinophilum_AJ3170","Chalotolerans_YIM70093","Chumireducens_DSM45392","Cimitans_DSM44264","Cjeike…	0.0674612	0.0674612	2.85346	0.0674612	0.0674612	2.85346	258	0
ERS451417_01264	1717.62.peg.1272	NA	NA	NA	1	39	Cargentoratense_DSM44202,"Catypicum_R2070","Caurimucosum_ATCC700975","Cbelfantii_FRC0043","Ccallunae_DSM20147","Ccamporealensis_DSM44610","Cdeserti_GIMN1010","Cdiphtheriae_NCTC11397","Cdoosanense_DSM45436","Cefficiens_YS314","Cepidermidicanis_DSM45586","Cfalsenii_DSM44353","Cglutamicum_ATCC13032","Cglycinophilum_AJ3170","Chalotolerans_YIM70093","Chumireducens_DSM45392","Cimitans_DSM44264","Cjeike…	0.257484	0.257484	1.61867	0.257484	0.257484	1.61867	258	0
ERS451417_00342	1717.62.peg.345	NA	NA	NA	1	33	Cargentoratense_DSM44202,"Catypicum_R2070","Caurimucosum_ATCC700975","Cbelfantii_FRC0043","Ccallunae_DSM20147","Ccamporealensis_DSM44610","Cdeserti_GIMN1010","Cdiphtheriae_NCTC11397","Cdoosanense_DSM45436","Cefficiens_YS314","Cepidermidicanis_DSM45586","Cglutamicum_ATCC13032","Chalotolerans_YIM70093","Chumireducens_DSM45392","Cimitans_DSM44264","Ckutscheri_DSM20755","Clactis_RW25","Cmarinum_DSM44…	0.244708	0.241805	1.68473	0.244699	0.241805	1.68473	3074	2	1. 0.67612;2. 207;3. 619;4. 309;5. 263;6. 787;7. 298;8. 892;9. 505;10. V;11. GTA	1. 0.51269;2. 232;3. 694;4. 340;5. 289;6. 865;7. 325;8. 973;9. 577;10. V;11. GTG
ERS451417_01951	1717.62.peg.1951	NA	NA	NA	1	38	Cargentoratense_DSM44202,"Catypicum_R2070","Caurimucosum_ATCC700975","Cbelfantii_FRC0043","Ccallunae_DSM20147","Ccamporealensis_DSM44610","Cdeserti_GIMN1010","Cdiphtheriae_NCTC11397","Cdoosanense_DSM45436","Cefficiens_YS314","Cepidermidicanis_DSM45586","Cfalsenii_DSM44353","Cglutamicum_ATCC13032","Cglycinophilum_AJ3170","Chalotolerans_YIM70093","Chumireducens_DSM45392","Cimitans_DSM44264","Cjeike…	0.127699	0.127699	1.85499	0.127699	0.127699	1.85499	2	1	1. 0.66881;2. 444;3. 1330;4. 472;5. 472;6. 1414;7. 483;8. 1447;9. 1258;10. A;11. GCC
ERS451417_02287	1717.62.peg.2316	NA	NA	NA	1	26	Catypicum_R2070,"Caurimucosum_ATCC700975","Cbelfantii_FRC0043","Ccallunae_DSM20147","Ccamporealensis_DSM44610","Cdeserti_GIMN1010","Cdiphtheriae_NCTC11397","Cdoosanense_DSM45436","Cefficiens_YS314","Cepidermidicanis_DSM45586","Cglutamicum_ATCC13032","Chalotolerans_YIM70093","Chumireducens_DSM45392","Ckutscheri_DSM20755","Cmarinum_DSM44953","Cmaris_DSM45190","Cpseudotuberculosis_31","Cpseudotuberc…	0.0469233	0.0469233	1.80952	0.0469233	0.0469233	1.80952	258	0
ERS451417_00545	1717.62.peg.549	NA	NA	NA	1	8	Ccallunae_DSM20147,"Cdiphtheriae_NCTC11397","Cepidermidicanis_DSM45586","Chumireducens_DSM45392","Cmarinum_DSM44953","Csilvaticum_KL0182","Culcerans_NCTC12077","Culcerans_NCTC7910"	0.184612	0.184612	2.20737	0.184612	0.184612	2.20737	3074	1	1. 0.46841;2. 404;3. 1210;4. 547;5. 453;6. 1357;7. 526;8. 1576;9. 793;10. R;11. AGA
ERS451417_01334	1717.62.peg.1342	NA	NA	NA	1	38	Cargentoratense_DSM44202,"Catypicum_R2070","Caurimucosum_ATCC700975","Cbelfantii_FRC0043","Ccallunae_DSM20147","Ccamporealensis_DSM44610","Cdeserti_GIMN1010","Cdiphtheriae_NCTC11397","Cdoosanense_DSM45436","Cefficiens_YS314","Cepidermidicanis_DSM45586","Cfalsenii_DSM44353","Cglutamicum_ATCC13032","Cglycinophilum_AJ3170","Chalotolerans_YIM70093","Chumireducens_DSM45392","Cimitans_DSM44264","Cjeike…	0.149509	0.149509	1.57651	0.149509	0.149509	1.5765	258	0
ERS451417_01630	1717.62.peg.1637	NA	NA	NA	1	37	Cargentoratense_DSM44202,"Catypicum_R2070","Caurimucosum_ATCC700975","Cbelfantii_FRC0043","Ccallunae_DSM20147","Ccamporealensis_DSM44610","Cdeserti_GIMN1010","Cdiphtheriae_NCTC11397","Cdoosanense_DSM45436","Cefficiens_YS314","Cepidermidicanis_DSM45586","Cfalsenii_DSM44353","Cglutamicum_ATCC13032","Cglycinophilum_AJ3170","Chalotolerans_YIM70093","Cimitans_DSM44264","Cjeikeium_K41","Ckroppenstedtii…	0.0523978	0.0523978	1.72669	0.0523881	0.0523881	1.72669	258	0
ERS451417_01491	1717.62.peg.1499	NA	NA	NA	1	38	Cargentoratense_DSM44202,"Catypicum_R2070","Caurimucosum_ATCC700975","Cbelfantii_FRC0043","Ccallunae_DSM20147","Ccamporealensis_DSM44610","Cdeserti_GIMN1010","Cdiphtheriae_NCTC11397","Cdoosanense_DSM45436","Cefficiens_YS314","Cepidermidicanis_DSM45586","Cfalsenii_DSM44353","Cglutamicum_ATCC13032","Cglycinophilum_AJ3170","Chalotolerans_YIM70093","Chumireducens_DSM45392","Cimitans_DSM44264","Cjeike…	0.240584	0.214273	1.7938	0.240564	0.214263	1.7938	2050	1	1. 0.71253;2. 126;3. 376;4. 131;5. 131;6. 391;7. 139;8. 415;9. 307;10. D;11. GAT
ERS451417_00772	1717.62.peg.777	NA	NA	NA	1	11	Cbelfantii_FRC0043,"Cdiphtheriae_NCTC11397","Cefficiens_YS314","Cmustelae_DSM45274","Cpseudotuberculosis_31","Cpseudotuberculosis_ATCC19410","Crouxii_FRC0190","Csilvaticum_KL0182","Culcerans_NCTC12077","Culcerans_NCTC7910","Cvitaeruminis_DSM20294"	0.23253	0.160846	2.58885	0.23252	0.160846	2.58885	2	2	1. 0.72033;2. 43;3. 127;4. 51;5. 48;6. 142;7. 48;8. 142;9. 106;10. Q;11. CAG	1. 0.48911;2. 63;3. 187;4. 75;5. 68;6. 202;7. 70;8. 208;9. 139;10. A;11. GCA
ERS451417_02305	1717.62.peg.2332	NA	NA	NA	1	34	Catypicum_R2070,"Caurimucosum_ATCC700975","Cbelfantii_FRC0043","Ccallunae_DSM20147","Ccamporealensis_DSM44610","Cdeserti_GIMN1010","Cdiphtheriae_NCTC11397","Cdoosanense_DSM45436","Cefficiens_YS314","Cepidermidicanis_DSM45586","Cfalsenii_DSM44353","Cglutamicum_ATCC13032","Cglycinophilum_AJ3170","Chalotolerans_YIM70093","Chumireducens_DSM45392","Cimitans_DSM44264","Cjeikeium_K41","Ckutscheri_DSM207…	0.27943	0.27943	1.9863	0.279431	0.279431	1.9863	2306	0
ERS451417_00497	1717.62.peg.501	NA	NA	NA	1	39	Cargentoratense_DSM44202,"Catypicum_R2070","Caurimucosum_ATCC700975","Cbelfantii_FRC0043","Ccallunae_DSM20147","Ccamporealensis_DSM44610","Cdeserti_GIMN1010","Cdiphtheriae_NCTC11397","Cdoosanense_DSM45436","Cefficiens_YS314","Cepidermidicanis_DSM45586","Cfalsenii_DSM44353","Cglutamicum_ATCC13032","Cglycinophilum_AJ3170","Chalotolerans_YIM70093","Chumireducens_DSM45392","Cimitans_DSM44264","Cjeike…	0.19707	0.19707	1.72695	0.19707	0.19707	1.72695	2	1	1. 0.5495;2. 68;3. 202;4. 91;5. 91;6. 271;7. 128;8. 382;9. 151;10. S;11. TCT
ERS451417_00158	1717.62.peg.156	NA	NA	NA	1	12	Cdiphtheriae_NCTC11397,"Cmustelae_DSM45274","Cpseudotuberculosis_31","Cpseudotuberculosis_ATCC19410","Crouxii_FRC0190","Csilvaticum_KL0182","Csimulans_PES1","Csingulare_IBSB52218","Culcerans_NCTC12077","Culcerans_NCTC7910","Curealyticum_DSM7109","Cvitaeruminis_DSM20294"	0.316321	0.204131	2.27884	0.316321	0.204131	2.27884	3074	2	1. 0.78166;2. 121;3. 361;4. 139;5. 127;6. 379;7. 173;8. 517;9. 253;10. I;11. ATT	1. 0.77627;2. 157;3. 469;4. 175;5. 163;6. 487;7. 209;8. 625;9. 361;10. G;11. GGA
ERS451417_00875	1717.62.peg.881	NA	NA	NA	1	24	Catypicum_R2070,"Cbelfantii_FRC0043","Ccallunae_DSM20147","Ccamporealensis_DSM44610","Cdeserti_GIMN1010","Cdiphtheriae_NCTC11397","Cdoosanense_DSM45436","Cefficiens_YS314","Cepidermidicanis_DSM45586","Chalotolerans_YIM70093","Chumireducens_DSM45392","Cimitans_DSM44264","Ckutscheri_DSM20755","Cmarinum_DSM44953","Cmaris_DSM45190","Cmustelae_DSM45274","Cpseudotuberculosis_31","Cpseudotuberculosis_AT…	0.246404	0.246404	1.62931	0.246404	0.246404	1.62931	3074	1	1. 0.57772;2. 77;3. 229;4. 108;5. 93;6. 277;7. 123;8. 367;9. 166;10. I;11. ATT
ERS451417_00576	1717.62.peg.579	NA	NA	NA	1	8	Cbelfantii_FRC0043,"Cdiphtheriae_NCTC11397","Cpseudotuberculosis_31","Cpseudotuberculosis_ATCC19410","Crouxii_FRC0190","Csilvaticum_KL0182","Culcerans_NCTC12077","Culcerans_NCTC7910"	0.0597445	0.0597445	2.95762	0.0597445	0.0597445	2.95759	2306	0
ERS451417_00766	1717.62.peg.771	NA	NA	NA	1	9	Cbelfantii_FRC0043,"Cdiphtheriae_NCTC11397","Cpseudotuberculosis_31","Cpseudotuberculosis_ATCC19410","Crouxii_FRC0190","Csilvaticum_KL0182","Culcerans_NCTC12077","Culcerans_NCTC7910","Cvitaeruminis_DSM20294"	0.36783	0.344056	3.04718	0.36783	0.344056	3.04718	2	1	1. 0.70827;2. 136;3. 406;4. 234;5. 147;6. 439;7. 150;8. 448;9. 379;10. P;11. CCC
ERS451417_01316	1717.62.peg.1324	NA	NA	NA	1	36	Catypicum_R2070,"Caurimucosum_ATCC700975","Cbelfantii_FRC0043","Ccallunae_DSM20147","Ccamporealensis_DSM44610","Cdeserti_GIMN1010","Cdiphtheriae_NCTC11397","Cdoosanense_DSM45436","Cefficiens_YS314","Cepidermidicanis_DSM45586","Cfalsenii_DSM44353","Cglutamicum_ATCC13032","Cglycinophilum_AJ3170","Chalotolerans_YIM70093","Chumireducens_DSM45392","Cimitans_DSM44264","Cjeikeium_K41","Ckroppenstedtii_D…	0.215411	0.215411	1.63636	0.215411	0.215411	1.63636	1026	1	1. 0.6673;2. 119;3. 355;4. 125;5. 125;6. 373;7. 131;8. 391;9. 310;10. N;11. AAT
ERS451417_01892	1717.62.peg.1891	NA	NA	NA	1	17	Cargentoratense_DSM44202,"Cbelfantii_FRC0043","Ccallunae_DSM20147","Cdiphtheriae_NCTC11397","Cefficiens_YS314","Cepidermidicanis_DSM45586","Cglutamicum_ATCC13032","Ckroppenstedtii_DSM44385","Ckutscheri_DSM20755","Clactis_RW25","Cmustelae_DSM45274","Cpseudotuberculosis_31","Cpseudotuberculosis_ATCC19410","Csilvaticum_KL0182","Culcerans_NCTC12077","Culcerans_NCTC7910","Cvitaeruminis_DSM20294"	0.191768	0.158445	2.42121	0.191768	0.158445	2.42121	2	1	1. 0.69072;2. 149;3. 445;4. 155;5. 155;6. 463;7. 157;8. 469;9. 391;10. A;11. GCA
ERS451417_01305	1717.62.peg.1313	NA	NA	NA	1	28	Cargentoratense_DSM44202,"Caurimucosum_ATCC700975","Cbelfantii_FRC0043","Ccallunae_DSM20147","Cdeserti_GIMN1010","Cdiphtheriae_NCTC11397","Cdoosanense_DSM45436","Cefficiens_YS314","Cepidermidicanis_DSM45586","Cfalsenii_DSM44353","Cglutamicum_ATCC13032","Chalotolerans_YIM70093","Chumireducens_DSM45392","Cjeikeium_K41","Clactis_RW25","Cmarinum_DSM44953","Cmaris_DSM45190","Cmustelae_DSM45274","Cpseu…	0.189563	0.189563	1.65279	0.189563	0.189563	1.6528	3330	0
ERS451417_01751	1717.62.peg.1754	NA	NA	NA	1	8	Cbelfantii_FRC0043,"Cdiphtheriae_NCTC11397","Ckutscheri_DSM20755","Cpseudotuberculosis_ATCC19410","Csilvaticum_KL0182","Culcerans_NCTC12077","Culcerans_NCTC7910","Cvitaeruminis_DSM20294"	0.0610306	0.0610306	2.0077	0.0610306	0.0610306	2.0077	258	0
ERS451417_01273	1717.62.peg.1281	NA	NA	NA	1	17	Cargentoratense_DSM44202,"Cbelfantii_FRC0043","Cdiphtheriae_NCTC11397","Cefficiens_YS314","Cepidermidicanis_DSM45586","Cglutamicum_ATCC13032","Ckroppenstedtii_DSM44385","Ckutscheri_DSM20755","Clactis_RW25","Cmustelae_DSM45274","Cpseudotuberculosis_31","Cpseudotuberculosis_ATCC19410","Crouxii_FRC0190","Csilvaticum_KL0182","Culcerans_NCTC12077","Culcerans_NCTC7910","Cvitaeruminis_DSM20294"	0.0973196	0.0973196	2.21868	0.0973196	0.0973196	2.21867	2	1	1. 0.48726;2. 341;3. 1021;4. 352;5. 352;6. 1054;7. 424;8. 1270;9. 904;10. A;11. GCA
ERS451417_02357	1717.62.peg.2386	NA	NA	NA	1	12	Catypicum_R2070,"Cbelfantii_FRC0043","Cdiphtheriae_NCTC11397","Cfalsenii_DSM44353","Cimitans_DSM44264","Cpseudotuberculosis_31","Csimulans_PES1","Cterpenotabidum_Y11","Ctestudinoris_DSM44614","Culcerans_NCTC12077","Culcerans_NCTC7910","Cureicelerivorans_IMMIBRIV2301"	0.0775112	0.0775112	1.53833	0.0775112	0.0775112	1.53833	2	1	1. 0.66388;2. 68;3. 202;4. 75;5. 75;6. 223;7. 74;8. 220;9. 196;10. I;11. ATT
ERS451417_00458	1717.62.peg.462	NA	NA	NA	1	39	Cargentoratense_DSM44202,"Catypicum_R2070","Caurimucosum_ATCC700975","Cbelfantii_FRC0043","Ccallunae_DSM20147","Ccamporealensis_DSM44610","Cdeserti_GIMN1010","Cdiphtheriae_NCTC11397","Cdoosanense_DSM45436","Cefficiens_YS314","Cepidermidicanis_DSM45586","Cfalsenii_DSM44353","Cglutamicum_ATCC13032","Cglycinophilum_AJ3170","Chalotolerans_YIM70093","Chumireducens_DSM45392","Cimitans_DSM44264","Cjeike…	0.199423	0.199423	1.86961	0.199433	0.199433	1.86961	258	0
ERS451417_02139	1717.62.peg.2159	NA	NA	NA	1	21	Cbelfantii_FRC0043,"Ccallunae_DSM20147","Cdeserti_GIMN1010","Cdiphtheriae_NCTC11397","Cdoosanense_DSM45436","Cefficiens_YS314","Cglutamicum_ATCC13032","Chumireducens_DSM45392","Ckutscheri_DSM20755","Clactis_RW25","Cmarinum_DSM44953","Cmustelae_DSM45274","Cpseudotuberculosis_31","Cpseudotuberculosis_ATCC19410","Csilvaticum_KL0182","Cterpenotabidum_Y11","Ctestudinoris_DSM44614","Culcerans_NCTC12077…	0.131925	0.131925	2.16421	0.13179	0.13179	2.15774	258	0
ERS451417_01209	1717.62.peg.1217	NA	NA	NA	1	32	Cargentoratense_DSM44202,"Catypicum_R2070","Cbelfantii_FRC0043","Ccallunae_DSM20147","Cdeserti_GIMN1010","Cdiphtheriae_NCTC11397","Cefficiens_YS314","Cepidermidicanis_DSM45586","Cfalsenii_DSM44353","Cglutamicum_ATCC13032","Cglycinophilum_AJ3170","Chalotolerans_YIM70093","Chumireducens_DSM45392","Cimitans_DSM44264","Cjeikeium_K41","Ckroppenstedtii_DSM44385","Ckutscheri_DSM20755","Clactis_RW25","Cm…	0.212171	0.212171	1.50112	0.212171	0.212171	1.50112	3330	0
ERS451417_01865	1717.62.peg.1867	NA	NA	NA	1	38	Cargentoratense_DSM44202,"Catypicum_R2070","Caurimucosum_ATCC700975","Cbelfantii_FRC0043","Ccallunae_DSM20147","Ccamporealensis_DSM44610","Cdeserti_GIMN1010","Cdiphtheriae_NCTC11397","Cdoosanense_DSM45436","Cefficiens_YS314","Cepidermidicanis_DSM45586","Cfalsenii_DSM44353","Cglutamicum_ATCC13032","Cglycinophilum_AJ3170","Chalotolerans_YIM70093","Chumireducens_DSM45392","Cimitans_DSM44264","Cjeike…	0.0653431	0.0653431	1.40242	0.0653431	0.0653431	1.40241	1282	0
ERS451417_01048	1717.62.peg.1058	NA	NA	NA	1	39	Cargentoratense_DSM44202,"Catypicum_R2070","Caurimucosum_ATCC700975","Cbelfantii_FRC0043","Ccallunae_DSM20147","Ccamporealensis_DSM44610","Cdeserti_GIMN1010","Cdiphtheriae_NCTC11397","Cdoosanense_DSM45436","Cefficiens_YS314","Cepidermidicanis_DSM45586","Cfalsenii_DSM44353","Cglutamicum_ATCC13032","Cglycinophilum_AJ3170","Chalotolerans_YIM70093","Chumireducens_DSM45392","Cimitans_DSM44264","Cjeike…	0.214985	0.214985	1.54556	0.214985	0.214985	1.54556	3074	1	1. 0.5895;2. 270;3. 808;4. 290;5. 290;6. 868;7. 344;8. 1030;9. 709;10. H;11. CAC
ERS451417_00779	1717.62.peg.786	NA	NA	NA	1	34	Cargentoratense_DSM44202,"Catypicum_R2070","Caurimucosum_ATCC700975","Cbelfantii_FRC0043","Ccallunae_DSM20147","Ccamporealensis_DSM44610","Cdeserti_GIMN1010","Cdiphtheriae_NCTC11397","Cdoosanense_DSM45436","Cefficiens_YS314","Cepidermidicanis_DSM45586","Cfalsenii_DSM44353","Cglutamicum_ATCC13032","Chalotolerans_YIM70093","Chumireducens_DSM45392","Cimitans_DSM44264","Cjeikeium_K41","Ckutscheri_DSM…	0.410258	0.410258	1.5524	0.410258	0.410258	1.5524	3330	0
ERS451417_00256	1717.62.peg.251	NA	NA	NA	1	39	Cargentoratense_DSM44202,"Catypicum_R2070","Caurimucosum_ATCC700975","Cbelfantii_FRC0043","Ccallunae_DSM20147","Ccamporealensis_DSM44610","Cdeserti_GIMN1010","Cdiphtheriae_NCTC11397","Cdoosanense_DSM45436","Cefficiens_YS314","Cepidermidicanis_DSM45586","Cfalsenii_DSM44353","Cglutamicum_ATCC13032","Cglycinophilum_AJ3170","Chalotolerans_YIM70093","Chumireducens_DSM45392","Cimitans_DSM44264","Cjeike…	0.132014	0.132014	1.77325	0.132014	0.132014	1.77325	2	1	1. 0.65915;2. 682;3. 2044;4. 775;5. 775;6. 2323;7. 937;8. 2809;9. 1705;10. E;11. GAA
ERS451417_00847	1717.62.peg.852	NA	NA	NA	1	36	Cargentoratense_DSM44202,"Catypicum_R2070","Caurimucosum_ATCC700975","Cbelfantii_FRC0043","Ccallunae_DSM20147","Ccamporealensis_DSM44610","Cdeserti_GIMN1010","Cdiphtheriae_NCTC11397","Cdoosanense_DSM45436","Cefficiens_YS314","Cepidermidicanis_DSM45586","Cfalsenii_DSM44353","Cglutamicum_ATCC13032","Cglycinophilum_AJ3170","Chalotolerans_YIM70093","Chumireducens_DSM45392","Cimitans_DSM44264","Cjeike…	0.116338	0.116338	1.74858	0.116338	0.116338	1.74858	1282	0
ERS451417_01588	1717.62.peg.1597	NA	NA	NA	1	36	Cargentoratense_DSM44202,"Caurimucosum_ATCC700975","Cbelfantii_FRC0043","Ccallunae_DSM20147","Ccamporealensis_DSM44610","Cdeserti_GIMN1010","Cdiphtheriae_NCTC11397","Cdoosanense_DSM45436","Cefficiens_YS314","Cepidermidicanis_DSM45586","Cfalsenii_DSM44353","Cglutamicum_ATCC13032","Cglycinophilum_AJ3170","Chalotolerans_YIM70093","Chumireducens_DSM45392","Cimitans_DSM44264","Cjeikeium_K41","Ckroppen…	23.4112	0.223166	1.61197	0.223229	0.223229	1.61054	256	0
ERS451417_02259	1717.62.peg.2288	NA	NA	NA	1	14	Caurimucosum_ATCC700975,"Cbelfantii_FRC0043","Ccamporealensis_DSM44610","Cdiphtheriae_NCTC11397","Ckroppenstedtii_DSM44385","Clactis_RW25","Cmustelae_DSM45274","Cpseudotuberculosis_31","Cpseudotuberculosis_ATCC19410","Csilvaticum_KL0182","Csimulans_PES1","Csingulare_IBSB52218","Culcerans_NCTC12077","Culcerans_NCTC7910"	0.151046	0.151046	2.51315	0.151046	0.151046	2.51315	258	0
ERS451417_00208	1717.62.peg.205	NA	NA	NA	1	37	Cargentoratense_DSM44202,"Catypicum_R2070","Caurimucosum_ATCC700975","Cbelfantii_FRC0043","Ccallunae_DSM20147","Ccamporealensis_DSM44610","Cdeserti_GIMN1010","Cdiphtheriae_NCTC11397","Cdoosanense_DSM45436","Cefficiens_YS314","Cepidermidicanis_DSM45586","Cfalsenii_DSM44353","Cglutamicum_ATCC13032","Cglycinophilum_AJ3170","Chalotolerans_YIM70093","Chumireducens_DSM45392","Cimitans_DSM44264","Cjeike…	0.145375	0.145375	1.72383	0.145366	0.145366	1.72383	1282	0
ERS451417_01985	1717.62.peg.1985	NA	NA	NA	1	13	Catypicum_R2070,"Caurimucosum_ATCC700975","Cbelfantii_FRC0043","Cdiphtheriae_NCTC11397","Cimitans_DSM44264","Ckutscheri_DSM20755","Cpseudotuberculosis_ATCC19410","Csilvaticum_KL0182","Csimulans_PES1","Csingulare_IBSB52218","Culcerans_NCTC12077","Culcerans_NCTC7910","Cvitaeruminis_DSM20294"	0.156046	0.156046	2.4839	0.156046	0.156046	2.4839	2	1	1. 0.40987;2. 315;3. 943;4. 338;5. 336;6. 1006;7. 361;8. 1081;9. 829;10. A;11. GCA
ERS451417_01357	1717.62.peg.1365	NA	NA	NA	1	17	Catypicum_R2070,"Cbelfantii_FRC0043","Cdiphtheriae_NCTC11397","Cdoosanense_DSM45436","Cepidermidicanis_DSM45586","Cglutamicum_ATCC13032","Chalotolerans_YIM70093","Chumireducens_DSM45392","Cimitans_DSM44264","Cmustelae_DSM45274","Cpseudotuberculosis_31","Cpseudotuberculosis_ATCC19410","Csilvaticum_KL0182","Ctestudinoris_DSM44614","Culcerans_NCTC12077","Culcerans_NCTC7910","Cvitaeruminis_DSM20294"	0.280606	0.280606	1.83178	0.280606	0.280606	1.83178	3330	0
ERS451417_01806	1717.62.peg.1812	NA	NA	NA	1	9	Caurimucosum_ATCC700975,"Cbelfantii_FRC0043","Cdiphtheriae_NCTC11397","Cpseudotuberculosis_31","Cpseudotuberculosis_ATCC19410","Csilvaticum_KL0182","Culcerans_NCTC12077","Culcerans_NCTC7910","Cvitaeruminis_DSM20294"	0.261958	0.261958	2.777	0.261958	0.261958	2.777	2050	3	1. 0.45085;2. 67;3. 199;4. 116;5. 94;6. 280;7. 97;8. 289;9. 133;10. I;11. ATA	1. 0.43694;2. 298;3. 892;4. 451;5. 362;6. 1084;7. 442;8. 1324;9. 616;10. I;11. ATC	1. 0.46878;2. 645;3. 1933;4. 914;5. 736;6. 2206;7. 857;8. 2569;9. 1537;10. E;11. GAA
ERS451417_01573	1717.62.peg.1582	NA	NA	NA	1	38	Cargentoratense_DSM44202,"Catypicum_R2070","Caurimucosum_ATCC700975","Cbelfantii_FRC0043","Ccallunae_DSM20147","Ccamporealensis_DSM44610","Cdeserti_GIMN1010","Cdiphtheriae_NCTC11397","Cdoosanense_DSM45436","Cefficiens_YS314","Cepidermidicanis_DSM45586","Cfalsenii_DSM44353","Cglutamicum_ATCC13032","Cglycinophilum_AJ3170","Chalotolerans_YIM70093","Chumireducens_DSM45392","Cimitans_DSM44264","Cjeike…	0.23656	0.23656	1.58785	0.23656	0.23656	1.58785	3074	2	1. 0.65305;2. 38;3. 112;4. 49;5. 49;6. 145;7. 147;8. 439;9. 25;10. K;11. AAG	1. 0.55858;2. 69;3. 205;4. 81;5. 81;6. 241;7. 182;8. 544;9. 94;10. T;11. ACT
ERS451417_02297	1717.62.peg.2326	NA	NA	NA	1	31	Cargentoratense_DSM44202,"Catypicum_R2070","Cbelfantii_FRC0043","Ccallunae_DSM20147","Cdeserti_GIMN1010","Cdiphtheriae_NCTC11397","Cefficiens_YS314","Cepidermidicanis_DSM45586","Cglutamicum_ATCC13032","Cglycinophilum_AJ3170","Chalotolerans_YIM70093","Chumireducens_DSM45392","Cimitans_DSM44264","Ckroppenstedtii_DSM44385","Ckutscheri_DSM20755","Clactis_RW25","Cmarinum_DSM44953","Cmaris_DSM45190","C…	0.411342	0.149979	1.7521	0.267877	0.149979	1.7521	3330	0
ERS451417_01964	1717.62.peg.1964	NA	NA	NA	1	30	Cargentoratense_DSM44202,"Catypicum_R2070","Caurimucosum_ATCC700975","Cbelfantii_FRC0043","Ccallunae_DSM20147","Cdeserti_GIMN1010","Cdiphtheriae_NCTC11397","Cdoosanense_DSM45436","Cepidermidicanis_DSM45586","Cfalsenii_DSM44353","Cglutamicum_ATCC13032","Cglycinophilum_AJ3170","Chalotolerans_YIM70093","Chumireducens_DSM45392","Cimitans_DSM44264","Cjeikeium_K41","Ckroppenstedtii_DSM44385","Clactis_R…	0.163353	0.163353	1.67946	0.163353	0.163353	1.67946	2	2	1. 0.50658;2. 105;3. 313;4. 120;5. 118;6. 352;7. 135;8. 403;9. 274;10. Q;11. CAA	1. 0.43414;2. 305;3. 913;4. 328;5. 321;6. 961;7. 338;8. 1012;9. 865;10. H;11. CAC
ERS451417_01450	1717.62.peg.1457	NA	NA	NA	1	33	Cargentoratense_DSM44202,"Catypicum_R2070","Caurimucosum_ATCC700975","Cbelfantii_FRC0043","Ccallunae_DSM20147","Ccamporealensis_DSM44610","Cdeserti_GIMN1010","Cdiphtheriae_NCTC11397","Cdoosanense_DSM45436","Cefficiens_YS314","Cepidermidicanis_DSM45586","Cglutamicum_ATCC13032","Cglycinophilum_AJ3170","Chalotolerans_YIM70093","Chumireducens_DSM45392","Cimitans_DSM44264","Ckroppenstedtii_DSM44385","…	0.184589	0.184589	2.02331	0.184589	0.184589	2.02331	258	0
ERS451417_01581	1717.62.peg.1590	NA	NA	NA	1	29	Catypicum_R2070,"Caurimucosum_ATCC700975","Cbelfantii_FRC0043","Ccallunae_DSM20147","Ccamporealensis_DSM44610","Cdeserti_GIMN1010","Cdiphtheriae_NCTC11397","Cdoosanense_DSM45436","Cefficiens_YS314","Cepidermidicanis_DSM45586","Cglutamicum_ATCC13032","Chalotolerans_YIM70093","Chumireducens_DSM45392","Ckutscheri_DSM20755","Cmarinum_DSM44953","Cmaris_DSM45190","Cmustelae_DSM45274","Cpseudotuberculos…	0.223501	0.223501	1.63239	0.223501	0.223501	1.63239	3330	0
ERS451417_01633	1717.62.peg.1640	NA	NA	NA	1	10	Cbelfantii_FRC0043,"Cdiphtheriae_NCTC11397","Cefficiens_YS314","Cmustelae_DSM45274","Cpseudotuberculosis_31","Cpseudotuberculosis_ATCC19410","Csilvaticum_KL0182","Culcerans_NCTC12077","Culcerans_NCTC7910","Cvitaeruminis_DSM20294"	0.381628	0.365239	3.75827	0.365239	0.365239	3.75829	258	0
ERS451417_01451	1717.62.peg.1458	NA	NA	NA	1	10	Cbelfantii_FRC0043,"Cdiphtheriae_NCTC11397","Ckutscheri_DSM20755","Cmustelae_DSM45274","Cpseudotuberculosis_31","Cpseudotuberculosis_ATCC19410","Csilvaticum_KL0182","Culcerans_NCTC12077","Culcerans_NCTC7910","Cvitaeruminis_DSM20294"	0.138954	0.138954	2.45689	0.138954	0.138954	2.45689	258	0
ERS451417_00318	1717.62.peg.320	NA	NA	NA	1	39	Cargentoratense_DSM44202,"Catypicum_R2070","Caurimucosum_ATCC700975","Cbelfantii_FRC0043","Ccallunae_DSM20147","Ccamporealensis_DSM44610","Cdeserti_GIMN1010","Cdiphtheriae_NCTC11397","Cdoosanense_DSM45436","Cefficiens_YS314","Cepidermidicanis_DSM45586","Cfalsenii_DSM44353","Cglutamicum_ATCC13032","Cglycinophilum_AJ3170","Chalotolerans_YIM70093","Chumireducens_DSM45392","Cimitans_DSM44264","Cjeike…	0.02542	0.02542	1.63754	0.02542	0.02542	1.63754	258	0
ERS451417_02267	1717.62.peg.2296	NA	NA	NA	1	11	Cbelfantii_FRC0043,"Cdiphtheriae_NCTC11397","Cepidermidicanis_DSM45586","Ckutscheri_DSM20755","Cpseudotuberculosis_31","Cpseudotuberculosis_ATCC19410","Csilvaticum_KL0182","Ctestudinoris_DSM44614","Culcerans_NCTC12077","Culcerans_NCTC7910","Cvitaeruminis_DSM20294"	0.395378	0.236311	2.23494	0.395378	0.236311	2.23494	2	3	1. 0.46486;2. 75;3. 223;4. 200;5. 84;6. 250;7. 87;8. 259;9. 175;10. E;11. GAA	1. 0.79857;2. 180;3. 538;4. 339;5. 195;6. 583;7. 200;8. 598;9. 448;10. L;11. CTC	1. 0.44417;2. 191;3. 571;4. 350;5. 206;6. 616;7. 211;8. 631;9. 481;10. V;11. GTC
ERS451417_00487	1717.62.peg.490	NA	NA	NA	1	17	Cbelfantii_FRC0043,"Ccallunae_DSM20147","Cdeserti_GIMN1010","Cdiphtheriae_NCTC11397","Cglutamicum_ATCC13032","Chalotolerans_YIM70093","Chumireducens_DSM45392","Cmarinum_DSM44953","Cmaris_DSM45190","Cpseudotuberculosis_31","Cpseudotuberculosis_ATCC19410","Crouxii_FRC0190","Csilvaticum_KL0182","Ctestudinoris_DSM44614","Culcerans_NCTC12077","Culcerans_NCTC7910","Cvitaeruminis_DSM20294"	0.312686	0.312686	2.44785	0.312686	0.312686	2.44787	258	0
ERS451417_01998	1717.62.peg.2002	NA	NA	NA	1	7	Cbelfantii_FRC0043,"Cdiphtheriae_NCTC11397","Cpseudotuberculosis_31","Cpseudotuberculosis_ATCC19410","Csilvaticum_KL0182","Culcerans_NCTC12077","Culcerans_NCTC7910"	0.396404	0.309309	4.86263	0.396404	0.309309	4.86263	2	2	1. 0.69163;2. 348;3. 1042;4. 349;5. 349;6. 1045;7. 349;8. 1045;9. 1027;10. F;11. TTC	1. 0.6692;2. 362;3. 1084;4. 363;5. 363;6. 1087;7. 363;8. 1087;9. 1069;10. G;11. GGC
ERS451417_02308	1717.62.peg.2335	NA	NA	NA	1	38	Cargentoratense_DSM44202,"Catypicum_R2070","Caurimucosum_ATCC700975","Cbelfantii_FRC0043","Ccallunae_DSM20147","Ccamporealensis_DSM44610","Cdeserti_GIMN1010","Cdiphtheriae_NCTC11397","Cdoosanense_DSM45436","Cefficiens_YS314","Cepidermidicanis_DSM45586","Cfalsenii_DSM44353","Cglutamicum_ATCC13032","Cglycinophilum_AJ3170","Chalotolerans_YIM70093","Chumireducens_DSM45392","Cimitans_DSM44264","Cjeike…	0.107086	0.107086	1.63465	0.107086	0.107086	1.63465	3330	0
ERS451417_00068	1717.62.peg.64	NA	NA	NA	1	16	Cbelfantii_FRC0043,"Ccallunae_DSM20147","Cdiphtheriae_NCTC11397","Cdoosanense_DSM45436","Chalotolerans_YIM70093","Chumireducens_DSM45392","Cmarinum_DSM44953","Cmaris_DSM45190","Cpseudotuberculosis_31","Cpseudotuberculosis_ATCC19410","Crouxii_FRC0190","Csilvaticum_KL0182","Ctestudinoris_DSM44614","Culcerans_NCTC12077","Culcerans_NCTC7910","Cvitaeruminis_DSM20294"	0.149034	0.149034	1.63664	0.149034	0.149034	1.63664	258	0
ERS451417_00984	1717.62.peg.995	NA	NA	NA	1	7	Cbelfantii_FRC0043,"Cdiphtheriae_NCTC11397","Cpseudotuberculosis_31","Cpseudotuberculosis_ATCC19410","Crouxii_FRC0190","Culcerans_NCTC12077","Culcerans_NCTC7910"	0.490542	0.296668	3.36234	0.499417	0.297684	3.38496	2	4	1. 0.79894;2. 118;3. 352;4. 143;5. 119;6. 355;7. 118;8. 352;9. 316;10. T;11. ACT	1. 0.57783;2. 164;3. 490;4. 192;5. 165;6. 493;7. 164;8. 490;9. 454;10. Q;11. CAG	1. 0.72352;2. 217;3. 649;4. 245;5. 218;6. 652;7. 217;8. 649;9. 613;10. S;11. AGC	1. 0.42861;2. 324;3. 970;4. 420;5. 325;6. 973;7. 333;8. 997;9. 799;10. L;11. CTT
ERS451417_01996	1717.62.peg.2000	NA	NA	NA	1	7	Cbelfantii_FRC0043,"Cdiphtheriae_NCTC11397","Cpseudotuberculosis_31","Cpseudotuberculosis_ATCC19410","Csilvaticum_KL0182","Culcerans_NCTC12077","Culcerans_NCTC7910"	0.323259	0.323259	5.06851	0.323259	0.323259	5.0685	2	1	1. 0.46088;2. 210;3. 628;4. 223;5. 223;6. 667;7. 224;8. 670;9. 508;10. N;11. AAT
ERS451417_01489	1717.62.peg.1497	NA	NA	NA	1	38	Cargentoratense_DSM44202,"Catypicum_R2070","Caurimucosum_ATCC700975","Cbelfantii_FRC0043","Ccallunae_DSM20147","Ccamporealensis_DSM44610","Cdeserti_GIMN1010","Cdiphtheriae_NCTC11397","Cdoosanense_DSM45436","Cefficiens_YS314","Cepidermidicanis_DSM45586","Cfalsenii_DSM44353","Cglutamicum_ATCC13032","Cglycinophilum_AJ3170","Chalotolerans_YIM70093","Chumireducens_DSM45392","Cimitans_DSM44264","Cjeike…	0.224119	0.224119	1.69925	0.224119	0.224119	1.69925	258	0
ERS451417_01651	1717.62.peg.1658	NA	NA	NA	1	37	Cargentoratense_DSM44202,"Catypicum_R2070","Caurimucosum_ATCC700975","Cbelfantii_FRC0043","Ccallunae_DSM20147","Ccamporealensis_DSM44610","Cdeserti_GIMN1010","Cdiphtheriae_NCTC11397","Cdoosanense_DSM45436","Cepidermidicanis_DSM45586","Cfalsenii_DSM44353","Cglutamicum_ATCC13032","Cglycinophilum_AJ3170","Chalotolerans_YIM70093","Chumireducens_DSM45392","Cimitans_DSM44264","Cjeikeium_K41","Ckroppens…	0.522443	0.178025	1.56731	0.300788	0.178025	1.56731	2306	0
ERS451417_01431	1717.62.peg.1437	NA	NA	NA	1	38	Cargentoratense_DSM44202,"Catypicum_R2070","Caurimucosum_ATCC700975","Cbelfantii_FRC0043","Ccallunae_DSM20147","Ccamporealensis_DSM44610","Cdeserti_GIMN1010","Cdiphtheriae_NCTC11397","Cdoosanense_DSM45436","Cefficiens_YS314","Cepidermidicanis_DSM45586","Cfalsenii_DSM44353","Cglutamicum_ATCC13032","Cglycinophilum_AJ3170","Chalotolerans_YIM70093","Chumireducens_DSM45392","Cimitans_DSM44264","Cjeike…	0.067254	0.067254	1.39391	0.067254	0.067254	1.39391	1282	0
ERS451417_01295	1717.62.peg.1303	NA	NA	NA	1	38	Cargentoratense_DSM44202,"Catypicum_R2070","Caurimucosum_ATCC700975","Cbelfantii_FRC0043","Ccallunae_DSM20147","Ccamporealensis_DSM44610","Cdeserti_GIMN1010","Cdiphtheriae_NCTC11397","Cdoosanense_DSM45436","Cefficiens_YS314","Cepidermidicanis_DSM45586","Cfalsenii_DSM44353","Cglutamicum_ATCC13032","Cglycinophilum_AJ3170","Chalotolerans_YIM70093","Chumireducens_DSM45392","Cimitans_DSM44264","Cjeike…	0.076441	0.076441	1.62467	0.076441	0.076441	1.62466	258	0
ERS451417_00887	1717.62.peg.893	NA	NA	NA	1	30	Catypicum_R2070,"Caurimucosum_ATCC700975","Cbelfantii_FRC0043","Ccallunae_DSM20147","Ccamporealensis_DSM44610","Cdeserti_GIMN1010","Cdiphtheriae_NCTC11397","Cdoosanense_DSM45436","Cefficiens_YS314","Cglutamicum_ATCC13032","Chalotolerans_YIM70093","Chumireducens_DSM45392","Cimitans_DSM44264","Ckroppenstedtii_DSM44385","Ckutscheri_DSM20755","Clactis_RW25","Cmarinum_DSM44953","Cmaris_DSM45190","Cmus…	0.18867	0.18867	1.99383	0.18867	0.18867	1.99383	2	1	1. 0.45991;2. 205;3. 613;4. 235;5. 235;6. 703;7. 307;8. 919;9. 568;10. E;11. GAG
ERS451417_02138	1717.62.peg.2158	NA	NA	NA	1	6	Cbelfantii_FRC0043,"Cdiphtheriae_NCTC11397","Cpseudotuberculosis_31","Cpseudotuberculosis_ATCC19410","Culcerans_NCTC12077","Culcerans_NCTC7910"	0.446393	0.23672	2.67267	0.446393	0.23672	2.67267	2	5	1. 0.64699;2. 135;3. 403;4. 292;5. 136;6. 406;7. 138;8. 412;9. 403;10. K;11. AAA	1. 0.72423;2. 151;3. 451;4. 353;5. 152;6. 454;7. 154;8. 460;9. 433;10. H;11. CAC	1. 0.80668;2. 152;3. 454;4. 354;5. 153;6. 457;7. 155;8. 463;9. 436;10. L;11. CTC	1. 0.70564;2. 176;3. 526;4. 386;5. 177;6. 529;7. 179;8. 535;9. 508;10. I;11. ATC	1. 0.78156;2. 363;3. 1087;4. 649;5. 364;6. 1090;7. 368;8. 1102;9. 1042;10. A;11. GCA
ERS451417_00907	1717.62.peg.913	NA	NA	NA	1	20	Cargentoratense_DSM44202,"Cbelfantii_FRC0043","Ccallunae_DSM20147","Cdeserti_GIMN1010","Cdiphtheriae_NCTC11397","Cefficiens_YS314","Cepidermidicanis_DSM45586","Cglutamicum_ATCC13032","Chalotolerans_YIM70093","Chumireducens_DSM45392","Cmarinum_DSM44953","Cmaris_DSM45190","Cpseudotuberculosis_31","Cpseudotuberculosis_ATCC19410","Crouxii_FRC0190","Csilvaticum_KL0182","Ctestudinoris_DSM44614","Culcer…	0.204212	0.204193	1.93498	0.204203	0.204194	1.93498	3330	0
ERS451417_01022	1717.62.peg.1035	NA	NA	NA	1	39	Cargentoratense_DSM44202,"Catypicum_R2070","Caurimucosum_ATCC700975","Cbelfantii_FRC0043","Ccallunae_DSM20147","Ccamporealensis_DSM44610","Cdeserti_GIMN1010","Cdiphtheriae_NCTC11397","Cdoosanense_DSM45436","Cefficiens_YS314","Cepidermidicanis_DSM45586","Cfalsenii_DSM44353","Cglutamicum_ATCC13032","Cglycinophilum_AJ3170","Chalotolerans_YIM70093","Chumireducens_DSM45392","Cimitans_DSM44264","Cjeike…	0.0863729	0.0863729	1.82305	0.0863729	0.0863729	1.82305	2306	0
ERS451417_00124	1717.62.peg.122	NA	NA	NA	1	14	Cbelfantii_FRC0043,"Ccallunae_DSM20147","Cdiphtheriae_NCTC11397","Cdoosanense_DSM45436","Cefficiens_YS314","Ckroppenstedtii_DSM44385","Ckutscheri_DSM20755","Cpseudotuberculosis_31","Cpseudotuberculosis_ATCC19410","Crouxii_FRC0190","Csilvaticum_KL0182","Culcerans_NCTC12077","Culcerans_NCTC7910","Cvitaeruminis_DSM20294"	0.141794	0.141794	2.17844	0.141786	0.141786	2.17844	3330	0
ERS451417_01869	1717.62.peg.1871	NA	NA	NA	1	38	Cargentoratense_DSM44202,"Catypicum_R2070","Caurimucosum_ATCC700975","Cbelfantii_FRC0043","Ccallunae_DSM20147","Ccamporealensis_DSM44610","Cdeserti_GIMN1010","Cdiphtheriae_NCTC11397","Cdoosanense_DSM45436","Cefficiens_YS314","Cepidermidicanis_DSM45586","Cfalsenii_DSM44353","Cglutamicum_ATCC13032","Cglycinophilum_AJ3170","Chalotolerans_YIM70093","Chumireducens_DSM45392","Cimitans_DSM44264","Cjeike…	0.152881	0.152881	1.34424	0.152881	0.152881	1.34424	2306	0
ERS451417_00671	1717.62.peg.678	NA	NA	NA	1	16	Cargentoratense_DSM44202,"Cbelfantii_FRC0043","Cdiphtheriae_NCTC11397","Cefficiens_YS314","Cepidermidicanis_DSM45586","Ckroppenstedtii_DSM44385","Ckutscheri_DSM20755","Clactis_RW25","Cmustelae_DSM45274","Cpseudotuberculosis_31","Cpseudotuberculosis_ATCC19410","Crouxii_FRC0190","Csilvaticum_KL0182","Culcerans_NCTC12077","Culcerans_NCTC7910","Cvitaeruminis_DSM20294"	0.0908722	0.0908722	2.74175	0.0908722	0.0908722	2.74175	258	0
ERS451417_00094	1717.62.peg.92	NA	NA	NA	1	11	Cbelfantii_FRC0043,"Cdiphtheriae_NCTC11397","Ckutscheri_DSM20755","Cmustelae_DSM45274","Cpseudotuberculosis_31","Cpseudotuberculosis_ATCC19410","Crouxii_FRC0190","Csilvaticum_KL0182","Culcerans_NCTC12077","Culcerans_NCTC7910","Cvitaeruminis_DSM20294"	0.135887	0.135887	2.86227	0.135887	0.135887	2.86227	2306	0
ERS451417_00960	1717.62.peg.967	NA	NA	NA	1	39	Cargentoratense_DSM44202,"Catypicum_R2070","Caurimucosum_ATCC700975","Cbelfantii_FRC0043","Ccallunae_DSM20147","Ccamporealensis_DSM44610","Cdeserti_GIMN1010","Cdiphtheriae_NCTC11397","Cdoosanense_DSM45436","Cefficiens_YS314","Cepidermidicanis_DSM45586","Cfalsenii_DSM44353","Cglutamicum_ATCC13032","Cglycinophilum_AJ3170","Chalotolerans_YIM70093","Chumireducens_DSM45392","Cimitans_DSM44264","Cjeike…	0.15845	0.156365	1.70422	0.156421	0.156421	1.70632	258	0
ERS451417_01676	1717.62.peg.1683	NA	NA	NA	1	33	Catypicum_R2070,"Caurimucosum_ATCC700975","Cbelfantii_FRC0043","Ccallunae_DSM20147","Ccamporealensis_DSM44610","Cdeserti_GIMN1010","Cdiphtheriae_NCTC11397","Cdoosanense_DSM45436","Cefficiens_YS314","Cglutamicum_ATCC13032","Chalotolerans_YIM70093","Chumireducens_DSM45392","Cimitans_DSM44264","Ckroppenstedtii_DSM44385","Ckutscheri_DSM20755","Clactis_RW25","Cmarinum_DSM44953","Cmaris_DSM45190","Cmus…	0.196748	0.196748	1.64504	0.196748	0.196748	1.64503	1282	0
ERS451417_02135	1717.62.peg.2155	NA	NA	NA	1	7	Cbelfantii_FRC0043,"Cdiphtheriae_NCTC11397","Cpseudotuberculosis_31","Cpseudotuberculosis_ATCC19410","Csilvaticum_KL0182","Culcerans_NCTC12077","Culcerans_NCTC7910"	0.0965614	0.0965614	2.79045	0.0965614	0.0965614	2.79045	258	0
ERS451417_00188	1717.62.peg.184	NA	NA	NA	1	39	Cargentoratense_DSM44202,"Catypicum_R2070","Caurimucosum_ATCC700975","Cbelfantii_FRC0043","Ccallunae_DSM20147","Ccamporealensis_DSM44610","Cdeserti_GIMN1010","Cdiphtheriae_NCTC11397","Cdoosanense_DSM45436","Cefficiens_YS314","Cepidermidicanis_DSM45586","Cfalsenii_DSM44353","Cglutamicum_ATCC13032","Cglycinophilum_AJ3170","Chalotolerans_YIM70093","Chumireducens_DSM45392","Cimitans_DSM44264","Cjeike…	0.162653	0.147277	1.86487	0.162653	0.147277	1.86487	2	3	1. 0.54937;2. 326;3. 976;4. 346;5. 346;6. 1036;7. 362;8. 1084;9. 904;10. M;11. ATG	1. 0.57215;2. 574;3. 1720;4. 602;5. 602;6. 1804;7. 642;8. 1924;9. 1555;10. V;11. GTT	1. 0.52655;2. 579;3. 1735;4. 607;5. 607;6. 1819;7. 647;8. 1939;9. 1570;10. F;11. TTC
ERS451417_00448	1717.62.peg.451	NA	NA	NA	1	17	Cbelfantii_FRC0043,"Ccallunae_DSM20147","Ccamporealensis_DSM44610","Cdeserti_GIMN1010","Cdiphtheriae_NCTC11397","Cepidermidicanis_DSM45586","Cglutamicum_ATCC13032","Ckutscheri_DSM20755","Cmustelae_DSM45274","Cpseudotuberculosis_31","Cpseudotuberculosis_ATCC19410","Crouxii_FRC0190","Csilvaticum_KL0182","Ctestudinoris_DSM44614","Culcerans_NCTC12077","Culcerans_NCTC7910","Cuterequi_DSM45634"	0.123487	0.123487	2.19058	0.123487	0.123487	2.19057	258	0
ERS451417_02226	1717.62.peg.2251	NA	NA	NA	1	6	Cbelfantii_FRC0043,"Cdiphtheriae_NCTC11397","Cpseudotuberculosis_31","Cpseudotuberculosis_ATCC19410","Culcerans_NCTC12077","Culcerans_NCTC7910"	0.148691	0.148691	2.61824	0.148691	0.148691	2.61824	258	0
ERS451417_00944	1717.62.peg.951	NA	NA	NA	1	39	Cargentoratense_DSM44202,"Catypicum_R2070","Caurimucosum_ATCC700975","Cbelfantii_FRC0043","Ccallunae_DSM20147","Ccamporealensis_DSM44610","Cdeserti_GIMN1010","Cdiphtheriae_NCTC11397","Cdoosanense_DSM45436","Cefficiens_YS314","Cepidermidicanis_DSM45586","Cfalsenii_DSM44353","Cglutamicum_ATCC13032","Cglycinophilum_AJ3170","Chalotolerans_YIM70093","Chumireducens_DSM45392","Cimitans_DSM44264","Cjeike…	0.163295	0.163295	1.64797	0.163295	0.163295	1.64797	258	0
ERS451417_00463	1717.62.peg.467	NA	NA	NA	1	20	Catypicum_R2070,"Caurimucosum_ATCC700975","Cbelfantii_FRC0043","Ccamporealensis_DSM44610","Cdiphtheriae_NCTC11397","Cdoosanense_DSM45436","Cfalsenii_DSM44353","Chalotolerans_YIM70093","Chumireducens_DSM45392","Cimitans_DSM44264","Cmaris_DSM45190","Cmustelae_DSM45274","Cpseudotuberculosis_ATCC19410","Crouxii_FRC0190","Csilvaticum_KL0182","Csimulans_PES1","Csingulare_IBSB52218","Culcerans_NCTC12077…	0.210655	0.210655	1.79795	0.210655	0.210655	1.79795	2	2	1. 0.58387;2. 134;3. 400;4. 150;5. 146;6. 436;7. 151;8. 451;9. 355;10. A;11. GCC	1. 0.56393;2. 142;3. 424;4. 158;5. 154;6. 460;7. 159;8. 475;9. 379;10. S;11. TCA
ERS451417_00672	1717.62.peg.679	NA	NA	NA	1	15	Cargentoratense_DSM44202,"Cbelfantii_FRC0043","Cdiphtheriae_NCTC11397","Cefficiens_YS314","Cepidermidicanis_DSM45586","Ckutscheri_DSM20755","Clactis_RW25","Cmustelae_DSM45274","Cpseudotuberculosis_31","Cpseudotuberculosis_ATCC19410","Crouxii_FRC0190","Csilvaticum_KL0182","Culcerans_NCTC12077","Culcerans_NCTC7910","Cvitaeruminis_DSM20294"	0.21193	0.21193	2.17226	0.21193	0.21193	2.17225	258	0
ERS451417_00467	1717.62.peg.471	NA	NA	NA	1	10	Cbelfantii_FRC0043,"Cdiphtheriae_NCTC11397","Ckutscheri_DSM20755","Cpseudotuberculosis_31","Cpseudotuberculosis_ATCC19410","Crouxii_FRC0190","Csilvaticum_KL0182","Culcerans_NCTC12077","Culcerans_NCTC7910","Cvitaeruminis_DSM20294"	0.0987479	0.0987479	1.81922	0.0987386	0.0987386	1.81919	2	2	1. 0.59351;2. 287;3. 859;4. 308;5. 297;6. 889;7. 314;8. 940;9. 769;10. D;11. GAT	1. 0.59743;2. 394;3. 1180;4. 416;5. 404;6. 1210;7. 421;8. 1261;9. 1090;10. V;11. GTT
ERS451417_01660	1717.62.peg.1667	NA	NA	NA	1	38	Cargentoratense_DSM44202,"Catypicum_R2070","Caurimucosum_ATCC700975","Cbelfantii_FRC0043","Ccallunae_DSM20147","Ccamporealensis_DSM44610","Cdeserti_GIMN1010","Cdiphtheriae_NCTC11397","Cdoosanense_DSM45436","Cefficiens_YS314","Cepidermidicanis_DSM45586","Cfalsenii_DSM44353","Cglutamicum_ATCC13032","Cglycinophilum_AJ3170","Chalotolerans_YIM70093","Chumireducens_DSM45392","Cimitans_DSM44264","Cjeike…	0.207325	0.207325	1.61256	0.207325	0.207325	1.61256	258	0
ERS451417_00815	1717.62.peg.821	NA	NA	NA	1	31	Catypicum_R2070,"Caurimucosum_ATCC700975","Cbelfantii_FRC0043","Ccallunae_DSM20147","Ccamporealensis_DSM44610","Cdeserti_GIMN1010","Cdiphtheriae_NCTC11397","Cefficiens_YS314","Cepidermidicanis_DSM45586","Cfalsenii_DSM44353","Cglutamicum_ATCC13032","Cglycinophilum_AJ3170","Chalotolerans_YIM70093","Chumireducens_DSM45392","Cimitans_DSM44264","Cjeikeium_K41","Cmarinum_DSM44953","Cmustelae_DSM45274",…	0.129117	0.129117	1.92415	0.129117	0.129117	1.92415	3330	0
ERS451417_00759	1717.62.peg.764	NA	NA	NA	1	36	Cargentoratense_DSM44202,"Caurimucosum_ATCC700975","Cbelfantii_FRC0043","Ccallunae_DSM20147","Ccamporealensis_DSM44610","Cdeserti_GIMN1010","Cdiphtheriae_NCTC11397","Cdoosanense_DSM45436","Cefficiens_YS314","Cepidermidicanis_DSM45586","Cfalsenii_DSM44353","Cglutamicum_ATCC13032","Cglycinophilum_AJ3170","Chalotolerans_YIM70093","Chumireducens_DSM45392","Cimitans_DSM44264","Cjeikeium_K41","Ckutsche…	0.142309	0.142309	1.78418	0.142309	0.142309	1.78418	3330	0
ERS451417_01872	1717.62.peg.1874	NA	NA	NA	1	38	Cargentoratense_DSM44202,"Catypicum_R2070","Caurimucosum_ATCC700975","Cbelfantii_FRC0043","Ccallunae_DSM20147","Ccamporealensis_DSM44610","Cdeserti_GIMN1010","Cdiphtheriae_NCTC11397","Cdoosanense_DSM45436","Cefficiens_YS314","Cepidermidicanis_DSM45586","Cfalsenii_DSM44353","Cglutamicum_ATCC13032","Cglycinophilum_AJ3170","Chalotolerans_YIM70093","Chumireducens_DSM45392","Cimitans_DSM44264","Cjeike…	0.378272	0.0844821	7.37219	0.190083	0.0844822	7.37219	258	0
ERS451417_00829	1717.62.peg.833	NA	NA	NA	1	39	Cargentoratense_DSM44202,"Catypicum_R2070","Caurimucosum_ATCC700975","Cbelfantii_FRC0043","Ccallunae_DSM20147","Ccamporealensis_DSM44610","Cdeserti_GIMN1010","Cdiphtheriae_NCTC11397","Cdoosanense_DSM45436","Cefficiens_YS314","Cepidermidicanis_DSM45586","Cfalsenii_DSM44353","Cglutamicum_ATCC13032","Cglycinophilum_AJ3170","Chalotolerans_YIM70093","Chumireducens_DSM45392","Cimitans_DSM44264","Cjeike…	0.0872074	0.0872074	1.58476	0.0871977	0.0871977	1.58477	258	0
ERS451417_02326	1717.62.peg.2353	NA	NA	NA	1	7	Cbelfantii_FRC0043,"Cdiphtheriae_NCTC11397","Cpseudotuberculosis_31","Cpseudotuberculosis_ATCC19410","Csilvaticum_KL0182","Culcerans_NCTC12077","Culcerans_NCTC7910"	0.0409915	0.0409915	3.25439	0.0409915	0.0409915	3.25439	258	0
ERS451417_00712	1717.62.peg.717	NA	NA	NA	1	39	Cargentoratense_DSM44202,"Catypicum_R2070","Caurimucosum_ATCC700975","Cbelfantii_FRC0043","Ccallunae_DSM20147","Ccamporealensis_DSM44610","Cdeserti_GIMN1010","Cdiphtheriae_NCTC11397","Cdoosanense_DSM45436","Cefficiens_YS314","Cepidermidicanis_DSM45586","Cfalsenii_DSM44353","Cglutamicum_ATCC13032","Cglycinophilum_AJ3170","Chalotolerans_YIM70093","Chumireducens_DSM45392","Cimitans_DSM44264","Cjeike…	0.193407	0.159163	1.49335	0.193407	0.159163	1.49335	2	3	1. 0.62025;2. 224;3. 670;4. 267;5. 267;6. 799;7. 335;8. 1003;9. 526;10. D;11. GAC	1. 0.5414;2. 300;3. 898;4. 343;5. 343;6. 1027;7. 411;8. 1231;9. 754;10. D;11. GAT	1. 0.59531;2. 328;3. 982;4. 371;5. 371;6. 1111;7. 439;8. 1315;9. 838;10. A;11. GCC
ERS451417_00861	1717.62.peg.866	NA	NA	NA	1	31	Cargentoratense_DSM44202,"Catypicum_R2070","Caurimucosum_ATCC700975","Cbelfantii_FRC0043","Ccallunae_DSM20147","Ccamporealensis_DSM44610","Cdeserti_GIMN1010","Cdiphtheriae_NCTC11397","Cdoosanense_DSM45436","Cefficiens_YS314","Cepidermidicanis_DSM45586","Cfalsenii_DSM44353","Cglutamicum_ATCC13032","Cglycinophilum_AJ3170","Chumireducens_DSM45392","Cimitans_DSM44264","Ckroppenstedtii_DSM44385","Ckut…	0.105454	0.105454	1.88655	0.105454	0.105454	1.88655	258	0
ERS451417_00877	1717.62.peg.883	NA	NA	NA	1	39	Cargentoratense_DSM44202,"Catypicum_R2070","Caurimucosum_ATCC700975","Cbelfantii_FRC0043","Ccallunae_DSM20147","Ccamporealensis_DSM44610","Cdeserti_GIMN1010","Cdiphtheriae_NCTC11397","Cdoosanense_DSM45436","Cefficiens_YS314","Cepidermidicanis_DSM45586","Cfalsenii_DSM44353","Cglutamicum_ATCC13032","Cglycinophilum_AJ3170","Chalotolerans_YIM70093","Chumireducens_DSM45392","Cimitans_DSM44264","Cjeike…	0.159929	0.159929	1.74737	0.159929	0.159929	1.74737	3074	3	1. 0.58033;2. 255;3. 763;4. 296;5. 296;6. 886;7. 350;8. 1048;9. 541;10. V;11. GTC	1. 0.56303;2. 324;3. 970;4. 368;5. 368;6. 1102;7. 423;8. 1267;9. 724;10. S;11. TCT	1. 0.43309;2. 342;3. 1024;4. 386;5. 386;6. 1156;7. 441;8. 1321;9. 778;10. F;11. TTC
ERS451417_00577	1717.62.peg.580	NA	NA	NA	1	38	Cargentoratense_DSM44202,"Catypicum_R2070","Caurimucosum_ATCC700975","Cbelfantii_FRC0043","Ccallunae_DSM20147","Ccamporealensis_DSM44610","Cdeserti_GIMN1010","Cdiphtheriae_NCTC11397","Cdoosanense_DSM45436","Cefficiens_YS314","Cepidermidicanis_DSM45586","Cfalsenii_DSM44353","Cglutamicum_ATCC13032","Cglycinophilum_AJ3170","Chalotolerans_YIM70093","Chumireducens_DSM45392","Cimitans_DSM44264","Cjeike…	0.175632	0.175632	1.67578	0.175632	0.175632	1.67578	3074	2	1. 0.43081;2. 192;3. 574;4. 247;5. 247;6. 739;7. 334;8. 1000;9. 367;10. V;11. GTA	1. 0.54998;2. 284;3. 850;4. 339;5. 339;6. 1015;7. 426;8. 1276;9. 643;10. P;11. CCT
ERS451417_01207	1717.62.peg.1215	NA	NA	NA	1	8	Cbelfantii_FRC0043,"Cdiphtheriae_NCTC11397","Cpseudotuberculosis_31","Cpseudotuberculosis_ATCC19410","Crouxii_FRC0190","Csilvaticum_KL0182","Culcerans_NCTC12077","Culcerans_NCTC7910"	0.350336	0.350336	3.50995	0.350336	0.350336	3.50995	258	0
ERS451417_02210	1717.62.peg.2234	NA	NA	NA	1	38	Cargentoratense_DSM44202,"Catypicum_R2070","Caurimucosum_ATCC700975","Cbelfantii_FRC0043","Ccallunae_DSM20147","Ccamporealensis_DSM44610","Cdeserti_GIMN1010","Cdiphtheriae_NCTC11397","Cdoosanense_DSM45436","Cefficiens_YS314","Cepidermidicanis_DSM45586","Cfalsenii_DSM44353","Cglutamicum_ATCC13032","Cglycinophilum_AJ3170","Chalotolerans_YIM70093","Chumireducens_DSM45392","Cimitans_DSM44264","Cjeike…	0.185233	0.185233	1.73154	0.185233	0.185233	1.73155	2	1	1. 0.49325;2. 482;3. 1444;4. 520;5. 520;6. 1558;7. 559;8. 1675;9. 1381;10. I;11. ATT
ERS451417_01891	1717.62.peg.1890	NA	NA	NA	1	38	Cargentoratense_DSM44202,"Catypicum_R2070","Caurimucosum_ATCC700975","Cbelfantii_FRC0043","Ccallunae_DSM20147","Ccamporealensis_DSM44610","Cdeserti_GIMN1010","Cdiphtheriae_NCTC11397","Cdoosanense_DSM45436","Cefficiens_YS314","Cepidermidicanis_DSM45586","Cfalsenii_DSM44353","Cglutamicum_ATCC13032","Cglycinophilum_AJ3170","Chalotolerans_YIM70093","Chumireducens_DSM45392","Cimitans_DSM44264","Cjeike…	0.164415	0.164415	2.04441	0.164415	0.164415	2.04441	258	0
ERS451417_01287	1717.62.peg.1295	NA	NA	NA	1	34	Catypicum_R2070,"Caurimucosum_ATCC700975","Cbelfantii_FRC0043","Ccallunae_DSM20147","Ccamporealensis_DSM44610","Cdiphtheriae_NCTC11397","Cdoosanense_DSM45436","Cefficiens_YS314","Cepidermidicanis_DSM45586","Cfalsenii_DSM44353","Cglutamicum_ATCC13032","Cglycinophilum_AJ3170","Chalotolerans_YIM70093","Cimitans_DSM44264","Cjeikeium_K41","Ckroppenstedtii_DSM44385","Ckutscheri_DSM20755","Clactis_RW25"…	0.15949	0.15475	1.92359	0.15949	0.15475	1.92359	2	2	1. 0.53696;2. 298;3. 892;4. 323;5. 323;6. 967;7. 345;8. 1033;9. 832;10. D;11. GAC	1. 0.55205;2. 376;3. 1126;4. 401;5. 401;6. 1201;7. 423;8. 1267;9. 1066;10. D;11. GAC
ERS451417_00302	1717.62.peg.303	NA	NA	NA	1	22	Catypicum_R2070,"Caurimucosum_ATCC700975","Cbelfantii_FRC0043","Ccamporealensis_DSM44610","Cdiphtheriae_NCTC11397","Cepidermidicanis_DSM45586","Chumireducens_DSM45392","Cimitans_DSM44264","Cmarinum_DSM44953","Cmustelae_DSM45274","Cpseudotuberculosis_31","Cpseudotuberculosis_ATCC19410","CriegeliiPUDD83A45","Crouxii_FRC0190","Csilvaticum_KL0182","Csimulans_PES1","Csingulare_IBSB52218","Ctestudinori…	0.105787	0.105787	2.07503	0.105787	0.105787	2.07503	258	0
ERS451417_01997	1717.62.peg.2001	NA	NA	NA	1	7	Cbelfantii_FRC0043,"Cdiphtheriae_NCTC11397","Cpseudotuberculosis_31","Cpseudotuberculosis_ATCC19410","Csilvaticum_KL0182","Culcerans_NCTC12077","Culcerans_NCTC7910"	0.268801	0.268801	5.85054	0.268801	0.268801	5.85054	258	0
ERS451417_02353	1717.62.peg.2381	NA	NA	NA	1	12	Cbelfantii_FRC0043,"Ccamporealensis_DSM44610","Cdiphtheriae_NCTC11397","Chalotolerans_YIM70093","Chumireducens_DSM45392","Cmarinum_DSM44953","Cpseudotuberculosis_31","Cpseudotuberculosis_ATCC19410","Csilvaticum_KL0182","Culcerans_NCTC12077","Culcerans_NCTC7910","Cvitaeruminis_DSM20294"	0.236867	0.236867	2.52041	0.236867	0.236867	2.52042	3074	2	1. 0.44641;2. 113;3. 337;4. 153;5. 129;6. 385;7. 199;8. 595;9. 79;10. I;11. ATT	1. 0.43424;2. 380;3. 1138;4. 515;5. 401;6. 1201;7. 480;8. 1438;9. 808;10. D;11. GAT
ERS451417_01052	1717.62.peg.1062	NA	NA	NA	1	27	Cargentoratense_DSM44202,"Catypicum_R2070","Cbelfantii_FRC0043","Ccallunae_DSM20147","Cdeserti_GIMN1010","Cdiphtheriae_NCTC11397","Cefficiens_YS314","Cepidermidicanis_DSM45586","Cfalsenii_DSM44353","Cglutamicum_ATCC13032","Cglycinophilum_AJ3170","Chalotolerans_YIM70093","Chumireducens_DSM45392","Cjeikeium_K41","Cmarinum_DSM44953","Cmaris_DSM45190","Cmustelae_DSM45274","Cpseudotuberculosis_31","Cp…	0.340771	0.340771	1.66812	0.340771	0.340771	1.66811	258	0
ERS451417_00516	1717.62.peg.520	NA	NA	NA	1	10	Cbelfantii_FRC0043,"Cdiphtheriae_NCTC11397","Cjeikeium_K41","Clactis_RW25","Cpseudotuberculosis_31","Cpseudotuberculosis_ATCC19410","Crouxii_FRC0190","Csilvaticum_KL0182","Culcerans_NCTC12077","Culcerans_NCTC7910"	0.0432524	0.0432524	2.39989	0.0432524	0.0432524	2.39989	2306	0
ERS451417_00994	1717.62.peg.1005	NA	NA	NA	1	17	Cargentoratense_DSM44202,"Catypicum_R2070","Cbelfantii_FRC0043","Ccallunae_DSM20147","Cdeserti_GIMN1010","Cdiphtheriae_NCTC11397","Cefficiens_YS314","Cglutamicum_ATCC13032","Cglycinophilum_AJ3170","Ckutscheri_DSM20755","Cmustelae_DSM45274","Cpseudotuberculosis_31","Cpseudotuberculosis_ATCC19410","Crouxii_FRC0190","Csilvaticum_KL0182","Cterpenotabidum_Y11","Culcerans_NCTC7910"	0.0970702	0.0970702	2.09324	0.0970702	0.0970702	2.09325	4098	2	1. 0.54832;2. 198;3. 592;4. 237;5. 225;6. 673;7. 251;8. 751;9. 457;10. A;11. GCG	1. 0.44202;2. 309;3. 925;4. 349;5. 337;6. 1009;7. 364;8. 1090;9. 778;10. V;11. GTT
ERS451417_02023	1717.62.peg.2028	NA	NA	NA	1	33	Caurimucosum_ATCC700975,"Cbelfantii_FRC0043","Ccallunae_DSM20147","Ccamporealensis_DSM44610","Cdeserti_GIMN1010","Cdiphtheriae_NCTC11397","Cdoosanense_DSM45436","Cefficiens_YS314","Cepidermidicanis_DSM45586","Cglutamicum_ATCC13032","Cglycinophilum_AJ3170","Chalotolerans_YIM70093","Chumireducens_DSM45392","Cimitans_DSM44264","Cjeikeium_K41","Ckroppenstedtii_DSM44385","Ckutscheri_DSM20755","Clactis…	0.328937	0.328937	1.75808	0.328937	0.328937	1.75808	3330	0
ERS451417_00983	1717.62.peg.994	NA	NA	NA	1	39	Cargentoratense_DSM44202,"Catypicum_R2070","Caurimucosum_ATCC700975","Cbelfantii_FRC0043","Ccallunae_DSM20147","Ccamporealensis_DSM44610","Cdeserti_GIMN1010","Cdiphtheriae_NCTC11397","Cdoosanense_DSM45436","Cefficiens_YS314","Cepidermidicanis_DSM45586","Cfalsenii_DSM44353","Cglutamicum_ATCC13032","Cglycinophilum_AJ3170","Chalotolerans_YIM70093","Chumireducens_DSM45392","Cimitans_DSM44264","Cjeike…	0.156352	0.156352	1.84752	0.156352	0.156352	1.84752	3330	0
ERS451417_00803	1717.62.peg.810	NA	NA	NA	1	39	Cargentoratense_DSM44202,"Catypicum_R2070","Caurimucosum_ATCC700975","Cbelfantii_FRC0043","Ccallunae_DSM20147","Ccamporealensis_DSM44610","Cdeserti_GIMN1010","Cdiphtheriae_NCTC11397","Cdoosanense_DSM45436","Cefficiens_YS314","Cepidermidicanis_DSM45586","Cfalsenii_DSM44353","Cglutamicum_ATCC13032","Cglycinophilum_AJ3170","Chalotolerans_YIM70093","Chumireducens_DSM45392","Cimitans_DSM44264","Cjeike…	0.0776435	0.0776435	2.08109	0.0776435	0.0776435	2.08108	258	0
ERS451417_00236	1717.62.peg.232	NA	NA	NA	1	33	Catypicum_R2070,"Caurimucosum_ATCC700975","Cbelfantii_FRC0043","Ccamporealensis_DSM44610","Cdeserti_GIMN1010","Cdiphtheriae_NCTC11397","Cdoosanense_DSM45436","Cefficiens_YS314","Cepidermidicanis_DSM45586","Cglutamicum_ATCC13032","Cglycinophilum_AJ3170","Chalotolerans_YIM70093","Chumireducens_DSM45392","Cimitans_DSM44264","Ckroppenstedtii_DSM44385","Ckutscheri_DSM20755","Cmarinum_DSM44953","Cmaris…	0.233221	0.233221	1.83787	0.233221	0.233221	1.83787	2306	0
ERS451417_01259	1717.62.peg.1267	NA	NA	NA	1	18	Cargentoratense_DSM44202,"Cbelfantii_FRC0043","Ccallunae_DSM20147","Cdiphtheriae_NCTC11397","Cefficiens_YS314","Cepidermidicanis_DSM45586","Cglutamicum_ATCC13032","Ckroppenstedtii_DSM44385","Ckutscheri_DSM20755","Clactis_RW25","Cmustelae_DSM45274","Cpseudotuberculosis_31","Cpseudotuberculosis_ATCC19410","Crouxii_FRC0190","Csilvaticum_KL0182","Culcerans_NCTC12077","Culcerans_NCTC7910","Cvitaerumin…	0.145887	0.145887	1.99145	0.145887	0.145887	1.99145	2	3	1. 0.56704;2. 158;3. 472;4. 175;5. 164;6. 490;7. 186;8. 556;9. 388;10. I;11. ATC	1. 0.5563;2. 255;3. 763;4. 279;5. 261;6. 781;7. 283;8. 847;9. 679;10. V;11. GTT	1. 0.57892;2. 1053;3. 3157;4. 1125;5. 1101;6. 3301;7. 1192;8. 3574;9. 2857;10. A;11. GCA
ERS451417_02320	1717.62.peg.2347	NA	NA	NA	1	28	Cargentoratense_DSM44202,"Catypicum_R2070","Cbelfantii_FRC0043","Ccallunae_DSM20147","Cdeserti_GIMN1010","Cdiphtheriae_NCTC11397","Cdoosanense_DSM45436","Cefficiens_YS314","Cepidermidicanis_DSM45586","Cglutamicum_ATCC13032","Chalotolerans_YIM70093","Chumireducens_DSM45392","Cimitans_DSM44264","Cjeikeium_K41","Ckutscheri_DSM20755","Cmarinum_DSM44953","Cmaris_DSM45190","Cmustelae_DSM45274","Cpseudo…	0.159544	0.159544	1.64561	0.159544	0.159544	1.64561	1282	0
ERS451417_00989	1717.62.peg.1000	NA	NA	NA	1	39	Cargentoratense_DSM44202,"Catypicum_R2070","Caurimucosum_ATCC700975","Cbelfantii_FRC0043","Ccallunae_DSM20147","Ccamporealensis_DSM44610","Cdeserti_GIMN1010","Cdiphtheriae_NCTC11397","Cdoosanense_DSM45436","Cefficiens_YS314","Cepidermidicanis_DSM45586","Cfalsenii_DSM44353","Cglutamicum_ATCC13032","Cglycinophilum_AJ3170","Chalotolerans_YIM70093","Chumireducens_DSM45392","Cimitans_DSM44264","Cjeike…	0.12504	0.12504	1.73471	0.12504	0.12504	1.73471	258	0
ERS451417_00396	1717.62.peg.396	NA	NA	NA	1	39	Cargentoratense_DSM44202,"Catypicum_R2070","Caurimucosum_ATCC700975","Cbelfantii_FRC0043","Ccallunae_DSM20147","Ccamporealensis_DSM44610","Cdeserti_GIMN1010","Cdiphtheriae_NCTC11397","Cdoosanense_DSM45436","Cefficiens_YS314","Cepidermidicanis_DSM45586","Cfalsenii_DSM44353","Cglutamicum_ATCC13032","Cglycinophilum_AJ3170","Chalotolerans_YIM70093","Chumireducens_DSM45392","Cimitans_DSM44264","Cjeike…	0.175528	0.175528	1.80801	0.175528	0.175528	1.80801	258	0
ERS451417_01760	1717.62.peg.1763	NA	NA	NA	1	29	Cargentoratense_DSM44202,"Caurimucosum_ATCC700975","Cbelfantii_FRC0043","Ccallunae_DSM20147","Ccamporealensis_DSM44610","Cdeserti_GIMN1010","Cdiphtheriae_NCTC11397","Cdoosanense_DSM45436","Cefficiens_YS314","Cepidermidicanis_DSM45586","Cglutamicum_ATCC13032","Chalotolerans_YIM70093","Chumireducens_DSM45392","Cimitans_DSM44264","Ckutscheri_DSM20755","Cmarinum_DSM44953","Cmaris_DSM45190","Cmustelae…	0.0946561	0.0946561	1.69553	0.0946561	0.0946561	1.69553	3330	0
ERS451417_00447	1717.62.peg.450	NA	NA	NA	1	17	Cbelfantii_FRC0043,"Ccallunae_DSM20147","Ccamporealensis_DSM44610","Cdeserti_GIMN1010","Cdiphtheriae_NCTC11397","Cepidermidicanis_DSM45586","Cglutamicum_ATCC13032","Ckutscheri_DSM20755","Cmustelae_DSM45274","Cpseudotuberculosis_31","Cpseudotuberculosis_ATCC19410","Crouxii_FRC0190","Csilvaticum_KL0182","Ctestudinoris_DSM44614","Culcerans_NCTC12077","Culcerans_NCTC7910","Cuterequi_DSM45634"	0.104135	0.104135	2.18488	0.104135	0.104135	2.18489	258	0
ERS451417_01406	1717.62.peg.1419	NA	NA	NA	1	10	Cbelfantii_FRC0043,"Cdiphtheriae_NCTC11397","Ckutscheri_DSM20755","Cmustelae_DSM45274","Cpseudotuberculosis_31","Cpseudotuberculosis_ATCC19410","Csilvaticum_KL0182","Culcerans_NCTC12077","Culcerans_NCTC7910","Cvitaeruminis_DSM20294"	0.141364	0.141364	1.78688	0.141364	0.141364	1.78688	2050	2	1. 0.67504;2. 63;3. 187;4. 105;5. 68;6. 202;7. 73;8. 217;9. 97;10. P;11. CCA	1. 0.51891;2. 130;3. 388;4. 180;5. 135;6. 403;7. 140;8. 418;9. 298;10. L;11. TTG
ERS451417_00311	1717.62.peg.312	NA	NA	NA	1	39	Cargentoratense_DSM44202,"Catypicum_R2070","Caurimucosum_ATCC700975","Cbelfantii_FRC0043","Ccallunae_DSM20147","Ccamporealensis_DSM44610","Cdeserti_GIMN1010","Cdiphtheriae_NCTC11397","Cdoosanense_DSM45436","Cefficiens_YS314","Cepidermidicanis_DSM45586","Cfalsenii_DSM44353","Cglutamicum_ATCC13032","Cglycinophilum_AJ3170","Chalotolerans_YIM70093","Chumireducens_DSM45392","Cimitans_DSM44264","Cjeike…	0.212654	0.212654	1.93981	0.212654	0.212654	1.93981	258	0
ERS451417_00405	1717.62.peg.405	NA	NA	NA	1	39	Cargentoratense_DSM44202,"Catypicum_R2070","Caurimucosum_ATCC700975","Cbelfantii_FRC0043","Ccallunae_DSM20147","Ccamporealensis_DSM44610","Cdeserti_GIMN1010","Cdiphtheriae_NCTC11397","Cdoosanense_DSM45436","Cefficiens_YS314","Cepidermidicanis_DSM45586","Cfalsenii_DSM44353","Cglutamicum_ATCC13032","Cglycinophilum_AJ3170","Chalotolerans_YIM70093","Chumireducens_DSM45392","Cimitans_DSM44264","Cjeike…	0.40375	0.156677	2.80993	0.268976	0.156666	2.80993	258	0
ERS451417_02284	1717.62.peg.2313	NA	NA	NA	1	16	Catypicum_R2070,"Caurimucosum_ATCC700975","Cbelfantii_FRC0043","Cdiphtheriae_NCTC11397","Ckutscheri_DSM20755","Clactis_RW25","Cpseudotuberculosis_31","Cpseudotuberculosis_ATCC19410","CriegeliiPUDD83A45","Csilvaticum_KL0182","Csimulans_PES1","Csingulare_IBSB52218","Culcerans_NCTC12077","Culcerans_NCTC7910","Curealyticum_DSM7109","Cuterequi_DSM45634"	0.171699	0.171699	2.62149	0.171699	0.171699	2.62147	3074	1	1. 0.46523;2. 29;3. 85;4. 45;5. 45;6. 133;7. 51;8. 151;9. 4;10. E;11. GAG
ERS451417_00394	1717.62.peg.394	NA	NA	NA	1	19	Cbelfantii_FRC0043,"Ccamporealensis_DSM44610","Cdiphtheriae_NCTC11397","Chalotolerans_YIM70093","Chumireducens_DSM45392","Cjeikeium_K41","Ckutscheri_DSM20755","Cmarinum_DSM44953","Cmaris_DSM45190","Cmustelae_DSM45274","Crouxii_FRC0190","Csilvaticum_KL0182","Csimulans_PES1","Csingulare_IBSB52218","Ctestudinoris_DSM44614","Culcerans_NCTC12077","Culcerans_NCTC7910","Curealyticum_DSM7109","Cvitaerumi…	0.0739349	0.0739349	1.90295	0.0739349	0.0739349	1.90295	258	0
ERS451417_01500	1717.62.peg.1508	NA	NA	NA	1	12	Cdiphtheriae_NCTC11397,"Cefficiens_YS314","Cglutamicum_ATCC13032","Chalotolerans_YIM70093","Chumireducens_DSM45392","Cpseudotuberculosis_31","Cpseudotuberculosis_ATCC19410","Csilvaticum_KL0182","Ctestudinoris_DSM44614","Culcerans_NCTC12077","Culcerans_NCTC7910","Cvitaeruminis_DSM20294"	0.309471	0.309471	1.79976	0.309471	0.309471	1.79976	258	0
ERS451417_00988	1717.62.peg.999	NA	NA	NA	1	39	Cargentoratense_DSM44202,"Catypicum_R2070","Caurimucosum_ATCC700975","Cbelfantii_FRC0043","Ccallunae_DSM20147","Ccamporealensis_DSM44610","Cdeserti_GIMN1010","Cdiphtheriae_NCTC11397","Cdoosanense_DSM45436","Cefficiens_YS314","Cepidermidicanis_DSM45586","Cfalsenii_DSM44353","Cglutamicum_ATCC13032","Cglycinophilum_AJ3170","Chalotolerans_YIM70093","Chumireducens_DSM45392","Cimitans_DSM44264","Cjeike…	0.215222	0.215222	1.60316	0.215222	0.215222	1.60315	258	0
ERS451417_02384	1717.62.peg.2416	NA	NA	NA	1	37	Cargentoratense_DSM44202,"Catypicum_R2070","Caurimucosum_ATCC700975","Cbelfantii_FRC0043","Ccallunae_DSM20147","Ccamporealensis_DSM44610","Cdeserti_GIMN1010","Cdiphtheriae_NCTC11397","Cdoosanense_DSM45436","Cefficiens_YS314","Cepidermidicanis_DSM45586","Cfalsenii_DSM44353","Cglutamicum_ATCC13032","Cglycinophilum_AJ3170","Chalotolerans_YIM70093","Chumireducens_DSM45392","Cimitans_DSM44264","Cjeike…	0.0654881	0.0654881	1.79333	0.0654881	0.0654881	1.79333	1026	2	1. 0.54244;2. 217;3. 649;4. 268;5. 268;6. 802;7. 353;8. 1057;9. 520;10. A;11. GCC	1. 0.53482;2. 287;3. 859;4. 338;5. 338;6. 1012;7. 423;8. 1267;9. 730;10. T;11. ACC
ERS451417_00298	1717.62.peg.299	NA	NA	NA	1	38	Cargentoratense_DSM44202,"Catypicum_R2070","Caurimucosum_ATCC700975","Cbelfantii_FRC0043","Ccallunae_DSM20147","Ccamporealensis_DSM44610","Cdeserti_GIMN1010","Cdiphtheriae_NCTC11397","Cdoosanense_DSM45436","Cefficiens_YS314","Cepidermidicanis_DSM45586","Cfalsenii_DSM44353","Cglutamicum_ATCC13032","Cglycinophilum_AJ3170","Chalotolerans_YIM70093","Chumireducens_DSM45392","Cimitans_DSM44264","Cjeike…	0.200553	0.200553	1.73465	0.200553	0.200553	1.73465	1282	0
ERS451417_01643	1717.62.peg.1650	NA	NA	NA	1	38	Cargentoratense_DSM44202,"Catypicum_R2070","Caurimucosum_ATCC700975","Cbelfantii_FRC0043","Ccallunae_DSM20147","Ccamporealensis_DSM44610","Cdeserti_GIMN1010","Cdiphtheriae_NCTC11397","Cdoosanense_DSM45436","Cefficiens_YS314","Cepidermidicanis_DSM45586","Cfalsenii_DSM44353","Cglutamicum_ATCC13032","Cglycinophilum_AJ3170","Chalotolerans_YIM70093","Chumireducens_DSM45392","Cimitans_DSM44264","Cjeike…	0.263018	0.263018	1.5811	0.263018	0.263018	1.5811	1282	0
ERS451417_00225	1717.62.peg.221	NA	NA	NA	1	32	Cargentoratense_DSM44202,"Catypicum_R2070","Caurimucosum_ATCC700975","Cbelfantii_FRC0043","Ccallunae_DSM20147","Ccamporealensis_DSM44610","Cdeserti_GIMN1010","Cdiphtheriae_NCTC11397","Cefficiens_YS314","Cepidermidicanis_DSM45586","Cglutamicum_ATCC13032","Chalotolerans_YIM70093","Chumireducens_DSM45392","Cimitans_DSM44264","Ckroppenstedtii_DSM44385","Ckutscheri_DSM20755","Clactis_RW25","Cmarinum_D…	0.160702	0.160702	1.74336	0.160702	0.160702	1.74336	1282	0
ERS451417_00174	1717.62.peg.172	NA	NA	NA	1	7	Cdiphtheriae_NCTC11397,"Ckutscheri_DSM20755","Cpseudotuberculosis_31","Cpseudotuberculosis_ATCC19410","Csilvaticum_KL0182","Culcerans_NCTC12077","Culcerans_NCTC7910"	0.163705	0.163705	2.89684	0.221706	0.159208	2.91706	2	4	1. 0.59623;2. 27;3. 79;4. 36;5. 36;6. 106;7. 40;8. 118;9. 58;10. V;11. GTG	1. 0.55469;2. 32;3. 94;4. 41;5. 41;6. 121;7. 45;8. 133;9. 73;10. A;11. GCG	1. 0.58019;2. 173;3. 517;4. 182;5. 182;6. 544;7. 186;8. 556;9. 496;10. A;11. GCT	1. 0.43279;2. 200;3. 598;4. 209;5. 209;6. 625;7. 213;8. 637;9. 577;10. A;11. GCG
ERS451417_02054	1717.62.peg.2066	NA	NA	NA	1	10	Cbelfantii_FRC0043,"Cdiphtheriae_NCTC11397","Cepidermidicanis_DSM45586","Cmustelae_DSM45274","Cpseudotuberculosis_31","Cpseudotuberculosis_ATCC19410","Csilvaticum_KL0182","Culcerans_NCTC12077","Culcerans_NCTC7910","Cvitaeruminis_DSM20294"	0.0654106	0.0654106	2.26801	0.0654106	0.0654106	2.26801	2	1	1. 0.5797;2. 217;3. 649;4. 347;5. 270;6. 808;7. 273;8. 817;9. 490;10. I;11. ATT
ERS451417_02295	1717.62.peg.2324	NA	NA	NA	1	8	Cbelfantii_FRC0043,"Cdiphtheriae_NCTC11397","Cpseudotuberculosis_31","Cpseudotuberculosis_ATCC19410","Csilvaticum_KL0182","Culcerans_NCTC12077","Culcerans_NCTC7910","Cvitaeruminis_DSM20294"	1	0.128308	3.04927	0.133326	0.133326	3.06857	2048	1	1. 0.86845;2. 167;3. 499;4. 190;5. 185;6. 553;7. 185;8. 553;9. 496;10. P;11. CCA
ERS451417_00104	1717.62.peg.102	NA	NA	NA	1	12	Cbelfantii_FRC0043,"Cdeserti_GIMN1010","Cdiphtheriae_NCTC11397","Cefficiens_YS314","Chalotolerans_YIM70093","Cpseudotuberculosis_31","Cpseudotuberculosis_ATCC19410","Crouxii_FRC0190","Csilvaticum_KL0182","Culcerans_NCTC12077","Culcerans_NCTC7910","Cvitaeruminis_DSM20294"	0.218845	0.218845	2.10918	0.218845	0.218845	2.10918	2	1	1. 0.62549;2. 44;3. 130;4. 90;5. 90;6. 268;7. 104;8. 310;9. 88;10. P;11. CCG
ERS451417_01159	1717.62.peg.1170	NA	NA	NA	1	39	Cargentoratense_DSM44202,"Catypicum_R2070","Caurimucosum_ATCC700975","Cbelfantii_FRC0043","Ccallunae_DSM20147","Ccamporealensis_DSM44610","Cdeserti_GIMN1010","Cdiphtheriae_NCTC11397","Cdoosanense_DSM45436","Cefficiens_YS314","Cepidermidicanis_DSM45586","Cfalsenii_DSM44353","Cglutamicum_ATCC13032","Cglycinophilum_AJ3170","Chalotolerans_YIM70093","Chumireducens_DSM45392","Cimitans_DSM44264","Cjeike…	0.219125	0.219125	1.74687	0.219125	0.219125	1.74687	2	4	1. 0.65355;2. 239;3. 715;4. 254;5. 254;6. 760;7. 330;8. 988;9. 520;10. V;11. GTT	1. 0.65092;2. 305;3. 913;4. 320;5. 320;6. 958;7. 396;8. 1186;9. 718;10. G;11. GGG	1. 0.59278;2. 314;3. 940;4. 329;5. 329;6. 985;7. 405;8. 1213;9. 745;10. V;11. GTA	1. 0.62889;2. 792;3. 2374;4. 831;5. 831;6. 2491;7. 939;8. 2815;9. 1990;10. A;11. GCA
ERS451417_00010	1717.62.peg.11	NA	NA	NA	1	27	Catypicum_R2070,"Caurimucosum_ATCC700975","Cbelfantii_FRC0043","Ccallunae_DSM20147","Ccamporealensis_DSM44610","Cdeserti_GIMN1010","Cdiphtheriae_NCTC11397","Cdoosanense_DSM45436","Cefficiens_YS314","Cepidermidicanis_DSM45586","Cglutamicum_ATCC13032","Chalotolerans_YIM70093","Chumireducens_DSM45392","Ckutscheri_DSM20755","Cmarinum_DSM44953","Cmaris_DSM45190","Cmustelae_DSM45274","Cpseudotuberculos…	0.160567	0.160567	1.96704	0.160567	0.160567	1.96704	258	0
ERS451417_01333	1717.62.peg.1341	NA	NA	NA	1	38	Cargentoratense_DSM44202,"Catypicum_R2070","Caurimucosum_ATCC700975","Cbelfantii_FRC0043","Ccallunae_DSM20147","Ccamporealensis_DSM44610","Cdeserti_GIMN1010","Cdiphtheriae_NCTC11397","Cdoosanense_DSM45436","Cefficiens_YS314","Cepidermidicanis_DSM45586","Cfalsenii_DSM44353","Cglutamicum_ATCC13032","Cglycinophilum_AJ3170","Chalotolerans_YIM70093","Chumireducens_DSM45392","Cimitans_DSM44264","Cjeike…	0.132767	0.132767	1.79503	0.132767	0.132767	1.79503	1026	1	1. 0.56461;2. 347;3. 1039;4. 394;5. 394;6. 1180;7. 530;8. 1588;9. 841;10. A;11. GCA
ERS451417_00385	1717.62.peg.385	NA	NA	NA	1	7	Cbelfantii_FRC0043,"Cdiphtheriae_NCTC11397","Cpseudotuberculosis_ATCC19410","Crouxii_FRC0190","Csilvaticum_KL0182","Culcerans_NCTC12077","Culcerans_NCTC7910"	0.310519	0.310519	3.27018	0.310519	0.310519	3.27018	258	0
ERS451417_00677	1717.62.peg.684	NA	NA	NA	1	39	Cargentoratense_DSM44202,"Catypicum_R2070","Caurimucosum_ATCC700975","Cbelfantii_FRC0043","Ccallunae_DSM20147","Ccamporealensis_DSM44610","Cdeserti_GIMN1010","Cdiphtheriae_NCTC11397","Cdoosanense_DSM45436","Cefficiens_YS314","Cepidermidicanis_DSM45586","Cfalsenii_DSM44353","Cglutamicum_ATCC13032","Cglycinophilum_AJ3170","Chalotolerans_YIM70093","Chumireducens_DSM45392","Cimitans_DSM44264","Cjeike…	0.0765887	0.0765887	1.66885	0.0765887	0.0765887	1.66885	258	0
ERS451417_02034	1717.62.peg.2039	NA	NA	NA	1	38	Cargentoratense_DSM44202,"Catypicum_R2070","Caurimucosum_ATCC700975","Cbelfantii_FRC0043","Ccallunae_DSM20147","Ccamporealensis_DSM44610","Cdeserti_GIMN1010","Cdiphtheriae_NCTC11397","Cdoosanense_DSM45436","Cefficiens_YS314","Cepidermidicanis_DSM45586","Cfalsenii_DSM44353","Cglutamicum_ATCC13032","Cglycinophilum_AJ3170","Chalotolerans_YIM70093","Chumireducens_DSM45392","Cimitans_DSM44264","Cjeike…	0.0958951	0.0958951	1.99081	0.0958951	0.0958951	1.99081	258	0
ERS451417_00390	1717.62.peg.390	NA	NA	NA	1	39	Cargentoratense_DSM44202,"Catypicum_R2070","Caurimucosum_ATCC700975","Cbelfantii_FRC0043","Ccallunae_DSM20147","Ccamporealensis_DSM44610","Cdeserti_GIMN1010","Cdiphtheriae_NCTC11397","Cdoosanense_DSM45436","Cefficiens_YS314","Cepidermidicanis_DSM45586","Cfalsenii_DSM44353","Cglutamicum_ATCC13032","Cglycinophilum_AJ3170","Chalotolerans_YIM70093","Chumireducens_DSM45392","Cimitans_DSM44264","Cjeike…	0.33438	0.0751608	2.19363	0.177543	0.075161	2.19362	258	0
ERS451417_00969	1717.62.peg.977	NA	NA	NA	1	13	Caurimucosum_ATCC700975,"Cbelfantii_FRC0043","Cdiphtheriae_NCTC11397","Cepidermidicanis_DSM45586","Ckutscheri_DSM20755","Clactis_RW25","Cpseudotuberculosis_31","Cpseudotuberculosis_ATCC19410","Crouxii_FRC0190","Csilvaticum_KL0182","Ctestudinoris_DSM44614","Culcerans_NCTC12077","Culcerans_NCTC7910"	0.265877	0.208504	2.5928	0.265877	0.208504	2.5928	2050	1	1. 0.73766;2. 170;3. 508;4. 248;5. 204;6. 610;7. 237;8. 709;9. 382;10. A;11. GCA
ERS451417_02175	1717.62.peg.2201	NA	NA	NA	1	7	Cbelfantii_FRC0043,"Cdiphtheriae_NCTC11397","Cpseudotuberculosis_31","Cpseudotuberculosis_ATCC19410","Csilvaticum_KL0182","Culcerans_NCTC12077","Culcerans_NCTC7910"	0.0959092	0.0959092	2.77426	0.0959092	0.0959092	2.77427	2	2	1. 0.47565;2. 38;3. 112;4. 61;5. 45;6. 133;7. 45;8. 133;9. 112;10. I;11. ATC	1. 0.46018;2. 886;3. 2656;4. 986;5. 915;6. 2743;7. 918;8. 2752;9. 2572;10. E;11. GAA
ERS451417_01493	1717.62.peg.1501	NA	NA	NA	1	38	Cargentoratense_DSM44202,"Catypicum_R2070","Caurimucosum_ATCC700975","Cbelfantii_FRC0043","Ccallunae_DSM20147","Ccamporealensis_DSM44610","Cdeserti_GIMN1010","Cdiphtheriae_NCTC11397","Cdoosanense_DSM45436","Cefficiens_YS314","Cepidermidicanis_DSM45586","Cfalsenii_DSM44353","Cglutamicum_ATCC13032","Cglycinophilum_AJ3170","Chalotolerans_YIM70093","Chumireducens_DSM45392","Cimitans_DSM44264","Cjeike…	0.195066	0.195066	2.2387	0.195066	0.195066	2.2387	258	0
ERS451417_00221	1717.62.peg.218	NA	NA	NA	1	10	Cbelfantii_FRC0043,"Cdiphtheriae_NCTC11397","Ckutscheri_DSM20755","Cpseudotuberculosis_31","Cpseudotuberculosis_ATCC19410","Crouxii_FRC0190","Csilvaticum_KL0182","Culcerans_NCTC12077","Culcerans_NCTC7910","Cvitaeruminis_DSM20294"	0.0842599	0.0842599	2.41013	0.0842599	0.0842599	2.41012	2306	0
ERS451417_00681	1717.62.peg.688	NA	NA	NA	1	39	Cargentoratense_DSM44202,"Catypicum_R2070","Caurimucosum_ATCC700975","Cbelfantii_FRC0043","Ccallunae_DSM20147","Ccamporealensis_DSM44610","Cdeserti_GIMN1010","Cdiphtheriae_NCTC11397","Cdoosanense_DSM45436","Cefficiens_YS314","Cepidermidicanis_DSM45586","Cfalsenii_DSM44353","Cglutamicum_ATCC13032","Cglycinophilum_AJ3170","Chalotolerans_YIM70093","Chumireducens_DSM45392","Cimitans_DSM44264","Cjeike…	0.137177	0.137177	1.71338	0.137177	0.137177	1.71338	258	0
1717.62.peg.556	1717.62.peg.556	NA	NA	NA	1	25	Caurimucosum_ATCC700975,"Cbelfantii_FRC0043","Ccallunae_DSM20147","Ccamporealensis_DSM44610","Cdiphtheriae_NCTC11397","Cdoosanense_DSM45436","Cefficiens_YS314","Cglutamicum_ATCC13032","Chalotolerans_YIM70093","Cimitans_DSM44264","Ckutscheri_DSM20755","Cmarinum_DSM44953","Cmaris_DSM45190","Cmustelae_DSM45274","Cpseudotuberculosis_ATCC19410","CriegeliiPUDD83A45","Crouxii_FRC0190","Csilvaticum_KL018…	0.428053	0.426931	1.49232	0.428053	0.426931	1.49232	5122	2	1. 0.43867;2. 82;3. 244;4. 142;5. 104;6. 310;7. 146;8. 436;9. 220;10. V;11. GTA	1. 0.46418;2. 99;3. 295;4. 159;5. 121;6. 361;7. 163;8. 487;9. 271;10. L;11. TTG
ERS451417_00657	1717.62.peg.662	NA	NA	NA	1	39	Cargentoratense_DSM44202,"Catypicum_R2070","Caurimucosum_ATCC700975","Cbelfantii_FRC0043","Ccallunae_DSM20147","Ccamporealensis_DSM44610","Cdeserti_GIMN1010","Cdiphtheriae_NCTC11397","Cdoosanense_DSM45436","Cefficiens_YS314","Cepidermidicanis_DSM45586","Cfalsenii_DSM44353","Cglutamicum_ATCC13032","Cglycinophilum_AJ3170","Chalotolerans_YIM70093","Chumireducens_DSM45392","Cimitans_DSM44264","Cjeike…	0.151984	0.151984	1.67051	0.151984	0.151984	1.67051	3074	1	1. 0.45788;2. 541;3. 1621;4. 587;5. 587;6. 1759;7. 755;8. 2263;9. 1339;10. I;11. ATT
ERS451417_01549	1717.62.peg.1558	NA	NA	NA	1	23	Cargentoratense_DSM44202,"Caurimucosum_ATCC700975","Cbelfantii_FRC0043","Ccallunae_DSM20147","Ccamporealensis_DSM44610","Cdeserti_GIMN1010","Cdiphtheriae_NCTC11397","Cefficiens_YS314","Cglutamicum_ATCC13032","Chalotolerans_YIM70093","Chumireducens_DSM45392","Ckutscheri_DSM20755","Cmarinum_DSM44953","Cpseudotuberculosis_31","Cpseudotuberculosis_ATCC19410","Csilvaticum_KL0182","Csimulans_PES1","Csi…	0.128113	0.128113	1.6419	0.128113	0.128113	1.6419	2306	0
ERS451417_00778	1717.62.peg.785	NA	NA	NA	1	39	Cargentoratense_DSM44202,"Catypicum_R2070","Caurimucosum_ATCC700975","Cbelfantii_FRC0043","Ccallunae_DSM20147","Ccamporealensis_DSM44610","Cdeserti_GIMN1010","Cdiphtheriae_NCTC11397","Cdoosanense_DSM45436","Cefficiens_YS314","Cepidermidicanis_DSM45586","Cfalsenii_DSM44353","Cglutamicum_ATCC13032","Cglycinophilum_AJ3170","Chalotolerans_YIM70093","Chumireducens_DSM45392","Cimitans_DSM44264","Cjeike…	0.19139	0.19139	1.82949	0.19139	0.19139	1.82949	3330	0
ERS451417_01814	1717.62.peg.1819	NA	NA	NA	1	38	Cargentoratense_DSM44202,"Catypicum_R2070","Caurimucosum_ATCC700975","Cbelfantii_FRC0043","Ccallunae_DSM20147","Ccamporealensis_DSM44610","Cdeserti_GIMN1010","Cdiphtheriae_NCTC11397","Cdoosanense_DSM45436","Cefficiens_YS314","Cepidermidicanis_DSM45586","Cfalsenii_DSM44353","Cglutamicum_ATCC13032","Cglycinophilum_AJ3170","Chalotolerans_YIM70093","Chumireducens_DSM45392","Cimitans_DSM44264","Cjeike…	0.141722	0.141722	1.90399	0.141722	0.141722	1.90399	258	0
ERS451417_01042	1717.62.peg.1052	NA	NA	NA	1	39	Cargentoratense_DSM44202,"Catypicum_R2070","Caurimucosum_ATCC700975","Cbelfantii_FRC0043","Ccallunae_DSM20147","Ccamporealensis_DSM44610","Cdeserti_GIMN1010","Cdiphtheriae_NCTC11397","Cdoosanense_DSM45436","Cefficiens_YS314","Cepidermidicanis_DSM45586","Cfalsenii_DSM44353","Cglutamicum_ATCC13032","Cglycinophilum_AJ3170","Chalotolerans_YIM70093","Chumireducens_DSM45392","Cimitans_DSM44264","Cjeike…	0.139012	0.130648	1.91199	0.139012	0.130648	1.91199	2	2	1. 0.68575;2. 95;3. 283;4. 121;5. 121;6. 361;7. 187;8. 559;9. 241;10. T;11. ACC	1. 0.63511;2. 298;3. 892;4. 324;5. 324;6. 970;7. 390;8. 1168;9. 844;10. I;11. ATC
ERS451417_02222	1717.62.peg.2247	NA	NA	NA	1	36	Cargentoratense_DSM44202,"Catypicum_R2070","Caurimucosum_ATCC700975","Cbelfantii_FRC0043","Ccallunae_DSM20147","Ccamporealensis_DSM44610","Cdeserti_GIMN1010","Cdiphtheriae_NCTC11397","Cdoosanense_DSM45436","Cefficiens_YS314","Cepidermidicanis_DSM45586","Cfalsenii_DSM44353","Cglutamicum_ATCC13032","Cglycinophilum_AJ3170","Chalotolerans_YIM70093","Chumireducens_DSM45392","Cimitans_DSM44264","Cjeike…	0.0879819	0.0879819	1.82631	0.0879819	0.0879819	1.82631	258	0
ERS451417_01460	1717.62.peg.1470	NA	NA	NA	1	29	Caurimucosum_ATCC700975,"Cbelfantii_FRC0043","Ccallunae_DSM20147","Ccamporealensis_DSM44610","Cdeserti_GIMN1010","Cdiphtheriae_NCTC11397","Cdoosanense_DSM45436","Cefficiens_YS314","Cepidermidicanis_DSM45586","Cfalsenii_DSM44353","Chalotolerans_YIM70093","Chumireducens_DSM45392","Cimitans_DSM44264","Ckroppenstedtii_DSM44385","Ckutscheri_DSM20755","Clactis_RW25","Cmarinum_DSM44953","Cmaris_DSM45190…	0.223325	0.223325	1.49746	0.223325	0.223325	1.49746	3074	1	1. 0.41885;2. 146;3. 436;4. 157;5. 157;6. 469;7. 158;8. 472;9. 415;10. V;11. GTT
ERS451417_01600	1717.62.peg.1609	NA	NA	NA	1	35	Cargentoratense_DSM44202,"Catypicum_R2070","Caurimucosum_ATCC700975","Cbelfantii_FRC0043","Ccallunae_DSM20147","Ccamporealensis_DSM44610","Cdeserti_GIMN1010","Cdiphtheriae_NCTC11397","Cdoosanense_DSM45436","Cefficiens_YS314","Cepidermidicanis_DSM45586","Cglutamicum_ATCC13032","Cglycinophilum_AJ3170","Chalotolerans_YIM70093","Chumireducens_DSM45392","Cimitans_DSM44264","Cjeikeium_K41","Ckutscheri_…	0.247465	0.247465	1.74056	0.247465	0.247465	1.74056	3330	0
ERS451417_01472	1717.62.peg.1482	NA	NA	NA	1	31	Catypicum_R2070,"Caurimucosum_ATCC700975","Cbelfantii_FRC0043","Ccallunae_DSM20147","Ccamporealensis_DSM44610","Cdeserti_GIMN1010","Cdiphtheriae_NCTC11397","Cdoosanense_DSM45436","Cefficiens_YS314","Cepidermidicanis_DSM45586","Cglutamicum_ATCC13032","Chalotolerans_YIM70093","Chumireducens_DSM45392","Cimitans_DSM44264","Ckutscheri_DSM20755","Clactis_RW25","Cmarinum_DSM44953","Cmaris_DSM45190","Cmu…	0.299102	0.299102	1.60153	0.299102	0.299102	1.60153	3330	0
ERS451417_02263	1717.62.peg.2292	NA	NA	NA	1	28	Caurimucosum_ATCC700975,"Cbelfantii_FRC0043","Ccallunae_DSM20147","Ccamporealensis_DSM44610","Cdeserti_GIMN1010","Cdiphtheriae_NCTC11397","Cdoosanense_DSM45436","Cefficiens_YS314","Cepidermidicanis_DSM45586","Cglutamicum_ATCC13032","Chalotolerans_YIM70093","Chumireducens_DSM45392","Cimitans_DSM44264","Ckutscheri_DSM20755","Cmarinum_DSM44953","Cmaris_DSM45190","Cmustelae_DSM45274","Cpseudotubercul…	0.184484	0.184484	1.60815	0.184484	0.184484	1.60815	1282	0
ERS451417_00542	1717.62.peg.546	NA	NA	NA	1	38	Cargentoratense_DSM44202,"Catypicum_R2070","Caurimucosum_ATCC700975","Cbelfantii_FRC0043","Ccallunae_DSM20147","Ccamporealensis_DSM44610","Cdeserti_GIMN1010","Cdiphtheriae_NCTC11397","Cdoosanense_DSM45436","Cefficiens_YS314","Cepidermidicanis_DSM45586","Cfalsenii_DSM44353","Cglutamicum_ATCC13032","Chalotolerans_YIM70093","Chumireducens_DSM45392","Cimitans_DSM44264","Cjeikeium_K41","Ckroppenstedti…	0.302889	0.302889	1.59949	0.302889	0.302889	1.59949	3074	2	1. 0.45361;2. 218;3. 652;4. 282;5. 282;6. 844;7. 343;8. 1027;9. 496;10. D;11. GAC	1. 0.56616;2. 268;3. 802;4. 332;5. 332;6. 994;7. 393;8. 1177;9. 646;10. V;11. GTC
ERS451417_00659	1717.62.peg.663	NA	NA	NA	1	28	Catypicum_R2070,"Caurimucosum_ATCC700975","Cbelfantii_FRC0043","Ccallunae_DSM20147","Ccamporealensis_DSM44610","Cdeserti_GIMN1010","Cdiphtheriae_NCTC11397","Cdoosanense_DSM45436","Cepidermidicanis_DSM45586","Cglutamicum_ATCC13032","Chalotolerans_YIM70093","Chumireducens_DSM45392","Cimitans_DSM44264","Cmarinum_DSM44953","Cmaris_DSM45190","Cmustelae_DSM45274","Cpseudotuberculosis_31","Cpseudotuberc…	0.269452	0.269452	1.59204	0.269452	0.269452	1.59204	3330	0
ERS451417_01513	1717.62.peg.1521	NA	NA	NA	1	14	Cargentoratense_DSM44202,"Cbelfantii_FRC0043","Cdiphtheriae_NCTC11397","Cepidermidicanis_DSM45586","Ckroppenstedtii_DSM44385","Ckutscheri_DSM20755","Clactis_RW25","Cmustelae_DSM45274","Cpseudotuberculosis_31","Cpseudotuberculosis_ATCC19410","Csilvaticum_KL0182","Culcerans_NCTC12077","Culcerans_NCTC7910","Cvitaeruminis_DSM20294"	0.152982	0.152982	2.21958	0.184286	0.152791	2.22217	3074	2	1. 0.61165;2. 179;3. 535;4. 203;5. 203;6. 607;7. 223;8. 667;9. 448;10. V;11. GTT	1. 0.57015;2. 377;3. 1129;4. 417;5. 417;6. 1249;7. 461;8. 1381;9. 916;10. D;11. GAT
ERS451417_00469	1717.62.peg.473	NA	NA	NA	1	12	Cbelfantii_FRC0043,"Cdiphtheriae_NCTC11397","Ckutscheri_DSM20755","Cmustelae_DSM45274","Cpseudotuberculosis_31","Cpseudotuberculosis_ATCC19410","Crouxii_FRC0190","Csilvaticum_KL0182","Culcerans_NCTC12077","Culcerans_NCTC7910","Cuterequi_DSM45634","Cvitaeruminis_DSM20294"	0.0688948	0.0688948	2.55341	0.0688948	0.0688948	2.55342	258	0
ERS451417_01792	1717.62.peg.1797	NA	NA	NA	1	38	Cargentoratense_DSM44202,"Catypicum_R2070","Caurimucosum_ATCC700975","Cbelfantii_FRC0043","Ccallunae_DSM20147","Ccamporealensis_DSM44610","Cdeserti_GIMN1010","Cdiphtheriae_NCTC11397","Cdoosanense_DSM45436","Cefficiens_YS314","Cepidermidicanis_DSM45586","Cfalsenii_DSM44353","Cglutamicum_ATCC13032","Cglycinophilum_AJ3170","Chalotolerans_YIM70093","Chumireducens_DSM45392","Cimitans_DSM44264","Cjeike…	0.222347	0.222347	1.62672	0.222356	0.222356	1.62673	1026	1	1. 0.61847;2. 317;3. 949;4. 367;5. 367;6. 1099;7. 570;8. 1708;9. 775;10. A;11. GCT
ERS451417_01148	1717.62.peg.1159	NA	NA	NA	1	38	Cargentoratense_DSM44202,"Catypicum_R2070","Caurimucosum_ATCC700975","Cbelfantii_FRC0043","Ccallunae_DSM20147","Ccamporealensis_DSM44610","Cdeserti_GIMN1010","Cdiphtheriae_NCTC11397","Cdoosanense_DSM45436","Cefficiens_YS314","Cepidermidicanis_DSM45586","Cfalsenii_DSM44353","Cglutamicum_ATCC13032","Cglycinophilum_AJ3170","Chalotolerans_YIM70093","Chumireducens_DSM45392","Cimitans_DSM44264","Ckropp…	0.161326	0.161326	1.67542	0.161326	0.161326	1.67542	258	0
ERS451417_00817	1717.62.peg.823	NA	NA	NA	1	35	Cargentoratense_DSM44202,"Catypicum_R2070","Caurimucosum_ATCC700975","Cbelfantii_FRC0043","Ccallunae_DSM20147","Ccamporealensis_DSM44610","Cdeserti_GIMN1010","Cdiphtheriae_NCTC11397","Cdoosanense_DSM45436","Cefficiens_YS314","Cepidermidicanis_DSM45586","Cglutamicum_ATCC13032","Chalotolerans_YIM70093","Chumireducens_DSM45392","Cimitans_DSM44264","Ckroppenstedtii_DSM44385","Ckutscheri_DSM20755","Cl…	0.198947	0.198947	1.55076	0.198947	0.198947	1.55076	3330	0
ERS451417_00598	1717.62.peg.602	NA	NA	NA	1	12	Cdiphtheriae_NCTC11397,"Chalotolerans_YIM70093","Chumireducens_DSM45392","Cmarinum_DSM44953","Cpseudotuberculosis_31","Cpseudotuberculosis_ATCC19410","Crouxii_FRC0190","Csilvaticum_KL0182","Csimulans_PES1","Ctestudinoris_DSM44614","Culcerans_NCTC12077","Culcerans_NCTC7910"	0.318924	0.206446	2.7951	0.318924	0.206446	2.7951	2050	2	1. 0.71877;2. 20;3. 58;4. 72;5. 21;6. 61;7. 20;8. 58;9. 25;10. L;11. CTG	1. 0.67681;2. 24;3. 70;4. 76;5. 25;6. 73;7. 24;8. 70;9. 37;10. M;11. ATG
ERS451417_01189	1717.62.peg.1198	NA	NA	NA	1	24	Cargentoratense_DSM44202,"Cbelfantii_FRC0043","Cdiphtheriae_NCTC11397","Cefficiens_YS314","Cepidermidicanis_DSM45586","Cfalsenii_DSM44353","Cglutamicum_ATCC13032","Cglycinophilum_AJ3170","Chumireducens_DSM45392","Cimitans_DSM44264","Ckroppenstedtii_DSM44385","Ckutscheri_DSM20755","Clactis_RW25","Cpseudotuberculosis_31","Cpseudotuberculosis_ATCC19410","CriegeliiPUDD83A45","Crouxii_FRC0190","Csilva…	0.255295	0.255295	1.68296	0.255295	0.255295	1.68297	3074	2	1. 0.4776;2. 74;3. 220;4. 107;5. 107;6. 319;7. 171;8. 511;9. 100;10. A;11. GCT	1. 0.50844;2. 183;3. 547;4. 223;5. 223;6. 667;7. 290;8. 868;9. 367;10. A;11. GCG
ERS451417_01044	1717.62.peg.1054	NA	NA	NA	1	34	Cargentoratense_DSM44202,"Catypicum_R2070","Caurimucosum_ATCC700975","Cbelfantii_FRC0043","Ccallunae_DSM20147","Ccamporealensis_DSM44610","Cdeserti_GIMN1010","Cdiphtheriae_NCTC11397","Cdoosanense_DSM45436","Cefficiens_YS314","Cepidermidicanis_DSM45586","Cfalsenii_DSM44353","Cglutamicum_ATCC13032","Cglycinophilum_AJ3170","Chalotolerans_YIM70093","Chumireducens_DSM45392","Cimitans_DSM44264","Cjeike…	0.199034	0.199034	1.94233	0.199034	0.199034	1.94233	7426	0
ERS451417_01376	1717.62.peg.1385	NA	NA	NA	1	38	Cargentoratense_DSM44202,"Catypicum_R2070","Caurimucosum_ATCC700975","Cbelfantii_FRC0043","Ccallunae_DSM20147","Ccamporealensis_DSM44610","Cdeserti_GIMN1010","Cdiphtheriae_NCTC11397","Cdoosanense_DSM45436","Cefficiens_YS314","Cepidermidicanis_DSM45586","Cfalsenii_DSM44353","Cglutamicum_ATCC13032","Cglycinophilum_AJ3170","Chalotolerans_YIM70093","Chumireducens_DSM45392","Cimitans_DSM44264","Cjeike…	0.179437	0.179437	1.57768	0.179437	0.179437	1.57768	258	0
ERS451417_02233	1717.62.peg.2258	NA	NA	NA	1	38	Cargentoratense_DSM44202,"Catypicum_R2070","Caurimucosum_ATCC700975","Cbelfantii_FRC0043","Ccallunae_DSM20147","Ccamporealensis_DSM44610","Cdeserti_GIMN1010","Cdiphtheriae_NCTC11397","Cdoosanense_DSM45436","Cefficiens_YS314","Cepidermidicanis_DSM45586","Cfalsenii_DSM44353","Cglutamicum_ATCC13032","Cglycinophilum_AJ3170","Chalotolerans_YIM70093","Chumireducens_DSM45392","Cimitans_DSM44264","Cjeike…	0.157401	0.157401	1.6488	0.157401	0.157401	1.6488	1282	0
ERS451417_00796	1717.62.peg.802	NA	NA	NA	1	39	Cargentoratense_DSM44202,"Catypicum_R2070","Caurimucosum_ATCC700975","Cbelfantii_FRC0043","Ccallunae_DSM20147","Ccamporealensis_DSM44610","Cdeserti_GIMN1010","Cdiphtheriae_NCTC11397","Cdoosanense_DSM45436","Cefficiens_YS314","Cepidermidicanis_DSM45586","Cfalsenii_DSM44353","Cglutamicum_ATCC13032","Cglycinophilum_AJ3170","Chalotolerans_YIM70093","Chumireducens_DSM45392","Cimitans_DSM44264","Cjeike…	0.0981814	0.0981814	1.96438	0.0981814	0.0981814	1.96438	258	0
ERS451417_02237	1717.62.peg.2262	NA	NA	NA	1	15	Caurimucosum_ATCC700975,"Cbelfantii_FRC0043","Ccamporealensis_DSM44610","Cdiphtheriae_NCTC11397","Cfalsenii_DSM44353","Cjeikeium_K41","Ckroppenstedtii_DSM44385","Clactis_RW25","Cpseudotuberculosis_31","Cpseudotuberculosis_ATCC19410","Csilvaticum_KL0182","Csimulans_PES1","Culcerans_NCTC12077","Culcerans_NCTC7910","Curealyticum_DSM7109"	0.122481	0.122481	2.10471	0.122481	0.122481	2.10471	2	1	1. 0.66184;2. 566;3. 1696;4. 593;5. 580;6. 1738;7. 640;8. 1918;9. 1459;10. D;11. GAC
ERS451417_01589	1717.62.peg.1598	NA	NA	NA	1	4	Cdiphtheriae_NCTC11397,"Csilvaticum_KL0182","Culcerans_NCTC12077","Culcerans_NCTC7910"	0.11413	0.11413	1.63843	0.11414	0.11414	1.63845	258	0
ERS451417_00246	1717.62.peg.241	NA	NA	NA	1	13	Cbelfantii_FRC0043,"Cdiphtheriae_NCTC11397","Cimitans_DSM44264","Cmarinum_DSM44953","Cmustelae_DSM45274","Cpseudotuberculosis_31","Cpseudotuberculosis_ATCC19410","CriegeliiPUDD83A45","Crouxii_FRC0190","Culcerans_NCTC12077","Culcerans_NCTC7910","Cureicelerivorans_IMMIBRIV2301","Cuterequi_DSM45634"	0.362343	0.362343	1.92988	0.362343	0.362343	1.92988	258	0
ERS451417_00947	1717.62.peg.954	NA	NA	NA	1	39	Cargentoratense_DSM44202,"Catypicum_R2070","Caurimucosum_ATCC700975","Cbelfantii_FRC0043","Ccallunae_DSM20147","Ccamporealensis_DSM44610","Cdeserti_GIMN1010","Cdiphtheriae_NCTC11397","Cdoosanense_DSM45436","Cefficiens_YS314","Cepidermidicanis_DSM45586","Cfalsenii_DSM44353","Cglutamicum_ATCC13032","Cglycinophilum_AJ3170","Chalotolerans_YIM70093","Chumireducens_DSM45392","Cimitans_DSM44264","Cjeike…	0.157254	0.157254	1.79401	0.157254	0.157254	1.79401	258	0
ERS451417_01369	1717.62.peg.1378	NA	NA	NA	1	20	Cbelfantii_FRC0043,"Cdeserti_GIMN1010","Cdiphtheriae_NCTC11397","Cdoosanense_DSM45436","Cefficiens_YS314","Cglutamicum_ATCC13032","Chalotolerans_YIM70093","Chumireducens_DSM45392","Ckutscheri_DSM20755","Cmarinum_DSM44953","Cmaris_DSM45190","Cmustelae_DSM45274","Cpseudotuberculosis_31","Cpseudotuberculosis_ATCC19410","Csilvaticum_KL0182","Ctestudinoris_DSM44614","Culcerans_NCTC12077","Culcerans_NC…	0.264292	0.264292	1.533	0.264292	0.264292	1.533	2306	0
ERS451417_01252	1717.62.peg.1260	NA	NA	NA	1	8	Cbelfantii_FRC0043,"Cdiphtheriae_NCTC11397","Cpseudotuberculosis_31","Cpseudotuberculosis_ATCC19410","Crouxii_FRC0190","Csilvaticum_KL0182","Culcerans_NCTC12077","Culcerans_NCTC7910"	0.0650877	0.0650877	4.15109	0.0650877	0.0650877	4.1511	1282	0
ERS451417_02150	1717.62.peg.2172	NA	NA	NA	1	8	Cbelfantii_FRC0043,"Cdiphtheriae_NCTC11397","Clactis_RW25","Cpseudotuberculosis_31","Cpseudotuberculosis_ATCC19410","Csilvaticum_KL0182","Culcerans_NCTC12077","Culcerans_NCTC7910"	0.0939266	0.0939266	3.01631	0.0939266	0.0939266	3.01633	258	0
ERS451417_02370	1717.62.peg.2400	NA	NA	NA	1	8	Caurimucosum_ATCC700975,"Cbelfantii_FRC0043","Cdiphtheriae_NCTC11397","Cpseudotuberculosis_31","Cpseudotuberculosis_ATCC19410","Csilvaticum_KL0182","Culcerans_NCTC12077","Culcerans_NCTC7910"	0.182633	0.182633	2.49044	0.182633	0.182633	2.49044	2306	0
ERS451417_00450	1717.62.peg.453	NA	NA	NA	1	15	Cbelfantii_FRC0043,"Ccallunae_DSM20147","Cdeserti_GIMN1010","Cdiphtheriae_NCTC11397","Cepidermidicanis_DSM45586","Cglutamicum_ATCC13032","Ckutscheri_DSM20755","Cmustelae_DSM45274","Cpseudotuberculosis_31","Cpseudotuberculosis_ATCC19410","Crouxii_FRC0190","Csilvaticum_KL0182","Ctestudinoris_DSM44614","Culcerans_NCTC12077","Culcerans_NCTC7910"	0.122297	0.122297	1.87591	0.122297	0.122297	1.87591	258	0
ERS451417_02285	1717.62.peg.2314	NA	NA	NA	1	7	Cbelfantii_FRC0043,"Cdiphtheriae_NCTC11397","Cpseudotuberculosis_31","Cpseudotuberculosis_ATCC19410","Csilvaticum_KL0182","Culcerans_NCTC12077","Culcerans_NCTC7910"	0.140414	0.140414	3.06452	0.140414	0.140414	3.06452	2	3	1. 0.64105;2. 249;3. 745;4. 328;5. 279;6. 835;7. 279;8. 835;9. 694;10. L;11. CTC	1. 0.62104;2. 406;3. 1216;4. 535;5. 438;6. 1312;7. 441;8. 1321;9. 1135;10. V;11. GTT	1. 0.63211;2. 435;3. 1303;4. 728;5. 467;6. 1399;7. 470;8. 1408;9. 1222;10. V;11. GTG
ERS451417_00962	1717.62.peg.969	NA	NA	NA	1	39	Cargentoratense_DSM44202,"Catypicum_R2070","Caurimucosum_ATCC700975","Cbelfantii_FRC0043","Ccallunae_DSM20147","Ccamporealensis_DSM44610","Cdeserti_GIMN1010","Cdiphtheriae_NCTC11397","Cdoosanense_DSM45436","Cefficiens_YS314","Cepidermidicanis_DSM45586","Cfalsenii_DSM44353","Cglutamicum_ATCC13032","Cglycinophilum_AJ3170","Chalotolerans_YIM70093","Chumireducens_DSM45392","Cimitans_DSM44264","Cjeike…	0.0783787	0.0783787	2.05642	0.0783787	0.0783787	2.0564	258	0
ERS451417_01007	1717.62.peg.1018	NA	NA	NA	1	13	Caurimucosum_ATCC700975,"Cbelfantii_FRC0043","Ccallunae_DSM20147","Cdiphtheriae_NCTC11397","Chalotolerans_YIM70093","Cmarinum_DSM44953","Cpseudotuberculosis_31","Cpseudotuberculosis_ATCC19410","Crouxii_FRC0190","Csilvaticum_KL0182","Csingulare_IBSB52218","Culcerans_NCTC12077","Culcerans_NCTC7910"	0.118994	0.118994	2.1771	0.118994	0.118994	2.1771	1026	1	1. 0.54479;2. 91;3. 271;4. 120;5. 118;6. 352;7. 133;8. 397;9. 247;10. I;11. ATT
ERS451417_00471	1717.62.peg.475	NA	NA	NA	1	15	Caurimucosum_ATCC700975,"Cbelfantii_FRC0043","Ccallunae_DSM20147","Cdiphtheriae_NCTC11397","Cglutamicum_ATCC13032","Cimitans_DSM44264","Ckutscheri_DSM20755","Clactis_RW25","Cpseudotuberculosis_31","CriegeliiPUDD83A45","Crouxii_FRC0190","Csilvaticum_KL0182","Culcerans_NCTC12077","Culcerans_NCTC7910","Cvitaeruminis_DSM20294"	0.237135	0.237135	2.41778	0.237135	0.237135	2.41778	258	0
ERS451417_02177	1717.62.peg.2203	NA	NA	NA	1	6	Cdiphtheriae_NCTC11397,"Cpseudotuberculosis_31","Cpseudotuberculosis_ATCC19410","Csilvaticum_KL0182","Culcerans_NCTC12077","Culcerans_NCTC7910"	0.16481	0.16481	2.86899	0.16481	0.16481	2.86899	258	0
ERS451417_00025	1717.62.peg.22	NA	NA	NA	1	32	Cargentoratense_DSM44202,"Catypicum_R2070","Caurimucosum_ATCC700975","Cbelfantii_FRC0043","Ccallunae_DSM20147","Cdeserti_GIMN1010","Cdiphtheriae_NCTC11397","Cdoosanense_DSM45436","Cefficiens_YS314","Cfalsenii_DSM44353","Cglutamicum_ATCC13032","Cglycinophilum_AJ3170","Chalotolerans_YIM70093","Cjeikeium_K41","Ckroppenstedtii_DSM44385","Ckutscheri_DSM20755","Cmustelae_DSM45274","Cpseudotuberculosis_…	0.191061	0.191061	1.48543	0.191061	0.191061	1.48543	3330	0
ERS451417_02388	1717.62.peg.2420	NA	NA	NA	1	28	Catypicum_R2070,"Cbelfantii_FRC0043","Ccallunae_DSM20147","Ccamporealensis_DSM44610","Cdeserti_GIMN1010","Cdiphtheriae_NCTC11397","Cdoosanense_DSM45436","Cefficiens_YS314","Cglutamicum_ATCC13032","Cglycinophilum_AJ3170","Chalotolerans_YIM70093","Chumireducens_DSM45392","Cimitans_DSM44264","Ckutscheri_DSM20755","Cmarinum_DSM44953","Cmaris_DSM45190","Cpseudotuberculosis_31","Cpseudotuberculosis_ATC…	0.330154	0.330154	1.97601	0.330154	0.330154	1.97601	2	1	1. 0.42289;2. 99;3. 295;4. 122;5. 99;6. 295;7. 115;8. 343;9. 235;10. L;11. TTG
ERS451417_00528	1717.62.peg.531	NA	NA	NA	1	9	Cbelfantii_FRC0043,"Cdiphtheriae_NCTC11397","Ckutscheri_DSM20755","Cpseudotuberculosis_31","Cpseudotuberculosis_ATCC19410","Crouxii_FRC0190","Culcerans_NCTC12077","Culcerans_NCTC7910","Cvitaeruminis_DSM20294"	0.153714	0.153714	2.81502	0.153704	0.153704	2.815	2306	0
ERS451417_02323	1717.62.peg.2350	NA	NA	NA	1	18	Catypicum_R2070,"Cbelfantii_FRC0043","Ccallunae_DSM20147","Cdiphtheriae_NCTC11397","Chalotolerans_YIM70093","Chumireducens_DSM45392","Ckutscheri_DSM20755","Cmarinum_DSM44953","Cmustelae_DSM45274","Cpseudotuberculosis_31","Cpseudotuberculosis_ATCC19410","CriegeliiPUDD83A45","Csilvaticum_KL0182","Ctestudinoris_DSM44614","Culcerans_NCTC12077","Culcerans_NCTC7910","Cureicelerivorans_IMMIBRIV2301","Cv…	0.301974	0.301974	1.32826	0.301974	0.301974	1.32826	3330	0
ERS451417_01701	1717.62.peg.1707	NA	NA	NA	1	8	Cbelfantii_FRC0043,"Cdiphtheriae_NCTC11397","Clactis_RW25","Cmustelae_DSM45274","Cpseudotuberculosis_ATCC19410","Csilvaticum_KL0182","Culcerans_NCTC12077","Culcerans_NCTC7910"	0.0738805	0.0738805	1.73753	0.0738805	0.0738805	1.73752	3330	0
ERS451417_00064	1717.62.peg.60	NA	NA	NA	1	10	Cbelfantii_FRC0043,"Cdiphtheriae_NCTC11397","Cimitans_DSM44264","Crouxii_FRC0190","Csilvaticum_KL0182","Csimulans_PES1","Csingulare_IBSB52218","Culcerans_NCTC12077","Culcerans_NCTC7910","Cureicelerivorans_IMMIBRIV2301"	0.267943	0.267943	1.78608	0.267943	0.267943	1.78608	258	0
ERS451417_02052	1717.62.peg.2064	NA	NA	NA	1	15	Cbelfantii_FRC0043,"Ccallunae_DSM20147","Cdeserti_GIMN1010","Cdiphtheriae_NCTC11397","Cefficiens_YS314","Cglutamicum_ATCC13032","Chalotolerans_YIM70093","Cmustelae_DSM45274","Cpseudotuberculosis_31","Cpseudotuberculosis_ATCC19410","Csilvaticum_KL0182","Ctestudinoris_DSM44614","Culcerans_NCTC12077","Culcerans_NCTC7910","Cvitaeruminis_DSM20294"	0.0791164	0.0791164	1.70838	0.0791164	0.0791164	1.70838	2	1	1. 0.45176;2. 28;3. 82;4. 36;5. 32;6. 94;7. 33;8. 97;9. 73;10. A;11. GCC
ERS451417_00029	1717.62.peg.26	NA	NA	NA	1	39	Cargentoratense_DSM44202,"Catypicum_R2070","Caurimucosum_ATCC700975","Cbelfantii_FRC0043","Ccallunae_DSM20147","Ccamporealensis_DSM44610","Cdeserti_GIMN1010","Cdiphtheriae_NCTC11397","Cdoosanense_DSM45436","Cefficiens_YS314","Cepidermidicanis_DSM45586","Cfalsenii_DSM44353","Cglutamicum_ATCC13032","Cglycinophilum_AJ3170","Chalotolerans_YIM70093","Chumireducens_DSM45392","Cimitans_DSM44264","Cjeike…	0.234253	0.234253	2.05299	0.234253	0.234253	2.05298	258	0
ERS451417_00521	1717.62.peg.525	NA	NA	NA	1	7	Cbelfantii_FRC0043,"Cdiphtheriae_NCTC11397","Cpseudotuberculosis_31","Cpseudotuberculosis_ATCC19410","Csilvaticum_KL0182","Culcerans_NCTC12077","Culcerans_NCTC7910"	0.226055	0.226055	4.07485	0.226055	0.226055	4.07486	2	1	1. 0.41858;2. 49;3. 145;4. 73;5. 59;6. 175;7. 59;8. 175;9. 130;10. V;11. GTT
ERS451417_01803	1717.62.peg.1809	NA	NA	NA	1	38	Cargentoratense_DSM44202,"Catypicum_R2070","Caurimucosum_ATCC700975","Cbelfantii_FRC0043","Ccallunae_DSM20147","Ccamporealensis_DSM44610","Cdeserti_GIMN1010","Cdiphtheriae_NCTC11397","Cdoosanense_DSM45436","Cefficiens_YS314","Cepidermidicanis_DSM45586","Cfalsenii_DSM44353","Cglutamicum_ATCC13032","Cglycinophilum_AJ3170","Chalotolerans_YIM70093","Chumireducens_DSM45392","Cimitans_DSM44264","Cjeike…	0.178795	0.178795	1.80236	0.178795	0.178795	1.80237	2	1	1. 0.55676;2. 118;3. 352;4. 131;5. 131;6. 391;7. 151;8. 451;9. 319;10. N;11. AAC
ERS451417_00075	1717.62.peg.72	NA	NA	NA	1	10	Cbelfantii_FRC0043,"Cdiphtheriae_NCTC11397","Cepidermidicanis_DSM45586","Clactis_RW25","Cpseudotuberculosis_31","Cpseudotuberculosis_ATCC19410","Crouxii_FRC0190","Csilvaticum_KL0182","Culcerans_NCTC12077","Culcerans_NCTC7910"	0.0931251	0.0931251	3.76123	0.0931251	0.0931251	3.76123	258	0
ERS451417_00200	1717.62.peg.197	NA	NA	NA	1	39	Cargentoratense_DSM44202,"Catypicum_R2070","Caurimucosum_ATCC700975","Cbelfantii_FRC0043","Ccallunae_DSM20147","Ccamporealensis_DSM44610","Cdeserti_GIMN1010","Cdiphtheriae_NCTC11397","Cdoosanense_DSM45436","Cefficiens_YS314","Cepidermidicanis_DSM45586","Cfalsenii_DSM44353","Cglutamicum_ATCC13032","Cglycinophilum_AJ3170","Chalotolerans_YIM70093","Chumireducens_DSM45392","Cimitans_DSM44264","Cjeike…	0.194221	0.194221	2.03233	0.194221	0.194221	2.03233	258	0
ERS451417_02149	1717.62.peg.2171	NA	NA	NA	1	7	Cbelfantii_FRC0043,"Cdiphtheriae_NCTC11397","Clactis_RW25","Cpseudotuberculosis_ATCC19410","Csilvaticum_KL0182","Culcerans_NCTC12077","Culcerans_NCTC7910"	0.0764101	0.0764101	2.66259	0.0764101	0.0764101	2.66258	2306	0
ERS451417_02313	1717.62.peg.2340	NA	NA	NA	1	38	Cargentoratense_DSM44202,"Catypicum_R2070","Caurimucosum_ATCC700975","Cbelfantii_FRC0043","Ccallunae_DSM20147","Ccamporealensis_DSM44610","Cdeserti_GIMN1010","Cdiphtheriae_NCTC11397","Cdoosanense_DSM45436","Cefficiens_YS314","Cepidermidicanis_DSM45586","Cfalsenii_DSM44353","Cglutamicum_ATCC13032","Cglycinophilum_AJ3170","Chalotolerans_YIM70093","Chumireducens_DSM45392","Cimitans_DSM44264","Cjeike…	0.263034	0.263034	1.64845	0.263034	0.263034	1.64845	258	0
ERS451417_02030	1717.62.peg.2035	NA	NA	NA	1	38	Cargentoratense_DSM44202,"Catypicum_R2070","Caurimucosum_ATCC700975","Cbelfantii_FRC0043","Ccallunae_DSM20147","Ccamporealensis_DSM44610","Cdeserti_GIMN1010","Cdiphtheriae_NCTC11397","Cdoosanense_DSM45436","Cefficiens_YS314","Cepidermidicanis_DSM45586","Cfalsenii_DSM44353","Cglutamicum_ATCC13032","Cglycinophilum_AJ3170","Chalotolerans_YIM70093","Chumireducens_DSM45392","Cimitans_DSM44264","Cjeike…	0.0738367	0.0738367	1.60277	0.0738367	0.0738367	1.60277	258	0
ERS451417_00848	1717.62.peg.853	NA	NA	NA	1	6	Cbelfantii_FRC0043,"Cdiphtheriae_NCTC11397","Cpseudotuberculosis_ATCC19410","Crouxii_FRC0190","Csilvaticum_KL0182","Culcerans_NCTC7910"	0.05855	0.05855	2.13026	0.05855	0.05855	2.13027	6146	2	1. 0.51738;2. 87;3. 259;4. 101;5. 87;6. 259;7. 87;8. 259;9. 166;10. G;11. GGT	1. 0.48433;2. 154;3. 460;4. 176;5. 154;6. 460;7. 154;8. 460;9. 367;10. T;11. ACT
ERS451417_01337	1717.62.peg.1345	NA	NA	NA	1	6	Cdiphtheriae_NCTC11397,"Cpseudotuberculosis_31","Cpseudotuberculosis_ATCC19410","Csilvaticum_KL0182","Culcerans_NCTC12077","Culcerans_NCTC7910"	0.443569	0.443569	4.25492	0.537603	0.438123	4.29365	2	3	1. 0.72426;2. 80;3. 238;4. 132;5. 91;6. 271;7. 91;8. 271;9. 208;10. T;11. ACA	1. 0.47636;2. 98;3. 292;4. 153;5. 109;6. 325;7. 109;8. 325;9. 262;10. T;11. ACA	1. 0.46335;2. 141;3. 421;4. 196;5. 152;6. 454;7. 152;8. 454;9. 391;10. T;11. ACT
ERS451417_00027	1717.62.peg.24	NA	NA	NA	1	32	Cargentoratense_DSM44202,"Catypicum_R2070","Caurimucosum_ATCC700975","Cbelfantii_FRC0043","Ccallunae_DSM20147","Cdeserti_GIMN1010","Cdiphtheriae_NCTC11397","Cdoosanense_DSM45436","Cefficiens_YS314","Cfalsenii_DSM44353","Cglutamicum_ATCC13032","Cglycinophilum_AJ3170","Chalotolerans_YIM70093","Cjeikeium_K41","Ckroppenstedtii_DSM44385","Ckutscheri_DSM20755","Cmustelae_DSM45274","Cpseudotuberculosis_…	0.205182	0.205182	1.94021	0.205182	0.205182	1.94021	258	0
ERS451417_01927	1717.62.peg.1924	NA	NA	NA	1	38	Cargentoratense_DSM44202,"Catypicum_R2070","Caurimucosum_ATCC700975","Cbelfantii_FRC0043","Ccallunae_DSM20147","Ccamporealensis_DSM44610","Cdeserti_GIMN1010","Cdiphtheriae_NCTC11397","Cdoosanense_DSM45436","Cefficiens_YS314","Cepidermidicanis_DSM45586","Cfalsenii_DSM44353","Cglutamicum_ATCC13032","Cglycinophilum_AJ3170","Chalotolerans_YIM70093","Chumireducens_DSM45392","Cimitans_DSM44264","Cjeike…	0.167014	0.167014	1.80007	0.167014	0.167014	1.80007	2	2	1. 0.5196;2. 337;3. 1009;4. 354;5. 354;6. 1060;7. 354;8. 1060;9. 979;10. I;11. ATC	1. 0.53275;2. 430;3. 1288;4. 447;5. 447;6. 1339;7. 447;8. 1339;9. 1258;10. L;11. CTC
ERS451417_02133	1717.62.peg.2153	NA	NA	NA	1	27	Catypicum_R2070,"Caurimucosum_ATCC700975","Cbelfantii_FRC0043","Ccamporealensis_DSM44610","Cdeserti_GIMN1010","Cdiphtheriae_NCTC11397","Cdoosanense_DSM45436","Cfalsenii_DSM44353","Cglutamicum_ATCC13032","Cglycinophilum_AJ3170","Chalotolerans_YIM70093","Chumireducens_DSM45392","Cimitans_DSM44264","Cjeikeium_K41","Clactis_RW25","Cmarinum_DSM44953","Cmaris_DSM45190","Cpseudotuberculosis_31","Cpseudo…	0.188787	0.188541	1.75911	0.18856	0.18856	1.75972	258	0
ERS451417_00980	1717.62.peg.990	NA	NA	NA	1	35	Cargentoratense_DSM44202,"Catypicum_R2070","Caurimucosum_ATCC700975","Cbelfantii_FRC0043","Ccallunae_DSM20147","Ccamporealensis_DSM44610","Cdeserti_GIMN1010","Cdiphtheriae_NCTC11397","Cdoosanense_DSM45436","Cefficiens_YS314","Cepidermidicanis_DSM45586","Cfalsenii_DSM44353","Cglutamicum_ATCC13032","Cglycinophilum_AJ3170","Chalotolerans_YIM70093","Chumireducens_DSM45392","Cjeikeium_K41","Ckroppenst…	0.197703	0.156667	1.63913	0.197703	0.156667	1.63913	2050	2	1. 0.53256;2. 92;3. 274;4. 101;5. 97;6. 289;7. 111;8. 331;9. 127;10. D;11. GAC	1. 0.55237;2. 306;3. 916;4. 322;5. 314;6. 940;7. 329;8. 985;9. 691;10. A;11. GCA
ERS451417_00661	1717.62.peg.665	NA	NA	NA	1	36	Catypicum_R2070,"Caurimucosum_ATCC700975","Cbelfantii_FRC0043","Ccallunae_DSM20147","Ccamporealensis_DSM44610","Cdeserti_GIMN1010","Cdiphtheriae_NCTC11397","Cdoosanense_DSM45436","Cefficiens_YS314","Cepidermidicanis_DSM45586","Cfalsenii_DSM44353","Cglutamicum_ATCC13032","Chalotolerans_YIM70093","Chumireducens_DSM45392","Cimitans_DSM44264","Cjeikeium_K41","Ckroppenstedtii_DSM44385","Ckutscheri_DSM…	0.248735	0.248735	1.556	0.248735	0.248735	1.556	3330	0
ERS451417_01180	1717.62.peg.1189	NA	NA	NA	1	39	Cargentoratense_DSM44202,"Catypicum_R2070","Caurimucosum_ATCC700975","Cbelfantii_FRC0043","Ccallunae_DSM20147","Ccamporealensis_DSM44610","Cdeserti_GIMN1010","Cdiphtheriae_NCTC11397","Cdoosanense_DSM45436","Cefficiens_YS314","Cepidermidicanis_DSM45586","Cfalsenii_DSM44353","Cglutamicum_ATCC13032","Cglycinophilum_AJ3170","Chalotolerans_YIM70093","Chumireducens_DSM45392","Cimitans_DSM44264","Cjeike…	0.221505	0.221505	1.71899	0.221505	0.221505	1.71899	2306	0
ERS451417_02402	1717.62.peg.2434	NA	NA	NA	1	35	Cargentoratense_DSM44202,"Catypicum_R2070","Caurimucosum_ATCC700975","Cbelfantii_FRC0043","Ccallunae_DSM20147","Ccamporealensis_DSM44610","Cdeserti_GIMN1010","Cdiphtheriae_NCTC11397","Cefficiens_YS314","Cepidermidicanis_DSM45586","Cfalsenii_DSM44353","Cglutamicum_ATCC13032","Cglycinophilum_AJ3170","Chalotolerans_YIM70093","Chumireducens_DSM45392","Cimitans_DSM44264","Cjeikeium_K41","Ckroppenstedt…	0.106226	0.106226	1.64778	0.106226	0.106226	1.64778	3330	0
ERS451417_01830	1717.62.peg.1834	NA	NA	NA	1	36	Cargentoratense_DSM44202,"Catypicum_R2070","Caurimucosum_ATCC700975","Cbelfantii_FRC0043","Ccallunae_DSM20147","Ccamporealensis_DSM44610","Cdeserti_GIMN1010","Cdiphtheriae_NCTC11397","Cdoosanense_DSM45436","Cefficiens_YS314","Cepidermidicanis_DSM45586","Cfalsenii_DSM44353","Cglutamicum_ATCC13032","Cglycinophilum_AJ3170","Chalotolerans_YIM70093","Chumireducens_DSM45392","Cimitans_DSM44264","Cjeike…	0.172574	0.172574	1.66684	0.172574	0.172574	1.66684	3330	0
ERS451417_00893	1717.62.peg.899	NA	NA	NA	1	23	Catypicum_R2070,"Caurimucosum_ATCC700975","Cbelfantii_FRC0043","Cdiphtheriae_NCTC11397","Cfalsenii_DSM44353","Cglycinophilum_AJ3170","Cimitans_DSM44264","Cjeikeium_K41","Ckroppenstedtii_DSM44385","Ckutscheri_DSM20755","Clactis_RW25","Cpseudotuberculosis_31","Cpseudotuberculosis_ATCC19410","CriegeliiPUDD83A45","Crouxii_FRC0190","Csilvaticum_KL0182","Csimulans_PES1","Csingulare_IBSB52218","Cterpeno…	0.184114	0.184114	1.91417	0.184114	0.184114	1.91418	2	1	1. 0.40914;2. 204;3. 610;4. 207;5. 207;6. 619;7. 228;8. 682;9. 553;10. E;11. GAA
ERS451417_00460	1717.62.peg.464	NA	NA	NA	1	39	Cargentoratense_DSM44202,"Catypicum_R2070","Caurimucosum_ATCC700975","Cbelfantii_FRC0043","Ccallunae_DSM20147","Ccamporealensis_DSM44610","Cdeserti_GIMN1010","Cdiphtheriae_NCTC11397","Cdoosanense_DSM45436","Cefficiens_YS314","Cepidermidicanis_DSM45586","Cfalsenii_DSM44353","Cglutamicum_ATCC13032","Cglycinophilum_AJ3170","Chalotolerans_YIM70093","Chumireducens_DSM45392","Cimitans_DSM44264","Cjeike…	0.0963654	0.0963654	1.78676	0.0963654	0.0963654	1.78677	1282	0
ERS451417_01623	1717.62.peg.1631	NA	NA	NA	1	38	Cargentoratense_DSM44202,"Catypicum_R2070","Caurimucosum_ATCC700975","Cbelfantii_FRC0043","Ccallunae_DSM20147","Ccamporealensis_DSM44610","Cdeserti_GIMN1010","Cdiphtheriae_NCTC11397","Cdoosanense_DSM45436","Cefficiens_YS314","Cepidermidicanis_DSM45586","Cfalsenii_DSM44353","Cglutamicum_ATCC13032","Cglycinophilum_AJ3170","Chalotolerans_YIM70093","Chumireducens_DSM45392","Cimitans_DSM44264","Cjeike…	0.114367	0.114367	1.63105	0.114367	0.114367	1.63105	258	0
ERS451417_01441	1717.62.peg.1448	NA	NA	NA	1	28	Cargentoratense_DSM44202,"Caurimucosum_ATCC700975","Cbelfantii_FRC0043","Cdiphtheriae_NCTC11397","Cepidermidicanis_DSM45586","Cglycinophilum_AJ3170","Chalotolerans_YIM70093","Chumireducens_DSM45392","Cimitans_DSM44264","Ckroppenstedtii_DSM44385","Ckutscheri_DSM20755","Clactis_RW25","Cmarinum_DSM44953","Cmaris_DSM45190","Cmustelae_DSM45274","Cpseudotuberculosis_31","Cpseudotuberculosis_ATCC19410",…	0.213237	0.213237	1.58226	0.213237	0.213237	1.58225	258	0
ERS451417_00819	1717.62.peg.825	NA	NA	NA	1	8	Cbelfantii_FRC0043,"Cdiphtheriae_NCTC11397","Cpseudotuberculosis_31","Cpseudotuberculosis_ATCC19410","Crouxii_FRC0190","Csilvaticum_KL0182","Culcerans_NCTC12077","Culcerans_NCTC7910"	0.0606941	0.0606941	2.50404	0.0606941	0.0606941	2.50404	258	0
ERS451417_02322	1717.62.peg.2349	NA	NA	NA	1	11	Cbelfantii_FRC0043,"Cdiphtheriae_NCTC11397","Cepidermidicanis_DSM45586","Ckutscheri_DSM20755","Cmustelae_DSM45274","Cpseudotuberculosis_31","Cpseudotuberculosis_ATCC19410","Csilvaticum_KL0182","Culcerans_NCTC12077","Culcerans_NCTC7910","Cvitaeruminis_DSM20294"	0.313614	0.280072	2.32058	0.313614	0.280072	2.32058	2050	2	1. 0.51218;2. 79;3. 235;4. 118;5. 81;6. 241;7. 89;8. 265;9. 22;10. V;11. GTG	1. 0.59636;2. 121;3. 361;4. 175;5. 123;6. 367;7. 131;8. 391;9. 148;10. H;11. CAC
ERS451417_00285	1717.62.peg.286	NA	NA	NA	1	29	Cargentoratense_DSM44202,"Caurimucosum_ATCC700975","Cbelfantii_FRC0043","Ccallunae_DSM20147","Ccamporealensis_DSM44610","Cdeserti_GIMN1010","Cdiphtheriae_NCTC11397","Cdoosanense_DSM45436","Cefficiens_YS314","Cglutamicum_ATCC13032","Chumireducens_DSM45392","Cimitans_DSM44264","Ckutscheri_DSM20755","Cmarinum_DSM44953","Cmaris_DSM45190","Cmustelae_DSM45274","Cpseudotuberculosis_31","Cpseudotuberculo…	0.279472	0.246203	1.78147	0.279472	0.246203	1.78147	3074	2	1. 0.65724;2. 22;3. 64;4. 35;5. 29;6. 85;7. 45;8. 133;9. 40;10. N;11. AAC	1. 0.65334;2. 132;3. 394;4. 156;5. 144;6. 430;7. 166;8. 496;9. 319;10. H;11. CAT
ERS451417_00954	1717.62.peg.961	NA	NA	NA	1	39	Cargentoratense_DSM44202,"Catypicum_R2070","Caurimucosum_ATCC700975","Cbelfantii_FRC0043","Ccallunae_DSM20147","Ccamporealensis_DSM44610","Cdeserti_GIMN1010","Cdiphtheriae_NCTC11397","Cdoosanense_DSM45436","Cefficiens_YS314","Cepidermidicanis_DSM45586","Cfalsenii_DSM44353","Cglutamicum_ATCC13032","Cglycinophilum_AJ3170","Chalotolerans_YIM70093","Chumireducens_DSM45392","Cimitans_DSM44264","Cjeike…	0.0837682	0.0837682	1.75908	0.0837682	0.0837682	1.75909	1282	0
ERS451417_00238	1717.62.peg.234	NA	NA	NA	1	37	Cargentoratense_DSM44202,"Catypicum_R2070","Caurimucosum_ATCC700975","Cbelfantii_FRC0043","Ccallunae_DSM20147","Ccamporealensis_DSM44610","Cdeserti_GIMN1010","Cdiphtheriae_NCTC11397","Cdoosanense_DSM45436","Cepidermidicanis_DSM45586","Cfalsenii_DSM44353","Cglutamicum_ATCC13032","Cglycinophilum_AJ3170","Chalotolerans_YIM70093","Chumireducens_DSM45392","Cimitans_DSM44264","Cjeikeium_K41","Ckroppens…	0.14966	0.14966	1.49498	0.14966	0.14966	1.49498	3330	0
ERS451417_00735	1717.62.peg.738	NA	NA	NA	1	9	Catypicum_R2070,"Cbelfantii_FRC0043","Cdiphtheriae_NCTC11397","Cpseudotuberculosis_31","Cpseudotuberculosis_ATCC19410","Crouxii_FRC0190","Csilvaticum_KL0182","Culcerans_NCTC12077","Culcerans_NCTC7910"	0.198245	0.198245	2.77054	0.198245	0.198245	2.77054	258	0
ERS451417_01736	1717.62.peg.1740	NA	NA	NA	1	38	Cargentoratense_DSM44202,"Catypicum_R2070","Caurimucosum_ATCC700975","Cbelfantii_FRC0043","Ccallunae_DSM20147","Ccamporealensis_DSM44610","Cdeserti_GIMN1010","Cdiphtheriae_NCTC11397","Cdoosanense_DSM45436","Cefficiens_YS314","Cepidermidicanis_DSM45586","Cfalsenii_DSM44353","Cglutamicum_ATCC13032","Cglycinophilum_AJ3170","Chalotolerans_YIM70093","Chumireducens_DSM45392","Cimitans_DSM44264","Cjeike…	0.184723	0.184723	1.78793	0.184723	0.184723	1.78793	2306	0
ERS451417_00943	1717.62.peg.950	NA	NA	NA	1	14	Catypicum_R2070,"Cbelfantii_FRC0043","Cdiphtheriae_NCTC11397","Cepidermidicanis_DSM45586","Ckutscheri_DSM20755","Clactis_RW25","Cpseudotuberculosis_31","Cpseudotuberculosis_ATCC19410","Crouxii_FRC0190","Csilvaticum_KL0182","Culcerans_NCTC12077","Culcerans_NCTC7910","Cuterequi_DSM45634","Cvitaeruminis_DSM20294"	0.147569	0.147569	1.95955	0.147569	0.147569	1.95955	258	0
ERS451417_00965	1717.62.peg.972	NA	NA	NA	1	39	Cargentoratense_DSM44202,"Catypicum_R2070","Caurimucosum_ATCC700975","Cbelfantii_FRC0043","Ccallunae_DSM20147","Ccamporealensis_DSM44610","Cdeserti_GIMN1010","Cdiphtheriae_NCTC11397","Cdoosanense_DSM45436","Cefficiens_YS314","Cepidermidicanis_DSM45586","Cfalsenii_DSM44353","Cglutamicum_ATCC13032","Cglycinophilum_AJ3170","Chalotolerans_YIM70093","Chumireducens_DSM45392","Cimitans_DSM44264","Cjeike…	0.122718	0.122718	1.70762	0.122718	0.122718	1.70762	3330	0
ERS451417_00729	1717.62.peg.732	NA	NA	NA	1	15	Cargentoratense_DSM44202,"Cbelfantii_FRC0043","Cdiphtheriae_NCTC11397","Cepidermidicanis_DSM45586","Ckroppenstedtii_DSM44385","Ckutscheri_DSM20755","Clactis_RW25","Cmustelae_DSM45274","Cpseudotuberculosis_31","Cpseudotuberculosis_ATCC19410","Crouxii_FRC0190","Csilvaticum_KL0182","Culcerans_NCTC12077","Culcerans_NCTC7910","Cvitaeruminis_DSM20294"	0.243228	0.161737	2.45782	0.243228	0.161737	2.45782	3074	1	1. 0.73709;2. 38;3. 112;4. 71;5. 71;6. 211;7. 71;8. 211;9. 100;10. E;11. GAG
ERS451417_01597	1717.62.peg.1606	NA	NA	NA	1	19	Cargentoratense_DSM44202,"Cbelfantii_FRC0043","Ccallunae_DSM20147","Cdeserti_GIMN1010","Cdiphtheriae_NCTC11397","Cefficiens_YS314","Cepidermidicanis_DSM45586","Cglutamicum_ATCC13032","Chalotolerans_YIM70093","Chumireducens_DSM45392","Ckutscheri_DSM20755","Cmarinum_DSM44953","Cpseudotuberculosis_31","Cpseudotuberculosis_ATCC19410","Csilvaticum_KL0182","Ctestudinoris_DSM44614","Culcerans_NCTC12077"…	0.709818	0.271067	2.14993	0.388439	0.271066	2.14993	1282	0
ERS451417_01231	1717.62.peg.1239	NA	NA	NA	1	13	Cargentoratense_DSM44202,"Cbelfantii_FRC0043","Cdiphtheriae_NCTC11397","Cepidermidicanis_DSM45586","Ckutscheri_DSM20755","Cmustelae_DSM45274","Cpseudotuberculosis_31","Cpseudotuberculosis_ATCC19410","Crouxii_FRC0190","Csilvaticum_KL0182","Culcerans_NCTC12077","Culcerans_NCTC7910","Cvitaeruminis_DSM20294"	0.183996	0.183996	2.33671	0.183996	0.183996	2.33671	3330	0
ERS451417_02289	1717.62.peg.2318	NA	NA	NA	1	37	Cargentoratense_DSM44202,"Catypicum_R2070","Caurimucosum_ATCC700975","Cbelfantii_FRC0043","Ccallunae_DSM20147","Ccamporealensis_DSM44610","Cdeserti_GIMN1010","Cdiphtheriae_NCTC11397","Cdoosanense_DSM45436","Cefficiens_YS314","Cepidermidicanis_DSM45586","Cfalsenii_DSM44353","Cglutamicum_ATCC13032","Cglycinophilum_AJ3170","Chalotolerans_YIM70093","Chumireducens_DSM45392","Cimitans_DSM44264","Cjeike…	0.0532431	0.0532431	1.79155	0.0532333	0.0532333	1.79156	3330	0
ERS451417_01807	1717.62.peg.1813	NA	NA	NA	1	38	Cargentoratense_DSM44202,"Catypicum_R2070","Caurimucosum_ATCC700975","Cbelfantii_FRC0043","Ccallunae_DSM20147","Ccamporealensis_DSM44610","Cdeserti_GIMN1010","Cdiphtheriae_NCTC11397","Cdoosanense_DSM45436","Cefficiens_YS314","Cepidermidicanis_DSM45586","Cfalsenii_DSM44353","Cglutamicum_ATCC13032","Cglycinophilum_AJ3170","Chalotolerans_YIM70093","Chumireducens_DSM45392","Cimitans_DSM44264","Cjeike…	0.357176	0.0802115	1.59022	0.168579	0.0802017	1.5902	258	0
ERS451417_00986	1717.62.peg.997	NA	NA	NA	1	39	Cargentoratense_DSM44202,"Catypicum_R2070","Caurimucosum_ATCC700975","Cbelfantii_FRC0043","Ccallunae_DSM20147","Ccamporealensis_DSM44610","Cdeserti_GIMN1010","Cdiphtheriae_NCTC11397","Cdoosanense_DSM45436","Cefficiens_YS314","Cepidermidicanis_DSM45586","Cfalsenii_DSM44353","Cglutamicum_ATCC13032","Cglycinophilum_AJ3170","Chalotolerans_YIM70093","Chumireducens_DSM45392","Cimitans_DSM44264","Cjeike…	0.182682	0.182682	1.64048	0.182682	0.182682	1.64048	1026	1	1. 0.51806;2. 37;3. 109;4. 83;5. 83;6. 247;7. 285;8. 853;9. 76;10. E;11. GAG
ERS451417_01808	1717.62.peg.1814	NA	NA	NA	1	38	Cargentoratense_DSM44202,"Catypicum_R2070","Caurimucosum_ATCC700975","Cbelfantii_FRC0043","Ccallunae_DSM20147","Ccamporealensis_DSM44610","Cdeserti_GIMN1010","Cdiphtheriae_NCTC11397","Cdoosanense_DSM45436","Cefficiens_YS314","Cepidermidicanis_DSM45586","Cfalsenii_DSM44353","Cglutamicum_ATCC13032","Cglycinophilum_AJ3170","Chalotolerans_YIM70093","Chumireducens_DSM45392","Cimitans_DSM44264","Cjeike…	0.0414766	0.0414766	1.52518	0.0414766	0.0414766	1.52518	3330	0
ERS451417_01358	1717.62.peg.1366	NA	NA	NA	1	8	Cbelfantii_FRC0043,"Cdiphtheriae_NCTC11397","Cmustelae_DSM45274","Cpseudotuberculosis_31","Cpseudotuberculosis_ATCC19410","Csilvaticum_KL0182","Culcerans_NCTC12077","Culcerans_NCTC7910"	0.200692	0.187203	3.15631	0.200702	0.187204	3.15631	2	2	1. 0.67707;2. 82;3. 244;4. 124;5. 83;6. 247;7. 85;8. 253;9. 175;10. L;11. CTA	1. 0.50689;2. 159;3. 475;4. 205;5. 161;6. 481;7. 163;8. 487;9. 403;10. D;11. GAT
ERS451417_01158	1717.62.peg.1169	NA	NA	NA	1	39	Cargentoratense_DSM44202,"Catypicum_R2070","Caurimucosum_ATCC700975","Cbelfantii_FRC0043","Ccallunae_DSM20147","Ccamporealensis_DSM44610","Cdeserti_GIMN1010","Cdiphtheriae_NCTC11397","Cdoosanense_DSM45436","Cefficiens_YS314","Cepidermidicanis_DSM45586","Cfalsenii_DSM44353","Cglutamicum_ATCC13032","Cglycinophilum_AJ3170","Chalotolerans_YIM70093","Chumireducens_DSM45392","Cimitans_DSM44264","Cjeike…	0.151354	0.151354	1.74644	0.151354	0.151354	1.74644	258	0
ERS451417_01490	1717.62.peg.1498	NA	NA	NA	1	36	Cargentoratense_DSM44202,"Catypicum_R2070","Caurimucosum_ATCC700975","Cbelfantii_FRC0043","Ccallunae_DSM20147","Ccamporealensis_DSM44610","Cdeserti_GIMN1010","Cdiphtheriae_NCTC11397","Cdoosanense_DSM45436","Cefficiens_YS314","Cepidermidicanis_DSM45586","Cfalsenii_DSM44353","Cglutamicum_ATCC13032","Cglycinophilum_AJ3170","Chalotolerans_YIM70093","Chumireducens_DSM45392","Cimitans_DSM44264","Cjeike…	0.179392	0.179392	1.70349	0.179392	0.179392	1.70349	2306	0
ERS451417_01483	1717.62.peg.1492	NA	NA	NA	1	22	Caurimucosum_ATCC700975,"Cbelfantii_FRC0043","Ccallunae_DSM20147","Cdeserti_GIMN1010","Cdiphtheriae_NCTC11397","Cdoosanense_DSM45436","Cefficiens_YS314","Cepidermidicanis_DSM45586","Cglutamicum_ATCC13032","Chumireducens_DSM45392","Ckutscheri_DSM20755","Cmarinum_DSM44953","Cmustelae_DSM45274","Cpseudotuberculosis_ATCC19410","Csilvaticum_KL0182","Csimulans_PES1","Csingulare_IBSB52218","Ctestudinori…	0.388474	0.388474	2.07297	0.388474	0.388474	2.07297	258	0
ERS451417_01929	1717.62.peg.1926	NA	NA	NA	1	26	Catypicum_R2070,"Caurimucosum_ATCC700975","Cbelfantii_FRC0043","Ccallunae_DSM20147","Ccamporealensis_DSM44610","Cdeserti_GIMN1010","Cdiphtheriae_NCTC11397","Cdoosanense_DSM45436","Cefficiens_YS314","Cepidermidicanis_DSM45586","Cglutamicum_ATCC13032","Cglycinophilum_AJ3170","Chalotolerans_YIM70093","Chumireducens_DSM45392","Ckroppenstedtii_DSM44385","Clactis_RW25","Cmarinum_DSM44953","Cmaris_DSM45…	0.179406	0.179406	1.67005	0.179406	0.179406	1.67004	7426	0
ERS451417_00549	1717.62.peg.553	NA	NA	NA	1	12	Cargentoratense_DSM44202,"Cbelfantii_FRC0043","Cdiphtheriae_NCTC11397","Clactis_RW25","Cmustelae_DSM45274","Cpseudotuberculosis_ATCC19410","Crouxii_FRC0190","Csilvaticum_KL0182","Csimulans_PES1","Culcerans_NCTC12077","Culcerans_NCTC7910","Curealyticum_DSM7109"	0.186328	0.186328	2.24183	0.186328	0.186328	2.24182	258	0
ERS451417_00757	1717.62.peg.762	NA	NA	NA	1	39	Cargentoratense_DSM44202,"Catypicum_R2070","Caurimucosum_ATCC700975","Cbelfantii_FRC0043","Ccallunae_DSM20147","Ccamporealensis_DSM44610","Cdeserti_GIMN1010","Cdiphtheriae_NCTC11397","Cdoosanense_DSM45436","Cefficiens_YS314","Cepidermidicanis_DSM45586","Cfalsenii_DSM44353","Cglutamicum_ATCC13032","Cglycinophilum_AJ3170","Chalotolerans_YIM70093","Chumireducens_DSM45392","Cimitans_DSM44264","Cjeike…	0.156833	0.156833	2.32822	0.156833	0.156833	2.3282	258	0
ERS451417_00096	1717.62.peg.94	NA	NA	NA	1	11	Cbelfantii_FRC0043,"Cdiphtheriae_NCTC11397","Chalotolerans_YIM70093","Cmustelae_DSM45274","Cpseudotuberculosis_31","Cpseudotuberculosis_ATCC19410","Crouxii_FRC0190","Csilvaticum_KL0182","Culcerans_NCTC12077","Culcerans_NCTC7910","Cvitaeruminis_DSM20294"	0.132466	0.132466	2.49272	0.132466	0.132466	2.49272	258	0
ERS451417_01286	1717.62.peg.1294	NA	NA	NA	1	33	Catypicum_R2070,"Caurimucosum_ATCC700975","Cbelfantii_FRC0043","Ccallunae_DSM20147","Ccamporealensis_DSM44610","Cdiphtheriae_NCTC11397","Cdoosanense_DSM45436","Cefficiens_YS314","Cepidermidicanis_DSM45586","Cfalsenii_DSM44353","Cglutamicum_ATCC13032","Cglycinophilum_AJ3170","Chalotolerans_YIM70093","Cimitans_DSM44264","Cjeikeium_K41","Ckutscheri_DSM20755","Clactis_RW25","Cmarinum_DSM44953","Cmari…	0.250609	0.250609	1.8486	0.250609	0.250609	1.8486	258	0
ERS451417_02321	1717.62.peg.2348	NA	NA	NA	1	22	Catypicum_R2070,"Cbelfantii_FRC0043","Ccamporealensis_DSM44610","Cdeserti_GIMN1010","Cdiphtheriae_NCTC11397","Cefficiens_YS314","Cepidermidicanis_DSM45586","Cglutamicum_ATCC13032","Chalotolerans_YIM70093","Chumireducens_DSM45392","Cmarinum_DSM44953","Cmaris_DSM45190","Cmustelae_DSM45274","Cpseudotuberculosis_31","Cpseudotuberculosis_ATCC19410","Csilvaticum_KL0182","Csimulans_PES1","Csingulare_IBS…	0.154601	0.154601	1.68188	0.154601	0.154601	1.68188	7426	0
ERS451417_01970	1717.62.peg.1970	NA	NA	NA	1	7	Cbelfantii_FRC0043,"Cdiphtheriae_NCTC11397","Cpseudotuberculosis_31","Cpseudotuberculosis_ATCC19410","Csilvaticum_KL0182","Culcerans_NCTC12077","Culcerans_NCTC7910"	0.354271	0.354271	3.83842	0.354271	0.354271	3.83851	258	0
ERS451417_01802	1717.62.peg.1808	NA	NA	NA	1	38	Cargentoratense_DSM44202,"Catypicum_R2070","Caurimucosum_ATCC700975","Cbelfantii_FRC0043","Ccallunae_DSM20147","Ccamporealensis_DSM44610","Cdeserti_GIMN1010","Cdiphtheriae_NCTC11397","Cdoosanense_DSM45436","Cefficiens_YS314","Cepidermidicanis_DSM45586","Cfalsenii_DSM44353","Cglutamicum_ATCC13032","Cglycinophilum_AJ3170","Chalotolerans_YIM70093","Chumireducens_DSM45392","Cimitans_DSM44264","Cjeike…	0.135252	0.135252	1.807	0.135252	0.135252	1.80699	258	0
ERS451417_00590	1717.62.peg.593	NA	NA	NA	1	14	Cbelfantii_FRC0043,"Ccallunae_DSM20147","Cdeserti_GIMN1010","Cdiphtheriae_NCTC11397","Cefficiens_YS314","Cglutamicum_ATCC13032","Chalotolerans_YIM70093","Cmustelae_DSM45274","Cpseudotuberculosis_ATCC19410","Crouxii_FRC0190","Csilvaticum_KL0182","Culcerans_NCTC12077","Culcerans_NCTC7910","Cvitaeruminis_DSM20294"	0.0727111	0.0727111	2.20081	0.0727111	0.0727111	2.20081	2	2	1. 0.47928;2. 160;3. 478;4. 202;5. 160;6. 478;7. 185;8. 553;9. 403;10. Q;11. CAA	1. 0.41536;2. 162;3. 484;4. 204;5. 162;6. 484;7. 187;8. 559;9. 409;10. T;11. ACA
ERS451417_00801	1717.62.peg.808	NA	NA	NA	1	37	Cargentoratense_DSM44202,"Catypicum_R2070","Caurimucosum_ATCC700975","Cbelfantii_FRC0043","Ccallunae_DSM20147","Ccamporealensis_DSM44610","Cdeserti_GIMN1010","Cdiphtheriae_NCTC11397","Cdoosanense_DSM45436","Cepidermidicanis_DSM45586","Cfalsenii_DSM44353","Cglutamicum_ATCC13032","Cglycinophilum_AJ3170","Chalotolerans_YIM70093","Chumireducens_DSM45392","Cimitans_DSM44264","Cjeikeium_K41","Ckroppens…	0.354584	0.354584	1.56269	0.354584	0.354584	1.56269	1282	0
ERS451417_00481	1717.62.peg.484	NA	NA	NA	1	39	Cargentoratense_DSM44202,"Catypicum_R2070","Caurimucosum_ATCC700975","Cbelfantii_FRC0043","Ccallunae_DSM20147","Ccamporealensis_DSM44610","Cdeserti_GIMN1010","Cdiphtheriae_NCTC11397","Cdoosanense_DSM45436","Cefficiens_YS314","Cepidermidicanis_DSM45586","Cfalsenii_DSM44353","Cglutamicum_ATCC13032","Cglycinophilum_AJ3170","Chalotolerans_YIM70093","Chumireducens_DSM45392","Cimitans_DSM44264","Cjeike…	0.317894	0.0879688	2.01101	0.200966	0.0879588	2.01101	258	0
ERS451417_00455	1717.62.peg.459	NA	NA	NA	1	30	Caurimucosum_ATCC700975,"Cbelfantii_FRC0043","Ccallunae_DSM20147","Ccamporealensis_DSM44610","Cdeserti_GIMN1010","Cdiphtheriae_NCTC11397","Cefficiens_YS314","Cepidermidicanis_DSM45586","Cglutamicum_ATCC13032","Cglycinophilum_AJ3170","Chalotolerans_YIM70093","Chumireducens_DSM45392","Ckroppenstedtii_DSM44385","Ckutscheri_DSM20755","Cmarinum_DSM44953","Cmaris_DSM45190","Cmustelae_DSM45274","Cpseudo…	0.288594	0.229279	1.92528	0.288594	0.229279	1.92528	3074	1	1. 0.77585;2. 46;3. 136;4. 51;5. 51;6. 151;7. 56;8. 166;9. 46;10. I;11. ATT
ERS451417_00807	1717.62.peg.814	NA	NA	NA	1	23	Catypicum_R2070,"Caurimucosum_ATCC700975","Cbelfantii_FRC0043","Ccallunae_DSM20147","Ccamporealensis_DSM44610","Cdeserti_GIMN1010","Cdiphtheriae_NCTC11397","Cdoosanense_DSM45436","Cefficiens_YS314","Cepidermidicanis_DSM45586","Cglutamicum_ATCC13032","Chalotolerans_YIM70093","Chumireducens_DSM45392","Cmarinum_DSM44953","Cmaris_DSM45190","Cpseudotuberculosis_ATCC19410","Crouxii_FRC0190","Csilvaticu…	0.371316	0.371316	1.9245	0.371316	0.371316	1.9245	2306	0
ERS451417_02151	1717.62.peg.2173	NA	NA	NA	1	8	Cbelfantii_FRC0043,"Cdiphtheriae_NCTC11397","Clactis_RW25","Cpseudotuberculosis_31","Cpseudotuberculosis_ATCC19410","Csilvaticum_KL0182","Culcerans_NCTC12077","Culcerans_NCTC7910"	0.0991991	0.0991991	2.52373	0.0991991	0.0991991	2.52373	2	1	1. 0.56915;2. 471;3. 1411;4. 543;5. 487;6. 1459;7. 507;8. 1519;9. 1222;10. E;11. GAA
ERS451417_00670	1717.62.peg.677	NA	NA	NA	1	16	Cargentoratense_DSM44202,"Cbelfantii_FRC0043","Cdiphtheriae_NCTC11397","Cefficiens_YS314","Cepidermidicanis_DSM45586","Ckroppenstedtii_DSM44385","Ckutscheri_DSM20755","Clactis_RW25","Cmustelae_DSM45274","Cpseudotuberculosis_31","Cpseudotuberculosis_ATCC19410","Crouxii_FRC0190","Csilvaticum_KL0182","Culcerans_NCTC12077","Culcerans_NCTC7910","Cvitaeruminis_DSM20294"	0.0865108	0.0865108	2.18708	0.0865108	0.0865108	2.18709	258	0
ERS451417_01989	1717.62.peg.1990	NA	NA	NA	1	7	Cbelfantii_FRC0043,"Cdiphtheriae_NCTC11397","Cpseudotuberculosis_31","Cpseudotuberculosis_ATCC19410","Csilvaticum_KL0182","Culcerans_NCTC12077","Culcerans_NCTC7910"	0.0936937	0.0936937	3.25252	0.0936937	0.0936937	3.25252	2	1	1. 0.41723;2. 17;3. 49;4. 49;5. 49;6. 145;7. 49;8. 145;9. 46;10. I;11. ATT
ERS451417_00859	1717.62.peg.864	NA	NA	NA	1	20	Cbelfantii_FRC0043,"Ccallunae_DSM20147","Cdeserti_GIMN1010","Cdiphtheriae_NCTC11397","Cdoosanense_DSM45436","Cefficiens_YS314","Cepidermidicanis_DSM45586","Chalotolerans_YIM70093","Chumireducens_DSM45392","Cimitans_DSM44264","Cmarinum_DSM44953","Cmaris_DSM45190","Cpseudotuberculosis_31","Cpseudotuberculosis_ATCC19410","Crouxii_FRC0190","Csilvaticum_KL0182","Ctestudinoris_DSM44614","Culcerans_NCTC…	0.344722	0.344722	1.49623	0.344722	0.344722	1.49623	258	0
ERS451417_01341	1717.62.peg.1349	NA	NA	NA	1	35	Cargentoratense_DSM44202,"Catypicum_R2070","Caurimucosum_ATCC700975","Cbelfantii_FRC0043","Ccallunae_DSM20147","Ccamporealensis_DSM44610","Cdeserti_GIMN1010","Cdiphtheriae_NCTC11397","Cdoosanense_DSM45436","Cefficiens_YS314","Cepidermidicanis_DSM45586","Cfalsenii_DSM44353","Cglutamicum_ATCC13032","Cglycinophilum_AJ3170","Chalotolerans_YIM70093","Chumireducens_DSM45392","Cimitans_DSM44264","Ckropp…	0.160481	0.160481	1.45543	0.160481	0.160481	1.45543	3074	2	1. 0.44832;2. 269;3. 805;4. 316;5. 313;6. 937;7. 369;8. 1105;9. 547;10. T;11. ACT	1. 0.45049;2. 285;3. 853;4. 332;5. 329;6. 985;7. 385;8. 1153;9. 595;10. A;11. GCT
ERS451417_00446	1717.62.peg.449	NA	NA	NA	1	19	Caurimucosum_ATCC700975,"Cbelfantii_FRC0043","Ccallunae_DSM20147","Ccamporealensis_DSM44610","Cdeserti_GIMN1010","Cdiphtheriae_NCTC11397","Cepidermidicanis_DSM45586","Cglutamicum_ATCC13032","Ckroppenstedtii_DSM44385","Ckutscheri_DSM20755","Cmustelae_DSM45274","Cpseudotuberculosis_31","Cpseudotuberculosis_ATCC19410","Crouxii_FRC0190","Csilvaticum_KL0182","Ctestudinoris_DSM44614","Culcerans_NCTC120…	0.238681	0.237267	2.05428	0.238681	0.237267	2.05428	2050	1	1. 0.65818;2. 152;3. 454;4. 158;5. 158;6. 472;7. 158;8. 472;9. 418;10. V;11. GTC
ERS451417_01039	1717.62.peg.1049	NA	NA	NA	1	8	Cbelfantii_FRC0043,"Cdiphtheriae_NCTC11397","Cpseudotuberculosis_31","Cpseudotuberculosis_ATCC19410","Crouxii_FRC0190","Csilvaticum_KL0182","Culcerans_NCTC12077","Culcerans_NCTC7910"	0.168656	0.113037	3.42409	0.168656	0.113037	3.42409	2	2	1. 0.61918;2. 32;3. 94;4. 35;5. 35;6. 103;7. 35;8. 103;9. 94;10. A;11. GCA	1. 0.57062;2. 187;3. 559;4. 190;5. 190;6. 568;7. 190;8. 568;9. 559;10. D;11. GAT
ERS451417_01001	1717.62.peg.1012	NA	NA	NA	1	19	Cbelfantii_FRC0043,"Ccamporealensis_DSM44610","Cdiphtheriae_NCTC11397","Cefficiens_YS314","Cepidermidicanis_DSM45586","Chalotolerans_YIM70093","Chumireducens_DSM45392","Ckutscheri_DSM20755","Cmarinum_DSM44953","Cmustelae_DSM45274","Cpseudotuberculosis_31","Cpseudotuberculosis_ATCC19410","Crouxii_FRC0190","Csilvaticum_KL0182","Csimulans_PES1","Csingulare_IBSB52218","Ctestudinoris_DSM44614","Culcer…	0.124047	0.124047	2.19459	0.124047	0.124047	2.19459	7170	2	1. 0.62915;2. 66;3. 196;4. 94;5. 94;6. 280;7. 97;8. 289;9. 196;10. I;11. ATC	1. 0.52564;2. 136;3. 406;4. 207;5. 189;6. 565;7. 254;8. 760;9. 271;10. V;11. GTT
ERS451417_02122	1717.62.peg.2137	NA	NA	NA	1	38	Cargentoratense_DSM44202,"Catypicum_R2070","Caurimucosum_ATCC700975","Cbelfantii_FRC0043","Ccallunae_DSM20147","Ccamporealensis_DSM44610","Cdeserti_GIMN1010","Cdiphtheriae_NCTC11397","Cdoosanense_DSM45436","Cefficiens_YS314","Cepidermidicanis_DSM45586","Cfalsenii_DSM44353","Cglutamicum_ATCC13032","Cglycinophilum_AJ3170","Chalotolerans_YIM70093","Chumireducens_DSM45392","Cimitans_DSM44264","Cjeike…	0.160327	0.160327	1.8265	0.160327	0.160327	1.8265	1282	0
ERS451417_01184	1717.62.peg.1193	NA	NA	NA	1	39	Cargentoratense_DSM44202,"Catypicum_R2070","Caurimucosum_ATCC700975","Cbelfantii_FRC0043","Ccallunae_DSM20147","Ccamporealensis_DSM44610","Cdeserti_GIMN1010","Cdiphtheriae_NCTC11397","Cdoosanense_DSM45436","Cefficiens_YS314","Cepidermidicanis_DSM45586","Cfalsenii_DSM44353","Cglutamicum_ATCC13032","Cglycinophilum_AJ3170","Chalotolerans_YIM70093","Chumireducens_DSM45392","Cimitans_DSM44264","Cjeike…	0.0981577	0.0981577	1.50781	0.0981577	0.0981577	1.50781	258	0
ERS451417_00459	1717.62.peg.463	NA	NA	NA	1	39	Cargentoratense_DSM44202,"Catypicum_R2070","Caurimucosum_ATCC700975","Cbelfantii_FRC0043","Ccallunae_DSM20147","Ccamporealensis_DSM44610","Cdeserti_GIMN1010","Cdiphtheriae_NCTC11397","Cdoosanense_DSM45436","Cefficiens_YS314","Cepidermidicanis_DSM45586","Cfalsenii_DSM44353","Cglutamicum_ATCC13032","Cglycinophilum_AJ3170","Chalotolerans_YIM70093","Chumireducens_DSM45392","Cimitans_DSM44264","Cjeike…	0.186482	0.186482	1.8279	0.186482	0.186482	1.8279	258	0
ERS451417_00843	1717.62.peg.848	NA	NA	NA	1	39	Cargentoratense_DSM44202,"Catypicum_R2070","Caurimucosum_ATCC700975","Cbelfantii_FRC0043","Ccallunae_DSM20147","Ccamporealensis_DSM44610","Cdeserti_GIMN1010","Cdiphtheriae_NCTC11397","Cdoosanense_DSM45436","Cefficiens_YS314","Cepidermidicanis_DSM45586","Cfalsenii_DSM44353","Cglutamicum_ATCC13032","Cglycinophilum_AJ3170","Chalotolerans_YIM70093","Chumireducens_DSM45392","Cimitans_DSM44264","Cjeike…	0.145812	0.145812	1.81829	0.145812	0.145812	1.81832	258	0
ERS451417_01881	1717.62.peg.1882	NA	NA	NA	1	16	Cargentoratense_DSM44202,"Cbelfantii_FRC0043","Cdiphtheriae_NCTC11397","Cepidermidicanis_DSM45586","Chalotolerans_YIM70093","Chumireducens_DSM45392","Cmarinum_DSM44953","Cmustelae_DSM45274","Cpseudotuberculosis_31","Cpseudotuberculosis_ATCC19410","Csilvaticum_KL0182","Csingulare_IBSB52218","Ctestudinoris_DSM44614","Culcerans_NCTC12077","Culcerans_NCTC7910","Cvitaeruminis_DSM20294"	0.232585	0.232585	1.57109	0.232585	0.232585	1.57109	2	1	1. 0.40426;2. 58;3. 172;4. 66;5. 63;6. 187;7. 63;8. 187;9. 112;10. V;11. GTC
ERS451417_01975	1717.62.peg.1975	NA	NA	NA	1	35	Cargentoratense_DSM44202,"Catypicum_R2070","Caurimucosum_ATCC700975","Cbelfantii_FRC0043","Ccallunae_DSM20147","Ccamporealensis_DSM44610","Cdeserti_GIMN1010","Cdiphtheriae_NCTC11397","Cdoosanense_DSM45436","Cefficiens_YS314","Cepidermidicanis_DSM45586","Cfalsenii_DSM44353","Cglutamicum_ATCC13032","Cglycinophilum_AJ3170","Chalotolerans_YIM70093","Chumireducens_DSM45392","Cimitans_DSM44264","Cjeike…	0.108713	0.108713	1.72148	0.108713	0.108713	1.72148	3330	0
ERS451417_01040	1717.62.peg.1050	NA	NA	NA	1	20	Cbelfantii_FRC0043,"Ccallunae_DSM20147","Cdeserti_GIMN1010","Cdiphtheriae_NCTC11397","Cefficiens_YS314","Cglutamicum_ATCC13032","Chalotolerans_YIM70093","Chumireducens_DSM45392","Cjeikeium_K41","Cmarinum_DSM44953","Cmustelae_DSM45274","Cpseudotuberculosis_31","Cpseudotuberculosis_ATCC19410","CriegeliiPUDD83A45","Crouxii_FRC0190","Csilvaticum_KL0182","Culcerans_NCTC12077","Culcerans_NCTC7910","Cur…	0.303307	0.303307	1.7069	0.303307	0.303307	1.7069	258	0
ERS451417_00999	1717.62.peg.1010	NA	NA	NA	1	39	Cargentoratense_DSM44202,"Catypicum_R2070","Caurimucosum_ATCC700975","Cbelfantii_FRC0043","Ccallunae_DSM20147","Ccamporealensis_DSM44610","Cdeserti_GIMN1010","Cdiphtheriae_NCTC11397","Cdoosanense_DSM45436","Cefficiens_YS314","Cepidermidicanis_DSM45586","Cfalsenii_DSM44353","Cglutamicum_ATCC13032","Cglycinophilum_AJ3170","Chalotolerans_YIM70093","Chumireducens_DSM45392","Cimitans_DSM44264","Cjeike…	0.0819718	0.0819718	1.65585	0.0819722	0.0819722	1.65585	2	2	1. 0.48897;2. 186;3. 556;4. 212;5. 212;6. 634;7. 232;8. 694;9. 529;10. E;11. GAG	1. 0.49199;2. 423;3. 1267;4. 449;5. 449;6. 1345;7. 469;8. 1405;9. 1237;10. A;11. GCC
ERS451417_00789	1717.62.peg.796	NA	NA	NA	1	20	Catypicum_R2070,"Cbelfantii_FRC0043","Ccallunae_DSM20147","Cdeserti_GIMN1010","Cdiphtheriae_NCTC11397","Cdoosanense_DSM45436","Cefficiens_YS314","Cglutamicum_ATCC13032","Chalotolerans_YIM70093","Chumireducens_DSM45392","Ckutscheri_DSM20755","Cmarinum_DSM44953","Cmaris_DSM45190","Cmustelae_DSM45274","Crouxii_FRC0190","Csilvaticum_KL0182","Ctestudinoris_DSM44614","Culcerans_NCTC12077","Culcerans_NC…	0.728408	0.326365	1.50193	0.444164	0.326365	1.50193	2306	0
ERS451417_00881	1717.62.peg.887	NA	NA	NA	1	17	Caurimucosum_ATCC700975,"Cbelfantii_FRC0043","Ccamporealensis_DSM44610","Cdiphtheriae_NCTC11397","Cepidermidicanis_DSM45586","Cjeikeium_K41","Ckutscheri_DSM20755","Clactis_RW25","Cpseudotuberculosis_31","Cpseudotuberculosis_ATCC19410","Crouxii_FRC0190","Csilvaticum_KL0182","Csimulans_PES1","Csingulare_IBSB52218","Culcerans_NCTC12077","Culcerans_NCTC7910","Cuterequi_DSM45634"	0.146211	0.146211	2.66258	0.146211	0.146211	2.66258	258	0
ERS451417_00860	1717.62.peg.865	NA	NA	NA	1	27	Cargentoratense_DSM44202,"Catypicum_R2070","Caurimucosum_ATCC700975","Cbelfantii_FRC0043","Ccallunae_DSM20147","Ccamporealensis_DSM44610","Cdeserti_GIMN1010","Cdiphtheriae_NCTC11397","Cdoosanense_DSM45436","Cefficiens_YS314","Cfalsenii_DSM44353","Cglutamicum_ATCC13032","Chumireducens_DSM45392","Cimitans_DSM44264","Ckroppenstedtii_DSM44385","Ckutscheri_DSM20755","Cmarinum_DSM44953","Cmustelae_DSM4…	0.153922	0.153922	1.49226	0.153922	0.153922	1.49225	258	0
ERS451417_00512	1717.62.peg.516	NA	NA	NA	1	8	Cbelfantii_FRC0043,"Cdiphtheriae_NCTC11397","Cpseudotuberculosis_31","Cpseudotuberculosis_ATCC19410","Crouxii_FRC0190","Csilvaticum_KL0182","Culcerans_NCTC12077","Culcerans_NCTC7910"	0.0801617	0.0801617	3.74579	0.0801617	0.0801617	3.74579	2050	1	1. 0.48014;2. 268;3. 802;4. 399;5. 268;6. 802;7. 286;8. 856;9. 667;10. T;11. ACT
ERS451417_01954	1717.62.peg.1954	NA	NA	NA	1	26	Cargentoratense_DSM44202,"Catypicum_R2070","Caurimucosum_ATCC700975","Cbelfantii_FRC0043","Ccallunae_DSM20147","Cdiphtheriae_NCTC11397","Cepidermidicanis_DSM45586","Cfalsenii_DSM44353","Cglycinophilum_AJ3170","Cimitans_DSM44264","Cjeikeium_K41","Ckroppenstedtii_DSM44385","Clactis_RW25","Cmarinum_DSM44953","Cpseudotuberculosis_31","Cpseudotuberculosis_ATCC19410","CriegeliiPUDD83A45","Csilvaticum_K…	0.282402	0.282402	1.65257	0.282402	0.282402	1.65258	3330	0
ERS451417_02120	1717.62.peg.2135	NA	NA	NA	1	36	Cargentoratense_DSM44202,"Catypicum_R2070","Caurimucosum_ATCC700975","Cbelfantii_FRC0043","Ccallunae_DSM20147","Ccamporealensis_DSM44610","Cdeserti_GIMN1010","Cdiphtheriae_NCTC11397","Cdoosanense_DSM45436","Cefficiens_YS314","Cepidermidicanis_DSM45586","Cfalsenii_DSM44353","Cglutamicum_ATCC13032","Cglycinophilum_AJ3170","Chalotolerans_YIM70093","Chumireducens_DSM45392","Cimitans_DSM44264","Cjeike…	0.127168	0.127168	1.78105	0.127168	0.127168	1.78105	258	0
ERS451417_01611	1717.62.peg.1620	NA	NA	NA	1	38	Cargentoratense_DSM44202,"Catypicum_R2070","Caurimucosum_ATCC700975","Cbelfantii_FRC0043","Ccallunae_DSM20147","Ccamporealensis_DSM44610","Cdeserti_GIMN1010","Cdiphtheriae_NCTC11397","Cdoosanense_DSM45436","Cefficiens_YS314","Cepidermidicanis_DSM45586","Cfalsenii_DSM44353","Cglutamicum_ATCC13032","Cglycinophilum_AJ3170","Chalotolerans_YIM70093","Chumireducens_DSM45392","Cimitans_DSM44264","Cjeike…	0.165545	0.165545	1.71266	0.165545	0.165545	1.71265	258	0
ERS451417_01783	1717.62.peg.1788	NA	NA	NA	1	19	Cbelfantii_FRC0043,"Ccallunae_DSM20147","Ccamporealensis_DSM44610","Cdiphtheriae_NCTC11397","Cdoosanense_DSM45436","Cglutamicum_ATCC13032","Ckutscheri_DSM20755","Cmarinum_DSM44953","Cmaris_DSM45190","Cpseudotuberculosis_31","Cpseudotuberculosis_ATCC19410","Csilvaticum_KL0182","Csimulans_PES1","Csingulare_IBSB52218","Ctestudinoris_DSM44614","Culcerans_NCTC12077","Culcerans_NCTC7910","Cuterequi_DSM…	0.197819	0.197819	1.67477	0.197819	0.197819	1.67477	258	0
ERS451417_00891	1717.62.peg.897	NA	NA	NA	1	38	Cargentoratense_DSM44202,"Catypicum_R2070","Caurimucosum_ATCC700975","Cbelfantii_FRC0043","Ccallunae_DSM20147","Ccamporealensis_DSM44610","Cdeserti_GIMN1010","Cdiphtheriae_NCTC11397","Cdoosanense_DSM45436","Cefficiens_YS314","Cepidermidicanis_DSM45586","Cfalsenii_DSM44353","Cglutamicum_ATCC13032","Cglycinophilum_AJ3170","Chalotolerans_YIM70093","Chumireducens_DSM45392","Cimitans_DSM44264","Cjeike…	0.217167	0.217167	1.97147	0.217167	0.217167	1.97147	2306	0
ERS451417_01566	1717.62.peg.1575	NA	NA	NA	1	39	Cargentoratense_DSM44202,"Catypicum_R2070","Caurimucosum_ATCC700975","Cbelfantii_FRC0043","Ccallunae_DSM20147","Ccamporealensis_DSM44610","Cdeserti_GIMN1010","Cdiphtheriae_NCTC11397","Cdoosanense_DSM45436","Cefficiens_YS314","Cepidermidicanis_DSM45586","Cfalsenii_DSM44353","Cglutamicum_ATCC13032","Cglycinophilum_AJ3170","Chalotolerans_YIM70093","Chumireducens_DSM45392","Cimitans_DSM44264","Cjeike…	0.140457	0.140457	2.54743	0.140457	0.140457	2.54743	258	0
ERS451417_01883	1717.62.peg.1884	NA	NA	NA	1	35	Cargentoratense_DSM44202,"Catypicum_R2070","Caurimucosum_ATCC700975","Cbelfantii_FRC0043","Ccallunae_DSM20147","Ccamporealensis_DSM44610","Cdeserti_GIMN1010","Cdiphtheriae_NCTC11397","Cdoosanense_DSM45436","Cefficiens_YS314","Cepidermidicanis_DSM45586","Cfalsenii_DSM44353","Cglutamicum_ATCC13032","Chalotolerans_YIM70093","Chumireducens_DSM45392","Cimitans_DSM44264","Cjeikeium_K41","Ckroppenstedti…	0.173386	0.151234	1.87798	0.173386	0.151234	1.87798	2	3	1. 0.5935;2. 380;3. 1138;4. 421;5. 421;6. 1261;7. 441;8. 1321;9. 979;10. P;11. CCT	1. 0.60122;2. 460;3. 1378;4. 501;5. 501;6. 1501;7. 521;8. 1561;9. 1219;10. A;11. GCA	1. 0.548;2. 489;3. 1465;4. 530;5. 530;6. 1588;7. 550;8. 1648;9. 1306;10. G;11. GGC
ERS451417_01586	1717.62.peg.1595	NA	NA	NA	1	37	Cargentoratense_DSM44202,"Catypicum_R2070","Caurimucosum_ATCC700975","Cbelfantii_FRC0043","Ccallunae_DSM20147","Ccamporealensis_DSM44610","Cdeserti_GIMN1010","Cdiphtheriae_NCTC11397","Cdoosanense_DSM45436","Cefficiens_YS314","Cepidermidicanis_DSM45586","Cfalsenii_DSM44353","Cglutamicum_ATCC13032","Cglycinophilum_AJ3170","Chalotolerans_YIM70093","Chumireducens_DSM45392","Cimitans_DSM44264","Cjeike…	0.193958	0.193958	1.68253	0.193958	0.193958	1.68251	2	1	1. 0.56093;2. 143;3. 427;4. 161;5. 161;6. 481;7. 211;8. 631;9. 409;10. E;11. GAG
ERS451417_00296	1717.62.peg.297	NA	NA	NA	1	14	Cbelfantii_FRC0043,"Cdiphtheriae_NCTC11397","Cepidermidicanis_DSM45586","Chalotolerans_YIM70093","Chumireducens_DSM45392","Ckutscheri_DSM20755","Cmustelae_DSM45274","Cpseudotuberculosis_31","Cpseudotuberculosis_ATCC19410","Crouxii_FRC0190","Csilvaticum_KL0182","Culcerans_NCTC12077","Culcerans_NCTC7910","Cvitaeruminis_DSM20294"	0.30002	0.30002	2.10167	0.30002	0.30002	2.10166	3330	0
ERS451417_00189	1717.62.peg.185	NA	NA	NA	1	22	Catypicum_R2070,"Caurimucosum_ATCC700975","Cbelfantii_FRC0043","Ccamporealensis_DSM44610","Cdiphtheriae_NCTC11397","Cepidermidicanis_DSM45586","Cfalsenii_DSM44353","Ckroppenstedtii_DSM44385","Ckutscheri_DSM20755","Clactis_RW25","Cmustelae_DSM45274","Cpseudotuberculosis_31","Cpseudotuberculosis_ATCC19410","CriegeliiPUDD83A45","Crouxii_FRC0190","Csilvaticum_KL0182","Csimulans_PES1","Ctestudinoris_D…	0.390592	0.390592	2.2253	0.390592	0.390592	2.2253	2306	0
ERS451417_01351	1717.62.peg.1359	NA	NA	NA	1	38	Cargentoratense_DSM44202,"Catypicum_R2070","Caurimucosum_ATCC700975","Cbelfantii_FRC0043","Ccallunae_DSM20147","Ccamporealensis_DSM44610","Cdeserti_GIMN1010","Cdiphtheriae_NCTC11397","Cdoosanense_DSM45436","Cefficiens_YS314","Cepidermidicanis_DSM45586","Cfalsenii_DSM44353","Cglutamicum_ATCC13032","Cglycinophilum_AJ3170","Chalotolerans_YIM70093","Chumireducens_DSM45392","Cimitans_DSM44264","Cjeike…	0.139832	0.139832	1.555	0.139832	0.139832	1.555	1282	0
ERS451417_00343	1717.62.peg.346	NA	NA	NA	1	39	Cargentoratense_DSM44202,"Catypicum_R2070","Caurimucosum_ATCC700975","Cbelfantii_FRC0043","Ccallunae_DSM20147","Ccamporealensis_DSM44610","Cdeserti_GIMN1010","Cdiphtheriae_NCTC11397","Cdoosanense_DSM45436","Cefficiens_YS314","Cepidermidicanis_DSM45586","Cfalsenii_DSM44353","Cglutamicum_ATCC13032","Cglycinophilum_AJ3170","Chalotolerans_YIM70093","Chumireducens_DSM45392","Cimitans_DSM44264","Cjeike…	0.0714428	0.0714428	2.23023	0.0714526	0.0714526	2.23023	1026	1	1. 0.41716;2. 223;3. 667;4. 296;5. 296;6. 886;7. 437;8. 1309;9. 568;10. E;11. GAA
ERS451417_00304	1717.62.peg.305	NA	NA	NA	1	22	Catypicum_R2070,"Caurimucosum_ATCC700975","Cbelfantii_FRC0043","Ccamporealensis_DSM44610","Cdiphtheriae_NCTC11397","Cepidermidicanis_DSM45586","Chumireducens_DSM45392","Cimitans_DSM44264","Cmarinum_DSM44953","Cmustelae_DSM45274","Cpseudotuberculosis_31","Cpseudotuberculosis_ATCC19410","CriegeliiPUDD83A45","Crouxii_FRC0190","Csilvaticum_KL0182","Csimulans_PES1","Csingulare_IBSB52218","Ctestudinori…	0.115778	0.115778	1.98664	0.115778	0.115778	1.98664	2	1	1. 0.64419;2. 118;3. 352;4. 120;5. 120;6. 358;7. 128;8. 382;9. 103;10. A;11. GCT
ERS451417_00403	1717.62.peg.403	NA	NA	NA	1	38	Cargentoratense_DSM44202,"Catypicum_R2070","Caurimucosum_ATCC700975","Cbelfantii_FRC0043","Ccallunae_DSM20147","Ccamporealensis_DSM44610","Cdeserti_GIMN1010","Cdiphtheriae_NCTC11397","Cdoosanense_DSM45436","Cefficiens_YS314","Cepidermidicanis_DSM45586","Cfalsenii_DSM44353","Cglutamicum_ATCC13032","Cglycinophilum_AJ3170","Chalotolerans_YIM70093","Chumireducens_DSM45392","Cimitans_DSM44264","Cjeike…	0.323311	0.0943873	1.92006	0.220954	0.0943873	1.92006	258	0
ERS451417_00868	1717.62.peg.873	NA	NA	NA	1	8	Cbelfantii_FRC0043,"Cdiphtheriae_NCTC11397","Cpseudotuberculosis_31","Cpseudotuberculosis_ATCC19410","Crouxii_FRC0190","Csilvaticum_KL0182","Culcerans_NCTC12077","Culcerans_NCTC7910"	0.121436	0.121436	2.99994	0.121436	0.121436	2.99993	258	0
ERS451417_00961	1717.62.peg.968	NA	NA	NA	1	39	Cargentoratense_DSM44202,"Catypicum_R2070","Caurimucosum_ATCC700975","Cbelfantii_FRC0043","Ccallunae_DSM20147","Ccamporealensis_DSM44610","Cdeserti_GIMN1010","Cdiphtheriae_NCTC11397","Cdoosanense_DSM45436","Cefficiens_YS314","Cepidermidicanis_DSM45586","Cfalsenii_DSM44353","Cglutamicum_ATCC13032","Cglycinophilum_AJ3170","Chalotolerans_YIM70093","Chumireducens_DSM45392","Cimitans_DSM44264","Cjeike…	0.153876	0.153876	1.47423	0.153876	0.153876	1.47423	258	0
ERS451417_01944	1717.62.peg.1942	NA	NA	NA	1	16	Catypicum_R2070,"Caurimucosum_ATCC700975","Cbelfantii_FRC0043","Cdiphtheriae_NCTC11397","Cjeikeium_K41","Ckroppenstedtii_DSM44385","Clactis_RW25","Cpseudotuberculosis_31","Cpseudotuberculosis_ATCC19410","CriegeliiPUDD83A45","Csilvaticum_KL0182","Csimulans_PES1","Culcerans_NCTC12077","Culcerans_NCTC7910","Curealyticum_DSM7109","Cuterequi_DSM45634"	0.110201	0.110201	2.16023	0.110201	0.110201	2.16025	2306	0
ERS451417_01718	1717.62.peg.1721	NA	NA	NA	1	38	Cargentoratense_DSM44202,"Catypicum_R2070","Caurimucosum_ATCC700975","Cbelfantii_FRC0043","Ccallunae_DSM20147","Ccamporealensis_DSM44610","Cdeserti_GIMN1010","Cdiphtheriae_NCTC11397","Cdoosanense_DSM45436","Cefficiens_YS314","Cepidermidicanis_DSM45586","Cfalsenii_DSM44353","Cglutamicum_ATCC13032","Cglycinophilum_AJ3170","Chalotolerans_YIM70093","Chumireducens_DSM45392","Cimitans_DSM44264","Cjeike…	0.210831	0.210831	1.53517	0.210831	0.210831	1.53517	2	1	1. 0.52214;2. 278;3. 832;4. 323;5. 323;6. 967;7. 357;8. 1069;9. 682;10. D;11. GAC
ERS451417_00048	1717.62.peg.44	NA	NA	NA	1	35	Cargentoratense_DSM44202,"Catypicum_R2070","Caurimucosum_ATCC700975","Cbelfantii_FRC0043","Ccamporealensis_DSM44610","Cdeserti_GIMN1010","Cdiphtheriae_NCTC11397","Cdoosanense_DSM45436","Cefficiens_YS314","Cfalsenii_DSM44353","Cglycinophilum_AJ3170","Chalotolerans_YIM70093","Chumireducens_DSM45392","Cimitans_DSM44264","Cjeikeium_K41","Ckroppenstedtii_DSM44385","Clactis_RW25","Cmarinum_DSM44953","C…	0.114495	0.114495	1.9175	0.114495	0.114495	1.9175	3330	0
ERS451417_00578	1717.62.peg.581	NA	NA	NA	1	34	Cargentoratense_DSM44202,"Catypicum_R2070","Caurimucosum_ATCC700975","Cbelfantii_FRC0043","Ccallunae_DSM20147","Ccamporealensis_DSM44610","Cdeserti_GIMN1010","Cdiphtheriae_NCTC11397","Cdoosanense_DSM45436","Cefficiens_YS314","Cepidermidicanis_DSM45586","Cglutamicum_ATCC13032","Chalotolerans_YIM70093","Chumireducens_DSM45392","Cimitans_DSM44264","Ckroppenstedtii_DSM44385","Ckutscheri_DSM20755","Cl…	0.161908	0.161908	1.98683	0.161908	0.161908	1.98684	258	0
ERS451417_00975	1717.62.peg.985	NA	NA	NA	1	36	Cargentoratense_DSM44202,"Catypicum_R2070","Caurimucosum_ATCC700975","Cbelfantii_FRC0043","Ccallunae_DSM20147","Ccamporealensis_DSM44610","Cdeserti_GIMN1010","Cdiphtheriae_NCTC11397","Cdoosanense_DSM45436","Cefficiens_YS314","Cepidermidicanis_DSM45586","Cfalsenii_DSM44353","Cglutamicum_ATCC13032","Chalotolerans_YIM70093","Chumireducens_DSM45392","Cimitans_DSM44264","Cjeikeium_K41","Ckroppenstedti…	0.20581	0.20581	1.70547	0.20581	0.20581	1.70547	2050	3	1. 0.56272;2. 383;3. 1147;4. 403;5. 403;6. 1207;7. 473;8. 1417;9. 811;10. V;11. GTG	1. 0.50403;2. 496;3. 1486;4. 516;5. 516;6. 1546;7. 586;8. 1756;9. 1150;10. A;11. GCA	1. 0.59485;2. 524;3. 1570;4. 544;5. 544;6. 1630;7. 614;8. 1840;9. 1234;10. A;11. GCA
ERS451417_02173	1717.62.peg.2199	NA	NA	NA	1	38	Cargentoratense_DSM44202,"Catypicum_R2070","Caurimucosum_ATCC700975","Cbelfantii_FRC0043","Ccallunae_DSM20147","Ccamporealensis_DSM44610","Cdeserti_GIMN1010","Cdiphtheriae_NCTC11397","Cdoosanense_DSM45436","Cefficiens_YS314","Cepidermidicanis_DSM45586","Cfalsenii_DSM44353","Cglutamicum_ATCC13032","Cglycinophilum_AJ3170","Chalotolerans_YIM70093","Chumireducens_DSM45392","Cimitans_DSM44264","Cjeike…	0.0672701	0.0672701	1.84568	0.0672701	0.0672701	1.84568	1282	0
ERS451417_01973	1717.62.peg.1973	NA	NA	NA	1	38	Cargentoratense_DSM44202,"Catypicum_R2070","Caurimucosum_ATCC700975","Cbelfantii_FRC0043","Ccallunae_DSM20147","Ccamporealensis_DSM44610","Cdeserti_GIMN1010","Cdiphtheriae_NCTC11397","Cdoosanense_DSM45436","Cefficiens_YS314","Cepidermidicanis_DSM45586","Cfalsenii_DSM44353","Cglutamicum_ATCC13032","Cglycinophilum_AJ3170","Chalotolerans_YIM70093","Chumireducens_DSM45392","Cimitans_DSM44264","Cjeike…	0.102316	0.102316	1.92323	0.102316	0.102316	1.92323	258	0
ERS451417_00143	1717.62.peg.142	NA	NA	NA	1	39	Cargentoratense_DSM44202,"Catypicum_R2070","Caurimucosum_ATCC700975","Cbelfantii_FRC0043","Ccallunae_DSM20147","Ccamporealensis_DSM44610","Cdeserti_GIMN1010","Cdiphtheriae_NCTC11397","Cdoosanense_DSM45436","Cefficiens_YS314","Cepidermidicanis_DSM45586","Cfalsenii_DSM44353","Cglutamicum_ATCC13032","Cglycinophilum_AJ3170","Chalotolerans_YIM70093","Chumireducens_DSM45392","Cimitans_DSM44264","Cjeike…	0.201161	0.131056	1.69147	0.201161	0.131056	1.69147	1026	2	1. 0.76322;2. 239;3. 715;4. 303;5. 303;6. 907;7. 377;8. 1129;9. 547;10. I;11. ATT	1. 0.76322;2. 289;3. 865;4. 353;5. 353;6. 1057;7. 427;8. 1279;9. 697;10. T;11. ACG
ERS451417_02327	1717.62.peg.2354	NA	NA	NA	1	16	Catypicum_R2070,"Cbelfantii_FRC0043","Cdeserti_GIMN1010","Cdiphtheriae_NCTC11397","Cdoosanense_DSM45436","Cefficiens_YS314","Cglutamicum_ATCC13032","Cglycinophilum_AJ3170","Chalotolerans_YIM70093","Ckutscheri_DSM20755","Cmaris_DSM45190","Cpseudotuberculosis_31","Cpseudotuberculosis_ATCC19410","Cterpenotabidum_Y11","Culcerans_NCTC12077","Culcerans_NCTC7910"	0.167006	0.167006	1.51594	0.167006	0.167006	1.51594	2	1	1. 0.648;2. 68;3. 202;4. 81;5. 77;6. 229;7. 80;8. 238;9. 193;10. V;11. GTA
ERS451417_00139	1717.62.peg.138	NA	NA	NA	1	9	Cbelfantii_FRC0043,"Cdiphtheriae_NCTC11397","Cpseudotuberculosis_31","Cpseudotuberculosis_ATCC19410","Crouxii_FRC0190","Csilvaticum_KL0182","Culcerans_NCTC12077","Culcerans_NCTC7910","Cvitaeruminis_DSM20294"	0.0930758	0.0891476	2.61216	0.0930758	0.0891476	2.61216	2050	1	1. 0.56525;2. 226;3. 676;4. 255;5. 241;6. 721;7. 262;8. 784;9. 361;10. D;11. GAT
ERS451417_01782	1717.62.peg.1787	NA	NA	NA	1	38	Cargentoratense_DSM44202,"Catypicum_R2070","Caurimucosum_ATCC700975","Cbelfantii_FRC0043","Ccallunae_DSM20147","Ccamporealensis_DSM44610","Cdeserti_GIMN1010","Cdiphtheriae_NCTC11397","Cdoosanense_DSM45436","Cefficiens_YS314","Cepidermidicanis_DSM45586","Cfalsenii_DSM44353","Cglutamicum_ATCC13032","Cglycinophilum_AJ3170","Chalotolerans_YIM70093","Chumireducens_DSM45392","Cimitans_DSM44264","Cjeike…	0.349175	0.231767	1.39518	0.349185	0.231767	1.39517	2	1	1. 0.80238;2. 63;3. 187;4. 63;5. 63;6. 187;7. 63;8. 187;9. 184;10. T;11. ACC
ERS451417_01866	1717.62.peg.1868	NA	NA	NA	1	31	Cargentoratense_DSM44202,"Caurimucosum_ATCC700975","Cbelfantii_FRC0043","Ccallunae_DSM20147","Ccamporealensis_DSM44610","Cdeserti_GIMN1010","Cdiphtheriae_NCTC11397","Cdoosanense_DSM45436","Cefficiens_YS314","Cepidermidicanis_DSM45586","Cfalsenii_DSM44353","Cglutamicum_ATCC13032","Cglycinophilum_AJ3170","Chalotolerans_YIM70093","Chumireducens_DSM45392","Cjeikeium_K41","Ckroppenstedtii_DSM44385","C…	0.192092	0.177285	1.47217	0.192092	0.177285	1.47217	2	1	1. 0.59637;2. 151;3. 451;4. 168;5. 164;6. 490;7. 174;8. 520;9. 418;10. L;11. CTG
ERS451417_00087	1717.62.peg.84	NA	NA	NA	1	24	Caurimucosum_ATCC700975,"Cbelfantii_FRC0043","Ccallunae_DSM20147","Cdiphtheriae_NCTC11397","Cefficiens_YS314","Cepidermidicanis_DSM45586","Cfalsenii_DSM44353","Cglutamicum_ATCC13032","Clactis_RW25","Cmarinum_DSM44953","Cmustelae_DSM45274","Cpseudotuberculosis_31","Cpseudotuberculosis_ATCC19410","Crouxii_FRC0190","Csilvaticum_KL0182","Csimulans_PES1","Csingulare_IBSB52218","Cterpenotabidum_Y11","C…	0.309389	0.262577	2.10007	0.309389	0.262577	2.10007	2050	2	1. 0.67481;2. 69;3. 205;4. 92;5. 82;6. 244;7. 125;8. 373;9. 109;10. S;11. TCC	1. 0.67523;2. 236;3. 706;4. 260;5. 250;6. 748;7. 293;8. 877;9. 553;10. L;11. CTC
ERS451417_01258	1717.62.peg.1266	NA	NA	NA	1	18	Cargentoratense_DSM44202,"Cbelfantii_FRC0043","Ccallunae_DSM20147","Cdeserti_GIMN1010","Cdiphtheriae_NCTC11397","Cdoosanense_DSM45436","Cepidermidicanis_DSM45586","Cglutamicum_ATCC13032","Chalotolerans_YIM70093","Chumireducens_DSM45392","Ckutscheri_DSM20755","Cmarinum_DSM44953","Cpseudotuberculosis_ATCC19410","Crouxii_FRC0190","Ctestudinoris_DSM44614","Culcerans_NCTC12077","Culcerans_NCTC7910","C…	0.312479	0.312479	1.37126	0.312479	0.312479	1.37126	2306	0
ERS451417_01635	1717.62.peg.1642	NA	NA	NA	1	22	Cargentoratense_DSM44202,"Cbelfantii_FRC0043","Ccallunae_DSM20147","Cdeserti_GIMN1010","Cdiphtheriae_NCTC11397","Cefficiens_YS314","Cepidermidicanis_DSM45586","Cfalsenii_DSM44353","Cglutamicum_ATCC13032","Cglycinophilum_AJ3170","Cjeikeium_K41","Ckroppenstedtii_DSM44385","Clactis_RW25","Cmustelae_DSM45274","Cpseudotuberculosis_31","Cpseudotuberculosis_ATCC19410","Csilvaticum_KL0182","Cterpenotabid…	0.179396	0.151472	1.92082	0.179396	0.151472	1.92083	3074	3	1. 0.53286;2. 38;3. 112;4. 71;5. 62;6. 184;7. 155;8. 463;9. 16;10. E;11. GAG	1. 0.50566;2. 276;3. 826;4. 320;5. 303;6. 907;7. 400;8. 1198;9. 622;10. E;11. GAA	1. 0.50266;2. 281;3. 841;4. 325;5. 308;6. 922;7. 405;8. 1213;9. 637;10. M;11. ATG
ERS451417_00788	1717.62.peg.795	NA	NA	NA	1	20	Cbelfantii_FRC0043,"Ccallunae_DSM20147","Cdeserti_GIMN1010","Cdiphtheriae_NCTC11397","Cefficiens_YS314","Cepidermidicanis_DSM45586","Cfalsenii_DSM44353","Cglutamicum_ATCC13032","Cglycinophilum_AJ3170","Cjeikeium_K41","Ckroppenstedtii_DSM44385","Clactis_RW25","Cmustelae_DSM45274","Cpseudotuberculosis_31","Cpseudotuberculosis_ATCC19410","Crouxii_FRC0190","Csilvaticum_KL0182","Cterpenotabidum_Y11","…	0.127172	0.127172	2.44797	0.127172	0.127172	2.44797	3074	1	1. 0.49136;2. 80;3. 238;4. 90;5. 90;6. 268;7. 115;8. 343;9. 196;10. I;11. ATC
ERS451417_00575	1717.62.peg.578	NA	NA	NA	1	39	Cargentoratense_DSM44202,"Catypicum_R2070","Caurimucosum_ATCC700975","Cbelfantii_FRC0043","Ccallunae_DSM20147","Ccamporealensis_DSM44610","Cdeserti_GIMN1010","Cdiphtheriae_NCTC11397","Cdoosanense_DSM45436","Cefficiens_YS314","Cepidermidicanis_DSM45586","Cfalsenii_DSM44353","Cglutamicum_ATCC13032","Cglycinophilum_AJ3170","Chalotolerans_YIM70093","Chumireducens_DSM45392","Cimitans_DSM44264","Cjeike…	0.126743	0.126743	2.27788	0.126743	0.126743	2.27787	258	0
ERS451417_00618	1717.62.peg.622	NA	NA	NA	1	39	Cargentoratense_DSM44202,"Catypicum_R2070","Caurimucosum_ATCC700975","Cbelfantii_FRC0043","Ccallunae_DSM20147","Ccamporealensis_DSM44610","Cdeserti_GIMN1010","Cdiphtheriae_NCTC11397","Cdoosanense_DSM45436","Cefficiens_YS314","Cepidermidicanis_DSM45586","Cfalsenii_DSM44353","Cglutamicum_ATCC13032","Cglycinophilum_AJ3170","Chalotolerans_YIM70093","Chumireducens_DSM45392","Cimitans_DSM44264","Cjeike…	0.105663	0.105663	1.95571	0.105663	0.105663	1.95571	2	1	1. 0.60831;2. 282;3. 844;4. 303;5. 303;6. 907;7. 405;8. 1213;9. 814;10. I;11. ATC
ERS451417_01501	1717.62.peg.1509	NA	NA	NA	1	38	Cargentoratense_DSM44202,"Catypicum_R2070","Caurimucosum_ATCC700975","Cbelfantii_FRC0043","Ccallunae_DSM20147","Ccamporealensis_DSM44610","Cdeserti_GIMN1010","Cdiphtheriae_NCTC11397","Cdoosanense_DSM45436","Cefficiens_YS314","Cepidermidicanis_DSM45586","Cfalsenii_DSM44353","Cglutamicum_ATCC13032","Cglycinophilum_AJ3170","Chalotolerans_YIM70093","Chumireducens_DSM45392","Cimitans_DSM44264","Cjeike…	0.0768264	0.0768264	1.36872	0.0768264	0.0768264	1.36872	1282	0
ERS451417_01542	1717.62.peg.1551	NA	NA	NA	1	38	Cargentoratense_DSM44202,"Catypicum_R2070","Caurimucosum_ATCC700975","Cbelfantii_FRC0043","Ccallunae_DSM20147","Ccamporealensis_DSM44610","Cdeserti_GIMN1010","Cdiphtheriae_NCTC11397","Cdoosanense_DSM45436","Cefficiens_YS314","Cepidermidicanis_DSM45586","Cfalsenii_DSM44353","Cglutamicum_ATCC13032","Cglycinophilum_AJ3170","Chalotolerans_YIM70093","Chumireducens_DSM45392","Cimitans_DSM44264","Cjeike…	0.203322	0.203322	2.16416	0.203322	0.203322	2.16416	258	0
ERS451417_00449	1717.62.peg.452	NA	NA	NA	1	17	Cbelfantii_FRC0043,"Ccallunae_DSM20147","Ccamporealensis_DSM44610","Cdeserti_GIMN1010","Cdiphtheriae_NCTC11397","Cepidermidicanis_DSM45586","Cglutamicum_ATCC13032","Ckutscheri_DSM20755","Cmustelae_DSM45274","Cpseudotuberculosis_31","Cpseudotuberculosis_ATCC19410","Crouxii_FRC0190","Csilvaticum_KL0182","Ctestudinoris_DSM44614","Culcerans_NCTC12077","Culcerans_NCTC7910","Cuterequi_DSM45634"	0.075994	0.075994	2.07353	0.075994	0.075994	2.07353	258	0
ERS451417_01304	1717.62.peg.1312	NA	NA	NA	1	38	Cargentoratense_DSM44202,"Catypicum_R2070","Caurimucosum_ATCC700975","Cbelfantii_FRC0043","Ccallunae_DSM20147","Ccamporealensis_DSM44610","Cdeserti_GIMN1010","Cdiphtheriae_NCTC11397","Cdoosanense_DSM45436","Cefficiens_YS314","Cepidermidicanis_DSM45586","Cfalsenii_DSM44353","Cglutamicum_ATCC13032","Cglycinophilum_AJ3170","Chalotolerans_YIM70093","Chumireducens_DSM45392","Cimitans_DSM44264","Cjeike…	0.145605	0.145605	1.65532	0.145605	0.145605	1.65532	1282	0
ERS451417_01327	1717.62.peg.1335	NA	NA	NA	1	38	Cargentoratense_DSM44202,"Catypicum_R2070","Caurimucosum_ATCC700975","Cbelfantii_FRC0043","Ccallunae_DSM20147","Ccamporealensis_DSM44610","Cdeserti_GIMN1010","Cdiphtheriae_NCTC11397","Cdoosanense_DSM45436","Cefficiens_YS314","Cepidermidicanis_DSM45586","Cfalsenii_DSM44353","Cglutamicum_ATCC13032","Cglycinophilum_AJ3170","Chalotolerans_YIM70093","Chumireducens_DSM45392","Cimitans_DSM44264","Cjeike…	0.472225	0.155336	2.18708	0.276725	0.155336	2.18708	1282	0
ERS451417_02017	1717.62.peg.2022	NA	NA	NA	1	38	Cargentoratense_DSM44202,"Catypicum_R2070","Caurimucosum_ATCC700975","Cbelfantii_FRC0043","Ccallunae_DSM20147","Ccamporealensis_DSM44610","Cdeserti_GIMN1010","Cdiphtheriae_NCTC11397","Cdoosanense_DSM45436","Cefficiens_YS314","Cepidermidicanis_DSM45586","Cfalsenii_DSM44353","Cglutamicum_ATCC13032","Cglycinophilum_AJ3170","Chalotolerans_YIM70093","Chumireducens_DSM45392","Cimitans_DSM44264","Cjeike…	0.115966	0.115966	2.02031	0.115966	0.115966	2.02032	258	0
ERS451417_01867	1717.62.peg.1869	NA	NA	NA	1	38	Cargentoratense_DSM44202,"Catypicum_R2070","Caurimucosum_ATCC700975","Cbelfantii_FRC0043","Ccallunae_DSM20147","Ccamporealensis_DSM44610","Cdeserti_GIMN1010","Cdiphtheriae_NCTC11397","Cdoosanense_DSM45436","Cefficiens_YS314","Cepidermidicanis_DSM45586","Cfalsenii_DSM44353","Cglutamicum_ATCC13032","Cglycinophilum_AJ3170","Chalotolerans_YIM70093","Chumireducens_DSM45392","Cimitans_DSM44264","Cjeike…	0.145538	0.145538	1.67189	0.145548	0.145548	1.67187	2	1	1. 0.5385;2. 568;3. 1702;4. 590;5. 590;6. 1768;7. 642;8. 1924;9. 1627;10. A;11. GCG
ERS451417_01550	1717.62.peg.1559	NA	NA	NA	1	31	Cargentoratense_DSM44202,"Catypicum_R2070","Caurimucosum_ATCC700975","Cbelfantii_FRC0043","Ccallunae_DSM20147","Ccamporealensis_DSM44610","Cdeserti_GIMN1010","Cdiphtheriae_NCTC11397","Cdoosanense_DSM45436","Cefficiens_YS314","Cepidermidicanis_DSM45586","Cglutamicum_ATCC13032","Chalotolerans_YIM70093","Chumireducens_DSM45392","Cimitans_DSM44264","Cjeikeium_K41","Ckroppenstedtii_DSM44385","Ckutsche…	0.147002	0.147002	2.17801	0.147002	0.147002	2.17801	258	0
ERS451417_00854	1717.62.peg.859	NA	NA	NA	1	18	Ccallunae_DSM20147,"Cdeserti_GIMN1010","Cdiphtheriae_NCTC11397","Cefficiens_YS314","Cglutamicum_ATCC13032","Chalotolerans_YIM70093","Chumireducens_DSM45392","Clactis_RW25","Cmarinum_DSM44953","Cmaris_DSM45190","Cmustelae_DSM45274","Cpseudotuberculosis_31","Cpseudotuberculosis_ATCC19410","Crouxii_FRC0190","Ctestudinoris_DSM44614","Culcerans_NCTC12077","Culcerans_NCTC7910","Cvitaeruminis_DSM20294"	0.460972	0.251365	1.65505	0.460972	0.251365	1.65505	2050	2	1. 0.78508;2. 160;3. 478;4. 200;5. 178;6. 532;7. 176;8. 526;9. 247;10. V;11. GTC	1. 0.78845;2. 164;3. 490;4. 204;5. 182;6. 544;7. 180;8. 538;9. 259;10. A;11. GCC
ERS451417_01764	1717.62.peg.1766	NA	NA	NA	1	13	Cbelfantii_FRC0043,"Cdiphtheriae_NCTC11397","Cglycinophilum_AJ3170","Chalotolerans_YIM70093","Ckutscheri_DSM20755","Cmustelae_DSM45274","Cpseudotuberculosis_31","Cpseudotuberculosis_ATCC19410","Csilvaticum_KL0182","Cterpenotabidum_Y11","Culcerans_NCTC12077","Culcerans_NCTC7910","Cvitaeruminis_DSM20294"	0.252666	0.252666	1.77538	0.252666	0.252666	1.77538	1282	0
ERS451417_00529	1717.62.peg.532	NA	NA	NA	1	7	Cbelfantii_FRC0043,"Cdiphtheriae_NCTC11397","Cpseudotuberculosis_ATCC19410","Crouxii_FRC0190","Csilvaticum_KL0182","Culcerans_NCTC12077","Culcerans_NCTC7910"	0.289844	0.289844	3.25353	0.289844	0.289844	3.25353	2306	0
ERS451417_02238	1717.62.peg.2263	NA	NA	NA	1	38	Cargentoratense_DSM44202,"Catypicum_R2070","Caurimucosum_ATCC700975","Cbelfantii_FRC0043","Ccallunae_DSM20147","Ccamporealensis_DSM44610","Cdeserti_GIMN1010","Cdiphtheriae_NCTC11397","Cdoosanense_DSM45436","Cefficiens_YS314","Cepidermidicanis_DSM45586","Cfalsenii_DSM44353","Cglutamicum_ATCC13032","Cglycinophilum_AJ3170","Chalotolerans_YIM70093","Chumireducens_DSM45392","Cimitans_DSM44264","Cjeike…	0.105175	0.105175	1.60898	0.105175	0.105175	1.60901	258	0
ERS451417_02273	1717.62.peg.2302	NA	NA	NA	1	15	Caurimucosum_ATCC700975,"Ccamporealensis_DSM44610","Cdiphtheriae_NCTC11397","Ckutscheri_DSM20755","Cmustelae_DSM45274","Cpseudotuberculosis_31","Cpseudotuberculosis_ATCC19410","CriegeliiPUDD83A45","Csilvaticum_KL0182","Csimulans_PES1","Csingulare_IBSB52218","Culcerans_NCTC12077","Culcerans_NCTC7910","Cureicelerivorans_IMMIBRIV2301","Cvitaeruminis_DSM20294"	0.14479	0.14479	1.98714	0.14479	0.14479	1.98714	3074	1	1. 0.59658;2. 11;3. 31;4. 11;5. 11;6. 31;7. 11;8. 31;9. 28;10. I;11. ATC
ERS451417_01822	1717.62.peg.1827	NA	NA	NA	1	38	Cargentoratense_DSM44202,"Catypicum_R2070","Caurimucosum_ATCC700975","Cbelfantii_FRC0043","Ccallunae_DSM20147","Ccamporealensis_DSM44610","Cdeserti_GIMN1010","Cdiphtheriae_NCTC11397","Cdoosanense_DSM45436","Cefficiens_YS314","Cepidermidicanis_DSM45586","Cfalsenii_DSM44353","Cglutamicum_ATCC13032","Cglycinophilum_AJ3170","Chalotolerans_YIM70093","Chumireducens_DSM45392","Cimitans_DSM44264","Cjeike…	0.0910733	0.0910733	1.87589	0.0910733	0.0910733	1.87588	2	1	1. 0.45918;2. 82;3. 244;4. 96;5. 96;6. 286;7. 116;8. 346;9. 214;10. E;11. GAA
ERS451417_00288	1717.62.peg.289	NA	NA	NA	1	25	Catypicum_R2070,"Cbelfantii_FRC0043","Ccallunae_DSM20147","Cdeserti_GIMN1010","Cdiphtheriae_NCTC11397","Cefficiens_YS314","Cepidermidicanis_DSM45586","Cglutamicum_ATCC13032","Chalotolerans_YIM70093","Chumireducens_DSM45392","Cimitans_DSM44264","Ckutscheri_DSM20755","Clactis_RW25","Cmarinum_DSM44953","Cmaris_DSM45190","Cmustelae_DSM45274","Cpseudotuberculosis_31","Cpseudotuberculosis_ATCC19410","C…	0.23493	0.23493	1.59449	0.23493	0.23493	1.59449	3074	2	1. 0.59843;2. 121;3. 361;4. 153;5. 153;6. 457;7. 207;8. 619;9. 232;10. R;11. CGT	1. 0.56095;2. 645;3. 1933;4. 729;5. 729;6. 2185;7. 850;8. 2548;9. 1456;10. V;11. GTG
ERS451417_01416	1717.62.peg.1422	NA	NA	NA	1	35	Cargentoratense_DSM44202,"Catypicum_R2070","Caurimucosum_ATCC700975","Cbelfantii_FRC0043","Ccallunae_DSM20147","Ccamporealensis_DSM44610","Cdeserti_GIMN1010","Cdiphtheriae_NCTC11397","Cdoosanense_DSM45436","Cefficiens_YS314","Cepidermidicanis_DSM45586","Cfalsenii_DSM44353","Cglutamicum_ATCC13032","Cglycinophilum_AJ3170","Chalotolerans_YIM70093","Cimitans_DSM44264","Cjeikeium_K41","Ckroppenstedtii…	0.104812	0.104812	1.45948	0.104812	0.104812	1.45948	1282	0
ERS451417_00872	1717.62.peg.878	NA	NA	NA	1	39	Cargentoratense_DSM44202,"Catypicum_R2070","Caurimucosum_ATCC700975","Cbelfantii_FRC0043","Ccallunae_DSM20147","Ccamporealensis_DSM44610","Cdeserti_GIMN1010","Cdiphtheriae_NCTC11397","Cdoosanense_DSM45436","Cefficiens_YS314","Cepidermidicanis_DSM45586","Cfalsenii_DSM44353","Cglutamicum_ATCC13032","Cglycinophilum_AJ3170","Chalotolerans_YIM70093","Chumireducens_DSM45392","Cimitans_DSM44264","Cjeike…	0.135525	0.135525	1.9201	0.135525	0.135525	1.92009	2	1	1. 0.61386;2. 72;3. 214;4. 74;5. 74;6. 220;7. 74;8. 220;9. 202;10. D;11. GAT
ERS451417_00655	1717.62.peg.660	NA	NA	NA	1	39	Cargentoratense_DSM44202,"Catypicum_R2070","Caurimucosum_ATCC700975","Cbelfantii_FRC0043","Ccallunae_DSM20147","Ccamporealensis_DSM44610","Cdeserti_GIMN1010","Cdiphtheriae_NCTC11397","Cdoosanense_DSM45436","Cefficiens_YS314","Cepidermidicanis_DSM45586","Cfalsenii_DSM44353","Cglutamicum_ATCC13032","Cglycinophilum_AJ3170","Chalotolerans_YIM70093","Chumireducens_DSM45392","Cimitans_DSM44264","Cjeike…	0.130213	0.130213	1.82341	0.130213	0.130213	1.8234	258	0
ERS451417_00715	1717.62.peg.720	NA	NA	NA	1	16	Cargentoratense_DSM44202,"Cbelfantii_FRC0043","Cdeserti_GIMN1010","Cdiphtheriae_NCTC11397","Cefficiens_YS314","Cepidermidicanis_DSM45586","Cglutamicum_ATCC13032","Ckroppenstedtii_DSM44385","Clactis_RW25","Cmustelae_DSM45274","Cpseudotuberculosis_31","Cpseudotuberculosis_ATCC19410","Crouxii_FRC0190","Culcerans_NCTC12077","Culcerans_NCTC7910","Cvitaeruminis_DSM20294"	0.163115	0.163115	2.1137	0.163115	0.163115	2.1137	2050	1	1. 0.52028;2. 296;3. 886;4. 316;5. 316;6. 946;7. 412;8. 1234;9. 706;10. G;11. GGG
ERS451417_01309	1717.62.peg.1317	NA	NA	NA	1	38	Cargentoratense_DSM44202,"Catypicum_R2070","Caurimucosum_ATCC700975","Cbelfantii_FRC0043","Ccallunae_DSM20147","Ccamporealensis_DSM44610","Cdeserti_GIMN1010","Cdiphtheriae_NCTC11397","Cdoosanense_DSM45436","Cefficiens_YS314","Cepidermidicanis_DSM45586","Cfalsenii_DSM44353","Cglutamicum_ATCC13032","Cglycinophilum_AJ3170","Chalotolerans_YIM70093","Chumireducens_DSM45392","Cimitans_DSM44264","Cjeike…	0.122134	0.122134	1.56102	0.122134	0.122134	1.56102	258	0
ERS451417_00636	1717.62.peg.640	NA	NA	NA	1	38	Cargentoratense_DSM44202,"Catypicum_R2070","Caurimucosum_ATCC700975","Cbelfantii_FRC0043","Ccallunae_DSM20147","Ccamporealensis_DSM44610","Cdeserti_GIMN1010","Cdiphtheriae_NCTC11397","Cdoosanense_DSM45436","Cefficiens_YS314","Cepidermidicanis_DSM45586","Cglutamicum_ATCC13032","Cglycinophilum_AJ3170","Chalotolerans_YIM70093","Chumireducens_DSM45392","Cimitans_DSM44264","Cjeikeium_K41","Ckroppenste…	0.0456018	0.0456018	1.59034	0.0456018	0.0456018	1.59033	258	0
ERS451417_00812	1717.62.peg.818	NA	NA	NA	1	39	Cargentoratense_DSM44202,"Catypicum_R2070","Caurimucosum_ATCC700975","Cbelfantii_FRC0043","Ccallunae_DSM20147","Ccamporealensis_DSM44610","Cdeserti_GIMN1010","Cdiphtheriae_NCTC11397","Cdoosanense_DSM45436","Cefficiens_YS314","Cepidermidicanis_DSM45586","Cfalsenii_DSM44353","Cglutamicum_ATCC13032","Cglycinophilum_AJ3170","Chalotolerans_YIM70093","Chumireducens_DSM45392","Cimitans_DSM44264","Cjeike…	0.0902305	0.0902305	1.79278	0.0902305	0.0902305	1.79278	3330	0
ERS451417_00451	1717.62.peg.455	NA	NA	NA	1	10	Cbelfantii_FRC0043,"Ccamporealensis_DSM44610","Cdiphtheriae_NCTC11397","Cepidermidicanis_DSM45586","Cpseudotuberculosis_31","Crouxii_FRC0190","Csilvaticum_KL0182","Ctestudinoris_DSM44614","Culcerans_NCTC12077","Culcerans_NCTC7910"	0.162941	0.162941	3.24012	0.162941	0.162941	3.24016	258	0
ERS451417_01965	1717.62.peg.1965	NA	NA	NA	1	10	Cbelfantii_FRC0043,"Cdiphtheriae_NCTC11397","Ckutscheri_DSM20755","Cmustelae_DSM45274","Cpseudotuberculosis_31","Cpseudotuberculosis_ATCC19410","Csilvaticum_KL0182","Culcerans_NCTC12077","Culcerans_NCTC7910","Cvitaeruminis_DSM20294"	0.072002	0.072002	2.30749	0.072002	0.072002	2.30749	258	0
ERS451417_02069	1717.62.peg.2081	NA	NA	NA	1	21	Cbelfantii_FRC0043,"Ccallunae_DSM20147","Cdiphtheriae_NCTC11397","Cdoosanense_DSM45436","Cglutamicum_ATCC13032","Chalotolerans_YIM70093","Cimitans_DSM44264","Ckutscheri_DSM20755","Cmarinum_DSM44953","Cmaris_DSM45190","Cpseudotuberculosis_31","Cpseudotuberculosis_ATCC19410","CriegeliiPUDD83A45","Csilvaticum_KL0182","Csimulans_PES1","Ctestudinoris_DSM44614","Culcerans_NCTC12077","Culcerans_NCTC7910…	0.0828874	0.0828874	1.43245	0.0828874	0.0828874	1.43245	258	0
ERS451417_01217	1717.62.peg.1225	NA	NA	NA	1	28	Catypicum_R2070,"Caurimucosum_ATCC700975","Cbelfantii_FRC0043","Ccallunae_DSM20147","Ccamporealensis_DSM44610","Cdeserti_GIMN1010","Cdiphtheriae_NCTC11397","Cdoosanense_DSM45436","Cefficiens_YS314","Cepidermidicanis_DSM45586","Cglutamicum_ATCC13032","Chalotolerans_YIM70093","Chumireducens_DSM45392","Ckutscheri_DSM20755","Cmarinum_DSM44953","Cmaris_DSM45190","Cmustelae_DSM45274","Cpseudotuberculos…	0.258655	0.258655	1.66087	0.258655	0.258655	1.66087	2306	0
ERS451417_01894	1717.62.peg.1893	NA	NA	NA	1	38	Cargentoratense_DSM44202,"Catypicum_R2070","Caurimucosum_ATCC700975","Cbelfantii_FRC0043","Ccallunae_DSM20147","Ccamporealensis_DSM44610","Cdeserti_GIMN1010","Cdiphtheriae_NCTC11397","Cdoosanense_DSM45436","Cefficiens_YS314","Cepidermidicanis_DSM45586","Cfalsenii_DSM44353","Cglutamicum_ATCC13032","Cglycinophilum_AJ3170","Chalotolerans_YIM70093","Chumireducens_DSM45392","Cimitans_DSM44264","Cjeike…	0.159625	0.159625	1.94092	0.159625	0.159625	1.94092	258	0
ERS451417_01176	1717.62.peg.1185	NA	NA	NA	1	8	Cbelfantii_FRC0043,"Cdiphtheriae_NCTC11397","Cpseudotuberculosis_31","Cpseudotuberculosis_ATCC19410","Crouxii_FRC0190","Csilvaticum_KL0182","Culcerans_NCTC12077","Culcerans_NCTC7910"	0.682751	0.682751	3.581	0.682751	0.682751	3.58099	2306	0
ERS451417_00313	1717.62.peg.314	NA	NA	NA	1	38	Catypicum_R2070,"Caurimucosum_ATCC700975","Cbelfantii_FRC0043","Ccallunae_DSM20147","Ccamporealensis_DSM44610","Cdeserti_GIMN1010","Cdiphtheriae_NCTC11397","Cdoosanense_DSM45436","Cefficiens_YS314","Cepidermidicanis_DSM45586","Cfalsenii_DSM44353","Cglutamicum_ATCC13032","Cglycinophilum_AJ3170","Chalotolerans_YIM70093","Chumireducens_DSM45392","Cimitans_DSM44264","Cjeikeium_K41","Ckroppenstedtii_D…	0.126792	0.126792	2.10058	0.126792	0.126792	2.10057	258	0
ERS451417_01363	1717.62.peg.1371	NA	NA	NA	1	30	Cargentoratense_DSM44202,"Caurimucosum_ATCC700975","Cbelfantii_FRC0043","Ccallunae_DSM20147","Ccamporealensis_DSM44610","Cdeserti_GIMN1010","Cdiphtheriae_NCTC11397","Cdoosanense_DSM45436","Cefficiens_YS314","Cglutamicum_ATCC13032","Cglycinophilum_AJ3170","Chalotolerans_YIM70093","Chumireducens_DSM45392","Cimitans_DSM44264","Ckutscheri_DSM20755","Clactis_RW25","Cmarinum_DSM44953","Cmaris_DSM45190"…	0.257277	0.257277	1.65495	0.257277	0.257277	1.65495	2	1	1. 0.46863;2. 122;3. 364;4. 131;5. 131;6. 391;7. 141;8. 421;9. 274;10. G;11. GGA
ERS451417_01440	1717.62.peg.1447	NA	NA	NA	1	37	Cargentoratense_DSM44202,"Catypicum_R2070","Caurimucosum_ATCC700975","Cbelfantii_FRC0043","Ccallunae_DSM20147","Ccamporealensis_DSM44610","Cdeserti_GIMN1010","Cdiphtheriae_NCTC11397","Cdoosanense_DSM45436","Cefficiens_YS314","Cepidermidicanis_DSM45586","Cfalsenii_DSM44353","Cglutamicum_ATCC13032","Cglycinophilum_AJ3170","Chalotolerans_YIM70093","Chumireducens_DSM45392","Cimitans_DSM44264","Cjeike…	0.110364	0.110364	1.49577	0.110364	0.110364	1.49577	2	2	1. 0.49984;2. 452;3. 1354;4. 500;5. 500;6. 1498;7. 580;8. 1738;9. 1297;10. D;11. GAC	1. 0.52687;2. 770;3. 2308;4. 826;5. 826;6. 2476;7. 942;8. 2824;9. 2131;10. E;11. GAA
ERS451417_00098	1717.62.peg.96	NA	NA	NA	1	10	Cbelfantii_FRC0043,"Cdiphtheriae_NCTC11397","Cmustelae_DSM45274","Cpseudotuberculosis_31","Cpseudotuberculosis_ATCC19410","Crouxii_FRC0190","Csilvaticum_KL0182","Culcerans_NCTC12077","Culcerans_NCTC7910","Cvitaeruminis_DSM20294"	0.135917	0.135917	3.08097	0.135917	0.135917	3.08098	258	0
ERS451417_00519	1717.62.peg.523	NA	NA	NA	1	8	Cbelfantii_FRC0043,"Cdiphtheriae_NCTC11397","Clactis_RW25","Cpseudotuberculosis_31","Cpseudotuberculosis_ATCC19410","Csilvaticum_KL0182","Culcerans_NCTC12077","Culcerans_NCTC7910"	0.364602	0.147991	3.43585	0.364602	0.147991	3.43585	2	2	1. 0.7703;2. 27;3. 79;4. 31;5. 30;6. 88;7. 39;8. 115;9. 37;10. L;11. TTG	1. 0.84555;2. 58;3. 172;4. 62;5. 61;6. 181;7. 70;8. 208;9. 130;10. V;11. GTG
ERS451417_00251	1717.62.peg.246	NA	NA	NA	1	8	Cbelfantii_FRC0043,"Cdiphtheriae_NCTC11397","Cpseudotuberculosis_31","Cpseudotuberculosis_ATCC19410","Crouxii_FRC0190","Csilvaticum_KL0182","Culcerans_NCTC12077","Culcerans_NCTC7910"	0.241553	0.24122	3.75103	0.245086	0.241203	3.75564	2	2	1. 0.56221;2. 96;3. 286;4. 110;5. 96;6. 286;7. 96;8. 286;9. 286;10. R;11. CGT	1. 0.53954;2. 105;3. 313;4. 119;5. 105;6. 313;7. 105;8. 313;9. 313;10. L;11. CTG
ERS451417_01244	1717.62.peg.1252	NA	NA	NA	1	16	Cbelfantii_FRC0043,"Ccallunae_DSM20147","Cdeserti_GIMN1010","Cdiphtheriae_NCTC11397","Cefficiens_YS314","Cglutamicum_ATCC13032","Chalotolerans_YIM70093","Chumireducens_DSM45392","Cmarinum_DSM44953","Cpseudotuberculosis_31","Cpseudotuberculosis_ATCC19410","Crouxii_FRC0190","Csilvaticum_KL0182","Culcerans_NCTC12077","Culcerans_NCTC7910","Cvitaeruminis_DSM20294"	0.416881	0.32453	1.68335	0.416881	0.32453	1.68335	2	2	1. 0.60211;2. 159;3. 475;4. 199;5. 169;6. 505;7. 175;8. 523;9. 370;10. A;11. GCA	1. 0.61078;2. 216;3. 646;4. 257;5. 226;6. 676;7. 232;8. 694;9. 541;10. I;11. ATC
ERS451417_00799	1717.62.peg.805	NA	NA	NA	1	7	Cbelfantii_FRC0043,"Cdiphtheriae_NCTC11397","Cpseudotuberculosis_31","Cpseudotuberculosis_ATCC19410","Crouxii_FRC0190","Culcerans_NCTC12077","Culcerans_NCTC7910"	0.330347	0.085277	2.19916	0.330347	0.085277	2.19916	2	3	1. 0.77381;2. 60;3. 178;4. 144;5. 93;6. 277;7. 126;8. 376;9. 178;10. D;11. GAC	1. 0.61249;2. 62;3. 184;4. 146;5. 95;6. 283;7. 128;8. 382;9. 184;10. P;11. CCA	1. 0.80997;2. 234;3. 700;4. 371;5. 267;6. 799;7. 300;8. 898;9. 700;10. T;11. ACG
ERS451417_00675	1717.62.peg.682	NA	NA	NA	1	37	Cargentoratense_DSM44202,"Catypicum_R2070","Caurimucosum_ATCC700975","Cbelfantii_FRC0043","Ccallunae_DSM20147","Ccamporealensis_DSM44610","Cdeserti_GIMN1010","Cdiphtheriae_NCTC11397","Cdoosanense_DSM45436","Cefficiens_YS314","Cepidermidicanis_DSM45586","Cfalsenii_DSM44353","Cglutamicum_ATCC13032","Cglycinophilum_AJ3170","Chalotolerans_YIM70093","Chumireducens_DSM45392","Cimitans_DSM44264","Cjeike…	0.185894	0.185894	1.66501	0.185894	0.185894	1.66502	3330	0
ERS451417_01463	1717.62.peg.1473	NA	NA	NA	1	30	Cargentoratense_DSM44202,"Catypicum_R2070","Caurimucosum_ATCC700975","Cbelfantii_FRC0043","Ccallunae_DSM20147","Ccamporealensis_DSM44610","Cdeserti_GIMN1010","Cdiphtheriae_NCTC11397","Cdoosanense_DSM45436","Cefficiens_YS314","Cepidermidicanis_DSM45586","Cglutamicum_ATCC13032","Chalotolerans_YIM70093","Chumireducens_DSM45392","Cimitans_DSM44264","Ckutscheri_DSM20755","Cmarinum_DSM44953","Cmaris_DS…	0.05828	0.05828	1.25301	0.05828	0.05828	1.25301	3330	0
ERS451417_01577	1717.62.peg.1586	NA	NA	NA	1	32	Cargentoratense_DSM44202,"Catypicum_R2070","Caurimucosum_ATCC700975","Cbelfantii_FRC0043","Ccamporealensis_DSM44610","Cdiphtheriae_NCTC11397","Cdoosanense_DSM45436","Cepidermidicanis_DSM45586","Cfalsenii_DSM44353","Cglycinophilum_AJ3170","Chalotolerans_YIM70093","Chumireducens_DSM45392","Cimitans_DSM44264","Cjeikeium_K41","Ckroppenstedtii_DSM44385","Ckutscheri_DSM20755","Cmarinum_DSM44953","Cmari…	0.08706	0.08706	1.51642	0.0870695	0.0870695	1.51642	7426	0
ERS451417_01773	1717.62.peg.1775	NA	NA	NA	1	23	Cargentoratense_DSM44202,"Cbelfantii_FRC0043","Ccallunae_DSM20147","Ccamporealensis_DSM44610","Cdeserti_GIMN1010","Cdiphtheriae_NCTC11397","Cefficiens_YS314","Cglutamicum_ATCC13032","Chalotolerans_YIM70093","Cimitans_DSM44264","Cjeikeium_K41","Ckutscheri_DSM20755","Clactis_RW25","Cmarinum_DSM44953","Cpseudotuberculosis_ATCC19410","Csilvaticum_KL0182","Csimulans_PES1","Ctestudinoris_DSM44614","Cul…	0.187481	0.169948	1.95004	0.190793	0.169766	1.95177	2	1	1. 0.65903;2. 248;3. 742;4. 273;5. 259;6. 775;7. 270;8. 808;9. 715;10. Y;11. TAC
ERS451417_01186	1717.62.peg.1195	NA	NA	NA	1	10	Cbelfantii_FRC0043,"Cdiphtheriae_NCTC11397","Cmustelae_DSM45274","Cpseudotuberculosis_31","Cpseudotuberculosis_ATCC19410","Crouxii_FRC0190","Csilvaticum_KL0182","Culcerans_NCTC12077","Culcerans_NCTC7910","Cvitaeruminis_DSM20294"	0.123748	0.123748	3.98983	0.123748	0.123748	3.98983	2	1	1. 0.58649;2. 121;3. 361;4. 130;5. 130;6. 388;7. 130;8. 388;9. 358;10. R;11. CGC
ERS451417_01741	1717.62.peg.1745	NA	NA	NA	1	38	Cargentoratense_DSM44202,"Catypicum_R2070","Caurimucosum_ATCC700975","Cbelfantii_FRC0043","Ccallunae_DSM20147","Ccamporealensis_DSM44610","Cdeserti_GIMN1010","Cdiphtheriae_NCTC11397","Cdoosanense_DSM45436","Cefficiens_YS314","Cepidermidicanis_DSM45586","Cfalsenii_DSM44353","Cglutamicum_ATCC13032","Cglycinophilum_AJ3170","Chalotolerans_YIM70093","Chumireducens_DSM45392","Cimitans_DSM44264","Cjeike…	0.103661	0.103661	1.47178	0.103661	0.103661	1.47178	258	0
ERS451417_00015	1717.62.peg.15	NA	NA	NA	1	7	Cdiphtheriae_NCTC11397,"Cpseudotuberculosis_31","Cpseudotuberculosis_ATCC19410","Crouxii_FRC0190","Csilvaticum_KL0182","Culcerans_NCTC12077","Culcerans_NCTC7910"	0.295561	0.234524	4.52033	0.300087	0.23394	4.51762	3074	2	1. 0.43178;2. 79;3. 235;4. 893;5. 121;6. 361;7. 124;8. 370;9. 166;10. D;11. GAC	1. 0.64529;2. 91;3. 271;4. 905;5. 133;6. 397;7. 136;8. 406;9. 202;10. D;11. GAC
ERS451417_00468	1717.62.peg.472	NA	NA	NA	1	12	Cbelfantii_FRC0043,"Cdiphtheriae_NCTC11397","Ckutscheri_DSM20755","Cmustelae_DSM45274","Cpseudotuberculosis_31","Cpseudotuberculosis_ATCC19410","Crouxii_FRC0190","Csilvaticum_KL0182","Culcerans_NCTC12077","Culcerans_NCTC7910","Cuterequi_DSM45634","Cvitaeruminis_DSM20294"	0.162765	0.162765	3.17346	0.162765	0.162765	3.17346	258	0
ERS451417_00398	1717.62.peg.398	NA	NA	NA	1	39	Cargentoratense_DSM44202,"Catypicum_R2070","Caurimucosum_ATCC700975","Cbelfantii_FRC0043","Ccallunae_DSM20147","Ccamporealensis_DSM44610","Cdeserti_GIMN1010","Cdiphtheriae_NCTC11397","Cdoosanense_DSM45436","Cefficiens_YS314","Cepidermidicanis_DSM45586","Cfalsenii_DSM44353","Cglutamicum_ATCC13032","Cglycinophilum_AJ3170","Chalotolerans_YIM70093","Chumireducens_DSM45392","Cimitans_DSM44264","Cjeike…	0.131678	0.131678	1.67139	0.131687	0.131687	1.67139	258	0
ERS451417_01202	1717.62.peg.1210	NA	NA	NA	1	39	Cargentoratense_DSM44202,"Catypicum_R2070","Caurimucosum_ATCC700975","Cbelfantii_FRC0043","Ccallunae_DSM20147","Ccamporealensis_DSM44610","Cdeserti_GIMN1010","Cdiphtheriae_NCTC11397","Cdoosanense_DSM45436","Cefficiens_YS314","Cepidermidicanis_DSM45586","Cfalsenii_DSM44353","Cglutamicum_ATCC13032","Cglycinophilum_AJ3170","Chalotolerans_YIM70093","Chumireducens_DSM45392","Cimitans_DSM44264","Cjeike…	0.149859	0.149859	1.5879	0.149859	0.149859	1.5879	3330	0
ERS451417_00572	1717.62.peg.575	NA	NA	NA	1	38	Cargentoratense_DSM44202,"Catypicum_R2070","Caurimucosum_ATCC700975","Cbelfantii_FRC0043","Ccallunae_DSM20147","Ccamporealensis_DSM44610","Cdeserti_GIMN1010","Cdiphtheriae_NCTC11397","Cdoosanense_DSM45436","Cefficiens_YS314","Cepidermidicanis_DSM45586","Cfalsenii_DSM44353","Cglutamicum_ATCC13032","Cglycinophilum_AJ3170","Chalotolerans_YIM70093","Chumireducens_DSM45392","Cimitans_DSM44264","Cjeike…	0.14858	0.14858	1.47854	0.14858	0.14858	1.47854	3074	1	1. 0.4864;2. 285;3. 853;4. 380;5. 335;6. 1003;7. 411;8. 1231;9. 523;10. D;11. GAC
ERS451417_00453	1717.62.peg.457	NA	NA	NA	1	17	Cbelfantii_FRC0043,"Ccallunae_DSM20147","Ccamporealensis_DSM44610","Cdeserti_GIMN1010","Cdiphtheriae_NCTC11397","Cepidermidicanis_DSM45586","Cglutamicum_ATCC13032","Ckroppenstedtii_DSM44385","Ckutscheri_DSM20755","Cpseudotuberculosis_31","Cpseudotuberculosis_ATCC19410","Crouxii_FRC0190","Csilvaticum_KL0182","Ctestudinoris_DSM44614","Culcerans_NCTC12077","Culcerans_NCTC7910","Cuterequi_DSM45634"	0.165536	0.165536	2.16577	0.165536	0.165536	2.16576	2306	0
ERS451417_00541	1717.62.peg.545	NA	NA	NA	1	9	Cbelfantii_FRC0043,"Cdiphtheriae_NCTC11397","Cglycinophilum_AJ3170","Cpseudotuberculosis_31","Cpseudotuberculosis_ATCC19410","Crouxii_FRC0190","Csilvaticum_KL0182","Culcerans_NCTC12077","Culcerans_NCTC7910"	0.0742911	0.0742911	2.51627	0.0742911	0.0742911	2.51627	2	1	1. 0.43888;2. 216;3. 646;4. 220;5. 220;6. 658;7. 230;8. 688;9. 541;10. I;11. ATC
ERS451417_00070	1717.62.peg.66	NA	NA	NA	1	10	Cbelfantii_FRC0043,"Cdiphtheriae_NCTC11397","Cepidermidicanis_DSM45586","Ckutscheri_DSM20755","Cpseudotuberculosis_31","Cpseudotuberculosis_ATCC19410","Crouxii_FRC0190","Csilvaticum_KL0182","Culcerans_NCTC12077","Culcerans_NCTC7910"	0.357451	0.357451	4.79209	0.357451	0.357451	4.79208	2	1	1. 0.60606;2. 59;3. 175;4. 100;5. 75;6. 223;7. 86;8. 256;9. 94;10. R;11. CGC
ERS451417_00640	1717.62.peg.644	NA	NA	NA	1	39	Cargentoratense_DSM44202,"Catypicum_R2070","Caurimucosum_ATCC700975","Cbelfantii_FRC0043","Ccallunae_DSM20147","Ccamporealensis_DSM44610","Cdeserti_GIMN1010","Cdiphtheriae_NCTC11397","Cdoosanense_DSM45436","Cefficiens_YS314","Cepidermidicanis_DSM45586","Cfalsenii_DSM44353","Cglutamicum_ATCC13032","Cglycinophilum_AJ3170","Chalotolerans_YIM70093","Chumireducens_DSM45392","Cimitans_DSM44264","Cjeike…	0.131749	0.131749	1.74494	0.131749	0.131749	1.74494	3074	1	1. 0.5678;2. 287;3. 859;4. 347;5. 347;6. 1039;7. 409;8. 1225;9. 691;10. R;11. CGA
ERS451417_02379	1717.62.peg.2410	NA	NA	NA	1	31	Cargentoratense_DSM44202,"Catypicum_R2070","Caurimucosum_ATCC700975","Cbelfantii_FRC0043","Ccallunae_DSM20147","Ccamporealensis_DSM44610","Cdeserti_GIMN1010","Cdiphtheriae_NCTC11397","Cdoosanense_DSM45436","Cefficiens_YS314","Cepidermidicanis_DSM45586","Cglutamicum_ATCC13032","Chalotolerans_YIM70093","Chumireducens_DSM45392","Cimitans_DSM44264","Ckutscheri_DSM20755","Cmarinum_DSM44953","Cmaris_DS…	0.16431	0.16431	1.89558	0.16431	0.16431	1.89558	258	0
ERS451417_01649	1717.62.peg.1656	NA	NA	NA	1	37	Cargentoratense_DSM44202,"Catypicum_R2070","Caurimucosum_ATCC700975","Cbelfantii_FRC0043","Ccallunae_DSM20147","Ccamporealensis_DSM44610","Cdeserti_GIMN1010","Cdiphtheriae_NCTC11397","Cdoosanense_DSM45436","Cefficiens_YS314","Cepidermidicanis_DSM45586","Cfalsenii_DSM44353","Cglutamicum_ATCC13032","Cglycinophilum_AJ3170","Chalotolerans_YIM70093","Chumireducens_DSM45392","Cimitans_DSM44264","Cjeike…	0.191621	0.191621	1.76432	0.191621	0.191621	1.76432	258	0
ERS451417_01587	1717.62.peg.1596	NA	NA	NA	1	36	Cargentoratense_DSM44202,"Caurimucosum_ATCC700975","Cbelfantii_FRC0043","Ccallunae_DSM20147","Ccamporealensis_DSM44610","Cdeserti_GIMN1010","Cdiphtheriae_NCTC11397","Cdoosanense_DSM45436","Cefficiens_YS314","Cepidermidicanis_DSM45586","Cfalsenii_DSM44353","Cglutamicum_ATCC13032","Cglycinophilum_AJ3170","Chalotolerans_YIM70093","Chumireducens_DSM45392","Cimitans_DSM44264","Cjeikeium_K41","Ckroppen…	0.425149	0.252889	1.61755	0.425177	0.252889	1.61755	2	2	1. 0.84692;2. 209;3. 625;4. 242;5. 242;6. 724;7. 302;8. 904;9. 565;10. A;11. GCT	1. 0.62713;2. 272;3. 814;4. 305;5. 305;6. 913;7. 365;8. 1093;9. 754;10. R;11. CGG
ERS451417_00230	1717.62.peg.226	NA	NA	NA	1	38	Cargentoratense_DSM44202,"Catypicum_R2070","Caurimucosum_ATCC700975","Cbelfantii_FRC0043","Ccallunae_DSM20147","Ccamporealensis_DSM44610","Cdeserti_GIMN1010","Cdiphtheriae_NCTC11397","Cdoosanense_DSM45436","Cefficiens_YS314","Cepidermidicanis_DSM45586","Cfalsenii_DSM44353","Cglutamicum_ATCC13032","Cglycinophilum_AJ3170","Chalotolerans_YIM70093","Chumireducens_DSM45392","Cimitans_DSM44264","Cjeike…	0.184775	0.184775	1.97092	0.184775	0.184775	1.97092	3074	1	1. 0.66641;2. 118;3. 352;4. 149;5. 149;6. 445;7. 158;8. 472;9. 142;10. I;11. ATC
ERS451417_01201	1717.62.peg.1209	NA	NA	NA	1	26	Caurimucosum_ATCC700975,"Cbelfantii_FRC0043","Ccallunae_DSM20147","Ccamporealensis_DSM44610","Cdeserti_GIMN1010","Cdiphtheriae_NCTC11397","Cefficiens_YS314","Cepidermidicanis_DSM45586","Cglutamicum_ATCC13032","Chalotolerans_YIM70093","Chumireducens_DSM45392","Cimitans_DSM44264","Cmarinum_DSM44953","Cmaris_DSM45190","Cmustelae_DSM45274","Cpseudotuberculosis_31","Cpseudotuberculosis_ATCC19410","Cri…	0.13699	0.13699	1.70632	0.13699	0.13699	1.70632	3074	3	1. 0.46535;2. 99;3. 295;4. 136;5. 120;6. 358;7. 143;8. 427;9. 229;10. S;11. TCC	1. 0.43712;2. 275;3. 823;4. 329;5. 299;6. 895;7. 344;8. 1030;9. 673;10. A;11. GCG	1. 0.50774;2. 307;3. 919;4. 361;5. 331;6. 991;7. 376;8. 1126;9. 769;10. T;11. ACC
ERS451417_00483	1717.62.peg.486	NA	NA	NA	1	39	Cargentoratense_DSM44202,"Catypicum_R2070","Caurimucosum_ATCC700975","Cbelfantii_FRC0043","Ccallunae_DSM20147","Ccamporealensis_DSM44610","Cdeserti_GIMN1010","Cdiphtheriae_NCTC11397","Cdoosanense_DSM45436","Cefficiens_YS314","Cepidermidicanis_DSM45586","Cfalsenii_DSM44353","Cglutamicum_ATCC13032","Cglycinophilum_AJ3170","Chalotolerans_YIM70093","Chumireducens_DSM45392","Cimitans_DSM44264","Cjeike…	0.094854	0.094854	1.99015	0.094854	0.094854	1.99015	258	0
ERS451417_02234	1717.62.peg.2259	NA	NA	NA	1	6	Cbelfantii_FRC0043,"Cdiphtheriae_NCTC11397","Cpseudotuberculosis_31","Cpseudotuberculosis_ATCC19410","Culcerans_NCTC12077","Culcerans_NCTC7910"	0.402881	0.402881	4.03748	0.402881	0.402881	4.03748	2	1	1. 0.50211;2. 62;3. 184;4. 223;5. 65;6. 193;7. 66;8. 196;9. 109;10. V;11. GTG
ERS451417_01397	1717.62.peg.1410	NA	NA	NA	1	7	Cbelfantii_FRC0043,"Cdiphtheriae_NCTC11397","Cpseudotuberculosis_31","Cpseudotuberculosis_ATCC19410","Csilvaticum_KL0182","Culcerans_NCTC12077","Culcerans_NCTC7910"	0.26253	0.26253	3.2528	0.26253	0.26253	3.2528	2306	0
ERS451417_01147	1717.62.peg.1158	NA	NA	NA	1	39	Cargentoratense_DSM44202,"Catypicum_R2070","Caurimucosum_ATCC700975","Cbelfantii_FRC0043","Ccallunae_DSM20147","Ccamporealensis_DSM44610","Cdeserti_GIMN1010","Cdiphtheriae_NCTC11397","Cdoosanense_DSM45436","Cefficiens_YS314","Cepidermidicanis_DSM45586","Cfalsenii_DSM44353","Cglutamicum_ATCC13032","Cglycinophilum_AJ3170","Chalotolerans_YIM70093","Chumireducens_DSM45392","Cimitans_DSM44264","Cjeike…	0.0745862	0.0744399	1.48462	0.0746642	0.0744302	1.48462	2	2	1. 0.48055;2. 49;3. 145;4. 59;5. 59;6. 175;7. 68;8. 202;9. 82;10. A;11. GCA	1. 0.48301;2. 604;3. 1810;4. 614;5. 614;6. 1840;7. 623;8. 1867;9. 1747;10. H;11. CAC
ERS451417_00559	1717.62.peg.563	NA	NA	NA	1	22	Cargentoratense_DSM44202,"Caurimucosum_ATCC700975","Cbelfantii_FRC0043","Cdeserti_GIMN1010","Cdiphtheriae_NCTC11397","Cglutamicum_ATCC13032","Cglycinophilum_AJ3170","Cimitans_DSM44264","Cjeikeium_K41","Ckutscheri_DSM20755","Cmustelae_DSM45274","Cpseudotuberculosis_31","Cpseudotuberculosis_ATCC19410","CriegeliiPUDD83A45","Crouxii_FRC0190","Csilvaticum_KL0182","Csimulans_PES1","Csingulare_IBSB52218…	0.154424	0.154424	2.73359	0.154424	0.154424	2.73359	3330	0
ERS451417_01723	1717.62.peg.1726	NA	NA	NA	1	38	Cargentoratense_DSM44202,"Catypicum_R2070","Caurimucosum_ATCC700975","Cbelfantii_FRC0043","Ccallunae_DSM20147","Ccamporealensis_DSM44610","Cdeserti_GIMN1010","Cdiphtheriae_NCTC11397","Cdoosanense_DSM45436","Cefficiens_YS314","Cepidermidicanis_DSM45586","Cfalsenii_DSM44353","Cglutamicum_ATCC13032","Cglycinophilum_AJ3170","Chalotolerans_YIM70093","Chumireducens_DSM45392","Cimitans_DSM44264","Cjeike…	0.127942	0.127942	1.83807	0.127942	0.127942	1.83807	258	0
ERS451417_01671	1717.62.peg.1678	NA	NA	NA	1	16	Cbelfantii_FRC0043,"Ccamporealensis_DSM44610","Cdiphtheriae_NCTC11397","Cfalsenii_DSM44353","Chumireducens_DSM45392","Cjeikeium_K41","Ckutscheri_DSM20755","Clactis_RW25","Cpseudotuberculosis_31","Cpseudotuberculosis_ATCC19410","Csilvaticum_KL0182","Csimulans_PES1","Ctestudinoris_DSM44614","Culcerans_NCTC12077","Culcerans_NCTC7910","Cvitaeruminis_DSM20294"	0.152951	0.152951	2.36112	0.152951	0.152951	2.36112	258	0
ERS451417_01164	1717.62.peg.1175	NA	NA	NA	1	37	Cargentoratense_DSM44202,"Catypicum_R2070","Caurimucosum_ATCC700975","Cbelfantii_FRC0043","Ccallunae_DSM20147","Ccamporealensis_DSM44610","Cdeserti_GIMN1010","Cdiphtheriae_NCTC11397","Cdoosanense_DSM45436","Cefficiens_YS314","Cfalsenii_DSM44353","Cglutamicum_ATCC13032","Cglycinophilum_AJ3170","Chalotolerans_YIM70093","Chumireducens_DSM45392","Cimitans_DSM44264","Cjeikeium_K41","Ckroppenstedtii_DS…	0.171397	0.171397	1.61331	0.171397	0.171397	1.61331	3330	0
ERS451417_01442	1717.62.peg.1449	NA	NA	NA	1	28	Cargentoratense_DSM44202,"Caurimucosum_ATCC700975","Cbelfantii_FRC0043","Cdiphtheriae_NCTC11397","Cepidermidicanis_DSM45586","Cglycinophilum_AJ3170","Chalotolerans_YIM70093","Chumireducens_DSM45392","Cimitans_DSM44264","Ckroppenstedtii_DSM44385","Ckutscheri_DSM20755","Clactis_RW25","Cmarinum_DSM44953","Cmaris_DSM45190","Cmustelae_DSM45274","Cpseudotuberculosis_31","Cpseudotuberculosis_ATCC19410",…	0.109336	0.109336	1.9402	0.109336	0.109336	1.9402	2	1	1. 0.64083;2. 195;3. 583;4. 205;5. 199;6. 595;7. 199;8. 595;9. 580;10. K;11. AAG
ERS451417_00991	1717.62.peg.1002	NA	NA	NA	1	28	Cargentoratense_DSM44202,"Cbelfantii_FRC0043","Cdeserti_GIMN1010","Cdiphtheriae_NCTC11397","Cefficiens_YS314","Cepidermidicanis_DSM45586","Cfalsenii_DSM44353","Cglutamicum_ATCC13032","Cglycinophilum_AJ3170","Chalotolerans_YIM70093","Chumireducens_DSM45392","Cjeikeium_K41","Ckroppenstedtii_DSM44385","Ckutscheri_DSM20755","Cmarinum_DSM44953","Cmaris_DSM45190","Cmustelae_DSM45274","Cpseudotuberculos…	0.188286	0.188286	1.70293	0.188286	0.188286	1.70292	3074	1	1. 0.5485;2. 117;3. 349;4. 140;5. 140;6. 418;7. 189;8. 565;9. 244;10. I;11. ATC
ERS451417_00067	1717.62.peg.63	NA	NA	NA	1	15	Cbelfantii_FRC0043,"Cdiphtheriae_NCTC11397","Cdoosanense_DSM45436","Cefficiens_YS314","Chalotolerans_YIM70093","Chumireducens_DSM45392","Cmarinum_DSM44953","Cpseudotuberculosis_31","Cpseudotuberculosis_ATCC19410","Crouxii_FRC0190","Csilvaticum_KL0182","Ctestudinoris_DSM44614","Culcerans_NCTC12077","Culcerans_NCTC7910","Cvitaeruminis_DSM20294"	0.110791	0.110791	1.94887	0.110791	0.110791	1.94887	2306	0
ERS451417_01785	1717.62.peg.1790	NA	NA	NA	1	34	Catypicum_R2070,"Caurimucosum_ATCC700975","Cbelfantii_FRC0043","Ccallunae_DSM20147","Cdeserti_GIMN1010","Cdiphtheriae_NCTC11397","Cdoosanense_DSM45436","Cefficiens_YS314","Cepidermidicanis_DSM45586","Cfalsenii_DSM44353","Cglutamicum_ATCC13032","Cglycinophilum_AJ3170","Chalotolerans_YIM70093","Chumireducens_DSM45392","Cimitans_DSM44264","Cjeikeium_K41","Ckutscheri_DSM20755","Clactis_RW25","Cmarinu…	0.126944	0.126944	1.52337	0.126944	0.126944	1.52336	2050	1	1. 0.79893;2. 97;3. 289;4. 126;5. 126;6. 376;7. 148;8. 442;9. 193;10. L;11. CTC
ERS451417_01930	1717.62.peg.1927	NA	NA	NA	1	7	Cbelfantii_FRC0043,"Cdiphtheriae_NCTC11397","Cpseudotuberculosis_31","Cpseudotuberculosis_ATCC19410","Csilvaticum_KL0182","Culcerans_NCTC12077","Culcerans_NCTC7910"	0.439696	0.439696	7.72714	0.439696	0.439696	7.72715	258	0
ERS451417_01971	1717.62.peg.1971	NA	NA	NA	1	15	Caurimucosum_ATCC700975,"Cbelfantii_FRC0043","Ccamporealensis_DSM44610","Cdiphtheriae_NCTC11397","Ckutscheri_DSM20755","Cmustelae_DSM45274","Cpseudotuberculosis_31","Cpseudotuberculosis_ATCC19410","Csilvaticum_KL0182","Csimulans_PES1","Csingulare_IBSB52218","Ctestudinoris_DSM44614","Culcerans_NCTC12077","Culcerans_NCTC7910","Cvitaeruminis_DSM20294"	0.208628	0.208628	1.84893	0.208628	0.208628	1.84893	2	2	1. 0.58311;2. 84;3. 250;4. 132;5. 85;6. 253;7. 88;8. 262;9. 217;10. A;11. GCG	1. 0.59868;2. 172;3. 514;4. 249;5. 177;6. 529;7. 180;8. 538;9. 460;10. S;11. TCG
ERS451417_00716	1717.62.peg.721	NA	NA	NA	1	31	Cargentoratense_DSM44202,"Caurimucosum_ATCC700975","Cbelfantii_FRC0043","Ccallunae_DSM20147","Ccamporealensis_DSM44610","Cdeserti_GIMN1010","Cdiphtheriae_NCTC11397","Cefficiens_YS314","Cepidermidicanis_DSM45586","Cfalsenii_DSM44353","Cglycinophilum_AJ3170","Chalotolerans_YIM70093","Chumireducens_DSM45392","Cimitans_DSM44264","Cjeikeium_K41","Cmarinum_DSM44953","Cmaris_DSM45190","Cmustelae_DSM4527…	0.22579	0.17393	1.6969	0.22579	0.17393	1.6969	3074	3	1. 0.56659;2. 146;3. 436;4. 172;5. 164;6. 490;7. 271;8. 811;9. 340;10. Q;11. CAG	1. 0.61761;2. 174;3. 520;4. 200;5. 192;6. 574;7. 299;8. 895;9. 421;10. V;11. GTG	1. 0.64167;2. 183;3. 547;4. 209;5. 201;6. 601;7. 308;8. 922;9. 448;10. A;11. GCC
ERS451417_00924	1717.62.peg.931	NA	NA	NA	1	23	Catypicum_R2070,"Cbelfantii_FRC0043","Ccallunae_DSM20147","Ccamporealensis_DSM44610","Cdeserti_GIMN1010","Cdiphtheriae_NCTC11397","Cdoosanense_DSM45436","Cefficiens_YS314","Cglutamicum_ATCC13032","Chalotolerans_YIM70093","Chumireducens_DSM45392","Ckutscheri_DSM20755","Clactis_RW25","Cmarinum_DSM44953","Cmustelae_DSM45274","Cpseudotuberculosis_31","Crouxii_FRC0190","Csilvaticum_KL0182","Csimulans_…	0.203645	0.203645	1.97592	0.203645	0.203645	1.97592	2306	0
ERS451417_00413	1717.62.peg.413	NA	NA	NA	1	13	Catypicum_R2070,"Cbelfantii_FRC0043","Ccamporealensis_DSM44610","Cdiphtheriae_NCTC11397","Cepidermidicanis_DSM45586","Ckutscheri_DSM20755","Cpseudotuberculosis_31","Cpseudotuberculosis_ATCC19410","Crouxii_FRC0190","Csilvaticum_KL0182","Csimulans_PES1","Culcerans_NCTC12077","Culcerans_NCTC7910"	0.0876592	0.0876592	2.24697	0.0876691	0.0876691	2.24697	258	0
ERS451417_01307	1717.62.peg.1315	NA	NA	NA	1	37	Cargentoratense_DSM44202,"Catypicum_R2070","Caurimucosum_ATCC700975","Cbelfantii_FRC0043","Ccallunae_DSM20147","Ccamporealensis_DSM44610","Cdeserti_GIMN1010","Cdiphtheriae_NCTC11397","Cdoosanense_DSM45436","Cefficiens_YS314","Cepidermidicanis_DSM45586","Cfalsenii_DSM44353","Cglutamicum_ATCC13032","Cglycinophilum_AJ3170","Chalotolerans_YIM70093","Chumireducens_DSM45392","Cimitans_DSM44264","Cjeike…	0.0654351	0.0654351	2.07648	0.0654351	0.0654351	2.07648	258	0
ERS451417_00175	1717.62.peg.173	NA	NA	NA	1	8	Cbelfantii_FRC0043,"Cdiphtheriae_NCTC11397","Ckutscheri_DSM20755","Cpseudotuberculosis_31","Cpseudotuberculosis_ATCC19410","Csilvaticum_KL0182","Culcerans_NCTC12077","Culcerans_NCTC7910"	0.168332	0.168332	4.53905	0.168332	0.168332	4.5391	2	4	1. 0.44294;2. 65;3. 193;4. 284;5. 84;6. 250;7. 94;8. 280;9. 190;10. A;11. GCT	1. 0.54163;2. 70;3. 208;4. 289;5. 89;6. 265;7. 99;8. 295;9. 205;10. A;11. GCG	1. 0.59752;2. 130;3. 388;4. 357;5. 149;6. 445;7. 159;8. 475;9. 385;10. A;11. GCT	1. 0.70304;2. 215;3. 643;4. 460;5. 234;6. 700;7. 244;8. 730;9. 640;10. D;11. GAT
ERS451417_00882	1717.62.peg.888	NA	NA	NA	1	36	Cargentoratense_DSM44202,"Catypicum_R2070","Caurimucosum_ATCC700975","Cbelfantii_FRC0043","Ccallunae_DSM20147","Ccamporealensis_DSM44610","Cdeserti_GIMN1010","Cdiphtheriae_NCTC11397","Cdoosanense_DSM45436","Cefficiens_YS314","Cfalsenii_DSM44353","Cglutamicum_ATCC13032","Cglycinophilum_AJ3170","Chalotolerans_YIM70093","Chumireducens_DSM45392","Cimitans_DSM44264","Cjeikeium_K41","Ckroppenstedtii_DS…	0.147577	0.147577	2.08102	0.147577	0.147577	2.08103	3330	0
ERS451417_00514	1717.62.peg.518	NA	NA	NA	1	39	Cargentoratense_DSM44202,"Catypicum_R2070","Caurimucosum_ATCC700975","Cbelfantii_FRC0043","Ccallunae_DSM20147","Ccamporealensis_DSM44610","Cdeserti_GIMN1010","Cdiphtheriae_NCTC11397","Cdoosanense_DSM45436","Cefficiens_YS314","Cepidermidicanis_DSM45586","Cfalsenii_DSM44353","Cglutamicum_ATCC13032","Cglycinophilum_AJ3170","Chalotolerans_YIM70093","Chumireducens_DSM45392","Cimitans_DSM44264","Cjeike…	0.115303	0.115303	1.80298	0.115303	0.115303	1.80297	258	0
ERS451417_00152	1717.62.peg.149	NA	NA	NA	1	38	Cargentoratense_DSM44202,"Catypicum_R2070","Caurimucosum_ATCC700975","Cbelfantii_FRC0043","Ccallunae_DSM20147","Ccamporealensis_DSM44610","Cdeserti_GIMN1010","Cdiphtheriae_NCTC11397","Cdoosanense_DSM45436","Cefficiens_YS314","Cepidermidicanis_DSM45586","Cfalsenii_DSM44353","Cglutamicum_ATCC13032","Cglycinophilum_AJ3170","Chalotolerans_YIM70093","Chumireducens_DSM45392","Cimitans_DSM44264","Cjeike…	0.121218	0.121218	2.07237	0.121218	0.121218	2.07237	1282	0
ERS451417_01009	1717.62.peg.1020	NA	NA	NA	1	39	Cargentoratense_DSM44202,"Catypicum_R2070","Caurimucosum_ATCC700975","Cbelfantii_FRC0043","Ccallunae_DSM20147","Ccamporealensis_DSM44610","Cdeserti_GIMN1010","Cdiphtheriae_NCTC11397","Cdoosanense_DSM45436","Cefficiens_YS314","Cepidermidicanis_DSM45586","Cfalsenii_DSM44353","Cglutamicum_ATCC13032","Cglycinophilum_AJ3170","Chalotolerans_YIM70093","Chumireducens_DSM45392","Cimitans_DSM44264","Cjeike…	0.113809	0.113809	1.44042	0.113809	0.113809	1.44042	258	0
ERS451417_01627	1717.62.peg.1635	NA	NA	NA	1	5	Cbelfantii_FRC0043,"Cdiphtheriae_NCTC11397","Cpseudotuberculosis_ATCC19410","Csilvaticum_KL0182","Culcerans_NCTC7910"	0.138481	0.138431	4.28204	0.135674	0.135674	4.19125	4098	2	1. 0.45156;2. 58;3. 172;4. 124;5. 58;6. 172;7. 59;8. 175;9. 136;10. T;11. ACC	1. 0.43998;2. 120;3. 358;4. 187;5. 120;6. 358;7. 121;8. 361;9. 316;10. A;11. GCA
ERS451417_01404	1717.62.peg.1417	NA	NA	NA	1	38	Cargentoratense_DSM44202,"Catypicum_R2070","Caurimucosum_ATCC700975","Cbelfantii_FRC0043","Ccallunae_DSM20147","Ccamporealensis_DSM44610","Cdeserti_GIMN1010","Cdiphtheriae_NCTC11397","Cdoosanense_DSM45436","Cefficiens_YS314","Cepidermidicanis_DSM45586","Cfalsenii_DSM44353","Cglutamicum_ATCC13032","Cglycinophilum_AJ3170","Chalotolerans_YIM70093","Chumireducens_DSM45392","Cimitans_DSM44264","Cjeike…	0.145051	0.145051	1.59968	0.145051	0.145051	1.59968	2	1	1. 0.59736;2. 55;3. 163;4. 64;5. 64;6. 190;7. 190;8. 568;9. 13;10. F;11. TTT
ERS451417_00138	1717.62.peg.137	NA	NA	NA	1	8	Cbelfantii_FRC0043,"Cdiphtheriae_NCTC11397","Cmustelae_DSM45274","Cpseudotuberculosis_31","Crouxii_FRC0190","Csilvaticum_KL0182","Csingulare_IBSB52218","Culcerans_NCTC7910"	0.0814127	0.0814127	2.73265	0.0814127	0.0814127	2.73265	4354	0
ERS451417_01492	1717.62.peg.1500	NA	NA	NA	1	38	Cargentoratense_DSM44202,"Catypicum_R2070","Caurimucosum_ATCC700975","Cbelfantii_FRC0043","Ccallunae_DSM20147","Ccamporealensis_DSM44610","Cdeserti_GIMN1010","Cdiphtheriae_NCTC11397","Cdoosanense_DSM45436","Cefficiens_YS314","Cepidermidicanis_DSM45586","Cfalsenii_DSM44353","Cglutamicum_ATCC13032","Cglycinophilum_AJ3170","Chalotolerans_YIM70093","Chumireducens_DSM45392","Cimitans_DSM44264","Cjeike…	0.140892	0.140892	1.81301	0.140892	0.140892	1.81301	2	1	1. 0.57591;2. 287;3. 859;4. 411;5. 411;6. 1231;7. 522;8. 1564;9. 751;10. P;11. CCG
ERS451417_00293	1717.62.peg.294	NA	NA	NA	1	38	Cargentoratense_DSM44202,"Catypicum_R2070","Caurimucosum_ATCC700975","Cbelfantii_FRC0043","Ccallunae_DSM20147","Ccamporealensis_DSM44610","Cdeserti_GIMN1010","Cdiphtheriae_NCTC11397","Cdoosanense_DSM45436","Cefficiens_YS314","Cepidermidicanis_DSM45586","Cfalsenii_DSM44353","Cglutamicum_ATCC13032","Cglycinophilum_AJ3170","Chalotolerans_YIM70093","Chumireducens_DSM45392","Cimitans_DSM44264","Cjeike…	0.163054	0.163054	1.97969	0.163054	0.163054	1.97969	3074	1	1. 0.6162;2. 215;3. 643;4. 229;5. 229;6. 685;7. 241;8. 721;9. 409;10. I;11. ATT
ERS451417_00979	1717.62.peg.989	NA	NA	NA	1	36	Cargentoratense_DSM44202,"Catypicum_R2070","Caurimucosum_ATCC700975","Cbelfantii_FRC0043","Ccallunae_DSM20147","Ccamporealensis_DSM44610","Cdeserti_GIMN1010","Cdiphtheriae_NCTC11397","Cdoosanense_DSM45436","Cefficiens_YS314","Cepidermidicanis_DSM45586","Cfalsenii_DSM44353","Cglutamicum_ATCC13032","Cglycinophilum_AJ3170","Chalotolerans_YIM70093","Chumireducens_DSM45392","Cjeikeium_K41","Ckroppenst…	0.168962	0.168962	1.53882	0.168962	0.168962	1.53882	2306	0
ERS451417_01015	1717.62.peg.1026	NA	NA	NA	1	39	Cargentoratense_DSM44202,"Catypicum_R2070","Caurimucosum_ATCC700975","Cbelfantii_FRC0043","Ccallunae_DSM20147","Ccamporealensis_DSM44610","Cdeserti_GIMN1010","Cdiphtheriae_NCTC11397","Cdoosanense_DSM45436","Cefficiens_YS314","Cepidermidicanis_DSM45586","Cfalsenii_DSM44353","Cglutamicum_ATCC13032","Cglycinophilum_AJ3170","Chalotolerans_YIM70093","Chumireducens_DSM45392","Cimitans_DSM44264","Cjeike…	0.115991	0.115991	1.70758	0.115991	0.115991	1.70758	258	0
ERS451417_00295	1717.62.peg.296	NA	NA	NA	1	39	Cargentoratense_DSM44202,"Catypicum_R2070","Caurimucosum_ATCC700975","Cbelfantii_FRC0043","Ccallunae_DSM20147","Ccamporealensis_DSM44610","Cdeserti_GIMN1010","Cdiphtheriae_NCTC11397","Cdoosanense_DSM45436","Cefficiens_YS314","Cepidermidicanis_DSM45586","Cfalsenii_DSM44353","Cglutamicum_ATCC13032","Cglycinophilum_AJ3170","Chalotolerans_YIM70093","Chumireducens_DSM45392","Cimitans_DSM44264","Cjeike…	0.152657	0.152657	1.6924	0.152657	0.152657	1.69241	258	0
ERS451417_01154	1717.62.peg.1165	NA	NA	NA	1	39	Cargentoratense_DSM44202,"Catypicum_R2070","Caurimucosum_ATCC700975","Cbelfantii_FRC0043","Ccallunae_DSM20147","Ccamporealensis_DSM44610","Cdeserti_GIMN1010","Cdiphtheriae_NCTC11397","Cdoosanense_DSM45436","Cefficiens_YS314","Cepidermidicanis_DSM45586","Cfalsenii_DSM44353","Cglutamicum_ATCC13032","Cglycinophilum_AJ3170","Chalotolerans_YIM70093","Chumireducens_DSM45392","Cimitans_DSM44264","Cjeike…	0.373524	0.13304	2.19009	0.249329	0.13304	2.19009	258	0
ERS451417_01169	1717.62.peg.1180	NA	NA	NA	1	39	Cargentoratense_DSM44202,"Catypicum_R2070","Caurimucosum_ATCC700975","Cbelfantii_FRC0043","Ccallunae_DSM20147","Ccamporealensis_DSM44610","Cdeserti_GIMN1010","Cdiphtheriae_NCTC11397","Cdoosanense_DSM45436","Cefficiens_YS314","Cepidermidicanis_DSM45586","Cfalsenii_DSM44353","Cglutamicum_ATCC13032","Cglycinophilum_AJ3170","Chalotolerans_YIM70093","Chumireducens_DSM45392","Cimitans_DSM44264","Cjeike…	0.184093	0.184093	1.51995	0.184093	0.184093	1.52005	2	1	1. 0.43906;2. 20;3. 58;4. 69;5. 69;6. 205;7. 101;8. 301;9. 49;10. D;11. GAC
ERS451417_00740	1717.62.peg.743	NA	NA	NA	1	34	Cargentoratense_DSM44202,"Catypicum_R2070","Caurimucosum_ATCC700975","Cbelfantii_FRC0043","Ccamporealensis_DSM44610","Cdeserti_GIMN1010","Cdiphtheriae_NCTC11397","Cdoosanense_DSM45436","Cefficiens_YS314","Cepidermidicanis_DSM45586","Cfalsenii_DSM44353","Cglutamicum_ATCC13032","Cglycinophilum_AJ3170","Chalotolerans_YIM70093","Chumireducens_DSM45392","Cimitans_DSM44264","Cjeikeium_K41","Clactis_RW2…	0.362849	0.362849	1.7506	0.362849	0.362849	1.7506	3074	2	1. 0.48103;2. 91;3. 271;4. 107;5. 107;6. 319;7. 235;8. 703;9. 34;10. D;11. GAC	1. 0.53935;2. 340;3. 1018;4. 365;5. 365;6. 1093;7. 510;8. 1528;9. 709;10. A;11. GCG
ERS451417_02004	1717.62.peg.2008	NA	NA	NA	1	7	Cbelfantii_FRC0043,"Cdiphtheriae_NCTC11397","Cpseudotuberculosis_31","Cpseudotuberculosis_ATCC19410","Csilvaticum_KL0182","Culcerans_NCTC12077","Culcerans_NCTC7910"	0.100403	0.100403	6.00845	0.100403	0.100403	6.00844	258	0
ERS451417_00804	1717.62.peg.811	NA	NA	NA	1	39	Cargentoratense_DSM44202,"Catypicum_R2070","Caurimucosum_ATCC700975","Cbelfantii_FRC0043","Ccallunae_DSM20147","Ccamporealensis_DSM44610","Cdeserti_GIMN1010","Cdiphtheriae_NCTC11397","Cdoosanense_DSM45436","Cefficiens_YS314","Cepidermidicanis_DSM45586","Cfalsenii_DSM44353","Cglutamicum_ATCC13032","Cglycinophilum_AJ3170","Chalotolerans_YIM70093","Chumireducens_DSM45392","Cimitans_DSM44264","Cjeike…	0.204195	0.204195	1.78089	0.204195	0.204195	1.78089	3074	1	1. 0.61807;2. 370;3. 1108;4. 401;5. 401;6. 1201;7. 484;8. 1450;9. 796;10. K;11. AAA
ERS451417_01843	1717.62.peg.1846	NA	NA	NA	1	25	Cargentoratense_DSM44202,"Caurimucosum_ATCC700975","Cbelfantii_FRC0043","Ccallunae_DSM20147","Ccamporealensis_DSM44610","Cdeserti_GIMN1010","Cdiphtheriae_NCTC11397","Cefficiens_YS314","Cepidermidicanis_DSM45586","Cglutamicum_ATCC13032","Chalotolerans_YIM70093","Chumireducens_DSM45392","Ckutscheri_DSM20755","Clactis_RW25","Cmarinum_DSM44953","Cmaris_DSM45190","Cmustelae_DSM45274","Cpseudotuberculo…	0.113898	0.113898	1.67464	0.113898	0.113898	1.67464	3330	0
ERS451417_00680	1717.62.peg.687	NA	NA	NA	1	39	Cargentoratense_DSM44202,"Catypicum_R2070","Caurimucosum_ATCC700975","Cbelfantii_FRC0043","Ccallunae_DSM20147","Ccamporealensis_DSM44610","Cdeserti_GIMN1010","Cdiphtheriae_NCTC11397","Cdoosanense_DSM45436","Cefficiens_YS314","Cepidermidicanis_DSM45586","Cfalsenii_DSM44353","Cglutamicum_ATCC13032","Cglycinophilum_AJ3170","Chalotolerans_YIM70093","Chumireducens_DSM45392","Cimitans_DSM44264","Cjeike…	0.0596073	0.0596073	1.62964	0.0596073	0.0596073	1.62964	2306	0
ERS451417_02262	1717.62.peg.2291	NA	NA	NA	1	38	Cargentoratense_DSM44202,"Catypicum_R2070","Caurimucosum_ATCC700975","Cbelfantii_FRC0043","Ccallunae_DSM20147","Ccamporealensis_DSM44610","Cdeserti_GIMN1010","Cdiphtheriae_NCTC11397","Cdoosanense_DSM45436","Cefficiens_YS314","Cepidermidicanis_DSM45586","Cfalsenii_DSM44353","Cglutamicum_ATCC13032","Cglycinophilum_AJ3170","Chalotolerans_YIM70093","Chumireducens_DSM45392","Cimitans_DSM44264","Cjeike…	0.160432	0.160432	1.71769	0.160432	0.160432	1.71769	2	1	1. 0.55755;2. 91;3. 271;4. 109;5. 109;6. 325;7. 126;8. 376;9. 178;10. A;11. GCG
ERS451417_00063	1717.62.peg.59	NA	NA	NA	1	12	Cbelfantii_FRC0043,"Cdiphtheriae_NCTC11397","Cefficiens_YS314","Cimitans_DSM44264","Crouxii_FRC0190","Csimulans_PES1","Csingulare_IBSB52218","Ctestudinoris_DSM44614","Culcerans_NCTC12077","Culcerans_NCTC7910","Cureicelerivorans_IMMIBRIV2301","Cuterequi_DSM45634"	0.195793	0.195793	2.62067	0.195793	0.195793	2.62067	3330	0
ERS451417_00241	1717.62.peg.236	NA	NA	NA	1	7	Cbelfantii_FRC0043,"Cdiphtheriae_NCTC11397","Cpseudotuberculosis_31","Cpseudotuberculosis_ATCC19410","Crouxii_FRC0190","Culcerans_NCTC12077","Culcerans_NCTC7910"	0.270506	0.270506	3.30139	0.270506	0.270506	3.30139	2	1	1. 0.60726;2. 75;3. 223;4. 129;5. 75;6. 223;7. 75;8. 223;9. 202;10. L;11. CTT
ERS451417_02309	1717.62.peg.2336	NA	NA	NA	1	31	Catypicum_R2070,"Caurimucosum_ATCC700975","Cbelfantii_FRC0043","Ccallunae_DSM20147","Ccamporealensis_DSM44610","Cdeserti_GIMN1010","Cdiphtheriae_NCTC11397","Cdoosanense_DSM45436","Cefficiens_YS314","Cepidermidicanis_DSM45586","Cglutamicum_ATCC13032","Cglycinophilum_AJ3170","Chalotolerans_YIM70093","Chumireducens_DSM45392","Ckutscheri_DSM20755","Cmarinum_DSM44953","Cmaris_DSM45190","Cmustelae_DSM4…	0.471882	0.471882	1.65752	0.471882	0.471882	1.65752	2306	0
ERS451417_02224	1717.62.peg.2249	NA	NA	NA	1	36	Cargentoratense_DSM44202,"Catypicum_R2070","Caurimucosum_ATCC700975","Cbelfantii_FRC0043","Ccallunae_DSM20147","Ccamporealensis_DSM44610","Cdeserti_GIMN1010","Cdiphtheriae_NCTC11397","Cdoosanense_DSM45436","Cefficiens_YS314","Cepidermidicanis_DSM45586","Cfalsenii_DSM44353","Cglutamicum_ATCC13032","Cglycinophilum_AJ3170","Chalotolerans_YIM70093","Chumireducens_DSM45392","Cimitans_DSM44264","Cjeike…	0.234081	0.234081	1.59561	0.234081	0.234081	1.59561	2	1	1. 0.48078;2. 211;3. 631;4. 239;5. 239;6. 715;7. 273;8. 817;9. 535;10. V;11. GTA
ERS451417_01659	1717.62.peg.1666	NA	NA	NA	1	10	Cbelfantii_FRC0043,"Cdiphtheriae_NCTC11397","Cefficiens_YS314","Ckutscheri_DSM20755","Cmustelae_DSM45274","Cpseudotuberculosis_31","Cpseudotuberculosis_ATCC19410","Csilvaticum_KL0182","Culcerans_NCTC12077","Culcerans_NCTC7910"	0.158385	0.158385	2.47034	0.18899	0.155764	2.48509	2	5	1. 0.49908;2. 144;3. 430;4. 168;5. 146;6. 436;7. 146;8. 436;9. 421;10. A;11. GCA	1. 0.54828;2. 190;3. 568;4. 233;5. 192;6. 574;7. 192;8. 574;9. 559;10. K;11. AAA	1. 0.51601;2. 196;3. 586;4. 239;5. 198;6. 592;7. 198;8. 592;9. 577;10. A;11. GCG	1. 0.51651;2. 265;3. 793;4. 330;5. 273;6. 817;7. 319;8. 955;9. 664;10. V;11. GTC	1. 0.45822;2. 270;3. 808;4. 335;5. 278;6. 832;7. 324;8. 970;9. 679;10. V;11. GTG
ERS451417_00505	1717.62.peg.509	NA	NA	NA	1	8	Cbelfantii_FRC0043,"Cdiphtheriae_NCTC11397","Cpseudotuberculosis_31","Cpseudotuberculosis_ATCC19410","Crouxii_FRC0190","Csilvaticum_KL0182","Culcerans_NCTC12077","Culcerans_NCTC7910"	0.0709624	0.0709624	3.73244	0.0709624	0.0709624	3.73244	2	1	1. 0.47224;2. 14;3. 40;4. 17;5. 14;6. 40;7. 14;8. 40;9. 40;10. I;11. ATC
ERS451417_00131	1717.62.peg.130	NA	NA	NA	1	8	Cbelfantii_FRC0043,"Cdiphtheriae_NCTC11397","Cpseudotuberculosis_31","Cpseudotuberculosis_ATCC19410","Crouxii_FRC0190","Csilvaticum_KL0182","Culcerans_NCTC12077","Culcerans_NCTC7910"	0.578907	0.330778	5.27949	0.578907	0.330778	5.27949	2	2	1. 0.55061;2. 109;3. 325;4. 172;5. 109;6. 325;7. 109;8. 325;9. 280;10. A;11. GCC	1. 0.82784;2. 131;3. 391;4. 195;5. 131;6. 391;7. 131;8. 391;9. 346;10. P;11. CCC
ERS451417_01678	1717.62.peg.1685	NA	NA	NA	1	6	Cbelfantii_FRC0043,"Cdiphtheriae_NCTC11397","Cpseudotuberculosis_31","Cpseudotuberculosis_ATCC19410","Culcerans_NCTC12077","Culcerans_NCTC7910"	0.101869	0.101869	2.03007	0.101869	0.101869	2.03007	2306	0
ERS451417_01055	1717.62.peg.1066	NA	NA	NA	1	39	Cargentoratense_DSM44202,"Catypicum_R2070","Caurimucosum_ATCC700975","Cbelfantii_FRC0043","Ccallunae_DSM20147","Ccamporealensis_DSM44610","Cdeserti_GIMN1010","Cdiphtheriae_NCTC11397","Cdoosanense_DSM45436","Cefficiens_YS314","Cepidermidicanis_DSM45586","Cfalsenii_DSM44353","Cglutamicum_ATCC13032","Cglycinophilum_AJ3170","Chalotolerans_YIM70093","Chumireducens_DSM45392","Cimitans_DSM44264","Cjeike…	0.142506	0.142506	1.8109	0.142506	0.142506	1.8109	258	0
ERS451417_00253	1717.62.peg.248	NA	NA	NA	1	9	Cargentoratense_DSM44202,"Cbelfantii_FRC0043","Cdiphtheriae_NCTC11397","Ckroppenstedtii_DSM44385","Cmustelae_DSM45274","Crouxii_FRC0190","Csilvaticum_KL0182","Culcerans_NCTC12077","Culcerans_NCTC7910"	0.087225	0.087225	2.06636	0.087225	0.087225	2.06636	2	1	1. 0.44329;2. 387;3. 1159;4. 443;5. 422;6. 1264;7. 453;8. 1357;9. 916;10. V;11. GTG
ERS451417_00496	1717.62.peg.499	NA	NA	NA	1	39	Cargentoratense_DSM44202,"Catypicum_R2070","Caurimucosum_ATCC700975","Cbelfantii_FRC0043","Ccallunae_DSM20147","Ccamporealensis_DSM44610","Cdeserti_GIMN1010","Cdiphtheriae_NCTC11397","Cdoosanense_DSM45436","Cefficiens_YS314","Cepidermidicanis_DSM45586","Cfalsenii_DSM44353","Cglutamicum_ATCC13032","Cglycinophilum_AJ3170","Chalotolerans_YIM70093","Chumireducens_DSM45392","Cimitans_DSM44264","Cjeike…	0.192375	0.192375	1.66788	0.192375	0.192375	1.66788	3330	0
ERS451417_00252	1717.62.peg.247	NA	NA	NA	1	10	Cargentoratense_DSM44202,"Cbelfantii_FRC0043","Cdiphtheriae_NCTC11397","Ckutscheri_DSM20755","Cmustelae_DSM45274","Cpseudotuberculosis_ATCC19410","Crouxii_FRC0190","Csilvaticum_KL0182","Culcerans_NCTC12077","Culcerans_NCTC7910"	0.0915182	0.0915182	2.29055	0.0915182	0.0915182	2.29055	3074	1	1. 0.56058;2. 70;3. 208;4. 95;5. 84;6. 250;7. 100;8. 298;9. 190;10. K;11. AAA
ERS451417_01731	1717.62.peg.1735	NA	NA	NA	1	26	Catypicum_R2070,"Caurimucosum_ATCC700975","Cbelfantii_FRC0043","Ccamporealensis_DSM44610","Cdiphtheriae_NCTC11397","Cdoosanense_DSM45436","Chalotolerans_YIM70093","Chumireducens_DSM45392","Cimitans_DSM44264","Ckutscheri_DSM20755","Clactis_RW25","Cmarinum_DSM44953","Cmaris_DSM45190","Cmustelae_DSM45274","Cpseudotuberculosis_31","Cpseudotuberculosis_ATCC19410","CriegeliiPUDD83A45","Csilvaticum_KL01…	0.196741	0.196741	1.73185	0.196741	0.196741	1.73185	258	0
ERS451417_00633	1717.62.peg.637	NA	NA	NA	1	39	Cargentoratense_DSM44202,"Catypicum_R2070","Caurimucosum_ATCC700975","Cbelfantii_FRC0043","Ccallunae_DSM20147","Ccamporealensis_DSM44610","Cdeserti_GIMN1010","Cdiphtheriae_NCTC11397","Cdoosanense_DSM45436","Cefficiens_YS314","Cepidermidicanis_DSM45586","Cfalsenii_DSM44353","Cglutamicum_ATCC13032","Cglycinophilum_AJ3170","Chalotolerans_YIM70093","Chumireducens_DSM45392","Cimitans_DSM44264","Cjeike…	0.392519	0.116902	1.60465	0.227447	0.116912	1.60465	3330	0
ERS451417_01205	1717.62.peg.1213	NA	NA	NA	1	8	Cbelfantii_FRC0043,"Cdiphtheriae_NCTC11397","Cpseudotuberculosis_31","Cpseudotuberculosis_ATCC19410","Crouxii_FRC0190","Culcerans_NCTC12077","Culcerans_NCTC7910","Cvitaeruminis_DSM20294"	0.111911	0.111911	2.5038	0.111911	0.111911	2.50381	258	0
ERS451417_00753	1717.62.peg.758	NA	NA	NA	1	39	Cargentoratense_DSM44202,"Catypicum_R2070","Caurimucosum_ATCC700975","Cbelfantii_FRC0043","Ccallunae_DSM20147","Ccamporealensis_DSM44610","Cdeserti_GIMN1010","Cdiphtheriae_NCTC11397","Cdoosanense_DSM45436","Cefficiens_YS314","Cepidermidicanis_DSM45586","Cfalsenii_DSM44353","Cglutamicum_ATCC13032","Cglycinophilum_AJ3170","Chalotolerans_YIM70093","Chumireducens_DSM45392","Cimitans_DSM44264","Cjeike…	0.396632	0.10568	2.60468	0.227364	0.10568	2.60468	258	0
ERS451417_00457	1717.62.peg.461	NA	NA	NA	1	39	Cargentoratense_DSM44202,"Catypicum_R2070","Caurimucosum_ATCC700975","Cbelfantii_FRC0043","Ccallunae_DSM20147","Ccamporealensis_DSM44610","Cdeserti_GIMN1010","Cdiphtheriae_NCTC11397","Cdoosanense_DSM45436","Cefficiens_YS314","Cepidermidicanis_DSM45586","Cfalsenii_DSM44353","Cglutamicum_ATCC13032","Cglycinophilum_AJ3170","Chalotolerans_YIM70093","Chumireducens_DSM45392","Cimitans_DSM44264","Cjeike…	0.202454	0.202454	1.97889	0.202454	0.202454	1.97889	258	0
ERS451417_00953	1717.62.peg.960	NA	NA	NA	1	39	Cargentoratense_DSM44202,"Catypicum_R2070","Caurimucosum_ATCC700975","Cbelfantii_FRC0043","Ccallunae_DSM20147","Ccamporealensis_DSM44610","Cdeserti_GIMN1010","Cdiphtheriae_NCTC11397","Cdoosanense_DSM45436","Cefficiens_YS314","Cepidermidicanis_DSM45586","Cfalsenii_DSM44353","Cglutamicum_ATCC13032","Cglycinophilum_AJ3170","Chalotolerans_YIM70093","Chumireducens_DSM45392","Cimitans_DSM44264","Cjeike…	0.174732	0.174732	1.76809	0.174732	0.174732	1.76809	258	0
ERS451417_01177	1717.62.peg.1186	NA	NA	NA	1	39	Cargentoratense_DSM44202,"Catypicum_R2070","Caurimucosum_ATCC700975","Cbelfantii_FRC0043","Ccallunae_DSM20147","Ccamporealensis_DSM44610","Cdeserti_GIMN1010","Cdiphtheriae_NCTC11397","Cdoosanense_DSM45436","Cefficiens_YS314","Cepidermidicanis_DSM45586","Cfalsenii_DSM44353","Cglutamicum_ATCC13032","Cglycinophilum_AJ3170","Chalotolerans_YIM70093","Chumireducens_DSM45392","Cimitans_DSM44264","Cjeike…	0.228173	0.228173	1.87053	0.228173	0.228173	1.87053	3330	0
ERS451417_00310	1717.62.peg.311	NA	NA	NA	1	39	Cargentoratense_DSM44202,"Catypicum_R2070","Caurimucosum_ATCC700975","Cbelfantii_FRC0043","Ccallunae_DSM20147","Ccamporealensis_DSM44610","Cdeserti_GIMN1010","Cdiphtheriae_NCTC11397","Cdoosanense_DSM45436","Cefficiens_YS314","Cepidermidicanis_DSM45586","Cfalsenii_DSM44353","Cglutamicum_ATCC13032","Cglycinophilum_AJ3170","Chalotolerans_YIM70093","Chumireducens_DSM45392","Cimitans_DSM44264","Cjeike…	0.167804	0.167804	1.95441	0.167804	0.167804	1.95441	1026	1	1. 0.57542;2. 336;3. 1006;4. 383;5. 383;6. 1147;7. 422;8. 1264;9. 865;10. V;11. GTG
ERS451417_00057	1717.62.peg.52	NA	NA	NA	1	6	Caurimucosum_ATCC700975,"Cbelfantii_FRC0043","Cdiphtheriae_NCTC11397","Csingulare_IBSB52218","Culcerans_NCTC12077","Culcerans_NCTC7910"	0.316413	0.316413	5.71541	0.316413	0.316413	5.71539	258	0
ERS451417_02203	1717.62.peg.2229	NA	NA	NA	1	21	Catypicum_R2070,"Caurimucosum_ATCC700975","Cbelfantii_FRC0043","Ccallunae_DSM20147","Ccamporealensis_DSM44610","Cdeserti_GIMN1010","Cdiphtheriae_NCTC11397","Cdoosanense_DSM45436","Cepidermidicanis_DSM45586","Cglutamicum_ATCC13032","Chalotolerans_YIM70093","Ckutscheri_DSM20755","Cmaris_DSM45190","Cpseudotuberculosis_31","Cpseudotuberculosis_ATCC19410","Csilvaticum_KL0182","Csimulans_PES1","Csingul…	0.111494	0.111494	2.00442	0.111494	0.111494	2.00442	258	0
ERS451417_01706	1717.62.peg.1711	NA	NA	NA	1	22	Catypicum_R2070,"Caurimucosum_ATCC700975","Cbelfantii_FRC0043","Ccallunae_DSM20147","Cdeserti_GIMN1010","Cdiphtheriae_NCTC11397","Cefficiens_YS314","Cglutamicum_ATCC13032","Chalotolerans_YIM70093","Chumireducens_DSM45392","Cimitans_DSM44264","Ckroppenstedtii_DSM44385","Cmarinum_DSM44953","Cpseudotuberculosis_31","Cpseudotuberculosis_ATCC19410","Csilvaticum_KL0182","Csimulans_PES1","Csingulare_IBS…	0.116425	0.116425	1.89754	0.116425	0.116425	1.89755	258	0
ERS451417_01014	1717.62.peg.1025	NA	NA	NA	1	38	Cargentoratense_DSM44202,"Catypicum_R2070","Caurimucosum_ATCC700975","Cbelfantii_FRC0043","Ccallunae_DSM20147","Ccamporealensis_DSM44610","Cdeserti_GIMN1010","Cdiphtheriae_NCTC11397","Cdoosanense_DSM45436","Cefficiens_YS314","Cepidermidicanis_DSM45586","Cfalsenii_DSM44353","Cglutamicum_ATCC13032","Cglycinophilum_AJ3170","Chalotolerans_YIM70093","Chumireducens_DSM45392","Cimitans_DSM44264","Cjeike…	0.207061	0.207061	1.80388	0.207061	0.207061	1.80388	2	1	1. 0.5917;2. 417;3. 1249;4. 459;5. 459;6. 1375;7. 475;8. 1423;9. 964;10. V;11. GTC
ERS451417_01323	1717.62.peg.1331	NA	NA	NA	1	37	Cargentoratense_DSM44202,"Caurimucosum_ATCC700975","Cbelfantii_FRC0043","Ccallunae_DSM20147","Ccamporealensis_DSM44610","Cdeserti_GIMN1010","Cdiphtheriae_NCTC11397","Cdoosanense_DSM45436","Cefficiens_YS314","Cepidermidicanis_DSM45586","Cfalsenii_DSM44353","Cglutamicum_ATCC13032","Cglycinophilum_AJ3170","Chalotolerans_YIM70093","Chumireducens_DSM45392","Cimitans_DSM44264","Cjeikeium_K41","Ckroppen…	0.289355	0.289355	1.51096	0.289355	0.289355	1.51096	3330	0
ERS451417_02143	1717.62.peg.2165	NA	NA	NA	1	38	Cargentoratense_DSM44202,"Catypicum_R2070","Caurimucosum_ATCC700975","Cbelfantii_FRC0043","Ccallunae_DSM20147","Ccamporealensis_DSM44610","Cdeserti_GIMN1010","Cdiphtheriae_NCTC11397","Cdoosanense_DSM45436","Cefficiens_YS314","Cepidermidicanis_DSM45586","Cfalsenii_DSM44353","Cglutamicum_ATCC13032","Cglycinophilum_AJ3170","Chalotolerans_YIM70093","Chumireducens_DSM45392","Cimitans_DSM44264","Cjeike…	0.115098	0.115098	1.55941	0.115098	0.115098	1.55941	3074	1	1. 0.60613;2. 360;3. 1078;4. 410;5. 410;6. 1228;7. 507;8. 1519;9. 826;10. S;11. AGT
ERS451417_01784	1717.62.peg.1789	NA	NA	NA	1	26	Catypicum_R2070,"Caurimucosum_ATCC700975","Cbelfantii_FRC0043","Ccallunae_DSM20147","Ccamporealensis_DSM44610","Cdeserti_GIMN1010","Cdiphtheriae_NCTC11397","Cdoosanense_DSM45436","Cefficiens_YS314","Cglutamicum_ATCC13032","Chalotolerans_YIM70093","Chumireducens_DSM45392","Cimitans_DSM44264","Ckutscheri_DSM20755","Cmarinum_DSM44953","Cmaris_DSM45190","Cpseudotuberculosis_31","Cpseudotuberculosis_A…	0.121961	0.121961	1.88083	0.121961	0.121961	1.88083	3330	0
ERS451417_00632	1717.62.peg.636	NA	NA	NA	1	9	Cbelfantii_FRC0043,"Cdiphtheriae_NCTC11397","Cpseudotuberculosis_31","Cpseudotuberculosis_ATCC19410","Crouxii_FRC0190","Csilvaticum_KL0182","Culcerans_NCTC12077","Culcerans_NCTC7910","Cvitaeruminis_DSM20294"	0.112459	0.112459	2.7809	0.112459	0.112459	2.7809	258	0
ERS451417_01373	1717.62.peg.1382	NA	NA	NA	1	38	Cargentoratense_DSM44202,"Catypicum_R2070","Caurimucosum_ATCC700975","Cbelfantii_FRC0043","Ccallunae_DSM20147","Ccamporealensis_DSM44610","Cdeserti_GIMN1010","Cdiphtheriae_NCTC11397","Cdoosanense_DSM45436","Cefficiens_YS314","Cepidermidicanis_DSM45586","Cfalsenii_DSM44353","Cglutamicum_ATCC13032","Cglycinophilum_AJ3170","Chalotolerans_YIM70093","Chumireducens_DSM45392","Cimitans_DSM44264","Cjeike…	0.116124	0.116124	1.9555	0.116124	0.116124	1.95549	1282	0
ERS451417_00966	1717.62.peg.974	NA	NA	NA	1	17	Cargentoratense_DSM44202,"Cbelfantii_FRC0043","Cdiphtheriae_NCTC11397","Cefficiens_YS314","Cepidermidicanis_DSM45586","Cglutamicum_ATCC13032","Ckroppenstedtii_DSM44385","Ckutscheri_DSM20755","Clactis_RW25","Cmustelae_DSM45274","Cpseudotuberculosis_31","Cpseudotuberculosis_ATCC19410","Crouxii_FRC0190","Csilvaticum_KL0182","Culcerans_NCTC12077","Culcerans_NCTC7910","Cvitaeruminis_DSM20294"	0.171036	0.171036	2.51283	0.171036	0.171036	2.51283	258	0
ERS451417_00040	1717.62.peg.36	NA	NA	NA	1	14	Caurimucosum_ATCC700975,"Cbelfantii_FRC0043","Cdiphtheriae_NCTC11397","Cepidermidicanis_DSM45586","Cfalsenii_DSM44353","Cjeikeium_K41","CriegeliiPUDD83A45","Crouxii_FRC0190","Csimulans_PES1","Csingulare_IBSB52218","Culcerans_NCTC12077","Culcerans_NCTC7910","Cureicelerivorans_IMMIBRIV2301","Cvitaeruminis_DSM20294"	1	0.250895	2.30058	1	0.250895	2.30058	3072	4	1. 0.83082;2. 37;3. 109;4. 276;5. 58;6. 172;7. 64;8. 190;9. 91;10. I;11. ATC	1. 0.85296;2. 46;3. 136;4. 285;5. 67;6. 199;7. 73;8. 217;9. 118;10. C;11. TGC	1. 0.7872;2. 64;3. 190;4. 303;5. 85;6. 253;7. 91;8. 271;9. 172;10. R;11. CGC	1. 0.90236;2. 166;3. 496;4. 415;5. 196;6. 586;7. 223;8. 667;9. 367;10. V;11. GTG
ERS451417_02171	1717.62.peg.2197	NA	NA	NA	1	8	Cbelfantii_FRC0043,"Cdiphtheriae_NCTC11397","Ckutscheri_DSM20755","Cpseudotuberculosis_31","Cpseudotuberculosis_ATCC19410","Csilvaticum_KL0182","Culcerans_NCTC12077","Culcerans_NCTC7910"	0.0904623	0.0904623	1.66305	0.0904623	0.0904623	1.66306	258	0
ERS451417_00086	1717.62.peg.83	NA	NA	NA	1	26	Cbelfantii_FRC0043,"Ccallunae_DSM20147","Ccamporealensis_DSM44610","Cdeserti_GIMN1010","Cdiphtheriae_NCTC11397","Cefficiens_YS314","Cepidermidicanis_DSM45586","Cfalsenii_DSM44353","Cglutamicum_ATCC13032","Cglycinophilum_AJ3170","Chalotolerans_YIM70093","Chumireducens_DSM45392","Cjeikeium_K41","Ckroppenstedtii_DSM44385","Clactis_RW25","Cmarinum_DSM44953","Cmaris_DSM45190","Cpseudotuberculosis_31",…	0.148758	0.143359	1.55064	0.148748	0.143359	1.55063	2	1	1. 0.63563;2. 205;3. 613;4. 223;5. 223;6. 667;7. 238;8. 712;9. 496;10. D;11. GAT
ERS451417_02386	1717.62.peg.2418	NA	NA	NA	1	38	Cargentoratense_DSM44202,"Catypicum_R2070","Caurimucosum_ATCC700975","Cbelfantii_FRC0043","Ccallunae_DSM20147","Ccamporealensis_DSM44610","Cdeserti_GIMN1010","Cdiphtheriae_NCTC11397","Cdoosanense_DSM45436","Cefficiens_YS314","Cepidermidicanis_DSM45586","Cfalsenii_DSM44353","Cglutamicum_ATCC13032","Cglycinophilum_AJ3170","Chalotolerans_YIM70093","Chumireducens_DSM45392","Cimitans_DSM44264","Cjeike…	0.188993	0.188993	1.58683	0.188993	0.188993	1.58683	1282	0
ERS451417_01367	1717.62.peg.1376	NA	NA	NA	1	38	Cargentoratense_DSM44202,"Catypicum_R2070","Caurimucosum_ATCC700975","Cbelfantii_FRC0043","Ccallunae_DSM20147","Ccamporealensis_DSM44610","Cdeserti_GIMN1010","Cdiphtheriae_NCTC11397","Cdoosanense_DSM45436","Cefficiens_YS314","Cepidermidicanis_DSM45586","Cfalsenii_DSM44353","Cglutamicum_ATCC13032","Cglycinophilum_AJ3170","Chalotolerans_YIM70093","Chumireducens_DSM45392","Cimitans_DSM44264","Cjeike…	0.0878619	0.0878619	1.65246	0.0878619	0.0878619	1.65246	258	0
ERS451417_01517	1717.62.peg.1525	NA	NA	NA	1	38	Cargentoratense_DSM44202,"Catypicum_R2070","Caurimucosum_ATCC700975","Cbelfantii_FRC0043","Ccallunae_DSM20147","Ccamporealensis_DSM44610","Cdeserti_GIMN1010","Cdiphtheriae_NCTC11397","Cdoosanense_DSM45436","Cefficiens_YS314","Cepidermidicanis_DSM45586","Cfalsenii_DSM44353","Cglutamicum_ATCC13032","Cglycinophilum_AJ3170","Chalotolerans_YIM70093","Chumireducens_DSM45392","Cimitans_DSM44264","Cjeike…	0.224165	0.224165	1.70277	0.224165	0.224165	1.70277	258	0
ERS451417_01665	1717.62.peg.1672	NA	NA	NA	1	38	Cargentoratense_DSM44202,"Catypicum_R2070","Caurimucosum_ATCC700975","Cbelfantii_FRC0043","Ccallunae_DSM20147","Ccamporealensis_DSM44610","Cdeserti_GIMN1010","Cdiphtheriae_NCTC11397","Cdoosanense_DSM45436","Cefficiens_YS314","Cepidermidicanis_DSM45586","Cfalsenii_DSM44353","Cglutamicum_ATCC13032","Cglycinophilum_AJ3170","Chalotolerans_YIM70093","Chumireducens_DSM45392","Cimitans_DSM44264","Cjeike…	0.106786	0.106786	1.8165	0.106786	0.106786	1.81649	258	0
ERS451417_01196	1717.62.peg.1205	NA	NA	NA	1	12	Caurimucosum_ATCC700975,"Ccamporealensis_DSM44610","Cdiphtheriae_NCTC11397","Cepidermidicanis_DSM45586","Cpseudotuberculosis_31","Cpseudotuberculosis_ATCC19410","Crouxii_FRC0190","Csilvaticum_KL0182","Csimulans_PES1","Csingulare_IBSB52218","Culcerans_NCTC12077","Culcerans_NCTC7910"	0.114294	0.114294	2.8649	0.114294	0.114294	2.86489	258	0
ERS451417_01504	1717.62.peg.1512	NA	NA	NA	1	38	Cargentoratense_DSM44202,"Catypicum_R2070","Caurimucosum_ATCC700975","Cbelfantii_FRC0043","Ccallunae_DSM20147","Ccamporealensis_DSM44610","Cdeserti_GIMN1010","Cdiphtheriae_NCTC11397","Cdoosanense_DSM45436","Cefficiens_YS314","Cepidermidicanis_DSM45586","Cfalsenii_DSM44353","Cglutamicum_ATCC13032","Cglycinophilum_AJ3170","Chalotolerans_YIM70093","Chumireducens_DSM45392","Cimitans_DSM44264","Cjeike…	0.170212	0.170212	1.75972	0.170212	0.170212	1.75972	258	0
ERS451417_01995	1717.62.peg.1998	NA	NA	NA	1	38	Cargentoratense_DSM44202,"Catypicum_R2070","Caurimucosum_ATCC700975","Cbelfantii_FRC0043","Ccallunae_DSM20147","Ccamporealensis_DSM44610","Cdeserti_GIMN1010","Cdiphtheriae_NCTC11397","Cdoosanense_DSM45436","Cefficiens_YS314","Cepidermidicanis_DSM45586","Cfalsenii_DSM44353","Cglutamicum_ATCC13032","Cglycinophilum_AJ3170","Chalotolerans_YIM70093","Chumireducens_DSM45392","Cimitans_DSM44264","Cjeike…	0.110589	0.110589	1.98756	0.110589	0.110589	1.98756	3330	0
ERS451417_01216	1717.62.peg.1224	NA	NA	NA	1	39	Cargentoratense_DSM44202,"Catypicum_R2070","Caurimucosum_ATCC700975","Cbelfantii_FRC0043","Ccallunae_DSM20147","Ccamporealensis_DSM44610","Cdeserti_GIMN1010","Cdiphtheriae_NCTC11397","Cdoosanense_DSM45436","Cefficiens_YS314","Cepidermidicanis_DSM45586","Cfalsenii_DSM44353","Cglutamicum_ATCC13032","Cglycinophilum_AJ3170","Chalotolerans_YIM70093","Chumireducens_DSM45392","Cimitans_DSM44264","Cjeike…	0.214116	0.214116	1.79625	0.214116	0.214116	1.79625	1282	0
ERS451417_02265	1717.62.peg.2294	NA	NA	NA	1	36	Cargentoratense_DSM44202,"Catypicum_R2070","Caurimucosum_ATCC700975","Cbelfantii_FRC0043","Ccallunae_DSM20147","Ccamporealensis_DSM44610","Cdeserti_GIMN1010","Cdiphtheriae_NCTC11397","Cdoosanense_DSM45436","Cefficiens_YS314","Cepidermidicanis_DSM45586","Cfalsenii_DSM44353","Cglutamicum_ATCC13032","Cglycinophilum_AJ3170","Chalotolerans_YIM70093","Chumireducens_DSM45392","Cimitans_DSM44264","Cjeike…	0.0950071	0.0950071	1.24404	0.0950071	0.0950071	1.24404	258	0
ERS451417_00006	1717.62.peg.7	NA	NA	NA	1	16	Cbelfantii_FRC0043,"Ccamporealensis_DSM44610","Cdiphtheriae_NCTC11397","Chalotolerans_YIM70093","Chumireducens_DSM45392","Ckutscheri_DSM20755","Cmaris_DSM45190","Cpseudotuberculosis_31","Cpseudotuberculosis_ATCC19410","Crouxii_FRC0190","Csilvaticum_KL0182","Csimulans_PES1","Ctestudinoris_DSM44614","Culcerans_NCTC12077","Culcerans_NCTC7910","Cvitaeruminis_DSM20294"	0.203062	0.148787	1.92479	0.203062	0.148787	1.92479	2	1	1. 0.75996;2. 65;3. 193;4. 116;5. 77;6. 229;7. 77;8. 229;9. 148;10. V;11. GTC
ERS451417_01809	1717.62.peg.1815	NA	NA	NA	1	38	Cargentoratense_DSM44202,"Catypicum_R2070","Caurimucosum_ATCC700975","Cbelfantii_FRC0043","Ccallunae_DSM20147","Ccamporealensis_DSM44610","Cdeserti_GIMN1010","Cdiphtheriae_NCTC11397","Cdoosanense_DSM45436","Cefficiens_YS314","Cepidermidicanis_DSM45586","Cfalsenii_DSM44353","Cglutamicum_ATCC13032","Cglycinophilum_AJ3170","Chalotolerans_YIM70093","Chumireducens_DSM45392","Cimitans_DSM44264","Cjeike…	0.241448	0.241448	1.5767	0.241448	0.241448	1.5767	1282	0
ERS451417_00008	1717.62.peg.9	NA	NA	NA	1	28	Cargentoratense_DSM44202,"Catypicum_R2070","Caurimucosum_ATCC700975","Cbelfantii_FRC0043","Ccallunae_DSM20147","Cdeserti_GIMN1010","Cdiphtheriae_NCTC11397","Cdoosanense_DSM45436","Cefficiens_YS314","Cepidermidicanis_DSM45586","Chalotolerans_YIM70093","Chumireducens_DSM45392","Cimitans_DSM44264","Ckroppenstedtii_DSM44385","Ckutscheri_DSM20755","Cmarinum_DSM44953","Cmaris_DSM45190","Cpseudotubercul…	0.201803	0.201803	1.64759	0.201803	0.201803	1.64759	258	0
ERS451417_00917	1717.62.peg.924	NA	NA	NA	1	18	Catypicum_R2070,"Cbelfantii_FRC0043","Ccamporealensis_DSM44610","Cdiphtheriae_NCTC11397","Cepidermidicanis_DSM45586","Cfalsenii_DSM44353","Cglycinophilum_AJ3170","Cjeikeium_K41","Ckroppenstedtii_DSM44385","Cpseudotuberculosis_31","Cpseudotuberculosis_ATCC19410","Crouxii_FRC0190","Csilvaticum_KL0182","Csimulans_PES1","Culcerans_NCTC12077","Culcerans_NCTC7910","Cuterequi_DSM45634","Cvitaeruminis_DS…	0.172417	0.172417	1.71215	0.172417	0.172417	1.71215	2306	0
ERS451417_01166	1717.62.peg.1177	NA	NA	NA	1	39	Cargentoratense_DSM44202,"Catypicum_R2070","Caurimucosum_ATCC700975","Cbelfantii_FRC0043","Ccallunae_DSM20147","Ccamporealensis_DSM44610","Cdeserti_GIMN1010","Cdiphtheriae_NCTC11397","Cdoosanense_DSM45436","Cefficiens_YS314","Cepidermidicanis_DSM45586","Cfalsenii_DSM44353","Cglutamicum_ATCC13032","Cglycinophilum_AJ3170","Chalotolerans_YIM70093","Chumireducens_DSM45392","Cimitans_DSM44264","Cjeike…	0.104388	0.104388	1.84297	0.104388	0.104388	1.84296	258	0
ERS451417_01353	1717.62.peg.1361	NA	NA	NA	1	38	Cargentoratense_DSM44202,"Catypicum_R2070","Caurimucosum_ATCC700975","Cbelfantii_FRC0043","Ccallunae_DSM20147","Ccamporealensis_DSM44610","Cdeserti_GIMN1010","Cdiphtheriae_NCTC11397","Cdoosanense_DSM45436","Cefficiens_YS314","Cepidermidicanis_DSM45586","Cfalsenii_DSM44353","Cglutamicum_ATCC13032","Cglycinophilum_AJ3170","Chalotolerans_YIM70093","Chumireducens_DSM45392","Cimitans_DSM44264","Cjeike…	0.127805	0.127805	1.89659	0.127805	0.127805	1.89659	2	1	1. 0.64773;2. 446;3. 1336;4. 453;5. 453;6. 1357;7. 458;8. 1372;9. 1243;10. H;11. CAT
ERS451417_01578	1717.62.peg.1587	NA	NA	NA	1	18	Cbelfantii_FRC0043,"Ccallunae_DSM20147","Cdeserti_GIMN1010","Cdiphtheriae_NCTC11397","Cdoosanense_DSM45436","Cefficiens_YS314","Cepidermidicanis_DSM45586","Cglutamicum_ATCC13032","Chumireducens_DSM45392","Cmarinum_DSM44953","Cmaris_DSM45190","Cmustelae_DSM45274","Cpseudotuberculosis_ATCC19410","Csilvaticum_KL0182","Ctestudinoris_DSM44614","Culcerans_NCTC12077","Culcerans_NCTC7910","Cvitaeruminis_…	0.150607	0.117226	1.59669	0.150607	0.117226	1.59669	2050	2	1. 0.71714;2. 47;3. 139;4. 97;5. 54;6. 160;7. 66;8. 196;9. 103;10. A;11. GCG	1. 0.64069;2. 139;3. 415;4. 197;5. 149;6. 445;7. 162;8. 484;9. 289;10. P;11. CCT
ERS451417_01000	1717.62.peg.1011	NA	NA	NA	1	24	Cbelfantii_FRC0043,"Ccallunae_DSM20147","Cdeserti_GIMN1010","Cdiphtheriae_NCTC11397","Cdoosanense_DSM45436","Cefficiens_YS314","Cglutamicum_ATCC13032","Cglycinophilum_AJ3170","Chalotolerans_YIM70093","Chumireducens_DSM45392","Ckroppenstedtii_DSM44385","Clactis_RW25","Cmarinum_DSM44953","Cmaris_DSM45190","Cpseudotuberculosis_31","Cpseudotuberculosis_ATCC19410","Crouxii_FRC0190","Csilvaticum_KL0182…	0.148208	0.148208	1.65394	0.148208	0.148208	1.65394	258	0
ERS451417_01160	1717.62.peg.1171	NA	NA	NA	1	37	Cargentoratense_DSM44202,"Caurimucosum_ATCC700975","Cbelfantii_FRC0043","Ccallunae_DSM20147","Ccamporealensis_DSM44610","Cdeserti_GIMN1010","Cdiphtheriae_NCTC11397","Cdoosanense_DSM45436","Cefficiens_YS314","Cepidermidicanis_DSM45586","Cfalsenii_DSM44353","Cglutamicum_ATCC13032","Cglycinophilum_AJ3170","Chalotolerans_YIM70093","Chumireducens_DSM45392","Cimitans_DSM44264","Cjeikeium_K41","Ckroppen…	0.186392	0.186392	1.64759	0.186392	0.186392	1.64759	3074	2	1. 0.55137;2. 41;3. 121;4. 68;5. 68;6. 202;7. 89;8. 265;9. 88;10. A;11. GCG	1. 0.48416;2. 341;3. 1021;4. 399;5. 399;6. 1195;7. 453;8. 1357;9. 769;10. T;11. ACT
ERS451417_00717	1717.62.peg.722	NA	NA	NA	1	12	Cargentoratense_DSM44202,"Cbelfantii_FRC0043","Cdiphtheriae_NCTC11397","Cepidermidicanis_DSM45586","Ckutscheri_DSM20755","Cmustelae_DSM45274","Cpseudotuberculosis_31","Crouxii_FRC0190","Csilvaticum_KL0182","Culcerans_NCTC12077","Culcerans_NCTC7910","Cvitaeruminis_DSM20294"	0.236828	0.209341	2.34963	0.236828	0.209341	2.34963	2050	2	1. 0.56398;2. 54;3. 160;4. 98;5. 78;6. 232;7. 119;8. 355;9. 94;10. V;11. GTG	1. 0.54864;2. 136;3. 406;4. 184;5. 164;6. 490;7. 212;8. 634;9. 304;10. V;11. GTG
ERS451417_00388	1717.62.peg.388	NA	NA	NA	1	18	Cbelfantii_FRC0043,"Cdiphtheriae_NCTC11397","Cepidermidicanis_DSM45586","Chumireducens_DSM45392","Ckutscheri_DSM20755","Clactis_RW25","Cmarinum_DSM44953","Cmustelae_DSM45274","Cpseudotuberculosis_31","Cpseudotuberculosis_ATCC19410","Crouxii_FRC0190","Csilvaticum_KL0182","Csimulans_PES1","Ctestudinoris_DSM44614","Culcerans_NCTC12077","Culcerans_NCTC7910","Curealyticum_DSM7109","Cvitaeruminis_DSM20…	0.141448	0.141448	1.78785	0.141457	0.141457	1.78784	2	2	1. 0.57081;2. 199;3. 595;4. 323;5. 273;6. 817;7. 330;8. 988;9. 559;10. P;11. CCT	1. 0.53548;2. 345;3. 1033;4. 479;5. 419;6. 1255;7. 478;8. 1432;9. 967;10. D;11. GAT
ERS451417_00217	1717.62.peg.214	NA	NA	NA	1	11	Cbelfantii_FRC0043,"Cdiphtheriae_NCTC11397","Ckutscheri_DSM20755","Cmustelae_DSM45274","Cpseudotuberculosis_31","Cpseudotuberculosis_ATCC19410","Crouxii_FRC0190","Csilvaticum_KL0182","Culcerans_NCTC12077","Culcerans_NCTC7910","Cvitaeruminis_DSM20294"	0.148503	0.148503	2.1264	0.148503	0.148503	2.1264	258	0
ERS451417_01419	1717.62.peg.1425	NA	NA	NA	1	17	Cbelfantii_FRC0043,"Ccallunae_DSM20147","Cdeserti_GIMN1010","Cdiphtheriae_NCTC11397","Cdoosanense_DSM45436","Cefficiens_YS314","Cglutamicum_ATCC13032","Chalotolerans_YIM70093","Chumireducens_DSM45392","Cmarinum_DSM44953","Cmaris_DSM45190","Cpseudotuberculosis_31","Cpseudotuberculosis_ATCC19410","Csilvaticum_KL0182","Ctestudinoris_DSM44614","Culcerans_NCTC12077","Culcerans_NCTC7910"	0.301418	0.301418	1.72389	0.301418	0.301418	1.72389	258	0
ERS451417_00195	1717.62.peg.192	NA	NA	NA	1	32	Cargentoratense_DSM44202,"Catypicum_R2070","Caurimucosum_ATCC700975","Cbelfantii_FRC0043","Ccallunae_DSM20147","Ccamporealensis_DSM44610","Cdeserti_GIMN1010","Cdiphtheriae_NCTC11397","Cefficiens_YS314","Cepidermidicanis_DSM45586","Cfalsenii_DSM44353","Cglutamicum_ATCC13032","Cglycinophilum_AJ3170","Chumireducens_DSM45392","Cjeikeium_K41","Ckutscheri_DSM20755","Clactis_RW25","Cmarinum_DSM44953","C…	0.288669	0.288669	1.73188	0.28866	0.28866	1.73188	3330	0
ERS451417_00262	1717.62.peg.256	NA	NA	NA	1	39	Cargentoratense_DSM44202,"Catypicum_R2070","Caurimucosum_ATCC700975","Cbelfantii_FRC0043","Ccallunae_DSM20147","Ccamporealensis_DSM44610","Cdeserti_GIMN1010","Cdiphtheriae_NCTC11397","Cdoosanense_DSM45436","Cefficiens_YS314","Cepidermidicanis_DSM45586","Cfalsenii_DSM44353","Cglutamicum_ATCC13032","Cglycinophilum_AJ3170","Chalotolerans_YIM70093","Chumireducens_DSM45392","Cimitans_DSM44264","Cjeike…	0.167902	0.167902	2.26493	0.167902	0.167902	2.26494	2306	0
ERS451417_00069	1717.62.peg.65	NA	NA	NA	1	23	Cargentoratense_DSM44202,"Cbelfantii_FRC0043","Ccallunae_DSM20147","Cdiphtheriae_NCTC11397","Cdoosanense_DSM45436","Cefficiens_YS314","Cfalsenii_DSM44353","Chalotolerans_YIM70093","Chumireducens_DSM45392","Ckroppenstedtii_DSM44385","Ckutscheri_DSM20755","Clactis_RW25","Cmarinum_DSM44953","Cmaris_DSM45190","Cmustelae_DSM45274","Cpseudotuberculosis_31","Cpseudotuberculosis_ATCC19410","Crouxii_FRC01…	0.297792	0.297792	1.66965	0.297792	0.297792	1.66965	3330	0
ERS451417_00858	1717.62.peg.863	NA	NA	NA	1	35	Cargentoratense_DSM44202,"Catypicum_R2070","Caurimucosum_ATCC700975","Cbelfantii_FRC0043","Ccallunae_DSM20147","Ccamporealensis_DSM44610","Cdeserti_GIMN1010","Cdiphtheriae_NCTC11397","Cdoosanense_DSM45436","Cefficiens_YS314","Cepidermidicanis_DSM45586","Cfalsenii_DSM44353","Cglutamicum_ATCC13032","Chalotolerans_YIM70093","Chumireducens_DSM45392","Cimitans_DSM44264","Ckroppenstedtii_DSM44385","Cku…	0.0884933	0.0884933	1.60867	0.0884933	0.0884933	1.60867	258	0
ERS451417_00073	1717.62.peg.70	NA	NA	NA	1	16	Caurimucosum_ATCC700975,"Cbelfantii_FRC0043","Cdiphtheriae_NCTC11397","Cepidermidicanis_DSM45586","Cjeikeium_K41","Ckutscheri_DSM20755","Clactis_RW25","Cmustelae_DSM45274","Cpseudotuberculosis_31","Cpseudotuberculosis_ATCC19410","CriegeliiPUDD83A45","Crouxii_FRC0190","Csilvaticum_KL0182","Culcerans_NCTC12077","Culcerans_NCTC7910","Cvitaeruminis_DSM20294"	0.282344	0.282344	3.33248	0.282344	0.282344	3.33246	2306	0
ERS451417_01253	1717.62.peg.1261	NA	NA	NA	1	31	Catypicum_R2070,"Caurimucosum_ATCC700975","Cbelfantii_FRC0043","Ccamporealensis_DSM44610","Cdiphtheriae_NCTC11397","Cdoosanense_DSM45436","Cepidermidicanis_DSM45586","Cfalsenii_DSM44353","Chalotolerans_YIM70093","Chumireducens_DSM45392","Cimitans_DSM44264","Cjeikeium_K41","Ckroppenstedtii_DSM44385","Ckutscheri_DSM20755","Cmarinum_DSM44953","Cmaris_DSM45190","Cmustelae_DSM45274","Cpseudotuberculos…	0.205432	0.205432	1.65521	0.205432	0.205432	1.65521	258	0
ERS451417_01043	1717.62.peg.1053	NA	NA	NA	1	39	Cargentoratense_DSM44202,"Catypicum_R2070","Caurimucosum_ATCC700975","Cbelfantii_FRC0043","Ccallunae_DSM20147","Ccamporealensis_DSM44610","Cdeserti_GIMN1010","Cdiphtheriae_NCTC11397","Cdoosanense_DSM45436","Cefficiens_YS314","Cepidermidicanis_DSM45586","Cfalsenii_DSM44353","Cglutamicum_ATCC13032","Cglycinophilum_AJ3170","Chalotolerans_YIM70093","Chumireducens_DSM45392","Cimitans_DSM44264","Cjeike…	0.147755	0.147755	1.47934	0.147755	0.147755	1.47934	258	0
ERS451417_00317	1717.62.peg.319	NA	NA	NA	1	39	Cargentoratense_DSM44202,"Catypicum_R2070","Caurimucosum_ATCC700975","Cbelfantii_FRC0043","Ccallunae_DSM20147","Ccamporealensis_DSM44610","Cdeserti_GIMN1010","Cdiphtheriae_NCTC11397","Cdoosanense_DSM45436","Cefficiens_YS314","Cepidermidicanis_DSM45586","Cfalsenii_DSM44353","Cglutamicum_ATCC13032","Cglycinophilum_AJ3170","Chalotolerans_YIM70093","Chumireducens_DSM45392","Cimitans_DSM44264","Cjeike…	0.174083	0.174083	1.5986	0.174083	0.174083	1.5986	3330	0
ERS451417_00328	1717.62.peg.330	NA	NA	NA	1	23	Cbelfantii_FRC0043,"Ccallunae_DSM20147","Cdeserti_GIMN1010","Cdiphtheriae_NCTC11397","Cdoosanense_DSM45436","Cefficiens_YS314","Cepidermidicanis_DSM45586","Cglutamicum_ATCC13032","Chalotolerans_YIM70093","Chumireducens_DSM45392","Cimitans_DSM44264","Ckutscheri_DSM20755","Cmarinum_DSM44953","Cmustelae_DSM45274","Cpseudotuberculosis_31","Cpseudotuberculosis_ATCC19410","Crouxii_FRC0190","Csilvaticum…	0.194566	0.194566	1.58283	0.194566	0.194566	1.58283	3074	1	1. 0.6141;2. 593;3. 1777;4. 726;5. 681;6. 2041;7. 916;8. 2746;9. 1216;10. D;11. GAC
ERS451417_02124	1717.62.peg.2139	NA	NA	NA	1	7	Cbelfantii_FRC0043,"Cdiphtheriae_NCTC11397","Cpseudotuberculosis_31","Cpseudotuberculosis_ATCC19410","Csilvaticum_KL0182","Culcerans_NCTC12077","Culcerans_NCTC7910"	0.0836116	0.0836116	3.12085	0.0836021	0.0836021	3.12085	258	0
ERS451417_01947	1717.62.peg.1947	NA	NA	NA	1	19	Cbelfantii_FRC0043,"Ccallunae_DSM20147","Cdeserti_GIMN1010","Cdiphtheriae_NCTC11397","Cefficiens_YS314","Cepidermidicanis_DSM45586","Cglutamicum_ATCC13032","Chalotolerans_YIM70093","Ckroppenstedtii_DSM44385","Clactis_RW25","Cmarinum_DSM44953","Cmaris_DSM45190","Cmustelae_DSM45274","Cpseudotuberculosis_31","Cpseudotuberculosis_ATCC19410","Ctestudinoris_DSM44614","Culcerans_NCTC12077","Culcerans_NC…	0.197123	0.197123	1.48271	0.197123	0.197123	1.48272	258	0
ERS451417_00894	1717.62.peg.900	NA	NA	NA	1	36	Cargentoratense_DSM44202,"Catypicum_R2070","Caurimucosum_ATCC700975","Cbelfantii_FRC0043","Ccallunae_DSM20147","Ccamporealensis_DSM44610","Cdeserti_GIMN1010","Cdiphtheriae_NCTC11397","Cdoosanense_DSM45436","Cefficiens_YS314","Cepidermidicanis_DSM45586","Cfalsenii_DSM44353","Cglutamicum_ATCC13032","Chalotolerans_YIM70093","Chumireducens_DSM45392","Cimitans_DSM44264","Cjeikeium_K41","Ckroppenstedti…	0.119738	0.119738	1.8978	0.119738	0.119738	1.8978	2	1	1. 0.66809;2. 251;3. 751;4. 277;5. 277;6. 829;7. 290;8. 868;9. 583;10. E;11. GAA
ERS451417_01532	1717.62.peg.1541	NA	NA	NA	1	38	Cargentoratense_DSM44202,"Catypicum_R2070","Caurimucosum_ATCC700975","Cbelfantii_FRC0043","Ccallunae_DSM20147","Ccamporealensis_DSM44610","Cdeserti_GIMN1010","Cdiphtheriae_NCTC11397","Cdoosanense_DSM45436","Cefficiens_YS314","Cepidermidicanis_DSM45586","Cfalsenii_DSM44353","Cglutamicum_ATCC13032","Cglycinophilum_AJ3170","Chalotolerans_YIM70093","Chumireducens_DSM45392","Cimitans_DSM44264","Cjeike…	0.195633	0.195633	1.46507	0.195633	0.195633	1.46507	258	0
ERS451417_00475	1717.62.peg.478	NA	NA	NA	1	39	Cargentoratense_DSM44202,"Catypicum_R2070","Caurimucosum_ATCC700975","Cbelfantii_FRC0043","Ccallunae_DSM20147","Ccamporealensis_DSM44610","Cdeserti_GIMN1010","Cdiphtheriae_NCTC11397","Cdoosanense_DSM45436","Cefficiens_YS314","Cepidermidicanis_DSM45586","Cfalsenii_DSM44353","Cglutamicum_ATCC13032","Cglycinophilum_AJ3170","Chalotolerans_YIM70093","Chumireducens_DSM45392","Cimitans_DSM44264","Cjeike…	0.183932	0.183932	1.88134	0.183932	0.183932	1.88134	2306	0
ERS451417_01790	1717.62.peg.1795	NA	NA	NA	1	37	Cargentoratense_DSM44202,"Catypicum_R2070","Caurimucosum_ATCC700975","Cbelfantii_FRC0043","Ccallunae_DSM20147","Ccamporealensis_DSM44610","Cdeserti_GIMN1010","Cdiphtheriae_NCTC11397","Cdoosanense_DSM45436","Cefficiens_YS314","Cepidermidicanis_DSM45586","Cfalsenii_DSM44353","Cglutamicum_ATCC13032","Cglycinophilum_AJ3170","Chalotolerans_YIM70093","Chumireducens_DSM45392","Cimitans_DSM44264","Cjeike…	0.167689	0.16768	1.6195	0.167996	0.167669	1.6195	3330	0
ERS451417_01350	1717.62.peg.1358	NA	NA	NA	1	38	Cargentoratense_DSM44202,"Catypicum_R2070","Caurimucosum_ATCC700975","Cbelfantii_FRC0043","Ccallunae_DSM20147","Ccamporealensis_DSM44610","Cdeserti_GIMN1010","Cdiphtheriae_NCTC11397","Cdoosanense_DSM45436","Cefficiens_YS314","Cepidermidicanis_DSM45586","Cfalsenii_DSM44353","Cglutamicum_ATCC13032","Cglycinophilum_AJ3170","Chalotolerans_YIM70093","Chumireducens_DSM45392","Cimitans_DSM44264","Cjeike…	0.170811	0.170811	1.59839	0.170811	0.170811	1.59839	2	4	1. 0.49197;2. 182;3. 544;4. 192;5. 192;6. 574;7. 192;8. 574;9. 454;10. P;11. CCC	1. 0.43132;2. 294;3. 880;4. 321;5. 321;6. 961;7. 328;8. 982;9. 763;10. I;11. ATT	1. 0.44625;2. 479;3. 1435;4. 510;5. 510;6. 1528;7. 517;8. 1549;9. 1270;10. L;11. TTG	1. 0.46722;2. 553;3. 1657;4. 585;5. 585;6. 1753;7. 593;8. 1777;9. 1462;10. V;11. GTT
ERS451417_01655	1717.62.peg.1662	NA	NA	NA	1	38	Cargentoratense_DSM44202,"Catypicum_R2070","Caurimucosum_ATCC700975","Cbelfantii_FRC0043","Ccallunae_DSM20147","Ccamporealensis_DSM44610","Cdeserti_GIMN1010","Cdiphtheriae_NCTC11397","Cdoosanense_DSM45436","Cefficiens_YS314","Cepidermidicanis_DSM45586","Cfalsenii_DSM44353","Cglutamicum_ATCC13032","Cglycinophilum_AJ3170","Chalotolerans_YIM70093","Chumireducens_DSM45392","Cimitans_DSM44264","Cjeike…	0.141687	0.141687	1.71533	0.141687	0.141687	1.71533	258	0
ERS451417_00708	1717.62.peg.713	NA	NA	NA	1	39	Cargentoratense_DSM44202,"Catypicum_R2070","Caurimucosum_ATCC700975","Cbelfantii_FRC0043","Ccallunae_DSM20147","Ccamporealensis_DSM44610","Cdeserti_GIMN1010","Cdiphtheriae_NCTC11397","Cdoosanense_DSM45436","Cefficiens_YS314","Cepidermidicanis_DSM45586","Cfalsenii_DSM44353","Cglutamicum_ATCC13032","Cglycinophilum_AJ3170","Chalotolerans_YIM70093","Chumireducens_DSM45392","Cimitans_DSM44264","Cjeike…	0.16098	0.16098	1.88953	0.16098	0.16098	1.88953	258	0
ERS451417_01520	1717.62.peg.1529	NA	NA	NA	1	15	Cargentoratense_DSM44202,"Cbelfantii_FRC0043","Cdiphtheriae_NCTC11397","Cefficiens_YS314","Cepidermidicanis_DSM45586","Ckroppenstedtii_DSM44385","Ckutscheri_DSM20755","Clactis_RW25","Cmustelae_DSM45274","Cpseudotuberculosis_31","Cpseudotuberculosis_ATCC19410","Csilvaticum_KL0182","Culcerans_NCTC12077","Culcerans_NCTC7910","Cvitaeruminis_DSM20294"	0.211458	0.211458	2.23113	0.211458	0.211458	2.23113	3074	2	1. 0.69049;2. 122;3. 364;4. 169;5. 169;6. 505;7. 179;8. 535;9. 211;10. R;11. CGT	1. 0.59881;2. 433;3. 1297;4. 510;5. 510;6. 1528;7. 544;8. 1630;9. 1006;10. V;11. GTG
ERS451417_02057	1717.62.peg.2069	NA	NA	NA	1	38	Cargentoratense_DSM44202,"Catypicum_R2070","Caurimucosum_ATCC700975","Cbelfantii_FRC0043","Ccallunae_DSM20147","Ccamporealensis_DSM44610","Cdeserti_GIMN1010","Cdiphtheriae_NCTC11397","Cdoosanense_DSM45436","Cefficiens_YS314","Cepidermidicanis_DSM45586","Cfalsenii_DSM44353","Cglutamicum_ATCC13032","Cglycinophilum_AJ3170","Chalotolerans_YIM70093","Chumireducens_DSM45392","Cimitans_DSM44264","Cjeike…	0.192135	0.192135	1.73832	0.192135	0.192135	1.73832	258	0
ERS451417_01638	1717.62.peg.1645	NA	NA	NA	1	26	Cargentoratense_DSM44202,"Catypicum_R2070","Caurimucosum_ATCC700975","Cbelfantii_FRC0043","Ccallunae_DSM20147","Ccamporealensis_DSM44610","Cdeserti_GIMN1010","Cdiphtheriae_NCTC11397","Cdoosanense_DSM45436","Cefficiens_YS314","Cepidermidicanis_DSM45586","Cglutamicum_ATCC13032","Chalotolerans_YIM70093","Cimitans_DSM44264","Ckutscheri_DSM20755","Cmustelae_DSM45274","Cpseudotuberculosis_31","Cpseudot…	0.454601	0.128171	1.68208	0.454601	0.128171	1.68208	3074	2	1. 0.88042;2. 49;3. 145;4. 75;5. 61;6. 181;7. 81;8. 241;9. 70;10. N;11. AAC	1. 0.87672;2. 95;3. 283;4. 132;5. 109;6. 325;7. 129;8. 385;9. 172;10. E;11. GAA
ERS451417_02145	1717.62.peg.2167	NA	NA	NA	1	38	Cargentoratense_DSM44202,"Catypicum_R2070","Caurimucosum_ATCC700975","Cbelfantii_FRC0043","Ccallunae_DSM20147","Ccamporealensis_DSM44610","Cdeserti_GIMN1010","Cdiphtheriae_NCTC11397","Cdoosanense_DSM45436","Cefficiens_YS314","Cepidermidicanis_DSM45586","Cfalsenii_DSM44353","Cglutamicum_ATCC13032","Cglycinophilum_AJ3170","Chalotolerans_YIM70093","Chumireducens_DSM45392","Cimitans_DSM44264","Cjeike…	0.114196	0.114196	1.6943	0.114196	0.114196	1.69435	2	1	1. 0.6919;2. 110;3. 328;4. 112;5. 112;6. 334;7. 112;8. 334;9. 292;10. D;11. GAC
ERS451417_01684	1717.62.peg.1691	NA	NA	NA	1	9	Cbelfantii_FRC0043,"Cdiphtheriae_NCTC11397","Ckutscheri_DSM20755","Cpseudotuberculosis_31","Cpseudotuberculosis_ATCC19410","Csilvaticum_KL0182","Culcerans_NCTC12077","Culcerans_NCTC7910","Cvitaeruminis_DSM20294"	0.21604	0.21604	2.8195	0.21604	0.21604	2.8195	2	1	1. 0.41663;2. 379;3. 1135;4. 462;5. 401;6. 1201;7. 431;8. 1291;9. 958;10. H;11. CAT
ERS451417_01955	1717.62.peg.1955	NA	NA	NA	1	38	Cargentoratense_DSM44202,"Catypicum_R2070","Caurimucosum_ATCC700975","Cbelfantii_FRC0043","Ccallunae_DSM20147","Ccamporealensis_DSM44610","Cdeserti_GIMN1010","Cdiphtheriae_NCTC11397","Cdoosanense_DSM45436","Cefficiens_YS314","Cepidermidicanis_DSM45586","Cfalsenii_DSM44353","Cglutamicum_ATCC13032","Cglycinophilum_AJ3170","Chalotolerans_YIM70093","Chumireducens_DSM45392","Cimitans_DSM44264","Cjeike…	0.246878	0.246878	1.79552	0.246878	0.246878	1.79551	2050	1	1. 0.57799;2. 296;3. 886;4. 319;5. 319;6. 955;7. 351;8. 1051;9. 724;10. L;11. TTG
ERS451417_02283	1717.62.peg.2312	NA	NA	NA	1	38	Cargentoratense_DSM44202,"Catypicum_R2070","Caurimucosum_ATCC700975","Cbelfantii_FRC0043","Ccallunae_DSM20147","Ccamporealensis_DSM44610","Cdeserti_GIMN1010","Cdiphtheriae_NCTC11397","Cdoosanense_DSM45436","Cefficiens_YS314","Cepidermidicanis_DSM45586","Cfalsenii_DSM44353","Cglutamicum_ATCC13032","Cglycinophilum_AJ3170","Chalotolerans_YIM70093","Chumireducens_DSM45392","Cimitans_DSM44264","Cjeike…	0.162373	0.162373	1.34989	0.162364	0.162364	1.34989	258	0
ERS451417_00212	1717.62.peg.209	NA	NA	NA	1	11	Cbelfantii_FRC0043,"Cdiphtheriae_NCTC11397","Ckroppenstedtii_DSM44385","Clactis_RW25","Cmustelae_DSM45274","Cpseudotuberculosis_31","Cpseudotuberculosis_ATCC19410","Crouxii_FRC0190","Csilvaticum_KL0182","Culcerans_NCTC12077","Culcerans_NCTC7910"	0.0428012	0.0428012	2.39381	0.0428012	0.0428012	2.39382	2	1	1. 0.4854;2. 123;3. 367;4. 139;5. 139;6. 415;7. 151;8. 451;9. 298;10. G;11. GGC
ERS451417_00968	1717.62.peg.976	NA	NA	NA	1	16	Cbelfantii_FRC0043,"Ccallunae_DSM20147","Cdeserti_GIMN1010","Cdiphtheriae_NCTC11397","Cepidermidicanis_DSM45586","Cglutamicum_ATCC13032","Cglycinophilum_AJ3170","Ckutscheri_DSM20755","Clactis_RW25","Cpseudotuberculosis_31","Cpseudotuberculosis_ATCC19410","Crouxii_FRC0190","Csilvaticum_KL0182","Ctestudinoris_DSM44614","Culcerans_NCTC12077","Culcerans_NCTC7910"	0.282106	0.113937	2.31906	0.282097	0.113937	2.31907	3074	1	1. 0.78411;2. 64;3. 190;4. 82;5. 82;6. 244;7. 125;8. 373;9. 151;10. V;11. GTA
ERS451417_00895	1717.62.peg.901	NA	NA	NA	1	36	Cargentoratense_DSM44202,"Catypicum_R2070","Caurimucosum_ATCC700975","Cbelfantii_FRC0043","Ccallunae_DSM20147","Ccamporealensis_DSM44610","Cdeserti_GIMN1010","Cdiphtheriae_NCTC11397","Cdoosanense_DSM45436","Cefficiens_YS314","Cepidermidicanis_DSM45586","Cfalsenii_DSM44353","Cglutamicum_ATCC13032","Chalotolerans_YIM70093","Chumireducens_DSM45392","Cimitans_DSM44264","Cjeikeium_K41","Ckroppenstedti…	0.102883	0.102883	1.67151	0.102883	0.102883	1.67151	258	0
ERS451417_01652	1717.62.peg.1659	NA	NA	NA	1	38	Cargentoratense_DSM44202,"Catypicum_R2070","Caurimucosum_ATCC700975","Cbelfantii_FRC0043","Ccallunae_DSM20147","Ccamporealensis_DSM44610","Cdeserti_GIMN1010","Cdiphtheriae_NCTC11397","Cdoosanense_DSM45436","Cefficiens_YS314","Cepidermidicanis_DSM45586","Cfalsenii_DSM44353","Cglutamicum_ATCC13032","Cglycinophilum_AJ3170","Chalotolerans_YIM70093","Chumireducens_DSM45392","Cimitans_DSM44264","Cjeike…	0.15812	0.15812	1.48612	0.15812	0.15812	1.48612	258	0
ERS451417_00890	1717.62.peg.896	NA	NA	NA	1	34	Cargentoratense_DSM44202,"Catypicum_R2070","Caurimucosum_ATCC700975","Cbelfantii_FRC0043","Ccallunae_DSM20147","Ccamporealensis_DSM44610","Cdeserti_GIMN1010","Cdiphtheriae_NCTC11397","Cdoosanense_DSM45436","Cefficiens_YS314","Cepidermidicanis_DSM45586","Cglutamicum_ATCC13032","Chalotolerans_YIM70093","Chumireducens_DSM45392","Cimitans_DSM44264","Ckroppenstedtii_DSM44385","Ckutscheri_DSM20755","Cl…	0.0558295	0.0558295	1.59	0.0558295	0.0558295	1.59	2306	0
ERS451417_02123	1717.62.peg.2138	NA	NA	NA	1	38	Cargentoratense_DSM44202,"Catypicum_R2070","Caurimucosum_ATCC700975","Cbelfantii_FRC0043","Ccallunae_DSM20147","Ccamporealensis_DSM44610","Cdeserti_GIMN1010","Cdiphtheriae_NCTC11397","Cdoosanense_DSM45436","Cefficiens_YS314","Cepidermidicanis_DSM45586","Cfalsenii_DSM44353","Cglutamicum_ATCC13032","Cglycinophilum_AJ3170","Chalotolerans_YIM70093","Chumireducens_DSM45392","Cimitans_DSM44264","Cjeike…	0.0604587	0.0604587	2.12271	0.0604587	0.0604587	2.12272	258	0
ERS451417_00452	1717.62.peg.456	NA	NA	NA	1	10	Cbelfantii_FRC0043,"Cdiphtheriae_NCTC11397","Cepidermidicanis_DSM45586","Cmustelae_DSM45274","Cpseudotuberculosis_31","Cpseudotuberculosis_ATCC19410","Crouxii_FRC0190","Csilvaticum_KL0182","Culcerans_NCTC12077","Culcerans_NCTC7910"	0.327476	0.206226	2.28982	0.327476	0.206226	2.28982	2	2	1. 0.71317;2. 58;3. 172;4. 92;5. 77;6. 229;7. 81;8. 241;9. 109;10. S;11. AGC	1. 0.70157;2. 116;3. 346;4. 152;5. 135;6. 403;7. 139;8. 415;9. 277;10. I;11. ATC
ERS451417_01668	1717.62.peg.1675	NA	NA	NA	1	38	Cargentoratense_DSM44202,"Catypicum_R2070","Caurimucosum_ATCC700975","Cbelfantii_FRC0043","Ccallunae_DSM20147","Ccamporealensis_DSM44610","Cdeserti_GIMN1010","Cdiphtheriae_NCTC11397","Cdoosanense_DSM45436","Cefficiens_YS314","Cepidermidicanis_DSM45586","Cfalsenii_DSM44353","Cglutamicum_ATCC13032","Cglycinophilum_AJ3170","Chalotolerans_YIM70093","Chumireducens_DSM45392","Cimitans_DSM44264","Cjeike…	0.140312	0.140312	1.70384	0.140312	0.140312	1.70383	258	0
ERS451417_01293	1717.62.peg.1301	NA	NA	NA	1	38	Cargentoratense_DSM44202,"Catypicum_R2070","Caurimucosum_ATCC700975","Cbelfantii_FRC0043","Ccallunae_DSM20147","Ccamporealensis_DSM44610","Cdeserti_GIMN1010","Cdiphtheriae_NCTC11397","Cdoosanense_DSM45436","Cefficiens_YS314","Cepidermidicanis_DSM45586","Cfalsenii_DSM44353","Cglutamicum_ATCC13032","Cglycinophilum_AJ3170","Chalotolerans_YIM70093","Chumireducens_DSM45392","Cimitans_DSM44264","Cjeike…	0.0834708	0.0834708	1.52102	0.0834708	0.0834708	1.52103	2	1	1. 0.45143;2. 78;3. 232;4. 80;5. 80;6. 238;7. 81;8. 241;9. 214;10. D;11. GAT
ERS451417_01645	1717.62.peg.1652	NA	NA	NA	1	20	Cargentoratense_DSM44202,"Catypicum_R2070","Cbelfantii_FRC0043","Ccallunae_DSM20147","Cdeserti_GIMN1010","Cdiphtheriae_NCTC11397","Cefficiens_YS314","Cglutamicum_ATCC13032","Chalotolerans_YIM70093","Chumireducens_DSM45392","Cimitans_DSM44264","Ckutscheri_DSM20755","Cmarinum_DSM44953","Cmaris_DSM45190","Cmustelae_DSM45274","Cpseudotuberculosis_ATCC19410","Csilvaticum_KL0182","Ctestudinoris_DSM4461…	0.243008	0.243008	1.52895	0.242999	0.242999	1.52895	2306	0
ERS451417_00250	1717.62.peg.245	NA	NA	NA	1	8	Cbelfantii_FRC0043,"Cdiphtheriae_NCTC11397","Cpseudotuberculosis_31","Cpseudotuberculosis_ATCC19410","Crouxii_FRC0190","Csilvaticum_KL0182","Culcerans_NCTC12077","Culcerans_NCTC7910"	0.165098	0.165098	5.21488	0.165098	0.165098	5.21488	2050	1	1. 0.48816;2. 66;3. 196;4. 71;5. 70;6. 208;7. 70;8. 208;9. 58;10. I;11. ATT
ERS451417_01755	1717.62.peg.1758	NA	NA	NA	1	35	Caurimucosum_ATCC700975,"Cbelfantii_FRC0043","Ccallunae_DSM20147","Ccamporealensis_DSM44610","Cdeserti_GIMN1010","Cdiphtheriae_NCTC11397","Cdoosanense_DSM45436","Cefficiens_YS314","Cepidermidicanis_DSM45586","Cfalsenii_DSM44353","Cglutamicum_ATCC13032","Cglycinophilum_AJ3170","Chalotolerans_YIM70093","Chumireducens_DSM45392","Cimitans_DSM44264","Cjeikeium_K41","Ckutscheri_DSM20755","Clactis_RW25"…	0.216723	0.216723	1.69755	0.216723	0.216723	1.69755	3330	0
ERS451417_00397	1717.62.peg.397	NA	NA	NA	1	39	Cargentoratense_DSM44202,"Catypicum_R2070","Caurimucosum_ATCC700975","Cbelfantii_FRC0043","Ccallunae_DSM20147","Ccamporealensis_DSM44610","Cdeserti_GIMN1010","Cdiphtheriae_NCTC11397","Cdoosanense_DSM45436","Cefficiens_YS314","Cepidermidicanis_DSM45586","Cfalsenii_DSM44353","Cglutamicum_ATCC13032","Cglycinophilum_AJ3170","Chalotolerans_YIM70093","Chumireducens_DSM45392","Cimitans_DSM44264","Cjeike…	0.15823	0.15823	1.64249	0.15823	0.15823	1.64249	258	0
ERS451417_01331	1717.62.peg.1339	NA	NA	NA	1	38	Cargentoratense_DSM44202,"Catypicum_R2070","Caurimucosum_ATCC700975","Cbelfantii_FRC0043","Ccallunae_DSM20147","Ccamporealensis_DSM44610","Cdeserti_GIMN1010","Cdiphtheriae_NCTC11397","Cdoosanense_DSM45436","Cefficiens_YS314","Cepidermidicanis_DSM45586","Cfalsenii_DSM44353","Cglutamicum_ATCC13032","Cglycinophilum_AJ3170","Chalotolerans_YIM70093","Chumireducens_DSM45392","Cimitans_DSM44264","Cjeike…	0.121421	0.121421	1.77184	0.121421	0.121421	1.77184	258	0
ERS451417_01302	1717.62.peg.1310	NA	NA	NA	1	38	Cargentoratense_DSM44202,"Catypicum_R2070","Caurimucosum_ATCC700975","Cbelfantii_FRC0043","Ccallunae_DSM20147","Ccamporealensis_DSM44610","Cdeserti_GIMN1010","Cdiphtheriae_NCTC11397","Cdoosanense_DSM45436","Cefficiens_YS314","Cepidermidicanis_DSM45586","Cfalsenii_DSM44353","Cglutamicum_ATCC13032","Cglycinophilum_AJ3170","Chalotolerans_YIM70093","Chumireducens_DSM45392","Cimitans_DSM44264","Cjeike…	0.173832	0.173832	1.59839	0.173832	0.173832	1.59839	2	1	1. 0.5184;2. 107;3. 319;4. 123;5. 123;6. 367;7. 148;8. 442;9. 277;10. K;11. AAA
ERS451417_00942	1717.62.peg.949	NA	NA	NA	1	30	Cargentoratense_DSM44202,"Catypicum_R2070","Caurimucosum_ATCC700975","Cbelfantii_FRC0043","Ccamporealensis_DSM44610","Cdiphtheriae_NCTC11397","Cdoosanense_DSM45436","Cepidermidicanis_DSM45586","Cglycinophilum_AJ3170","Chalotolerans_YIM70093","Chumireducens_DSM45392","Cimitans_DSM44264","Ckroppenstedtii_DSM44385","Ckutscheri_DSM20755","Clactis_RW25","Cmarinum_DSM44953","Cmustelae_DSM45274","Cpseud…	0.122431	0.122431	1.76125	0.122431	0.122431	1.76125	258	0
ERS451417_00718	1717.62.peg.723	NA	NA	NA	1	29	Cargentoratense_DSM44202,"Caurimucosum_ATCC700975","Cbelfantii_FRC0043","Ccallunae_DSM20147","Ccamporealensis_DSM44610","Cdeserti_GIMN1010","Cdiphtheriae_NCTC11397","Cdoosanense_DSM45436","Cefficiens_YS314","Cepidermidicanis_DSM45586","Cglutamicum_ATCC13032","Chalotolerans_YIM70093","Chumireducens_DSM45392","Cimitans_DSM44264","Cmarinum_DSM44953","Cmaris_DSM45190","Cmustelae_DSM45274","Cpseudotub…	0.283196	0.283196	1.72486	0.283196	0.283196	1.72486	2306	0
ERS451417_00771	1717.62.peg.776	NA	NA	NA	1	38	Cargentoratense_DSM44202,"Catypicum_R2070","Caurimucosum_ATCC700975","Cbelfantii_FRC0043","Ccallunae_DSM20147","Ccamporealensis_DSM44610","Cdeserti_GIMN1010","Cdiphtheriae_NCTC11397","Cdoosanense_DSM45436","Cefficiens_YS314","Cepidermidicanis_DSM45586","Cfalsenii_DSM44353","Cglutamicum_ATCC13032","Cglycinophilum_AJ3170","Chalotolerans_YIM70093","Chumireducens_DSM45392","Cimitans_DSM44264","Cjeike…	0.13339	0.13339	2.30416	0.13339	0.13339	2.30416	2306	0
ERS451417_00128	1717.62.peg.126	NA	NA	NA	1	39	Cargentoratense_DSM44202,"Catypicum_R2070","Caurimucosum_ATCC700975","Cbelfantii_FRC0043","Ccallunae_DSM20147","Ccamporealensis_DSM44610","Cdeserti_GIMN1010","Cdiphtheriae_NCTC11397","Cdoosanense_DSM45436","Cefficiens_YS314","Cepidermidicanis_DSM45586","Cfalsenii_DSM44353","Cglutamicum_ATCC13032","Cglycinophilum_AJ3170","Chalotolerans_YIM70093","Chumireducens_DSM45392","Cimitans_DSM44264","Cjeike…	0.162895	0.162895	1.78273	0.162895	0.162895	1.78273	258	0
ERS451417_00509	1717.62.peg.513	NA	NA	NA	1	39	Cargentoratense_DSM44202,"Catypicum_R2070","Caurimucosum_ATCC700975","Cbelfantii_FRC0043","Ccallunae_DSM20147","Ccamporealensis_DSM44610","Cdeserti_GIMN1010","Cdiphtheriae_NCTC11397","Cdoosanense_DSM45436","Cefficiens_YS314","Cepidermidicanis_DSM45586","Cfalsenii_DSM44353","Cglutamicum_ATCC13032","Cglycinophilum_AJ3170","Chalotolerans_YIM70093","Chumireducens_DSM45392","Cimitans_DSM44264","Cjeike…	0.101692	0.101692	2.45381	0.101682	0.101682	2.4538	258	0
ERS451417_01679	1717.62.peg.1686	NA	NA	NA	1	19	Cargentoratense_DSM44202,"Caurimucosum_ATCC700975","Cbelfantii_FRC0043","Ccallunae_DSM20147","Cdeserti_GIMN1010","Cdiphtheriae_NCTC11397","Cdoosanense_DSM45436","Cglutamicum_ATCC13032","Chalotolerans_YIM70093","Ckutscheri_DSM20755","Clactis_RW25","Cmustelae_DSM45274","Csilvaticum_KL0182","Csimulans_PES1","Csingulare_IBSB52218","Cterpenotabidum_Y11","Culcerans_NCTC12077","Culcerans_NCTC7910","Cure…	0.41422	0.41422	1.95915	0.41422	0.41422	1.95915	258	0
ERS451417_02140	1717.62.peg.2160	NA	NA	NA	1	32	Caurimucosum_ATCC700975,"Cbelfantii_FRC0043","Ccallunae_DSM20147","Cdeserti_GIMN1010","Cdiphtheriae_NCTC11397","Cdoosanense_DSM45436","Cefficiens_YS314","Cepidermidicanis_DSM45586","Cfalsenii_DSM44353","Cglutamicum_ATCC13032","Cglycinophilum_AJ3170","Chalotolerans_YIM70093","Chumireducens_DSM45392","Cimitans_DSM44264","Cjeikeium_K41","Ckutscheri_DSM20755","Clactis_RW25","Cmarinum_DSM44953","Cmari…	0.112259	0.112259	1.66174	0.112259	0.112259	1.66174	2306	0
ERS451417_01272	1717.62.peg.1280	NA	NA	NA	1	17	Cargentoratense_DSM44202,"Cbelfantii_FRC0043","Cdiphtheriae_NCTC11397","Cefficiens_YS314","Cepidermidicanis_DSM45586","Cglutamicum_ATCC13032","Ckroppenstedtii_DSM44385","Ckutscheri_DSM20755","Clactis_RW25","Cmustelae_DSM45274","Cpseudotuberculosis_31","Cpseudotuberculosis_ATCC19410","Crouxii_FRC0190","Csilvaticum_KL0182","Culcerans_NCTC12077","Culcerans_NCTC7910","Cvitaeruminis_DSM20294"	0.0719204	0.0719204	2.12244	0.0719204	0.0719204	2.12244	258	0
ERS451417_01178	1717.62.peg.1187	NA	NA	NA	1	39	Cargentoratense_DSM44202,"Catypicum_R2070","Caurimucosum_ATCC700975","Cbelfantii_FRC0043","Ccallunae_DSM20147","Ccamporealensis_DSM44610","Cdeserti_GIMN1010","Cdiphtheriae_NCTC11397","Cdoosanense_DSM45436","Cefficiens_YS314","Cepidermidicanis_DSM45586","Cfalsenii_DSM44353","Cglutamicum_ATCC13032","Cglycinophilum_AJ3170","Chalotolerans_YIM70093","Chumireducens_DSM45392","Cimitans_DSM44264","Cjeike…	0.172291	0.172291	1.65519	0.172291	0.172291	1.65519	1282	0
ERS451417_00474	1717.62.peg.477	NA	NA	NA	1	39	Cargentoratense_DSM44202,"Catypicum_R2070","Caurimucosum_ATCC700975","Cbelfantii_FRC0043","Ccallunae_DSM20147","Ccamporealensis_DSM44610","Cdeserti_GIMN1010","Cdiphtheriae_NCTC11397","Cdoosanense_DSM45436","Cefficiens_YS314","Cepidermidicanis_DSM45586","Cfalsenii_DSM44353","Cglutamicum_ATCC13032","Cglycinophilum_AJ3170","Chalotolerans_YIM70093","Chumireducens_DSM45392","Cimitans_DSM44264","Cjeike…	0.111791	0.111791	1.89618	0.111791	0.111791	1.89618	258	0
ERS451417_01045	1717.62.peg.1055	NA	NA	NA	1	39	Cargentoratense_DSM44202,"Catypicum_R2070","Caurimucosum_ATCC700975","Cbelfantii_FRC0043","Ccallunae_DSM20147","Ccamporealensis_DSM44610","Cdeserti_GIMN1010","Cdiphtheriae_NCTC11397","Cdoosanense_DSM45436","Cefficiens_YS314","Cepidermidicanis_DSM45586","Cfalsenii_DSM44353","Cglutamicum_ATCC13032","Cglycinophilum_AJ3170","Chalotolerans_YIM70093","Chumireducens_DSM45392","Cimitans_DSM44264","Cjeike…	0.24258	0.24258	1.54518	0.242589	0.242589	1.54518	258	0
ERS451417_01781	1717.62.peg.1786	NA	NA	NA	1	11	Cbelfantii_FRC0043,"Cdiphtheriae_NCTC11397","Chalotolerans_YIM70093","Ckutscheri_DSM20755","Cmustelae_DSM45274","Cpseudotuberculosis_31","Cpseudotuberculosis_ATCC19410","Csilvaticum_KL0182","Culcerans_NCTC12077","Culcerans_NCTC7910","Cvitaeruminis_DSM20294"	0.142974	0.142974	2.14768	0.142964	0.142964	2.14768	3330	0
ERS451417_01745	1717.62.peg.1748	NA	NA	NA	1	33	Cargentoratense_DSM44202,"Caurimucosum_ATCC700975","Cbelfantii_FRC0043","Ccallunae_DSM20147","Cdeserti_GIMN1010","Cdiphtheriae_NCTC11397","Cefficiens_YS314","Cepidermidicanis_DSM45586","Cfalsenii_DSM44353","Cglutamicum_ATCC13032","Cglycinophilum_AJ3170","Chalotolerans_YIM70093","Chumireducens_DSM45392","Cimitans_DSM44264","Cjeikeium_K41","Ckutscheri_DSM20755","Clactis_RW25","Cmarinum_DSM44953","C…	0.1734	0.1734	1.41782	0.1734	0.1734	1.41783	7170	6	1. 0.50867;2. 39;3. 115;4. 75;5. 75;6. 223;7. 95;8. 283;9. 55;10. A;11. GCG	1. 0.42858;2. 79;3. 235;4. 115;5. 115;6. 343;7. 136;8. 406;9. 163;10. G;11. GGC	1. 0.42398;2. 132;3. 394;4. 172;5. 172;6. 514;7. 197;8. 589;9. 289;10. I;11. ATT	1. 0.46511;2. 336;3. 1006;4. 403;5. 403;6. 1207;7. 474;8. 1420;9. 775;10. E;11. GAA	1. 0.44646;2. 369;3. 1105;4. 436;5. 436;6. 1306;7. 507;8. 1519;9. 874;10. L;11. CTG	1. 0.41494;2. 400;3. 1198;4. 477;5. 477;6. 1429;7. 563;8. 1687;9. 946;10. P;11. CCG
ERS451417_01449	1717.62.peg.1456	NA	NA	NA	1	35	Cargentoratense_DSM44202,"Catypicum_R2070","Caurimucosum_ATCC700975","Cbelfantii_FRC0043","Ccallunae_DSM20147","Ccamporealensis_DSM44610","Cdeserti_GIMN1010","Cdiphtheriae_NCTC11397","Cdoosanense_DSM45436","Cefficiens_YS314","Cepidermidicanis_DSM45586","Cfalsenii_DSM44353","Cglutamicum_ATCC13032","Cglycinophilum_AJ3170","Chalotolerans_YIM70093","Chumireducens_DSM45392","Cimitans_DSM44264","Cjeike…	0.0800615	0.0800615	1.58445	0.0800615	0.0800615	1.58445	3330	0
ERS451417_00588	1717.62.peg.592	NA	NA	NA	1	31	Cargentoratense_DSM44202,"Catypicum_R2070","Caurimucosum_ATCC700975","Cbelfantii_FRC0043","Ccallunae_DSM20147","Ccamporealensis_DSM44610","Cdeserti_GIMN1010","Cdiphtheriae_NCTC11397","Cdoosanense_DSM45436","Cefficiens_YS314","Cglutamicum_ATCC13032","Chalotolerans_YIM70093","Chumireducens_DSM45392","Cimitans_DSM44264","Ckutscheri_DSM20755","Cmarinum_DSM44953","Cmaris_DSM45190","Cmustelae_DSM45274"…	0.30493	0.30493	1.63682	0.30493	0.30493	1.63682	1282	0
ERS451417_00584	1717.62.peg.588	NA	NA	NA	1	33	Cargentoratense_DSM44202,"Caurimucosum_ATCC700975","Cbelfantii_FRC0043","Ccallunae_DSM20147","Ccamporealensis_DSM44610","Cdeserti_GIMN1010","Cdiphtheriae_NCTC11397","Cefficiens_YS314","Cepidermidicanis_DSM45586","Cfalsenii_DSM44353","Cglutamicum_ATCC13032","Chalotolerans_YIM70093","Chumireducens_DSM45392","Cimitans_DSM44264","Cjeikeium_K41","Ckroppenstedtii_DSM44385","Ckutscheri_DSM20755","Clacti…	0.0907226	0.0907226	2.28508	0.0907226	0.0907226	2.28508	3330	0
ERS451417_00880	1717.62.peg.886	NA	NA	NA	1	8	Cbelfantii_FRC0043,"Cdiphtheriae_NCTC11397","Cpseudotuberculosis_31","Cpseudotuberculosis_ATCC19410","Crouxii_FRC0190","Csilvaticum_KL0182","Culcerans_NCTC12077","Culcerans_NCTC7910"	0.150945	0.111298	2.31012	0.150945	0.111298	2.31012	2	1	1. 0.72659;2. 31;3. 91;4. 34;5. 33;6. 97;7. 33;8. 97;9. 73;10. Q;11. CAA
ERS451417_01194	1717.62.peg.1203	NA	NA	NA	1	30	Caurimucosum_ATCC700975,"Cbelfantii_FRC0043","Ccallunae_DSM20147","Ccamporealensis_DSM44610","Cdeserti_GIMN1010","Cdiphtheriae_NCTC11397","Cdoosanense_DSM45436","Cefficiens_YS314","Cepidermidicanis_DSM45586","Cglutamicum_ATCC13032","Chalotolerans_YIM70093","Chumireducens_DSM45392","Cimitans_DSM44264","Ckutscheri_DSM20755","Cmarinum_DSM44953","Cmaris_DSM45190","Cmustelae_DSM45274","Cpseudotubercul…	0.179128	0.179128	1.67659	0.179128	0.179128	1.67659	258	0
ERS451417_00361	1717.62.peg.360	NA	NA	NA	1	39	Cargentoratense_DSM44202,"Catypicum_R2070","Caurimucosum_ATCC700975","Cbelfantii_FRC0043","Ccallunae_DSM20147","Ccamporealensis_DSM44610","Cdeserti_GIMN1010","Cdiphtheriae_NCTC11397","Cdoosanense_DSM45436","Cefficiens_YS314","Cepidermidicanis_DSM45586","Cfalsenii_DSM44353","Cglutamicum_ATCC13032","Cglycinophilum_AJ3170","Chalotolerans_YIM70093","Chumireducens_DSM45392","Cimitans_DSM44264","Cjeike…	0.160282	0.160282	1.65322	0.160282	0.160282	1.65322	258	0
ERS451417_01458	1717.62.peg.1468	NA	NA	NA	1	35	Cargentoratense_DSM44202,"Catypicum_R2070","Caurimucosum_ATCC700975","Cbelfantii_FRC0043","Ccallunae_DSM20147","Ccamporealensis_DSM44610","Cdeserti_GIMN1010","Cdiphtheriae_NCTC11397","Cdoosanense_DSM45436","Cefficiens_YS314","Cepidermidicanis_DSM45586","Cglutamicum_ATCC13032","Cglycinophilum_AJ3170","Chalotolerans_YIM70093","Chumireducens_DSM45392","Cimitans_DSM44264","Ckroppenstedtii_DSM44385","…	0.0549519	0.0549519	1.22586	0.0551294	0.0551294	1.25269	258	0
ERS451417_01539	1717.62.peg.1548	NA	NA	NA	1	38	Cargentoratense_DSM44202,"Catypicum_R2070","Caurimucosum_ATCC700975","Cbelfantii_FRC0043","Ccallunae_DSM20147","Ccamporealensis_DSM44610","Cdeserti_GIMN1010","Cdiphtheriae_NCTC11397","Cdoosanense_DSM45436","Cefficiens_YS314","Cepidermidicanis_DSM45586","Cfalsenii_DSM44353","Cglutamicum_ATCC13032","Cglycinophilum_AJ3170","Chalotolerans_YIM70093","Chumireducens_DSM45392","Cimitans_DSM44264","Cjeike…	0.0418777	0.0418777	1.38684	0.0418777	0.0418777	1.38684	258	0
ERS451417_02393	1717.62.peg.2425	NA	NA	NA	1	9	Cbelfantii_FRC0043,"Cdiphtheriae_NCTC11397","Cmustelae_DSM45274","Cpseudotuberculosis_31","Cpseudotuberculosis_ATCC19410","Csilvaticum_KL0182","Culcerans_NCTC12077","Culcerans_NCTC7910","Cvitaeruminis_DSM20294"	0.134553	0.134553	2.49083	0.134553	0.134553	2.49083	3074	1	1. 0.55612;2. 337;3. 1009;4. 593;5. 405;6. 1213;7. 443;8. 1327;9. 793;10. D;11. GAT
ERS451417_01799	1717.62.peg.1804	NA	NA	NA	1	38	Cargentoratense_DSM44202,"Catypicum_R2070","Caurimucosum_ATCC700975","Cbelfantii_FRC0043","Ccallunae_DSM20147","Ccamporealensis_DSM44610","Cdeserti_GIMN1010","Cdiphtheriae_NCTC11397","Cdoosanense_DSM45436","Cefficiens_YS314","Cepidermidicanis_DSM45586","Cfalsenii_DSM44353","Cglutamicum_ATCC13032","Cglycinophilum_AJ3170","Chalotolerans_YIM70093","Chumireducens_DSM45392","Cimitans_DSM44264","Cjeike…	0.156473	0.156473	2.08717	0.156473	0.156473	2.08717	258	0
ERS451417_00639	1717.62.peg.643	NA	NA	NA	1	19	Cargentoratense_DSM44202,"Cbelfantii_FRC0043","Cdiphtheriae_NCTC11397","Cepidermidicanis_DSM45586","Cfalsenii_DSM44353","Cglycinophilum_AJ3170","Chalotolerans_YIM70093","Chumireducens_DSM45392","Clactis_RW25","Cmarinum_DSM44953","Cmustelae_DSM45274","Cpseudotuberculosis_31","Cpseudotuberculosis_ATCC19410","Crouxii_FRC0190","Csilvaticum_KL0182","Ctestudinoris_DSM44614","Culcerans_NCTC12077","Culce…	0.137672	0.137672	1.69544	0.137672	0.137672	1.69543	2	2	1. 0.52332;2. 19;3. 55;4. 19;5. 19;6. 55;7. 19;8. 55;9. 52;10. E;11. GAA	1. 0.55389;2. 172;3. 514;4. 191;5. 191;6. 571;7. 223;8. 667;9. 442;10. M;11. ATG
ERS451417_01317	1717.62.peg.1325	NA	NA	NA	1	36	Catypicum_R2070,"Caurimucosum_ATCC700975","Cbelfantii_FRC0043","Ccallunae_DSM20147","Ccamporealensis_DSM44610","Cdeserti_GIMN1010","Cdiphtheriae_NCTC11397","Cdoosanense_DSM45436","Cefficiens_YS314","Cepidermidicanis_DSM45586","Cfalsenii_DSM44353","Cglutamicum_ATCC13032","Cglycinophilum_AJ3170","Chalotolerans_YIM70093","Chumireducens_DSM45392","Cimitans_DSM44264","Cjeikeium_K41","Ckroppenstedtii_D…	0.233101	0.233101	1.85645	0.233101	0.233101	1.85645	1282	0
ERS451417_00412	1717.62.peg.412	NA	NA	NA	1	13	Catypicum_R2070,"Cbelfantii_FRC0043","Ccamporealensis_DSM44610","Cdiphtheriae_NCTC11397","Cepidermidicanis_DSM45586","Ckutscheri_DSM20755","Cpseudotuberculosis_31","Cpseudotuberculosis_ATCC19410","Crouxii_FRC0190","Csilvaticum_KL0182","Csimulans_PES1","Culcerans_NCTC12077","Culcerans_NCTC7910"	0.18072	0.18072	2.50643	0.18072	0.18072	2.50644	2306	0
ERS451417_00391	1717.62.peg.391	NA	NA	NA	1	39	Cargentoratense_DSM44202,"Catypicum_R2070","Caurimucosum_ATCC700975","Cbelfantii_FRC0043","Ccallunae_DSM20147","Ccamporealensis_DSM44610","Cdeserti_GIMN1010","Cdiphtheriae_NCTC11397","Cdoosanense_DSM45436","Cefficiens_YS314","Cepidermidicanis_DSM45586","Cfalsenii_DSM44353","Cglutamicum_ATCC13032","Cglycinophilum_AJ3170","Chalotolerans_YIM70093","Chumireducens_DSM45392","Cimitans_DSM44264","Cjeike…	0.0971543	0.0971543	1.7025	0.0971543	0.0971543	1.7025	258	0
ERS451417_01155	1717.62.peg.1166	NA	NA	NA	1	39	Cargentoratense_DSM44202,"Catypicum_R2070","Caurimucosum_ATCC700975","Cbelfantii_FRC0043","Ccallunae_DSM20147","Ccamporealensis_DSM44610","Cdeserti_GIMN1010","Cdiphtheriae_NCTC11397","Cdoosanense_DSM45436","Cefficiens_YS314","Cepidermidicanis_DSM45586","Cfalsenii_DSM44353","Cglutamicum_ATCC13032","Cglycinophilum_AJ3170","Chalotolerans_YIM70093","Chumireducens_DSM45392","Cimitans_DSM44264","Cjeike…	0.264913	0.0658143	1.55707	0.0664123	0.0658143	1.55707	258	0
ERS451417_01161	1717.62.peg.1172	NA	NA	NA	1	37	Cargentoratense_DSM44202,"Caurimucosum_ATCC700975","Cbelfantii_FRC0043","Ccallunae_DSM20147","Ccamporealensis_DSM44610","Cdeserti_GIMN1010","Cdiphtheriae_NCTC11397","Cdoosanense_DSM45436","Cefficiens_YS314","Cepidermidicanis_DSM45586","Cfalsenii_DSM44353","Cglutamicum_ATCC13032","Cglycinophilum_AJ3170","Chalotolerans_YIM70093","Chumireducens_DSM45392","Cimitans_DSM44264","Cjeikeium_K41","Ckroppen…	0.221355	0.221355	1.37812	0.221355	0.221355	1.37812	1282	0
ERS451417_01648	1717.62.peg.1655	NA	NA	NA	1	38	Cargentoratense_DSM44202,"Catypicum_R2070","Caurimucosum_ATCC700975","Cbelfantii_FRC0043","Ccallunae_DSM20147","Ccamporealensis_DSM44610","Cdeserti_GIMN1010","Cdiphtheriae_NCTC11397","Cdoosanense_DSM45436","Cefficiens_YS314","Cepidermidicanis_DSM45586","Cfalsenii_DSM44353","Cglutamicum_ATCC13032","Cglycinophilum_AJ3170","Chalotolerans_YIM70093","Chumireducens_DSM45392","Cimitans_DSM44264","Cjeike…	0.116381	0.116381	1.68437	0.116381	0.116381	1.68438	258	0
ERS451417_01569	1717.62.peg.1578	NA	NA	NA	1	38	Cargentoratense_DSM44202,"Catypicum_R2070","Caurimucosum_ATCC700975","Cbelfantii_FRC0043","Ccallunae_DSM20147","Ccamporealensis_DSM44610","Cdeserti_GIMN1010","Cdiphtheriae_NCTC11397","Cdoosanense_DSM45436","Cefficiens_YS314","Cepidermidicanis_DSM45586","Cfalsenii_DSM44353","Cglutamicum_ATCC13032","Cglycinophilum_AJ3170","Chalotolerans_YIM70093","Chumireducens_DSM45392","Cimitans_DSM44264","Cjeike…	0.125786	0.125786	1.92941	0.125786	0.125786	1.92941	258	0
ERS451417_01961	1717.62.peg.1961	NA	NA	NA	1	6	Cbelfantii_FRC0043,"Cdiphtheriae_NCTC11397","Cpseudotuberculosis_31","Cpseudotuberculosis_ATCC19410","Culcerans_NCTC12077","Culcerans_NCTC7910"	0.172407	0.157966	2.17633	0.172407	0.157966	2.17633	2	2	1. 0.42591;2. 57;3. 169;4. 60;5. 57;6. 169;7. 57;8. 169;9. 166;10. K;11. AAA	1. 0.55982;2. 112;3. 334;4. 117;5. 112;6. 334;7. 112;8. 334;9. 331;10. I;11. ATT
ERS451417_02070	1717.62.peg.2082	NA	NA	NA	1	7	Cbelfantii_FRC0043,"Cdiphtheriae_NCTC11397","Cpseudotuberculosis_31","Cpseudotuberculosis_ATCC19410","Csilvaticum_KL0182","Culcerans_NCTC12077","Culcerans_NCTC7910"	23.8084	0.1151	2.40639	0.115752	0.115752	2.40919	2304	0
ERS451417_00028	1717.62.peg.25	NA	NA	NA	1	8	Cbelfantii_FRC0043,"Cdiphtheriae_NCTC11397","Cpseudotuberculosis_31","Cpseudotuberculosis_ATCC19410","Crouxii_FRC0190","Csilvaticum_KL0182","Culcerans_NCTC12077","Culcerans_NCTC7910"	0.148638	0.148638	3.37215	0.148638	0.148638	3.37214	2	1	1. 0.59405;2. 22;3. 64;4. 26;5. 23;6. 67;7. 23;8. 67;9. 52;10. D;11. GAC
ERS451417_00335	1717.62.peg.337	NA	NA	NA	1	36	Cargentoratense_DSM44202,"Catypicum_R2070","Caurimucosum_ATCC700975","Cbelfantii_FRC0043","Ccallunae_DSM20147","Ccamporealensis_DSM44610","Cdeserti_GIMN1010","Cdiphtheriae_NCTC11397","Cdoosanense_DSM45436","Cefficiens_YS314","Cepidermidicanis_DSM45586","Cglutamicum_ATCC13032","Cglycinophilum_AJ3170","Chalotolerans_YIM70093","Chumireducens_DSM45392","Cimitans_DSM44264","Cjeikeium_K41","Ckroppenste…	0.128455	0.128455	2.30679	0.128455	0.128455	2.30679	3330	0
ERS451417_01494	1717.62.peg.1502	NA	NA	NA	1	30	Catypicum_R2070,"Caurimucosum_ATCC700975","Cbelfantii_FRC0043","Ccallunae_DSM20147","Ccamporealensis_DSM44610","Cdeserti_GIMN1010","Cdiphtheriae_NCTC11397","Cdoosanense_DSM45436","Cefficiens_YS314","Cglutamicum_ATCC13032","Chalotolerans_YIM70093","Chumireducens_DSM45392","Cimitans_DSM44264","Ckutscheri_DSM20755","Clactis_RW25","Cmarinum_DSM44953","Cmaris_DSM45190","Cmustelae_DSM45274","Cpseudotub…	0.150477	0.144672	1.73435	0.150477	0.144672	1.73435	2050	1	1. 0.66879;2. 232;3. 694;4. 245;5. 236;6. 706;7. 241;8. 721;9. 526;10. T;11. ACC
ERS451417_00998	1717.62.peg.1009	NA	NA	NA	1	39	Cargentoratense_DSM44202,"Catypicum_R2070","Caurimucosum_ATCC700975","Cbelfantii_FRC0043","Ccallunae_DSM20147","Ccamporealensis_DSM44610","Cdeserti_GIMN1010","Cdiphtheriae_NCTC11397","Cdoosanense_DSM45436","Cefficiens_YS314","Cepidermidicanis_DSM45586","Cfalsenii_DSM44353","Cglutamicum_ATCC13032","Cglycinophilum_AJ3170","Chalotolerans_YIM70093","Chumireducens_DSM45392","Cimitans_DSM44264","Cjeike…	0.114205	0.114205	1.79323	0.114196	0.114196	1.79323	258	0
ERS451417_01747	1717.62.peg.1750	NA	NA	NA	1	28	Catypicum_R2070,"Caurimucosum_ATCC700975","Cbelfantii_FRC0043","Ccallunae_DSM20147","Ccamporealensis_DSM44610","Cdeserti_GIMN1010","Cdiphtheriae_NCTC11397","Cdoosanense_DSM45436","Cefficiens_YS314","Cepidermidicanis_DSM45586","Cglutamicum_ATCC13032","Chalotolerans_YIM70093","Chumireducens_DSM45392","Cimitans_DSM44264","Ckutscheri_DSM20755","Cmarinum_DSM44953","Cmaris_DSM45190","Cmustelae_DSM45274…	0.281759	0.281759	1.81549	0.281759	0.281759	1.81548	3330	0
ERS451417_01959	1717.62.peg.1959	NA	NA	NA	1	37	Cargentoratense_DSM44202,"Catypicum_R2070","Caurimucosum_ATCC700975","Cbelfantii_FRC0043","Ccallunae_DSM20147","Ccamporealensis_DSM44610","Cdeserti_GIMN1010","Cdiphtheriae_NCTC11397","Cdoosanense_DSM45436","Cefficiens_YS314","Cepidermidicanis_DSM45586","Cfalsenii_DSM44353","Cglutamicum_ATCC13032","Cglycinophilum_AJ3170","Chalotolerans_YIM70093","Chumireducens_DSM45392","Cimitans_DSM44264","Cjeike…	0.102122	0.102122	1.86958	0.102122	0.102122	1.86959	258	0
ERS451417_00794	1717.62.peg.800	NA	NA	NA	1	36	Cargentoratense_DSM44202,"Caurimucosum_ATCC700975","Cbelfantii_FRC0043","Ccallunae_DSM20147","Ccamporealensis_DSM44610","Cdeserti_GIMN1010","Cdiphtheriae_NCTC11397","Cdoosanense_DSM45436","Cefficiens_YS314","Cepidermidicanis_DSM45586","Cfalsenii_DSM44353","Cglutamicum_ATCC13032","Cglycinophilum_AJ3170","Chalotolerans_YIM70093","Chumireducens_DSM45392","Cimitans_DSM44264","Cjeikeium_K41","Ckutsche…	0.152989	0.152989	1.99375	0.152989	0.152989	1.99375	258	0
ERS451417_02354	1717.62.peg.2382	NA	NA	NA	1	24	Catypicum_R2070,"Caurimucosum_ATCC700975","Cbelfantii_FRC0043","Ccamporealensis_DSM44610","Cdiphtheriae_NCTC11397","Cdoosanense_DSM45436","Cglycinophilum_AJ3170","Chalotolerans_YIM70093","Chumireducens_DSM45392","Cimitans_DSM44264","Cmarinum_DSM44953","Cmaris_DSM45190","Cmustelae_DSM45274","Cpseudotuberculosis_31","Cpseudotuberculosis_ATCC19410","CriegeliiPUDD83A45","Csilvaticum_KL0182","Csimulan…	0.148154	0.148154	2.33014	0.148154	0.148154	2.33014	1282	0
ERS451417_00620	1717.62.peg.624	NA	NA	NA	1	32	Cargentoratense_DSM44202,"Catypicum_R2070","Cbelfantii_FRC0043","Ccallunae_DSM20147","Ccamporealensis_DSM44610","Cdeserti_GIMN1010","Cdiphtheriae_NCTC11397","Cdoosanense_DSM45436","Cepidermidicanis_DSM45586","Cfalsenii_DSM44353","Cglutamicum_ATCC13032","Chalotolerans_YIM70093","Chumireducens_DSM45392","Cimitans_DSM44264","Cjeikeium_K41","Ckroppenstedtii_DSM44385","Ckutscheri_DSM20755","Clactis_RW…	0.231089	0.231089	1.87466	0.231089	0.231089	1.87465	3330	0
ERS451417_01874	1717.62.peg.1876	NA	NA	NA	1	25	Cargentoratense_DSM44202,"Catypicum_R2070","Cbelfantii_FRC0043","Ccallunae_DSM20147","Cdeserti_GIMN1010","Cdiphtheriae_NCTC11397","Cefficiens_YS314","Cglutamicum_ATCC13032","Cglycinophilum_AJ3170","Chalotolerans_YIM70093","Chumireducens_DSM45392","Ckroppenstedtii_DSM44385","Clactis_RW25","Cmarinum_DSM44953","Cmaris_DSM45190","Cmustelae_DSM45274","Cpseudotuberculosis_31","Cpseudotuberculosis_ATCC1…	0.380631	0.313261	1.30595	0.380631	0.313261	1.30595	3074	1	1. 0.75135;2. 38;3. 112;4. 40;5. 40;6. 118;7. 47;8. 139;9. 76;10. D;11. GAT
ERS451417_01904	1717.62.peg.1899	NA	NA	NA	1	6	Cbelfantii_FRC0043,"Cdiphtheriae_NCTC11397","Ckutscheri_DSM20755","Cpseudotuberculosis_31","Cpseudotuberculosis_ATCC19410","Culcerans_NCTC7910"	0.126554	0.126554	2.77319	0.126554	0.126554	2.77319	4098	2	1. 0.40065;2. 156;3. 466;4. 165;5. 165;6. 493;7. 183;8. 547;9. 361;10. I;11. ATT	1. 0.41511;2. 166;3. 496;4. 175;5. 175;6. 523;7. 193;8. 577;9. 391;10. A;11. GCT
ERS451417_00728	1717.62.peg.731	NA	NA	NA	1	14	Cbelfantii_FRC0043,"Ccallunae_DSM20147","Cdeserti_GIMN1010","Cdiphtheriae_NCTC11397","Cefficiens_YS314","Cglutamicum_ATCC13032","Ckutscheri_DSM20755","Cpseudotuberculosis_31","Cpseudotuberculosis_ATCC19410","Crouxii_FRC0190","Csilvaticum_KL0182","Culcerans_NCTC12077","Culcerans_NCTC7910","Cvitaeruminis_DSM20294"	0.0872472	0.0872472	1.8229	0.0872472	0.0872472	1.82291	258	0
ERS451417_00392	1717.62.peg.392	NA	NA	NA	1	39	Cargentoratense_DSM44202,"Catypicum_R2070","Caurimucosum_ATCC700975","Cbelfantii_FRC0043","Ccallunae_DSM20147","Ccamporealensis_DSM44610","Cdeserti_GIMN1010","Cdiphtheriae_NCTC11397","Cdoosanense_DSM45436","Cefficiens_YS314","Cepidermidicanis_DSM45586","Cfalsenii_DSM44353","Cglutamicum_ATCC13032","Cglycinophilum_AJ3170","Chalotolerans_YIM70093","Chumireducens_DSM45392","Cimitans_DSM44264","Cjeike…	0.180765	0.180765	1.70134	0.180765	0.180765	1.70134	258	0
ERS451417_01348	1717.62.peg.1356	NA	NA	NA	1	38	Cargentoratense_DSM44202,"Catypicum_R2070","Caurimucosum_ATCC700975","Cbelfantii_FRC0043","Ccallunae_DSM20147","Ccamporealensis_DSM44610","Cdeserti_GIMN1010","Cdiphtheriae_NCTC11397","Cdoosanense_DSM45436","Cefficiens_YS314","Cepidermidicanis_DSM45586","Cfalsenii_DSM44353","Cglutamicum_ATCC13032","Cglycinophilum_AJ3170","Chalotolerans_YIM70093","Chumireducens_DSM45392","Cimitans_DSM44264","Cjeike…	0.179135	0.179135	1.49489	0.179135	0.179135	1.49489	3074	2	1. 0.53417;2. 184;3. 550;4. 228;5. 228;6. 682;7. 337;8. 1009;9. 298;10. D;11. GAT	1. 0.59873;2. 192;3. 574;4. 236;5. 236;6. 706;7. 345;8. 1033;9. 322;10. A;11. GCG
ERS451417_01308	1717.62.peg.1316	NA	NA	NA	1	38	Cargentoratense_DSM44202,"Catypicum_R2070","Caurimucosum_ATCC700975","Cbelfantii_FRC0043","Ccallunae_DSM20147","Ccamporealensis_DSM44610","Cdeserti_GIMN1010","Cdiphtheriae_NCTC11397","Cdoosanense_DSM45436","Cefficiens_YS314","Cepidermidicanis_DSM45586","Cfalsenii_DSM44353","Cglutamicum_ATCC13032","Cglycinophilum_AJ3170","Chalotolerans_YIM70093","Chumireducens_DSM45392","Cimitans_DSM44264","Cjeike…	0.148969	0.148969	1.5906	0.148969	0.148969	1.59059	258	0
ERS451417_00332	1717.62.peg.334	NA	NA	NA	1	39	Cargentoratense_DSM44202,"Catypicum_R2070","Caurimucosum_ATCC700975","Cbelfantii_FRC0043","Ccallunae_DSM20147","Ccamporealensis_DSM44610","Cdeserti_GIMN1010","Cdiphtheriae_NCTC11397","Cdoosanense_DSM45436","Cefficiens_YS314","Cepidermidicanis_DSM45586","Cfalsenii_DSM44353","Cglutamicum_ATCC13032","Cglycinophilum_AJ3170","Chalotolerans_YIM70093","Chumireducens_DSM45392","Cimitans_DSM44264","Cjeike…	0.186547	0.186547	1.77437	0.186547	0.186547	1.77437	1282	0
ERS451417_01977	1717.62.peg.1977	NA	NA	NA	1	38	Cargentoratense_DSM44202,"Catypicum_R2070","Caurimucosum_ATCC700975","Cbelfantii_FRC0043","Ccallunae_DSM20147","Ccamporealensis_DSM44610","Cdeserti_GIMN1010","Cdiphtheriae_NCTC11397","Cdoosanense_DSM45436","Cefficiens_YS314","Cepidermidicanis_DSM45586","Cfalsenii_DSM44353","Cglutamicum_ATCC13032","Cglycinophilum_AJ3170","Chalotolerans_YIM70093","Chumireducens_DSM45392","Cimitans_DSM44264","Cjeike…	0.101116	0.101116	2.20184	0.101116	0.101116	2.20183	3330	0
ERS451417_00118	1717.62.peg.116	NA	NA	NA	1	11	Cbelfantii_FRC0043,"Cdiphtheriae_NCTC11397","Cdoosanense_DSM45436","Chalotolerans_YIM70093","Cmarinum_DSM44953","Cpseudotuberculosis_31","Cpseudotuberculosis_ATCC19410","Csilvaticum_KL0182","Ctestudinoris_DSM44614","Culcerans_NCTC7910","Cvitaeruminis_DSM20294"	0.357215	0.357215	1.70418	0.357215	0.357215	1.70418	7426	0
ERS451417_01285	1717.62.peg.1293	NA	NA	NA	1	20	Cargentoratense_DSM44202,"Catypicum_R2070","Cbelfantii_FRC0043","Ccallunae_DSM20147","Cdeserti_GIMN1010","Cdiphtheriae_NCTC11397","Cglutamicum_ATCC13032","Chalotolerans_YIM70093","Chumireducens_DSM45392","Cimitans_DSM44264","Ckutscheri_DSM20755","Cmarinum_DSM44953","Cpseudotuberculosis_ATCC19410","CriegeliiPUDD83A45","Csilvaticum_KL0182","Ctestudinoris_DSM44614","Culcerans_NCTC12077","Culcerans_N…	0.273482	0.273482	1.66495	0.273482	0.273482	1.66495	2306	0
ERS451417_01650	1717.62.peg.1657	NA	NA	NA	1	37	Cargentoratense_DSM44202,"Catypicum_R2070","Caurimucosum_ATCC700975","Cbelfantii_FRC0043","Ccallunae_DSM20147","Ccamporealensis_DSM44610","Cdeserti_GIMN1010","Cdiphtheriae_NCTC11397","Cdoosanense_DSM45436","Cefficiens_YS314","Cepidermidicanis_DSM45586","Cfalsenii_DSM44353","Cglutamicum_ATCC13032","Cglycinophilum_AJ3170","Chalotolerans_YIM70093","Chumireducens_DSM45392","Cimitans_DSM44264","Cjeike…	0.230333	0.230333	1.67999	0.230333	0.230333	1.67998	3330	0
ERS451417_00486	1717.62.peg.489	NA	NA	NA	1	6	Cbelfantii_FRC0043,"Cdiphtheriae_NCTC11397","Cpseudotuberculosis_ATCC19410","Crouxii_FRC0190","Csilvaticum_KL0182","Culcerans_NCTC7910"	0.205497	0.205497	2.45252	0.205497	0.205497	2.45252	4098	4	1. 0.43065;2. 143;3. 427;4. 176;5. 150;6. 448;7. 150;8. 448;9. 397;10. I;11. ATT	1. 0.4385;2. 232;3. 694;4. 336;5. 247;6. 739;7. 255;8. 763;9. 625;10. A;11. GCG	1. 0.47648;2. 297;3. 889;4. 481;5. 312;6. 934;7. 320;8. 958;9. 820;10. L;11. CTA	1. 0.40199;2. 404;3. 1210;4. 632;5. 419;6. 1255;7. 439;8. 1315;9. 1069;10. E;11. GAA
ERS451417_00963	1717.62.peg.970	NA	NA	NA	1	39	Cargentoratense_DSM44202,"Catypicum_R2070","Caurimucosum_ATCC700975","Cbelfantii_FRC0043","Ccallunae_DSM20147","Ccamporealensis_DSM44610","Cdeserti_GIMN1010","Cdiphtheriae_NCTC11397","Cdoosanense_DSM45436","Cefficiens_YS314","Cepidermidicanis_DSM45586","Cfalsenii_DSM44353","Cglutamicum_ATCC13032","Cglycinophilum_AJ3170","Chalotolerans_YIM70093","Chumireducens_DSM45392","Cimitans_DSM44264","Cjeike…	0.225287	0.225287	2.1397	0.225287	0.225287	2.1397	2306	0
ERS451417_01858	1717.62.peg.1860	NA	NA	NA	1	38	Cargentoratense_DSM44202,"Catypicum_R2070","Caurimucosum_ATCC700975","Cbelfantii_FRC0043","Ccallunae_DSM20147","Ccamporealensis_DSM44610","Cdeserti_GIMN1010","Cdiphtheriae_NCTC11397","Cdoosanense_DSM45436","Cefficiens_YS314","Cepidermidicanis_DSM45586","Cfalsenii_DSM44353","Cglutamicum_ATCC13032","Cglycinophilum_AJ3170","Chalotolerans_YIM70093","Chumireducens_DSM45392","Cimitans_DSM44264","Cjeike…	0.172167	0.172167	1.88409	0.172167	0.172167	1.8841	1282	0
ERS451417_00179	1717.62.peg.175	NA	NA	NA	1	39	Cargentoratense_DSM44202,"Catypicum_R2070","Caurimucosum_ATCC700975","Cbelfantii_FRC0043","Ccallunae_DSM20147","Ccamporealensis_DSM44610","Cdeserti_GIMN1010","Cdiphtheriae_NCTC11397","Cdoosanense_DSM45436","Cefficiens_YS314","Cepidermidicanis_DSM45586","Cfalsenii_DSM44353","Cglutamicum_ATCC13032","Cglycinophilum_AJ3170","Chalotolerans_YIM70093","Chumireducens_DSM45392","Cimitans_DSM44264","Cjeike…	0.230152	0.230152	1.61502	0.230152	0.230152	1.61501	2	1	1. 0.57791;2. 290;3. 868;4. 330;5. 330;6. 988;7. 346;8. 1036;9. 793;10. L;11. CTC
ERS451417_00719	1717.62.peg.724	NA	NA	NA	1	34	Cargentoratense_DSM44202,"Caurimucosum_ATCC700975","Cbelfantii_FRC0043","Ccallunae_DSM20147","Ccamporealensis_DSM44610","Cdeserti_GIMN1010","Cdiphtheriae_NCTC11397","Cdoosanense_DSM45436","Cefficiens_YS314","Cepidermidicanis_DSM45586","Cfalsenii_DSM44353","Cglutamicum_ATCC13032","Cglycinophilum_AJ3170","Chalotolerans_YIM70093","Chumireducens_DSM45392","Cimitans_DSM44264","Clactis_RW25","Cmarinum_…	0.14514	0.14514	1.72679	0.145149	0.145149	1.72678	258	0
ERS451417_01056	1717.62.peg.1067	NA	NA	NA	1	38	Cargentoratense_DSM44202,"Catypicum_R2070","Caurimucosum_ATCC700975","Cbelfantii_FRC0043","Ccallunae_DSM20147","Ccamporealensis_DSM44610","Cdeserti_GIMN1010","Cdiphtheriae_NCTC11397","Cdoosanense_DSM45436","Cefficiens_YS314","Cepidermidicanis_DSM45586","Cfalsenii_DSM44353","Cglutamicum_ATCC13032","Cglycinophilum_AJ3170","Chalotolerans_YIM70093","Chumireducens_DSM45392","Cimitans_DSM44264","Cjeike…	0.125139	0.121326	1.79199	0.125139	0.121326	1.79199	1026	1	1. 0.71334;2. 75;3. 223;4. 95;5. 95;6. 283;7. 176;8. 526;9. 187;10. V;11. GTT
ERS451417_01759	1717.62.peg.1762	NA	NA	NA	1	30	Cargentoratense_DSM44202,"Caurimucosum_ATCC700975","Cbelfantii_FRC0043","Ccallunae_DSM20147","Ccamporealensis_DSM44610","Cdeserti_GIMN1010","Cdiphtheriae_NCTC11397","Cdoosanense_DSM45436","Cefficiens_YS314","Cepidermidicanis_DSM45586","Cglutamicum_ATCC13032","Chalotolerans_YIM70093","Chumireducens_DSM45392","Cimitans_DSM44264","Ckroppenstedtii_DSM44385","Ckutscheri_DSM20755","Cmarinum_DSM44953","…	0.13155	0.13155	1.61213	0.13155	0.13155	1.61212	7170	1	1. 0.57357;2. 264;3. 790;4. 274;5. 272;6. 814;7. 324;8. 970;9. 613;10. P;11. CCT
ERS451417_01260	1717.62.peg.1268	NA	NA	NA	1	4	Cdiphtheriae_NCTC11397,"Csilvaticum_KL0182","Culcerans_NCTC12077","Culcerans_NCTC7910"	0.427533	0.427533	2.00452	0.477859	0.419469	2.01115	2	2	1. 0.63106;2. 51;3. 151;4. 70;5. 51;6. 151;7. 54;8. 160;9. 121;10. L;11. CTT	1. 0.55207;2. 108;3. 322;4. 171;5. 114;6. 340;7. 117;8. 349;9. 259;10. S;11. AGC
ERS451417_00732	1717.62.peg.735	NA	NA	NA	1	39	Cargentoratense_DSM44202,"Catypicum_R2070","Caurimucosum_ATCC700975","Cbelfantii_FRC0043","Ccallunae_DSM20147","Ccamporealensis_DSM44610","Cdeserti_GIMN1010","Cdiphtheriae_NCTC11397","Cdoosanense_DSM45436","Cefficiens_YS314","Cepidermidicanis_DSM45586","Cfalsenii_DSM44353","Cglutamicum_ATCC13032","Cglycinophilum_AJ3170","Chalotolerans_YIM70093","Chumireducens_DSM45392","Cimitans_DSM44264","Cjeike…	0.177882	0.177882	1.71981	0.177882	0.177882	1.71981	258	0
ERS451417_01325	1717.62.peg.1333	NA	NA	NA	1	38	Cargentoratense_DSM44202,"Catypicum_R2070","Caurimucosum_ATCC700975","Cbelfantii_FRC0043","Ccallunae_DSM20147","Ccamporealensis_DSM44610","Cdeserti_GIMN1010","Cdiphtheriae_NCTC11397","Cdoosanense_DSM45436","Cefficiens_YS314","Cepidermidicanis_DSM45586","Cfalsenii_DSM44353","Cglutamicum_ATCC13032","Cglycinophilum_AJ3170","Chalotolerans_YIM70093","Chumireducens_DSM45392","Cimitans_DSM44264","Cjeike…	0.153535	0.153535	1.82583	0.153535	0.153535	1.82583	258	0
ERS451417_01230	1717.62.peg.1238	NA	NA	NA	1	15	Cargentoratense_DSM44202,"Cbelfantii_FRC0043","Cdiphtheriae_NCTC11397","Cepidermidicanis_DSM45586","Ckroppenstedtii_DSM44385","Ckutscheri_DSM20755","Clactis_RW25","Cmustelae_DSM45274","Cpseudotuberculosis_31","Cpseudotuberculosis_ATCC19410","Crouxii_FRC0190","Csilvaticum_KL0182","Culcerans_NCTC12077","Culcerans_NCTC7910","Cvitaeruminis_DSM20294"	0.138761	0.138761	2.18536	0.138761	0.138761	2.18536	2	2	1. 0.4538;2. 230;3. 688;4. 312;5. 294;6. 880;7. 315;8. 943;9. 544;10. A;11. GCA	1. 0.57425;2. 1098;3. 3292;4. 1217;5. 1183;6. 3547;7. 1271;8. 3811;9. 2953;10. V;11. GTA
ERS451417_01284	1717.62.peg.1292	NA	NA	NA	1	34	Cargentoratense_DSM44202,"Catypicum_R2070","Caurimucosum_ATCC700975","Cbelfantii_FRC0043","Ccallunae_DSM20147","Ccamporealensis_DSM44610","Cdeserti_GIMN1010","Cdiphtheriae_NCTC11397","Cdoosanense_DSM45436","Cefficiens_YS314","Cepidermidicanis_DSM45586","Cglutamicum_ATCC13032","Chalotolerans_YIM70093","Chumireducens_DSM45392","Cjeikeium_K41","Ckroppenstedtii_DSM44385","Ckutscheri_DSM20755","Clacti…	0.12052	0.12052	1.97401	0.12052	0.12052	1.97401	258	0
ERS451417_01232	1717.62.peg.1240	NA	NA	NA	1	15	Cargentoratense_DSM44202,"Cbelfantii_FRC0043","Cdiphtheriae_NCTC11397","Cepidermidicanis_DSM45586","Ckroppenstedtii_DSM44385","Ckutscheri_DSM20755","Clactis_RW25","Cmustelae_DSM45274","Cpseudotuberculosis_31","Cpseudotuberculosis_ATCC19410","Crouxii_FRC0190","Csilvaticum_KL0182","Culcerans_NCTC12077","Culcerans_NCTC7910","Cvitaeruminis_DSM20294"	0.226714	0.226714	2.17416	0.226714	0.226714	2.17416	258	0
ERS451417_00631	1717.62.peg.635	NA	NA	NA	1	14	Cargentoratense_DSM44202,"Cbelfantii_FRC0043","Ccallunae_DSM20147","Cdiphtheriae_NCTC11397","Cefficiens_YS314","Chalotolerans_YIM70093","Ckutscheri_DSM20755","Cmustelae_DSM45274","Cpseudotuberculosis_ATCC19410","Crouxii_FRC0190","Csilvaticum_KL0182","Ctestudinoris_DSM44614","Culcerans_NCTC7910","Cvitaeruminis_DSM20294"	0.0828317	0.0828317	1.78211	0.0828317	0.0828317	1.78211	6402	0
ERS451417_01459	1717.62.peg.1469	NA	NA	NA	1	30	Caurimucosum_ATCC700975,"Ccallunae_DSM20147","Ccamporealensis_DSM44610","Cdeserti_GIMN1010","Cdiphtheriae_NCTC11397","Cdoosanense_DSM45436","Cefficiens_YS314","Cepidermidicanis_DSM45586","Cfalsenii_DSM44353","Cglutamicum_ATCC13032","Cglycinophilum_AJ3170","Chalotolerans_YIM70093","Chumireducens_DSM45392","Cimitans_DSM44264","Ckroppenstedtii_DSM44385","Ckutscheri_DSM20755","Clactis_RW25","Cmarinum…	0.1731	0.1731	1.78302	0.1731	0.1731	1.78302	2	1	1. 0.58694;2. 323;3. 967;4. 346;5. 324;6. 970;7. 324;8. 970;9. 955;10. I;11. ATC
ERS451417_01582	1717.62.peg.1591	NA	NA	NA	1	37	Cargentoratense_DSM44202,"Catypicum_R2070","Caurimucosum_ATCC700975","Cbelfantii_FRC0043","Ccallunae_DSM20147","Ccamporealensis_DSM44610","Cdeserti_GIMN1010","Cdiphtheriae_NCTC11397","Cdoosanense_DSM45436","Cefficiens_YS314","Cepidermidicanis_DSM45586","Cfalsenii_DSM44353","Cglutamicum_ATCC13032","Cglycinophilum_AJ3170","Chalotolerans_YIM70093","Chumireducens_DSM45392","Cimitans_DSM44264","Cjeike…	0.14473	0.14473	1.63483	0.14473	0.14473	1.63484	1282	0
ERS451417_00495	1717.62.peg.498	NA	NA	NA	1	39	Cargentoratense_DSM44202,"Catypicum_R2070","Caurimucosum_ATCC700975","Cbelfantii_FRC0043","Ccallunae_DSM20147","Ccamporealensis_DSM44610","Cdeserti_GIMN1010","Cdiphtheriae_NCTC11397","Cdoosanense_DSM45436","Cefficiens_YS314","Cepidermidicanis_DSM45586","Cfalsenii_DSM44353","Cglutamicum_ATCC13032","Cglycinophilum_AJ3170","Chalotolerans_YIM70093","Chumireducens_DSM45392","Cimitans_DSM44264","Cjeike…	0.386448	0.147202	2.07607	0.247723	0.147202	2.07607	258	0
ERS451417_00182	1717.62.peg.178	NA	NA	NA	1	36	Cargentoratense_DSM44202,"Catypicum_R2070","Caurimucosum_ATCC700975","Cbelfantii_FRC0043","Ccallunae_DSM20147","Ccamporealensis_DSM44610","Cdeserti_GIMN1010","Cdiphtheriae_NCTC11397","Cdoosanense_DSM45436","Cefficiens_YS314","Cepidermidicanis_DSM45586","Cfalsenii_DSM44353","Cglutamicum_ATCC13032","Cglycinophilum_AJ3170","Chalotolerans_YIM70093","Chumireducens_DSM45392","Cjeikeium_K41","Ckroppenst…	0.250914	0.250914	1.32227	0.250914	0.250914	1.32227	1282	0
ERS451417_00873	1717.62.peg.879	NA	NA	NA	1	8	Cbelfantii_FRC0043,"Cdiphtheriae_NCTC11397","Cpseudotuberculosis_31","Cpseudotuberculosis_ATCC19410","Crouxii_FRC0190","Csilvaticum_KL0182","Culcerans_NCTC12077","Culcerans_NCTC7910"	0.0963069	0.0963069	2.55894	0.0963069	0.0963069	2.55894	2	7	1. 0.49173;2. 51;3. 151;4. 112;5. 87;6. 259;7. 89;8. 265;9. 82;10. T;11. ACC	1. 0.45144;2. 59;3. 175;4. 128;5. 95;6. 283;7. 97;8. 289;9. 106;10. I;11. ATA	1. 0.44947;2. 79;3. 235;4. 165;5. 115;6. 343;7. 117;8. 349;9. 166;10. G;11. GGA	1. 0.40613;2. 81;3. 241;4. 167;5. 117;6. 349;7. 119;8. 355;9. 172;10. K;11. AAG	1. 0.89131;2. 154;3. 460;4. 246;5. 190;6. 568;7. 192;8. 574;9. 391;10. V;11. GTA	1. 0.50079;2. 287;3. 859;4. 383;5. 323;6. 967;7. 325;8. 973;9. 790;10. Q;11. CAA	1. 0.44161;2. 364;3. 1090;4. 513;5. 400;6. 1198;7. 402;8. 1204;9. 1021;10. T;11. ACC
ERS451417_01934	1717.62.peg.1931	NA	NA	NA	1	22	Catypicum_R2070,"Caurimucosum_ATCC700975","Cbelfantii_FRC0043","Ccallunae_DSM20147","Ccamporealensis_DSM44610","Cdeserti_GIMN1010","Cdiphtheriae_NCTC11397","Cefficiens_YS314","Cglutamicum_ATCC13032","Chalotolerans_YIM70093","Chumireducens_DSM45392","Ckutscheri_DSM20755","Cmustelae_DSM45274","Cpseudotuberculosis_31","Cpseudotuberculosis_ATCC19410","Csilvaticum_KL0182","Csimulans_PES1","Csingulare_…	0.308946	0.308946	2.51963	0.308946	0.308946	2.51963	3330	0
ERS451417_00309	1717.62.peg.310	NA	NA	NA	1	27	Cargentoratense_DSM44202,"Catypicum_R2070","Cbelfantii_FRC0043","Ccallunae_DSM20147","Cdeserti_GIMN1010","Cdiphtheriae_NCTC11397","Cdoosanense_DSM45436","Cefficiens_YS314","Cfalsenii_DSM44353","Cglutamicum_ATCC13032","Cglycinophilum_AJ3170","Chumireducens_DSM45392","Cjeikeium_K41","Ckutscheri_DSM20755","Clactis_RW25","Cmarinum_DSM44953","Cmaris_DSM45190","Cmustelae_DSM45274","Cpseudotuberculosis_…	0.134592	0.134592	1.87367	0.134592	0.134592	1.87367	2	1	1. 0.61626;2. 102;3. 304;4. 152;5. 152;6. 454;7. 174;8. 520;9. 256;10. T;11. ACC
ERS451417_02361	1717.62.peg.2390	NA	NA	NA	1	12	Caurimucosum_ATCC700975,"Cbelfantii_FRC0043","Cdiphtheriae_NCTC11397","Ckroppenstedtii_DSM44385","Cpseudotuberculosis_31","Cpseudotuberculosis_ATCC19410","Csilvaticum_KL0182","Csimulans_PES1","Csingulare_IBSB52218","Culcerans_NCTC12077","Culcerans_NCTC7910","Cuterequi_DSM45634"	0.196167	0.196167	2.72674	0.196157	0.196157	2.72674	258	0
ERS451417_01054	1717.62.peg.1064	NA	NA	NA	1	39	Cargentoratense_DSM44202,"Catypicum_R2070","Caurimucosum_ATCC700975","Cbelfantii_FRC0043","Ccallunae_DSM20147","Ccamporealensis_DSM44610","Cdeserti_GIMN1010","Cdiphtheriae_NCTC11397","Cdoosanense_DSM45436","Cefficiens_YS314","Cepidermidicanis_DSM45586","Cfalsenii_DSM44353","Cglutamicum_ATCC13032","Cglycinophilum_AJ3170","Chalotolerans_YIM70093","Chumireducens_DSM45392","Cimitans_DSM44264","Cjeike…	0.271766	0.14538	1.41718	0.271766	0.14538	1.41718	3074	2	1. 0.75979;2. 25;3. 73;4. 33;5. 33;6. 97;7. 44;8. 130;9. 34;10. A;11. GCC	1. 0.73558;2. 29;3. 85;4. 37;5. 37;6. 109;7. 48;8. 142;9. 46;10. D;11. GAC
ERS451417_00336	1717.62.peg.338	NA	NA	NA	1	39	Cargentoratense_DSM44202,"Catypicum_R2070","Caurimucosum_ATCC700975","Cbelfantii_FRC0043","Ccallunae_DSM20147","Ccamporealensis_DSM44610","Cdeserti_GIMN1010","Cdiphtheriae_NCTC11397","Cdoosanense_DSM45436","Cefficiens_YS314","Cepidermidicanis_DSM45586","Cfalsenii_DSM44353","Cglutamicum_ATCC13032","Cglycinophilum_AJ3170","Chalotolerans_YIM70093","Chumireducens_DSM45392","Cimitans_DSM44264","Cjeike…	0.141156	0.141156	1.57296	0.141156	0.141156	1.57295	1026	1	1. 0.56305;2. 146;3. 436;4. 174;5. 174;6. 520;7. 210;8. 628;9. 310;10. Q;11. CAG
ERS451417_01234	1717.62.peg.1242	NA	NA	NA	1	15	Cargentoratense_DSM44202,"Cbelfantii_FRC0043","Cdiphtheriae_NCTC11397","Cepidermidicanis_DSM45586","Ckroppenstedtii_DSM44385","Ckutscheri_DSM20755","Clactis_RW25","Cmustelae_DSM45274","Cpseudotuberculosis_31","Cpseudotuberculosis_ATCC19410","Crouxii_FRC0190","Csilvaticum_KL0182","Culcerans_NCTC12077","Culcerans_NCTC7910","Cvitaeruminis_DSM20294"	0.177082	0.177082	2.35785	0.177082	0.177082	2.35783	258	0
ERS451417_00461	1717.62.peg.465	NA	NA	NA	1	39	Cargentoratense_DSM44202,"Catypicum_R2070","Caurimucosum_ATCC700975","Cbelfantii_FRC0043","Ccallunae_DSM20147","Ccamporealensis_DSM44610","Cdeserti_GIMN1010","Cdiphtheriae_NCTC11397","Cdoosanense_DSM45436","Cefficiens_YS314","Cepidermidicanis_DSM45586","Cfalsenii_DSM44353","Cglutamicum_ATCC13032","Cglycinophilum_AJ3170","Chalotolerans_YIM70093","Chumireducens_DSM45392","Cimitans_DSM44264","Cjeike…	0.734797	0.432082	1.73657	0.540685	0.432081	1.73657	258	0
ERS451417_02022	1717.62.peg.2027	NA	NA	NA	1	38	Cargentoratense_DSM44202,"Catypicum_R2070","Caurimucosum_ATCC700975","Cbelfantii_FRC0043","Ccallunae_DSM20147","Ccamporealensis_DSM44610","Cdeserti_GIMN1010","Cdiphtheriae_NCTC11397","Cdoosanense_DSM45436","Cefficiens_YS314","Cepidermidicanis_DSM45586","Cfalsenii_DSM44353","Cglutamicum_ATCC13032","Cglycinophilum_AJ3170","Chalotolerans_YIM70093","Chumireducens_DSM45392","Cimitans_DSM44264","Cjeike…	0.136098	0.136098	1.88219	0.136098	0.136098	1.88219	258	0
ERS451417_01037	1717.62.peg.1047	NA	NA	NA	1	32	Caurimucosum_ATCC700975,"Cbelfantii_FRC0043","Ccallunae_DSM20147","Ccamporealensis_DSM44610","Cdeserti_GIMN1010","Cdiphtheriae_NCTC11397","Cdoosanense_DSM45436","Cefficiens_YS314","Cfalsenii_DSM44353","Cglutamicum_ATCC13032","Cglycinophilum_AJ3170","Chalotolerans_YIM70093","Chumireducens_DSM45392","Cimitans_DSM44264","Cjeikeium_K41","Ckutscheri_DSM20755","Clactis_RW25","Cmarinum_DSM44953","Cmaris…	0.244615	0.244615	1.62319	0.244615	0.244615	1.62319	3330	0
ERS451417_02000	1717.62.peg.2004	NA	NA	NA	1	7	Cbelfantii_FRC0043,"Cdiphtheriae_NCTC11397","Cpseudotuberculosis_31","Cpseudotuberculosis_ATCC19410","Csilvaticum_KL0182","Culcerans_NCTC12077","Culcerans_NCTC7910"	0.193967	0.193967	3.76689	0.193967	0.193967	3.76689	2	2	1. 0.41714;2. 35;3. 103;4. 35;5. 35;6. 103;7. 35;8. 103;9. 103;10. A;11. GCA	1. 0.42066;2. 68;3. 202;4. 68;5. 68;6. 202;7. 68;8. 202;9. 202;10. R;11. CGC
ERS451417_01780	1717.62.peg.1784	NA	NA	NA	1	38	Cargentoratense_DSM44202,"Catypicum_R2070","Caurimucosum_ATCC700975","Cbelfantii_FRC0043","Ccallunae_DSM20147","Ccamporealensis_DSM44610","Cdeserti_GIMN1010","Cdiphtheriae_NCTC11397","Cdoosanense_DSM45436","Cefficiens_YS314","Cepidermidicanis_DSM45586","Cfalsenii_DSM44353","Cglutamicum_ATCC13032","Cglycinophilum_AJ3170","Chalotolerans_YIM70093","Chumireducens_DSM45392","Cimitans_DSM44264","Cjeike…	0.078564	0.078564	1.9956	0.078564	0.078564	1.9956	2	1	1. 0.47064;2. 410;3. 1228;4. 422;5. 422;6. 1264;7. 444;8. 1330;9. 1171;10. A;11. GCA
ERS451417_01950	1717.62.peg.1950	NA	NA	NA	1	38	Cargentoratense_DSM44202,"Catypicum_R2070","Caurimucosum_ATCC700975","Cbelfantii_FRC0043","Ccallunae_DSM20147","Ccamporealensis_DSM44610","Cdeserti_GIMN1010","Cdiphtheriae_NCTC11397","Cdoosanense_DSM45436","Cefficiens_YS314","Cepidermidicanis_DSM45586","Cfalsenii_DSM44353","Cglutamicum_ATCC13032","Cglycinophilum_AJ3170","Chalotolerans_YIM70093","Chumireducens_DSM45392","Cimitans_DSM44264","Cjeike…	0.148927	0.148927	1.59943	0.148927	0.148927	1.59942	258	0
ERS451417_01010	1717.62.peg.1021	NA	NA	NA	1	39	Cargentoratense_DSM44202,"Catypicum_R2070","Caurimucosum_ATCC700975","Cbelfantii_FRC0043","Ccallunae_DSM20147","Ccamporealensis_DSM44610","Cdeserti_GIMN1010","Cdiphtheriae_NCTC11397","Cdoosanense_DSM45436","Cefficiens_YS314","Cepidermidicanis_DSM45586","Cfalsenii_DSM44353","Cglutamicum_ATCC13032","Cglycinophilum_AJ3170","Chalotolerans_YIM70093","Chumireducens_DSM45392","Cimitans_DSM44264","Cjeike…	0.201184	0.201184	1.88524	0.201184	0.201184	1.88524	258	0
ERS451417_00254	1717.62.peg.249	NA	NA	NA	1	8	Cargentoratense_DSM44202,"Cbelfantii_FRC0043","Cdiphtheriae_NCTC11397","Cmustelae_DSM45274","Cpseudotuberculosis_ATCC19410","Crouxii_FRC0190","Culcerans_NCTC12077","Culcerans_NCTC7910"	0.114997	0.114997	2.7537	0.114997	0.114997	2.7537	2	5	1. 0.45135;2. 120;3. 358;4. 134;5. 134;6. 400;7. 138;8. 412;9. 268;10. I;11. ATC	1. 0.61127;2. 238;3. 712;4. 252;5. 252;6. 754;7. 256;8. 766;9. 601;10. F;11. TTT	1. 0.62317;2. 414;3. 1240;4. 430;5. 430;6. 1288;7. 441;8. 1321;9. 1048;10. L;11. TTA	1. 0.66549;2. 418;3. 1252;4. 434;5. 434;6. 1300;7. 445;8. 1333;9. 1060;10. V;11. GTG	1. 0.70258;2. 462;3. 1384;4. 478;5. 478;6. 1432;7. 489;8. 1465;9. 1192;10. S;11. TCC
ERS451417_00508	1717.62.peg.512	NA	NA	NA	1	34	Cargentoratense_DSM44202,"Catypicum_R2070","Caurimucosum_ATCC700975","Cbelfantii_FRC0043","Ccallunae_DSM20147","Ccamporealensis_DSM44610","Cdeserti_GIMN1010","Cdiphtheriae_NCTC11397","Cdoosanense_DSM45436","Cefficiens_YS314","Cepidermidicanis_DSM45586","Cglutamicum_ATCC13032","Chalotolerans_YIM70093","Chumireducens_DSM45392","Cimitans_DSM44264","Ckroppenstedtii_DSM44385","Ckutscheri_DSM20755","Cl…	0.125731	0.125731	1.97919	0.125731	0.125731	1.97919	2306	0
ERS451417_00187	1717.62.peg.183	NA	NA	NA	1	10	Cbelfantii_FRC0043,"Cdiphtheriae_NCTC11397","Cepidermidicanis_DSM45586","Cimitans_DSM44264","Cjeikeium_K41","Cmaris_DSM45190","Crouxii_FRC0190","Csilvaticum_KL0182","Culcerans_NCTC12077","Culcerans_NCTC7910"	0.301936	0.142268	2.2282	0.301936	0.142268	2.2282	2050	1	1. 0.84726;2. 38;3. 112;4. 69;5. 43;6. 127;7. 78;8. 232;9. 10;10. I;11. ATC
ERS451417_01795	1717.62.peg.1800	NA	NA	NA	1	38	Cargentoratense_DSM44202,"Catypicum_R2070","Caurimucosum_ATCC700975","Cbelfantii_FRC0043","Ccallunae_DSM20147","Ccamporealensis_DSM44610","Cdeserti_GIMN1010","Cdiphtheriae_NCTC11397","Cdoosanense_DSM45436","Cefficiens_YS314","Cepidermidicanis_DSM45586","Cfalsenii_DSM44353","Cglutamicum_ATCC13032","Cglycinophilum_AJ3170","Chalotolerans_YIM70093","Chumireducens_DSM45392","Cimitans_DSM44264","Cjeike…	0.134338	0.134338	1.9841	0.134338	0.134338	1.9841	2306	0
ERS451417_02374	1717.62.peg.2404	NA	NA	NA	1	12	Cbelfantii_FRC0043,"Cdiphtheriae_NCTC11397","Cdoosanense_DSM45436","Chalotolerans_YIM70093","Chumireducens_DSM45392","Cmarinum_DSM44953","Cmaris_DSM45190","Cpseudotuberculosis_ATCC19410","Csilvaticum_KL0182","Culcerans_NCTC12077","Culcerans_NCTC7910","Cvitaeruminis_DSM20294"	43.8147	0.195226	2.07486	1	0.196434	2.09246	3328	0
ERS451417_01359	1717.62.peg.1367	NA	NA	NA	1	7	Cbelfantii_FRC0043,"Cdiphtheriae_NCTC11397","Cpseudotuberculosis_31","Cpseudotuberculosis_ATCC19410","Csilvaticum_KL0182","Culcerans_NCTC12077","Culcerans_NCTC7910"	0.180551	0.180551	4.18818	0.180551	0.180551	4.18817	258	0
ERS451417_00393	1717.62.peg.393	NA	NA	NA	1	39	Cargentoratense_DSM44202,"Catypicum_R2070","Caurimucosum_ATCC700975","Cbelfantii_FRC0043","Ccallunae_DSM20147","Ccamporealensis_DSM44610","Cdeserti_GIMN1010","Cdiphtheriae_NCTC11397","Cdoosanense_DSM45436","Cefficiens_YS314","Cepidermidicanis_DSM45586","Cfalsenii_DSM44353","Cglutamicum_ATCC13032","Cglycinophilum_AJ3170","Chalotolerans_YIM70093","Chumireducens_DSM45392","Cimitans_DSM44264","Cjeike…	0.145821	0.145821	1.81737	0.145821	0.145821	1.81739	258	0
ERS451417_00399	1717.62.peg.399	NA	NA	NA	1	39	Cargentoratense_DSM44202,"Catypicum_R2070","Caurimucosum_ATCC700975","Cbelfantii_FRC0043","Ccallunae_DSM20147","Ccamporealensis_DSM44610","Cdeserti_GIMN1010","Cdiphtheriae_NCTC11397","Cdoosanense_DSM45436","Cefficiens_YS314","Cepidermidicanis_DSM45586","Cfalsenii_DSM44353","Cglutamicum_ATCC13032","Cglycinophilum_AJ3170","Chalotolerans_YIM70093","Chumireducens_DSM45392","Cimitans_DSM44264","Cjeike…	0.151	0.151	1.8577	0.151	0.151	1.85772	258	0
ERS451417_00852	1717.62.peg.857	NA	NA	NA	1	39	Cargentoratense_DSM44202,"Catypicum_R2070","Caurimucosum_ATCC700975","Cbelfantii_FRC0043","Ccallunae_DSM20147","Ccamporealensis_DSM44610","Cdeserti_GIMN1010","Cdiphtheriae_NCTC11397","Cdoosanense_DSM45436","Cefficiens_YS314","Cepidermidicanis_DSM45586","Cfalsenii_DSM44353","Cglutamicum_ATCC13032","Cglycinophilum_AJ3170","Chalotolerans_YIM70093","Chumireducens_DSM45392","Cimitans_DSM44264","Cjeike…	0.125867	0.125867	1.79512	0.125867	0.125867	1.79511	258	0
ERS451417_00526	1717.62.peg.529	NA	NA	NA	1	39	Cargentoratense_DSM44202,"Catypicum_R2070","Caurimucosum_ATCC700975","Cbelfantii_FRC0043","Ccallunae_DSM20147","Ccamporealensis_DSM44610","Cdeserti_GIMN1010","Cdiphtheriae_NCTC11397","Cdoosanense_DSM45436","Cefficiens_YS314","Cepidermidicanis_DSM45586","Cfalsenii_DSM44353","Cglutamicum_ATCC13032","Cglycinophilum_AJ3170","Chalotolerans_YIM70093","Chumireducens_DSM45392","Cimitans_DSM44264","Cjeike…	0.126173	0.126173	2.41435	0.126173	0.126173	2.41436	258	0
ERS451417_00647	1717.62.peg.652	NA	NA	NA	1	16	Cbelfantii_FRC0043,"Ccallunae_DSM20147","Cdeserti_GIMN1010","Cdiphtheriae_NCTC11397","Cefficiens_YS314","Cglutamicum_ATCC13032","Chalotolerans_YIM70093","Ckutscheri_DSM20755","Cmustelae_DSM45274","Cpseudotuberculosis_31","Cpseudotuberculosis_ATCC19410","Crouxii_FRC0190","Csilvaticum_KL0182","Culcerans_NCTC12077","Culcerans_NCTC7910","Cvitaeruminis_DSM20294"	0.112985	0.112985	2.14912	0.112985	0.112985	2.14912	2	1	1. 0.64301;2. 30;3. 88;4. 60;5. 39;6. 115;7. 38;8. 112;9. 25;10. I;11. ATT
ERS451417_01558	1717.62.peg.1567	NA	NA	NA	1	38	Cargentoratense_DSM44202,"Catypicum_R2070","Caurimucosum_ATCC700975","Cbelfantii_FRC0043","Ccallunae_DSM20147","Ccamporealensis_DSM44610","Cdeserti_GIMN1010","Cdiphtheriae_NCTC11397","Cdoosanense_DSM45436","Cefficiens_YS314","Cepidermidicanis_DSM45586","Cfalsenii_DSM44353","Cglutamicum_ATCC13032","Cglycinophilum_AJ3170","Chalotolerans_YIM70093","Chumireducens_DSM45392","Cimitans_DSM44264","Cjeike…	0.218104	0.218104	1.5827	0.218104	0.218104	1.5827	1282	0
ERS451417_01495	1717.62.peg.1503	NA	NA	NA	1	37	Cargentoratense_DSM44202,"Catypicum_R2070","Caurimucosum_ATCC700975","Cbelfantii_FRC0043","Ccallunae_DSM20147","Ccamporealensis_DSM44610","Cdeserti_GIMN1010","Cdiphtheriae_NCTC11397","Cdoosanense_DSM45436","Cefficiens_YS314","Cepidermidicanis_DSM45586","Cfalsenii_DSM44353","Cglutamicum_ATCC13032","Cglycinophilum_AJ3170","Chalotolerans_YIM70093","Chumireducens_DSM45392","Cimitans_DSM44264","Cjeike…	0.25083	0.25083	1.62826	0.25083	0.25083	1.62827	3330	0
ERS451417_00077	1717.62.peg.74	NA	NA	NA	1	35	Cargentoratense_DSM44202,"Caurimucosum_ATCC700975","Cbelfantii_FRC0043","Ccallunae_DSM20147","Cdeserti_GIMN1010","Cdiphtheriae_NCTC11397","Cdoosanense_DSM45436","Cefficiens_YS314","Cepidermidicanis_DSM45586","Cfalsenii_DSM44353","Cglutamicum_ATCC13032","Cglycinophilum_AJ3170","Chalotolerans_YIM70093","Chumireducens_DSM45392","Cimitans_DSM44264","Cjeikeium_K41","Ckroppenstedtii_DSM44385","Ckutsche…	0.121519	0.121519	1.94987	0.121519	0.121519	1.94988	2	1	1. 0.71784;2. 276;3. 826;4. 287;5. 287;6. 859;7. 368;8. 1102;9. 739;10. R;11. CGC
ERS451417_02005	1717.62.peg.2009	NA	NA	NA	1	13	Caurimucosum_ATCC700975,"Cbelfantii_FRC0043","Cdiphtheriae_NCTC11397","Cglycinophilum_AJ3170","Cjeikeium_K41","Cpseudotuberculosis_31","Cpseudotuberculosis_ATCC19410","Csilvaticum_KL0182","Csimulans_PES1","Csingulare_IBSB52218","Culcerans_NCTC12077","Culcerans_NCTC7910","Curealyticum_DSM7109"	0.284886	0.143403	1.99166	0.284886	0.143403	1.99166	3074	1	1. 0.8427;2. 118;3. 352;4. 154;5. 121;6. 361;7. 140;8. 418;9. 259;10. V;11. GTG
ERS451417_01788	1717.62.peg.1793	NA	NA	NA	1	31	Cargentoratense_DSM44202,"Catypicum_R2070","Caurimucosum_ATCC700975","Cbelfantii_FRC0043","Ccallunae_DSM20147","Ccamporealensis_DSM44610","Cdeserti_GIMN1010","Cdiphtheriae_NCTC11397","Cdoosanense_DSM45436","Cefficiens_YS314","Cepidermidicanis_DSM45586","Cglutamicum_ATCC13032","Chalotolerans_YIM70093","Chumireducens_DSM45392","Cimitans_DSM44264","Ckutscheri_DSM20755","Cmarinum_DSM44953","Cmaris_DS…	0.151324	0.151324	1.74737	0.151324	0.151324	1.74737	1026	1	1. 0.49437;2. 134;3. 400;4. 229;5. 143;6. 427;7. 152;8. 454;9. 355;10. E;11. GAA
ERS451417_01740	1717.62.peg.1744	NA	NA	NA	1	6	Cdiphtheriae_NCTC11397,"Cpseudotuberculosis_31","Cpseudotuberculosis_ATCC19410","Csilvaticum_KL0182","Culcerans_NCTC12077","Culcerans_NCTC7910"	0.201592	0.201592	2.74272	0.201592	0.201592	2.74272	2050	1	1. 0.4738;2. 852;3. 2554;4. 1177;5. 903;6. 2707;7. 956;8. 2866;9. 1987;10. V;11. GTT
ERS451417_00768	1717.62.peg.773	NA	NA	NA	1	39	Cargentoratense_DSM44202,"Catypicum_R2070","Caurimucosum_ATCC700975","Cbelfantii_FRC0043","Ccallunae_DSM20147","Ccamporealensis_DSM44610","Cdeserti_GIMN1010","Cdiphtheriae_NCTC11397","Cdoosanense_DSM45436","Cefficiens_YS314","Cepidermidicanis_DSM45586","Cfalsenii_DSM44353","Cglutamicum_ATCC13032","Cglycinophilum_AJ3170","Chalotolerans_YIM70093","Chumireducens_DSM45392","Cimitans_DSM44264","Cjeike…	0.0685201	0.0685201	2.05437	0.0685201	0.0685201	2.05437	1282	0
ERS451417_01324	1717.62.peg.1332	NA	NA	NA	1	37	Cargentoratense_DSM44202,"Catypicum_R2070","Caurimucosum_ATCC700975","Cbelfantii_FRC0043","Ccallunae_DSM20147","Ccamporealensis_DSM44610","Cdeserti_GIMN1010","Cdiphtheriae_NCTC11397","Cdoosanense_DSM45436","Cefficiens_YS314","Cepidermidicanis_DSM45586","Cfalsenii_DSM44353","Cglutamicum_ATCC13032","Cglycinophilum_AJ3170","Chalotolerans_YIM70093","Chumireducens_DSM45392","Cimitans_DSM44264","Cjeike…	0.207663	0.207663	1.77866	0.207663	0.207663	1.77866	3074	2	1. 0.61081;2. 179;3. 535;4. 233;5. 211;6. 631;7. 279;8. 835;9. 343;10. A;11. GCA	1. 0.59658;2. 246;3. 736;4. 301;5. 279;6. 835;7. 348;8. 1042;9. 517;10. V;11. GTT
ERS451417_01928	1717.62.peg.1925	NA	NA	NA	1	38	Cargentoratense_DSM44202,"Catypicum_R2070","Caurimucosum_ATCC700975","Cbelfantii_FRC0043","Ccallunae_DSM20147","Ccamporealensis_DSM44610","Cdeserti_GIMN1010","Cdiphtheriae_NCTC11397","Cdoosanense_DSM45436","Cefficiens_YS314","Cepidermidicanis_DSM45586","Cfalsenii_DSM44353","Cglutamicum_ATCC13032","Cglycinophilum_AJ3170","Chalotolerans_YIM70093","Chumireducens_DSM45392","Cimitans_DSM44264","Cjeike…	0.106171	0.106171	1.67338	0.106171	0.106171	1.67337	1282	0
ERS451417_01585	1717.62.peg.1594	NA	NA	NA	1	6	Cdiphtheriae_NCTC11397,"Cpseudotuberculosis_31","Cpseudotuberculosis_ATCC19410","Culcerans_NCTC12077","Culcerans_NCTC7910","Cvitaeruminis_DSM20294"	0.0701	0.0701	3.13463	0.0701	0.0701	3.13463	2306	0
ERS451417_00795	1717.62.peg.801	NA	NA	NA	1	30	Caurimucosum_ATCC700975,"Cbelfantii_FRC0043","Ccallunae_DSM20147","Cdeserti_GIMN1010","Cdiphtheriae_NCTC11397","Cdoosanense_DSM45436","Cepidermidicanis_DSM45586","Cglutamicum_ATCC13032","Cglycinophilum_AJ3170","Chalotolerans_YIM70093","Chumireducens_DSM45392","Cimitans_DSM44264","Ckutscheri_DSM20755","Cmarinum_DSM44953","Cmaris_DSM45190","Cmustelae_DSM45274","Cpseudotuberculosis_31","Cpseudotuber…	0.279357	0.279357	1.92638	0.279348	0.279348	1.92638	258	0
ERS451417_00387	1717.62.peg.387	NA	NA	NA	1	11	Cbelfantii_FRC0043,"Cdiphtheriae_NCTC11397","Cepidermidicanis_DSM45586","Cmarinum_DSM44953","Cpseudotuberculosis_31","Cpseudotuberculosis_ATCC19410","Crouxii_FRC0190","Csilvaticum_KL0182","Ctestudinoris_DSM44614","Culcerans_NCTC12077","Culcerans_NCTC7910"	0.284245	0.284245	1.72998	0.284245	0.284245	1.72998	1026	1	1. 0.6483;2. 30;3. 88;4. 129;5. 73;6. 217;7. 80;8. 238;9. 64;10. G;11. GGG
ERS451417_01213	1717.62.peg.1221	NA	NA	NA	1	10	Cbelfantii_FRC0043,"Cdiphtheriae_NCTC11397","Ckutscheri_DSM20755","Cpseudotuberculosis_31","Cpseudotuberculosis_ATCC19410","Crouxii_FRC0190","Csilvaticum_KL0182","Culcerans_NCTC12077","Culcerans_NCTC7910","Cvitaeruminis_DSM20294"	0.131204	0.131204	2.84722	0.131204	0.131204	2.84722	258	0
ERS451417_00645	1717.62.peg.649	NA	NA	NA	1	8	Cbelfantii_FRC0043,"Cdiphtheriae_NCTC11397","Ckutscheri_DSM20755","Cpseudotuberculosis_ATCC19410","Crouxii_FRC0190","Csilvaticum_KL0182","Culcerans_NCTC7910","Cvitaeruminis_DSM20294"	0.0532011	0.00893	2.91033	0.0532011	0.00893	2.91033	4354	0
ERS451417_01658	1717.62.peg.1665	NA	NA	NA	1	24	Cargentoratense_DSM44202,"Cbelfantii_FRC0043","Ccallunae_DSM20147","Cdeserti_GIMN1010","Cdiphtheriae_NCTC11397","Cdoosanense_DSM45436","Cefficiens_YS314","Cepidermidicanis_DSM45586","Cglutamicum_ATCC13032","Chalotolerans_YIM70093","Chumireducens_DSM45392","Ckroppenstedtii_DSM44385","Ckutscheri_DSM20755","Clactis_RW25","Cmarinum_DSM44953","Cmaris_DSM45190","Cmustelae_DSM45274","Cpseudotuberculosis…	0.191627	0.191627	1.70529	0.191627	0.191627	1.70529	1026	2	1. 0.40036;2. 71;3. 211;4. 101;5. 96;6. 286;7. 116;8. 346;9. 97;10. I;11. ATC	1. 0.41015;2. 142;3. 424;4. 180;5. 167;6. 499;7. 187;8. 559;9. 310;10. E;11. GAA
ERS451417_00140	1717.62.peg.139	NA	NA	NA	1	39	Cargentoratense_DSM44202,"Catypicum_R2070","Caurimucosum_ATCC700975","Cbelfantii_FRC0043","Ccallunae_DSM20147","Ccamporealensis_DSM44610","Cdeserti_GIMN1010","Cdiphtheriae_NCTC11397","Cdoosanense_DSM45436","Cefficiens_YS314","Cepidermidicanis_DSM45586","Cfalsenii_DSM44353","Cglutamicum_ATCC13032","Cglycinophilum_AJ3170","Chalotolerans_YIM70093","Chumireducens_DSM45392","Cimitans_DSM44264","Cjeike…	0.0568239	0.0568239	2.22648	0.0568239	0.0568239	2.22649	1282	0
ERS451417_00754	1717.62.peg.759	NA	NA	NA	1	39	Cargentoratense_DSM44202,"Catypicum_R2070","Caurimucosum_ATCC700975","Cbelfantii_FRC0043","Ccallunae_DSM20147","Ccamporealensis_DSM44610","Cdeserti_GIMN1010","Cdiphtheriae_NCTC11397","Cdoosanense_DSM45436","Cefficiens_YS314","Cepidermidicanis_DSM45586","Cfalsenii_DSM44353","Cglutamicum_ATCC13032","Cglycinophilum_AJ3170","Chalotolerans_YIM70093","Chumireducens_DSM45392","Cimitans_DSM44264","Cjeike…	0.648804	0.131443	2.08624	0.233058	0.131433	2.08625	258	0
ERS451417_01531	1717.62.peg.1540	NA	NA	NA	1	38	Cargentoratense_DSM44202,"Catypicum_R2070","Caurimucosum_ATCC700975","Cbelfantii_FRC0043","Ccallunae_DSM20147","Ccamporealensis_DSM44610","Cdeserti_GIMN1010","Cdiphtheriae_NCTC11397","Cdoosanense_DSM45436","Cefficiens_YS314","Cepidermidicanis_DSM45586","Cfalsenii_DSM44353","Cglutamicum_ATCC13032","Cglycinophilum_AJ3170","Chalotolerans_YIM70093","Chumireducens_DSM45392","Cimitans_DSM44264","Cjeike…	0.119429	0.119429	1.8806	0.119429	0.119429	1.8806	258	0
ERS451417_00600	1717.62.peg.604	NA	NA	NA	1	39	Cargentoratense_DSM44202,"Catypicum_R2070","Caurimucosum_ATCC700975","Cbelfantii_FRC0043","Ccallunae_DSM20147","Ccamporealensis_DSM44610","Cdeserti_GIMN1010","Cdiphtheriae_NCTC11397","Cdoosanense_DSM45436","Cefficiens_YS314","Cepidermidicanis_DSM45586","Cfalsenii_DSM44353","Cglutamicum_ATCC13032","Cglycinophilum_AJ3170","Chalotolerans_YIM70093","Chumireducens_DSM45392","Cimitans_DSM44264","Cjeike…	0.103186	0.103186	1.965	0.103186	0.103186	1.96499	3330	0
ERS451417_01345	1717.62.peg.1353	NA	NA	NA	1	38	Cargentoratense_DSM44202,"Catypicum_R2070","Caurimucosum_ATCC700975","Cbelfantii_FRC0043","Ccallunae_DSM20147","Ccamporealensis_DSM44610","Cdeserti_GIMN1010","Cdiphtheriae_NCTC11397","Cdoosanense_DSM45436","Cefficiens_YS314","Cepidermidicanis_DSM45586","Cfalsenii_DSM44353","Cglutamicum_ATCC13032","Cglycinophilum_AJ3170","Chalotolerans_YIM70093","Chumireducens_DSM45392","Cimitans_DSM44264","Cjeike…	0.143881	0.143881	1.73145	0.143881	0.143881	1.73145	3330	0
ERS451417_01697	1717.62.peg.1704	NA	NA	NA	1	15	Cargentoratense_DSM44202,"Cbelfantii_FRC0043","Cdiphtheriae_NCTC11397","Cefficiens_YS314","Cepidermidicanis_DSM45586","Ckroppenstedtii_DSM44385","Ckutscheri_DSM20755","Clactis_RW25","Cmustelae_DSM45274","Cpseudotuberculosis_31","Cpseudotuberculosis_ATCC19410","Csilvaticum_KL0182","Culcerans_NCTC12077","Culcerans_NCTC7910","Cvitaeruminis_DSM20294"	0.328326	0.328326	2.1569	0.328316	0.328316	2.1569	3330	0
ERS451417_00494	1717.62.peg.497	NA	NA	NA	1	38	Cargentoratense_DSM44202,"Catypicum_R2070","Caurimucosum_ATCC700975","Cbelfantii_FRC0043","Ccallunae_DSM20147","Ccamporealensis_DSM44610","Cdeserti_GIMN1010","Cdiphtheriae_NCTC11397","Cdoosanense_DSM45436","Cefficiens_YS314","Cepidermidicanis_DSM45586","Cfalsenii_DSM44353","Cglutamicum_ATCC13032","Cglycinophilum_AJ3170","Chalotolerans_YIM70093","Chumireducens_DSM45392","Cimitans_DSM44264","Cjeike…	0.413189	0.311551	1.26532	0.413189	0.311551	1.26532	2	1	1. 0.79955;2. 25;3. 73;4. 27;5. 27;6. 79;7. 27;8. 79;9. 64;10. I;11. ATC
ERS451417_00970	1717.62.peg.978	NA	NA	NA	1	11	Cbelfantii_FRC0043,"Cdiphtheriae_NCTC11397","Cepidermidicanis_DSM45586","Ckutscheri_DSM20755","Cpseudotuberculosis_31","Cpseudotuberculosis_ATCC19410","Crouxii_FRC0190","Csilvaticum_KL0182","Ctestudinoris_DSM44614","Culcerans_NCTC12077","Culcerans_NCTC7910"	0.367792	0.156874	3.06603	0.367792	0.156874	3.06603	2	1	1. 0.87309;2. 209;3. 625;4. 256;5. 234;6. 700;7. 238;8. 712;9. 517;10. I;11. ATT
ERS451417_00902	1717.62.peg.908	NA	NA	NA	1	32	Cargentoratense_DSM44202,"Catypicum_R2070","Cbelfantii_FRC0043","Ccallunae_DSM20147","Cdeserti_GIMN1010","Cdiphtheriae_NCTC11397","Cdoosanense_DSM45436","Cefficiens_YS314","Cepidermidicanis_DSM45586","Cfalsenii_DSM44353","Cglutamicum_ATCC13032","Cglycinophilum_AJ3170","Chalotolerans_YIM70093","Chumireducens_DSM45392","Cjeikeium_K41","Ckroppenstedtii_DSM44385","Ckutscheri_DSM20755","Clactis_RW25",…	0.0964438	0.0964438	1.849	0.0964438	0.0964438	1.849	258	0
ERS451417_02043	1717.62.peg.2053	NA	NA	NA	1	38	Cargentoratense_DSM44202,"Catypicum_R2070","Caurimucosum_ATCC700975","Cbelfantii_FRC0043","Ccallunae_DSM20147","Ccamporealensis_DSM44610","Cdeserti_GIMN1010","Cdiphtheriae_NCTC11397","Cdoosanense_DSM45436","Cefficiens_YS314","Cepidermidicanis_DSM45586","Cfalsenii_DSM44353","Cglutamicum_ATCC13032","Cglycinophilum_AJ3170","Chalotolerans_YIM70093","Chumireducens_DSM45392","Cimitans_DSM44264","Cjeike…	0.244542	0.244542	1.7384	0.244542	0.244542	1.7384	3330	0
ERS451417_02396	1717.62.peg.2428	NA	NA	NA	1	38	Cargentoratense_DSM44202,"Catypicum_R2070","Caurimucosum_ATCC700975","Cbelfantii_FRC0043","Ccallunae_DSM20147","Ccamporealensis_DSM44610","Cdeserti_GIMN1010","Cdiphtheriae_NCTC11397","Cdoosanense_DSM45436","Cefficiens_YS314","Cepidermidicanis_DSM45586","Cfalsenii_DSM44353","Cglutamicum_ATCC13032","Cglycinophilum_AJ3170","Chalotolerans_YIM70093","Chumireducens_DSM45392","Cimitans_DSM44264","Cjeike…	0.181101	0.181101	1.81569	0.181101	0.181101	1.81568	1282	0
ERS451417_02001	1717.62.peg.2005	NA	NA	NA	1	7	Cbelfantii_FRC0043,"Cdiphtheriae_NCTC11397","Cpseudotuberculosis_31","Cpseudotuberculosis_ATCC19410","Csilvaticum_KL0182","Culcerans_NCTC12077","Culcerans_NCTC7910"	0.231554	0.231554	3.02133	0.231554	0.231554	3.02133	2	1	1. 0.43128;2. 103;3. 307;4. 103;5. 103;6. 307;7. 103;8. 307;9. 307;10. G;11. GGA
[truncated: 88 more rows]
