# Supplementary material for: Evidence of episodic positive selection in Corynebacterium diphtheriae complex of species and its implementations in identification of drug and vaccine targets
Source: PeerJ. 2022 Feb 16;10:e12662. doi: 10.7717/peerj.12662 (PMC8857904; doi:10.7717/peerj.12662)
Supplement: Supplemental Information 15 [file peerj-10-12662-s015.xlsx]

## Sheet: Manual curation
Foreground	GenBank	PATRIC	FDR	NSS	MaxChi^2	PHI	Recombinant	Aligment	Domains
Cd	ERS451417_00402	1717.62.peg.402	0.0127	0	0	0.756	No	Ok	Ok
	ERS451417_00414	1717.62.peg.414	0.0132333	0	0.013	0.997	No	Ok	Ok
Cp	ERS451417_02135	1717.62.peg.2155	0.0040175	0.251	0.016	0.108	No	Ok	Different in Cd-Cb
	ERS451417_00570	1717.62.peg.573	0.00772375	0.018	0.564	0.833	No	Ok	Ok
	ERS451417_00159	1717.62.peg.157	0.0207083	0.012	0	0.39	No	Ok	Ok
	ERS451417_00951	1717.62.peg.958	0.031285	0	0	0.196	No	Ok	Ok
	ERS451417_00887	1717.62.peg.893	0.031285	0	0.139	1	No	Ok	Ok
	ERS451417_00548	1717.62.peg.552	0.0480556	0	0	0.722	No	Ok	Ok
	ERS451417_00880	1717.62.peg.886	0.0480556	0.346	0.183	0.706	No	Ok	Ok
	ERS451417_02267	1717.62.peg.2296	0.0480556	0	0.693	0.356	No	Ok	Ok
Cr	ERS451417_00470	1717.62.peg.474	0.013896	0.009	0.003	0.244	No	Ok	Ok
Cul	ERS451417_00836	1717.62.peg.841	0.02494	0	0.208	0.165	No	Ok	Ok
Cpequi	ERS451417_01169	1717.62.peg.1180	2.3885e-06	0	0	0.868	No	Ok	Ok
	ERS451417_01521	1717.62.peg.1530	7.0856e-05	0	0.002	1	No	Ok	Ok
Cul1	ERS451417_02360	1717.62.peg.2389	0.0016668	0.251	0.016	0.108	No	Ok	Ok
	ERS451417_00635	1717.62.peg.639	0.0075285	0.358	0.1	0.095	No	Ok	Ok
	ERS451417_00750	1717.62.peg.755	0.017793	0	0.014	1	No	Ok	Ok
Cul2	ERS451417_00985	1717.62.peg.996	0.010737	0	0.183	0.99	No	Ok	Ok
	ERS451417_01234	1717.62.peg.1242	0.0323325	0	0.006	1	No	Ok	Ok
