# Supplementary material for: Evidence of episodic positive selection in Corynebacterium diphtheriae complex of species and its implementations in identification of drug and vaccine targets
Source: PeerJ. 2022 Feb 16;10:e12662. doi: 10.7717/peerj.12662 (PMC8857904; doi:10.7717/peerj.12662)
Supplement: Supplemental Information 16 [file peerj-10-12662-s016.xlsx]

## Sheet: Annotation
Foreground	GenBank	PATRIC			PosiGene		GIPSy	PHASTER	SurfG+	Protter	PBIT							Vaxign	eggNOG-mapper
	ID	ID	Gene	Product	PS sites	Positions	G. island	Prophage	Local	Exposed PS sites	Virulence factor	Essential	Human proteome non-homology	Human anti-targets non-homology	Gut microbiota proteome non-homology	Drugability	Drug target	Epitope	Seed ortholog	e-value	score	best tax lvl	Preferred_name	GO terms	EC number	KEGG KO	KEGG pathway	KEGG module	KEGG reaction	KEGG rclass	BRITE	KEGG TC	CAZy	BiGG reaction	annot lvl	matching OGs	Best OG	COG cat	description
Cd	ERS451417_00414	1717.62.peg.414	ansB	L-asparaginase (EC 3.5.1.1)	3	69, 182, 339	GI10	-	S	69, 182, 339	No	Yes	-	-	-	-	-	Yes	698964.CDPW8_0479	9.8e-178	629.4	Corynebacteriaceae	ansA		3.5.1.1	ko:K01424	ko00250,ko00460,ko01100,ko01110,map00250,map00460,map01100,map01110		R00485	RC00010,RC02798	ko00000,ko00001,ko01000				Bacteria	22JKZ@1653,2HUB2@201174,COG0252@1,COG0252@2	NA|NA|NA	EJ	L-asparaginase archaeal Glu-tRNAGln amidotransferase subunit D
	ERS451417_00402	1717.62.peg.402	rpsC	SSU ribosomal protein S3p (S3e)	1	89	-	-	C	-	No	Yes	Yes	Yes	No	Yes	No	-	698964.CDPW8_0467	4.7e-105	387.5	Corynebacteriaceae	rpsC	GO:0000028,GO:0002181,GO:0003674,GO:0003735,GO:0005198,GO:0005575,GO:0005618,GO:0005622,GO:0005623,GO:0005737,GO:0005829,GO:0005840,GO:0005886,GO:0006412,GO:0006518,GO:0006807,GO:0006996,GO:0008150,GO:0008152,GO:0009058,GO:0009059,GO:0009987,GO:0010467,GO:0015935,GO:0016020,GO:0016043,GO:0019538,GO:0022607,GO:0022613,GO:0022618,GO:0022626,GO:0022627,GO:0030312,GO:0032991,GO:0034622,GO:0034641,GO:…		ko:K02982	ko03010,map03010	M00178,M00179			br01610,ko00000,ko00001,ko00002,ko03011				Bacteria	22KW5@1653,2GKF1@201174,COG0092@1,COG0092@2	NA|NA|NA	J	Binds the lower part of the 30S subunit head. Binds mRNA in the 70S ribosome, positioning it for translation
Cp	ERS451417_00548	1717.62.peg.552	mntC	ABC transporter, permease protein	1	111	-	-	M	-	Yes	Yes	-	-	-	-	No	Yes	698964.CDPW8_0616	5.2e-137	493.8	Corynebacteriaceae	yfeC			ko:K02075,ko:K09819		M00243,M00244			ko00000,ko00002,ko02000	3.A.1.15			Bacteria	22MJ3@1653,2ICUS@201174,COG1108@1,COG1108@2	NA|NA|NA	P	ABC 3 transport family protein
	ERS451417_00570	1717.62.peg.573	add	Adenosine deaminase	1	25	-	-	C	-	No	-	Yes	Yes	Yes	No	No	-	698964.CDPW8_0638	2.7e-174	617.8	Corynebacteriaceae	add	GO:0003674,GO:0003824,GO:0004000,GO:0005575,GO:0005622,GO:0005623,GO:0005737,GO:0005829,GO:0006139,GO:0006144,GO:0006152,GO:0006154,GO:0006725,GO:0006807,GO:0008150,GO:0008152,GO:0009056,GO:0009058,GO:0009112,GO:0009113,GO:0009116,GO:0009119,GO:0009163,GO:0009164,GO:0009987,GO:0016787,GO:0016810,GO:0016814,GO:0017144,GO:0018130,GO:0019239,GO:0019438,GO:0019439,GO:0034404,GO:0034641,GO:0034654,GO:…	3.5.4.4	ko:K01488	ko00230,ko01100,ko05340,map00230,map01100,map05340		R01560,R02556	RC00477	ko00000,ko00001,ko01000				Bacteria	22K3R@1653,2GJ6I@201174,COG1816@1,COG1816@2	NA|NA|NA	F	adenosine deaminase
	ERS451417_00159	1717.62.peg.157	spaE	Adhesin SpaE	20	23, 33, 35, 108, 119, 122, 125, 223, 232, 238, 239, 243, 244, 247, 251, 252, 253, 255, 257, 259	GI5	-	SE	23, 33, 35, 108, 119, 122, 125, 223	Yes	No	-	-	-	-	-	Yes	1719.CPTC_00943	2.3e-46	192.6	Corynebacteriaceae	spaE												Bacteria	22NSF@1653,2DX42@1,2GV07@201174,3439M@2	NA|NA|NA
	ERS451417_00887	1717.62.peg.893	folP2	Dihydropteroate synthase 2 (nonfunctional)	2	135, 158	-	-	C	-	No	Yes	Yes	Yes	Yes	Yes	Yes	-	698964.CDPW8_0948	3.6e-157	560.8	Corynebacteriaceae	folP2	GO:0005575,GO:0005622,GO:0005623,GO:0005737,GO:0005829,GO:0044424,GO:0044444,GO:0044464	2.5.1.15	ko:K00796	ko00790,ko01100,map00790,map01100	M00126,M00841	R03066,R03067	RC00121,RC00842	ko00000,ko00001,ko00002,ko01000				Bacteria	22KZJ@1653,2GJNI@201174,COG0294@1,COG0294@2	NA|NA|NA	H	Catalyzes the condensation of para-aminobenzoate (pABA) with 6-hydroxymethyl-7,8-dihydropterin diphosphate (DHPt-PP) to form 7,8-dihydropteroate (H2Pte), the immediate precursor of folate derivatives
	ERS451417_00880	1717.62.peg.886	-	HNH endonuclease	4	48, 111, 284, 352	-	-	C	-	No	Yes	Yes	Yes	Yes	No	No	-	698964.CDPW8_0941	4.9e-226	790.0	Corynebacteriaceae													Bacteria	22N07@1653,2HNBP@201174,COG1403@1,COG1403@2	NA|NA|NA	V	HNH endonuclease
	ERS451417_00951	1717.62.peg.958	prfA	Peptide chain release factor 1	1	60	-	-	C	-	No	Yes	No	Yes	No	No	No	-	698964.CDPW8_1014	5.2e-190	670.2	Corynebacteriaceae	prfA	GO:0008150,GO:0040007		ko:K02835					ko00000,ko03012				Bacteria	22KH8@1653,2GJWG@201174,COG0216@1,COG0216@2	NA|NA|NA	J	Peptide chain release factor 1 directs the termination of translation in response to the peptide chain termination codons UAG and UAA
	ERS451417_02135	1717.62.peg.2155	mphP_2	Putative oxidoreductase	8	33, 42, 48, 52, 109, 209, 226, 285	-	-	C	-	Yes	No	Yes	Yes	Yes	No	No	-	698964.CDPW8_2069	1.5e-205	721.8	Corynebacteriaceae	pyrK			ko:K02823	ko00240,ko01100,map00240,map01100				ko00000,ko00001				Bacteria	22MIQ@1653,2IDV4@201174,COG0543@1,COG0543@2	NA|NA|NA	CH	2-polyprenylphenol hydroxylase and related flavodoxin oxidoreductases
	ERS451417_02267	1717.62.peg.2296	pgmB	Putative phosphoglycerate mutase	2	69, 143	-	-	C	-	No	Yes	Yes	Yes	Yes	Yes	Yes	-	698964.CDPW8_2210	5.8e-112	410.2	Corynebacteriaceae	pgmB		5.4.2.11	ko:K01834	ko00010,ko00260,ko00680,ko01100,ko01110,ko01120,ko01130,ko01200,ko01230,ko04922,ko05230,map00010,map00260,map00680,map01100,map01110,map01120,map01130,map01200,map01230,map04922,map05230	M00001,M00002,M00003	R01518	RC00536	ko00000,ko00001,ko00002,ko01000,ko04131,ko04147				Bacteria	22KV7@1653,2GP71@201174,COG0406@1,COG0406@2	NA|NA|NA	G	Belongs to the phosphoglycerate mutase family
Cpequi	ERS451417_01521	1717.62.peg.1530	mapB	Methionine aminopeptidase (EC 3.4.11.18)	2	96, 97	-	-	C	-	No	Yes	Yes	Yes	No	Yes	No	-	698964.CDPW8_1486	8.4e-170	602.8	Corynebacteriaceae	map	GO:0000096,GO:0003674,GO:0003824,GO:0004177,GO:0005488,GO:0005506,GO:0006082,GO:0006464,GO:0006508,GO:0006520,GO:0006555,GO:0006790,GO:0006807,GO:0008150,GO:0008152,GO:0008233,GO:0008235,GO:0008237,GO:0008238,GO:0009066,GO:0009987,GO:0010467,GO:0016151,GO:0016485,GO:0016787,GO:0019538,GO:0019752,GO:0030145,GO:0035551,GO:0036211,GO:0043167,GO:0043169,GO:0043170,GO:0043412,GO:0043436,GO:0044237,GO:…	3.4.11.18	ko:K01265					ko00000,ko01000,ko01002				Bacteria	22JZ9@1653,2GKIZ@201174,COG0024@1,COG0024@2	NA|NA|NA	E	Methionine aminopeptidase
	ERS451417_01169	1717.62.peg.1180	tyrS	Tyrosyl-tRNA synthetase (EC 6.1.1.1)	4	23, 58, 59, 403	-	-	C	-	Yes	Yes	Yes	Yes	No	Yes	No	-	698964.CDPW8_1154	3.8e-240	837.0	Corynebacteriaceae	tyrS	GO:0003674,GO:0003824,GO:0004812,GO:0004831,GO:0005575,GO:0005618,GO:0005622,GO:0005623,GO:0005737,GO:0005829,GO:0005886,GO:0006082,GO:0006139,GO:0006399,GO:0006520,GO:0006725,GO:0006807,GO:0008150,GO:0008152,GO:0009987,GO:0016020,GO:0016070,GO:0016874,GO:0016875,GO:0019752,GO:0030312,GO:0034641,GO:0034660,GO:0040007,GO:0043038,GO:0043039,GO:0043170,GO:0043436,GO:0044237,GO:0044238,GO:0044281,GO:…	6.1.1.1	ko:K01866	ko00970,map00970	M00359,M00360	R02918	RC00055,RC00523	ko00000,ko00001,ko00002,ko01000,ko01007,ko03016,ko03029				Bacteria	22KEW@1653,2GJPR@201174,COG0162@1,COG0162@2	NA|NA|NA	J	Catalyzes the attachment of tyrosine to tRNA(Tyr) in a two-step reaction tyrosine is first activated by ATP to form Tyr- AMP and then transferred to the acceptor end of tRNA(Tyr)
Cr	ERS451417_00470	1717.62.peg.474	-	Hypothetical protein	4	5, 74, 95, 154	-	-	M	154	No	-	-	-	-	-	-	Yes	698964.CDPW8_0536	7e-122	443.4	Corynebacteriaceae	traX												Bacteria	22NRC@1653,2AYHW@1,2I9DQ@201174,32WBP@2	NA|NA|NA	S	TraX protein
Cul	ERS451417_00836	1717.62.peg.841	glyA	Serine hydroxymethyltransferase (EC 2.1.2.1)	1	385	-	-	C	-	No	Yes	No	Yes	No	Yes	No	-	698964.CDPW8_0898	9.2e-242	842.4	Corynebacteriaceae	glyA	GO:0001505,GO:0003674,GO:0003824,GO:0004372,GO:0005488,GO:0005515,GO:0005575,GO:0005618,GO:0005623,GO:0005886,GO:0006082,GO:0006520,GO:0006544,GO:0006563,GO:0006807,GO:0008144,GO:0008150,GO:0008152,GO:0009069,GO:0009605,GO:0009607,GO:0009987,GO:0016020,GO:0016740,GO:0016741,GO:0016742,GO:0017144,GO:0019752,GO:0019842,GO:0020012,GO:0030170,GO:0030312,GO:0030682,GO:0036094,GO:0042133,GO:0042783,GO:…	2.1.2.1	ko:K00600	ko00260,ko00460,ko00630,ko00670,ko00680,ko01100,ko01110,ko01120,ko01130,ko01200,ko01230,ko01523,map00260,map00460,map00630,map00670,map00680,map01100,map01110,map01120,map01130,map01200,map01230,map01523	M00140,M00141,M00346,M00532	R00945,R09099	RC00022,RC00112,RC01583,RC02958	ko00000,ko00001,ko00002,ko01000				Bacteria	22KID@1653,2GK7U@201174,COG0112@1,COG0112@2	NA|NA|NA	E	Catalyzes the reversible interconversion of serine and glycine with tetrahydrofolate (THF) serving as the one-carbon carrier. This reaction serves as the major source of one-carbon groups required for the biosynthesis of purines, thymidylate, methionine, and other important biomolecules. Also exhibits THF- independent aldolase activity toward beta-hydroxyamino acids, producing glycine and aldehyd…
Cul1	ERS451417_00635	1717.62.peg.639	-	Hypothetical protein	1	32	-	-	C	-	-	-	Yes	Yes	Yes	No	No	-	945712.CULC22_00579	2.8e-20	105.1	Corynebacteriaceae													Bacteria	22PQD@1653,2B4P5@1,2HZ2B@201174,31XFD@2	NA|NA|NA
	ERS451417_02360	1717.62.peg.2389	dhaK	Phosphoenolpyruvate-dihydroxyacetone phosphotransferase (EC 2.7.1.121), dihydroxyacetone binding subunit DhaK	4	248, 251, 255, 256	GI34	-	C	-	Yes	Yes	Yes	Yes	No	Yes	No	-	698964.CDPW8_2314	1e-176	625.9	Corynebacteriaceae	dhaK	GO:0003674,GO:0003824,GO:0006793,GO:0006796,GO:0008150,GO:0008152,GO:0009987,GO:0016301,GO:0016310,GO:0016740,GO:0016772,GO:0016773,GO:0044237,GO:0047324	2.7.1.121,2.7.1.28,2.7.1.29,4.6.1.15	ko:K00863,ko:K05878	ko00051,ko00561,ko00680,ko01100,ko01120,ko01200,ko04622,map00051,map00561,map00680,map01100,map01120,map01200,map04622	M00344	R01011,R01012,R01059	RC00002,RC00015,RC00017	ko00000,ko00001,ko00002,ko01000				Bacteria	22M1K@1653,2GJV9@201174,COG2376@1,COG2376@2	NA|NA|NA	G	Dak1 domain
	ERS451417_00750	1717.62.peg.755	citE	Similar to citrate lyase beta chain, 3	1	235	-	-	C	-	Yes	Yes	Yes	Yes	Yes	Yes	Yes	-	698964.CDPW8_0817	7.7e-157	559.7	Corynebacteriaceae	citE	GO:0000287,GO:0003674,GO:0005488,GO:0006082,GO:0006107,GO:0008150,GO:0008152,GO:0009987,GO:0019752,GO:0043167,GO:0043169,GO:0043436,GO:0043648,GO:0044237,GO:0044281,GO:0046872,GO:0071704	4.1.3.25,4.1.3.34	ko:K01644,ko:K18292	ko00660,ko01100,ko02020,map00660,map01100,map02020		R00237,R00362	RC00067,RC00502,RC01118,RC01205	ko00000,ko00001,ko01000				Bacteria	22JXZ@1653,2GK5J@201174,COG2301@1,COG2301@2	NA|NA|NA	G	Belongs to the HpcH HpaI aldolase family
Cul2	ERS451417_00985	1717.62.peg.996	dnaQ	DNA polymerase III epsilon subunit (EC 2.7.7.7)	1	142	-	-	C	-	No	Yes	Yes	Yes	Yes	No	No	-	698964.CDPW8_1051	4.7e-131	473.8	Corynebacteriaceae	dnaQ2		2.7.7.7	ko:K02337,ko:K02342,ko:K09951	ko00230,ko00240,ko01100,ko03030,ko03430,ko03440,map00230,map00240,map01100,map03030,map03430,map03440	M00260	R00375,R00376,R00377,R00378	RC02795	ko00000,ko00001,ko00002,ko01000,ko02048,ko03032,ko03400				Bacteria	22KE5@1653,2I2KI@201174,COG0847@1,COG0847@2	NA|NA|NA	L	DNA polymerase III
	ERS451417_01234	1717.62.peg.1242	cobK	Precorrin-6A reductase (EC 1.3.1.54)	1	206	-	-	C	-	No	Yes	Yes	Yes	Yes	No	No	-	698964.CDPW8_1213	4.7e-134	483.8	Corynebacteriaceae	cobK		1.3.1.106,1.3.1.54,1.3.1.76,2.1.1.131,2.1.1.132,3.7.1.12,4.99.1.4	ko:K00595,ko:K02304,ko:K05895,ko:K05934,ko:K13541	ko00860,ko01100,ko01110,ko01120,map00860,map01100,map01110,map01120	M00121	R02864,R03947,R05149,R05150,R05180,R05809,R05812,R07772	RC00003,RC01012,RC01034,RC01279,RC01280,RC01293,RC01545,RC02097,RC03471	ko00000,ko00001,ko00002,ko01000				Bacteria	22KZH@1653,2GMYZ@201174,COG2099@1,COG2099@2	NA|NA|NA	H	reductase
