# Supplementary material for: Evidence of episodic positive selection in Corynebacterium diphtheriae complex of species and its implementations in identification of drug and vaccine targets
Source: PeerJ. 2022 Feb 16;10:e12662. doi: 10.7717/peerj.12662 (PMC8857904; doi:10.7717/peerj.12662)
Supplement: Supplemental Information 17 [file peerj-10-12662-s017.xlsx]

## Sheet: Genomic islands
n	Type				Base range
1	M	S	R	P	18955..24259
2					34324..43212
3		S	R	P	52772..87304
4					94114..101801
5	M	S		P	129737..166080
6			R		176876..186356
7	M	S	R	P	189728..207394
8			R	P	233326..273105
9		S	R		362288..378133
10	M				394456..403524
11	M	S	R	P	495187..508722
12	M				588695..601902
13	M	S			656949..666510
14		S		P	673438..690305
15	M	S	R	P	790494..798223
16	M	S	R	P	848080..857858
17	M	S	R	P	962639..974637
18	M	S	R	P	988192..996122
19	M				1024098..1033992
20					1378673..1394828
21					1501623..1507436
22	M				1877890..1887295
23				P	1905904..1924077
24	M	S	R		1954479..1960638
25					2031975..2051319
26		S	R	P	2074714..2131018
27			R		2136367..2144704
28	M	S	R	P	2159845..2194659
29		S	R	P	2205659..2224717
30					2243580..2248867
31					2268932..2300986
32	M	S		P	2311941..2328058
33		S	R		2342868..2353862
34	M	S	R	P	2370995..2421743
35	M	S			2425474..2433304
*M - metabolic island, S - symbiotic island, R - resistance island, P - pathogenicity island
